# Supplementary material
Source: Research Square preprint supplement (doi:10.21203/rs.3.rs-10301703/v1)
Supplement: Supplementary file 1 [file 165126bd930c1232a5e8eb88.docx]

| **Nutrients** | **Enrg** | **Prot** | **Carbs** | **Sug** | **Str** | **Fib** | **Fat** | **SFA** | **MUFA** | **PUFA** | **VitA** | **VitE** | **Na** | **Mg** | **P** | **K** | **Ca** | **Mn** | **Fe** | **Cu** | **Zn** | **Se** | **I** |
| --- | --- | --- | --- | --- | --- | --- | --- | --- | --- | --- | --- | --- | --- | --- | --- | --- | --- | --- | --- | --- | --- | --- | --- |
| **Units** | **Calorie** | **g** | **g** | **g** | **g** | **g** | **g** | **g** | **g** | **g** | **RAU** | **mg** | **mg** | **mg** | **mg** | **mg** | **mg** | **mg** | **mg** | **mg** | **mg** | **mcg** | **mcg** |
| **Recommended Dietary Allowances (RDAs) of France* (per capita per day)** | 2413 | 63 | 332 | 28 | 250 | 25 | 79 | 26 | 39 | 13,1 | 671 | 13,9 | 1920 | 214 | 738 | 3183 | 1058 | 1,9 | 11,5 | 0,83 | 8,9 | 51 | 118 |
| **Actual diet consumption****§**  **(per capita per day)** | 1968 | 78 | 214 | 90 | 102 | 18 | 75 | 32 | 28 | 8,9 | 735 | 10,6 | 2278 | 289 | 1155 | 3082 | 849 | 3,0 | 9,7 | 1,33 | 9,5 | 144 | 163 |
| **Production of France 2022****¶**  **(per capita per day)** | 3376 | 117 | 514 | 221 | 251 | 32 | 89 | 40 | 31 | 12,1 | 616 | 12,1 | 2420 | 499 | 2255 | 4746 | 1768 | 4,9 | 13,2 | 2,03 | 15,6 | 158 | 361 |
|  | **Nutrients’ self-sufficiency ratio****ʢ** | | | | | | | | | | | | | | | | | | | | | | |
| **based on RDAs+** | 1,40 | 1,85 | 1,55 | 7,89 | 1,01 | 1,27 | 1,13 | 1,51 | 0,78 | 0,93 | 0,92 | 0,87 | 1,26 | 2,33 | 3,06 | 1,49 | 1,67 | 2,54 | 1,15 | 2,44 | 1,75 | 3,09 | 3,05 |
| **based on actual intake** | 1,72 | 1,51 | 2,40 | 2,44 | 2,47 | 1,81 | 1,19 | 1,25 | 1,10 | 1,37 | 0,83 | 1,14 | 1,06 | 1,73 | 1,95 | 1,54 | 2,08 | 1,64 | 1,36 | 1,53 | 1,65 | 1,10 | 2,22 |

**Table S1.** France nutrients self-sufficiency levels based on two dietary references (recommended dietary allowance and actual intakes).

***** The (FAO&WHO&NIH&NHS and others) Recommended Dietary Allowances (RDAs) of nutrients were calculated or defined based on the average individual (micronutrient calculations take into account the specific requirements of different population groups and their respective proportions within France **(see Annex 3)**.

**§** The actual dietary consumption levels represent the average individual intake calculated for the French population during the years 2014–2015, derived from observed food intake data collected in 2014 **(see Annex 2)**. In this study, these values are assumed to reflect the actual nutrient requirements of the French population during current decade (including 2022 year).

**¶** The actual production of France is calculated based on the national production of crop and animal products in 2022 and expressed as an average per capita per day value **(see Annex 1)**.

**ʢ** The ratio of the consumption (or demand) and the production: (x>1) represent a sufficiency level and (x<1) represent an insufficiency level.

**+** Calculated based on the RDAs level of nutrients consumption.

**Ω** Calculated based on the real dietary consumption level of a France’s mean individual.

**Enrg: Energy; Prot: Protein; Carbs: Carbohydrates; Sug: Sugar; Str: Starch; Fib: Fibers; Fat: Fat; SFA: Saturated fat; MUFA: Monounsaturated fat; PUFA: Polyunsaturated fat; VitA: Vitamin A; VitE: Vitamin E; Na: Sodium; Mg: Magnesium; P: Phosphorus; K: Potassium; Ca: Calcium; Mn: Manganese; Fe: Iron; Cu: Copper; Zn: Zinc; Se: Selenium; I: Iodine.**

**Supplementary Result of Table S1 : *Actual Dietary Intakes Relative to the Recommended Dietary Allowances***

Compared with RDAs, actual dietary intakes of energy-adjusted nutrients in the French population pattern differ substantially across several nutrients **(Table S1)**. Mean total energy intake is lower than recommended (1968 *vs.* 2413 kcal per capita per day), accompanied by low actual consumption of total carbohydrates, dietary fiber and most unsaturated fats, whereas protein intake exceeds RDAs defined levels. Total sugar intake exceeds the recommended upper level by more than threefold, in contrast to low starch consumption, reflecting poor carbohydrate quality. Although total fat intake is close to the reference value, the dietary fat profile is less favorable, with relatively higher saturated fat and lower mono- and polyunsaturated fat than recommended. Several micronutrients commonly associated with plant-based foods and dairy products; including β-carotene, vitamin E, calcium and iron, are low as compared to reference values. In contrast, sodium and other minerals; including magnesium, phosphorus, potassium, manganese, copper, zinc, selenium and iodine, are generally consumed at or above their RDAs, and in some cases markedly so.

**Table S2.** Food groups contribution (%) in the total nutrients’ production.

|  | **Cereals** | **Tubers** | **Legumes** | **Fruits** | **Vegetables** | **Nuts** | **Sugar and product** | **Other products** | **Beaf & Lamb & others** | **Poultry meat** | **Pork** | **Dairy product** | **Eggs** | **Fish** | **Crop products** | **Animal Products** |
| --- | --- | --- | --- | --- | --- | --- | --- | --- | --- | --- | --- | --- | --- | --- | --- | --- |
| **Energy** | 35,4 | 10,0 | 0,7 | 1,8 | 1,0 | 0,6 | 18,4 | 0,4 | 2,8 | 0,4 | 4,6 | 22,0 | 1,4 | 0,5 | **68,3** | **31,7** |
| **Protein** | 29,6 | 4,4 | 1,4 | 1,2 | 1,0 | 0,2 | 0,3 | 0,4 | 11,4 | 1,5 | 9,8 | 34,4 | 3,5 | 0,8 | **38,6** | **61,4** |
| **Carbs** | 42,7 | 11,6 | 0,5 | 2,0 | 1,1 | 0,1 | 30,2 | 0,6 | 0,1 | 0,0 | 0,1 | 10,8 | 0,1 | 0,1 | **88,8** | **11,2** |
| **Sugar** | 2,9 | 1,1 | 0,5 | 3,3 | 1,3 | 0,0 | 69,7 | 0,0 | 0,0 | 0,0 | 0,1 | 20,7 | 0,1 | 0,1 | **79,0** | **21,0** |
| **Starch** | 78,8 | 19,6 | 0,4 | 0,8 | 0,1 | 0,0 | 0,0 | 0,2 | 0,0 | 0,0 | 0,0 | 0,0 | 0,0 | 0,1 | **99,9** | **0,1** |
| **Fiber** | 60,1 | 16,6 | 5,2 | 6,1 | 5,6 | 0,4 | 0,5 | 4,2 | 0,1 | 0,0 | 0,4 | 0,0 | 0,0 | 0,7 | **98,8** | **1,2** |
| **Fat** | 17,3 | 8,7 | 0,3 | 1,2 | 0,4 | 2,1 | 0,1 | 0,4 | 5,1 | 0,9 | 13,2 | 44,5 | 4,5 | 1,1 | **30,6** | **69,4** |
| **SFA** | 10,0 | 4,3 | 0,3 | 0,4 | 0,2 | 0,4 | 0,1 | 0,3 | 4,5 | 0,6 | 11,4 | 63,5 | 3,0 | 1,0 | **15,9** | **84,1** |
| **MUFA** | 15,1 | 11,8 | 0,1 | 1,2 | 0,3 | 1,9 | 0,0 | 0,6 | 5,7 | 1,1 | 16,5 | 39,1 | 5,5 | 1,1 | **31,0** | **69,0** |
| **PUFA** | 35,0 | 16,5 | 0,9 | 2,9 | 0,7 | 8,7 | 0,0 | 1,0 | 2,8 | 1,2 | 11,2 | 12,7 | 4,8 | 1,5 | **65,8** | **34,2** |
| **Retinol** | 1,1 | 1,4 | 0,0 | 0,0 | 0,1 | 0,0 | 0,0 | 0,0 | 23,0 | 0,2 | 7,8 | 55,3 | 9,7 | 1,5 | **2,6** | **97,4** |
| **BC** | 4,9 | 0,4 | 5,7 | 9,9 | 41,6 | 0,0 | 0,0 | 0,6 | 0,3 | 0,0 | 0,3 | 35,5 | 0,3 | 0,6 | **63,1** | **36,9** |
| **Vit.E** | 58,6 | 16,5 | 0,5 | 3,3 | 2,2 | 1,3 | 0,0 | 1,4 | 1,9 | 0,2 | 1,7 | 6,0 | 5,0 | 1,4 | **83,8** | **16,2** |
| **Sodium** | 32,6 | 8,7 | 0,8 | 3,4 | 1,4 | 0,0 | 0,8 | 0,0 | 7,5 | 0,8 | 20,1 | 20,6 | 1,3 | 2,1 | **47,7** | **52,3** |
| **Magnesium** | 46,2 | 9,7 | 1,8 | 3,9 | 2,2 | 0,5 | 3,4 | 1,6 | 2,4 | 0,4 | 2,2 | 24,4 | 0,6 | 0,8 | **69,3** | **30,7** |
| **Phosphorus** | 28,4 | 5,7 | 1,1 | 1,7 | 1,3 | 0,3 | 0,1 | 0,4 | 4,7 | 0,6 | 4,5 | 48,5 | 2,0 | 0,6 | **39,0** | **61,0** |
| **Potassium** | 16,5 | 22,0 | 1,5 | 5,7 | 3,9 | 0,2 | 2,6 | 1,1 | 3,5 | 0,4 | 3,9 | 37,3 | 0,8 | 0,5 | **53,6** | **46,4** |
| **Calcium** | 7,2 | 2,1 | 0,8 | 0,7 | 1,8 | 0,1 | 4,0 | 1,2 | 0,5 | 0,1 | 0,5 | 79,7 | 0,9 | 0,6 | **17,8** | **82,2** |
| **Manganese** | 67,2 | 6,2 | 1,7 | 3,2 | 3,2 | 1,3 | 1,6 | 11,2 | 0,4 | 0,1 | 0,6 | 2,0 | 0,2 | 1,1 | **95,6** | **4,4** |
| **Iron** | 41,2 | 10,3 | 2,7 | 4,3 | 3,3 | 0,3 | 6,8 | 5,5 | 9,2 | 0,5 | 7,6 | 3,2 | 3,4 | 1,7 | **74,5** | **25,5** |
| **Copper** | 46,9 | 11,6 | 2,0 | 4,0 | 2,7 | 1,2 | 1,6 | 2,8 | 10,4 | 0,4 | 2,9 | 11,4 | 1,0 | 1,1 | **72,8** | **27,2** |
| **Zinc** | 32,3 | 4,3 | 1,1 | 1,4 | 1,3 | 0,3 | 0,5 | 0,4 | 16,7 | 0,8 | 7,3 | 30,7 | 2,0 | 0,9 | **41,6** | **58,4** |
| **Selenium** | 39,8 | 8,7 | 1,8 | 2,4 | 3,4 | 0,1 | 2,0 | 0,2 | 3,1 | 0,6 | 4,1 | 27,6 | 5,4 | 0,9 | **58,4** | **41,6** |
| **Iodine** | 13,0 | 3,8 | 0,9 | 0,7 | 1,5 | 0,0 | 0,1 | 0,1 | 0,9 | 0,2 | 1,6 | 69,2 | 6,9 | 0,9 | **20,2** | **79,8** |
| **Food quantity*** | 24,5 | 8,8 | 1,5 | 3,1 | 2,6 | 0,1 | 6,2 | 0,2 | 2,0 | 0,3 | 2,2 | 46,9 | 1,3 | 0,4 | **47,0** | **53,0** |

***** Food groups contribution (%) in the total food quantity production.

SFA: saturated fat ; MUFA: Monounsaturated fat ; PUFA: Polyunsaturated fat ; BC: Beta-Carotene ; Vit.E: Vitamin E

**Table S3.** Food groups contribution (%) in the total nutrients’ consumption.

|  | **Cereals** | **Tubers** | **Legumes** | **Fruits** | **Vegetables** | **Nuts** | **Sugar and product** | **Other products** | **Beaf & Lamb & others** | **Poultry meat** | **Pork** | **Dairy product** | **Eggs** | **Fish** | **Crop products** | **Animal Products** |
| --- | --- | --- | --- | --- | --- | --- | --- | --- | --- | --- | --- | --- | --- | --- | --- | --- |
| **Energy (Calories)** | 24,4 | 4,8 | 1,7 | 8,2 | 1,6 | 0,8 | 8,3 | 12,3 | 4,3 | 2,9 | 5,6 | 21,1 | 1,8 | 2,2 | **62,0** | **38,0** |
| **Protein (g)** | 15,2 | 1,9 | 2,3 | 2,9 | 1,7 | 0,5 | 0,0 | 3,7 | 14,8 | 10,3 | 12,5 | 21,5 | 3,9 | 8,8 | **28,1** | **71,9** |
| **Carbs (g)** | 46,5 | 7,2 | 1,3 | 13,8 | 2,1 | 0,2 | 18,6 | 3,8 | 0,0 | 0,1 | 0,2 | 6,2 | 0,1 | 0,1 | **93,3** | **6,7** |
| **Sugar (g)** | 1,2 | 0,8 | 0,6 | 30,3 | 3,6 | 0,1 | 46,0 | 1,9 | 0,0 | 0,0 | 0,3 | 15,0 | 0,1 | 0,0 | **84,5** | **15,5** |
| **Starch (g)** | 84,3 | 12,0 | 1,6 | 0,8 | 0,2 | 0,1 | 0,0 | 0,9 | 0,0 | 0,0 | 0,0 | 0,0 | 0,0 | 0,0 | **99,9** | **0,1** |
| **Fiber (g)** | 23,0 | 8,5 | 10,3 | 25,5 | 13,1 | 1,4 | 0,3 | 14,2 | 0,0 | 0,0 | 0,5 | 3,1 | 0,0 | 0,1 | **96,3** | **3,7** |
| **Fat (g)** | 1,9 | 3,2 | 1,5 | 2,2 | 0,4 | 1,7 | 0,0 | 26,7 | 5,0 | 3,1 | 9,4 | 39,8 | 3,2 | 1,8 | **37,6** | **62,4** |
| **Sat.Fat (g)** | 0,8 | 2,0 | 0,6 | 1,2 | 0,2 | 0,4 | 0,0 | 14,0 | 5,1 | 2,4 | 8,5 | 61,8 | 2,2 | 0,9 | **19,2** | **80,8** |
| **Muns.Fat (g)** | 0,9 | 3,9 | 1,6 | 2,0 | 0,2 | 2,5 | 0,0 | 39,3 | 5,1 | 3,3 | 10,5 | 25,4 | 3,5 | 1,7 | **50,5** | **49,5** |
| **Puns.Fat (g)** | 6,2 | 5,5 | 4,7 | 3,8 | 1,0 | 4,4 | 0,0 | 39,8 | 3,0 | 4,6 | 9,5 | 9,0 | 3,7 | 4,7 | **65,4** | **34,6** |
| **Retinol (mcg)** | 0,0 | 0,5 | 0,0 | 0,4 | 0,0 | 0,0 | 0,0 | 0,6 | 11,8 | 4,8 | 22,5 | 52,9 | 5,2 | 1,3 | **1,6** | **98,4** |
| **BC (mcg)** | 0,1 | 0,1 | 2,5 | 28,1 | 61,9 | 0,0 | 0,0 | 3,5 | 0,4 | 0,0 | 0,2 | 3,1 | 0,1 | 0,0 | **96,2** | **3,8** |
| **Vit.E (mg)** | 4,9 | 2,2 | 0,9 | 13,3 | 4,1 | 3,0 | 0,2 | 53,5 | 1,7 | 0,7 | 1,2 | 7,4 | 3,0 | 3,9 | **82,1** | **17,9** |
| **Sodium (mg)** | 2,3 | 1,7 | 1,4 | 3,0 | 1,6 | 0,0 | 0,1 | 51,4 | 2,8 | 3,0 | 13,0 | 14,0 | 1,2 | 4,5 | **61,5** | **38,5** |
| **Magnesium (mg)** | 15,4 | 5,0 | 4,7 | 13,5 | 4,4 | 1,8 | 0,6 | 23,5 | 4,4 | 3,5 | 3,8 | 14,4 | 1,0 | 4,0 | **69,0** | **31,0** |
| **Phosphorus (mg)** | 14,6 | 3,2 | 2,5 | 5,8 | 2,6 | 0,9 | 0,1 | 6,9 | 7,7 | 6,0 | 7,6 | 33,3 | 3,3 | 5,5 | **36,5** | **63,5** |
| **Potassium (mg)** | 6,5 | 9,9 | 2,5 | 20,4 | 6,8 | 0,6 | 0,4 | 20,7 | 5,1 | 3,6 | 5,2 | 14,0 | 0,9 | 3,4 | **67,9** | **32,1** |
| **Calcium (mg)** | 4,0 | 1,4 | 3,3 | 5,7 | 4,0 | 0,5 | 1,3 | 5,0 | 0,8 | 0,4 | 0,8 | 69,1 | 1,6 | 1,9 | **25,3** | **74,7** |
| **Manganese (mg)** | 29,0 | 2,6 | 3,9 | 9,7 | 5,3 | 2,0 | 0,5 | 43,2 | 0,5 | 0,2 | 0,8 | 1,2 | 0,2 | 0,7 | **96,3** | **3,7** |
| **Iron (mg)** | 16,8 | 3,6 | 5,4 | 8,7 | 4,1 | 0,8 | 0,8 | 23,2 | 12,3 | 4,4 | 7,9 | 3,5 | 4,5 | 3,5 | **63,9** | **36,1** |
| **Copper (mg)** | 18,5 | 5,0 | 5,1 | 13,3 | 5,5 | 2,6 | 0,4 | 18,9 | 8,9 | 2,5 | 5,9 | 6,2 | 1,2 | 6,0 | **69,3** | **30,7** |
| **Zinc (mg)** | 12,9 | 1,8 | 2,5 | 3,3 | 2,3 | 0,8 | 0,1 | 6,7 | 24,3 | 5,0 | 10,8 | 21,4 | 2,8 | 5,4 | **30,3** | **69,7** |
| **Selenium (mcg)** | 8,8 | 2,9 | 1,8 | 13,5 | 4,9 | 0,2 | 1,8 | 29,7 | 3,3 | 3,7 | 4,5 | 10,5 | 2,7 | 11,7 | **63,7** | **36,3** |
| **Iodine (mcg)** | 6,3 | 2,1 | 1,1 | 8,2 | 3,7 | 0,1 | 0,4 | 27,4 | 1,9 | 1,4 | 2,3 | 24,9 | 8,2 | 11,9 | **49,4** | **50,6** |
| **Food quantity*** | 11,1 | 4,1 | 2,1 | 18,6 | 5,3 | 0,2 | 2,5 | 29,1 | 2,8 | 1,9 | 2,8 | 16,3 | 1,4 | 1,9 | **73,0** | **27,0** |

***** Food groups contribution (%) in the total food quantity consumption

SFA: saturated fat ; MUFA: Monounsaturated fat ; PUFA: Polyunsaturated fat ; BC: Beta-Carotene ; Vit.E: Vitamin E **Supplementary Results of Table S2 and Table S3: *Relative Contributions of Food Groups to Nutrients Production and Consumption***

Crop products constitute the backbone of major nutrient across both production and consumption profiles in France, whereas animal-source foods contribute disproportionately to the provision and intake of protein, fats and several essential micronutrients **(Table S2 ; Table S3)**. Cereals and tubers dominate this system, providing together approximately one-thirds to a half of total dietary energy and nearly all starch across both national production and actual intake, while also contributing substantially to fiber and key minerals such as magnesium, potassium, manganese, iron, copper and zinc. Sugar and sugar-derived products add limited nutritional value in terms of protein and micronutrients but account for a significant share of total carbohydrates and free sugars, reinforcing their role in excess energy intake. Conversely, fruits, vegetables, legumes and nuts contribute relatively little to overall caloric supply-intake yet deliver a substantial proportion of β-carotene, vitamin E, and several micronutrients, highlighting their critical role in ensuring dietary quality rather than energy provision.

Animal-source foods represent roughly one-third of total energy but account for the majority of protein and fat in both the production system and the actual population diet. Dairy products are the dominant animal-source contributor, providing large shares of dietary protein and fat and accounting for most of the calcium and iodine supply-intake, while also contributing substantially to retinol, selenium and phosphorus. Pork and beef-and-lamb products supply-intake together represent an important fraction of total and saturated fat and constitute key sources of iron, zinc, copper and selenium. Poultry contributes more modestly to overall nutrient and energy supply, yet its consumption represents a significant share of total protein and unsaturated fat in actual dietary intakes. Eggs and fish supply-intake account for relatively small shares of total nutrient yet make targeted contributions to protein, vitamins A and E, and selected minerals, meaning their nutritional importance exceeds their quantitative weight in the food system.

**Table S4.** Self-sufficiency levels and diversity display of food groups based on quantity and energy indicators under demand level of, i) actual dietary consumption and ii) EAT-Lancet dietary recommendations.

|  | | **Crop food groups** | | | | | | | | **Animal food groups** | | | | | |
| --- | --- | --- | --- | --- | --- | --- | --- | --- | --- | --- | --- | --- | --- | --- | --- |
| Food Groups “FG” * | | **Cereals** | **Tubers** | **Vegetables** | **Fruits** | **Legumes** | **Nuts** | **Sugar & products** | **other products** | **Beaf & Lamb** | **Pork** | **Poultry** | **Milk** | **Eggs** | **Fish** |
| Food groups’ Quantity (g/day) | Production | 626,45 | 223,94 | 66,84 | 79,69 | 37,55 | 3,15 | 157,41 | 0,22 | 51,39 | 55,98 | 7,07 | 1197,25 | 34,07 | 8,97 |
| Actual dietary consumption§ | 176,02 | 65,26 | 83,87 | 295,05 | 33,01 | 2,59 | 40,16 | 20,55 | 41,19 | 43,93 | 29,72 | 258,07 | 22,16 | 30,67 |
| EAT-Lancet diet+ | 232,00 | 50,00 | 300,00 | 200,00 | 100,00 | 25,00 | 31,00 | 45,00 | 7,00 | 7,00 | 29,00 | 250,00 | 13,00 | 28,00 |
| **FG QuantityΩ SSR (Actual dietary)** | | **3,56** | **3,43** | **0,80** | **0,27** | **1,14** | **1,22** | **3,92** | **0,01** | **1,25** | **1,27** | **0,24** | **4,64** | **1,54** | **0,29** |
| **FG Quantity SSR (EAT-Lancet diet)** | | **2,70** | **4,48** | **0,22** | **0,40** | **0,38** | **0,13** | **5,08** | **0,01** | **7,34** | **8,00** | **0,24** | **4,79** | **2,62** | **0,32** |
| **Food diversity index****¶ for FG Quantity SS** | | **Actual dietary: 9 (14) - 5C & 4A**  **EAT-Lancet diet: 7 (14) - 3C & 4A** | | | | | | | | | | | | | |
| Food groups’ Energy (kcal/day) | Production | 1193,94 | 339,07 | 32,57 | 61,83 | 23,33 | 19,38 | 622,18 | 2,02 | 95,82 | 154,11 | 14,28 | 742,34 | 46,46 | 16,08 |
| Actual dietary consumption | 446,19 | 88,34 | 29,51 | 149,68 | 31,04 | 14,49 | 151,20 | 166,31 | 74,78 | 102,97 | 53,18 | 385,38 | 33,77 | 40,23 |
| EAT-Lancet diet | 811,00 | 39,00 | 78,00 | 126,00 | 426,00 | 149,00 | 120,00 | 354,00 | 15,00 | 15,00 | 62,00 | 153,00 | 19,00 | 40,00 |
| **FG EnergyΩ SSR (Actual dietary)** | | **2,68** | **3,84** | **1,10** | **0,41** | **0,75** | **1,34** | **4,11** | **0,01** | **1,28** | **1,50** | **0,27** | **1,93** | **1,38** | **0,40** |
| **FG Energy SSR (EAT-Lancet diet)** | | **1,47** | **8,69** | **0,42** | **0,49** | **0,05** | **0,13** | **5,18** | **0,01** | **6,39** | **10,27** | **0,23** | **4,85** | **2,45** | **0,40** |
| **Food diversity index¶ for FG Energy SS** | | **Actual dietary: 9 (14) - 5C & 4A**  **EAT-Lancet diet: 7 (14) - 3C & 4A** | | | | | | | | | | | | | |

* The crop and animal-based food groups; defined in this study for overall produced and consumed food items, were established to assess FSS at the level of food categories. These groups align with the food categories outlined in the EAT-Lancet reference diet, enabling a direct comparison between actual consumption patterns and the recommended healthy dietary guidelines.

§ The actual dietary consumption levels represent the average individual intake calculated for the French population during the years 2014–2015, derived from observed food intake data collected in 2014 **(see Annex 2)**. In this study, these values are assumed to reflect the actual nutrient requirements of the French population during current decade (including 2022 year).

+ The EAT-Lancet reference diet defines recommended quantities of food groups and relevant energy intake to meet the nutritional needs of an average individual, based on health and sustainability indicators **(see Annex 4)**

Ω represented by the self-sufficiency ratio (SSR), was assessed for each food group based on two indicators: quantity and energy supply. In both cases, FSS was calculated using the two level of demand; the actual dietary consumption of the average French individual (§) and the EAT-Lancet recommended diet (+).

¶ The food diversity index is based on a counting approach that quantifies the number of food groups for which France achieves self-sufficiency in terms of quantity and energy. For example, a value of *“9(14)-5C&4A”* indicates that 9 out of 14 food groups meet self-sufficiency thresholds—comprising 5 crop-based and 4 animal-based groups.

**Supplementary results of Table S4: *Food Group Self-Sufficiency on Energy Under Actual French Diets and the EAT-Lancet***

In energy terms **(Table S4)**, current French agricultural production largely exceeds domestic demand for several staple and animal‑source food groups but leaves the country dependent on external supplies for others. When benchmarked against actual diets, cereals, tubers and sugar products show marked energy self‑sufficiency (SSR between 2.7-4.1), and milk, pork, beef and lamb, eggs and nuts also deliver more energy than is currently consumed (SSR > 1). By contrast, domestic production does not cover present energy intakes from fruits, vegetables, poultry, fish and vegetable oils, indicating almost complete reliance on imports for these energy sources.​ Shifting the benchmark to the EAT‑Lancet dietary pattern profoundly alters the picture, revealing strong structural misalignments between France’s production profile and a healthier, more plant‑forward diet. Under this scenario, self‑sufficiency in energy remains high or even increases for sugar products and animal fats and meats; particularly pork and beef and lamb, whose SSRs rise above 6-10 because recommended intakes are much lower than current consumption, whereas it falls well below one for legumes, nuts, fruits, vegetables, poultry and fish.

**Table S5.** Food groups partial self-sufficiency and dietary coverage levels (index) within each specific-nutrients supply-intake context in France food system: the degree to which individual food groups can meet actual consumption requirements within specific-nutrients spectrum, based on observed dietary patterns of the average French individual **(See the quantities of food groups production and consumption for specific-nutrients intake in the “Supplementary results file - France Results”).**

|  | **Food Groups** | **Crop food groups** | | | | | | | **Animal food groups** | | | | | |
| --- | --- | --- | --- | --- | --- | --- | --- | --- | --- | --- | --- | --- | --- | --- |
|  |  | **Cereals** | **Tubers** | **Legumes** | **Fruits** | **Vegetables** | **Nuts** | **Sugar and products** | **Beaf & Lamb & others** | **Poultry meat** | **Pork** | **Dairy product** | **Eggs** | **Fish** |
| **Energy** | **FG partial SS level*** | **2,68** | **3,84** | **1,10** | **0,41** | **0,75** | **1,34** | **4,11** | **1,28** | **0,27** | **1,50** | **1,93** | **1,38** | **0,40** |
| **SS Coverage Index**§ | **9 (14)-5C&4A** | | | | | | | | | | | | |
| **Protein (g)** | **FG partial SS level** | **2,96** | **3,53** | **0,95** | **0,64** | **0,87** | **0,66** | **5,72** | **1,24** | **0,22** | **1,19** | **2,42** | **1,37** | **0,14** |
| **Food diversity index** | **7 (14)-3C&4A** | | | | | | | | | | | | |
| **Carbs (g)** | **FG partial SS level** | **2,32** | **4,06** | **1,06** | **0,37** | **1,27** | **0,88** | **4,10** | **4,92** | **0,40** | **1,34** | **4,38** | **1,91** | **3,85** |
| **Food diversity index** | **10 (14)-5C&5A** | | | | | | | | | | | | |
| **Sugar (g)** | **FG partial SS level** | **6,63** | **3,84** | **1,95** | **0,30** | **1,00** | **0,63** | **4,10** | **2,91** | **0,57** | **1,32** | **3,73** | **1,46** | **-** |
|  | **Food diversity index** | **10 (14)-5C&5A** | | | | | | | | | | | | |
| **Starch (g)** | **FG partial SS level** | **2,31** | **4,01** | **0,57** | **2,50** | **1,15** | **1,00** | **-** | **6,22** | **1,36** | **1,44** | **0,00** | **-** | **6,15** |
| **Food diversity index** | **9 (14)-6C&4A** | | | | | | | | | | | | |
| **Fiber (g)** | **FG partial SS level** | **4,75** | **3,53** | **0,91** | **0,44** | **0,78** | **0,57** | **3,29** | **0,00** | **0,00** | **0,00** | **0,00** | **-** | **2,67** |
| **Food diversity index** | **4 (14)-3C&1A** | | | | | | | | | | | | |
| **Fat (g)** | **FG partial SS level** | **6,04** | **3,32** | **0,67** | **0,26** | **1,06** | **1,51** | **9,93** | **1,30** | **0,34** | **1,69** | **1,35** | **1,73** | **0,73** |
| **Food diversity index** | **9 (14)-5C&4A** | | | | | | | | | | | | |
| **Sat.Fat (g)** | **FG partial SS level** | **5,58** | **2,72** | **0,62** | **0,47** | **0,79** | **1,43** | **5,54** | **1,17** | **0,33** | **1,68** | **1,29** | **1,73** | **1,43** |
| **Food diversity index** | **9 (14)-4C&5A** | | | | | | | | | | | | |
| **Muns.Fat (g)** | **FG partial SS level** | **9,55** | **3,38** | **0,06** | **0,64** | **1,83** | **0,83** | **1,27** | **1,29** | **0,37** | **1,74** | **1,71** | **1,76** | **0,71** |
| **Food diversity index** | **8 (14)-4C&4A** | | | | | | | | | | | | |
| **Puns.Fat (g)** | **FG partial SS level** | **8,08** | **4,34** | **0,28** | **1,07** | **1,04** | **2,83** | **3,53** | **1,60** | **0,37** | **1,68** | **2,03** | **1,86** | **0,45** |
| **Food diversity index** | **10 (14)-6C&4A** | | | | | | | | | | | | |
| **Retinol (mcg)** | **FG partial SS level** | **8,20** | **3,57** | **-** | **0,00** | **0,00** | **-** | **-** | **2,74** | **0,05** | **0,46** | **2,45** | **1,54** | **-** |
| **Food diversity index** | **5 (14)-2C&3A** | | | | | | | | | | | | |
| **BC (mcg)** | **FG partial SS level** | **3,04** | **4,44** | **2,47** | **0,38** | **0,72** | **1,30** | **0,00** | **0,89** | **1,28** | **1,52** | **12,38** | **2,36** | **-** |
| **Food diversity index** | **9 (14)-4C&5A** | | | | | | | | | | | | |
| **Vit.E (mg)** | **FG partial SS level** | **4,27** | **8,99** | **0,64** | **0,30** | **0,66** | **0,52** | **0,00** | **1,60** | **0,41** | **1,75** | **0,97** | **2,00** | **0,42** |
| **Food diversity index** | **6 (14)-2C&4A** | | | | | | | | | | | | |
| **Sodium (mg)** | **FG partial SS level** | **5,53** | **5,46** | **0,63** | **1,23** | **0,97** | **0,47** | **9,21** | **3,01** | **0,28** | **1,68** | **1,59** | **1,19** | **0,50** |
| **Food diversity index** | **9 (14)-5C&4A** | | | | | | | | | | | | |
| **Magnesium (mg)** | **FG partial SS level** | **5,76** | **3,72** | **0,73** | **0,56** | **0,97** | **0,56** | **10,36** | **1,10** | **0,20** | **1,14** | **3,26** | **1,08** | **0,37** |
| **Food diversity index** | **8 (14)-4C&4A** | | | | | | | | | | | | |
| **Phosphorus (mg)** | **FG partial SS level** | **3,86** | **3,53** | **0,89** | **0,57** | **1,03** | **0,62** | **4,60** | **1,30** | **0,20** | **1,19** | **2,90** | **1,21** | **0,23** |
| **Food diversity index** | **8 (14)-4C&4A** | | | | | | | | | | | | |
| **Potassium (mg)** | **FG partial SS level** | **4,06** | **3,54** | **0,99** | **0,45** | **0,92** | **0,64** | **9,57** | **1,17** | **0,20** | **1,19** | **4,27** | **1,43** | **0,26** |
| **Food diversity index** | **8 (14)-4C&4A** | | | | | | | | | | | | |
| **Calcium (mg)** | **FG partial SS level** | **4,40** | **3,61** | **0,59** | **0,29** | **1,09** | **0,51** | **7,39** | **1,45** | **0,36** | **1,54** | **2,83** | **1,32** | **0,81** |
| **Food diversity index** | **8 (14)-4C&4A** | | | | | | | | | | | | |
| **Manganese (mg)** | **FG partial SS level** | **3,95** | **3,98** | **0,75** | **0,57** | **1,01** | **1,10** | **5,01** | **1,56** | **0,77** | **1,14** | **2,73** | **1,51** | **2,64** |
| **Food diversity index** | **10 (14)-5C&5A** | | | | | | | | | | | | |
| **Iron (mg)** | **FG partial SS level** | **3,63** | **4,22** | **0,74** | **0,73** | **1,20** | **0,61** | **11,95** | **1,20** | **0,16** | **1,42** | **1,33** | **1,12** | **0,72** |
| **Food diversity index** | **8 (14)-4C&4A** | | | | | | | | | | | | |
| **Copper (mg)** | **FG partial SS level** | **4,36** | **3,97** | **0,69** | **0,51** | **0,85** | **0,78** | **7,71** | **2,07** | **0,25** | **0,85** | **3,16** | **1,43** | **0,32** |
| **Food diversity index** | **6 (14)-3C&3A** | | | | | | | | | | | | |
| **Zinc (mg)** | **FG partial SS level** | **4,21** | **3,96** | **0,75** | **0,74** | **0,94** | **0,69** | **7,90** | **1,19** | **0,26** | **1,14** | **2,41** | **1,18** | **0,28** |
| **Food diversity index** | **7 (14)-3C&4A** | | | | | | | | | | | | |
| **Selenium (mcg)** | **FG partial SS level** | **5,85** | **3,92** | **1,27** | **0,23** | **0,90** | **0,81** | **1,43** | **1,68** | **0,21** | **1,17** | **3,41** | **2,58** | **0,10** |
| **Food diversity index** | **8 (14)-4C&4A** | | | | | | | | | | | | |
| **Iodine (mcg)** | **FG partial SS level** | **4,67** | **4,03** | **1,78** | **0,18** | **0,93** | **0,90** | **0,76** | **1,17** | **0,32** | **1,60** | **6,30** | **1,93** | **0,18** |
| **Food diversity index** | **7 (14)-3C&4A** | | | | | | | | | | | | |

***** Using a threshold-based sufficiency metric (The ratio of the consumption (or demand) and the production: (x>1) represent a sufficiency level and (x<1) represent an insufficiency level), it quantifies each food group's partial self-sufficiency for achieving nutrient adequacy.

**§** Assesses **dietary coverage index** by counting how many distinct food groups meet sufficiency for each nutrient. The food group coverage index is based on a counting approach that quantifies the number of food groups for which France achieves self-sufficiency in terms of quantity and energy. For example, a value of “9(14)-5C&4A” indicates that 9 out of 14 food groups meet self-sufficiency thresholds—comprising 5 crop-based and 4 animal-based groups.

**(-)** This nutrient is absent or negligible in the composition of the food group.

**Red color:** the main 8 macro and micro-nutrients considered in the results elaborated as **Table (1)** and **Figure ()** in the main text of the article.

Sat.Fat: saturated fat ; Muns.Fat: Monounsaturated fat ; Puns.Fat: Polyunsaturated fat ; BC: Beta-Carotene ; Vit.E: Vitamin E.

**Supplementary results of Table S5: Structure and diversity of food group contributions to nutrient self-sufficiency**

The food diversity assessment indicates that a relatively broad set of food groups contributes to achieving partial self-sufficiency across overall nutrient spectrum, although both the number and composition of these groups vary substantially within each nutrient **(Table S5).** **Energy and carbohydrates** exhibit the highest diversity, with up to ten food groups (out of 14) reaching the sufficiency threshold, reflecting a wide and redundant supply base. In comparison, **protein, fiber and saturated and unsaturated fats** display moderately lower diversity of contributors to partial self-sufficiency, typically supported by around eight groups, indicating reliance on a narrower, though still diversified, set of contributors. For **minerals and trace elements**, diversity generally ranges between eight and ten groups; however, key micronutrients such as **retinol, vitamin E, iodine, copper and** zinc are supported by only a limited (6 to 7 out of 14) subset of food groups, pointing to reduced redundancy and greater structural sensitivity in their supply.

Distinguishing between crop- and animal-based contributions further reveals both strengths and systemic vulnerabilities. **Energy and carbohydrates** are predominantly secured by crop-based groups, notably cereals, tubers and sugar crops, with animal products providing complementary and essential contributions; specifically dairy product based on their contribution in the intake-supply profiles. In contrast, **protein and total fat** rely on a more balanced distribution between plant and animal sources (i.e., with more importance to animal products given by their contributions in the supply-intake profile), enhancing system resilience by enabling partial substitution across production sectors. For several **micronutrients**, however, the structure becomes more polarized: elements such as **magnesium, potassium and manganese** are largely supplied by diverse crop groups (i.e., cereals, tubers, fruits and vegetables), whereas **calcium, iodine and selenium** depend heavily on a smaller number of animal-source foods, particularly dairy products, eggs and fish. This asymmetry underscores a key feature of the French agri-food system: while it is highly resilient for macronutrients due to overlapping and diversified food-group contributions, it remains more exposed for specific micronutrients whose adequacy depends on a limited and less substitutable set of sources.

**Table S6.** France’s regional disparities in nutrient production and nutrient consumption under two intake profiles; actual intake and
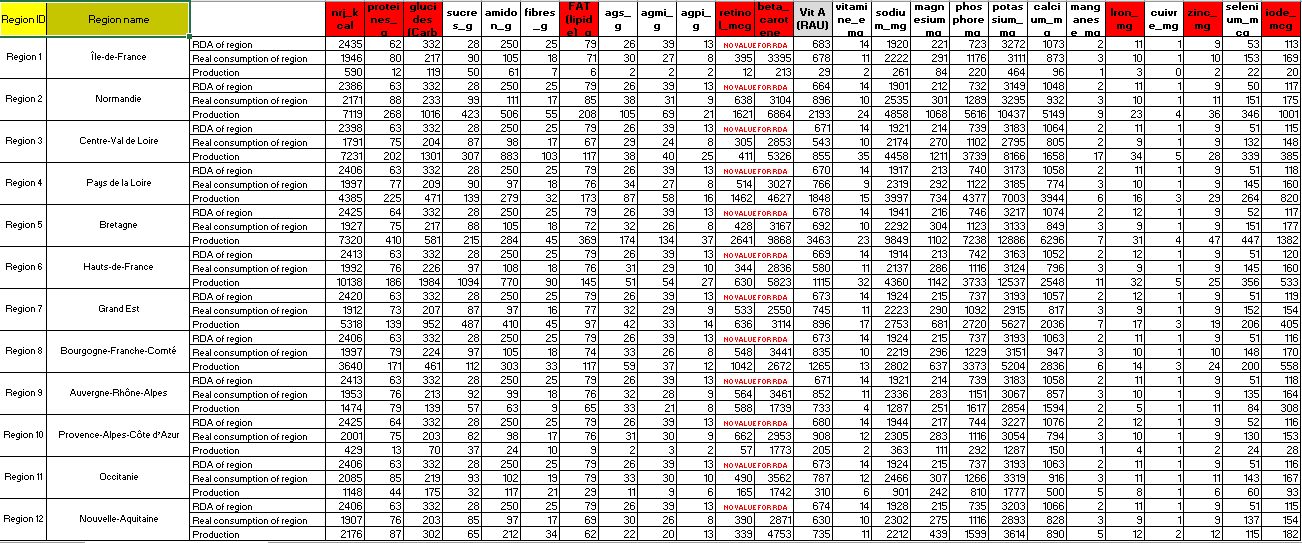
RDAs **(details in Supplementary results file – regions results). Red color for nutrients presented in Figure (5) of the manuscript.**

**NB: As mentioned in the supplementary file “Method overview on RDA”, Retinol and Beta-Carotene have no RDA reference values, but are considered as components of Vitamin (A). For that we have added calculations for Vitamin (A) under both intakes profiles.**

**Supplementary results of Table S6: *Regional Disparities in Production and Consumption and Their Determinants***

Across each of France’s 12 regions, the calculated RDAs recommendations (i.e., healthy diet based on nutrient intake) on energy and nutrients are essentially uniform, reflecting the limited geographic variation in physiological requirements among the population. In contrast, both actual dietary intakes and, more markedly, agricultural production display substantial spatial heterogeneity **(Table S6)**. Regional actual consumption patterns broadly align with RDAs, with energy and most macronutrients only marginally deviating from recommended levels, indicating relatively limited dietary imbalances across territories. In contrast, agricultural production exhibits pronounced spatial heterogeneity: outputs of energy, protein, fats and micronutrients range from levels below local requirements in more urbanized and Mediterranean regions to surpluses exceeding an order of magnitude in the main agricultural basins, underscoring the uneven geographic distribution of productive capacity.

The largest surpluses occur in western and north-eastern regions such as Bretagne, Pays de la Loire, Normandie, Grand Est, Bourgogne-Franche‑Comté and Nouvelle‑Aquitaine, where per-capita output of calories, protein, calcium, phosphorus and several trace elements greatly exceeds both RDAs and actual consumption. These regions combine extensive arable land with dense livestock sectors, including dairy, pigs, poultry and mixed crop-livestock systems, and function as national “breadbaskets” and “livestock belts”. Their high production of cereals, oilseeds, milk and animal products therefore translates into large surpluses of energy and saturated fats, but also minerals. By contrast, more urbanized or structurally less agricultural regions, such as Île‑de‑France and Provence-Alpes-Côte d’Azur, and to a lesser extent Occitanie, show substantially lower per-capita production, in some cases only marginally exceeding local nutrient demand. This pattern reflects both high population densities and competition for land with non-agricultural uses in metropolitan regions, as well as the predominance of specialized, higher-value but less calorie-dense sectors (i.e., cash crops); such as horticulture, wine and olives, in Mediterranean agricultural systems.


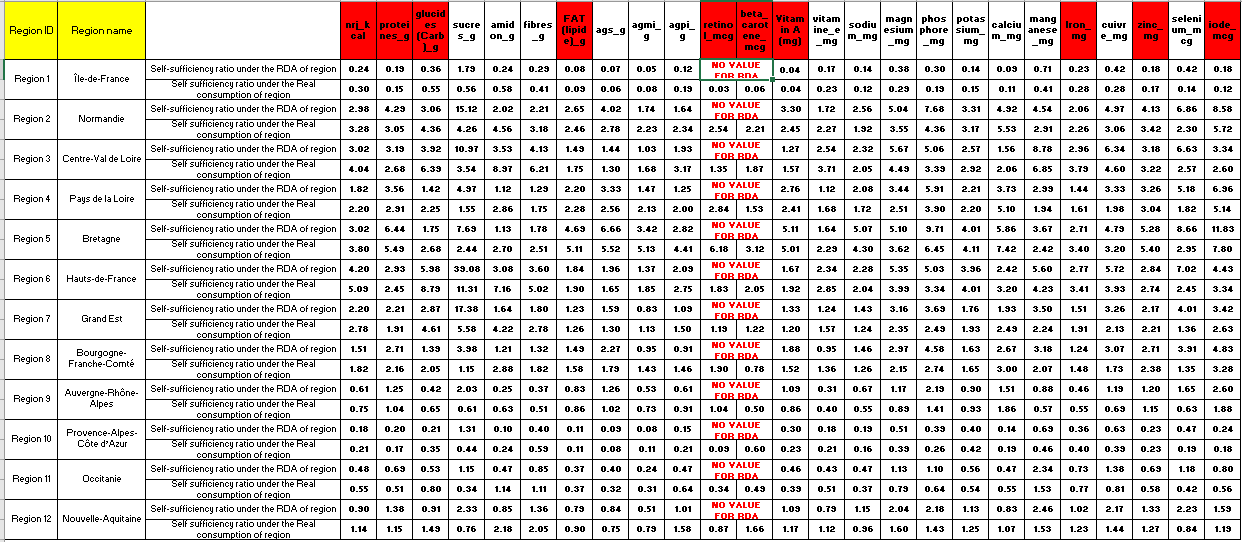
Table S7. France’s regional disparities in nutrient self-sufficiency level across two intake profile; actual intake and RDAs **(details in Supplementary results – regions results). Red color for nutrients presented in Figure (5) of the manuscript.**

**NB: As mentioned in the supplementary file “Method overview on RDA”, Retinol and Beta-Carotene have no RDA reference values, but are considered as components of Vitamin (A). For that, we have added calculations for Vitamin (A) under both intakes profiles.**
