# Supplementary material
Source: Research Square preprint supplement (doi:10.21203/rs.3.rs-10301703/v1)
Supplement: Supplementary file 2 [file 391b321a81a9d8dd76729455.xlsx]

## Sheet: Cereals
nrj_kcal	proteines_g	glucides_g	sucres_g	amidon_g	fibres_g	lipides_g	ags_g	agmi_g	agpi_g	retinol_mcg	beta_carotene_mcg	vitamine_e_mg	sodium_mg	magnesium_mg	phosphore_mg	potassium_mg	calcium_mg	manganese_mg	fer_mg	cuivre_mg	zinc_mg	selenium_mcg	iode_mcg	France_moy	Classification
0.555978	0.0105983	0.116553	0.00105694	0.103812	0.00419879	0.00434358	0.000781844	0.001694	0.001694	0	0.0361965	0.00146234	0.105115	0.231658	0.593622	0.434358	0.0173743	0.00405401	0.00159265	0.000333008	0.00260615	0.0144786	0.0144786	0.144786	Cereals
2.41	0.0697591	0.421172	0.0200192	0.307987	0.0215591	0.0446581	0.00600575	0.0268719	0.0096246	0	0.0977859	0.00800766	3.31086	0.153994	2.15591	0.923961	0.177093	0.0023869	0.00623674	0.000692971	0.0048508	0.0769968	0.0769968	0.769968	Cereals
0.00572327	0.000245764	0.00100157	0.000112445	0.000888791	0.000180115	4.09046e-05	6.90159e-06	7.57492e-06	2.12098e-05	0	8.41658e-05	1.32982e-05	0.000134665	0.00228931	0.0067501	0.00653126	0.000454495	5.01628e-05	7.47392e-05	8.58491e-06	5.52128e-05	0.000215464	0	0.00168332	Cereals
0.333744	0.0125778	0.0622081	0	0.0567592	0.0086274	0.00204333	0.000522185	0.000567592	0.000749221	0	0.00567592	9.08147e-05	0.00567592	0.0635703	0.217955	0.224766	0.0476777	0.00181629	0.00177089	0.000385963	0.00161196	0.0227037	0.0227037	0.227037	Cereals
0.90625	0.0341539	0.16892	0	0.154124	0.0234269	0.00554847	0.00141794	0.00154124	0.00203444	0	0.0154124	0.000246599	0.0154124	0.172619	0.591837	0.610332	0.129464	0.00493197	0.00480867	0.00104804	0.00437713	0.0616497	0.0616497	0.616497	Cereals
0.144423	0.003828	0.0229059	0.001716	0.0138988	0.00200329	0.00375811	0.000861881	0.00125012	0.000714352	0	0.0830822	0.00698046	0.359505	0.0125788	0.0643693	0.0962822	0.0260894	0.000155294	0.000442588	7.7647e-05	0.000543529	0.0077647	0.00673199	0.077647	Cereals
0.513836	0.0168229	0.0661652	0.00703886	0.0591264	0.0221724	0.0151335	0.00175971	0.00443448	0.00827066	0.036954	0.376579	0.0030971	1.65413	0.0570147	0.291761	0.436409	0.118253	0.000703886	0.00200607	0.000351943	0.0024636	0.0351943	0.0305134	0.351943	Cereals
1.54053	0.0328771	0.20102	0.00563608	0.185991	0.00939346	0.0648149	0.0296833	0.0250805	0.00723297	0	0.0469673	0.000375739	0.879228	0.0854805	0.403919	0.24423	0.103328	0.00225443	0.00300591	0.000375739	0.00178476	0.234837	0.0939346	0.939346	Cereals
0.501482	0.0112932	0.111748	0.000394868	0.104245	0.00315894	0.000513328	9.08196e-05	9.47683e-05	0.000244818	0	0.00987169	0.000157947	0.00987169	0.0284305	0.114512	0.0434355	0.0394868	0.00102666	0.000276407	0.000276407	0.00173742	0.0394868	0.0394868	0.394868	Cereals
1.01496	0.0207518	0.21075	0.000646474	0.196528	0.0148689	0.00646474	0.00109901	0.00200407	0.00200407	0	0.0161618	0.000517179	0.0161618	0.316772	0.775769	0.277984	0.0840416	0.00711121	0.00206872	0.000646474	0.00400814	0.0646474	0.0646474	0.646474	Cereals
29.716	0.669194	6.62175	0.0233984	6.17718	0.187187	0.0304179	0.00538163	0.00561562	0.014507	0	0.58496	0.00935936	0.58496	1.68469	6.78554	2.57382	2.33984	0.0608359	0.0163789	0.0163789	0.102953	2.33984	2.33984	23.3984	Cereals
0.0349378	0.00131449	0.00681461	0.000252521	0.00657246	0.000622654	0.000117612	1.695e-05	1.7296e-05	7.2643e-05	0	0.000691838	8.30206e-05	0.00103776	0.0110694	0.0283654	0.0349378	0.00103776	9.68573e-05	0.000207551	4.15103e-05	0.000463532	0.00345919	0.00345919	0.0345919	Cereals
0.471698	0.00954086	0.104362	0.000668128	0.0705543	0.00200438	0.00133626	0.000267251	0.000307339	0.000708215	0	0.00868566	0.00227163	0.0133626	0.181731	0.535838	0.518467	0.0534502	0.0027126	0.00593297	0.00068149	0.00414239	0.0171041	0	0.133626	Cereals
1.9096	0.0697737	0.303752	0.00508876	0.298506	0.0535107	0.0341524	0.00592814	0.010912	0.0131154	0	0	0.00309522	0.0297981	0.776429	2.21387	1.9778	0.44225	0.0247618	0.0212469	0.00157384	0.0174697	0.0160007	0.00262307	0.524614	Cereals
0.19776	0.0037876	0.0408927	0.00046926	0.0403899	0.00636853	0.000737409	0.000155861	9.5528e-05	0.000351945	0	0.00837965	1.67593e-05	0.00502779	0.0368704	0.0905002	0.155861	0.0184352	0.000435742	0.00222899	0.000184352	0.00137426	0.0167593	0.000837965	0.167593	Cereals
0.00899897	0.000172353	0.0018608	2.13535e-05	0.00183793	0.000289797	3.35555e-05	7.09241e-06	4.34696e-06	1.60151e-05	0	0.000381312	7.62625e-07	0.000228787	0.00167777	0.00411817	0.00709241	0.000838887	1.98282e-05	0.000101429	8.38887e-06	6.25352e-05	0.000762625	3.81312e-05	0.00762625	Cereals
0.00988567	0.000301728	0.00192556	1.11751e-05	0.00191696	0.000111751	8.59623e-05	1.46136e-05	1.54732e-05	4.38408e-05	0	0.000171925	1.71925e-06	0.000171925	0.00378234	0.00859623	0.00532966	0.000257887	2.32098e-05	5.41563e-05	1.3754e-05	7.82257e-05	0.000859623	0.000859623	0.00859623	Cereals
0.00232033	8.6521e-05	0.000380823	1.04874e-05	0.000342151	4.58823e-05	3.97865e-05	4.65378e-06	1.05529e-05	2.15647e-05	0	5.24369e-05	1.59933e-05	3.27731e-05	0.00129126	0.00299546	0.00369025	0.000308067	1.33059e-05	2.99546e-05	3.86722e-06	2.03193e-05	8.38991e-05	0	0.000655462	Cereals
1.14424	0.0360281	0.215705	0.00672627	0.187872	0.0293791	0.00850448	0.00108239	0.00239672	0.00432956	0	0.0193284	0.00680359	0.0463881	0.548926	1.39164	1.7009	0.177821	0.00541194	0.0123702	0.00162358	0.00927762	0.0773135	0.0773135	0.773135	Cereals
0.00617887	0.000232864	0.00115171	0	0.00105083	0.000159726	3.78298e-05	9.66763e-06	1.05083e-05	1.38709e-05	0	0.000105083	1.68133e-06	0.000105083	0.00117693	0.00403518	0.00416128	0.000882696	3.36265e-05	3.27859e-05	7.14564e-06	2.98435e-05	0.000420332	0.000420332	0.00420332	Cereals
3.15824	0.0892669	0.637222	0.0148623	0.550835	0.0631649	0.0139334	0.00250802	0.00260091	0.00817428	0	0.0464448	0.00733827	0.0232224	0.678094	2.04357	2.60091	0.250802	0.0204357	0.0204357	0.00260091	0.017649	0.0928896	0.0928896	0.928896	Cereals
3.30255	0.111059	0.632259	0.0172434	0.554322	0.0993688	0.0148079	0.00214325	0.00165615	0.00662459	0	0.00487102	0.0101317	0.136389	0.829048	3.14668	3.96501	0.310771	0.0263035	0.0263035	0.00340971	0.0243551	0.0662459	0.0233809	0.974204	Cereals
317	8.15916	68.3532	0.369233	62.4094	2.25142	0.738467	0.117074	0.0756478	0.297188	0	0.450285	0.387245	35.1222	22.5142	105.367	139.588	15.6699	0.45929	1.06267	0.117074	0.684433	2.48557	2.25142	90.0569	Cereals
2.48653	0.08169	0.458611	0.00931553	0.445712	0.0666419	0.0214974	0.0035829	0.0049444	0.0113936	0	0.0035829	0.00451445	0.0179145	0.659253	2.43637	2.57968	0.22214	0.0179145	0.0214974	0.00300963	0.0200642	0.0716579	0.0716579	0.716579	Cereals
4.92915	0.00585506	1.21459	0	1.18463	0.0108931	0.00340411	0.000122548	0.000217863	0.000340411	0	0	0	0.138888	0.0476575	0.76252	0.0544657	0.0816986	0.00721671	0.00517424	0.000680821	0.0038126	0.038126	0.00816986	1.36164	Cereals
0.103878	0.00222973	0.0216243	0.000263354	0.0204831	0.00096563	0.000731538	0.000134603	0.000283837	0.000269206	0	0	0.000193126	0.000731538	0.0321877	0.0877845	0.0790061	0.00277984	0.000673015	0.000231166	5.26707e-05	0.000409661	0.00292615	0.00292615	0.0292615	Cereals
3.83471	0.0987001	0.826859	0.00446656	0.754958	0.0272351	0.00893313	0.00141623	0.000915101	0.00359504	0	0.00544703	0.00468444	0.424868	0.272351	1.2746	1.68858	0.189557	0.00555597	0.012855	0.00141623	0.00827948	0.0300676	0.0272351	1.08941	Cereals
1.94355	0.0642264	0.382007	0.000167547	0.382007	0.0234566	0.0122309	0.00184302	0.00268075	0.00368604	0	0	0.00178717	0.0938263	0.87683	1.47441	2.17253	0.132921	0.00726037	0.0139623	0.00279245	0.0128453	0.027366	0.0134038	0.55849	Cereals
3.06124	0.0787921	0.66008	0.00356565	0.602681	0.0217418	0.00713129	0.00113057	0.000730523	0.00286991	0	0.00434835	0.00373958	0.339171	0.217418	1.01751	1.34799	0.151323	0.00443532	0.0102621	0.00113057	0.00660949	0.0240029	0.0217418	0.86967	Cereals
0.0076047	0.000195735	0.00163976	8.85774e-06	0.00149717	5.40106e-05	1.77155e-05	2.80855e-06	1.81476e-06	7.1294e-06	0	1.08021e-05	9.28983e-06	0.000842566	0.000540106	0.0025277	0.00334866	0.000375914	1.10182e-05	2.5493e-05	2.80855e-06	1.64192e-05	5.96277e-05	5.40106e-05	0.00216043	Cereals
0.249211	0.00443756	0.054344	0.000321562	0.049199	0.00514499	0.000482343	1.60781e-05	1.60781e-05	1.60781e-05	0	0.0170106	0.000128625	0.00803905	0.0128625	0.0482343	0.0771749	0.0151134	9.64686e-05	0.00067528	0.000225093	0.000353718	0.0321562	0.0321562	0.321562	Cereals
0.222798	0.0122978	0.018846	0.00196445	0.0166899	0.0335394	0.00347373	0.000670789	0.000535034	0.00198841	0	0.00479135	0.00123777	0.0106208	0.436013	0.822515	1.00618	0.0590135	0.0106208	0.0118187	0.000838486	0.0059812	0.0054302	0.00191654	0.0798558	Cereals
0.0523794	0.00230528	0.00744108	0.000325365	0.0071201	0.00243659	0.000945455	0.000169248	0.000347251	0.000404153	0	0	0.000147363	0.000948373	0.0342873	0.0914816	0.0825814	0.00913357	0.000821437	0.000789338	5.83614e-05	0.00045376	0.00659484	0.000350169	0.0145904	Cereals
0.455746	0.0117303	0.0982703	0.000530841	0.089725	0.00323683	0.00106168	0.000168315	0.000108758	0.000427262	0	0.000647367	0.000556735	0.0504946	0.0323683	0.151484	0.200684	0.0225284	0.000660314	0.00152779	0.000168315	0.000983998	0.00357346	0.00323683	0.129473	Cereals
0.0909095	0.0067194	0.00867098	0.00247037	0.00439725	0.0040267	0.00234685	0.000452077	0.000375496	0.00141305	0	0.00553362	0.00251977	0.00177866	0.0617592	0.247037	0.244566	0.01334	0.00419962	0.00219863	0.000192689	0.00345851	0.00247037	0.00247037	0.0247037	Cereals
10.2204	0.298751	2.03098	0.104825	1.70995	0.150686	0.0655155	0.0163789	0.0163789	0.0275165	0	0.897563	0.00262062	0.163789	1.24479	4.78263	7.20671	0.982733	0.0203098	0.0347232	0.0104825	0.0373438	0.655155	0.655155	6.55155	Cereals
0.310946	0.0105439	0.0613412	0	0.0520128	0.00621892	0.00141339	0.000310946	0.000197875	0.000678428	0	0.00706696	0.000113071	0.0197875	0.0621892	0.186568	0.268544	0.0395749	0.00130032	0.00155473	0.000452285	0.00206355	0.0282678	0.0282678	0.282678	Cereals
47.9822	1.53159	9.59643	0.230314	8.3297	0.729329	0.211121	0.0422243	0.0333956	0.0767714	0	0.959643	0.0153543	0.959643	6.52557	22.6476	13.0511	6.52557	0.118996	0.165059	0.0460629	0.180413	3.83857	3.83857	38.3857	Cereals
0.0091539	0.000174602	0.00194379	2.76877e-05	0.00192119	5.65056e-05	6.21561e-05	1.63866e-05	1.86468e-05	2.14721e-05	0	0.000141264	2.26022e-06	0.000333383	0.00129963	0.00350335	0.00180818	0.000542454	1.92119e-05	2.71227e-05	3.95539e-06	2.59926e-05	0.000565056	0.000565056	0.00565056	Cereals
0.875291	0.0313588	0.161274	0.00413523	0.148868	0.0227438	0.00620285	0.000682313	0.000516904	0.00144733	0	0.0172301	0.000275682	0.0172301	0.248114	0.758126	0.447983	0.151625	0.00523796	0.00675421	0.00130949	0.00682313	0.0689205	0.0689205	0.689205	Cereals
0.796337	0.0127807	0.179645	0.000893757	0.172495	0.00223439	0.00223439	4.46878e-05	4.46878e-05	4.46878e-05	0	0	0.000268127	0.0849069	0.0116188	0.116188	0.0196627	0.0464754	0.000446878	0.000715006	0.000268127	0.00134064	0.0893757	0.0893757	0.893757	Cereals
2.71798	0.0723086	0.4718	0.132309	0.335901	0.0794881	0.0430774	0.00666675	0.00692316	0.0120514	0	0.564109	0.00743599	6.05135	0.689752	1.3795	5.74366	0.0900011	0.00282055	0.00897447	0.000923088	0.0100001	0.128207	0.0128207	2.56413	Cereals
0.643804	0.0193493	0.102024	0.00323661	0.0988574	0.0186457	0.0135445	0.00239228	0.00395781	0.00341252	0	0	0.00263854	0.00703611	0.182939	0.680744	0.571684	0.0879514	0.0047142	0.00668431	0.00061566	0.00457347	0.00295517	0	0.175903	Cereals
0.311165	0.00800897	0.067095	0.000362437	0.0612606	0.00220998	0.000724873	0.000114919	7.42553e-05	0.000291717	0	0.000441996	0.000380116	0.0344757	0.0220998	0.103427	0.137019	0.0153815	0.000450836	0.00104311	0.000114919	0.000671834	0.00243982	0.00220998	0.0883992	Cereals
nrj_kcal	proteines_g	glucides_g	sucres_g	amidon_g	fibres_g	lipides_g	ags_g	agmi_g	agpi_g	retinol_mcg	beta_carotene_mcg	vitamine_e_mg	sodium_mg	magnesium_mg	phosphore_mg	potassium_mg	calcium_mg	manganese_mg	fer_mg	cuivre_mg	zinc_mg	selenium_mcg	iode_mcg	France_moy
446.195	11.7169	94.7292	0.974111	85.9543	4.01421	1.39614	0.255364	0.235501	0.526403	0.036954	4.29974	0.495921	50.7457	40.0653	165.914	193.419	28.8496	0.838626	1.49683	0.218599	1.19287	10.7342	10.0854	176.018
1829.85	77.2374	203.872	81.6271	101.912	17.4549	73.5689	31.4976	27.4542	8.48091	468.114	2950.69	10.0805	2231.03	260.184	1133.39	2966.4	719.748	2.88921	8.90985	1.18413	9.25299	122.133	159.071	1586.38
24.3842	15.1699	46.465	1.19337	84.342	22.9976	1.89774	0.81074	0.857797	6.20692	0.00789423	0.14572	4.91959	2.27454	15.3988	14.6387	6.52034	4.0083	29.0261	16.7997	18.4607	12.8917	8.78895	6.34021	11.0955

## Sheet: Wheat
nrj_kcal	proteines_g	glucides_g	sucres_g	amidon_g	fibres_g	lipides_g	ags_g	agmi_g	agpi_g	retinol_mcg	beta_carotene_mcg	vitamine_e_mg	sodium_mg	magnesium_mg	phosphore_mg	potassium_mg	calcium_mg	manganese_mg	fer_mg	cuivre_mg	zinc_mg	selenium_mcg	iode_mcg	France_moy	produit_fao_v2
0.333744	0.0125778	0.0622081	0	0.0567592	0.0086274	0.00204333	0.000522185	0.000567592	0.000749221	0	0.00567592	9.08147e-05	0.00567592	0.0635703	0.217955	0.224766	0.0476777	0.00181629	0.00177089	0.000385963	0.00161196	0.0227037	0.0227037	0.227037	Blé et produits
0.90625	0.0341539	0.16892	0	0.154124	0.0234269	0.00554847	0.00141794	0.00154124	0.00203444	0	0.0154124	0.000246599	0.0154124	0.172619	0.591837	0.610332	0.129464	0.00493197	0.00480867	0.00104804	0.00437713	0.0616497	0.0616497	0.616497	Blé et produits
0.144423	0.003828	0.0229059	0.001716	0.0138988	0.00200329	0.00375811	0.000861881	0.00125012	0.000714352	0	0.0830822	0.00698046	0.359505	0.0125788	0.0643693	0.0962822	0.0260894	0.000155294	0.000442588	7.7647e-05	0.000543529	0.0077647	0.00673199	0.077647	Blé et produits
0.513836	0.0168229	0.0661652	0.00703886	0.0591264	0.0221724	0.0151335	0.00175971	0.00443448	0.00827066	0.036954	0.376579	0.0030971	1.65413	0.0570147	0.291761	0.436409	0.118253	0.000703886	0.00200607	0.000351943	0.0024636	0.0351943	0.0305134	0.351943	Blé et produits
1.54053	0.0328771	0.20102	0.00563608	0.185991	0.00939346	0.0648149	0.0296833	0.0250805	0.00723297	0	0.0469673	0.000375739	0.879228	0.0854805	0.403919	0.24423	0.103328	0.00225443	0.00300591	0.000375739	0.00178476	0.234837	0.0939346	0.939346	Blé et produits
3.15824	0.0892669	0.637222	0.0148623	0.550835	0.0631649	0.0139334	0.00250802	0.00260091	0.00817428	0	0.0464448	0.00733827	0.0232224	0.678094	2.04357	2.60091	0.250802	0.0204357	0.0204357	0.00260091	0.017649	0.0928896	0.0928896	0.928896	Blé et produits
3.30255	0.111059	0.632259	0.0172434	0.554322	0.0993688	0.0148079	0.00214325	0.00165615	0.00662459	0	0.00487102	0.0101317	0.136389	0.829048	3.14668	3.96501	0.310771	0.0263035	0.0263035	0.00340971	0.0243551	0.0662459	0.0233809	0.974204	Blé et produits
317	8.15916	68.3532	0.369233	62.4094	2.25142	0.738467	0.117074	0.0756478	0.297188	0	0.450285	0.387245	35.1222	22.5142	105.367	139.588	15.6699	0.45929	1.06267	0.117074	0.684433	2.48557	2.25142	90.0569	Blé et produits
1.94355	0.0642264	0.382007	0.000167547	0.382007	0.0234566	0.0122309	0.00184302	0.00268075	0.00368604	0	0	0.00178717	0.0938263	0.87683	1.47441	2.17253	0.132921	0.00726037	0.0139623	0.00279245	0.0128453	0.027366	0.0134038	0.55849	Blé et produits
0.222798	0.0122978	0.018846	0.00196445	0.0166899	0.0335394	0.00347373	0.000670789	0.000535034	0.00198841	0	0.00479135	0.00123777	0.0106208	0.436013	0.822515	1.00618	0.0590135	0.0106208	0.0118187	0.000838486	0.0059812	0.0054302	0.00191654	0.0798558	Blé et produits
0.0909095	0.0067194	0.00867098	0.00247037	0.00439725	0.0040267	0.00234685	0.000452077	0.000375496	0.00141305	0	0.00553362	0.00251977	0.00177866	0.0617592	0.247037	0.244566	0.01334	0.00419962	0.00219863	0.000192689	0.00345851	0.00247037	0.00247037	0.0247037	Blé et produits
47.9822	1.53159	9.59643	0.230314	8.3297	0.729329	0.211121	0.0422243	0.0333956	0.0767714	0	0.959643	0.0153543	0.959643	6.52557	22.6476	13.0511	6.52557	0.118996	0.165059	0.0460629	0.180413	3.83857	3.83857	38.3857	Blé et produits
0.0091539	0.000174602	0.00194379	2.76877e-05	0.00192119	5.65056e-05	6.21561e-05	1.63866e-05	1.86468e-05	2.14721e-05	0	0.000141264	2.26022e-06	0.000333383	0.00129963	0.00350335	0.00180818	0.000542454	1.92119e-05	2.71227e-05	3.95539e-06	2.59926e-05	0.000565056	0.000565056	0.00565056	Blé et produits
0.875291	0.0313588	0.161274	0.00413523	0.148868	0.0227438	0.00620285	0.000682313	0.000516904	0.00144733	0	0.0172301	0.000275682	0.0172301	0.248114	0.758126	0.447983	0.151625	0.00523796	0.00675421	0.00130949	0.00682313	0.0689205	0.0689205	0.689205	Blé et produits
nrj_kcal	proteines_g	glucides_g	sucres_g	amidon_g	fibres_g	lipides_g	ags_g	agmi_g	agpi_g	retinol_mcg	beta_carotene_mcg	vitamine_e_mg	sodium_mg	magnesium_mg	phosphore_mg	potassium_mg	calcium_mg	manganese_mg	fer_mg	cuivre_mg	zinc_mg	selenium_mcg	iode_mcg	France_moy
378.024	10.1061	80.3131	0.65481	72.8681	3.29273	1.09394	0.201859	0.150301	0.416316	0.036954	2.01666	0.436682	39.2792	32.5622	138.08	164.69	23.5393	0.662225	1.32126	0.176524	0.946765	6.95018	6.50908	133.916
1829.85	77.2374	203.872	81.6271	101.912	17.4549	73.5689	31.4976	27.4542	8.48091	468.114	2950.69	10.0805	2231.03	260.184	1133.39	2966.4	719.748	2.88921	8.90985	1.18413	9.25299	122.133	159.071	1586.38
20.6587	13.0845	39.3939	0.802196	71.5013	18.8642	1.48697	0.640872	0.547462	4.90886	0.00789423	0.0683453	4.33194	1.76058	12.5151	12.1829	5.55186	3.27049	22.9206	14.8293	14.9075	10.232	5.69068	4.09193	8.44159

## Sheet: Maize
nrj_kcal	proteines_g	glucides_g	sucres_g	amidon_g	fibres_g	lipides_g	ags_g	agmi_g	agpi_g	retinol_mcg	beta_carotene_mcg	vitamine_e_mg	sodium_mg	magnesium_mg	phosphore_mg	potassium_mg	calcium_mg	manganese_mg	fer_mg	cuivre_mg	zinc_mg	selenium_mcg	iode_mcg	France_moy	produit_fao_v2
4.92915	0.00585506	1.21459	0	1.18463	0.0108931	0.00340411	0.000122548	0.000217863	0.000340411	0	0	0	0.138888	0.0476575	0.76252	0.0544657	0.0816986	0.00721671	0.00517424	0.000680821	0.0038126	0.038126	0.00816986	1.36164	Maïs et produits
2.71798	0.0723086	0.4718	0.132309	0.335901	0.0794881	0.0430774	0.00666675	0.00692316	0.0120514	0	0.564109	0.00743599	6.05135	0.689752	1.3795	5.74366	0.0900011	0.00282055	0.00897447	0.000923088	0.0100001	0.128207	0.0128207	2.56413	Maïs et produits
nrj_kcal	proteines_g	glucides_g	sucres_g	amidon_g	fibres_g	lipides_g	ags_g	agmi_g	agpi_g	retinol_mcg	beta_carotene_mcg	vitamine_e_mg	sodium_mg	magnesium_mg	phosphore_mg	potassium_mg	calcium_mg	manganese_mg	fer_mg	cuivre_mg	zinc_mg	selenium_mcg	iode_mcg	France_moy
7.64713	0.0781636	1.68639	0.132309	1.52053	0.0903813	0.0464815	0.00678929	0.00714102	0.0123918	0	0.564109	0.00743599	6.19024	0.737409	2.14202	5.79812	0.1717	0.0100373	0.0141487	0.00160391	0.0138127	0.166333	0.0209905	3.92578
1829.85	77.2374	203.872	81.6271	101.912	17.4549	73.5689	31.4976	27.4542	8.48091	468.114	2950.69	10.0805	2231.03	260.184	1133.39	2966.4	719.748	2.88921	8.90985	1.18413	9.25299	122.133	159.071	1586.38
0.41791	0.101199	0.827179	0.16209	1.49201	0.517798	0.063181	0.021555	0.0260107	0.146115	0	0.0191179	0.0737658	0.277461	0.283418	0.188992	0.19546	0.0238555	0.347405	0.158799	0.13545	0.149278	0.13619	0.0131957	0.247467

## Sheet: Rice
nrj_kcal	proteines_g	glucides_g	sucres_g	amidon_g	fibres_g	lipides_g	ags_g	agmi_g	agpi_g	retinol_mcg	beta_carotene_mcg	vitamine_e_mg	sodium_mg	magnesium_mg	phosphore_mg	potassium_mg	calcium_mg	manganese_mg	fer_mg	cuivre_mg	zinc_mg	selenium_mcg	iode_mcg	France_moy	produit_fao_v2
0.555978	0.0105983	0.116553	0.00105694	0.103812	0.00419879	0.00434358	0.000781844	0.001694	0.001694	0	0.0361965	0.00146234	0.105115	0.231658	0.593622	0.434358	0.0173743	0.00405401	0.00159265	0.000333008	0.00260615	0.0144786	0.0144786	0.144786	Riz et produits
0.501482	0.0112932	0.111748	0.000394868	0.104245	0.00315894	0.000513328	9.08196e-05	9.47683e-05	0.000244818	0	0.00987169	0.000157947	0.00987169	0.0284305	0.114512	0.0434355	0.0394868	0.00102666	0.000276407	0.000276407	0.00173742	0.0394868	0.0394868	0.394868	Riz et produits
1.01496	0.0207518	0.21075	0.000646474	0.196528	0.0148689	0.00646474	0.00109901	0.00200407	0.00200407	0	0.0161618	0.000517179	0.0161618	0.316772	0.775769	0.277984	0.0840416	0.00711121	0.00206872	0.000646474	0.00400814	0.0646474	0.0646474	0.646474	Riz et produits
29.716	0.669194	6.62175	0.0233984	6.17718	0.187187	0.0304179	0.00538163	0.00561562	0.014507	0	0.58496	0.00935936	0.58496	1.68469	6.78554	2.57382	2.33984	0.0608359	0.0163789	0.0163789	0.102953	2.33984	2.33984	23.3984	Riz et produits
0.0349378	0.00131449	0.00681461	0.000252521	0.00657246	0.000622654	0.000117612	1.695e-05	1.7296e-05	7.2643e-05	0	0.000691838	8.30206e-05	0.00103776	0.0110694	0.0283654	0.0349378	0.00103776	9.68573e-05	0.000207551	4.15103e-05	0.000463532	0.00345919	0.00345919	0.0345919	Riz et produits
0.471698	0.00954086	0.104362	0.000668128	0.0705543	0.00200438	0.00133626	0.000267251	0.000307339	0.000708215	0	0.00868566	0.00227163	0.0133626	0.181731	0.535838	0.518467	0.0534502	0.0027126	0.00593297	0.00068149	0.00414239	0.0171041	0	0.133626	Riz et produits
0.103878	0.00222973	0.0216243	0.000263354	0.0204831	0.00096563	0.000731538	0.000134603	0.000283837	0.000269206	0	0	0.000193126	0.000731538	0.0321877	0.0877845	0.0790061	0.00277984	0.000673015	0.000231166	5.26707e-05	0.000409661	0.00292615	0.00292615	0.0292615	Riz et produits
0.455746	0.0117303	0.0982703	0.000530841	0.089725	0.00323683	0.00106168	0.000168315	0.000108758	0.000427262	0	0.000647367	0.000556735	0.0504946	0.0323683	0.151484	0.200684	0.0225284	0.000660314	0.00152779	0.000168315	0.000983998	0.00357346	0.00323683	0.129473	Riz et produits
0.796337	0.0127807	0.179645	0.000893757	0.172495	0.00223439	0.00223439	4.46878e-05	4.46878e-05	4.46878e-05	0	0	0.000268127	0.0849069	0.0116188	0.116188	0.0196627	0.0464754	0.000446878	0.000715006	0.000268127	0.00134064	0.0893757	0.0893757	0.893757	Riz et produits
0.311165	0.00800897	0.067095	0.000362437	0.0612606	0.00220998	0.000724873	0.000114919	7.42553e-05	0.000291717	0	0.000441996	0.000380116	0.0344757	0.0220998	0.103427	0.137019	0.0153815	0.000450836	0.00104311	0.000114919	0.000671834	0.00243982	0.00220998	0.0883992	Riz et produits
nrj_kcal	proteines_g	glucides_g	sucres_g	amidon_g	fibres_g	lipides_g	ags_g	agmi_g	agpi_g	retinol_mcg	beta_carotene_mcg	vitamine_e_mg	sodium_mg	magnesium_mg	phosphore_mg	potassium_mg	calcium_mg	manganese_mg	fer_mg	cuivre_mg	zinc_mg	selenium_mcg	iode_mcg	France_moy
33.9622	0.757443	7.53861	0.0284677	7.00285	0.220688	0.0479459	0.00810003	0.0102446	0.0202636	0	0.657657	0.0152496	0.901117	2.55262	9.29253	4.31938	2.6224	0.0780682	0.0299742	0.0189618	0.119317	2.57733	2.55966	25.8936
1829.85	77.2374	203.872	81.6271	101.912	17.4549	73.5689	31.4976	27.4542	8.48091	468.114	2950.69	10.0805	2231.03	260.184	1133.39	2966.4	719.748	2.88921	8.90985	1.18413	9.25299	122.133	159.071	1586.38
1.85601	0.980668	3.69772	0.0348753	6.8715	1.26433	0.0651715	0.0257164	0.0373153	0.238932	0	0.0222882	0.151278	0.0403901	0.981082	0.819886	0.14561	0.364349	2.70206	0.336417	1.60133	1.28949	2.11027	1.60913	1.63224

## Sheet: V&T&F
nrj_kcal	proteines_g	glucides_g	sucres_g	amidon_g	fibres_g	lipides_g	ags_g	agmi_g	agpi_g	retinol_mcg	beta_carotene_mcg	vitamine_e_mg	sodium_mg	magnesium_mg	phosphore_mg	potassium_mg	calcium_mg	manganese_mg	fer_mg	cuivre_mg	zinc_mg	selenium_mcg	iode_mcg	France_moy	produit_fao_v2	Classification
0.258131	0.00202359	0.0587335	0.0587335	0	0.000888407	0.000473817	0.000217166	3.99783e-05	0.00012339	0	0.0148068	9.87118e-05	0.0228024	0.0839051	0.0450126	0.710725	0.070579	0.00720596	0.000740339	0.000148068	0.000325749	0.024678	0.00493559	0.493559	Ananas et produits	Fruits
0.125248	0.00131149	0.0214757	0.0195085	0	0.00108198	0.000327873	0.000121313	8.19683e-06	0.000134428	0	30.4922	0.00380333	0.139346	0.0286889	0.0839356	0.688534	0.0445908	0.00023279	0.00150822	0.000167215	0.000281971	0.00360661	0.00655747	0.327873	Carottes et navets	Vegetables
0.286905	0.00488138	0.0240084	0.0205217	0	0.0029886	0.00239088	0.00039848	5.97719e-05	0.000209202	0	0.00996199	0.000946389	0.0261004	0.0596723	0.144449	1.31498	0.123529	7.96959e-05	0.00239088	0.000418404	0.000488138	0.0109582	0.00597719	0.996199	Citrons & Limes et produits	Fruits
0.173324	0.00162898	0.041702	0.0364892	0	0	0	0	0	0	0	0.244348	0.00325797	0.00651593	0.0270737	0.0355118	0.430052	0.041702	0.000114029	0.000325797	0.000140093	0.000110771	0.00117287	0.0176908	0.325797		Fruits
3.59029	0.0496027	0.755063	0.755063	0	0.0196836	0.0102355	0.00267697	0.00236203	0.0027557	0	0.834585	0.0118102	0.270846	0.858205	1.33061	12.1251	0.570824	0.00157469	0.00629875	0.00181089	0.00173216	0.393672	0.0314938	7.87344	Oranges	Fruits
1.74883	0.0272041	0.365312	0.326449	0	0.0077726	0.0077726	0.000932712	0.00139907	0.00155452	0	1.28248	0.00155452	0.0217633	0.512991	0.660671	7.7726	0.408061	0.000854986	0.00307018	0.000971575	0.0010493	0.194315	0.038863	3.8863	Oranges	Fruits
0.451531	0.00223438	0.105202	0.100547	0	0.00279297	0.000912371	0.000307227	5.58595e-05	0.000493425	0	0.0393809	9.30991e-05	0.0370534	0.0658211	0.0558595	1.19167	0.0600489	0.000242058	0.000791342	0.000102409	9.30991e-05	0.0465496	0.00651694	0.930991	Pommes	Fruits
0.288215	0.00366434	0.0592637	0.0592637	0	0.00147983	0.000704681	0.000387575	5.98979e-05	0.000112749	0	0.0211404	0.000281873	0.0279758	0.0557403	0.0880852	0.810383	0.0746962	0.000112749	0.00105702	0.000218451	0.000260732	0.00775149	0.00422809	0.704681	Pamplemousses et pomelos	Fruits
0.365258	0.00131957	0.0860362	0.0844527	0	0.000738961	0.000300863	0.000163627	1.58349e-05	0.000116122	0	0.0263915	0.00211132	0.0201103	0.0440737	0.0659787	0.601725	0.043757	0.000469768	0.0024808	0.000163627	0.000295584	0.0263915	0.00263915	0.527829	Jus de raisin	Fruits
0.0900509	0.00024382	0.0211311	0.0206434	0	0.000162547	0.000471386	0.000125161	9.59026e-05	8.12734e-05	0	0	0.000617678	0.0146292	0.0113783	0.0178801	0.34785	0.0178801	0.000154419	0.000162547	3.41348e-05	0.000146292	0.00495768	0.00162547	0.162547		Fruits
0.0205957	9.8328e-05	0.00496955	0.00358764	0	0.000119588	1.03643e-05	7.97254e-07	5.58078e-06	1.86026e-06	0	0.000531503	3.18902e-05	0.00265751	0.00372052	0.00664379	0.0733474	0.00318902	3.98627e-05	0.000313587	1.80711e-05	5.58078e-05	0.000810542	0.000265751	0.0265751	Prunes et prunelles	Fruits
0.18874	0.000850426	0.0438929	0.0438929	0	0.000411496	0.000301764	0.000150882	2.27695e-05	6.58394e-05	0	0.00685827	0.00183802	0.00776356	0.0213978	0.0466363	0.170085	0.0438929	0.000164599	0.00117962	1.37165e-05	6.85827e-05	0.0274331	0.0274331	0.274331	Jus de raisin	Fruits
0.0838571	0.000311798	0.0155899	0.0152617	0.000328208	0	0	0	0	0	0	0.61539	0.00172309	0.00653134	0.0234669	0.020513	0.219899	0.017395	3.28208e-05	0.000246156	3.28208e-05	3.28208e-05	0.000164104	0.00492312	0.164104	Mangues, mangoustans et goyaves	Fruits
0.0909296	0.00104277	0.0189784	0.0189784	0	0.000208554	0.000208554	2.91976e-05	2.7112e-05	5.0053e-05	0	0.00834216	0.000458819	0.00208554	0.0250265	0.0312831	0.337858	0.0187699	4.17108e-05	0.000417108	6.88228e-05	0.000104277	0.0063609	0.00125132	0.208554	Pamplemousses et pomelos	Fruits
0.441507	0.00509032	0.0923529	0.0923529	0	0.00155826	0.000862237	0.00045709	5.71362e-05	0.000176603	0	2.25428	0.0019738	0.0316846	0.0896519	0.155826	1.32972	0.050176	0.00051942	0.00155826	0.00051942	0.00051942	0.0316846	0.0103884	1.03884	Pamplemousses et pomelos	Fruits
0.129594	0.00176318	0.0268885	0.0105791	0	0.00176318	0.0012783	0.000167502	4.84874e-05	0.000374675	0	0.00881589	0.000661192	0.0925668	0.0352635	0.0396715	0.44961	0.0484874	8.81589e-05	0.000573033	0.000163094	0.000264477	0.0134442	0.00440794	0.440794	Citrons & Limes et produits	Fruits
0.00286439	4.17724e-05	0.000168084	0.000168084	0	3.97832e-05	6.96206e-06	7.95664e-07	7.95664e-07	2.28754e-06	0	0.00298374	2.18808e-05	0.000198916	0.000795664	0.00139241	0.0116366	0.00139241	1.79024e-06	8.95122e-06	2.68537e-06	7.95664e-06	0.000303347	9.9458e-05	0.0099458	Citrons & Limes et produits	Fruits
0.00125626	1.31408e-05	6.51786e-05	6.51786e-05	0	2.36535e-05	1.20896e-05	1.36665e-06	1.15639e-06	3.36406e-06	0	0.000525634	6.3076e-06	0.000551915	0.000367944	0.000525634	0.00394225	0.00063076	4.20507e-07	1.20896e-05	1.5769e-06	3.1538e-06	0.000160318	6.3076e-05	0.00525634	Citrons & Limes et produits	Fruits
0.232564	0.00327276	0.0525625	0.0495873	0	0.000743809	0.000694222	0.000213225	0.000148762	0.000173555	0	0.148762	0.000446285	0.0187936	0.0461162	0.0793396	0.609923	0.0138844	0.000247936	0.00148762	0.000247936	0.000247936	0.00247936	0.00495873	0.495873	Tangerines, mandarines, clémentines	Fruits
1.69439	0.00866253	0.388081	0.349966	0.00519752	0.00866253	0.00519752	0.000173251	0.000173251	0.000173251	0	2.9418	0.00693002	0.0318781	0.242551	0.346501	4.85102	0.187111	0.00311851	0.00277201	0.0010395	0.000866253	0.346501	0.346501	3.46501		Fruits
0.479654	0.00172183	0.112329	0.0901913	0	0.000655937	0.000245976	4.0996e-05	0.00010659	4.83753e-05	0	6.44458	0.00254175	0.0137747	0.0432918	0.0737929	0.93471	0.0942909	0.000180383	0.0031157	0.000319769	0.00040996	0.00901913	0.00163984	0.819921	Abricots	Fruits
0.0473086	0.00191851	0.00811005	0.00811005	0	0.000872048	0.000305217	7.63042e-05	2.39813e-05	7.1944e-05	0	0.313937	0.000763042	0.381521	0.0285596	0.0475266	0.616974	0.014258	0.000152608	0.000675837	0.000132987	0.000305217	0.00152608	0.000654036	0.218012	Jus de tomates	Fruits
0.0844015	0.000256992	0.0200183	0.0154195	0	0.000608665	5.81613e-05	1.35259e-06	4.05777e-06	4.05777e-06	0	0.00135259	6.76294e-05	0.00175837	0.00405777	0.00405777	0.0175837	0.00676294	4.05777e-05	0.000351673	9.06234e-05	9.46812e-05	0.00148785	0.000946812	0.135259	Poires	Fruits
0.0654971	0.000866873	0.0122004	0.00481596	0	0.000866873	0.000642128	7.38447e-05	2.27955e-05	0.000166953	0	0.00481596	0.0003018	0.113015	0.0475175	0.0211902	0.263273	0.237587	7.06341e-05	0.00118794	0.000577915	0.000545809	0.0240798	0.00513703	3.21064	Citrons & Limes et produits	Fruits
0.400298	0.00241628	0.0926242	0.088597	0	0.00241628	0.000716831	0.000104706	0	0	0.966513	0.210217	0.00781265	0.0276262	0.0430904	0.0496949	0.703944	0.0738577	0.000402714	0	0.000402714	0	0.00241628	0.0805428	0.805428		Fruits
2.41851	0.0254066	0.547219	0.527676	0	0.0302925	0.00732883	0.00102604	0	0	0	21.9376	0.0258952	0.41872	0.400643	0.591192	7.23111	0.542333	0.00977177	0.00488589	0.00244294	0.00244294	0.0244294	0.488589	4.88589		Fruits
12.0869	0.162401	2.55848	2.55848	0	0.0745446	0.0292854	0.0141102	0.00372723	0.00505839	0	6.97525	0.0532462	1.28057	2.66231	4.39281	43.9281	0.109155	0.00559085	0.0181037	0.00585708	0.0119804	0.812004	0.186362	26.6231	Oranges	Fruits
0.472041	0.00365854	0.107972	0.107972	0	0.00196312	0.000660322	0.000276621	8.92327e-05	0.000267698	0	0.0624629	0.000178465	0.046401	0.121356	0.087448	1.19572	0.0721	0.0107079	0.00160619	0.000356931	0.000651399	0.0098156	0.00892327	0.892327	Ananas et produits	Fruits
1.81924	0.00632454	0.424116	0.405515	0	0.00855673	0.00520845	0.00171135	0.000223219	0.00145092	0	0.260422	0.000372032	0.494802	0.169647	0.245169	4.20396	0.160718	0.00186016	0.011161	0.00186016	0.00186016	0.00372032	0.0372032	3.72032	Pommes	Fruits
0.0164172	7.24288e-05	0.00366972	0.00313858	0	0	2.41429e-05	0	0	0	0	0.0241429	0	0.000724288	0.000917431	0.00123129	0.017576	0.00041043	7.24288e-06	3.38001e-05	4.82858e-06	4.82858e-06	2.41429e-05	0.000265572	0.0241429		Fruits
0.0175936	5.15292e-05	0.00415914	0.00366962	0	5.15292e-05	5.88905e-05	1.84033e-06	0	0	0	0.0610989	9.93778e-05	0.000743493	0.000956971	0.0016563	0.022452	0.00287091	1.1042e-05	2.57646e-05	7.36132e-06	9.20165e-06	0.00368066	0.00368066	0.0368066	Mangues, mangoustans et goyaves	Fruits
0.015779	6.15166e-05	0.00378327	0.00356796	0	4.61375e-05	2.55294e-05	1.78398e-05	8.91991e-07	8.91991e-07	0	0.241145	8.30474e-05	0.00141181	0.00113806	0.00116882	0.0119957	0.00249142	9.22749e-06	2.46066e-05	6.15166e-06	7.68958e-06	0.00307583	0.00307583	0.0307583	Mangues, mangoustans et goyaves	Fruits
0.0237563	9.50251e-05	0.00522638	0.00513999	0	0.000142538	2.15966e-05	8.63864e-07	3.45546e-06	4.75125e-06	0	0.0552873	0.00012526	0.00188754	0.00172773	0.00259159	0.0172773	0.00215966	8.20671e-06	8.20671e-05	2.98033e-05	3.45546e-05	0.000475125	0.00239722	0.0431932	Pêches et nectarines	Fruits
0.286202	0.00208539	0.0632089	0.0632089	0	0.00129438	0.00057528	3.5955e-05	2.01348e-05	2.01348e-05	0	0.035955	0.00194157	0.0468134	0.0428584	0.0553707	0.595415	0.0552988	0.000158202	0.00100674	0.000165393	0.000294831	0.0079101	0.0079101	0.7191	Oranges	Fruits
0.483184	0.0050096	0.100192	0.094536	0.0014544	0.0087264	0.0021008	0.0013736	0	0	0	1.92304	0	0.0310272	0.09292	0.12524	1.3332	0.077972	0.0021816	0.0019392	0.0003636	0.0005656	0.0808	0.0808	0.808		Fruits
0.0928399	0.0024984	0.0180358	0.00903267	0.00907702	0.00428719	0.000221751	6.20904e-05	2.95668e-06	0.000113832	0	15.5226	0.00122702	0.0465678	0.0332627	0.0635687	0.521855	0.0480461	0.00056177	0.00104962	0.000192185	0.000384369	0.00739171	0.00443503	3.95214	Patates douces	Vegetables
2.03141	0.0937574	0.343777	0.0156262	0.00281272	0.0906322	0.00625049	0.00312525	0.000625049	0.00156262	0	0.0875069	0.00609423	0.0390656	0.343777	2.34394	9.06322	0.187515	0.00359403	0.0120322	0.00265646	0.0150012	0.156262	0.156262	16.7991	Ail frais	Vegetables
0.0013433	0.00012524	0.00012221	2.01999e-05	6.05998e-06	8.58497e-05	2.01999e-05	7.40664e-06	3.26565e-07	8.41664e-06	0	0	9.7633e-05	0.000336665	0.00114466	0.00136686	0.0200989	0.00919097	5.72331e-05	5.38665e-05	2.45766e-06	3.70332e-05	3.36665e-06	9.42663e-05	5.14652		Vegetables
0.0569422	0.00492732	0.00402621	0.00335518	0	0.00611601	0.000996967	0.000287587	8.05243e-05	0.000383449	0	3.08676	0.00189807	0.0220483	0.0456304	0.0887684	0.527242	0.17792	0.00162966	0.00251159	0.000191724	0.00086276	0.000671036	0.00421794	0.0604992		Vegetables
0.226466	0.0123739	0.00910535	0.00700412	0.00210124	0.0175103	0.00350206	5.83676e-05	5.83676e-05	5.83676e-05	0	4.30753	0.00560329	8.04306	0.268491	0.303512	1.40082	0.758779	0.000700412	0.00291838	0.000583676	0.00151756	0.116735	0.116735	1.21045	Concombres, cornichons	Fruits
0.053002	0.00142077	0.00922393	0.000536349	0.008686	0.00223083	0.000670831	0.000411359	7.59432e-05	0.00014714	0	0.00284787	0	0.0042718	0.033858	0.0265801	0.208844	0.0180365	0.00526856	0.00313266	7.59432e-05	0.000575902	0.000490466	0.00158215	0.730926	Gingembre, brut	Vegetables
0.135001	0.00655383	0.0246455	0.000953641	0.000784889	0.0037086	0.000302182	7.84889e-05	2.62938e-05	0.000113809	0	0	0.000262938	0.0168751	0.02649	0.163257	0.451311	0.0311994	0.000384596	0.00164827	0.000207996	0.00110277	0.00172676	0.00588667	1.54202	Ail frais	Vegetables
0.0282401	0.00281431	0.00163036	0.000705518	0.00019409	0.00288224	0.000518221	0.000133922	7.37543e-05	0.000302781	0	0.111602	0.000869524	0.040953	0.0374594	0.0477462	0.435732	0.0638557	0.000540541	0.00368771	6.0168e-05	0.000560921	0.000426998	0.00145568	1.9706		Vegetables
0.00253168	3.22977e-05	0.000299446	0.000129652	0	6.45953e-05	0.000119501	3.13287e-05	4.06028e-05	3.58043e-05	0.000507535	0.000276837	1.61488e-05	0.005952	0.000369116	9.22791e-05	0.00452167	0.00124577	5.99814e-06	1.5226e-05	1.06121e-06	4.15256e-06	1.84558e-05	0.000461395	11.4313	Oignons et échalotes	Vegetables
0.000131563	4.39877e-06	1.35962e-05	3.99888e-06	7.99776e-06	1.0797e-05	4.39877e-06	3.59899e-07	3.1991e-06	5.19854e-07	0	0.000171952	2.99916e-06	2.51929e-05	0.000103971	0.000103971	0.00127964	4.39877e-05	2.79922e-05	1.59955e-06	1.99944e-07	9.59731e-07	3.99888e-05	3.99888e-05	1.33912	Gingembre, brut	Vegetables
0.0146092	0	0.000715084	0.000307563	0	0	0	0	0	0	0	0	0	0.00384454	0.00384454	0.00615126	0.0561303	0.00538235	0.000192227	0.000153782	6.15126e-06	3.07563e-05	0.00768908	0.00768908	11.8758	Pommes	Fruits
0.336258	0.00185614	0.0694037	0.0513802	0	0.00134503	0.000807019	0	0.000457311	0	0	0.00672516	0.00277077	0.0726318	0.0322808	0.0645616	0.43041	0.0484212	0.000511112	0.00255556	8.07019e-05	0.000322808	0.0269006	0.0269006	8.5717	Raisin, moût	Fruits
1.23169	0.0217357	0.241776	0.179789	0.00483016	0.0456181	0.00670855	0.000134171	0.000134171	0.000134171	0	63.0604	0.0187839	0.0670855	0.225407	0.590353	6.97689	0.402513	0.00187839	0.0050985	0.00161005	0.00241508	0.268342	0.268342	0.123803	Abricots	Fruits
0.158409	0.00190886	0.0391714	0.022734	0.000119304	0.00550123	0.000331399	0.000125932	7.95359e-05	9.94198e-05	0	1.43165	0.00365865	0.001657	0.0271748	0.0523611	0.927918	0.0470587	0.000178956	0.000927918	0.000298259	0.00023198	0.00662799	0.00662799	0.147834	Abricots	Fruits
1.02761	0.00472248	0.221012	0.198344	0.00340018	0.0226679	0.00472248	9.44495e-05	9.44495e-05	9.44495e-05	0	1.26373	0.000755596	0.0472248	0.283349	0.153008	2.64459	0.151119	0.0158675	0.00321128	0.00113339	0.00151119	0.188899	0.188899	1.56262	Ananas et produits	Fruits
5.78587	0.0440291	0.0234257	0.0112895	0.00508028	0.101606	0.58141	0.127289	0.347152	0.0798733	0	0.0705594	0.062939	0.169343	0.592699	1.0725	12.1362	0.265303	0.00564475	0.00959608	0.00508028	0.0121362	0.282238	0.282238	0.00336665	Avocats	Fruits
11.3654	0.133119	2.47401	1.95911	0.47722	0.339077	0.031396	0.000627921	0.000627921	0.000627921	0	3.57915	0.00502337	0.31396	3.51636	3.64194	40.1869	0.640479	0.0452103	0.0251168	0.00753505	0.0175818	1.25584	1.25584	0.191724		Fruits
0.0161171	0.000300641	0.00218813	0.00218813	0	0.00131107	0.0001944	3.16464e-05	1.60493e-05	0.000103981	0	0.0226046	0.000474697	0.000565115	0.00519906	0.0120935	0.0745952	0.0129072	6.32929e-05	0.000264474	2.10223e-05	6.32929e-05	0.000248651	0.000339069	1.16735	Cassis et groseilles	Fruits
1.92782	0.0166799	0.441429	0.409244	0	0.0328899	0.00328899	0.000610812	0.000728276	0.000822247	0	2.06736	0.00493348	0.0234928	0.187942	0.328899	2.84263	0.234928	0.00140957	0.00798754	0.00164449	0.00164449	0	0.234928	0.0158215	Cerises	Fruits
0.127415	0.00115412	0.00720174	0.0036932	0	0.00115412	0.00115412	2.30825e-05	2.30825e-05	2.30825e-05	0	0.0115412	0.00018466	0.0115412	0.0364703	0.055398	0.64631	0.0507815	9.23299e-05	0.000692475	0.00018466	0.00152344	0.046165	0.046165	0.0392445	Citrons & Limes et produits	Fruits
0.729208	0.00459884	0.164389	0.164389	0	0.0185478	0.000635198	0.00019056	0.000254079	5.33567e-05	0	0.226131	0.00116877	0.099091	0.12018	0.157529	1.76839	0.114082	0.000762238	0.00228671	0.000558975	0.000584383	0.00774942	0.00355711	0.00970451	Dattes	Fruits
0.336062	0.00576245	0.0653723	0.0590772	0.000871631	0.0198538	0.0012106	2.4212e-05	2.4212e-05	2.4212e-05	0	0.3564	0.000193696	0.024212	0.106533	0.10169	1.11375	0.276016	0.000290544	0.00130745	0.000387391	0.000774783	0.0484239	0.0484239	0.00461395	Figues	Fruits
0.270079	0.00312999	0.0568422	0.0515035	0.00530737	0.0101751	0.000910732	0.000366386	0.000188427	0.000282641	0	0.00628091	0.000366386	0.0903404	0.054958	0.0786161	0.884562	0.174819	0.000418727	0.00221926	0.000282641	0.000533877	0.0011515	0.0011515	0.000399888	Figues	Fruits
1.83988	0.0300291	0.287422	0.266926	0.00857975	0.181128	0.0119163	0.000238326	0.000238326	0.000238326	0	0.119163	0.0142996	0.119163	0.571983	1.0963	6.67314	0.857975	0.012393	0.0090564	0.000953306	0.00524318	0.476653	0.476653	0.0768908	Fraises	Fruits
0.404549	0.00978482	0.0479374	0.0444017	0.00148006	0.0353569	0.00657803	0.00106893	0.00131561	0.00353569	0	0.822254	0.00723583	0.0205563	0.164451	0.238454	1.39783	0.131561	0.00361792	0.00328901	0.000328901	0.00197341	0.0822254	0.0822254	0.269006	Framboises	Fruits
0.0172242	0.000363244	0.00185885	0.00144957	0.000204644	0.00115965	0.000511611	9.209e-05	8.35632e-05	0.000310377	0	0.172242	8.52685e-05	0.000426343	0.00443396	0.0078447	0.0409289	0.00138135	3.2402e-05	9.55008e-05	2.55806e-05	0.000129608	0.00170537	0.00170537	2.68342		Fruits
0.0886988	0.00158469	0.0157369	0.0146364	0.000198087	0.00253111	0.00132058	7.70337e-05	7.70337e-05	0.00105646	0	0.0133158	4.40193e-05	0.0027512	0.0132058	0.029713	0.253111	0.0104546	0.000110048	0.000187082	0.000121053	0.000242106	0.0110048	0.0110048	0.0662799		Fruits
0.0216787	0.000493705	0.00223433	0.00209825	5.6966e-05	0.0014558	0.000221534	6.64603e-05	3.48125e-05	0.000120261	0	0.00810183	0.000376608	0.000791194	0.00379773	0.0120261	0.0727898	0.0120261	4.11421e-05	0.000110767	2.8483e-05	4.74716e-05	0.00316478	0.00316478	1.88899	Cassis et groseilles	Fruits
0.00197746	3.71703e-05	0.000241855	0.000230951	4.65867e-06	0.000199728	2.92406e-05	2.8745e-06	2.92406e-06	1.53637e-05	0	0.00183373	3.41967e-05	7.43406e-05	0.000446043	0.00129848	0.00926779	0.00125883	7.92966e-06	1.63549e-05	3.1223e-06	6.93845e-06	3.37011e-06	1.48681e-05	2.82238	Cassis et groseilles	Fruits
2.45714	0.0357402	0.446753	0.361464	0.0073105	0.0974733	0.0243683	0.0052798	0.00649822	0.0101535	0	1.54333	0.0389893	0.101535	0.487367	1.05596	11.778	1.1778	0.00203069	0.00649822	0.00609208	0.00487367	0.406139	0.406139	12.5584	Kiwis	Fruits
0.0246722	0.000344192	0.00490397	0.00478214	5.4827e-05	0.000609189	7.61487e-05	1.52297e-06	1.52297e-06	1.52297e-06	0	0.000761487	1.21838e-05	0.000761487	0.0054827	0.00822405	0.0609189	0.00109654	3.04595e-05	7.91946e-05	6.09189e-05	7.00568e-05	0.00304595	0.00304595	0.0226046		Fruits
0.820572	0.0069954	0.158785	0.143239	0.0122142	0.0177661	0.00277595	5.55191e-05	5.55191e-05	5.55191e-05	0	9.5937	0.0227628	0.0277595	0.122142	0.133246	1.66557	0.133246	0.000777267	0.000999343	0.000777267	0.00122142	0.111038	0.111038	2.34928	Mangues, mangoustans et goyaves	Fruits
3.75849	0.0677367	0.887171	0.635406	0.0107899	0.0779272	0.014986	0.00029972	0.00029972	0.00029972	0	149.86	0.00239776	1.43866	0.959103	1.01905	22.7787	0.659384	0.00239776	0.0125882	0.00359664	0.0107899	0.59944	0.59944	0.46165	Cantaloup et autres melons	Fruits
0.0416401	0.000627848	0.00764965	0.00718778	2.16499e-05	0.001732	0.000238149	2.02066e-05	3.39182e-05	0.00010825	0	0.0230933	0.000411349	0.000721665	0.00432999	0.00865998	0.0555682	0.00432999	0.000245366	0.000202066	4.11349e-05	0.000115466	0	0.000360832	0.254079	Myrtilles	Fruits
0.0697637	0.00166666	0.00963122	0.00899701	0.000265485	0.00766958	0.00103244	0.000103244	0.000221238	0.000634215	0	0.230087	0.0018879	0.0036873	0.0294984	0.036873	0.294984	0.0457225	0.00162241	0.000589968	0.000103244	0.000265485	0.0147492	0.0147492	0.484239		Fruits
1.46213	0.0217898	0.309479	0.240004	0.00568431	0.0315795	0.00789487	0.000157897	0.000157897	0.000157897	0	4.10533	0.0157897	0.0789487	0.211583	0.536851	6.0001	0.132634	0.00126318	0.00347374	0.00189477	0.00284215	0.315795	0.315795	0.104682	Pêches et nectarines	Fruits
0.706843	0.0056384	0.00020429	0	0	0.0253319	0.0702757	0.00849846	0.0416751	0.00616955	0	1.08274	0.0249234	2.88457	0.0653728	0.0322778	0.0776301	0.326864	0.000286006	0.0347293	0.000735443	0.000572012	0.102145	0.040858	4.76653	Olives	Fruits
0.810782	0.00685241	0	0	0.000941553	0.0188311	0.0821243	0.0121879	0.0580624	0.00789858	0	0.138617	0.0273573	6.59087	0.12554	0.0350467	0.162156	0.303389	0.000156925	0.000836936	0.000575393	0.000366159	0.0523085	0.0523085	0.822254	Olives	Fruits
6.37432	0.105071	1.12496	1.06472	0.0252171	0.378256	0.0350237	0.000700474	0.000700474	0.000700474	0	0.350237	0.026618	0.350237	2.10142	5.32361	25.2171	9.24626	0.0028019	0.0798541	0.0056038	0.0350237	1.40095	1.40095	0.0170537	Oranges	Fruits
0.000689083	1.22467e-05	0.000139286	0.000132265	2.93922e-06	2.93922e-05	2.44935e-06	8.16449e-08	8.16449e-08	8.16449e-08	0	0.00573147	6.53159e-07	4.08224e-05	0.000293922	0.000142062	0.0032658	0.000359237	6.53159e-07	2.61264e-06	8.16449e-08	4.08224e-07	0.00016329	0.00016329	0.110048	Papayes	Fruits
0.300459	0.00532948	0.06434	0.0610187	0.0013903	0.00386194	0.00193097	3.86194e-05	3.86194e-05	3.86194e-05	0	9.42314	0.000308956	0.0193097	0.0849628	0.0749217	0.772389	0.0463433	0.000154478	0.00123582	0.000231717	0.00069515	0.0772389	0.0772389	0.0316478	Pastèques	Fruits
1.72393	0.0152478	0.339185	0.280372	0	0.0902418	0.00840182	0.0020849	0.00177372	0.00373414	0	0.43565	0.0127583	0.0560122	0.2561	0.479215	4.10756	0.201021	0.000933536	0.00224049	0.00220937	0.00301843	0.155589	0.0124471	0.00495604	Poires	Fruits
3.83258	0.00864208	0.916812	0.777788	0.0469679	0.0574887	0.0078906	0.000638763	0.00027805	0.00191629	0	0.112723	0.00676337	0	0.191253	0.225446	3.90773	0.16683	0.00101451	0.00413317	0.00161569	0.000939357	0.187871	0.00751486	4.06139	Pommes	Fruits
7.76526	0.0363542	1.68684	1.35965	0.00727085	0.203584	0.0363542	0.00756168	0.00145417	0.0218125	0	3.11192	0.0538043	0.218125	0.940847	2.094	17.3046	0.776526	0.00523501	0.0143963	0.00596209	0.00450792	0.727085	0.0290834	0.0304595	Pommes	Fruits
0.0320847	0.000201537	0.00646531	0.00532058	0.000145107	0.000644919	0.000201537	4.03074e-06	4.03074e-06	4.03074e-06	0	0.434514	3.22459e-05	0.00201537	0.00580427	0.0137045	0.112861	0.0112861	1.6123e-05	4.83689e-05	1.6123e-05	5.64304e-05	0.00806149	0.00806149	1.11038	Pamplemousses et pomelos	Fruits
0.62595	0.00825235	0.143977	0.0913026	0.00158024	0.0149245	0.00219477	4.38955e-05	4.38955e-05	4.38955e-05	0	3.77501	0.0105349	0.0219477	0.0834014	0.175582	2.19477	0.114128	0.000702328	0.00140466	0.00087791	0.00105349	0.087791	0.087791	5.9944	Prunes et prunelles	Fruits
0.836519	0.00595426	0.202372	0.139176	0.000657526	0.0186299	0.00146117	0.000584467	0.000511409	0.000182646	0	0.0544285	0.0014977	0.0091323	0.109588	0.241093	2.22828	0.182646	0.00091323	0.00138811	0.000840171	0.00102282	0.0365292	0.00292234	0.0721665	Prunes séchées	Fruits
2.71353	0.0396682	0.545006	0.500164	0.0103482	0.120729	0.0143725	0.00028745	0.00028745	0.00028745	0	0.143725	0.0109231	0.143725	0.40818	1.03482	10.3482	0.235709	0.0028745	0.00632391	0.0034494	0.00632391	0.574901	0.574901	0.147492	Pêches et nectarines	Fruits
2.19418	0.0224201	0.496232	0.463349	0.00538083	0.0298935	0.00747338	0.000149468	0.000149468	0.000149468	0	0.225397	0.00926699	0.0747338	0.227191	0.478296	5.9787	0.358722	0.00239148	0.0059787	0.00567977	0.000747338	0.298935	0.298935	3.15795		Fruits
0.807933	0.00716898	0.177518	0.17069	0.00204828	0.0159311	0.00455174	0.00147931	0.000182069	0.00136552	0	0.273104	0.00455174	0.00216207	0.0771519	0.24807	1.72966	0.102186	0.000580346	0.00227587	0.000887588	0.000432415	0.0168414	0.00455174	0.40858		Fruits
2.29768	0.0214736	0.523956	0.503198	0.00357893	0.030063	0.00644208	0.00221894	0.00243368	0.00128842	0	0.0178947	0.0119536	0.0357893	0.250525	0.586945	6.87155	0.386525	0.0020042	0.0121684	0.00271999	0.00171789	0.0715787	0.0715787	0.523085	Raisins secs	Fruits
0.00137717	4.36665e-06	0.000326939	0.000321341	1.00769e-06	2.23931e-05	5.59827e-07	1.56752e-07	1.11965e-07	2.79913e-07	0	0.000492648	2.12734e-06	1.11965e-05	0.000134358	8.95723e-05	0.00107487	0.0016235	8.17347e-07	2.35127e-06	3.02306e-07	8.95723e-07	5.76622e-05	3.35896e-06	14.0095		Fruits
8.74192	0.0396909	1.92784	1.4232	0.00708766	0.340208	0.021263	0.00297682	0.000708766	0.00524487	0	3.54383	0.0255156	0.283506	0.708766	1.41753	14.1753	0.850519	0.00496136	0.0184279	0.0042526	0.00567013	0	0.00891061	0.0016329	Pommes	Fruits
0.00349423	3.51322e-05	0.000569711	9.68509e-05	1.70913e-05	0.000422536	2.94351e-05	9.49519e-07	9.49519e-07	3.79808e-06	0	0.00569711	9.49519e-07	0.000427284	0.0073113	0.00166166	0.0166166	0.0112043	5.50721e-05	2.3738e-05	1.80409e-06	1.32933e-05	0.000949519	0.000142428	0.772389		Fruits
0.4487	0.00575592	0.0935337	0.0909173	0.00117735	0.0222388	0.000981122	3.27041e-05	3.27041e-05	3.27041e-05	0	1.17735	0.000784898	0.016352	0.0470939	0.0850306	1.04653	0.0451316	0.000850306	0.000392449	0.000196224	0.00016352	0.0654081	0.0654081	3.11179		Fruits
0.0161428	0.000453764	0.0012609	0.000843278	7.2281e-05	0.00172671	6.02342e-05	2.00781e-06	2.00781e-06	2.00781e-06	0	0.00497936	0.000180702	0.00240937	0.00562185	0.00963747	0.0762966	0.022889	3.61405e-05	8.03122e-05	3.21249e-05	6.02342e-05	0.00401561	0.00401561	3.75743	Citrons & Limes et produits	Fruits
0.00159433	5.09055e-05	0.000286344	0.000286344	0	6.00968e-05	1.37869e-05	9.54479e-07	1.44939e-06	7.42372e-06	0	0.00031816	3.07554e-05	0.000353511	0.000636319	0.00134334	0.00685811	0.00137869	3.88862e-05	6.53995e-05	2.12106e-06	4.24213e-06	0.000353511	1.41404e-05	14.5417		Fruits
0.000275694	1.7387e-06	6.21513e-05	6.21513e-05	0	7.01243e-06	2.40152e-07	7.20455e-08	9.60607e-08	2.01727e-08	0	8.5494e-05	4.41879e-07	3.74637e-05	4.54367e-05	5.95576e-05	0.000668583	4.31313e-05	2.88182e-07	8.64546e-07	2.11334e-07	2.2094e-07	2.92985e-06	1.34485e-06	0.0806149		Fruits
0.260843	0.00185324	0.0537439	0.0509641	0	0.00741295	0.00046331	1.52892e-05	1.85324e-05	0.000111194	0	0.171425	0.00125094	0.0170961	0.0174204	0.039891	0.713497	0.0166328	0.000138993	0.000648633	0.000162158	0.000416979	0.000208489	0.00518907	0.87791	Pommes	Fruits
0.20302	0.00222464	0.0448359	0.0270502	0.000194441	0.00566167	0.00103511	0.00040032	8.57829e-05	0.000194441	0	0.0577605	0.000223036	0.00171566	0.0617637	0.0423196	0.852111	0.0125815	0.000325975	0.000657669	0.000223036	0.000348851	0.00373442	0.00171566	0.365292		Fruits
6.00648	0.102859	1.16447	1.09209	0.0228577	0.215878	0.0317467	0.000634935	0.000634935	0.000634935	0	18.6671	0.0266673	0.317467	1.18098	2.28577	17.7782	2.9207	0.00253974	0.0114288	0.00507948	0.0126987	1.26987	1.26987	5.74901	Tangerines, mandarines, clémentines	Fruits
0.756909	0.00966266	0.145233	0.145233	0	0.0219606	0.00424572	0.000556335	0.00111267	0.00146404	0	2.78168	0.00483133	0.0439212	0.0878424	0.260599	2.18142	0.106728	0.00111267	0.00234246	0.000878424	0.00140548	0.00161044	0.00585616	2.98935	Prunes et prunelles	Fruits
2.65718	0.0150406	0.521408	0.521408	0	0.123834	0.00501354	0.000165447	0.000200542	0.00120325	0	1.85501	0.0145393	0.150406	0.350948	0.651761	7.52031	0.55149	0	0.0100271	0.00300813	0.00501354	0.0501354	0.0501354	1.13793	Poires	Fruits
1.56225	0.00742822	0.345876	0.331948	0.00417837	0.0324984	0.0111423	0.00324984	2.32132e-06	2.32132e-06	0.243738	0.554795	0.00858888	0.101674	0.109102	0.222846	2.78558	0.109102	0.000696395	0.00208919	0.000928527	0.000580329	0.580329	0.232132	0.715787		Fruits
2.06366	0.0143559	0.450415	0.450415	0	0.0620891	0.00969021	0.000466566	0.00233283	0.00179448	0	0.789573	0.00807518	0.13979	0.2602	0.482716	3.66075	0.459388	0.00574235	0.0127408	0.00132792	0.00358897	0.00538345	0.0157915	0.00111965		Fruits
0.311727	0.000980431	0.0718983	0.0686302	0	0.0109356	0.000389659	7.29039e-05	1.50836e-05	0.000175975	0	0	0.000666191	0.109356	0.0131981	0.0477646	0.565633	0.0276532	0.000188544	0.00175975	0.000150836	0.000251393	0.000628482	0.00100557	14.1753	Pommes	Fruits
0.166439	0.00163711	0.0356981	0.0352433	0	0.00204639	0.000363802	0.000122783	1.59163e-05	0.000109141	0	0.0886767	0.000432015	0.00454753	0.0159163	0.0454753	0.434289	0.0227376	0.000161437	0.000818555	0.000295589	0.000159163	0.00181901	0.00170532	0.00949519		Fruits
0.0092427	0.000156127	0.00158208	0.000841002	0	0.00106791	2.7062e-05	2.28986e-06	3.74704e-06	1.14493e-05	0	0.00749408	0.000249803	0.00166535	0.00124901	0.00281028	0.0205671	0.00228986	7.49408e-05	9.15943e-05	1.26983e-05	2.08169e-05	0	3.12253e-05	0.654081	Canneberges	Fruits
0.00532465	8.24249e-05	0.00113582	0.000811061	5.6049e-06	0.000235735	1.6485e-05	1.51662e-06	5.2752e-06	6.92369e-06	0	0.000245626	7.58309e-06	0.00130231	0.0013188	0.0019782	0.0155783	0.000412125	1.10449e-05	0.000112098	1.03855e-05	9.39644e-06	0.000107647	4.6158e-05	0.0401561	Pêches et nectarines	Fruits
0.00715459	0.000193595	0.000757544	0.000584993	2.52515e-05	0.00148703	4.20858e-05	5.89201e-06	1.68343e-06	1.34675e-05	0	0.000982002	3.50715e-05	0.000841716	0.00210429	0.00168343	0.0224458	0.0187983	9.82002e-06	0.000126257	1.29063e-05	3.50715e-05	0.000982002	0.00140286	0.00353511	Citrons & Limes et produits	Fruits
0.285016	0.0013552	0.0631015	0.0605605	0.0007623	0.005929	0.0020328	0.0005929	4.235e-07	4.235e-07	0.0444675	0.101217	0.00156695	0.0185493	0.0199045	0.040656	0.5082	0.0199045	0.00012705	0.00038115	0.0001694	0.000105875	0.105875	0.04235	9.60607e-05		Fruits
0.0926181	0.000610945	1.39485e-05	1.39485e-05	0	0.00323605	0.00928971	0.00112146	0.00630473	0.00141159	0	0.00340344	0.000716953	0.942919	0.00809013	0.0167382	0.0892704	0.0306867	7.81116e-05	0.000474249	7.53219e-05	0.000172961	0.00697425	0.0027897	0.46331	Olives	Fruits
3.38976	0.0225383	0.513873	0.504858	0.00378643	0.0554442	0.00676149	0	0.000631072	0.00274967	0	1.57768	0.0166783	0.0365121	0.739256	0.752779	9.15055	0.653611	0.015326	0.0130722	0.00320044	0.0042372	0.220875	0.0531904	0.0571886		Fruits
0.00545435	0.000128338	0.000711389	0.000667134	1.88081e-05	0.000669347	8.85087e-05	6.85942e-06	6.74879e-06	5.75306e-05	0	0.00409353	0.00015489	0.00024008	0.00188081	0.00420416	0.025225	0.00330801	0.000132763	8.6296e-05	1.21699e-05	3.76162e-05	2.10208e-05	4.42543e-05	12.6987	Framboises	Fruits
2.53551	0.0107619	0.57684	0.48644	0.0077486	0.0731812	0.00645716	0.000215239	0.000215239	0.000215239	0.452001	1.33448	0.0172191	0.107619	0.258287	0.473525	6.02669	0.266896	0.00258287	0.00107619	0.00215239	0.00107619	0.430478	0.430478	1.46404		Fruits
0.0839699	0.000839699	0.0173538	0.016794	0.00025191	0.00321884	0.000349874	1.3995e-07	1.3995e-07	1.3995e-07	0.0146947	0.0548603	0.0011056	0.00204327	0.0137711	0.019593	0.209925	0.0144148	0.00016794	0.000209925	8.11709e-05	8.53694e-05	0.00104962	0.013995	5.01354		Fruits
0.104133	0.000547073	0.0224489	0.0192419	0.000339563	0.00390497	0.000471615	1.88646e-07	1.88646e-07	1.88646e-07	0.0198078	0.0913047	0.00137712	0.00107528	0.0109226	0.024524	0.232035	0.0117715	0.000115074	0.00024524	0.000111301	9.62095e-05	0.00141485	0.0188646	2.32132		Fruits
0.0763217	0.0019676	0.0111174	0.00414696	0.00104997	0.000970565	0.00245288	0.00104997	0.000847038	0.000449989	0.0344109	0.00441166	0.000758805	0.0233818	0.04844	0.0423519	0.228524	0.0558516	0.000352933	0.00486165	0.00021176	0.000644102	0.0014382	0.00882332	1.79448		Fruits
0.67276	0.00180075	0.151263	0.126052	0.00129654	0.021609	0.00180075	0.00028812	0.00036015	0.000497007	0	0.0180075	0.00338541	0.0180075	0.0374556	0.086436	1.08045	0.0338541	0.00036015	0.0007203	0.00043218	0.00043218	0.07203	0.07203	0.125696	Pommes	Fruits
0.14709	0.000709526	0.0305642	0.0300184	0.000245605	0.00654947	0.00098242	0.000158279	3.82052e-05	0.000272894	0	0.0518499	0.000136447	0.00272894	0.00818683	0.0218316	0.240147	0.0136447	0.000327473	0.000518499	9.55131e-05	0.000109158	0.0140541	0.00240147	0.227376	Pommes	Fruits
0.230764	0.00144952	0.0465007	0.0382674	0.00104366	0.00463847	0.00144952	2.89905e-05	2.89905e-05	2.89905e-05	0	3.12517	0.000231924	0.0144952	0.0417463	0.0985675	0.811733	0.0811733	0.000115962	0.000347885	0.000115962	0.000405866	0.0579809	0.0579809	0.0208169	Pamplemousses et pomelos	Fruits
0.464107	0.00875887	0.070526	0.070526	0	0.0182003	0.00159252	0.000238878	0.000227503	0.000409506	0	7.80336	0.00147877	0	0.102376	0.204753	1.53565	0.250254	0.000250254	0.000910013	0.000364005	0.000796261	0.113752	0.113752	0.0016485	Pamplemousses et pomelos	Fruits
0.00196588	4.67641e-05	0.000285946	0.000278797	2.9786e-06	0.000162334	3.51475e-05	5.06363e-06	8.04223e-06	8.93581e-06	0	0	4.46791e-06	0.000238288	0.000521256	0.000565935	0.0047062	0.00195099	4.17005e-06	1.99567e-05	2.82967e-06	3.87219e-06	0	0.00029786	0.0140286		Fruits
0.0150594	0.00028975	0.00328638	0.00313388	6.48126e-05	0.00038125	1.525e-05	4.95626e-07	6.10001e-07	3.66e-06	0	0	0.000110563	0.00038125	0.0022875	0.00648126	0.0823501	0.001525	6.48126e-06	4.19375e-05	1.83e-05	3.05e-05	0.0038125	0.0038125	0.4235		Fruits
0.196407	0.00409771	0.0303796	0.0303796	0	0.00529876	0.00120105	0.000310861	0.000105975	0.000438031	0	0.21195	0.000247275	0.170267	0.0641503	0.111627	1.67441	0.0423901	0.00024021	0.0024021	0.000233145	0.000607591	0	0	0.027897	Cantaloup et autres melons	Fruits
0.0671101	0.00147509	0.0104718	0.00983396	1.72759e-05	0.00704324	0.000411963	0	7.17613e-05	0	0	0.0657812	0.000890372	0.00398674	0.0224586	0.0433226	0.299005	0.0531565	0.000558144	0.00132891	0.000116944	0.000292361	0.00046512	0.00152825	4.50766		Fruits
0.14745	0.0296865	0	0	0	0	0.00313576	0.00122875	0.000865038	0.000609459	0	0	0.000285069	0.0530819	0.0235919	0.222157	0.329304	0.00688098	4.52179e-05	0.004394	0.000294899	0.00270324	0.00874868	0.00393199	0.0110636		Fruits
0.140274	0.00130478	0.00243716	0.00243716	0	0.00352644	0.0131262	0.0116373	0.000560312	0.000144976	0	0	9.40384e-05	0.00783653	0.0125385	0.0442764	0.13949	0.00548557	0.00058774	0.000952139	0.000172404	0.000431009	0.00391827	0.000470192	4.30478	Noix de coco	Fruits
0.828963	0.00801129	0.0103469	0.00803549	0.0022267	0.0169423	0.0802339	0.0698265	0.00399354	0.00088342	0	0	0.000532472	0.0321904	0.108915	0.238402	0.782976	0.022267	0.00332795	0.00418717	0.00081081	0.00152481	0.00822912	0.000363049	0.13995	Noix de coco desséchées	Fruits
0.226098	0.0114952	0.0017928	0.000532891	0.000559535	0.00228382	0.0186892	0.00329631	0.00616631	0.00799336	0	0.00342573	0.000829787	0.00266445	0.225337	0.468183	0.307935	0.0175093	0.00172809	0.00335721	0.000510053	0.00297277	0.00380636	0.000951591	0.188646	Citrouilles, courges et potirons	Fruits
0.0547467	0	0	0	0	0	0.00608296	0.00108885	0.00396609	0.000638711	0	0.00152074	0.00275558	0	0	0	0	0	0	0	0	0	0.000456222	0.00032848	0.0882332	Avocats	Fruits
0.683878	0	0	0	0	0	0.0759865	0.00866246	0.0148174	0.0487073	0	0.00189966	0.0119299	0.00189966	1.89966e-05	0.00011398	0.000835851	0.000227959	3.79932e-06	1.89966e-05	1.51973e-05	1.89966e-05	0.00759865	0.00759865	0.7203	Raisin, moût	Fruits
0.0218102	0.000303321	0.0048098	0.00358207	0.000216658	0.000361096	0.000216658	7.22192e-06	7.22192e-06	7.22192e-06	0	0.00361096	5.77754e-05	0.0294654	0.0119884	0.0114106	0.288877	0.0202214	0.000216658	3.61096e-05	7.22192e-06	3.61096e-05	0.0144438	0.0144438	0.272894	Noix de coco	Fruits
0.212212	0.00199795	0.00383787	0.00237045	0	0.000643407	0.0207696	0.018625	0.000993331	0.000225757	0	0	0.000790149	0.0338635	0.0519241	0.108363	0.248333	0.0203181	0.000869164	0.00372499	0.000248333	0.00063212	0.00338635	0.00112878	0.579809	Noix de coco	Fruits
0.019039	0.000241612	0.00126605	0.000879468	0	0	0	0	0	0	0	0.00241612	0	0.00135303	0.00309263	0.00454231	0.0425237	0.00589533	4.83224e-06	4.83224e-05	9.66448e-06	2.41612e-05	0.00966448	0.00966448	1.13752	Citrons & Limes et produits	Fruits
0.0247429	0.000295614	0.0041386	0.00384298	0	0.000295614	0.000295614	0	0	0	0	0	0	0.0393167	0.00591228	0.00886842	0.0149581	0.0136869	2.95614e-06	7.39035e-05	1.24158e-05	2.95614e-05	0.00147807	0.0020693	0.0029786		Fruits
0.112155	0.000240675	0.0269556	0.0255116	0	0	0.000168473	0	0	0	0	0	0	0.00168473	0.0110711	0.0120338	0.115524	0.0312878	1.68473e-05	0.000240675	4.81351e-05	0.000144405	0	0.00240675	0.038125		Fruits
2.24338	0.00687828	0.534389	0.5164	0	0.0021693	0.00317459	0	0	0	0	0.0529098	0	1.48147	0.126984	0.264549	1.06349	0.132275	0.00264549	0.00529098	0.00264549	0.00264549	0.0582008	0.0529098	0.706501		Fruits
0.00190234	3.72197e-05	0.000265855	0.000254039	0	0	7.68026e-05	0	0	0	0	0	0	0.00590789	0	0	0.00490355	0	0	0	0	0	0	0	0.132891		Fruits
0.0242021	0	0.00601046	0.00520907	0	0	0	0	0	0	0	0.00160279	0	8.01395e-05	0.00155471	0.00240418	0.0483241	0.00234007	8.01395e-07	8.01395e-05	8.01395e-06	8.01395e-06	4.00697e-05	0.000560976	0.0982998		Fruits
0.134282	0.00158311	0.0272238	0.0272238	0	0.00424047	0.000848095	0.000565396	0.000254428	1.41349e-05	0.00282698	0	0.000650206	0.0339238	0.0228986	0.0537127	0.193366	0.162269	0.000282698	0.000565396	0.000141349	0.000282698	0	0.00282698	0.0391827		Fruits
0.273987	0.0208791	0.00817009	0.00817009	0	0.0684967	0.00231073	0.000569431	9.07788e-05	0.00115537	0	0.0660209	0.001568	0.495157	0.368067	0.602441	3.52387	0.354037	0.00115537	0.00552925	0.000676715	0.00239326	0.0412631	0.0206315	0.121016	Artichauts	Vegetables
0.311435	0.0314947	0.020255	0.0152205	0.00210746	0.0257578	0.00351243	0.000819566	5.85404e-05	0.00222454	0	5.12814	0.0175621	0.0292702	0.117081	0.573696	2.57578	0.24587	0.00152205	0.00749317	0.00128789	0.00573696	0.117081	0.117081	0.0380636	Asperges	Vegetables
1.42011	0.0577598	0.181096	0.148091	0.00781711	0.186742	0.01216	0.00225828	0.00303999	0.00521141	0	0.955425	0.0178056	0.258399	0.651426	0.651426	5.34169	0.872911	0.00521141	0.0108571	0.00251885	0.00425598	0.0729597	0.0434284	0.00608296	Aubergines	Vegetables
1.30329	0.0438488	0.217113	0.204019	0.00548111	0.0761265	0.0121802	0.00456759	0.00395858	0.00213154	0	0.0761265	0.00121802	2.74055	0.51766	0.548111	9.74419	0.730814	0.00943968	0.00883067	0.00213154	0.00883067	0.304506	0.304506	0.0759865		Vegetables
0.0437044	0.00208116	0.0036569	0.00237847	0.000535156	0.00743272	0.000743272	1.48654e-05	1.48654e-05	1.48654e-05	0	0.265199	0.00121897	0.296119	0.0535156	0.032704	0.713541	0.166493	0.000475694	0.00104058	0.000118923	0.000237847	0.0297309	0.0297309	0.144438		Vegetables
0.305179	0.0281086	0.0147236	0.0147236	0	0.0200776	0.0104403	0.00267701	0.000562172	0.00240931	0	4.17614	0.0120466	0.522017	0.149913	0.682638	1.67313	0.579573	0.000669253	0.000669253	0.000669253	0.000669253	0.0172667	0.0669253	0.112878	Choux-fleurs et brocolis	Vegetables
0.200865	0.0061452	0.0311846	0.0228381	0.00431081	0.0160509	0.00183439	0.0005228	8.25474e-05	0.000843818	0	48.8864	0.00678723	2.13706	0.0733755	0.220126	1.64178	0.229298	0.00412737	0.00587004	0.000917193	0.0023847	0.00779614	0.0183439	0.0966448	Carottes et navets	Vegetables
4.33827	0.0656998	0.764412	0.719569	0.0187714	0.385856	0.0312856	0.00729998	0.00625712	0.0146	0	931.269	0.0875997	4.69284	1.04285	1.98142	25.0285	2.71142	0.0187714	0.0229428	0.00417142	0.0218999	1.04285	1.04285	0.295614	Carottes et navets	Vegetables
1.65608	0.0259534	0.312677	0.247176	0.0164784	0.111229	0.010299	0.00020598	0.00020598	0.00020598	0	341.514	0.0111229	1.77143	0.411959	0.906311	9.47507	1.0299	0.00411959	0.00988702	0.0020598	0.00741527	0.411959	0.411959	0.240675	Carottes et navets	Vegetables
0.243052	0.0182533	0.0249885	0.0213769	0	0.0234267	0.00283073	0.000370923	4.88057e-05	0.00107373	0	0	9.76114e-05	4.14848	0.0649116	0.644235	1.25919	0.184485	0.00034164	0.0077113	0.00146417	0.00497818	0.0107373	0.0195223	5.29098	Champignons et truffes	Vegetables
0.0880437	0.00584326	0.00947556	0.0027637	0.000710667	0.00967297	0.000987037	0.000240837	1.97407e-05	0.000434296	0	13.5422	0.00892282	0.132263	0.0888334	0.148056	1.44897	0.300059	0.00165822	0.00335593	0.00078963	0.00240837	0.00394815	0.00157926	0.0590789		Vegetables
0.172394	0.0121132	0.0205051	0.0155687	0.00379724	0.0182267	0.000569585	1.89862e-05	1.89862e-05	1.89862e-05	0	0.820203	0.00167078	0.0341751	0.0721475	0.235429	1.55687	0.132903	0.000759447	0.00193659	0.000493641	0.00117714	0.0379724	0.0379724	0.0801395	Choux	Vegetables
0.0380112	0.00143176	0.00548629	0.00494146	0.000228067	0.00354771	0.00031676	6.3352e-06	6.3352e-06	6.3352e-06	0	0.0031676	5.06816e-05	0.0177386	0.0122903	0.0380112	0.329431	0.0456135	0.000152045	0.00031676	2.53408e-05	0.000190056	0.0126704	0.0126704	0.282698	Choux	Vegetables
0.107139	0.00808502	0.00907705	0.00694419	0.000892825	0.0163685	0.000744021	2.48007e-05	2.48007e-05	2.48007e-05	0	0.644818	0.000198406	0.0248007	0.036209	0.143844	0.644818	0.238087	0.000545615	0.00168645	0.000545615	0.000644818	0.0496014	0.0496014	0.825262	Choux	Vegetables
0.00978306	0.000675853	0.00079534	0.000634779	6.72119e-05	0.000821478	0.000261379	8.96158e-05	5.22759e-05	9.33498e-05	0	0.000933498	1.4936e-05	0.0022404	0.00365931	0.014936	0.100818	0.00858818	5.22759e-05	0.000100818	7.46799e-06	8.21478e-05	0.00373399	0.00373399	1.17081	Choux-fleurs et brocolis	Vegetables
1.27128	0.108122	0.144022	0.101364	0	0.0760234	0.0126706	0.00380117	0.00295646	0.00464587	0	0.236939	0.00295646	0.211176	0.506822	1.94282	12.6706	1.09812	0.00675763	0.0160494	0.00126706	0.0118259	0.211176	0.105588	4.34284	Choux-fleurs et brocolis	Vegetables
0.0377085	0.00266242	0.00437941	0.00163005	0.000195606	0.00252115	0.000543351	0.000141271	0.00010867	0.00021734	0	0.227121	0.000467281	0.343398	0.0412946	0.0706356	0.192346	0.0630287	0.00151051	0.00340137	0.000141271	0.00124971	0.010867	0.000543351	3.04506		Fruits
0.157942	0.00647968	0.0257162	0.0169079	0.00840334	0.0060747	0.0011137	0.000354358	4.0498e-05	0.000384731	0	0.455603	0.000911205	0.0485976	0.137693	0.250075	1.58955	0.19439	0.000860583	0.00131619	0.000263237	0.000961828	0.0506225	0.00303735	0.297309	Concombres, cornichons	Fruits
0.0515264	0.00384106	0.00562106	0.00558983	0	0.00327895	0.000811931	0.000190492	4.05966e-05	0.000262316	0	0.374737	0.000374737	0.0281053	0.0546492	0.13959	0.818177	0.0583966	0.000562106	0.00112421	0.000162386	0.000968072	0.00181123	0.00512141	1.33851	Citrouilles, courges et potirons	Fruits
1.57893	0.094736	0.142613	0.141595	0	0.1528	0.036672	0.0101867	0.00295413	0.01528	0	17.6229	0.012224	3.9728	2.27163	6.62133	24.2443	1.96603	0.00906613	0.0325973	0.00865867	0.0224107	0.509333	0.254667	0.917193	Citrouilles, courges et potirons	Fruits
0.00406498	0.000581904	0.000250581	5.56846e-05	5.01161e-05	0.00023666	4.17634e-05	7.51742e-06	2.22738e-06	9.7448e-06	0	0.531788	0.000278423	0.0140604	0.00529004	0.0178748	0.0890954	0.0281207	0.000103017	0.000250581	3.06265e-05	4.45477e-05	0.000648726	0.00375871	10.4285		Vegetables
0.0138518	0.000495833	0.00189676	0.00102315	0.000141666	0.00173148	0.000196759	3.93518e-06	3.93518e-06	3.93518e-06	0	0.0587129	3.14814e-05	0.0621759	0.0086574	0.0188889	0.306944	0.0362037	6.29629e-05	4.72222e-05	2.36111e-05	7.08332e-05	0.00787036	0.00787036	4.11959		Vegetables
0.0652253	0.00422945	0.00611487	0.00611487	0	0.00815316	0.000815316	0.000203829	0.000152872	0.000382179	0	1.59496	0.0017835	0.463711	0.0458615	0.127393	1.44719	0.271602	0.00056053	0.0021402	0.000300648	0.000392371	0.00657348	0.00152872	0.976114		Vegetables
0.181573	0.00651446	0.0299388	0.00831633	0.00124745	0.0180187	0.00207908	0.000623725	0.000346514	0.000762331	0	0.0509375	0.00783121	0.25642	0.0693028	0.263351	2.07908	0.284141	0.00110884	0.00187118	0.000762331	0.00117815	0.0693028	0.0693028	0.394815		Vegetables
0.996031	0.0478942	0.185643	0.13563	0.00762917	0.0105961	0.00635764	0.000211921	0.000211921	0.000211921	0	0.699341	0.00169537	0.105961	0.423843	1.14438	7.62917	1.14438	0.00381459	0.00974838	0.0029669	0.00762917	0.423843	0.423843	0.379724		Vegetables
0.295151	0.0355022	0.00451655	0	0.00189065	0.0367626	0.00735253	0.00136547	0.000735253	0.00462159	0	70.1641	0.0418044	0.126043	0.315108	0.315108	1.68058	2.52087	0.00850792	0.0136547	0.00147051	0.00829785	0.105036	0.105036	0.126704	Epinards	Vegetables
0.0168195	0.000771535	0.00202914	0.00169738	0.000138876	0.00200599	0.000192884	3.85767e-06	3.85767e-06	3.85767e-06	0	0.00617999	3.08614e-05	0.0169738	0.00848688	0.021603	0.246891	0.0285468	7.71535e-05	0.000154307	6.17228e-05	0.000146592	0.00771535	0.00771535	0.496014		Vegetables
0.562216	0.0497198	0.0508672	0.0279196	0	0.0458952	0.0076492	0.000803166	0.000256248	0.00325091	0	139.215	0.00688428	0.323944	0.569866	1.12826	7.6492	2.47069	0.0152984	0.0374811	0.00137686	0.0076492	0.0891132	0.0466601	0.0373399		Vegetables
0.404546	0.0143796	0.0619281	0.0536838	0.0034511	0.0402629	0.00287592	9.5864e-05	9.5864e-05	9.5864e-05	0	0.047932	0.000766912	0.191728	0.111202	0.383456	3.25938	0.61353	0.000766912	0.00153382	0.00115037	0.00115037	0.191728	0.191728	4.22352	Carottes et navets	Vegetables
0.447668	0.0140933	0.0756773	0.00236862	0.00213175	0.030792	0.00177646	5.92154e-05	5.92154e-05	5.92154e-05	0	0	0	0.0298446	0.0639526	0.331606	1.77646	0.15396	0.000829016	0.00118431	0.000473723	0.00118431	0.0275944	0.0171725	0.10867	Oignons et échalotes	Vegetables
4.62343	0.179417	0.774022	0.575054	0.0207019	0.32203	0.0172516	0.000575054	0.000575054	0.000575054	0	0.287527	0.0126512	0.287527	1.0696	4.02538	31.0529	3.68034	0.0149514	0.0276026	0.00920086	0.0241523	1.15011	1.15011	1.01245	Oignons et échalotes	Vegetables
0.0122001	0.000729001	0.00152815	0.000177866	4.50929e-05	0.000676393	0.000212939	4.25877e-05	3.50722e-06	7.76599e-05	0	1.46552	0.000861775	0.0219953	0.00330681	0.0165341	0.0994548	0.0156071	4.00825e-05	0.000776599	1.67846e-05	5.26083e-05	0.000275568	0.000100206	0.312281		Vegetables
0.00493301	0.00022756	0.000748352	0.000481083	2.74905e-05	0.000346685	3.81812e-05	7.63624e-06	1.06907e-06	2.13815e-05	0	0.152725	0.000113016	0.00221451	0.00290177	0.00615481	0.0317668	0.00774315	5.19265e-05	0.000229087	1.32871e-05	3.20722e-05	8.55259e-05	0.000167997	10.1867	Poireaux et autres légumes alliacés	Vegetables
1.03065	0.0468476	0.127766	0.0898622	0.0106472	0.136284	0.00851774	0.0011499	0.000127766	0.00468476	0	4.00334	0.0212944	0.247015	0.359875	0.851774	6.4309	1.09027	0.00319415	0.0144802	0.00511065	0.00425887	0.212944	0.212944	0.0278423	Poireaux et autres légumes alliacés	Vegetables
0.0452913	0.00137246	0.00780589	0.00463207	0.000428895	0.00257337	0.000463207	0.000121806	3.43116e-05	0.000274493	0.00171558	1.43079	0.00247044	0.0144109	0.0204154	0.0386006	0.265915	0.01321	0.000171558	0.000686232	8.5779e-05	0.000223026	0.000171558	0.00428895	0.0787036	Piments forts et piments, verts (Capsicum spp., Pimenta spp.)	Vegetables
0.17002	0.011022	0.0179401	0.0128981	0.0021106	0.0164157	0.00293138	5.86277e-05	5.86277e-05	5.86277e-05	0	0.0293138	0.000469021	0.187609	0.0726983	0.234511	2.93138	0.175883	0.000469021	0.00469021	5.86277e-05	0.000938043	0.117255	0.117255	0.509572		Vegetables
0.0273325	0.00124153	0.00438547	0.00108575	8.49715e-05	0.00212429	7.08096e-05	2.36032e-06	2.36032e-06	2.36032e-06	0	0.00118016	0.000896921	0.00377651	0.0108575	0.0415416	0.0802508	0.0179384	9.91334e-05	0.000264356	9.44127e-05	0.000231311	0.00472064	0.00472064	0.693028		Vegetables
4.73151	0.210834	0.610438	0.607987	0	0.294187	0.0637405	0.0137287	0.00858046	0.0294187	0	110.075	0.161803	0.789402	2.47607	6.52115	62.7599	1.99557	0.0161803	0.0294187	0.00710952	0.0213286	1.22578	0.0490312	4.23843	Tomates fraiches, pelées et purée	Fruits
2.7178	0.15891	0.280691	0.279206	0.000371285	0.188613	0.0415839	0.00668312	0.00564353	0.0193068	0	36.3859	0.0995043	16.6335	1.36633	2.67325	28.2176	3.13364	0.0108415	0.114356	0.00891083	0.0163365	0.163365	0.0297028	1.05036	Tomates fraiches, pelées et purée	Fruits
0.00931395	0.000204702	0.00181958	0.00109175	2.84309e-05	0.000250192	7.96064e-05	0	4.54894e-07	1.13723e-07	0	0.00284309	2.16075e-05	0.00408267	0.0016035	0.0072783	0.051403	0.0037415	5.68617e-06	2.27447e-05	5.68617e-06	3.8666e-05	0.000568617	0.000568617	0.0771535		Vegetables
0.0590351	0.00417025	0.00641176	0.00129017	0.000781922	0.0070373	0.000234577	4.69153e-05	6.51602e-06	8.34051e-05	0	0.0104256	0.000351865	0.0788439	0.0622932	0.10582	0.50434	0.0677666	0.000338833	0.00155081	0.000299737	0.00063857	0.000299737	0.000651602	3.8246	Artichauts	Vegetables
0.000585501	3.09321e-05	6.60069e-05	6.60069e-05	0	7.45685e-05	3.86651e-06	9.3901e-07	4.41887e-07	2.09896e-06	0	0.000386651	4.69505e-06	6.90449e-05	0.000331415	0.000751208	0.00649022	0.000240276	6.62831e-06	8.83774e-06	2.23705e-06	4.41887e-06	5.52359e-06	4.14269e-06	1.91728	Aubergines	Vegetables
0.175002	0.00824243	0.0237717	0.00955644	0.0010751	0.0268775	0.00149319	2.98639e-05	2.98639e-05	2.98639e-05	0	0.0149319	0.000716733	0.203074	0.0776461	0.334476	2.98639	0.238911	0.00119456	0.00167238	0.000657005	0.00197102	0.0597278	0.0597278	1.18431		Vegetables
0.0351991	0.0039848	0.00183744	0.000553444	0.000177102	0.00436114	0.000553444	0.000221378	1.90385e-05	0.000219164	0	0.66192	0.000354204	0.0110689	0.0270081	0.0730547	0.571155	0.0221378	0.000376342	0.00177102	0.000139468	0.000464893	0.0051581	0.00320998	11.5011	Champignons et truffes	Vegetables
0.0028513	0.000312851	0.000134645	0.000134645	0	0.000229688	3.80174e-05	4.83137e-06	1.74246e-06	1.26725e-05	0	0.0285922	8.23709e-05	0.00150485	0.00173454	0.00605902	0.0282754	0.00363541	3.16811e-05	6.01941e-05	4.67297e-06	3.16811e-05	4.75217e-05	6.33623e-05	0.0250516	Choux-fleurs et brocolis	Vegetables
0.0262714	0.00210382	0.00299715	0.00116292	0.000528599	0.00208796	0.000211439	3.70019e-05	1.00434e-05	0.000121578	0	0.237869	0.000470453	0.00872188	0.0124221	0.0403849	0.230469	0.0170737	0.00015858	0.000607888	3.27731e-05	0.000227297	0.000581459	0.00013215	0.0152725	Choux	Vegetables
0.00475943	0.000434484	0.000373126	5.30668e-05	0.000320059	0.000393026	8.29168e-05	1.06134e-05	3.48251e-06	4.31168e-05	0	0.933644	0.000409609	0.0110611	0.00870627	0.00749568	0.0835802	0.018905	0.000215584	0.00059866	1.65834e-05	0.000135984	1.65834e-05	0.000563834	4.25887	Epinards	Vegetables
0.0411708	0.00480042	0.00158875	0.000683333	0.0003075	0.0041	0.000854166	0.000138375	2.22083e-05	0.00035875	0	10.045	0.00213542	0.550083	0.129833	0.0751666	0.591083	0.216958	0.001025	0.00392917	0.0003075	0.000785833	0.00230625	0.00476625	0.171558	Epinards	Vegetables
0.0073203	0.000212345	0.00131318	0.00106172	0.000192787	0.000530861	2.79401e-05	3.07341e-06	1.6764e-06	1.48082e-05	0	0	8.38202e-06	0.0117348	0.00265431	0.0107569	0.066218	0.011176	2.79401e-05	0.00011176	1.76022e-05	6.98502e-05	0.000349251	0.0001397	1.17255	Carottes et navets	Vegetables
0.0570742	0.00217288	0.0094158	0.00217288	0.000260745	0.00434575	0.000289717	0	2.02802e-05	0.000108644	0	0.302754	0.000622891	0.463547	0.0176727	0.0478033	0.315791	0.0422987	0.000217288	0.000651863	0.000114438	0.000318689	0.0144858	0.0144858	0.0472064	Artichauts	Vegetables
2.9697	0.131721	0.511915	0.398156	0.00658604	0.125733	0.0158664	0.0027841	0.00185607	0.00598731	0	23.4702	0.170638	3.23315	1.89498	3.08346	30.2359	1.36511	0.00149683	0.0359238	0.00149683	0.00149683	0.0119746	0.131721	24.5156	Tomates fraiches, pelées et purée	Fruits
0.00531622	0.000463794	0.00035197	0.00035197	0	0.000564619	7.51603e-05	9.89916e-06	2.56645e-06	1.39322e-05	0	0.058845	2.93309e-05	0.0047296	0.00329972	0.00599449	0.0423464	0.0176352	3.1164e-05	0.000170486	8.98258e-06	4.03299e-05	0.000340971	5.49954e-05	14.8514	Choux	Vegetables
0.02474	0.0022595	0.00204499	0.00175897	0.000120125	0.00214509	0.000386116	0.000121555	1.71607e-05	0.00024311	0	0.70502	0.00105824	0.416148	0.0121555	0.0500521	0.203069	0.022595	0.00022881	0.00155877	0.000108685	0.000600625	0.000286012	0.00100104	0.0113723	Asperges	Vegetables
0.0124655	0.000833252	0.00136653	0.000833252	5.99941e-05	0.00109989	0.000176649	2.59975e-05	1.93314e-05	9.66572e-05	0	0.154985	0.000229978	0.0739928	0.00406627	0.0176649	0.0839918	0.00876581	3.33301e-05	0.000233311	9.99902e-06	6.66602e-05	0.000499951	0.000333301	0.13032	Choux	Vegetables
0.0243495	0.00117101	0.00256507	0.00148699	0.000334574	0.00371749	0.000278811	0.000185874	1.46841e-05	7.80672e-05	0	0.10409	0.00079926	0.395912	0.0148699	0.0613385	0.522307	0.0542753	0.000204462	0.000836434	7.43497e-05	0.000260224	0.00185874	0.000371749	0.00276179		Vegetables
0.237141	0.027259	0.00855663	0	0.00244475	0.0305594	0.00452279	0.000794545	7.33426e-05	0.00330042	0	0.122238	0	3.06816	0.0592852	0.574517	0.881333	0.271368	0.000330042	0.0110014	0.00207804	0.00537846	0.00611188	0.0305594	0.597278	Champignons et truffes	Vegetables
0.0289618	0.00129294	0.00439599	0.00103435	0.00258587	0.00258587	0.000155152	7.24045e-05	1.13778e-05	5.79236e-05	0	0.0196526	0.00044477	0.243072	0.00920571	0.0341335	0.178942	0.0217213	0.000155152	0.000465457	8.17136e-05	0.000227557	0.00062061	0.00020687	0.221378		Vegetables
0.0332866	0.001037	0.00439127	0.00384076	0.000230445	0.00409681	0.000320063	6.40126e-06	6.40126e-06	6.40126e-06	0	0.197159	0.000358471	0.00320063	0.00985794	0.0217643	0.20484	0.00793756	8.96177e-05	0.000281655	5.12101e-05	0.000140828	0.0128025	0.0128025	0.00792028	Piments forts et piments, verts (Capsicum spp., Pimenta spp.)	Vegetables
0.068853	0.00366155	0.00939267	0.00939267	0	0.00477593	0.000795989	0.000115418	5.17393e-05	0.000437794	0	1.0507	0.00198997	0.00795989	0.0397994	0.071639	0.660671	0.0358195	0.000477593	0.00183077	0.000258696	0.000477593	0	0.00397994	0.0528599	Piments forts et piments, verts (Capsicum spp., Pimenta spp.)	Vegetables
0.0776146	0.00224786	0.0126813	0.010179	0.000381711	0.00678598	0.000530155	1.06031e-05	1.06031e-05	1.06031e-05	0	1.17482	0.00731613	0.00530155	0.0173891	0.0402917	0.381711	0.010179	0.000169649	0.00044533	8.48247e-05	0.000296887	0.0212062	0.0212062	0.0165834	Piments forts et piments, verts (Capsicum spp., Pimenta spp.)	Vegetables
1.26767	0.0440383	0.220192	0.188736	0.00566207	0.0692031	0.00943678	0.00314559	0.000660575	0.00346015	0	6.57429	0.0283103	0.534751	0.440383	0.817855	5.66207	0.283103	0.00314559	0.0141552	0.000314559	0.00629119	0	0.0314559	0.170833	Piments forts et piments, verts (Capsicum spp., Pimenta spp.)	Vegetables
0.0931396	0.00299833	0.0176072	0.0137158	0.000574148	0.00382765	0.000478457	1.59486e-05	1.59486e-05	1.59486e-05	0	0.00797428	0.000127588	0.0733634	0.0318971	0.102071	0.956913	0.124399	0.000191383	0.000733634	3.18971e-05	0.000478457	0.0318971	0.0318971	0.0279401		Vegetables
0.0471954	0.00415452	0.000997085	0.000764432	0.000222682	0.0103032	0.000664723	0.000159534	1.32945e-05	0.000292478	0	4.98543	0	0.0731196	0.0498543	0.0930613	1.04362	0.172828	0.00139592	0.0027586	0.000329038	0.00262566	0.00199417	0.00132945	0.144858		Vegetables
0.242521	0.0084061	0.0439629	0.0326582	0.000869596	0.0123193	0.00115946	0.000183581	0.000140102	0.000454122	0	0.0966218	0.000289865	0.292281	0.0917907	0.184065	1.5846	0.106767	0.0022223	0.00338176	0.000473447	0.00260879	0.000966218	0.00241555	2.99365		Vegetables
0.00519117	0.000338555	0.000827578	0.000526641	3.38555e-05	0.000206895	2.06895e-05	2.6332e-06	1.50469e-06	9.96856e-06	0	0.00394981	9.78047e-05	0.00394981	0.00357363	0.00846387	0.0639492	0.00470215	2.6332e-05	7.52344e-05	2.44512e-05	5.83067e-05	0.00188086	0.00188086	0.0183318	Choux	Vegetables
0.017076	0.00101916	0.0022408	0.0022408	0	0.00175485	6.07447e-05	7.42435e-06	4.72459e-06	2.90225e-05	0	0.0134988	8.09929e-05	0.0188983	0.0079643	0.0222731	0.176835	0.0368518	0.000107991	0.000445461	2.2948e-05	9.44917e-05	0.000998913	0.00091117	0.143006	Choux	Vegetables
0.602278	0.0191312	0.106284	0.0732181	0.0141712	0.0472375	0.00165331	0.000873893	0.000212569	9.4475e-05	0	142.185	0.0056685	0.0590468	0.162969	0.495994	5.43231	0.307044	0.00094475	0.00425137	0.00094475	0.00236187	0.236187	0.236187	0.0333301	Citrouilles, courges et potirons	Fruits
0.122599	0.00348907	0.0235175	0.00636129	0.000346979	0.00501193	0.000481916	9.63832e-06	9.63832e-06	9.63832e-06	0	0.00481916	7.71065e-05	0.00963832	0.0144575	0.0886725	0.424086	0.0183128	0.000154213	0.00023132	0.000134936	0.000385533	0.0192766	0.0192766	0.185874	Oignons et échalotes	Vegetables
0.166052	0.0197681	0.00494202	0	0.00177913	0.0227333	0.00247101	4.94202e-05	4.94202e-05	4.94202e-05	0	32.4197	0.00217449	0.0247101	0.187797	0.296521	3.26173	0.405246	0.00276753	0.00395362	0.000988404	0.00138377	0.0988404	0.0988404	1.22238		Vegetables
0.0428392	0.00323906	0.00447796	0.00349281	0.000268678	0.00328384	0.000701548	9.10519e-05	1.19412e-05	0.000268678	0	0	1.49265e-05	0.00298531	0.0179119	0.129861	0.531385	0.00895593	0.000179119	0.00259722	0.000746327	0.00129861	0.0177626	0.0149265	0.103435	Champignons et truffes	Vegetables
0.00832175	0.00057322	0.000578248	0.000470141	0	0.00106347	0.000196102	0.000125706	5.53107e-06	6.53672e-05	0	0.0751723	1.50847e-05	0.00125706	0.00251412	0.0134506	0.112884	0.00209426	7.03954e-05	0.000884971	9.80508e-05	0.000211186	0.000226271	0.00082966	0.128025	Champignons et truffes	Vegetables
0.00134929	0.000174031	5.5073e-06	2.42321e-06	0	0.000184495	2.97394e-05	8.81168e-06	1.59712e-06	1.32175e-05	0	0	2.75365e-06	0.00115653	0.00104639	0.0106842	0.022635	0.00236814	3.24931e-05	6.60876e-05	3.4696e-05	0.000111798	0.00012832	7.98559e-05	0.397994	Champignons et truffes	Vegetables
0.0115114	0.000912976	0.000793892	0.000764121	2.729e-05	0.000893129	0.000322519	4.96183e-05	1.98473e-05	0.000129007	0	0.148359	7.93892e-05	0.00198473	0.0511068	0.0312595	0.193511	0.021832	0.000173664	0.00119084	6.45037e-05	9.92365e-05	0.000446564	0.000198473	0.212062		Vegetables
0.00088659	0.000106391	5.21523e-05	2.46854e-05	0	8.34437e-05	1.25166e-05	2.15563e-06	1.07782e-06	4.17219e-06	0	0.00100828	0	0.000469371	0.000625828	0.00417219	0.0146027	0.000173841	3.82451e-06	4.06788e-05	8.34437e-06	2.67715e-05	8.101e-05	5.04139e-05	3.14559	Champignons et truffes	Vegetables
0.12988	0.00552681	0.0178516	0.0154751	0.000994826	0.0149224	0.000829022	2.76341e-05	2.76341e-05	2.76341e-05	0	0.013817	0.00353716	0.0386877	0.0353716	0.105009	0.663218	0.232126	0.000442145	0.00105009	0.000386877	0.000386877	0.0552681	0.0552681	0.318971	Choux	Vegetables
0.0187964	0.00174098	0.00123255	0.000770343	0.000462206	0.00308137	7.70343e-05	3.08137e-05	2.15696e-05	4.62206e-05	0	0.0215696	0.00049302	0.0895139	0.015715	0.0266539	0.415985	0.0662495	0.000215696	0.000308137	0.00024651	0.000277324	0.00277324	0.0154069	0.332362		Vegetables
0.00219444	0.000106183	0.000353942	0.000353942	0	9.73341e-05	1.76971e-05	2.47759e-06	2.65457e-06	7.16733e-06	0	0.030616	3.36245e-05	0.00115031	0.000884855	0.00247759	0.018051	0.00115031	8.84855e-06	4.51276e-05	7.9637e-06	6.19399e-06	0.000206171	0.000128304	0.483109	Tomates fraiches, pelées et purée	Fruits
0.434835	0.0523631	0.00665964	0.00665964	0	0.0483151	0.0113606	0.0020893	0	0.00483151	0	94.5408	0.0462258	1.26664	1.07077	0.652906	3.94355	1.99789	0.00940185	0.0255939	0.0020893	0.00639848	0.130581	0.130581	0.0188086	Epinards	Vegetables
0.504389	0.0583199	0.0595021	0	0.00236432	0.0118216	0.00788107	0.00236432	0.00210162	0.00236432	0	0.0328378	0.000525405	0.144486	0.183892	1.83892	7.09297	0.0354648	0.000656756	0.00407189	0.0051227	0.0106394	0.131351	0.131351	0.0674941	Champignons et truffes	Vegetables
0.0266181	0.000633764	0.00530057	0.00216632	0.00109468	0.0011523	0.00011523	1.95891e-05	4.03304e-06	4.60919e-05	0	0.344537	0.000184368	0.0149799	0.00720186	0.021087	0.27079	0.021087	0.000195891	0.000495488	7.25948e-05	0.000241983	0.00268485	0.000576149	2.36187	Citrouilles, courges et potirons	Fruits
0.0846885	0.00235	0.0152528	0.00775942	0.00266037	0.00399056	0.000665093	0.000177358	0.000310377	0.000155188	0	11.7721	0.0033698	0.00554244	0.0188443	0.0598584	0.731602	0.0399056	0.000133019	0.000421226	0.000177358	0.000532074	0.0221698	0.0221698	0.192766	Citrouilles, courges et potirons	Fruits
0.0857914	0.00167028	0.0169558	0.00607373	0.000227765	0.0045553	0.000379608	6.3268e-05	0.00013919	5.94719e-05	0	0	0.00126536	0.0126536	0.0366955	0.0873099	0.464387	0.0468183	0.000366955	0.000733909	0.00017715	0.000328994	0.0126536	0.0126536	0.988404		Vegetables
0.0153668	0.00113446	0.00165013	0.00165013	0	0.00134073	0.000175326	3.81592e-05	1.34073e-05	7.94124e-05	0	0.845691	0.00012376	0.00464099	0.0170169	0.0314556	0.321775	0.0293929	0.000175326	0.000618798	6.29111e-05	0.000268146	0.000247519	0.0001547	0.149265	Citrouilles, courges et potirons	Fruits
0.00173065	8.24119e-05	0.000207403	5.49413e-05	1.23618e-05	0.000178559	1.71691e-05	3.43383e-07	3.43383e-07	3.43383e-07	0	0.000734839	2.88442e-05	0.0201222	0.00137353	0.00178559	0.00961472	0.00247236	3.43383e-06	2.47236e-05	4.12059e-06	1.37353e-05	0.000686766	0.000686766	0.0251412	Artichauts	Vegetables
0.0452512	0.00448216	0.00433896	0.0024344	0.0002864	0.00276376	0.000615761	0.000101672	0	0.00038664	0	0.428168	5.72801e-05	0.00716001	0.017184	0.184728	0.516952	0.032936	0.00024344	0.001432	0.00032936	0.000572801	0	0.0020764	0.0055073	Champignons et truffes	Vegetables
0.0258503	0.00191484	0.00218838	0.00218838	0	0.00410322	0.000136774	2.73548e-05	0	6.8387e-05	0	0.408954	0.000779611	0.00957418	0.0166864	0.0410322	0.246193	0.0492386	0.000232516	0.000410322	8.61676e-05	0.000273548	0.00318683	0.00198322	0.0496183		Vegetables
0.00590918	0.000211367	0.000968196	0.000897741	7.04556e-05	0.000409097	4.09097e-05	6.59101e-06	6.13645e-06	2.15912e-05	0	0.000227276	5.45463e-05	0.00113638	0.00227276	0.00931832	0.0490916	0.00409097	2.20458e-05	4.09097e-05	6.59101e-06	2.72731e-05	0.00227276	0.00227276	0.00347682		Vegetables
0.00874332	0.000773448	0.000924775	0.000661354	0.000100884	0.000588493	0.000112094	1.73746e-05	9.52798e-06	5.04422e-05	0	1.50206	6.16516e-05	0.0285839	0.00980821	0.0211857	0.139557	0.0484246	9.52798e-05	0.000381119	1.17699e-05	9.52798e-05	0.000162536	0.000168141	0.552681	Choux	Vegetables
0.904546	0.0415883	0.125805	0.110902	0.00623825	0.0623825	0.00866423	0.000173285	0.000173285	0.000173285	0	68.6207	0.045054	0.939203	0.381226	0.693139	9.0108	0.693139	0.00277255	0.0135162	0.00277255	0.00311912	0.346569	0.346569	0.154069	Tomates fraiches, pelées et purée	Fruits
1.93518	0.0575213	0.309793	0.149555	0.00739559	0.0977862	0.0164347	0.00349236	0.00234194	0.00944992	0	8.58711	0.0944992	9.8197	1.2326	1.72153	32.7871	0.817624	0.00657386	0.024652	0.00616299	0.00821733	0.0164347	0.0903906	0.00884855	Tomates fraiches, pelées et purée	Fruits
0.00473547	0.000353734	0.000342323	0.000339471	0	0.000599066	8.55808e-05	1.14108e-05	3.42323e-06	4.56431e-05	0	1.49196	3.7085e-05	0.00228216	0.00399377	0.00855808	0.0704616	0.00941389	4.56431e-05	0.000276711	1.36929e-05	6.5612e-05	0.000285269	0.000356587	1.30581		Vegetables
0.868257	0.0337512	0.144795	0.123669	0.00463757	0.0309172	0.00644107	0.000128821	0.000128821	0.000128821	0	35.0394	0.0103057	0.0644107	0.283407	0.798693	8.50222	0.170044	0.00412229	0.00953279	0.00128821	0.00463757	0.257643	0.257643	1.31351	Tomates fraiches, pelées et purée	Fruits
0.308381	0.00793106	0.0664614	0.0331421	0	0.0081526	0.00040763	6.91199e-05	5.67138e-05	0.000159507	0	0.00974768	0.000159507	0.150646	0.081526	0.268504	1.43557	0.227741	0.00123175	0.00137354	0.000372184	0.00167483	0.00487384	0	0.11523	Oignons et échalotes	Vegetables
0.00711741	0.000620059	0.000820312	0.000820312	0	0.000410156	6.0317e-05	2.41268e-08	2.41268e-08	2.41268e-08	0	0.00120634	2.29205e-05	0.00412569	0.00386029	0.0103745	0.0289522	0.00386029	2.89522e-05	0.000106158	2.41268e-05	7.72058e-05	0.0060317	0.00241268	0.221698		Vegetables
0.00210148	0.000193336	0.000228161	0.000138097	2.16152e-05	0.000150106	1.80127e-05	4.92347e-06	4.80339e-07	9.36661e-06	0	0.000960678	7.56534e-05	0.00889828	0.000420296	0.00321827	0.0235366	0.00204144	1.68119e-05	2.88203e-05	1.17683e-05	6.72474e-05	0.00120085	0.00120085	0.126536		Vegetables
0.253933	0.0132568	0.0404239	0.0351025	0	0.011483	0.0027914	0.000429446	0.000494796	0.00112963	0	0.489195	9.33578e-06	0.230594	0.181114	0.332354	3.20217	0.102694	0.00172712	0.00848622	0.00132568	0.00185782	0.00513468	0	0.103133	Tomates fraiches, pelées et purée	Fruits
0.0749202	0.00434882	0.0105491	0.00637252	0.000775037	0.00495162	0.000775037	9.90325e-05	2.71263e-05	0.000378907	0	1.28742	0.000947267	0.0408186	0.0375893	0.101616	0.770731	0.0749202	0.000818094	0.00185148	0.000124867	0.000904209	0.000645864	0.00258346	0.00686766		Vegetables
0.173705	0.0189607	0.0144346	0.00899106	0.00110095	0.0183491	0.0006728	0.000110095	4.89309e-05	0.0003364	0	3.65147	0.0080736	0.146793	0.122327	0.3364	1.10095	0.311935	0.0020184	0.00373098	0.000263004	0.00183491	0.0611637	0.0611637	0.1432	Choux-fleurs et brocolis	Vegetables
0.0382389	0.00325209	0.00377029	0.00185834	0.000160818	0.00366307	0.000348439	7.2368e-05	2.6803e-05	0.000178686	0	0.495855	0.000455651	0.0134015	0.0160818	0.0500322	0.259095	0.0232292	0.000187621	0.000428848	3.03767e-05	0.000214424	0.00893432	0.00893432	0.136774	Choux	Vegetables
0.401091	0.0152796	0.0608457	0.0491131	0.00491131	0.0218281	0.00682127	0.000136425	0.000136425	0.000136425	0	0.663027	0.0010914	0.0682127	0.242837	0.682127	3.81991	0.436561	0.00300136	0.00381991	0.000545702	0.00354706	0.272851	0.272851	0.0227276	Concombres, cornichons	Fruits
0.00120568	3.08845e-05	0.000243512	7.60234e-05	3.5636e-06	4.15753e-05	4.35551e-06	9.89888e-07	1.38584e-06	6.73124e-07	0	0	0	7.9191e-05	0.000277169	0.000574135	0.00231634	5.93933e-05	3.95955e-06	8.71101e-06	1.7818e-05	2.6331e-05	0.000197978	0.000197978	0.0560469	Champignons et truffes	Vegetables
0.0626415	0.00581349	0.00473191	0.00461925	4.73191e-05	0.00360527	0.00148717	0.000193783	0.000110411	0.000721054	0	3.19968	0.000968916	0.0608389	0.105905	0.117171	0.831465	0.360527	0.000721054	0.00328981	0.00017125	0.00105905	0.00525017	0.00326727	3.46569		Vegetables
0.0198084	0.00226171	0.00110868	0.00110868	0	0.00199562	0.000251301	4.2869e-05	2.36518e-05	0.000101999	0	3.76951	0.000133042	0.0317822	0.0155215	0.0502602	0.440516	0.09239	0.000221736	0.000990421	3.54778e-05	0.000266083	0.0147824	0.0147824	4.10866	Choux	Vegetables
0.0219964	0.000773948	0.00369662	0.00236258	0.000183303	0.0017312	0.000112019	1.22202e-05	2.03671e-05	4.48075e-05	0	0.212836	0.000437892	0.17923	0.0437892	0.0234221	0.399194	0.0733214	0.000132386	0.000743397	8.04498e-05	0.000183303	0.0101835	0.0101835	0.0285269		Vegetables
1.0186	0.0569218	0.16777	0.149195	0	0.0419424	0.00659095	0.000898766	0.000958684	0.00263638	0	17.5559	0.0335539	0.659095	0.53926	1.6777	13.0621	0.659095	0.00659095	0.0407441	0.00449383	0.00838848	0.0107852	0.0898766	2.57643	Tomates fraiches, pelées et purée	Fruits
0.0879273	0.00262862	0.016166	0.00499437	0.000236576	0.0038115	0.000525723	0.000157717	0.000157717	0.000144574	0	0.00695269	5.25723e-05	0.00328577	0.0144574	0.0630868	0.354863	0.0289148	0.000157717	0.000328577	0.000118288	0.000354863	0.0131431	0.0131431	0.0886152	Oignons et échalotes	Vegetables
0.180866	0.00412994	0.0129605	0.00628679	0	0.00544533	0.0113162	0.0012767	0.00568713	0.00342388	0	0.0106392	9.67198e-06	0.986542	0.0783431	0.134441	1.5185	0.0454583	0.000454583	0.00259209	0.000454583	0.000754415	0.00531959	0	0.0241268	Tomates fraiches, pelées et purée	Fruits
0.474966	0.0149099	0.0326635	0.0184453	0.0122969	0.0253623	0.0261308	0.0166776	0.00591787	0.0013834	0	7.99296	0.00330478	1.93676	0.13834	0.322793	1.99824	0.36122	0.0013834	0.00514931	0.000922265	0.00253623	0.0768554	0.0768554	0.0120085		Vegetables
0.0143522	0.00124585	0.00137044	0.000822261	8.97012e-05	0.00119103	0.000189369	3.63788e-05	1.34552e-05	6.97676e-05	0	0.104153	0.000214286	0.00395184	0.00607975	0.0164452	0.108638	0.0433556	7.4751e-05	0.000448506	3.93689e-05	0.000109635	0.0049834	0.0049834	0.0933578	Choux-fleurs et brocolis	Vegetables
0.157843	0.00440959	0.0253552	0.0240523	0.000901962	0.0155338	0.000751635	2.50545e-05	2.50545e-05	2.50545e-05	0.0526145	30.3661	0.00581265	0.260567	0.0420916	0.125273	1.15251	0.150327	0.00050109	0.00160349	0.000300654	0.00115251	0.050109	0.050109	0.430576	Carottes et navets	Vegetables
0.0797654	0.00392519	0.00911204	0.00322426	0.000252333	0.00210278	0.00266352	0.00182241	0.000133176	0.000700926	0	0.292987	0.000602796	0.308407	0.0171026	0.0462611	0.305604	0.0409341	0.000210278	0.000630833	0.000110746	0.000308407	0.0140185	0.0140185	0.611637	Citrouilles, courges et potirons	Fruits
0.0168423	0.00155947	0.00194934	0	0.000140352	0.00155947	0	0	0	0	0	0.233141	0.000124758	0.014815	0.00951277	0.0257313	0.201172	0.0194934	0.000132555	0.000483436	4.91233e-05	0.000163744	0.00181678	0.00113062	0.0893432		Vegetables
0.0115656	0.000609417	0.00125887	0.000938591	8.00694e-05	0.00178377	8.00694e-05	0	5.78279e-06	2.98036e-05	0	0.0929695	0.000191277	0.0242432	0.00542693	0.0146794	0.0969729	0.0222415	6.67245e-05	0.000222415	3.51416e-05	9.78626e-05	0.0044483	0.0044483	2.72851		Vegetables
0.00267236	0.000270535	0.000223246	0.00016496	1.97952e-05	0.000236443	2.96929e-05	7.58817e-06	7.69815e-07	1.75958e-05	0	0.0328821	1.75958e-05	0.000423398	0.00134168	0.00940274	0.0293629	0.00246341	1.86955e-05	0.000109974	6.92833e-06	2.30944e-05	0.000256238	0.000159462	0.00197978	Asperges	Vegetables
0.0101343	0.000849243	0.000574654	0.000452929	5.09546e-05	0.00121725	0.000226465	7.64318e-05	5.09546e-05	7.3601e-05	0	0.0229579	0.00020948	0.000707702	0.00368005	0.0155694	0.073601	0.00905859	5.37854e-05	0.000150033	1.4154e-05	9.05859e-05	0.00283081	0.00283081	0.225329	Choux-fleurs et brocolis	Vegetables
0.0212023	0.00204656	0.00204656	0.00153901	0.000147352	0.00147352	0.000245587	5.73036e-05	4.91174e-06	0.000139166	0	0.244768	0.00013098	0.0063034	0.00597595	0.0347915	0.138347	0.0135891	0.000139166	0.000507547	5.15733e-05	0.000171911	0.00190739	0.001187	0.147824	Asperges	Vegetables
0.000601848	2.88027e-05	4.72881e-05	3.82603e-05	3.69707e-06	0.000105753	1.03174e-05	1.76256e-06	3.5681e-07	4.08397e-06	0	0.0128538	2.19245e-05	0.0438489	0.00323708	0.000838288	0.00511571	0.00147453	3.00924e-05	0.000210217	3.00924e-06	2.06348e-05	0.000100165	0	0.101835		Vegetables
0.0308553	0.00192196	0.00270114	0.00062334	9.35009e-05	0.00114279	0.00114279	0.00062334	8.31119e-05	0.000425949	0	0.108565	0.000223363	0.150121	0.00633729	0.0171418	0.11324	0.0151679	7.79174e-05	0.000233752	4.10365e-05	0.000114279	0.0051945	0.0051945	5.99177	Epinards	Vegetables
0.000615487	7.60308e-05	2.53436e-05	7.16862e-06	0	8.76165e-05	3.93429e-06	7.96513e-07	3.62051e-07	1.30339e-06	0	0	6.92725e-06	0.00477908	0.00117305	0.00125028	0.00417566	0.000767549	9.50988e-06	8.97888e-05	2.5585e-06	1.09098e-05	0.00012358	0.0123097	0.131431	Algue	Vegetables
0.53563	0.00981632	0.000355664	0.000711328	0.00128039	0.0320097	0.0469476	0.0143688	0.0221934	0.00768234	0.0746894	0.0177832	0.00284531	3.5922	0.0483703	0.106699	0.590402	0.305871	0.000640195	0.00213398	0.000355664	0.00106699	0.0711328	0.0711328	0.0967198	Choux	Vegetables
0.154037	0.000973514	0.0356134	0.0172521	0.016636	0.00283428	0.000221813	8.50284e-05	1.84844e-05	4.06658e-05	0	0.454717	0.000160199	0.00616148	0.0394335	0.0345043	0.573018	0.00246459	0.000184844	0.000714732	8.13315e-05	0.000160199	0.00616148	0.00369689	0.768554		Fruits
3.63201	0.0774619	0.794379	0.0671863	0.533538	0.059282	0.00395214	0.00102756	7.90427e-05	0.00169942	0	0	0.00158085	0.0565155	0.857613	1.97607	15.4529	0.374662	0.0059282	0.0138325	0.00371501	0.00948513	0.0434735	0.118564	0.049834	Pommes de Terre et produits	Tubers
13.5233	0.302385	2.80546	0.144473	2.65426	0.302385	0.0571171	0.0157912	0.000335983	0.00722363	0	0.335983	0.00167991	3.46062	2.90625	6.24928	60.9809	0.97939	0.0124314	0.0453577	0.0127673	0.0251987	0.839957	0.419979	0.50109	Pommes de Terre et produits	Tubers
7.05074	0.128663	0.890349	0.113224	0.720513	0.13381	0.293352	0.0596997	0.184246	0.0339671	0	0.524945	0.0190421	10.4989	1.44103	2.3674	34.9964	0.926374	0.00874909	0.0375696	0.00771979	0.0180128	0.514652	0.514652	0.140185	Pommes de Terre et produits	Tubers
0.210537	0	0.0522108	0.00078649	0.039264	0.000332746	0.000120998	2.35947e-05	5.74743e-06	6.65491e-05	0	0.000302496	0	0.00226872	0.00362995	0.0215377	0.0202672	0.0166373	6.04992e-05	0.000508193	6.04992e-05	9.67988e-05	0.000241997	0.000290396	0.0779735	Pommes de Terre et produits	Tubers
4.21235	0	1.04462	0.0157358	0.78558	0.00665745	0.00242089	0.000472074	0.000114992	0.00133149	0	0.00605223	0	0.0453917	0.0726268	0.430919	0.4055	0.332873	0.00121045	0.0101677	0.00121045	0.00193671	0.00484179	0.00581014	0.044483	Pommes de Terre et produits	Tubers
1.27181	0.0237551	0.184924	0	0.165189	0.0248515	0.0423937	0.00467793	0.0155687	0.0196619	0.0767472	0.131567	0.0101599	2.2074	0.175422	0.613978	4.02009	0.124257	0.000950204	0.00511648	0.000950204	0.00314298	0.0730926	0.0730926	0.0109974	Pommes de Terre et produits	Tubers
1.37857	0.0385506	0.285274	0.0181959	0.26677	0.0339245	0.00200463	0.000539708	4.62607e-05	0.000894373	0	0.0925213	0.000616809	0.154202	0.431766	1.07942	8.24982	0.231303	0.00339245	0.0166538	0.00185043	0.00555128	0.0771011	0.0462607	0.0283081	Pommes de Terre et produits	Tubers
2.69972	0.0492649	0.340913	0.0433531	0.275884	0.0512355	0.112324	0.0228589	0.0705474	0.0130059	0	0.201001	0.00729121	4.02002	0.551767	0.906475	13.4001	0.354708	0.00335002	0.0143854	0.0029559	0.00689709	0.19706	0.19706	0.0818623	Pommes de Terre et produits	Tubers
8.69923	0.206907	1.79472	0.0114313	1.54323	0.217195	0.0285783	0.00754467	0.000617291	0.0125744	0	0.285783	0.0114313	0.285783	1.94332	4.57253	44.5821	0.743036	0.0114313	0.0354371	0.00800192	0.026292	1.14313	1.14313	0.00429892	Pommes de Terre et produits	Tubers
2.85233	0.050217	0.436553	0.00388345	0.409771	0.0562431	0.088382	0.0100434	0.0299963	0.0444588	0.140608	0.033478	0.102309	2.08903	0.388345	1.08469	7.90081	0.147303	0.00200868	0.00897211	0.00147303	0.00602604	0.133912	0.133912	0.051945	Pommes de Terre et produits	Tubers
33.846	0.389525	4.67905	0.0819428	3.81212	0.463155	1.41322	0.349148	0.694733	0.301645	0.118758	0	0.0522534	3.44397	2.76705	12.5883	81.2303	2.82643	0.0190012	0.106882	0.0142509	0.0427528	0.130633	0.296894	0.000241368	Pommes de Terre et produits	Tubers
7.86882	0.180863	1.08861	0.127718	0.9086	0.135433	0.27858	0.146576	0.0737166	0.0257151	2.09149	1.12289	0.0145719	12.0004	1.32861	4.43157	20.4006	3.03438	0.00737166	0.0222864	0.00420013	0.0205721	0.300867	0.432871	0.711328	Pommes de Terre et produits	Tubers
0.430835	0	0.106842	0.00160944	0.0803482	0.000680917	0.000247606	4.82832e-05	1.17613e-05	0.000136183	0	0.000619016	0	0.00464262	0.00742819	0.0440739	0.041474	0.0340459	0.000123803	0.00103995	0.000123803	0.000198085	0.000495212	0.000594255	0.12323	Pommes de Terre et produits	Tubers
0.0150027	5.95526e-05	0.00337847	5.61169e-05	0.00154608	0.000584074	1.25977e-05	2.63406e-06	1.03072e-06	5.26812e-06	0	0.00446645	0.000335556	0.00171786	0.00343573	0.00870384	0.0554297	0.00206144	5.15359e-05	8.24575e-05	2.29048e-05	3.09215e-05	0.000572621	0.000343573	0.0114524	Taro	Tubers
0.0513033	0.000701302	0.0111079	0.00023063	0.00635408	0.00183562	6.58941e-05	1.36495e-05	2.35336e-06	2.82403e-05	0	0.0343591	0.000160029	0.00376538	0.0084721	0.023063	0.315351	0.00658941	0.000174149	0.00024475	7.06009e-05	9.41345e-05	0.00235336	0.00141202	0.0470672	Ignames	Tubers
0.592909	0.0030993	0.143735	0.00530025	0.0606384	0.00179669	0.000193145	4.94091e-05	4.17731e-06	8.08512e-05	0	0.112293	0.000583925	0.0449173	0.0974706	0.181915	2.03026	0.05435	0.000170686	0.00269504	8.08512e-05	0.00157211	0.0224587	0.0134752	0.449173	Manioc et produits	Tubers
nrj_kcal	proteines_g	glucides_g	sucres_g	amidon_g	fibres_g	lipides_g	ags_g	agmi_g	agpi_g	retinol_mcg	beta_carotene_mcg	vitamine_e_mg	sodium_mg	magnesium_mg	phosphore_mg	potassium_mg	calcium_mg	manganese_mg	fer_mg	cuivre_mg	zinc_mg	selenium_mcg	iode_mcg	France_moy
267.524	5.0095	47.0213	28.2994	13.226	8.23646	4.2591	1.06472	1.6741	0.869236	4.33559	2659.2	1.97059	140.557	59.5235	131.611	1101.11	80.5588	0.509863	1.4636	0.28223	0.679814	25.9431	22.2879	444.177
1829.85	77.2374	203.872	81.6271	101.912	17.4549	73.5689	31.4976	27.4542	8.48091	468.114	2950.69	10.0805	2231.03	260.184	1133.39	2966.4	719.748	2.88921	8.90985	1.18413	9.25299	122.133	159.071	1586.38
14.62	6.48584	23.0641	34.6692	12.9779	47.187	5.78927	3.38034	6.0978	10.2493	0.926184	90.1214	19.5485	6.30009	22.8774	11.6122	37.1195	11.1926	17.6471	16.4268	23.8344	7.34697	21.2417	14.0113	27.9993

## Sheet: Vegetables
nrj_kcal	proteines_g	glucides_g	sucres_g	amidon_g	fibres_g	lipides_g	ags_g	agmi_g	agpi_g	retinol_mcg	beta_carotene_mcg	vitamine_e_mg	sodium_mg	magnesium_mg	phosphore_mg	potassium_mg	calcium_mg	manganese_mg	fer_mg	cuivre_mg	zinc_mg	selenium_mcg	iode_mcg	France_moy	produit_fao_v2	Classification
0.125248	0.00131149	0.0214757	0.0195085	0	0.00108198	0.000327873	0.000121313	8.19683e-06	0.000134428	0	30.4922	0.00380333	0.139346	0.0286889	0.0839356	0.688534	0.0445908	0.00023279	0.00150822	0.000167215	0.000281971	0.00360661	0.00655747	0.327873	Carottes et navets	Vegetables
0.0928399	0.0024984	0.0180358	0.00903267	0.00907702	0.00428719	0.000221751	6.20904e-05	2.95668e-06	0.000113832	0	15.5226	0.00122702	0.0465678	0.0332627	0.0635687	0.521855	0.0480461	0.00056177	0.00104962	0.000192185	0.000384369	0.00739171	0.00443503	0.147834	Patates douces	Vegetables
2.03141	0.0937574	0.343777	0.0156262	0.00281272	0.0906322	0.00625049	0.00312525	0.000625049	0.00156262	0	0.0875069	0.00609423	0.0390656	0.343777	2.34394	9.06322	0.187515	0.00359403	0.0120322	0.00265646	0.0150012	0.156262	0.156262	1.56262	Ail frais	Vegetables
0.0013433	0.00012524	0.00012221	2.01999e-05	6.05998e-06	8.58497e-05	2.01999e-05	7.40664e-06	3.26565e-07	8.41664e-06	0	0	9.7633e-05	0.000336665	0.00114466	0.00136686	0.0200989	0.00919097	5.72331e-05	5.38665e-05	2.45766e-06	3.70332e-05	3.36665e-06	9.42663e-05	0.00336665		Vegetables
0.0569422	0.00492732	0.00402621	0.00335518	0	0.00611601	0.000996967	0.000287587	8.05243e-05	0.000383449	0	3.08676	0.00189807	0.0220483	0.0456304	0.0887684	0.527242	0.17792	0.00162966	0.00251159	0.000191724	0.00086276	0.000671036	0.00421794	0.191724		Vegetables
0.053002	0.00142077	0.00922393	0.000536349	0.008686	0.00223083	0.000670831	0.000411359	7.59432e-05	0.00014714	0	0.00284787	0	0.0042718	0.033858	0.0265801	0.208844	0.0180365	0.00526856	0.00313266	7.59432e-05	0.000575902	0.000490466	0.00158215	0.0158215	Gingembre, brut	Vegetables
0.135001	0.00655383	0.0246455	0.000953641	0.000784889	0.0037086	0.000302182	7.84889e-05	2.62938e-05	0.000113809	0	0	0.000262938	0.0168751	0.02649	0.163257	0.451311	0.0311994	0.000384596	0.00164827	0.000207996	0.00110277	0.00172676	0.00588667	0.0392445	Ail frais	Vegetables
0.0282401	0.00281431	0.00163036	0.000705518	0.00019409	0.00288224	0.000518221	0.000133922	7.37543e-05	0.000302781	0	0.111602	0.000869524	0.040953	0.0374594	0.0477462	0.435732	0.0638557	0.000540541	0.00368771	6.0168e-05	0.000560921	0.000426998	0.00145568	0.00970451		Vegetables
0.00253168	3.22977e-05	0.000299446	0.000129652	0	6.45953e-05	0.000119501	3.13287e-05	4.06028e-05	3.58043e-05	0.000507535	0.000276837	1.61488e-05	0.005952	0.000369116	9.22791e-05	0.00452167	0.00124577	5.99814e-06	1.5226e-05	1.06121e-06	4.15256e-06	1.84558e-05	0.000461395	0.00461395	Oignons et échalotes	Vegetables
0.000131563	4.39877e-06	1.35962e-05	3.99888e-06	7.99776e-06	1.0797e-05	4.39877e-06	3.59899e-07	3.1991e-06	5.19854e-07	0	0.000171952	2.99916e-06	2.51929e-05	0.000103971	0.000103971	0.00127964	4.39877e-05	2.79922e-05	1.59955e-06	1.99944e-07	9.59731e-07	3.99888e-05	3.99888e-05	0.000399888	Gingembre, brut	Vegetables
0.273987	0.0208791	0.00817009	0.00817009	0	0.0684967	0.00231073	0.000569431	9.07788e-05	0.00115537	0	0.0660209	0.001568	0.495157	0.368067	0.602441	3.52387	0.354037	0.00115537	0.00552925	0.000676715	0.00239326	0.0412631	0.0206315	0.825262	Artichauts	Vegetables
0.311435	0.0314947	0.020255	0.0152205	0.00210746	0.0257578	0.00351243	0.000819566	5.85404e-05	0.00222454	0	5.12814	0.0175621	0.0292702	0.117081	0.573696	2.57578	0.24587	0.00152205	0.00749317	0.00128789	0.00573696	0.117081	0.117081	1.17081	Asperges	Vegetables
1.42011	0.0577598	0.181096	0.148091	0.00781711	0.186742	0.01216	0.00225828	0.00303999	0.00521141	0	0.955425	0.0178056	0.258399	0.651426	0.651426	5.34169	0.872911	0.00521141	0.0108571	0.00251885	0.00425598	0.0729597	0.0434284	4.34284	Aubergines	Vegetables
1.30329	0.0438488	0.217113	0.204019	0.00548111	0.0761265	0.0121802	0.00456759	0.00395858	0.00213154	0	0.0761265	0.00121802	2.74055	0.51766	0.548111	9.74419	0.730814	0.00943968	0.00883067	0.00213154	0.00883067	0.304506	0.304506	3.04506		Vegetables
0.0437044	0.00208116	0.0036569	0.00237847	0.000535156	0.00743272	0.000743272	1.48654e-05	1.48654e-05	1.48654e-05	0	0.265199	0.00121897	0.296119	0.0535156	0.032704	0.713541	0.166493	0.000475694	0.00104058	0.000118923	0.000237847	0.0297309	0.0297309	0.297309		Vegetables
0.305179	0.0281086	0.0147236	0.0147236	0	0.0200776	0.0104403	0.00267701	0.000562172	0.00240931	0	4.17614	0.0120466	0.522017	0.149913	0.682638	1.67313	0.579573	0.000669253	0.000669253	0.000669253	0.000669253	0.0172667	0.0669253	1.33851	Choux-fleurs et brocolis	Vegetables
0.200865	0.0061452	0.0311846	0.0228381	0.00431081	0.0160509	0.00183439	0.0005228	8.25474e-05	0.000843818	0	48.8864	0.00678723	2.13706	0.0733755	0.220126	1.64178	0.229298	0.00412737	0.00587004	0.000917193	0.0023847	0.00779614	0.0183439	0.917193	Carottes et navets	Vegetables
4.33827	0.0656998	0.764412	0.719569	0.0187714	0.385856	0.0312856	0.00729998	0.00625712	0.0146	0	931.269	0.0875997	4.69284	1.04285	1.98142	25.0285	2.71142	0.0187714	0.0229428	0.00417142	0.0218999	1.04285	1.04285	10.4285	Carottes et navets	Vegetables
1.65608	0.0259534	0.312677	0.247176	0.0164784	0.111229	0.010299	0.00020598	0.00020598	0.00020598	0	341.514	0.0111229	1.77143	0.411959	0.906311	9.47507	1.0299	0.00411959	0.00988702	0.0020598	0.00741527	0.411959	0.411959	4.11959	Carottes et navets	Vegetables
0.243052	0.0182533	0.0249885	0.0213769	0	0.0234267	0.00283073	0.000370923	4.88057e-05	0.00107373	0	0	9.76114e-05	4.14848	0.0649116	0.644235	1.25919	0.184485	0.00034164	0.0077113	0.00146417	0.00497818	0.0107373	0.0195223	0.976114	Champignons et truffes	Vegetables
0.0880437	0.00584326	0.00947556	0.0027637	0.000710667	0.00967297	0.000987037	0.000240837	1.97407e-05	0.000434296	0	13.5422	0.00892282	0.132263	0.0888334	0.148056	1.44897	0.300059	0.00165822	0.00335593	0.00078963	0.00240837	0.00394815	0.00157926	0.394815		Vegetables
0.172394	0.0121132	0.0205051	0.0155687	0.00379724	0.0182267	0.000569585	1.89862e-05	1.89862e-05	1.89862e-05	0	0.820203	0.00167078	0.0341751	0.0721475	0.235429	1.55687	0.132903	0.000759447	0.00193659	0.000493641	0.00117714	0.0379724	0.0379724	0.379724	Choux	Vegetables
0.0380112	0.00143176	0.00548629	0.00494146	0.000228067	0.00354771	0.00031676	6.3352e-06	6.3352e-06	6.3352e-06	0	0.0031676	5.06816e-05	0.0177386	0.0122903	0.0380112	0.329431	0.0456135	0.000152045	0.00031676	2.53408e-05	0.000190056	0.0126704	0.0126704	0.126704	Choux	Vegetables
0.107139	0.00808502	0.00907705	0.00694419	0.000892825	0.0163685	0.000744021	2.48007e-05	2.48007e-05	2.48007e-05	0	0.644818	0.000198406	0.0248007	0.036209	0.143844	0.644818	0.238087	0.000545615	0.00168645	0.000545615	0.000644818	0.0496014	0.0496014	0.496014	Choux	Vegetables
0.00978306	0.000675853	0.00079534	0.000634779	6.72119e-05	0.000821478	0.000261379	8.96158e-05	5.22759e-05	9.33498e-05	0	0.000933498	1.4936e-05	0.0022404	0.00365931	0.014936	0.100818	0.00858818	5.22759e-05	0.000100818	7.46799e-06	8.21478e-05	0.00373399	0.00373399	0.0373399	Choux-fleurs et brocolis	Vegetables
1.27128	0.108122	0.144022	0.101364	0	0.0760234	0.0126706	0.00380117	0.00295646	0.00464587	0	0.236939	0.00295646	0.211176	0.506822	1.94282	12.6706	1.09812	0.00675763	0.0160494	0.00126706	0.0118259	0.211176	0.105588	4.22352	Choux-fleurs et brocolis	Vegetables
0.00406498	0.000581904	0.000250581	5.56846e-05	5.01161e-05	0.00023666	4.17634e-05	7.51742e-06	2.22738e-06	9.7448e-06	0	0.531788	0.000278423	0.0140604	0.00529004	0.0178748	0.0890954	0.0281207	0.000103017	0.000250581	3.06265e-05	4.45477e-05	0.000648726	0.00375871	0.0278423		Vegetables
0.0138518	0.000495833	0.00189676	0.00102315	0.000141666	0.00173148	0.000196759	3.93518e-06	3.93518e-06	3.93518e-06	0	0.0587129	3.14814e-05	0.0621759	0.0086574	0.0188889	0.306944	0.0362037	6.29629e-05	4.72222e-05	2.36111e-05	7.08332e-05	0.00787036	0.00787036	0.0787036		Vegetables
0.0652253	0.00422945	0.00611487	0.00611487	0	0.00815316	0.000815316	0.000203829	0.000152872	0.000382179	0	1.59496	0.0017835	0.463711	0.0458615	0.127393	1.44719	0.271602	0.00056053	0.0021402	0.000300648	0.000392371	0.00657348	0.00152872	0.509572		Vegetables
0.181573	0.00651446	0.0299388	0.00831633	0.00124745	0.0180187	0.00207908	0.000623725	0.000346514	0.000762331	0	0.0509375	0.00783121	0.25642	0.0693028	0.263351	2.07908	0.284141	0.00110884	0.00187118	0.000762331	0.00117815	0.0693028	0.0693028	0.693028		Vegetables
0.996031	0.0478942	0.185643	0.13563	0.00762917	0.0105961	0.00635764	0.000211921	0.000211921	0.000211921	0	0.699341	0.00169537	0.105961	0.423843	1.14438	7.62917	1.14438	0.00381459	0.00974838	0.0029669	0.00762917	0.423843	0.423843	4.23843		Vegetables
0.295151	0.0355022	0.00451655	0	0.00189065	0.0367626	0.00735253	0.00136547	0.000735253	0.00462159	0	70.1641	0.0418044	0.126043	0.315108	0.315108	1.68058	2.52087	0.00850792	0.0136547	0.00147051	0.00829785	0.105036	0.105036	1.05036	Epinards	Vegetables
0.0168195	0.000771535	0.00202914	0.00169738	0.000138876	0.00200599	0.000192884	3.85767e-06	3.85767e-06	3.85767e-06	0	0.00617999	3.08614e-05	0.0169738	0.00848688	0.021603	0.246891	0.0285468	7.71535e-05	0.000154307	6.17228e-05	0.000146592	0.00771535	0.00771535	0.0771535		Vegetables
0.562216	0.0497198	0.0508672	0.0279196	0	0.0458952	0.0076492	0.000803166	0.000256248	0.00325091	0	139.215	0.00688428	0.323944	0.569866	1.12826	7.6492	2.47069	0.0152984	0.0374811	0.00137686	0.0076492	0.0891132	0.0466601	3.8246		Vegetables
0.404546	0.0143796	0.0619281	0.0536838	0.0034511	0.0402629	0.00287592	9.5864e-05	9.5864e-05	9.5864e-05	0	0.047932	0.000766912	0.191728	0.111202	0.383456	3.25938	0.61353	0.000766912	0.00153382	0.00115037	0.00115037	0.191728	0.191728	1.91728	Carottes et navets	Vegetables
0.447668	0.0140933	0.0756773	0.00236862	0.00213175	0.030792	0.00177646	5.92154e-05	5.92154e-05	5.92154e-05	0	0	0	0.0298446	0.0639526	0.331606	1.77646	0.15396	0.000829016	0.00118431	0.000473723	0.00118431	0.0275944	0.0171725	1.18431	Oignons et échalotes	Vegetables
4.62343	0.179417	0.774022	0.575054	0.0207019	0.32203	0.0172516	0.000575054	0.000575054	0.000575054	0	0.287527	0.0126512	0.287527	1.0696	4.02538	31.0529	3.68034	0.0149514	0.0276026	0.00920086	0.0241523	1.15011	1.15011	11.5011	Oignons et échalotes	Vegetables
0.0122001	0.000729001	0.00152815	0.000177866	4.50929e-05	0.000676393	0.000212939	4.25877e-05	3.50722e-06	7.76599e-05	0	1.46552	0.000861775	0.0219953	0.00330681	0.0165341	0.0994548	0.0156071	4.00825e-05	0.000776599	1.67846e-05	5.26083e-05	0.000275568	0.000100206	0.0250516		Vegetables
0.00493301	0.00022756	0.000748352	0.000481083	2.74905e-05	0.000346685	3.81812e-05	7.63624e-06	1.06907e-06	2.13815e-05	0	0.152725	0.000113016	0.00221451	0.00290177	0.00615481	0.0317668	0.00774315	5.19265e-05	0.000229087	1.32871e-05	3.20722e-05	8.55259e-05	0.000167997	0.0152725	Poireaux et autres légumes alliacés	Vegetables
1.03065	0.0468476	0.127766	0.0898622	0.0106472	0.136284	0.00851774	0.0011499	0.000127766	0.00468476	0	4.00334	0.0212944	0.247015	0.359875	0.851774	6.4309	1.09027	0.00319415	0.0144802	0.00511065	0.00425887	0.212944	0.212944	4.25887	Poireaux et autres légumes alliacés	Vegetables
0.0452913	0.00137246	0.00780589	0.00463207	0.000428895	0.00257337	0.000463207	0.000121806	3.43116e-05	0.000274493	0.00171558	1.43079	0.00247044	0.0144109	0.0204154	0.0386006	0.265915	0.01321	0.000171558	0.000686232	8.5779e-05	0.000223026	0.000171558	0.00428895	0.171558	Piments forts et piments, verts (Capsicum spp., Pimenta spp.)	Vegetables
0.17002	0.011022	0.0179401	0.0128981	0.0021106	0.0164157	0.00293138	5.86277e-05	5.86277e-05	5.86277e-05	0	0.0293138	0.000469021	0.187609	0.0726983	0.234511	2.93138	0.175883	0.000469021	0.00469021	5.86277e-05	0.000938043	0.117255	0.117255	1.17255		Vegetables
0.0273325	0.00124153	0.00438547	0.00108575	8.49715e-05	0.00212429	7.08096e-05	2.36032e-06	2.36032e-06	2.36032e-06	0	0.00118016	0.000896921	0.00377651	0.0108575	0.0415416	0.0802508	0.0179384	9.91334e-05	0.000264356	9.44127e-05	0.000231311	0.00472064	0.00472064	0.0472064		Vegetables
0.00931395	0.000204702	0.00181958	0.00109175	2.84309e-05	0.000250192	7.96064e-05	0	4.54894e-07	1.13723e-07	0	0.00284309	2.16075e-05	0.00408267	0.0016035	0.0072783	0.051403	0.0037415	5.68617e-06	2.27447e-05	5.68617e-06	3.8666e-05	0.000568617	0.000568617	0.0113723		Vegetables
0.0590351	0.00417025	0.00641176	0.00129017	0.000781922	0.0070373	0.000234577	4.69153e-05	6.51602e-06	8.34051e-05	0	0.0104256	0.000351865	0.0788439	0.0622932	0.10582	0.50434	0.0677666	0.000338833	0.00155081	0.000299737	0.00063857	0.000299737	0.000651602	0.13032	Artichauts	Vegetables
0.000585501	3.09321e-05	6.60069e-05	6.60069e-05	0	7.45685e-05	3.86651e-06	9.3901e-07	4.41887e-07	2.09896e-06	0	0.000386651	4.69505e-06	6.90449e-05	0.000331415	0.000751208	0.00649022	0.000240276	6.62831e-06	8.83774e-06	2.23705e-06	4.41887e-06	5.52359e-06	4.14269e-06	0.00276179	Aubergines	Vegetables
0.175002	0.00824243	0.0237717	0.00955644	0.0010751	0.0268775	0.00149319	2.98639e-05	2.98639e-05	2.98639e-05	0	0.0149319	0.000716733	0.203074	0.0776461	0.334476	2.98639	0.238911	0.00119456	0.00167238	0.000657005	0.00197102	0.0597278	0.0597278	0.597278		Vegetables
0.0351991	0.0039848	0.00183744	0.000553444	0.000177102	0.00436114	0.000553444	0.000221378	1.90385e-05	0.000219164	0	0.66192	0.000354204	0.0110689	0.0270081	0.0730547	0.571155	0.0221378	0.000376342	0.00177102	0.000139468	0.000464893	0.0051581	0.00320998	0.221378	Champignons et truffes	Vegetables
0.0028513	0.000312851	0.000134645	0.000134645	0	0.000229688	3.80174e-05	4.83137e-06	1.74246e-06	1.26725e-05	0	0.0285922	8.23709e-05	0.00150485	0.00173454	0.00605902	0.0282754	0.00363541	3.16811e-05	6.01941e-05	4.67297e-06	3.16811e-05	4.75217e-05	6.33623e-05	0.00792028	Choux-fleurs et brocolis	Vegetables
0.0262714	0.00210382	0.00299715	0.00116292	0.000528599	0.00208796	0.000211439	3.70019e-05	1.00434e-05	0.000121578	0	0.237869	0.000470453	0.00872188	0.0124221	0.0403849	0.230469	0.0170737	0.00015858	0.000607888	3.27731e-05	0.000227297	0.000581459	0.00013215	0.0528599	Choux	Vegetables
0.00475943	0.000434484	0.000373126	5.30668e-05	0.000320059	0.000393026	8.29168e-05	1.06134e-05	3.48251e-06	4.31168e-05	0	0.933644	0.000409609	0.0110611	0.00870627	0.00749568	0.0835802	0.018905	0.000215584	0.00059866	1.65834e-05	0.000135984	1.65834e-05	0.000563834	0.0165834	Epinards	Vegetables
0.0411708	0.00480042	0.00158875	0.000683333	0.0003075	0.0041	0.000854166	0.000138375	2.22083e-05	0.00035875	0	10.045	0.00213542	0.550083	0.129833	0.0751666	0.591083	0.216958	0.001025	0.00392917	0.0003075	0.000785833	0.00230625	0.00476625	0.170833	Epinards	Vegetables
0.0073203	0.000212345	0.00131318	0.00106172	0.000192787	0.000530861	2.79401e-05	3.07341e-06	1.6764e-06	1.48082e-05	0	0	8.38202e-06	0.0117348	0.00265431	0.0107569	0.066218	0.011176	2.79401e-05	0.00011176	1.76022e-05	6.98502e-05	0.000349251	0.0001397	0.0279401	Carottes et navets	Vegetables
0.0570742	0.00217288	0.0094158	0.00217288	0.000260745	0.00434575	0.000289717	0	2.02802e-05	0.000108644	0	0.302754	0.000622891	0.463547	0.0176727	0.0478033	0.315791	0.0422987	0.000217288	0.000651863	0.000114438	0.000318689	0.0144858	0.0144858	0.144858	Artichauts	Vegetables
0.00531622	0.000463794	0.00035197	0.00035197	0	0.000564619	7.51603e-05	9.89916e-06	2.56645e-06	1.39322e-05	0	0.058845	2.93309e-05	0.0047296	0.00329972	0.00599449	0.0423464	0.0176352	3.1164e-05	0.000170486	8.98258e-06	4.03299e-05	0.000340971	5.49954e-05	0.0183318	Choux	Vegetables
0.02474	0.0022595	0.00204499	0.00175897	0.000120125	0.00214509	0.000386116	0.000121555	1.71607e-05	0.00024311	0	0.70502	0.00105824	0.416148	0.0121555	0.0500521	0.203069	0.022595	0.00022881	0.00155877	0.000108685	0.000600625	0.000286012	0.00100104	0.143006	Asperges	Vegetables
0.0124655	0.000833252	0.00136653	0.000833252	5.99941e-05	0.00109989	0.000176649	2.59975e-05	1.93314e-05	9.66572e-05	0	0.154985	0.000229978	0.0739928	0.00406627	0.0176649	0.0839918	0.00876581	3.33301e-05	0.000233311	9.99902e-06	6.66602e-05	0.000499951	0.000333301	0.0333301	Choux	Vegetables
0.0243495	0.00117101	0.00256507	0.00148699	0.000334574	0.00371749	0.000278811	0.000185874	1.46841e-05	7.80672e-05	0	0.10409	0.00079926	0.395912	0.0148699	0.0613385	0.522307	0.0542753	0.000204462	0.000836434	7.43497e-05	0.000260224	0.00185874	0.000371749	0.185874		Vegetables
0.237141	0.027259	0.00855663	0	0.00244475	0.0305594	0.00452279	0.000794545	7.33426e-05	0.00330042	0	0.122238	0	3.06816	0.0592852	0.574517	0.881333	0.271368	0.000330042	0.0110014	0.00207804	0.00537846	0.00611188	0.0305594	1.22238	Champignons et truffes	Vegetables
0.0289618	0.00129294	0.00439599	0.00103435	0.00258587	0.00258587	0.000155152	7.24045e-05	1.13778e-05	5.79236e-05	0	0.0196526	0.00044477	0.243072	0.00920571	0.0341335	0.178942	0.0217213	0.000155152	0.000465457	8.17136e-05	0.000227557	0.00062061	0.00020687	0.103435		Vegetables
0.0332866	0.001037	0.00439127	0.00384076	0.000230445	0.00409681	0.000320063	6.40126e-06	6.40126e-06	6.40126e-06	0	0.197159	0.000358471	0.00320063	0.00985794	0.0217643	0.20484	0.00793756	8.96177e-05	0.000281655	5.12101e-05	0.000140828	0.0128025	0.0128025	0.128025	Piments forts et piments, verts (Capsicum spp., Pimenta spp.)	Vegetables
0.068853	0.00366155	0.00939267	0.00939267	0	0.00477593	0.000795989	0.000115418	5.17393e-05	0.000437794	0	1.0507	0.00198997	0.00795989	0.0397994	0.071639	0.660671	0.0358195	0.000477593	0.00183077	0.000258696	0.000477593	0	0.00397994	0.397994	Piments forts et piments, verts (Capsicum spp., Pimenta spp.)	Vegetables
0.0776146	0.00224786	0.0126813	0.010179	0.000381711	0.00678598	0.000530155	1.06031e-05	1.06031e-05	1.06031e-05	0	1.17482	0.00731613	0.00530155	0.0173891	0.0402917	0.381711	0.010179	0.000169649	0.00044533	8.48247e-05	0.000296887	0.0212062	0.0212062	0.212062	Piments forts et piments, verts (Capsicum spp., Pimenta spp.)	Vegetables
1.26767	0.0440383	0.220192	0.188736	0.00566207	0.0692031	0.00943678	0.00314559	0.000660575	0.00346015	0	6.57429	0.0283103	0.534751	0.440383	0.817855	5.66207	0.283103	0.00314559	0.0141552	0.000314559	0.00629119	0	0.0314559	3.14559	Piments forts et piments, verts (Capsicum spp., Pimenta spp.)	Vegetables
0.0931396	0.00299833	0.0176072	0.0137158	0.000574148	0.00382765	0.000478457	1.59486e-05	1.59486e-05	1.59486e-05	0	0.00797428	0.000127588	0.0733634	0.0318971	0.102071	0.956913	0.124399	0.000191383	0.000733634	3.18971e-05	0.000478457	0.0318971	0.0318971	0.318971		Vegetables
0.0471954	0.00415452	0.000997085	0.000764432	0.000222682	0.0103032	0.000664723	0.000159534	1.32945e-05	0.000292478	0	4.98543	0	0.0731196	0.0498543	0.0930613	1.04362	0.172828	0.00139592	0.0027586	0.000329038	0.00262566	0.00199417	0.00132945	0.332362		Vegetables
0.242521	0.0084061	0.0439629	0.0326582	0.000869596	0.0123193	0.00115946	0.000183581	0.000140102	0.000454122	0	0.0966218	0.000289865	0.292281	0.0917907	0.184065	1.5846	0.106767	0.0022223	0.00338176	0.000473447	0.00260879	0.000966218	0.00241555	0.483109		Vegetables
0.00519117	0.000338555	0.000827578	0.000526641	3.38555e-05	0.000206895	2.06895e-05	2.6332e-06	1.50469e-06	9.96856e-06	0	0.00394981	9.78047e-05	0.00394981	0.00357363	0.00846387	0.0639492	0.00470215	2.6332e-05	7.52344e-05	2.44512e-05	5.83067e-05	0.00188086	0.00188086	0.0188086	Choux	Vegetables
0.017076	0.00101916	0.0022408	0.0022408	0	0.00175485	6.07447e-05	7.42435e-06	4.72459e-06	2.90225e-05	0	0.0134988	8.09929e-05	0.0188983	0.0079643	0.0222731	0.176835	0.0368518	0.000107991	0.000445461	2.2948e-05	9.44917e-05	0.000998913	0.00091117	0.0674941	Choux	Vegetables
0.122599	0.00348907	0.0235175	0.00636129	0.000346979	0.00501193	0.000481916	9.63832e-06	9.63832e-06	9.63832e-06	0	0.00481916	7.71065e-05	0.00963832	0.0144575	0.0886725	0.424086	0.0183128	0.000154213	0.00023132	0.000134936	0.000385533	0.0192766	0.0192766	0.192766	Oignons et échalotes	Vegetables
0.166052	0.0197681	0.00494202	0	0.00177913	0.0227333	0.00247101	4.94202e-05	4.94202e-05	4.94202e-05	0	32.4197	0.00217449	0.0247101	0.187797	0.296521	3.26173	0.405246	0.00276753	0.00395362	0.000988404	0.00138377	0.0988404	0.0988404	0.988404		Vegetables
0.0428392	0.00323906	0.00447796	0.00349281	0.000268678	0.00328384	0.000701548	9.10519e-05	1.19412e-05	0.000268678	0	0	1.49265e-05	0.00298531	0.0179119	0.129861	0.531385	0.00895593	0.000179119	0.00259722	0.000746327	0.00129861	0.0177626	0.0149265	0.149265	Champignons et truffes	Vegetables
0.00832175	0.00057322	0.000578248	0.000470141	0	0.00106347	0.000196102	0.000125706	5.53107e-06	6.53672e-05	0	0.0751723	1.50847e-05	0.00125706	0.00251412	0.0134506	0.112884	0.00209426	7.03954e-05	0.000884971	9.80508e-05	0.000211186	0.000226271	0.00082966	0.0251412	Champignons et truffes	Vegetables
0.00134929	0.000174031	5.5073e-06	2.42321e-06	0	0.000184495	2.97394e-05	8.81168e-06	1.59712e-06	1.32175e-05	0	0	2.75365e-06	0.00115653	0.00104639	0.0106842	0.022635	0.00236814	3.24931e-05	6.60876e-05	3.4696e-05	0.000111798	0.00012832	7.98559e-05	0.0055073	Champignons et truffes	Vegetables
0.0115114	0.000912976	0.000793892	0.000764121	2.729e-05	0.000893129	0.000322519	4.96183e-05	1.98473e-05	0.000129007	0	0.148359	7.93892e-05	0.00198473	0.0511068	0.0312595	0.193511	0.021832	0.000173664	0.00119084	6.45037e-05	9.92365e-05	0.000446564	0.000198473	0.0496183		Vegetables
0.00088659	0.000106391	5.21523e-05	2.46854e-05	0	8.34437e-05	1.25166e-05	2.15563e-06	1.07782e-06	4.17219e-06	0	0.00100828	0	0.000469371	0.000625828	0.00417219	0.0146027	0.000173841	3.82451e-06	4.06788e-05	8.34437e-06	2.67715e-05	8.101e-05	5.04139e-05	0.00347682	Champignons et truffes	Vegetables
0.12988	0.00552681	0.0178516	0.0154751	0.000994826	0.0149224	0.000829022	2.76341e-05	2.76341e-05	2.76341e-05	0	0.013817	0.00353716	0.0386877	0.0353716	0.105009	0.663218	0.232126	0.000442145	0.00105009	0.000386877	0.000386877	0.0552681	0.0552681	0.552681	Choux	Vegetables
0.0187964	0.00174098	0.00123255	0.000770343	0.000462206	0.00308137	7.70343e-05	3.08137e-05	2.15696e-05	4.62206e-05	0	0.0215696	0.00049302	0.0895139	0.015715	0.0266539	0.415985	0.0662495	0.000215696	0.000308137	0.00024651	0.000277324	0.00277324	0.0154069	0.154069		Vegetables
0.434835	0.0523631	0.00665964	0.00665964	0	0.0483151	0.0113606	0.0020893	0	0.00483151	0	94.5408	0.0462258	1.26664	1.07077	0.652906	3.94355	1.99789	0.00940185	0.0255939	0.0020893	0.00639848	0.130581	0.130581	1.30581	Epinards	Vegetables
0.504389	0.0583199	0.0595021	0	0.00236432	0.0118216	0.00788107	0.00236432	0.00210162	0.00236432	0	0.0328378	0.000525405	0.144486	0.183892	1.83892	7.09297	0.0354648	0.000656756	0.00407189	0.0051227	0.0106394	0.131351	0.131351	1.31351	Champignons et truffes	Vegetables
0.0857914	0.00167028	0.0169558	0.00607373	0.000227765	0.0045553	0.000379608	6.3268e-05	0.00013919	5.94719e-05	0	0	0.00126536	0.0126536	0.0366955	0.0873099	0.464387	0.0468183	0.000366955	0.000733909	0.00017715	0.000328994	0.0126536	0.0126536	0.126536		Vegetables
0.00173065	8.24119e-05	0.000207403	5.49413e-05	1.23618e-05	0.000178559	1.71691e-05	3.43383e-07	3.43383e-07	3.43383e-07	0	0.000734839	2.88442e-05	0.0201222	0.00137353	0.00178559	0.00961472	0.00247236	3.43383e-06	2.47236e-05	4.12059e-06	1.37353e-05	0.000686766	0.000686766	0.00686766	Artichauts	Vegetables
0.0452512	0.00448216	0.00433896	0.0024344	0.0002864	0.00276376	0.000615761	0.000101672	0	0.00038664	0	0.428168	5.72801e-05	0.00716001	0.017184	0.184728	0.516952	0.032936	0.00024344	0.001432	0.00032936	0.000572801	0	0.0020764	0.1432	Champignons et truffes	Vegetables
0.0258503	0.00191484	0.00218838	0.00218838	0	0.00410322	0.000136774	2.73548e-05	0	6.8387e-05	0	0.408954	0.000779611	0.00957418	0.0166864	0.0410322	0.246193	0.0492386	0.000232516	0.000410322	8.61676e-05	0.000273548	0.00318683	0.00198322	0.136774		Vegetables
0.00590918	0.000211367	0.000968196	0.000897741	7.04556e-05	0.000409097	4.09097e-05	6.59101e-06	6.13645e-06	2.15912e-05	0	0.000227276	5.45463e-05	0.00113638	0.00227276	0.00931832	0.0490916	0.00409097	2.20458e-05	4.09097e-05	6.59101e-06	2.72731e-05	0.00227276	0.00227276	0.0227276		Vegetables
0.00874332	0.000773448	0.000924775	0.000661354	0.000100884	0.000588493	0.000112094	1.73746e-05	9.52798e-06	5.04422e-05	0	1.50206	6.16516e-05	0.0285839	0.00980821	0.0211857	0.139557	0.0484246	9.52798e-05	0.000381119	1.17699e-05	9.52798e-05	0.000162536	0.000168141	0.0560469	Choux	Vegetables
0.00473547	0.000353734	0.000342323	0.000339471	0	0.000599066	8.55808e-05	1.14108e-05	3.42323e-06	4.56431e-05	0	1.49196	3.7085e-05	0.00228216	0.00399377	0.00855808	0.0704616	0.00941389	4.56431e-05	0.000276711	1.36929e-05	6.5612e-05	0.000285269	0.000356587	0.0285269		Vegetables
0.308381	0.00793106	0.0664614	0.0331421	0	0.0081526	0.00040763	6.91199e-05	5.67138e-05	0.000159507	0	0.00974768	0.000159507	0.150646	0.081526	0.268504	1.43557	0.227741	0.00123175	0.00137354	0.000372184	0.00167483	0.00487384	0	0.0886152	Oignons et échalotes	Vegetables
0.00711741	0.000620059	0.000820312	0.000820312	0	0.000410156	6.0317e-05	2.41268e-08	2.41268e-08	2.41268e-08	0	0.00120634	2.29205e-05	0.00412569	0.00386029	0.0103745	0.0289522	0.00386029	2.89522e-05	0.000106158	2.41268e-05	7.72058e-05	0.0060317	0.00241268	0.0241268		Vegetables
0.00210148	0.000193336	0.000228161	0.000138097	2.16152e-05	0.000150106	1.80127e-05	4.92347e-06	4.80339e-07	9.36661e-06	0	0.000960678	7.56534e-05	0.00889828	0.000420296	0.00321827	0.0235366	0.00204144	1.68119e-05	2.88203e-05	1.17683e-05	6.72474e-05	0.00120085	0.00120085	0.0120085		Vegetables
0.0749202	0.00434882	0.0105491	0.00637252	0.000775037	0.00495162	0.000775037	9.90325e-05	2.71263e-05	0.000378907	0	1.28742	0.000947267	0.0408186	0.0375893	0.101616	0.770731	0.0749202	0.000818094	0.00185148	0.000124867	0.000904209	0.000645864	0.00258346	0.430576		Vegetables
0.173705	0.0189607	0.0144346	0.00899106	0.00110095	0.0183491	0.0006728	0.000110095	4.89309e-05	0.0003364	0	3.65147	0.0080736	0.146793	0.122327	0.3364	1.10095	0.311935	0.0020184	0.00373098	0.000263004	0.00183491	0.0611637	0.0611637	0.611637	Choux-fleurs et brocolis	Vegetables
0.0382389	0.00325209	0.00377029	0.00185834	0.000160818	0.00366307	0.000348439	7.2368e-05	2.6803e-05	0.000178686	0	0.495855	0.000455651	0.0134015	0.0160818	0.0500322	0.259095	0.0232292	0.000187621	0.000428848	3.03767e-05	0.000214424	0.00893432	0.00893432	0.0893432	Choux	Vegetables
0.00120568	3.08845e-05	0.000243512	7.60234e-05	3.5636e-06	4.15753e-05	4.35551e-06	9.89888e-07	1.38584e-06	6.73124e-07	0	0	0	7.9191e-05	0.000277169	0.000574135	0.00231634	5.93933e-05	3.95955e-06	8.71101e-06	1.7818e-05	2.6331e-05	0.000197978	0.000197978	0.00197978	Champignons et truffes	Vegetables
0.0626415	0.00581349	0.00473191	0.00461925	4.73191e-05	0.00360527	0.00148717	0.000193783	0.000110411	0.000721054	0	3.19968	0.000968916	0.0608389	0.105905	0.117171	0.831465	0.360527	0.000721054	0.00328981	0.00017125	0.00105905	0.00525017	0.00326727	0.225329		Vegetables
0.0198084	0.00226171	0.00110868	0.00110868	0	0.00199562	0.000251301	4.2869e-05	2.36518e-05	0.000101999	0	3.76951	0.000133042	0.0317822	0.0155215	0.0502602	0.440516	0.09239	0.000221736	0.000990421	3.54778e-05	0.000266083	0.0147824	0.0147824	0.147824	Choux	Vegetables
0.0219964	0.000773948	0.00369662	0.00236258	0.000183303	0.0017312	0.000112019	1.22202e-05	2.03671e-05	4.48075e-05	0	0.212836	0.000437892	0.17923	0.0437892	0.0234221	0.399194	0.0733214	0.000132386	0.000743397	8.04498e-05	0.000183303	0.0101835	0.0101835	0.101835		Vegetables
0.0879273	0.00262862	0.016166	0.00499437	0.000236576	0.0038115	0.000525723	0.000157717	0.000157717	0.000144574	0	0.00695269	5.25723e-05	0.00328577	0.0144574	0.0630868	0.354863	0.0289148	0.000157717	0.000328577	0.000118288	0.000354863	0.0131431	0.0131431	0.131431	Oignons et échalotes	Vegetables
0.474966	0.0149099	0.0326635	0.0184453	0.0122969	0.0253623	0.0261308	0.0166776	0.00591787	0.0013834	0	7.99296	0.00330478	1.93676	0.13834	0.322793	1.99824	0.36122	0.0013834	0.00514931	0.000922265	0.00253623	0.0768554	0.0768554	0.768554		Vegetables
0.0143522	0.00124585	0.00137044	0.000822261	8.97012e-05	0.00119103	0.000189369	3.63788e-05	1.34552e-05	6.97676e-05	0	0.104153	0.000214286	0.00395184	0.00607975	0.0164452	0.108638	0.0433556	7.4751e-05	0.000448506	3.93689e-05	0.000109635	0.0049834	0.0049834	0.049834	Choux-fleurs et brocolis	Vegetables
0.157843	0.00440959	0.0253552	0.0240523	0.000901962	0.0155338	0.000751635	2.50545e-05	2.50545e-05	2.50545e-05	0.0526145	30.3661	0.00581265	0.260567	0.0420916	0.125273	1.15251	0.150327	0.00050109	0.00160349	0.000300654	0.00115251	0.050109	0.050109	0.50109	Carottes et navets	Vegetables
0.0168423	0.00155947	0.00194934	0	0.000140352	0.00155947	0	0	0	0	0	0.233141	0.000124758	0.014815	0.00951277	0.0257313	0.201172	0.0194934	0.000132555	0.000483436	4.91233e-05	0.000163744	0.00181678	0.00113062	0.0779735		Vegetables
0.0115656	0.000609417	0.00125887	0.000938591	8.00694e-05	0.00178377	8.00694e-05	0	5.78279e-06	2.98036e-05	0	0.0929695	0.000191277	0.0242432	0.00542693	0.0146794	0.0969729	0.0222415	6.67245e-05	0.000222415	3.51416e-05	9.78626e-05	0.0044483	0.0044483	0.044483		Vegetables
0.00267236	0.000270535	0.000223246	0.00016496	1.97952e-05	0.000236443	2.96929e-05	7.58817e-06	7.69815e-07	1.75958e-05	0	0.0328821	1.75958e-05	0.000423398	0.00134168	0.00940274	0.0293629	0.00246341	1.86955e-05	0.000109974	6.92833e-06	2.30944e-05	0.000256238	0.000159462	0.0109974	Asperges	Vegetables
0.0101343	0.000849243	0.000574654	0.000452929	5.09546e-05	0.00121725	0.000226465	7.64318e-05	5.09546e-05	7.3601e-05	0	0.0229579	0.00020948	0.000707702	0.00368005	0.0155694	0.073601	0.00905859	5.37854e-05	0.000150033	1.4154e-05	9.05859e-05	0.00283081	0.00283081	0.0283081	Choux-fleurs et brocolis	Vegetables
0.0212023	0.00204656	0.00204656	0.00153901	0.000147352	0.00147352	0.000245587	5.73036e-05	4.91174e-06	0.000139166	0	0.244768	0.00013098	0.0063034	0.00597595	0.0347915	0.138347	0.0135891	0.000139166	0.000507547	5.15733e-05	0.000171911	0.00190739	0.001187	0.0818623	Asperges	Vegetables
0.000601848	2.88027e-05	4.72881e-05	3.82603e-05	3.69707e-06	0.000105753	1.03174e-05	1.76256e-06	3.5681e-07	4.08397e-06	0	0.0128538	2.19245e-05	0.0438489	0.00323708	0.000838288	0.00511571	0.00147453	3.00924e-05	0.000210217	3.00924e-06	2.06348e-05	0.000100165	0	0.00429892		Vegetables
0.0308553	0.00192196	0.00270114	0.00062334	9.35009e-05	0.00114279	0.00114279	0.00062334	8.31119e-05	0.000425949	0	0.108565	0.000223363	0.150121	0.00633729	0.0171418	0.11324	0.0151679	7.79174e-05	0.000233752	4.10365e-05	0.000114279	0.0051945	0.0051945	0.051945	Epinards	Vegetables
0.000615487	7.60308e-05	2.53436e-05	7.16862e-06	0	8.76165e-05	3.93429e-06	7.96513e-07	3.62051e-07	1.30339e-06	0	0	6.92725e-06	0.00477908	0.00117305	0.00125028	0.00417566	0.000767549	9.50988e-06	8.97888e-05	2.5585e-06	1.09098e-05	0.00012358	0.0123097	0.000241368	Algue	Vegetables
0.53563	0.00981632	0.000355664	0.000711328	0.00128039	0.0320097	0.0469476	0.0143688	0.0221934	0.00768234	0.0746894	0.0177832	0.00284531	3.5922	0.0483703	0.106699	0.590402	0.305871	0.000640195	0.00213398	0.000355664	0.00106699	0.0711328	0.0711328	0.711328	Choux	Vegetables
nrj_kcal	proteines_g	glucides_g	sucres_g	amidon_g	fibres_g	lipides_g	ags_g	agmi_g	agpi_g	retinol_mcg	beta_carotene_mcg	vitamine_e_mg	sodium_mg	magnesium_mg	phosphore_mg	potassium_mg	calcium_mg	manganese_mg	fer_mg	cuivre_mg	zinc_mg	selenium_mcg	iode_mcg	France_moy
29.5092	1.33309	4.26157	2.95095	0.17526	2.28925	0.300505	0.0761489	0.0533427	0.0828634	0.129527	1827.09	0.411147	35.0849	11.4026	29.2335	203.122	29.0127	0.154349	0.363584	0.0650687	0.210724	5.94804	5.89126	83.8668
1829.85	77.2374	203.872	81.6271	101.912	17.4549	73.5689	31.4976	27.4542	8.48091	468.114	2950.69	10.0805	2231.03	260.184	1133.39	2966.4	719.748	2.88921	8.90985	1.18413	9.25299	122.133	159.071	1586.38
1.61266	1.72597	2.09032	3.61516	0.171973	13.1152	0.408467	0.241761	0.194297	0.977058	0.02767	61.9208	4.07862	1.57258	4.3825	2.57929	6.84741	4.03096	5.34227	4.08069	5.49506	2.27736	4.87015	3.70354	5.28666

## Sheet: Tubers
nrj_kcal	proteines_g	glucides_g	sucres_g	amidon_g	fibres_g	lipides_g	ags_g	agmi_g	agpi_g	retinol_mcg	beta_carotene_mcg	vitamine_e_mg	sodium_mg	magnesium_mg	phosphore_mg	potassium_mg	calcium_mg	manganese_mg	fer_mg	cuivre_mg	zinc_mg	selenium_mcg	iode_mcg	France_moy	produit_fao_v2	Classification
3.63201	0.0774619	0.794379	0.0671863	0.533538	0.059282	0.00395214	0.00102756	7.90427e-05	0.00169942	0	0	0.00158085	0.0565155	0.857613	1.97607	15.4529	0.374662	0.0059282	0.0138325	0.00371501	0.00948513	0.0434735	0.118564	3.95214	Pommes de Terre et produits	Tubers
13.5233	0.302385	2.80546	0.144473	2.65426	0.302385	0.0571171	0.0157912	0.000335983	0.00722363	0	0.335983	0.00167991	3.46062	2.90625	6.24928	60.9809	0.97939	0.0124314	0.0453577	0.0127673	0.0251987	0.839957	0.419979	16.7991	Pommes de Terre et produits	Tubers
7.05074	0.128663	0.890349	0.113224	0.720513	0.13381	0.293352	0.0596997	0.184246	0.0339671	0	0.524945	0.0190421	10.4989	1.44103	2.3674	34.9964	0.926374	0.00874909	0.0375696	0.00771979	0.0180128	0.514652	0.514652	5.14652	Pommes de Terre et produits	Tubers
0.210537	0	0.0522108	0.00078649	0.039264	0.000332746	0.000120998	2.35947e-05	5.74743e-06	6.65491e-05	0	0.000302496	0	0.00226872	0.00362995	0.0215377	0.0202672	0.0166373	6.04992e-05	0.000508193	6.04992e-05	9.67988e-05	0.000241997	0.000290396	0.0604992	Pommes de Terre et produits	Tubers
4.21235	0	1.04462	0.0157358	0.78558	0.00665745	0.00242089	0.000472074	0.000114992	0.00133149	0	0.00605223	0	0.0453917	0.0726268	0.430919	0.4055	0.332873	0.00121045	0.0101677	0.00121045	0.00193671	0.00484179	0.00581014	1.21045	Pommes de Terre et produits	Tubers
1.27181	0.0237551	0.184924	0	0.165189	0.0248515	0.0423937	0.00467793	0.0155687	0.0196619	0.0767472	0.131567	0.0101599	2.2074	0.175422	0.613978	4.02009	0.124257	0.000950204	0.00511648	0.000950204	0.00314298	0.0730926	0.0730926	0.730926	Pommes de Terre et produits	Tubers
1.37857	0.0385506	0.285274	0.0181959	0.26677	0.0339245	0.00200463	0.000539708	4.62607e-05	0.000894373	0	0.0925213	0.000616809	0.154202	0.431766	1.07942	8.24982	0.231303	0.00339245	0.0166538	0.00185043	0.00555128	0.0771011	0.0462607	1.54202	Pommes de Terre et produits	Tubers
2.69972	0.0492649	0.340913	0.0433531	0.275884	0.0512355	0.112324	0.0228589	0.0705474	0.0130059	0	0.201001	0.00729121	4.02002	0.551767	0.906475	13.4001	0.354708	0.00335002	0.0143854	0.0029559	0.00689709	0.19706	0.19706	1.9706	Pommes de Terre et produits	Tubers
8.69923	0.206907	1.79472	0.0114313	1.54323	0.217195	0.0285783	0.00754467	0.000617291	0.0125744	0	0.285783	0.0114313	0.285783	1.94332	4.57253	44.5821	0.743036	0.0114313	0.0354371	0.00800192	0.026292	1.14313	1.14313	11.4313	Pommes de Terre et produits	Tubers
2.85233	0.050217	0.436553	0.00388345	0.409771	0.0562431	0.088382	0.0100434	0.0299963	0.0444588	0.140608	0.033478	0.102309	2.08903	0.388345	1.08469	7.90081	0.147303	0.00200868	0.00897211	0.00147303	0.00602604	0.133912	0.133912	1.33912	Pommes de Terre et produits	Tubers
33.846	0.389525	4.67905	0.0819428	3.81212	0.463155	1.41322	0.349148	0.694733	0.301645	0.118758	0	0.0522534	3.44397	2.76705	12.5883	81.2303	2.82643	0.0190012	0.106882	0.0142509	0.0427528	0.130633	0.296894	11.8758	Pommes de Terre et produits	Tubers
7.86882	0.180863	1.08861	0.127718	0.9086	0.135433	0.27858	0.146576	0.0737166	0.0257151	2.09149	1.12289	0.0145719	12.0004	1.32861	4.43157	20.4006	3.03438	0.00737166	0.0222864	0.00420013	0.0205721	0.300867	0.432871	8.5717	Pommes de Terre et produits	Tubers
0.430835	0	0.106842	0.00160944	0.0803482	0.000680917	0.000247606	4.82832e-05	1.17613e-05	0.000136183	0	0.000619016	0	0.00464262	0.00742819	0.0440739	0.041474	0.0340459	0.000123803	0.00103995	0.000123803	0.000198085	0.000495212	0.000594255	0.123803	Pommes de Terre et produits	Tubers
0.0150027	5.95526e-05	0.00337847	5.61169e-05	0.00154608	0.000584074	1.25977e-05	2.63406e-06	1.03072e-06	5.26812e-06	0	0.00446645	0.000335556	0.00171786	0.00343573	0.00870384	0.0554297	0.00206144	5.15359e-05	8.24575e-05	2.29048e-05	3.09215e-05	0.000572621	0.000343573	0.0114524	Taro	Tubers
0.0513033	0.000701302	0.0111079	0.00023063	0.00635408	0.00183562	6.58941e-05	1.36495e-05	2.35336e-06	2.82403e-05	0	0.0343591	0.000160029	0.00376538	0.0084721	0.023063	0.315351	0.00658941	0.000174149	0.00024475	7.06009e-05	9.41345e-05	0.00235336	0.00141202	0.0470672	Ignames	Tubers
0.592909	0.0030993	0.143735	0.00530025	0.0606384	0.00179669	0.000193145	4.94091e-05	4.17731e-06	8.08512e-05	0	0.112293	0.000583925	0.0449173	0.0974706	0.181915	2.03026	0.05435	0.000170686	0.00269504	8.08512e-05	0.00157211	0.0224587	0.0134752	0.449173	Manioc et produits	Tubers
nrj_kcal	proteines_g	glucides_g	sucres_g	amidon_g	fibres_g	lipides_g	ags_g	agmi_g	agpi_g	retinol_mcg	beta_carotene_mcg	vitamine_e_mg	sodium_mg	magnesium_mg	phosphore_mg	potassium_mg	calcium_mg	manganese_mg	fer_mg	cuivre_mg	zinc_mg	selenium_mcg	iode_mcg	France_moy
88.3354	1.45145	14.6621	0.635126	12.2636	1.4894	2.32296	0.618516	1.07003	0.462494	2.42761	2.88626	0.222016	38.3195	12.9842	36.5799	294.082	10.1884	0.0764053	0.321231	0.0594538	0.16786	3.48484	3.39834	65.2617
1829.85	77.2374	203.872	81.6271	101.912	17.4549	73.5689	31.4976	27.4542	8.48091	468.114	2950.69	10.0805	2231.03	260.184	1133.39	2966.4	719.748	2.88921	8.90985	1.18413	9.25299	122.133	159.071	1586.38
4.82746	1.87921	7.19182	0.778082	12.0336	8.53285	3.15753	1.9637	3.8975	5.45335	0.518593	0.0978165	2.20242	1.71757	4.99041	3.22747	9.91377	1.41555	2.64451	3.60535	5.02088	1.81411	2.85333	2.13637	4.11386

## Sheet: Fruits
nrj_kcal	proteines_g	glucides_g	sucres_g	amidon_g	fibres_g	lipides_g	ags_g	agmi_g	agpi_g	retinol_mcg	beta_carotene_mcg	vitamine_e_mg	sodium_mg	magnesium_mg	phosphore_mg	potassium_mg	calcium_mg	manganese_mg	fer_mg	cuivre_mg	zinc_mg	selenium_mcg	iode_mcg	France_moy	produit_fao_v2	Classification
0.258131	0.00202359	0.0587335	0.0587335	0	0.000888407	0.000473817	0.000217166	3.99783e-05	0.00012339	0	0.0148068	9.87118e-05	0.0228024	0.0839051	0.0450126	0.710725	0.070579	0.00720596	0.000740339	0.000148068	0.000325749	0.024678	0.00493559	0.493559	Ananas et produits	Fruits
0.286905	0.00488138	0.0240084	0.0205217	0	0.0029886	0.00239088	0.00039848	5.97719e-05	0.000209202	0	0.00996199	0.000946389	0.0261004	0.0596723	0.144449	1.31498	0.123529	7.96959e-05	0.00239088	0.000418404	0.000488138	0.0109582	0.00597719	0.996199	Citrons & Limes et produits	Fruits
0.173324	0.00162898	0.041702	0.0364892	0	0	0	0	0	0	0	0.244348	0.00325797	0.00651593	0.0270737	0.0355118	0.430052	0.041702	0.000114029	0.000325797	0.000140093	0.000110771	0.00117287	0.0176908	0.325797		Fruits
3.59029	0.0496027	0.755063	0.755063	0	0.0196836	0.0102355	0.00267697	0.00236203	0.0027557	0	0.834585	0.0118102	0.270846	0.858205	1.33061	12.1251	0.570824	0.00157469	0.00629875	0.00181089	0.00173216	0.393672	0.0314938	7.87344	Oranges	Fruits
1.74883	0.0272041	0.365312	0.326449	0	0.0077726	0.0077726	0.000932712	0.00139907	0.00155452	0	1.28248	0.00155452	0.0217633	0.512991	0.660671	7.7726	0.408061	0.000854986	0.00307018	0.000971575	0.0010493	0.194315	0.038863	3.8863	Oranges	Fruits
0.451531	0.00223438	0.105202	0.100547	0	0.00279297	0.000912371	0.000307227	5.58595e-05	0.000493425	0	0.0393809	9.30991e-05	0.0370534	0.0658211	0.0558595	1.19167	0.0600489	0.000242058	0.000791342	0.000102409	9.30991e-05	0.0465496	0.00651694	0.930991	Pommes	Fruits
0.288215	0.00366434	0.0592637	0.0592637	0	0.00147983	0.000704681	0.000387575	5.98979e-05	0.000112749	0	0.0211404	0.000281873	0.0279758	0.0557403	0.0880852	0.810383	0.0746962	0.000112749	0.00105702	0.000218451	0.000260732	0.00775149	0.00422809	0.704681	Pamplemousses et pomelos	Fruits
0.365258	0.00131957	0.0860362	0.0844527	0	0.000738961	0.000300863	0.000163627	1.58349e-05	0.000116122	0	0.0263915	0.00211132	0.0201103	0.0440737	0.0659787	0.601725	0.043757	0.000469768	0.0024808	0.000163627	0.000295584	0.0263915	0.00263915	0.527829	Jus de raisin	Fruits
0.0900509	0.00024382	0.0211311	0.0206434	0	0.000162547	0.000471386	0.000125161	9.59026e-05	8.12734e-05	0	0	0.000617678	0.0146292	0.0113783	0.0178801	0.34785	0.0178801	0.000154419	0.000162547	3.41348e-05	0.000146292	0.00495768	0.00162547	0.162547		Fruits
0.0205957	9.8328e-05	0.00496955	0.00358764	0	0.000119588	1.03643e-05	7.97254e-07	5.58078e-06	1.86026e-06	0	0.000531503	3.18902e-05	0.00265751	0.00372052	0.00664379	0.0733474	0.00318902	3.98627e-05	0.000313587	1.80711e-05	5.58078e-05	0.000810542	0.000265751	0.0265751	Prunes et prunelles	Fruits
0.18874	0.000850426	0.0438929	0.0438929	0	0.000411496	0.000301764	0.000150882	2.27695e-05	6.58394e-05	0	0.00685827	0.00183802	0.00776356	0.0213978	0.0466363	0.170085	0.0438929	0.000164599	0.00117962	1.37165e-05	6.85827e-05	0.0274331	0.0274331	0.274331	Jus de raisin	Fruits
0.0838571	0.000311798	0.0155899	0.0152617	0.000328208	0	0	0	0	0	0	0.61539	0.00172309	0.00653134	0.0234669	0.020513	0.219899	0.017395	3.28208e-05	0.000246156	3.28208e-05	3.28208e-05	0.000164104	0.00492312	0.164104	Mangues, mangoustans et goyaves	Fruits
0.0909296	0.00104277	0.0189784	0.0189784	0	0.000208554	0.000208554	2.91976e-05	2.7112e-05	5.0053e-05	0	0.00834216	0.000458819	0.00208554	0.0250265	0.0312831	0.337858	0.0187699	4.17108e-05	0.000417108	6.88228e-05	0.000104277	0.0063609	0.00125132	0.208554	Pamplemousses et pomelos	Fruits
0.441507	0.00509032	0.0923529	0.0923529	0	0.00155826	0.000862237	0.00045709	5.71362e-05	0.000176603	0	2.25428	0.0019738	0.0316846	0.0896519	0.155826	1.32972	0.050176	0.00051942	0.00155826	0.00051942	0.00051942	0.0316846	0.0103884	1.03884	Pamplemousses et pomelos	Fruits
0.129594	0.00176318	0.0268885	0.0105791	0	0.00176318	0.0012783	0.000167502	4.84874e-05	0.000374675	0	0.00881589	0.000661192	0.0925668	0.0352635	0.0396715	0.44961	0.0484874	8.81589e-05	0.000573033	0.000163094	0.000264477	0.0134442	0.00440794	0.440794	Citrons & Limes et produits	Fruits
0.00286439	4.17724e-05	0.000168084	0.000168084	0	3.97832e-05	6.96206e-06	7.95664e-07	7.95664e-07	2.28754e-06	0	0.00298374	2.18808e-05	0.000198916	0.000795664	0.00139241	0.0116366	0.00139241	1.79024e-06	8.95122e-06	2.68537e-06	7.95664e-06	0.000303347	9.9458e-05	0.0099458	Citrons & Limes et produits	Fruits
0.00125626	1.31408e-05	6.51786e-05	6.51786e-05	0	2.36535e-05	1.20896e-05	1.36665e-06	1.15639e-06	3.36406e-06	0	0.000525634	6.3076e-06	0.000551915	0.000367944	0.000525634	0.00394225	0.00063076	4.20507e-07	1.20896e-05	1.5769e-06	3.1538e-06	0.000160318	6.3076e-05	0.00525634	Citrons & Limes et produits	Fruits
0.232564	0.00327276	0.0525625	0.0495873	0	0.000743809	0.000694222	0.000213225	0.000148762	0.000173555	0	0.148762	0.000446285	0.0187936	0.0461162	0.0793396	0.609923	0.0138844	0.000247936	0.00148762	0.000247936	0.000247936	0.00247936	0.00495873	0.495873	Tangerines, mandarines, clémentines	Fruits
1.69439	0.00866253	0.388081	0.349966	0.00519752	0.00866253	0.00519752	0.000173251	0.000173251	0.000173251	0	2.9418	0.00693002	0.0318781	0.242551	0.346501	4.85102	0.187111	0.00311851	0.00277201	0.0010395	0.000866253	0.346501	0.346501	3.46501		Fruits
0.479654	0.00172183	0.112329	0.0901913	0	0.000655937	0.000245976	4.0996e-05	0.00010659	4.83753e-05	0	6.44458	0.00254175	0.0137747	0.0432918	0.0737929	0.93471	0.0942909	0.000180383	0.0031157	0.000319769	0.00040996	0.00901913	0.00163984	0.819921	Abricots	Fruits
0.0473086	0.00191851	0.00811005	0.00811005	0	0.000872048	0.000305217	7.63042e-05	2.39813e-05	7.1944e-05	0	0.313937	0.000763042	0.381521	0.0285596	0.0475266	0.616974	0.014258	0.000152608	0.000675837	0.000132987	0.000305217	0.00152608	0.000654036	0.218012	Jus de tomates	Fruits
0.0844015	0.000256992	0.0200183	0.0154195	0	0.000608665	5.81613e-05	1.35259e-06	4.05777e-06	4.05777e-06	0	0.00135259	6.76294e-05	0.00175837	0.00405777	0.00405777	0.0175837	0.00676294	4.05777e-05	0.000351673	9.06234e-05	9.46812e-05	0.00148785	0.000946812	0.135259	Poires	Fruits
0.0654971	0.000866873	0.0122004	0.00481596	0	0.000866873	0.000642128	7.38447e-05	2.27955e-05	0.000166953	0	0.00481596	0.0003018	0.113015	0.0475175	0.0211902	0.263273	0.237587	7.06341e-05	0.00118794	0.000577915	0.000545809	0.0240798	0.00513703	3.21064	Citrons & Limes et produits	Fruits
0.400298	0.00241628	0.0926242	0.088597	0	0.00241628	0.000716831	0.000104706	0	0	0.966513	0.210217	0.00781265	0.0276262	0.0430904	0.0496949	0.703944	0.0738577	0.000402714	0	0.000402714	0	0.00241628	0.0805428	0.805428		Fruits
2.41851	0.0254066	0.547219	0.527676	0	0.0302925	0.00732883	0.00102604	0	0	0	21.9376	0.0258952	0.41872	0.400643	0.591192	7.23111	0.542333	0.00977177	0.00488589	0.00244294	0.00244294	0.0244294	0.488589	4.88589		Fruits
12.0869	0.162401	2.55848	2.55848	0	0.0745446	0.0292854	0.0141102	0.00372723	0.00505839	0	6.97525	0.0532462	1.28057	2.66231	4.39281	43.9281	0.109155	0.00559085	0.0181037	0.00585708	0.0119804	0.812004	0.186362	26.6231	Oranges	Fruits
0.472041	0.00365854	0.107972	0.107972	0	0.00196312	0.000660322	0.000276621	8.92327e-05	0.000267698	0	0.0624629	0.000178465	0.046401	0.121356	0.087448	1.19572	0.0721	0.0107079	0.00160619	0.000356931	0.000651399	0.0098156	0.00892327	0.892327	Ananas et produits	Fruits
1.81924	0.00632454	0.424116	0.405515	0	0.00855673	0.00520845	0.00171135	0.000223219	0.00145092	0	0.260422	0.000372032	0.494802	0.169647	0.245169	4.20396	0.160718	0.00186016	0.011161	0.00186016	0.00186016	0.00372032	0.0372032	3.72032	Pommes	Fruits
0.0164172	7.24288e-05	0.00366972	0.00313858	0	0	2.41429e-05	0	0	0	0	0.0241429	0	0.000724288	0.000917431	0.00123129	0.017576	0.00041043	7.24288e-06	3.38001e-05	4.82858e-06	4.82858e-06	2.41429e-05	0.000265572	0.0241429		Fruits
0.0175936	5.15292e-05	0.00415914	0.00366962	0	5.15292e-05	5.88905e-05	1.84033e-06	0	0	0	0.0610989	9.93778e-05	0.000743493	0.000956971	0.0016563	0.022452	0.00287091	1.1042e-05	2.57646e-05	7.36132e-06	9.20165e-06	0.00368066	0.00368066	0.0368066	Mangues, mangoustans et goyaves	Fruits
0.015779	6.15166e-05	0.00378327	0.00356796	0	4.61375e-05	2.55294e-05	1.78398e-05	8.91991e-07	8.91991e-07	0	0.241145	8.30474e-05	0.00141181	0.00113806	0.00116882	0.0119957	0.00249142	9.22749e-06	2.46066e-05	6.15166e-06	7.68958e-06	0.00307583	0.00307583	0.0307583	Mangues, mangoustans et goyaves	Fruits
0.0237563	9.50251e-05	0.00522638	0.00513999	0	0.000142538	2.15966e-05	8.63864e-07	3.45546e-06	4.75125e-06	0	0.0552873	0.00012526	0.00188754	0.00172773	0.00259159	0.0172773	0.00215966	8.20671e-06	8.20671e-05	2.98033e-05	3.45546e-05	0.000475125	0.00239722	0.0431932	Pêches et nectarines	Fruits
0.286202	0.00208539	0.0632089	0.0632089	0	0.00129438	0.00057528	3.5955e-05	2.01348e-05	2.01348e-05	0	0.035955	0.00194157	0.0468134	0.0428584	0.0553707	0.595415	0.0552988	0.000158202	0.00100674	0.000165393	0.000294831	0.0079101	0.0079101	0.7191	Oranges	Fruits
0.483184	0.0050096	0.100192	0.094536	0.0014544	0.0087264	0.0021008	0.0013736	0	0	0	1.92304	0	0.0310272	0.09292	0.12524	1.3332	0.077972	0.0021816	0.0019392	0.0003636	0.0005656	0.0808	0.0808	0.808		Fruits
0.226466	0.0123739	0.00910535	0.00700412	0.00210124	0.0175103	0.00350206	5.83676e-05	5.83676e-05	5.83676e-05	0	4.30753	0.00560329	8.04306	0.268491	0.303512	1.40082	0.758779	0.000700412	0.00291838	0.000583676	0.00151756	0.116735	0.116735	1.16735	Concombres, cornichons	Fruits
0.0146092	0	0.000715084	0.000307563	0	0	0	0	0	0	0	0	0	0.00384454	0.00384454	0.00615126	0.0561303	0.00538235	0.000192227	0.000153782	6.15126e-06	3.07563e-05	0.00768908	0.00768908	0.0768908	Pommes	Fruits
0.336258	0.00185614	0.0694037	0.0513802	0	0.00134503	0.000807019	0	0.000457311	0	0	0.00672516	0.00277077	0.0726318	0.0322808	0.0645616	0.43041	0.0484212	0.000511112	0.00255556	8.07019e-05	0.000322808	0.0269006	0.0269006	0.269006	Raisin, moût	Fruits
1.23169	0.0217357	0.241776	0.179789	0.00483016	0.0456181	0.00670855	0.000134171	0.000134171	0.000134171	0	63.0604	0.0187839	0.0670855	0.225407	0.590353	6.97689	0.402513	0.00187839	0.0050985	0.00161005	0.00241508	0.268342	0.268342	2.68342	Abricots	Fruits
0.158409	0.00190886	0.0391714	0.022734	0.000119304	0.00550123	0.000331399	0.000125932	7.95359e-05	9.94198e-05	0	1.43165	0.00365865	0.001657	0.0271748	0.0523611	0.927918	0.0470587	0.000178956	0.000927918	0.000298259	0.00023198	0.00662799	0.00662799	0.0662799	Abricots	Fruits
1.02761	0.00472248	0.221012	0.198344	0.00340018	0.0226679	0.00472248	9.44495e-05	9.44495e-05	9.44495e-05	0	1.26373	0.000755596	0.0472248	0.283349	0.153008	2.64459	0.151119	0.0158675	0.00321128	0.00113339	0.00151119	0.188899	0.188899	1.88899	Ananas et produits	Fruits
5.78587	0.0440291	0.0234257	0.0112895	0.00508028	0.101606	0.58141	0.127289	0.347152	0.0798733	0	0.0705594	0.062939	0.169343	0.592699	1.0725	12.1362	0.265303	0.00564475	0.00959608	0.00508028	0.0121362	0.282238	0.282238	2.82238	Avocats	Fruits
11.3654	0.133119	2.47401	1.95911	0.47722	0.339077	0.031396	0.000627921	0.000627921	0.000627921	0	3.57915	0.00502337	0.31396	3.51636	3.64194	40.1869	0.640479	0.0452103	0.0251168	0.00753505	0.0175818	1.25584	1.25584	12.5584		Fruits
0.0161171	0.000300641	0.00218813	0.00218813	0	0.00131107	0.0001944	3.16464e-05	1.60493e-05	0.000103981	0	0.0226046	0.000474697	0.000565115	0.00519906	0.0120935	0.0745952	0.0129072	6.32929e-05	0.000264474	2.10223e-05	6.32929e-05	0.000248651	0.000339069	0.0226046	Cassis et groseilles	Fruits
1.92782	0.0166799	0.441429	0.409244	0	0.0328899	0.00328899	0.000610812	0.000728276	0.000822247	0	2.06736	0.00493348	0.0234928	0.187942	0.328899	2.84263	0.234928	0.00140957	0.00798754	0.00164449	0.00164449	0	0.234928	2.34928	Cerises	Fruits
0.127415	0.00115412	0.00720174	0.0036932	0	0.00115412	0.00115412	2.30825e-05	2.30825e-05	2.30825e-05	0	0.0115412	0.00018466	0.0115412	0.0364703	0.055398	0.64631	0.0507815	9.23299e-05	0.000692475	0.00018466	0.00152344	0.046165	0.046165	0.46165	Citrons & Limes et produits	Fruits
0.729208	0.00459884	0.164389	0.164389	0	0.0185478	0.000635198	0.00019056	0.000254079	5.33567e-05	0	0.226131	0.00116877	0.099091	0.12018	0.157529	1.76839	0.114082	0.000762238	0.00228671	0.000558975	0.000584383	0.00774942	0.00355711	0.254079	Dattes	Fruits
0.336062	0.00576245	0.0653723	0.0590772	0.000871631	0.0198538	0.0012106	2.4212e-05	2.4212e-05	2.4212e-05	0	0.3564	0.000193696	0.024212	0.106533	0.10169	1.11375	0.276016	0.000290544	0.00130745	0.000387391	0.000774783	0.0484239	0.0484239	0.484239	Figues	Fruits
0.270079	0.00312999	0.0568422	0.0515035	0.00530737	0.0101751	0.000910732	0.000366386	0.000188427	0.000282641	0	0.00628091	0.000366386	0.0903404	0.054958	0.0786161	0.884562	0.174819	0.000418727	0.00221926	0.000282641	0.000533877	0.0011515	0.0011515	0.104682	Figues	Fruits
1.83988	0.0300291	0.287422	0.266926	0.00857975	0.181128	0.0119163	0.000238326	0.000238326	0.000238326	0	0.119163	0.0142996	0.119163	0.571983	1.0963	6.67314	0.857975	0.012393	0.0090564	0.000953306	0.00524318	0.476653	0.476653	4.76653	Fraises	Fruits
0.404549	0.00978482	0.0479374	0.0444017	0.00148006	0.0353569	0.00657803	0.00106893	0.00131561	0.00353569	0	0.822254	0.00723583	0.0205563	0.164451	0.238454	1.39783	0.131561	0.00361792	0.00328901	0.000328901	0.00197341	0.0822254	0.0822254	0.822254	Framboises	Fruits
0.0172242	0.000363244	0.00185885	0.00144957	0.000204644	0.00115965	0.000511611	9.209e-05	8.35632e-05	0.000310377	0	0.172242	8.52685e-05	0.000426343	0.00443396	0.0078447	0.0409289	0.00138135	3.2402e-05	9.55008e-05	2.55806e-05	0.000129608	0.00170537	0.00170537	0.0170537		Fruits
0.0886988	0.00158469	0.0157369	0.0146364	0.000198087	0.00253111	0.00132058	7.70337e-05	7.70337e-05	0.00105646	0	0.0133158	4.40193e-05	0.0027512	0.0132058	0.029713	0.253111	0.0104546	0.000110048	0.000187082	0.000121053	0.000242106	0.0110048	0.0110048	0.110048		Fruits
0.0216787	0.000493705	0.00223433	0.00209825	5.6966e-05	0.0014558	0.000221534	6.64603e-05	3.48125e-05	0.000120261	0	0.00810183	0.000376608	0.000791194	0.00379773	0.0120261	0.0727898	0.0120261	4.11421e-05	0.000110767	2.8483e-05	4.74716e-05	0.00316478	0.00316478	0.0316478	Cassis et groseilles	Fruits
0.00197746	3.71703e-05	0.000241855	0.000230951	4.65867e-06	0.000199728	2.92406e-05	2.8745e-06	2.92406e-06	1.53637e-05	0	0.00183373	3.41967e-05	7.43406e-05	0.000446043	0.00129848	0.00926779	0.00125883	7.92966e-06	1.63549e-05	3.1223e-06	6.93845e-06	3.37011e-06	1.48681e-05	0.00495604	Cassis et groseilles	Fruits
2.45714	0.0357402	0.446753	0.361464	0.0073105	0.0974733	0.0243683	0.0052798	0.00649822	0.0101535	0	1.54333	0.0389893	0.101535	0.487367	1.05596	11.778	1.1778	0.00203069	0.00649822	0.00609208	0.00487367	0.406139	0.406139	4.06139	Kiwis	Fruits
0.0246722	0.000344192	0.00490397	0.00478214	5.4827e-05	0.000609189	7.61487e-05	1.52297e-06	1.52297e-06	1.52297e-06	0	0.000761487	1.21838e-05	0.000761487	0.0054827	0.00822405	0.0609189	0.00109654	3.04595e-05	7.91946e-05	6.09189e-05	7.00568e-05	0.00304595	0.00304595	0.0304595		Fruits
0.820572	0.0069954	0.158785	0.143239	0.0122142	0.0177661	0.00277595	5.55191e-05	5.55191e-05	5.55191e-05	0	9.5937	0.0227628	0.0277595	0.122142	0.133246	1.66557	0.133246	0.000777267	0.000999343	0.000777267	0.00122142	0.111038	0.111038	1.11038	Mangues, mangoustans et goyaves	Fruits
3.75849	0.0677367	0.887171	0.635406	0.0107899	0.0779272	0.014986	0.00029972	0.00029972	0.00029972	0	149.86	0.00239776	1.43866	0.959103	1.01905	22.7787	0.659384	0.00239776	0.0125882	0.00359664	0.0107899	0.59944	0.59944	5.9944	Cantaloup et autres melons	Fruits
0.0416401	0.000627848	0.00764965	0.00718778	2.16499e-05	0.001732	0.000238149	2.02066e-05	3.39182e-05	0.00010825	0	0.0230933	0.000411349	0.000721665	0.00432999	0.00865998	0.0555682	0.00432999	0.000245366	0.000202066	4.11349e-05	0.000115466	0	0.000360832	0.0721665	Myrtilles	Fruits
0.0697637	0.00166666	0.00963122	0.00899701	0.000265485	0.00766958	0.00103244	0.000103244	0.000221238	0.000634215	0	0.230087	0.0018879	0.0036873	0.0294984	0.036873	0.294984	0.0457225	0.00162241	0.000589968	0.000103244	0.000265485	0.0147492	0.0147492	0.147492		Fruits
1.46213	0.0217898	0.309479	0.240004	0.00568431	0.0315795	0.00789487	0.000157897	0.000157897	0.000157897	0	4.10533	0.0157897	0.0789487	0.211583	0.536851	6.0001	0.132634	0.00126318	0.00347374	0.00189477	0.00284215	0.315795	0.315795	3.15795	Pêches et nectarines	Fruits
0.706843	0.0056384	0.00020429	0	0	0.0253319	0.0702757	0.00849846	0.0416751	0.00616955	0	1.08274	0.0249234	2.88457	0.0653728	0.0322778	0.0776301	0.326864	0.000286006	0.0347293	0.000735443	0.000572012	0.102145	0.040858	0.40858	Olives	Fruits
0.810782	0.00685241	0	0	0.000941553	0.0188311	0.0821243	0.0121879	0.0580624	0.00789858	0	0.138617	0.0273573	6.59087	0.12554	0.0350467	0.162156	0.303389	0.000156925	0.000836936	0.000575393	0.000366159	0.0523085	0.0523085	0.523085	Olives	Fruits
6.37432	0.105071	1.12496	1.06472	0.0252171	0.378256	0.0350237	0.000700474	0.000700474	0.000700474	0	0.350237	0.026618	0.350237	2.10142	5.32361	25.2171	9.24626	0.0028019	0.0798541	0.0056038	0.0350237	1.40095	1.40095	14.0095	Oranges	Fruits
0.000689083	1.22467e-05	0.000139286	0.000132265	2.93922e-06	2.93922e-05	2.44935e-06	8.16449e-08	8.16449e-08	8.16449e-08	0	0.00573147	6.53159e-07	4.08224e-05	0.000293922	0.000142062	0.0032658	0.000359237	6.53159e-07	2.61264e-06	8.16449e-08	4.08224e-07	0.00016329	0.00016329	0.0016329	Papayes	Fruits
0.300459	0.00532948	0.06434	0.0610187	0.0013903	0.00386194	0.00193097	3.86194e-05	3.86194e-05	3.86194e-05	0	9.42314	0.000308956	0.0193097	0.0849628	0.0749217	0.772389	0.0463433	0.000154478	0.00123582	0.000231717	0.00069515	0.0772389	0.0772389	0.772389	Pastèques	Fruits
1.72393	0.0152478	0.339185	0.280372	0	0.0902418	0.00840182	0.0020849	0.00177372	0.00373414	0	0.43565	0.0127583	0.0560122	0.2561	0.479215	4.10756	0.201021	0.000933536	0.00224049	0.00220937	0.00301843	0.155589	0.0124471	3.11179	Poires	Fruits
3.83258	0.00864208	0.916812	0.777788	0.0469679	0.0574887	0.0078906	0.000638763	0.00027805	0.00191629	0	0.112723	0.00676337	0	0.191253	0.225446	3.90773	0.16683	0.00101451	0.00413317	0.00161569	0.000939357	0.187871	0.00751486	3.75743	Pommes	Fruits
7.76526	0.0363542	1.68684	1.35965	0.00727085	0.203584	0.0363542	0.00756168	0.00145417	0.0218125	0	3.11192	0.0538043	0.218125	0.940847	2.094	17.3046	0.776526	0.00523501	0.0143963	0.00596209	0.00450792	0.727085	0.0290834	14.5417	Pommes	Fruits
0.0320847	0.000201537	0.00646531	0.00532058	0.000145107	0.000644919	0.000201537	4.03074e-06	4.03074e-06	4.03074e-06	0	0.434514	3.22459e-05	0.00201537	0.00580427	0.0137045	0.112861	0.0112861	1.6123e-05	4.83689e-05	1.6123e-05	5.64304e-05	0.00806149	0.00806149	0.0806149	Pamplemousses et pomelos	Fruits
0.62595	0.00825235	0.143977	0.0913026	0.00158024	0.0149245	0.00219477	4.38955e-05	4.38955e-05	4.38955e-05	0	3.77501	0.0105349	0.0219477	0.0834014	0.175582	2.19477	0.114128	0.000702328	0.00140466	0.00087791	0.00105349	0.087791	0.087791	0.87791	Prunes et prunelles	Fruits
0.836519	0.00595426	0.202372	0.139176	0.000657526	0.0186299	0.00146117	0.000584467	0.000511409	0.000182646	0	0.0544285	0.0014977	0.0091323	0.109588	0.241093	2.22828	0.182646	0.00091323	0.00138811	0.000840171	0.00102282	0.0365292	0.00292234	0.365292	Prunes séchées	Fruits
2.71353	0.0396682	0.545006	0.500164	0.0103482	0.120729	0.0143725	0.00028745	0.00028745	0.00028745	0	0.143725	0.0109231	0.143725	0.40818	1.03482	10.3482	0.235709	0.0028745	0.00632391	0.0034494	0.00632391	0.574901	0.574901	5.74901	Pêches et nectarines	Fruits
2.19418	0.0224201	0.496232	0.463349	0.00538083	0.0298935	0.00747338	0.000149468	0.000149468	0.000149468	0	0.225397	0.00926699	0.0747338	0.227191	0.478296	5.9787	0.358722	0.00239148	0.0059787	0.00567977	0.000747338	0.298935	0.298935	2.98935		Fruits
0.807933	0.00716898	0.177518	0.17069	0.00204828	0.0159311	0.00455174	0.00147931	0.000182069	0.00136552	0	0.273104	0.00455174	0.00216207	0.0771519	0.24807	1.72966	0.102186	0.000580346	0.00227587	0.000887588	0.000432415	0.0168414	0.00455174	1.13793		Fruits
2.29768	0.0214736	0.523956	0.503198	0.00357893	0.030063	0.00644208	0.00221894	0.00243368	0.00128842	0	0.0178947	0.0119536	0.0357893	0.250525	0.586945	6.87155	0.386525	0.0020042	0.0121684	0.00271999	0.00171789	0.0715787	0.0715787	0.715787	Raisins secs	Fruits
0.00137717	4.36665e-06	0.000326939	0.000321341	1.00769e-06	2.23931e-05	5.59827e-07	1.56752e-07	1.11965e-07	2.79913e-07	0	0.000492648	2.12734e-06	1.11965e-05	0.000134358	8.95723e-05	0.00107487	0.0016235	8.17347e-07	2.35127e-06	3.02306e-07	8.95723e-07	5.76622e-05	3.35896e-06	0.00111965		Fruits
8.74192	0.0396909	1.92784	1.4232	0.00708766	0.340208	0.021263	0.00297682	0.000708766	0.00524487	0	3.54383	0.0255156	0.283506	0.708766	1.41753	14.1753	0.850519	0.00496136	0.0184279	0.0042526	0.00567013	0	0.00891061	14.1753	Pommes	Fruits
0.00349423	3.51322e-05	0.000569711	9.68509e-05	1.70913e-05	0.000422536	2.94351e-05	9.49519e-07	9.49519e-07	3.79808e-06	0	0.00569711	9.49519e-07	0.000427284	0.0073113	0.00166166	0.0166166	0.0112043	5.50721e-05	2.3738e-05	1.80409e-06	1.32933e-05	0.000949519	0.000142428	0.00949519		Fruits
0.4487	0.00575592	0.0935337	0.0909173	0.00117735	0.0222388	0.000981122	3.27041e-05	3.27041e-05	3.27041e-05	0	1.17735	0.000784898	0.016352	0.0470939	0.0850306	1.04653	0.0451316	0.000850306	0.000392449	0.000196224	0.00016352	0.0654081	0.0654081	0.654081		Fruits
0.0161428	0.000453764	0.0012609	0.000843278	7.2281e-05	0.00172671	6.02342e-05	2.00781e-06	2.00781e-06	2.00781e-06	0	0.00497936	0.000180702	0.00240937	0.00562185	0.00963747	0.0762966	0.022889	3.61405e-05	8.03122e-05	3.21249e-05	6.02342e-05	0.00401561	0.00401561	0.0401561	Citrons & Limes et produits	Fruits
0.00159433	5.09055e-05	0.000286344	0.000286344	0	6.00968e-05	1.37869e-05	9.54479e-07	1.44939e-06	7.42372e-06	0	0.00031816	3.07554e-05	0.000353511	0.000636319	0.00134334	0.00685811	0.00137869	3.88862e-05	6.53995e-05	2.12106e-06	4.24213e-06	0.000353511	1.41404e-05	0.00353511		Fruits
0.000275694	1.7387e-06	6.21513e-05	6.21513e-05	0	7.01243e-06	2.40152e-07	7.20455e-08	9.60607e-08	2.01727e-08	0	8.5494e-05	4.41879e-07	3.74637e-05	4.54367e-05	5.95576e-05	0.000668583	4.31313e-05	2.88182e-07	8.64546e-07	2.11334e-07	2.2094e-07	2.92985e-06	1.34485e-06	9.60607e-05		Fruits
0.260843	0.00185324	0.0537439	0.0509641	0	0.00741295	0.00046331	1.52892e-05	1.85324e-05	0.000111194	0	0.171425	0.00125094	0.0170961	0.0174204	0.039891	0.713497	0.0166328	0.000138993	0.000648633	0.000162158	0.000416979	0.000208489	0.00518907	0.46331	Pommes	Fruits
0.20302	0.00222464	0.0448359	0.0270502	0.000194441	0.00566167	0.00103511	0.00040032	8.57829e-05	0.000194441	0	0.0577605	0.000223036	0.00171566	0.0617637	0.0423196	0.852111	0.0125815	0.000325975	0.000657669	0.000223036	0.000348851	0.00373442	0.00171566	0.0571886		Fruits
6.00648	0.102859	1.16447	1.09209	0.0228577	0.215878	0.0317467	0.000634935	0.000634935	0.000634935	0	18.6671	0.0266673	0.317467	1.18098	2.28577	17.7782	2.9207	0.00253974	0.0114288	0.00507948	0.0126987	1.26987	1.26987	12.6987	Tangerines, mandarines, clémentines	Fruits
0.756909	0.00966266	0.145233	0.145233	0	0.0219606	0.00424572	0.000556335	0.00111267	0.00146404	0	2.78168	0.00483133	0.0439212	0.0878424	0.260599	2.18142	0.106728	0.00111267	0.00234246	0.000878424	0.00140548	0.00161044	0.00585616	1.46404	Prunes et prunelles	Fruits
2.65718	0.0150406	0.521408	0.521408	0	0.123834	0.00501354	0.000165447	0.000200542	0.00120325	0	1.85501	0.0145393	0.150406	0.350948	0.651761	7.52031	0.55149	0	0.0100271	0.00300813	0.00501354	0.0501354	0.0501354	5.01354	Poires	Fruits
1.56225	0.00742822	0.345876	0.331948	0.00417837	0.0324984	0.0111423	0.00324984	2.32132e-06	2.32132e-06	0.243738	0.554795	0.00858888	0.101674	0.109102	0.222846	2.78558	0.109102	0.000696395	0.00208919	0.000928527	0.000580329	0.580329	0.232132	2.32132		Fruits
2.06366	0.0143559	0.450415	0.450415	0	0.0620891	0.00969021	0.000466566	0.00233283	0.00179448	0	0.789573	0.00807518	0.13979	0.2602	0.482716	3.66075	0.459388	0.00574235	0.0127408	0.00132792	0.00358897	0.00538345	0.0157915	1.79448		Fruits
0.311727	0.000980431	0.0718983	0.0686302	0	0.0109356	0.000389659	7.29039e-05	1.50836e-05	0.000175975	0	0	0.000666191	0.109356	0.0131981	0.0477646	0.565633	0.0276532	0.000188544	0.00175975	0.000150836	0.000251393	0.000628482	0.00100557	0.125696	Pommes	Fruits
0.166439	0.00163711	0.0356981	0.0352433	0	0.00204639	0.000363802	0.000122783	1.59163e-05	0.000109141	0	0.0886767	0.000432015	0.00454753	0.0159163	0.0454753	0.434289	0.0227376	0.000161437	0.000818555	0.000295589	0.000159163	0.00181901	0.00170532	0.227376		Fruits
0.0092427	0.000156127	0.00158208	0.000841002	0	0.00106791	2.7062e-05	2.28986e-06	3.74704e-06	1.14493e-05	0	0.00749408	0.000249803	0.00166535	0.00124901	0.00281028	0.0205671	0.00228986	7.49408e-05	9.15943e-05	1.26983e-05	2.08169e-05	0	3.12253e-05	0.0208169	Canneberges	Fruits
0.00532465	8.24249e-05	0.00113582	0.000811061	5.6049e-06	0.000235735	1.6485e-05	1.51662e-06	5.2752e-06	6.92369e-06	0	0.000245626	7.58309e-06	0.00130231	0.0013188	0.0019782	0.0155783	0.000412125	1.10449e-05	0.000112098	1.03855e-05	9.39644e-06	0.000107647	4.6158e-05	0.0016485	Pêches et nectarines	Fruits
0.00715459	0.000193595	0.000757544	0.000584993	2.52515e-05	0.00148703	4.20858e-05	5.89201e-06	1.68343e-06	1.34675e-05	0	0.000982002	3.50715e-05	0.000841716	0.00210429	0.00168343	0.0224458	0.0187983	9.82002e-06	0.000126257	1.29063e-05	3.50715e-05	0.000982002	0.00140286	0.0140286	Citrons & Limes et produits	Fruits
0.285016	0.0013552	0.0631015	0.0605605	0.0007623	0.005929	0.0020328	0.0005929	4.235e-07	4.235e-07	0.0444675	0.101217	0.00156695	0.0185493	0.0199045	0.040656	0.5082	0.0199045	0.00012705	0.00038115	0.0001694	0.000105875	0.105875	0.04235	0.4235		Fruits
0.0926181	0.000610945	1.39485e-05	1.39485e-05	0	0.00323605	0.00928971	0.00112146	0.00630473	0.00141159	0	0.00340344	0.000716953	0.942919	0.00809013	0.0167382	0.0892704	0.0306867	7.81116e-05	0.000474249	7.53219e-05	0.000172961	0.00697425	0.0027897	0.027897	Olives	Fruits
3.38976	0.0225383	0.513873	0.504858	0.00378643	0.0554442	0.00676149	0	0.000631072	0.00274967	0	1.57768	0.0166783	0.0365121	0.739256	0.752779	9.15055	0.653611	0.015326	0.0130722	0.00320044	0.0042372	0.220875	0.0531904	4.50766		Fruits
0.00545435	0.000128338	0.000711389	0.000667134	1.88081e-05	0.000669347	8.85087e-05	6.85942e-06	6.74879e-06	5.75306e-05	0	0.00409353	0.00015489	0.00024008	0.00188081	0.00420416	0.025225	0.00330801	0.000132763	8.6296e-05	1.21699e-05	3.76162e-05	2.10208e-05	4.42543e-05	0.0110636	Framboises	Fruits
2.53551	0.0107619	0.57684	0.48644	0.0077486	0.0731812	0.00645716	0.000215239	0.000215239	0.000215239	0.452001	1.33448	0.0172191	0.107619	0.258287	0.473525	6.02669	0.266896	0.00258287	0.00107619	0.00215239	0.00107619	0.430478	0.430478	4.30478		Fruits
0.0839699	0.000839699	0.0173538	0.016794	0.00025191	0.00321884	0.000349874	1.3995e-07	1.3995e-07	1.3995e-07	0.0146947	0.0548603	0.0011056	0.00204327	0.0137711	0.019593	0.209925	0.0144148	0.00016794	0.000209925	8.11709e-05	8.53694e-05	0.00104962	0.013995	0.13995		Fruits
0.104133	0.000547073	0.0224489	0.0192419	0.000339563	0.00390497	0.000471615	1.88646e-07	1.88646e-07	1.88646e-07	0.0198078	0.0913047	0.00137712	0.00107528	0.0109226	0.024524	0.232035	0.0117715	0.000115074	0.00024524	0.000111301	9.62095e-05	0.00141485	0.0188646	0.188646		Fruits
0.0763217	0.0019676	0.0111174	0.00414696	0.00104997	0.000970565	0.00245288	0.00104997	0.000847038	0.000449989	0.0344109	0.00441166	0.000758805	0.0233818	0.04844	0.0423519	0.228524	0.0558516	0.000352933	0.00486165	0.00021176	0.000644102	0.0014382	0.00882332	0.0882332		Fruits
0.67276	0.00180075	0.151263	0.126052	0.00129654	0.021609	0.00180075	0.00028812	0.00036015	0.000497007	0	0.0180075	0.00338541	0.0180075	0.0374556	0.086436	1.08045	0.0338541	0.00036015	0.0007203	0.00043218	0.00043218	0.07203	0.07203	0.7203	Pommes	Fruits
0.14709	0.000709526	0.0305642	0.0300184	0.000245605	0.00654947	0.00098242	0.000158279	3.82052e-05	0.000272894	0	0.0518499	0.000136447	0.00272894	0.00818683	0.0218316	0.240147	0.0136447	0.000327473	0.000518499	9.55131e-05	0.000109158	0.0140541	0.00240147	0.272894	Pommes	Fruits
0.230764	0.00144952	0.0465007	0.0382674	0.00104366	0.00463847	0.00144952	2.89905e-05	2.89905e-05	2.89905e-05	0	3.12517	0.000231924	0.0144952	0.0417463	0.0985675	0.811733	0.0811733	0.000115962	0.000347885	0.000115962	0.000405866	0.0579809	0.0579809	0.579809	Pamplemousses et pomelos	Fruits
0.464107	0.00875887	0.070526	0.070526	0	0.0182003	0.00159252	0.000238878	0.000227503	0.000409506	0	7.80336	0.00147877	0	0.102376	0.204753	1.53565	0.250254	0.000250254	0.000910013	0.000364005	0.000796261	0.113752	0.113752	1.13752	Pamplemousses et pomelos	Fruits
0.00196588	4.67641e-05	0.000285946	0.000278797	2.9786e-06	0.000162334	3.51475e-05	5.06363e-06	8.04223e-06	8.93581e-06	0	0	4.46791e-06	0.000238288	0.000521256	0.000565935	0.0047062	0.00195099	4.17005e-06	1.99567e-05	2.82967e-06	3.87219e-06	0	0.00029786	0.0029786		Fruits
0.0150594	0.00028975	0.00328638	0.00313388	6.48126e-05	0.00038125	1.525e-05	4.95626e-07	6.10001e-07	3.66e-06	0	0	0.000110563	0.00038125	0.0022875	0.00648126	0.0823501	0.001525	6.48126e-06	4.19375e-05	1.83e-05	3.05e-05	0.0038125	0.0038125	0.038125		Fruits
0.196407	0.00409771	0.0303796	0.0303796	0	0.00529876	0.00120105	0.000310861	0.000105975	0.000438031	0	0.21195	0.000247275	0.170267	0.0641503	0.111627	1.67441	0.0423901	0.00024021	0.0024021	0.000233145	0.000607591	0	0	0.706501	Cantaloup et autres melons	Fruits
0.0671101	0.00147509	0.0104718	0.00983396	1.72759e-05	0.00704324	0.000411963	0	7.17613e-05	0	0	0.0657812	0.000890372	0.00398674	0.0224586	0.0433226	0.299005	0.0531565	0.000558144	0.00132891	0.000116944	0.000292361	0.00046512	0.00152825	0.132891		Fruits
0.14745	0.0296865	0	0	0	0	0.00313576	0.00122875	0.000865038	0.000609459	0	0	0.000285069	0.0530819	0.0235919	0.222157	0.329304	0.00688098	4.52179e-05	0.004394	0.000294899	0.00270324	0.00874868	0.00393199	0.0982998		Fruits
0.140274	0.00130478	0.00243716	0.00243716	0	0.00352644	0.0131262	0.0116373	0.000560312	0.000144976	0	0	9.40384e-05	0.00783653	0.0125385	0.0442764	0.13949	0.00548557	0.00058774	0.000952139	0.000172404	0.000431009	0.00391827	0.000470192	0.0391827	Noix de coco	Fruits
0.828963	0.00801129	0.0103469	0.00803549	0.0022267	0.0169423	0.0802339	0.0698265	0.00399354	0.00088342	0	0	0.000532472	0.0321904	0.108915	0.238402	0.782976	0.022267	0.00332795	0.00418717	0.00081081	0.00152481	0.00822912	0.000363049	0.121016	Noix de coco desséchées	Fruits
0.226098	0.0114952	0.0017928	0.000532891	0.000559535	0.00228382	0.0186892	0.00329631	0.00616631	0.00799336	0	0.00342573	0.000829787	0.00266445	0.225337	0.468183	0.307935	0.0175093	0.00172809	0.00335721	0.000510053	0.00297277	0.00380636	0.000951591	0.0380636	Citrouilles, courges et potirons	Fruits
0.0547467	0	0	0	0	0	0.00608296	0.00108885	0.00396609	0.000638711	0	0.00152074	0.00275558	0	0	0	0	0	0	0	0	0	0.000456222	0.00032848	0.00608296	Avocats	Fruits
0.683878	0	0	0	0	0	0.0759865	0.00866246	0.0148174	0.0487073	0	0.00189966	0.0119299	0.00189966	1.89966e-05	0.00011398	0.000835851	0.000227959	3.79932e-06	1.89966e-05	1.51973e-05	1.89966e-05	0.00759865	0.00759865	0.0759865	Raisin, moût	Fruits
0.0218102	0.000303321	0.0048098	0.00358207	0.000216658	0.000361096	0.000216658	7.22192e-06	7.22192e-06	7.22192e-06	0	0.00361096	5.77754e-05	0.0294654	0.0119884	0.0114106	0.288877	0.0202214	0.000216658	3.61096e-05	7.22192e-06	3.61096e-05	0.0144438	0.0144438	0.144438	Noix de coco	Fruits
0.212212	0.00199795	0.00383787	0.00237045	0	0.000643407	0.0207696	0.018625	0.000993331	0.000225757	0	0	0.000790149	0.0338635	0.0519241	0.108363	0.248333	0.0203181	0.000869164	0.00372499	0.000248333	0.00063212	0.00338635	0.00112878	0.112878	Noix de coco	Fruits
0.019039	0.000241612	0.00126605	0.000879468	0	0	0	0	0	0	0	0.00241612	0	0.00135303	0.00309263	0.00454231	0.0425237	0.00589533	4.83224e-06	4.83224e-05	9.66448e-06	2.41612e-05	0.00966448	0.00966448	0.0966448	Citrons & Limes et produits	Fruits
0.0247429	0.000295614	0.0041386	0.00384298	0	0.000295614	0.000295614	0	0	0	0	0	0	0.0393167	0.00591228	0.00886842	0.0149581	0.0136869	2.95614e-06	7.39035e-05	1.24158e-05	2.95614e-05	0.00147807	0.0020693	0.295614		Fruits
0.112155	0.000240675	0.0269556	0.0255116	0	0	0.000168473	0	0	0	0	0	0	0.00168473	0.0110711	0.0120338	0.115524	0.0312878	1.68473e-05	0.000240675	4.81351e-05	0.000144405	0	0.00240675	0.240675		Fruits
2.24338	0.00687828	0.534389	0.5164	0	0.0021693	0.00317459	0	0	0	0	0.0529098	0	1.48147	0.126984	0.264549	1.06349	0.132275	0.00264549	0.00529098	0.00264549	0.00264549	0.0582008	0.0529098	5.29098		Fruits
0.00190234	3.72197e-05	0.000265855	0.000254039	0	0	7.68026e-05	0	0	0	0	0	0	0.00590789	0	0	0.00490355	0	0	0	0	0	0	0	0.0590789		Fruits
0.0242021	0	0.00601046	0.00520907	0	0	0	0	0	0	0	0.00160279	0	8.01395e-05	0.00155471	0.00240418	0.0483241	0.00234007	8.01395e-07	8.01395e-05	8.01395e-06	8.01395e-06	4.00697e-05	0.000560976	0.0801395		Fruits
0.134282	0.00158311	0.0272238	0.0272238	0	0.00424047	0.000848095	0.000565396	0.000254428	1.41349e-05	0.00282698	0	0.000650206	0.0339238	0.0228986	0.0537127	0.193366	0.162269	0.000282698	0.000565396	0.000141349	0.000282698	0	0.00282698	0.282698		Fruits
0.0377085	0.00266242	0.00437941	0.00163005	0.000195606	0.00252115	0.000543351	0.000141271	0.00010867	0.00021734	0	0.227121	0.000467281	0.343398	0.0412946	0.0706356	0.192346	0.0630287	0.00151051	0.00340137	0.000141271	0.00124971	0.010867	0.000543351	0.10867		Fruits
0.157942	0.00647968	0.0257162	0.0169079	0.00840334	0.0060747	0.0011137	0.000354358	4.0498e-05	0.000384731	0	0.455603	0.000911205	0.0485976	0.137693	0.250075	1.58955	0.19439	0.000860583	0.00131619	0.000263237	0.000961828	0.0506225	0.00303735	1.01245	Concombres, cornichons	Fruits
0.0515264	0.00384106	0.00562106	0.00558983	0	0.00327895	0.000811931	0.000190492	4.05966e-05	0.000262316	0	0.374737	0.000374737	0.0281053	0.0546492	0.13959	0.818177	0.0583966	0.000562106	0.00112421	0.000162386	0.000968072	0.00181123	0.00512141	0.312281	Citrouilles, courges et potirons	Fruits
1.57893	0.094736	0.142613	0.141595	0	0.1528	0.036672	0.0101867	0.00295413	0.01528	0	17.6229	0.012224	3.9728	2.27163	6.62133	24.2443	1.96603	0.00906613	0.0325973	0.00865867	0.0224107	0.509333	0.254667	10.1867	Citrouilles, courges et potirons	Fruits
4.73151	0.210834	0.610438	0.607987	0	0.294187	0.0637405	0.0137287	0.00858046	0.0294187	0	110.075	0.161803	0.789402	2.47607	6.52115	62.7599	1.99557	0.0161803	0.0294187	0.00710952	0.0213286	1.22578	0.0490312	24.5156	Tomates fraiches, pelées et purée	Fruits
2.7178	0.15891	0.280691	0.279206	0.000371285	0.188613	0.0415839	0.00668312	0.00564353	0.0193068	0	36.3859	0.0995043	16.6335	1.36633	2.67325	28.2176	3.13364	0.0108415	0.114356	0.00891083	0.0163365	0.163365	0.0297028	14.8514	Tomates fraiches, pelées et purée	Fruits
2.9697	0.131721	0.511915	0.398156	0.00658604	0.125733	0.0158664	0.0027841	0.00185607	0.00598731	0	23.4702	0.170638	3.23315	1.89498	3.08346	30.2359	1.36511	0.00149683	0.0359238	0.00149683	0.00149683	0.0119746	0.131721	2.99365	Tomates fraiches, pelées et purée	Fruits
0.602278	0.0191312	0.106284	0.0732181	0.0141712	0.0472375	0.00165331	0.000873893	0.000212569	9.4475e-05	0	142.185	0.0056685	0.0590468	0.162969	0.495994	5.43231	0.307044	0.00094475	0.00425137	0.00094475	0.00236187	0.236187	0.236187	2.36187	Citrouilles, courges et potirons	Fruits
0.00219444	0.000106183	0.000353942	0.000353942	0	9.73341e-05	1.76971e-05	2.47759e-06	2.65457e-06	7.16733e-06	0	0.030616	3.36245e-05	0.00115031	0.000884855	0.00247759	0.018051	0.00115031	8.84855e-06	4.51276e-05	7.9637e-06	6.19399e-06	0.000206171	0.000128304	0.00884855	Tomates fraiches, pelées et purée	Fruits
0.0266181	0.000633764	0.00530057	0.00216632	0.00109468	0.0011523	0.00011523	1.95891e-05	4.03304e-06	4.60919e-05	0	0.344537	0.000184368	0.0149799	0.00720186	0.021087	0.27079	0.021087	0.000195891	0.000495488	7.25948e-05	0.000241983	0.00268485	0.000576149	0.11523	Citrouilles, courges et potirons	Fruits
0.0846885	0.00235	0.0152528	0.00775942	0.00266037	0.00399056	0.000665093	0.000177358	0.000310377	0.000155188	0	11.7721	0.0033698	0.00554244	0.0188443	0.0598584	0.731602	0.0399056	0.000133019	0.000421226	0.000177358	0.000532074	0.0221698	0.0221698	0.221698	Citrouilles, courges et potirons	Fruits
0.0153668	0.00113446	0.00165013	0.00165013	0	0.00134073	0.000175326	3.81592e-05	1.34073e-05	7.94124e-05	0	0.845691	0.00012376	0.00464099	0.0170169	0.0314556	0.321775	0.0293929	0.000175326	0.000618798	6.29111e-05	0.000268146	0.000247519	0.0001547	0.103133	Citrouilles, courges et potirons	Fruits
0.904546	0.0415883	0.125805	0.110902	0.00623825	0.0623825	0.00866423	0.000173285	0.000173285	0.000173285	0	68.6207	0.045054	0.939203	0.381226	0.693139	9.0108	0.693139	0.00277255	0.0135162	0.00277255	0.00311912	0.346569	0.346569	3.46569	Tomates fraiches, pelées et purée	Fruits
1.93518	0.0575213	0.309793	0.149555	0.00739559	0.0977862	0.0164347	0.00349236	0.00234194	0.00944992	0	8.58711	0.0944992	9.8197	1.2326	1.72153	32.7871	0.817624	0.00657386	0.024652	0.00616299	0.00821733	0.0164347	0.0903906	4.10866	Tomates fraiches, pelées et purée	Fruits
0.868257	0.0337512	0.144795	0.123669	0.00463757	0.0309172	0.00644107	0.000128821	0.000128821	0.000128821	0	35.0394	0.0103057	0.0644107	0.283407	0.798693	8.50222	0.170044	0.00412229	0.00953279	0.00128821	0.00463757	0.257643	0.257643	2.57643	Tomates fraiches, pelées et purée	Fruits
0.253933	0.0132568	0.0404239	0.0351025	0	0.011483	0.0027914	0.000429446	0.000494796	0.00112963	0	0.489195	9.33578e-06	0.230594	0.181114	0.332354	3.20217	0.102694	0.00172712	0.00848622	0.00132568	0.00185782	0.00513468	0	0.0933578	Tomates fraiches, pelées et purée	Fruits
0.401091	0.0152796	0.0608457	0.0491131	0.00491131	0.0218281	0.00682127	0.000136425	0.000136425	0.000136425	0	0.663027	0.0010914	0.0682127	0.242837	0.682127	3.81991	0.436561	0.00300136	0.00381991	0.000545702	0.00354706	0.272851	0.272851	2.72851	Concombres, cornichons	Fruits
1.0186	0.0569218	0.16777	0.149195	0	0.0419424	0.00659095	0.000898766	0.000958684	0.00263638	0	17.5559	0.0335539	0.659095	0.53926	1.6777	13.0621	0.659095	0.00659095	0.0407441	0.00449383	0.00838848	0.0107852	0.0898766	5.99177	Tomates fraiches, pelées et purée	Fruits
0.180866	0.00412994	0.0129605	0.00628679	0	0.00544533	0.0113162	0.0012767	0.00568713	0.00342388	0	0.0106392	9.67198e-06	0.986542	0.0783431	0.134441	1.5185	0.0454583	0.000454583	0.00259209	0.000454583	0.000754415	0.00531959	0	0.0967198	Tomates fraiches, pelées et purée	Fruits
0.0797654	0.00392519	0.00911204	0.00322426	0.000252333	0.00210278	0.00266352	0.00182241	0.000133176	0.000700926	0	0.292987	0.000602796	0.308407	0.0171026	0.0462611	0.305604	0.0409341	0.000210278	0.000630833	0.000110746	0.000308407	0.0140185	0.0140185	0.140185	Citrouilles, courges et potirons	Fruits
0.154037	0.000973514	0.0356134	0.0172521	0.016636	0.00283428	0.000221813	8.50284e-05	1.84844e-05	4.06658e-05	0	0.454717	0.000160199	0.00616148	0.0394335	0.0345043	0.573018	0.00246459	0.000184844	0.000714732	8.13315e-05	0.000160199	0.00616148	0.00369689	0.12323		Fruits
nrj_kcal	proteines_g	glucides_g	sucres_g	amidon_g	fibres_g	lipides_g	ags_g	agmi_g	agpi_g	retinol_mcg	beta_carotene_mcg	vitamine_e_mg	sodium_mg	magnesium_mg	phosphore_mg	potassium_mg	calcium_mg	manganese_mg	fer_mg	cuivre_mg	zinc_mg	selenium_mcg	iode_mcg	France_moy
149.679	2.22495	28.0976	24.7134	0.787107	4.4578	1.63564	0.37006	0.550734	0.323878	1.77846	829.226	1.33743	67.1526	35.1367	65.7979	603.91	41.3576	0.279108	0.778786	0.157708	0.301231	16.5102	12.9983	295.048
1829.85	77.2374	203.872	81.6271	101.912	17.4549	73.5689	31.4976	27.4542	8.48091	468.114	2950.69	10.0805	2231.03	260.184	1133.39	2966.4	719.748	2.88921	8.90985	1.18413	9.25299	122.133	159.071	1586.38
8.17985	2.88067	13.782	30.2759	0.772342	25.5389	2.22327	1.17488	2.00601	3.81891	0.379921	28.1028	13.2674	3.00993	13.5045	5.80539	20.3583	5.74613	9.66036	8.74073	13.3184	3.25549	13.5182	8.1714	18.5988

## Sheet: Legums (Peanut)
nrj_kcal	proteines_g	glucides_g	sucres_g	amidon_g	fibres_g	lipides_g	ags_g	agmi_g	agpi_g	retinol_mcg	beta_carotene_mcg	vitamine_e_mg	sodium_mg	magnesium_mg	phosphore_mg	potassium_mg	calcium_mg	manganese_mg	fer_mg	cuivre_mg	zinc_mg	selenium_mcg	iode_mcg	France_moy	produit_fao_v2	Classification
2.39574	0.0887743	0.0581491	0.0163593	0.0343855	0.0311679	0.19383	0.0334939	0.0957522	0.0480699	0	0	0.00969152	2.05848	0.655147	0.945892	2.05848	0.183751	0.00461316	0.00465193	0.00263609	0.0113197	0.0186077	0.0220967	0.387661	Arachides	Legums (Peanuts)
0.964214	0.0362161	0.017489	0.00393115	0.0134959	0.0134185	0.0803254	0.0122732	0.0405496	0.015121	0	0	0.00763014	0.0123816	0.27549	0.561813	0.981239	0.0897663	0.00277037	0.00244536	0.000665509	0.00428712	0.015477	0.00386924	0.15477	Arachides	Legums (Peanuts)
2.81598	0.104346	0.0683491	0.0192289	0.0404171	0.0366351	0.22783	0.0393691	0.112548	0.0565019	0	0	0.0113915	2.41956	0.770066	1.11181	2.41956	0.215983	0.00542236	0.00546793	0.00309849	0.0133053	0.0218717	0.0259727	0.455661	Arachides	Legums (Peanuts)
nrj_kcal	proteines_g	glucides_g	sucres_g	amidon_g	fibres_g	lipides_g	ags_g	agmi_g	agpi_g	retinol_mcg	beta_carotene_mcg	vitamine_e_mg	sodium_mg	magnesium_mg	phosphore_mg	potassium_mg	calcium_mg	manganese_mg	fer_mg	cuivre_mg	zinc_mg	selenium_mcg	iode_mcg	France_moy
6.17594	0.229337	0.143987	0.0395193	0.0882985	0.0812215	0.501986	0.0851362	0.24885	0.119693	0	0	0.0287132	4.49042	1.7007	2.61952	5.45927	0.489501	0.0128059	0.0125652	0.00640009	0.0289121	0.0559564	0.0519386	0.998091
1829.85	77.2374	203.872	81.6271	101.912	17.4549	73.5689	31.4976	27.4542	8.48091	468.114	2950.69	10.0805	2231.03	260.184	1133.39	2966.4	719.748	2.88921	8.90985	1.18413	9.25299	122.133	159.071	1586.38
0.33751	0.296924	0.0706262	0.0484144	0.0866423	0.465322	0.682335	0.270294	0.906419	1.41132	0	0	0.284838	0.201271	0.653654	0.231122	0.184037	0.06801	0.443232	0.141026	0.540489	0.312462	0.0458161	0.0326512	0.0629161

## Sheet: Legums
nrj_kcal	proteines_g	glucides_g	sucres_g	amidon_g	fibres_g	lipides_g	ags_g	agmi_g	agpi_g	retinol_mcg	beta_carotene_mcg	vitamine_e_mg	sodium_mg	magnesium_mg	phosphore_mg	potassium_mg	calcium_mg	manganese_mg	fer_mg	cuivre_mg	zinc_mg	selenium_mcg	iode_mcg	France_moy	produit_fao_v2	Classification
0.0135166	6.41541e-05	0.00318558	0	0.00318558	0.000176977	2.21221e-05	4.2032e-06	4.42442e-06	5.53053e-06	0	0.00553053	1.10611e-05	0.000553053	0.000641541	0.00221221	0.000265465	0.00314134	0.000110611	0.000110611	2.43343e-05	0.000110611	0.000553053	0.00110611	0.0221221	Soja	Legums (Soy)
2.39574	0.0887743	0.0581491	0.0163593	0.0343855	0.0311679	0.19383	0.0334939	0.0957522	0.0480699	0	0	0.00969152	2.05848	0.655147	0.945892	2.05848	0.183751	0.00461316	0.00465193	0.00263609	0.0113197	0.0186077	0.0220967	0.387661	Arachides	Legums (Peanuts)
0.964214	0.0362161	0.017489	0.00393115	0.0134959	0.0134185	0.0803254	0.0122732	0.0405496	0.015121	0	0	0.00763014	0.0123816	0.27549	0.561813	0.981239	0.0897663	0.00277037	0.00244536	0.000665509	0.00428712	0.015477	0.00386924	0.15477	Arachides	Legums (Peanuts)
4.88406	0.146439	0.0819557	0.00249611	0.00332815	0.123974	0.413523	0.0589915	0.156423	0.181384	0	0.0416019	0.00208009	0.0192201	2.6958	5.03383	3.89394	8.0042	0.0103173	0.121477	0.0131462	0.0477589	0.22049	0.0208009	0.832037	Sésame	Legums
0.0855207	0.00285516	0.00135385	0.000351198	0.000509371	0.000857888	0.00743949	0.0008351	0.00146109	0.004772	0	0.00402135	0.0056701	0.000737247	0.0487924	0.0639394	0.077478	0.0115949	0.000261388	0.00065682	0.000201067	0.000509371	0.00112732	0.000670225	0.0134045	Graines de tournesol	Legums
0.0475389	0.00195578	0.000639016	0.000150072	0	0.0026432	0.00354364	0.000306922	0.000630303	0.00241083	0	0	3.00144e-05	0.00198482	0.0360173	0.0576083	0.062062	0.0220751	0.000240115	0.000987571	0.000118121	0.000585765	0.00271098	4.84103e-05	0.00968207	Graines de lin	Legums
0.202888	0.00678436	0.0014469	0.000154336	0.000591622	0.00382625	0.018038	0.00260442	0.00694512	0.00768465	0	0.0128613	0.000540176	0.00932447	0.111894	0.226038	0.134723	0.0200637	0.00062699	0.00204495	0.000450147	0.0023279	0.00784542	6.43067e-05	0.0321534		Legums
2.81598	0.104346	0.0683491	0.0192289	0.0404171	0.0366351	0.22783	0.0393691	0.112548	0.0565019	0	0	0.0113915	2.41956	0.770066	1.11181	2.41956	0.215983	0.00542236	0.00546793	0.00309849	0.0133053	0.0218717	0.0259727	0.455661	Arachides	Legums (Peanuts)
0.0243187	0.000907825	0.000424752	0.000233834	0.000101236	0.00189268	0.00168911	0.000183216	0.000127096	0.00130397	0	0.000465467	2.75099e-05	0.000880316	0.0184316	0.047317	0.022393	0.0347174	0.000149654	0.000424752	5.06181e-05	0.00025199	0.000550197	0.000137549	0.00550197		Legums
0.0957788	0.00272993	0.00212842	7.55742e-05	0.000283789	0.00107963	0.00823605	0.00115366	0.00311551	0.00360906	0	0.00616933	3.85583e-05	0.0115675	0.0146522	0.117371	0.0673999	0.0438022	0.00022518	0.00103182	0.000248315	0.000712557	0.00154233	0.000385583	0.0154233	Sésame	Legums
0.145347	0.0115097	0.0174121	0.0131329	0.00295121	0.0120262	0.000885363	0.000427925	5.90242e-05	0.000147561	0	0.0147561	0.000479572	1.0403	0.0555565	0.191829	0.232408	0.0988655	0.000287743	0.00191829	0.000346767	0.000811583	0.0368901	0.018814	0.737803		Legums
2.28925	0.143078	0.277163	0.204397	0.0147166	0.261629	0.0122638	0.000408795	0.000408795	0.000408795	0	33.2759	0.00817589	0.204397	2.12573	3.10684	21.2573	4.16971	0.0155342	0.0441498	0.00572313	0.017987	0.817589	0.817589	8.17589		Legums
1.37325	0.0862703	0.180291	0.0604903	0.0680727	0.0968856	0.0134797	0.00252745	0.00111208	0.00690837	0	8.66073	0.00353843	4.33037	0.27465	1.23171	1.20475	0.347103	0.00286444	0.0217361	0.00133112	0.00707686	0.0283074	0.0151647	1.68497	Pois frais	Legums
1.38698	0.110198	0.171515	0.0276359	0.0863622	0.0829077	0.0103635	0.00259087	0.00207269	0.00466356	0	5.45809	0.000690898	0.155452	0.500901	1.72724	3.28176	0.656353	0.00500901	0.0207269	0.00241814	0.0124362	0.172724	0.172724	1.72724	Pois frais	Legums
0.807214	0.046476	0.0723348	0.0269071	0.0349443	0.117413	0.0108327	0.00314499	0.000489221	0.00663942	0	4.26321	0.00489221	9.12047	0.454276	0.884092	3.28477	1.49212	0.00328477	0.0283049	0.00454276	0.0080372	0.0314499	0.0559109	3.49443		Legums
0.0497356	0.00254947	0.00727227	0.00179717	0.00307191	0.00351075	0.000480639	4.59741e-05	8.35893e-06	0.000106576	0	0.131653	0.000606023	0.553779	0.031346	0.0397049	0.217332	0.0522433	0.000417947	0.00188076	9.19483e-05	0.00062692	0.000898585	0.00125384	0.208973		Legums
1.30167	0.0699244	0.182879	0.0441062	0.12945	0.118334	0.00681315	0.00150606	0.000251011	0.00301213	0	11.9768	0.00143435	0.053788	0.681315	1.0399	5.70153	1.82879	0.010399	0.0243839	0.00211566	0.00860609	0.0143435	0.0143435	3.58587		Legums
0.209991	0.0164355	0.0253713	0.0148398	0.0105315	0.0175525	0.000861666	0.000156376	7.65926e-05	0.000414876	0	3.9892	9.57407e-05	0.229778	0.0702098	0.245734	0.351049	0.0765926	0.00089358	0.00485086	0.000351049	0.00213821	0.00319136	0.0319136	0.319136	Pois frais	Legums
0.194817	0.0123446	0.0266982	0.00436158	0.00766581	0.0145386	0.00105735	0.000422941	0.000370074	0.00015596	0	0.481096	0.00412368	0.922541	0.0475809	0.261695	0.565684	0.150673	0.00034364	0.00190324	0.000206184	0.0015596	0.0264338	0.0264338	0.264338	Haricots secs	Legums
0.00259571	0.000191487	0.000288507	0.000195742	6.80843e-05	0.000238295	2.55316e-05	6.80843e-06	5.95737e-06	9.36159e-06	0	0.0426378	5.02121e-05	0.000425527	0.00119147	0.00340421	0.00851053	0.00297869	1.5319e-05	3.91485e-05	6.80843e-06	2.38295e-05	0.000851053	0.000851053	0.00851053		Legums
0.0779813	0.0058195	0.00984327	0.00801428	0.000299289	0.00515441	0.000631831	0.000121378	6.48459e-05	0.000282661	0	1.26366	0.000781476	0.00831357	0.046556	0.0964374	0.360809	0.0981001	0.00046556	0.00399051	0.000149644	0.00081473	0.0166271	0.0166271	0.166271		Legums
0.0306759	0.000932899	0.00230481	0.000823146	9.87775e-05	0.00181092	0.00159142	0.00104265	8.78022e-05	0.000460962	0	0.114692	0.000235968	0.00932899	0.00669492	0.0181092	0.119631	0.0160239	8.23146e-05	0.000246944	4.33523e-05	0.000120728	0.00548764	0.00548764	0.0548764		Legums
0.0704045	0.0042199	0.00977355	0.00284242	0.000393566	0.00649383	0.000262377	0	8.96455e-06	0.000104951	0	0.653756	0.000349836	0.00437295	0.026675	0.0721537	0.564111	0.131189	0.000371701	0.00174918	0.000137748	0.00045916	0.00509449	0.00317039	0.218648		Legums
0.296029	0.0165997	0.0276662	0.0103748	0.00062249	0.0165997	0.00968318	0.00587908	0.000587908	0.0032162	0	0.72278	0.00148706	0.0587908	0.042191	0.114123	0.753905	0.100982	0.000518742	0.00155623	0.000273204	0.000760822	0.0345828	0.0345828	0.345828	Pois frais	Legums
0.119755	0.0116433	0.0135068	0.000577831	0.0109788	0.00447819	0.00115566	0.000231132	0.000115566	0.000707843	0	0.297583	0.000404482	0.0144458	0.0534494	0.231132	0.288915	0.0534494	0.000447819	0.00216687	0.000447819	0.00144458	0.0144458	0.0144458	0.144458	Fèves et féveroles, vertes	Legums
1.93951	0.11689	0.207804	0.00519511	0.197414	0.238975	0.0190487	0.00432926	0.00259756	0.0105634	0	0.0948974	0.000692681	0.161048	0.571462	1.90487	4.50243	2.07804	0.0138536	0.029439	0.00329024	0.0116024	0.17317	0.17317	1.7317	Haricots secs	Legums
0.323929	0.0268917	0.0343476	0.00139625	0.0321136	0.0323929	0.00167549	0.000530573	0.000446798	0.000670198	0	0.00698123	0.0001117	0.0234569	0.108907	0.418874	0.837747	0.153587	0.0012287	0.00642273	0.000753972	0.00262494	0.0279249	0.0279249	0.279249	Haricots secs	Legums
3.49364	0.299065	0.423205	0.00733555	0.414741	0.231352	0.0141068	0.00253923	0.00366778	0.00789982	0	0.352671	0.0031035	0.0564273	0.705341	3.1035	5.3606	0.592487	0.0110033	0.06207	0.00818196	0.0366778	0.141068	0.084641	2.82137	Lentilles secs	Legums
0.430822	0.0287215	0.0544372	0.0128579	0.0380727	0.0265507	0.00497617	0.000534353	0.0011021	0.00220421	0	0.0333971	0.000634545	0.0150287	0.0697999	0.447521	1.09208	0.0824908	0.000935118	0.00697999	0.000634545	0.00217081	0.00367368	0.00667942	0.333971		Legums
1.23841	0.0813162	0.162632	0.00266611	0.159966	0.0839824	0.0105311	0.00146636	0.000213289	0.00186627	0	0.333263	0.0049323	3.90585	0.353259	1.14643	3.74588	0.841157	0.000666527	0.0173297	0.000666527	0.000666527	0.0146636	0.0666527	1.33305	Haricots secs	Legums
0.892579	0.0654072	0.122899	0.00437436	0.106235	0.0416606	0.0066657	0.00114567	0.00156227	0.00270794	0	0.260379	0.00197888	2.39549	0.164559	0.861333	1.8539	0.218718	0.00416606	0.0173933	0.00124982	0.00572833	0.0291624	0.0312455	1.04152	Lentilles secs	Legums
0.495222	0.0373548	0.0619738	0.00295655	0.0579938	0.0397997	0.00227427	0.000625423	0.000147827	0.000739137	0	0	0.00449168	1.53513	0.289969	0.517396	2.58129	0.415054	0.00295655	0.0170001	0.0013077	0.00636795	0.0568567	0.017057	0.568567	Haricots secs	Legums
0.388931	0.02344	0.0416712	0.00104178	0.0395876	0.0479218	0.00381986	0.000868149	0.00052089	0.00211828	0	0.0190298	0.000138904	0.0322952	0.114596	0.381986	0.902875	0.416712	0.00277808	0.00590342	0.000659794	0.00232664	0.034726	0.034726	0.34726	Haricots secs	Legums
0.120465	0.00926915	0.0145005	0.00111542	0.0127158	0.00780795	0.00108196	0.000457323	5.80019e-05	0.000390397	0	0	0.00021193	0.300048	0.0323472	0.13162	0.278855	0.0646944	0.00042386	0.00167313	0.000312318	0.000825412	0.0111542	0.00557711	0.111542	Haricots secs	Legums
0.0756894	0.00599472	0.00946117	0.00159806	0.00769614	0.00508836	0.000437281	3.02121e-05	2.30566e-05	0.00028622	0	0.0151061	0.000119258	0.00556539	0.0500885	0.124029	0.183658	0.042138	0.000325973	0.00139135	0.000111308	0.000659897	0.00795056	0.00397528	0.0795056		Legums
0.985789	0.0544608	0.121204	0.00404012	0.0921147	0.0440373	0.021655	0.00242407	0.00379771	0.00743382	0	0.0929227	0.00234327	1.74533	0.222207	0.66662	1.09083	0.332906	0.00541376	0.00929227	0.00169685	0.00751462	0.18827	0.0404012	0.808024	Pois chiches, secs	Legums
0.32136	0.0257953	0.0165003	0.00540404	0.0104478	0.00720539	0.0154195	0.00219044	0.00358828	0.00871852	0	0.0518788	0.00828619	0.00540404	0.24138	0.379724	1.6068	0.128256	0.00165003	0.0037396	0.00162842	0.0032136	0.00792592	0.000360269	0.0720539	Soja	Legums (Soy)
0.284314	0.0225181	0.0355392	0.00600285	0.0289092	0.0191135	0.00164257	0.000113487	8.66082e-05	0.00107514	0	0.0567433	0.000447974	0.0209054	0.188149	0.465893	0.689879	0.158284	0.00122446	0.00522636	0.000418109	0.00247879	0.0298649	0.0149325	0.298649	Soja	Legums (Soy)
0.161692	0.0151515	0.00324514	0.000644506	0.000203528	0.000282678	0.00961105	0.00152646	0.00215966	0.00543873	0	0.00282678	0.000802806	0.0113071	0.113071	0.23745	0.1583	0.113071	0.00105156	0.00271371	0.000271371	0.00146993	0.0113071	0.0113071	0.113071	Soja	Legums (Soy)
nrj_kcal	proteines_g	glucides_g	sucres_g	amidon_g	fibres_g	lipides_g	ags_g	agmi_g	agpi_g	retinol_mcg	beta_carotene_mcg	vitamine_e_mg	sodium_mg	magnesium_mg	phosphore_mg	potassium_mg	calcium_mg	manganese_mg	fer_mg	cuivre_mg	zinc_mg	selenium_mcg	iode_mcg	France_moy
31.0376	1.74154	2.56886	0.520106	1.66474	1.80141	1.13781	0.186509	0.443247	0.400214	0	72.7373	0.0927521	31.4545	12.2704	28.2192	72.7952	23.5419	0.113351	0.485478	0.0600072	0.2284	2.23741	1.82311	33.0052
1829.85	77.2374	203.872	81.6271	101.912	17.4549	73.5689	31.4976	27.4542	8.48091	468.114	2950.69	10.0805	2231.03	260.184	1133.39	2966.4	719.748	2.88921	8.90985	1.18413	9.25299	122.133	159.071	1586.38
1.69618	2.25479	1.26004	0.637173	1.63351	10.3204	1.54659	0.592136	1.6145	4.719	0	2.46509	0.920111	1.40986	4.71604	2.4898	2.45399	3.27085	3.92324	5.44878	5.06761	2.46839	1.83195	1.1461	2.08053

[truncated: 12 more sheets: Nuts, Meat, Meat (Beaf & Lamb), Meat (Pork),  Meat (Poultry), Dairy product, Eggs, Fish, Sugar products, Otherproducts, FG contribution in Consumption, Partial FG SS]
