# Supplementary material
Source: Research Square preprint supplement (doi:10.21203/rs.3.rs-10301703/v1)
Supplement: Supplementary file 3 [file 4b25fc58ed643ef9ad7ca876.xlsx]

## Sheet: Production- Consumption
Region ID	Region name		nrj_kcal	proteines_g	glucides (Carb)_g	sucres_g	amidon_g	fibres_g	FAT (lipide)_g	ags_g	agmi_g	agpi_g	retinol_mcg	beta_carotene_mcg	Vit A (RAU)	vitamine_e_mg	sodium_mg	magnesium_mg	phosphore_mg	potassium_mg	calcium_mg	manganese_mg	Iron_mg	cuivre_mg	zinc_mg	selenium_mcg	iode_mcg
Region 1	Île-de-France	RDA of region	2435	62.47	331.8	28	250	25	79	26	39	13	NO VALUE FOR RDA		683.1	14.35	1920	220.58	722.88	3271.82	1072.9	1.985	11.46	0.86	9.136	52.66	112.79
		Real consumption of region	1945.62	80.0036	217.239	90.0372	104.922	17.7851	71.3676	29.9173	26.7991	8.49037	394.631	3395.08	677.554	10.6815	2221.57	290.832	1176.3	3111.11	873.14	3.45468	9.58573	1.31832	9.57872	153.32	169.498
		Production	589.909	11.9633	119.212	50.118	61.1569	7.35799	6.27504	1.74632	2.11226	1.58902	11.6958	213.286	29.4697	2.42038	261.403	84.0896	219.621	464.442	95.5529	1.40275	2.6694	0.364657	1.67055	22.0076	20.1655
Region 2	Normandie	RDA of region	2386	62.52	331.8	28	250	25	78.6	26.2	39.3	13.09	NO VALUE FOR RDA		664.4	13.75	1900.8	211.97	731.72	3149.08	1047.6	1.9195	11.36	0.825	8.789	50.49	116.66
		Real consumption of region	2170.8	87.9514	232.982	99.4965	110.909	17.3528	84.6926	37.8638	30.7238	9.19371	637.541	3103.91	896.201	10.4155	2534.61	300.539	1289.15	3295.25	931.9	2.99287	10.3545	1.33803	10.6181	150.752	174.871
		Production	7118.55	268.182	1015.93	423.459	506.167	55.2368	208.047	105.343	68.5365	21.4933	1620.85	6864.32	2192.88	23.6629	4858.44	1068.12	5616.46	10436.9	5149.26	8.71927	23.3945	4.09856	36.277	346.123	1000.59
Region 3	Centre-Val de Loire	RDA of region	2398	63.13	331.8	28	250	25	78.6	26.2	39.3	13.09	NO VALUE FOR RDA		671.4	13.9	1920.8	213.71	738.72	3183.08	1063.6	1.94	11.39	0.834	8.884	51.04	115.32
		Real consumption of region	1791.22	75.1328	203.655	86.6777	98.355	16.6439	66.7893	28.961	24.1129	7.98402	305.451	2852.58	543.166	9.53809	2173.54	269.531	1101.64	2795.15	805.231	2.48649	8.89633	1.14884	8.75698	131.559	147.774
		Production	7230.94	201.552	1301.13	307.211	882.554	103.321	116.838	37.7614	40.475	25.3242	410.954	5325.89	854.779	35.363	4458.35	1211.28	3739.44	8165.86	1657.64	17.0296	33.6822	5.28513	28.2269	338.563	384.736
Region 4	Pays de la Loire	RDA of region	2406	63.21	331.8	28	250	25	78.6	26.2	39.3	13.09	NO VALUE FOR RDA		670.1	13.85	1917.2	213.46	740.48	3173.22	1057.9	1.935	11.46	0.831	8.856	50.86	117.81
		Real consumption of region	1997.04	77.2541	209.197	89.5177	97.4076	18.3728	75.8125	34.0842	27.2495	8.22027	514.024	3026.64	766.244	9.22507	2318.56	292.178	1121.68	3184.81	773.982	2.98717	10.2151	1.39904	9.48983	144.796	159.686
		Production	4384.68	225.107	471.186	139.067	278.88	32.2283	172.94	87.2765	57.927	16.4007	1462.03	4627.07	1847.62	15.4755	3996.68	734.219	4377.21	7002.84	3944.49	5.78785	16.4559	2.76687	28.8958	263.702	820.061
Region 5	Bretagne	RDA of region	2425	63.75	331.8	28	250	25	78.6	26.2	39.3	13.09	NO VALUE FOR RDA		678.4	14.05	1940.8	216.11	745.72	3217.08	1073.6	1.9605	11.52	0.843	8.979	51.59	116.82
		Real consumption of region	1926.74	74.7365	216.753	88.1179	104.99	17.7513	72.1573	31.614	26.1858	8.37148	427.622	3166.95	691.535	10.0891	2291.69	304.264	1122.9	3132.88	848.589	2.97462	9.17543	1.25983	8.7887	151.282	177.148
		Production	7319.91	410.27	580.675	215.285	283.601	44.5659	368.759	174.374	134.314	36.9346	2641.1	9867.94	3463.42	23.089	9849.09	1101.97	7237.77	12885.8	6295.54	7.20078	31.188	4.03428	47.446	446.709	1381.71
Region 6	Hauts-de-France	RDA of region	2413	63.28	331.8	28	250	25	78.6	26.2	39.3	13.09	NO VALUE FOR RDA		668.8	13.8	1913.6	213.21	742.24	3163.36	1052.2	1.93	11.53	0.828	8.828	50.68	120.3
		Real consumption of region	1991.58	75.5909	225.626	96.7653	107.59	17.9198	76.2675	31.0852	29.1033	9.96878	343.659	2835.7	579.968	11.3342	2136.91	285.781	1116.13	3123.73	795.631	2.55144	9.35522	1.20569	9.1654	145.049	159.624
		Production	10138.4	185.562	1983.94	1094.17	770.452	89.9088	144.601	51.4296	53.8396	27.4234	630.124	5822.99	1115.37	32.335	4359.87	1141.69	3733.37	12536.5	2548.36	10.8034	31.9319	4.73976	25.0681	355.832	532.553
Region 7	Grand Est	RDA of region	2420	63.06	331.8	28	250	25	78.6	26.2	39.3	13.09	NO VALUE FOR RDA		672.7	13.95	1924.4	215.28	736.96	3192.94	1057.3	1.945	11.52	0.837	8.912	51.22	118.51
		Real consumption of region	1912.32	72.9983	206.759	87.2313	97.092	16.1728	76.8723	32.0644	29.0336	9.46571	532.796	2550.22	745.314	11.0505	2223.15	289.651	1092.43	2914.8	817.4	3.04339	9.10929	1.28368	8.74189	151.503	153.917
		Production	5317.65	139.174	952.247	486.574	409.754	44.9789	96.9061	41.7818	32.7637	14.2049	636.122	3114.26	895.643	17.3612	2753.12	680.768	2720.17	5626.6	2035.64	6.80648	17.3539	2.72968	19.339	205.535	405.271
Region 8	Bourgogne-Franche-Comté	RDA of region	2406	63.06	331.8	28	250	25	78.6	26.2	39.3	13.09	NO VALUE FOR RDA		672.7	13.95	1924.4	214.62	736.96	3192.94	1063.3	1.945	11.42	0.837	8.912	51.22	115.67
		Real consumption of region	1996.89	78.8548	224.466	96.881	105.048	18.1323	74.0926	33.3233	26.1037	8.20654	547.856	3441.11	834.616	9.77189	2219.47	295.728	1229.36	3151.41	946.76	2.98733	9.52749	1.48648	10.1714	148.158	170.323
		Production	3639.52	170.66	460.649	111.506	302.87	32.9346	116.959	59.4845	37.4018	11.9675	1042.07	2671.64	1264.71	13.302	2801.74	637.265	3372.83	5204.03	2835.77	6.19333	14.1052	2.56903	24.1853	200.145	558.159
Region 9	Auvergne-Rhône-Alpes	RDA of region	2413	63.13	331.8	28	250	25	78.6	26.2	39.3	13.09	NO VALUE FOR RDA		671.4	13.9	1920.8	214.37	738.72	3183.08	1057.6	1.94	11.49	0.834	8.884	51.04	118.16
		Real consumption of region	1953.02	76.1177	213.309	92.4279	99.4805	18.0939	75.839	32.4015	28.41	8.79266	563.762	3461.06	852.184	10.7954	2335.94	282.959	1150.62	3066.73	857.093	3.00835	9.56906	1.43017	9.26673	134.679	164.013
		Production	1473.61	79.0417	138.974	56.7569	62.5723	9.24046	65.4246	33.0824	20.6374	7.96828	587.725	1738.66	732.613	4.29261	1287	250.696	1617.01	2853.53	1593.75	1.7151	5.26827	0.990755	10.6442	84.1952	307.742
Region 10	Provence-Alpes-Côte d’Azur	RDA of region	2425	63.67	331.8	28	250	25	78.6	26.2	39.3	13.09	NO VALUE FOR RDA		679.7	14.1	1944.4	216.69	743.96	3226.94	1076.3	1.9655	11.5	0.846	9.007	51.77	115.75
		Real consumption of region	2000.85	75.2218	202.611	82.4453	97.9227	17.034	76.0775	30.8749	29.8029	9.07848	661.635	2952.95	907.714	11.5782	2304.57	282.555	1116.09	3054.47	794.091	2.9548	10.2697	1.38459	9.09346	130.343	153.074
		Production	429.001	12.9311	70.3174	36.647	23.7596	10.0084	8.63817	2.41599	3.23868	1.91026	56.9377	1772.69	204.662	2.48336	362.898	111.207	291.891	1286.72	149.939	1.35159	4.1312	0.536301	2.08443	24.2745	27.7366
Region 11	Occitanie	RDA of region	2406	63.06	331.8	27.8	250	25	78.6	26.2	39.3	13.09	NO VALUE FOR RDA		672.7	13.95	1924.4	214.62	736.96	3192.94	1063.3	1.945	11.42	0.837	8.912	51.22	115.67
		Real consumption of region	2085.08	84.8303	218.816	93.1415	102.11	19.1438	78.855	32.7574	30.026	9.5618	489.738	3561.9	786.563	11.6337	2466.31	306.88	1265.77	3319.43	916.297	2.97215	10.8292	1.42824	10.7312	143.32	166.66
		Production	1148.5	43.5481	174.636	32.0551	116.885	21.1672	28.8222	10.5511	9.37548	6.11437	165.127	1742.14	310.305	5.94209	900.61	242.176	809.614	1776.97	500.133	4.54683	8.36192	1.15169	6.17775	60.3891	92.8907
Region 12	Nouvelle-Aquitaine	RDA of region	2406	62.98	331.8	27.8	250	25	78.6	26.2	39.3	13.09	NO VALUE FOR RDA		674	14	1928	215.2	735.2	3202.8	1066	1.95	11.4	0.84	8.94	51.4	114.6
		Real consumption of region	1906.77	75.8473	203.173	84.7813	97.1966	16.6102	69.39	29.5295	25.5085	8.3213	390.317	2871.1	629.576	9.83541	2302.12	274.726	1115.6	2893.13	828.197	3.13041	9.45228	1.26559	9.40778	136.693	153.554
		Production	2175.55	87.0899	301.928	64.668	211.86	33.996	62.1508	22.1383	20.0255	13.1789	338.567	4752.8	734.634	11.0001	2211.84	439.483	1599.23	3614.05	889.566	4.79629	11.6695	1.82264	11.9238	114.698	182.398
NB1:The Recommended Dietary Allowances (RDAs) of nutrients were calculated or defined based on the average individual (micronutrient calculations take into account the specific needs of different population groups and their respective proportions within France (or within the 12 regions of France).
NB2: Region real consumption represents the actual consumption levels of an average individual calculated for the corresponding population (France or regions), based on real food intake data of 2014. In this study, these values are considered as the actual nutrient demand fo population ofFrance or France's specific regions

## Sheet: SSR
Region ID	Region name		nrj_kcal	proteines_g	glucides (Carb)_g	sucres_g	amidon_g	fibres_g	FAT (lipide)_g	ags_g	agmi_g	agpi_g	retinol_mcg	beta_carotene_mcg	Vitamin A (mg)	vitamine_e_mg	sodium_mg	magnesium_mg	phosphore_mg	potassium_mg	calcium_mg	manganese_mg	Iron_mg	cuivre_mg	zinc_mg	selenium_mcg	iode_mcg
Region 1	Île-de-France	Self-sufficiency ratio under the RDA of region	0.242262	0.191505	0.359288	1.78993	0.244628	0.29432	0.0794309	0.067166	0.0541604	0.122232	NO VALUE FOR RDA		0.0431411	0.168668	0.136148	0.381221	0.303814	0.141952	0.0890604	0.706674	0.232932	0.42402	0.182854	0.417918	0.178788
		Self sufficiency ratio under the Real consumption of region	0.303199	0.149535	0.548759	0.556636	0.58288	0.413716	0.0879257	0.0583714	0.078818	0.187155	0.0296374	0.0628221	0.0434942	0.226595	0.117666	0.289134	0.186705	0.149285	0.109436	0.406042	0.278476	0.276607	0.174403	0.14354	0.118972
Region 2	Normandie	Self-sufficiency ratio under the RDA of region	2.98347	4.28955	3.06188	15.1235	2.02467	2.20947	2.64691	4.02072	1.74393	1.64196	NO VALUE FOR RDA		3.30054	1.72094	2.556	5.03901	7.67569	3.31426	4.9153	4.54247	2.05937	4.96795	4.12755	6.85528	8.57701
		Self sufficiency ratio under the Real consumption of region	3.27923	3.04921	4.36055	4.25602	4.56379	3.18317	2.4565	2.78215	2.23073	2.33782	2.54234	2.2115	2.44686	2.27189	1.91683	3.55401	4.35672	3.16725	5.52555	2.91335	2.25936	3.06313	3.41651	2.29598	5.72189
Region 3	Centre-Val de Loire	Self-sufficiency ratio under the RDA of region	3.0154	3.19264	3.92142	10.9718	3.53022	4.13286	1.48649	1.44128	1.0299	1.93462	NO VALUE FOR RDA		1.27313	2.5441	2.32109	5.66786	5.06206	2.5654	1.55852	8.77815	2.95717	6.33709	3.17727	6.63329	3.33624
		Self sufficiency ratio under the Real consumption of region	4.03688	2.68261	6.38887	3.54429	8.97316	6.20776	1.74936	1.30387	1.67857	3.17186	1.3454	1.86704	1.5737	3.70755	2.05119	4.49402	3.39444	2.92144	2.05859	6.84885	3.78607	4.6004	3.22336	2.57348	2.60353
Region 4	Pays de la Loire	Self-sufficiency ratio under the RDA of region	1.8224	3.56126	1.42009	4.96668	1.11552	1.28913	2.20025	3.33116	1.47397	1.25291	NO VALUE FOR RDA		2.75723	1.11736	2.08464	3.43961	5.91131	2.20686	3.7286	2.99114	1.43594	3.32956	3.26285	5.18486	6.96088
		Self sufficiency ratio under the Real consumption of region	2.1956	2.91385	2.25236	1.55351	2.86302	1.75414	2.28115	2.56061	2.1258	1.99515	2.84429	1.52878	2.41127	1.67755	1.72377	2.51291	3.90235	2.19882	5.09636	1.93757	1.61094	1.97769	3.04492	1.8212	5.13546
Region 5	Bretagne	Self-sufficiency ratio under the RDA of region	3.01852	6.43561	1.75007	7.68874	1.1344	1.78263	4.69159	6.6555	3.41766	2.82159	NO VALUE FOR RDA		5.10528	1.64335	5.07476	5.09911	9.70574	4.00545	5.86396	3.67293	2.70729	4.78563	5.28411	8.65884	11.8277
		Self sufficiency ratio under the Real consumption of region	3.79911	5.48955	2.67897	2.44314	2.70122	2.51057	5.11049	5.51573	5.12928	4.41195	6.17624	3.11591	5.00831	2.28851	4.29775	3.62175	6.44563	4.11309	7.41884	2.42074	3.39908	3.20225	5.39853	2.95282	7.79975
Region 6	Hauts-de-France	Self-sufficiency ratio under the RDA of region	4.20156	2.9324	5.97932	39.0775	3.08181	3.59635	1.83971	1.96296	1.36997	2.09498	NO VALUE FOR RDA		1.66772	2.34312	2.27836	5.35475	5.02987	3.96303	2.42193	5.59759	2.76946	5.72435	2.83961	7.02115	4.42687
		Self sufficiency ratio under the Real consumption of region	5.09062	2.45483	8.79302	11.3075	7.16099	5.01728	1.89597	1.65447	1.84995	2.75092	1.83357	2.05346	1.92316	2.85287	2.04027	3.99496	3.34493	4.01332	3.20294	4.23422	3.41327	3.93115	2.73507	2.45318	3.33629
Region 7	Grand Est	Self-sufficiency ratio under the RDA of region	2.19737	2.20701	2.86994	17.3776	1.63901	1.79916	1.2329	1.59472	0.833683	1.08517	NO VALUE FOR RDA		1.33142	1.24453	1.43064	3.16224	3.69107	1.7622	1.92532	3.49947	1.50641	3.26126	2.16999	4.01278	3.41972
		Self sufficiency ratio under the Real consumption of region	2.78073	1.90654	4.60559	5.57797	4.22026	2.78114	1.26061	1.30306	1.12848	1.50067	1.19393	1.22117	1.2017	1.57108	1.23838	2.3503	2.49002	1.93035	2.49038	2.23648	1.90508	2.12644	2.21222	1.35663	2.63305
Region 8	Bourgogne-Franche-Comté	Self-sufficiency ratio under the RDA of region	1.51268	2.70631	1.38833	3.98235	1.21148	1.31738	1.48803	2.2704	0.951699	0.914248	NO VALUE FOR RDA		1.88004	0.953548	1.4559	2.96927	4.57668	1.62985	2.66695	3.18423	1.23514	3.06933	2.71378	3.90755	4.82544
		Self sufficiency ratio under the Real consumption of region	1.82259	2.16423	2.0522	1.15096	2.88316	1.81635	1.57856	1.78507	1.43281	1.45829	1.90208	0.776388	1.51531	1.36125	1.26235	2.15491	2.74357	1.65134	2.99524	2.0732	1.48048	1.72826	2.37776	1.35089	3.27705
Region 9	Auvergne-Rhône-Alpes	Self-sufficiency ratio under the RDA of region	0.610697	1.25205	0.418849	2.02703	0.250289	0.369618	0.832374	1.26269	0.525125	0.60873	NO VALUE FOR RDA		1.09117	0.308821	0.670034	1.16946	2.18894	0.896467	1.50695	0.884072	0.458509	1.18796	1.19813	1.64959	2.60445
		Self sufficiency ratio under the Real consumption of region	0.75453	1.03841	0.651513	0.614067	0.62899	0.510694	0.862677	1.02102	0.726412	0.906241	1.0425	0.50235	0.859689	0.397634	0.550956	0.885981	1.40534	0.930479	1.85948	0.570113	0.550552	0.692755	1.14864	0.625156	1.87632
Region 10	Provence-Alpes-Côte d’Azur	Self-sufficiency ratio under the RDA of region	0.176908	0.203095	0.211927	1.30882	0.0950384	0.400337	0.1099	0.0922135	0.0824091	0.145933	NO VALUE FOR RDA		0.301106	0.176125	0.186638	0.513208	0.392347	0.398745	0.13931	0.687656	0.359235	0.633926	0.231423	0.468891	0.239625
		Self sufficiency ratio under the Real consumption of region	0.214409	0.171906	0.347055	0.444501	0.242636	0.587557	0.113544	0.0782511	0.10867	0.210416	0.086056	0.600312	0.22547	0.214485	0.157469	0.393577	0.261531	0.421259	0.188818	0.457422	0.402271	0.387335	0.229223	0.186236	0.181197
Region 11	Occitanie	Self-sufficiency ratio under the RDA of region	0.477348	0.690582	0.526328	1.15306	0.46754	0.84669	0.366694	0.402712	0.238562	0.467102	NO VALUE FOR RDA		0.461283	0.425956	0.467995	1.1284	1.09859	0.556531	0.470359	2.3377	0.732217	1.37597	0.693195	1.17901	0.803066
		Self sufficiency ratio under the Real consumption of region	0.550817	0.513355	0.798094	0.344155	1.1447	1.1057	0.365509	0.322097	0.312246	0.639458	0.337174	0.489103	0.394507	0.510765	0.365166	0.789156	0.639619	0.535324	0.54582	1.52981	0.772167	0.806369	0.575682	0.421358	0.557366
Region 12	Nouvelle-Aquitaine	Self-sufficiency ratio under the RDA of region	0.904221	1.38282	0.90997	2.32619	0.847439	1.35984	0.790722	0.844975	0.509556	1.00679	NO VALUE FOR RDA		1.08996	0.785723	1.14722	2.04221	2.17524	1.1284	0.83449	2.45963	1.02364	2.16981	1.33376	2.23148	1.59161
		Self sufficiency ratio under the Real consumption of region	1.14096	1.14823	1.48607	0.762763	2.1797	2.0467	0.895674	0.749702	0.785054	1.58376	0.867416	1.65539	1.16687	1.11842	0.960784	1.59971	1.43352	1.24919	1.0741	1.53216	1.23457	1.44015	1.26744	0.839094	1.18784
NB1:The Recommended Dietary Allowances (RDAs) of nutrients were calculated or defined based on the average individual (micronutrient calculations take into account the specific needs of different population groups and their respective proportions within France (or within the 12 regions of France).
NB2: Region real consumption represents the actual consumption levels of an average individual calculated for the corresponding population (France or regions), based on real food intake data of 2014. In this study, these values are considered as the actual nutrient demand fo population ofFrance or France's specific regions
