# Supplementary material
Source: Research Square preprint supplement (doi:10.21203/rs.3.rs-10301703/v1)
Supplement: Supplementary file 4 [file 4d15eacfb2a33d2a85b6bb16.xlsx]

## Sheet: read me
variable	description
alim_simple_code	code CIQUAL de l'aliment
alim_simple_libelle	libellé de l'aliment
nrj_kcal	apport énergétique en kcal pour 100g de l'aliment
…
France_moy	quantité consommée pour un individu moyen en France (g/j)
France_2014	quantité consommée en France en 2014 (g/j)
France_stderr_moy	erreur standard à la moyenne de France_moy (g/j)
…
Region_1_moy	quantité consommée pour un individu moyen dans la région 1 (g/j)
…
Region_1_2014	quantité consommée dans la région 1 en 2014 (g/j)
…
code_fao	correspondance avec le code FAO de l'aliment
produit_fao_v2	libellé FAO
Code_Domaine	source FAO : FBS (food balance sheet), SCL (supply utilization accounts), FS (fishstat)
Régions
1	Ile-de-France
2	Normandie
3	Centre-Val de Loire
4	Pays de la Loire
5	Bretagne
6	Hauts-de-France
7	Grand Est
8	Bourgogne-Franche-Comté
9	Auvergne-Rhône-Alpes
10	Provence-Alpes-Côte d'Azur
11	Occitanie-Pyrénées-Méditerranée
12	Nouvelle-Aquitaine

## Sheet: France
alim_simple_code	alim_simple_libelle		nrj_kcal	eau_g	proteines_g	glucides_g	sucres_g	amidon_g	fibres_g	lipides_g	ags_g	agmi_g	agpi_g	retinol_mcg	beta_carotene_mcg	vitamine_e_mg	sodium_mg	magnesium_mg	phosphore_mg	potassium_mg	calcium_mg	manganese_mg	fer_mg	cuivre_mg	zinc_mg	selenium_mcg	iode_mcg	nrj_kcal	eau_g	proteines_g	glucides_g	sucres_g	amidon_g	fibres_g	lipides_g	ags_g	agmi_g	agpi_g	retinol_mcg	beta_carotene_mcg	vitamine_e_mg	sodium_mg	magnesium_mg	phosphore_mg	potassium_mg	calcium_mg	manganese_mg	fer_mg	cuivre_mg
1000	Pastis		274	59.7	0	2.86	0	0	0	0	0	0	0	0	0	0	0	0	5	2	0	0	0.08	0.03	0.02	0	1	16.9029	3.68285	0	0.176431	0	0	0	0	0	0	0	0	0	0	0	0	0.308446	0.123378	0	0	0.00493514	0.00185068
1001	Eau de vie		229	67.1	0	0.37	0	0	0	0	0	0	0	0	0	0	1	0	5	1	0.5	0	0.04	0.051	0.019	0	1.1	0.0117296	0.00343694	0	1.89518e-05	0	0	0	0	0	0	0	0	0	0	5.12212e-05	0	0.000256106	5.12212e-05	2.56106e-05	0	2.04885e-06	2.61228e-06
1003	Liqueur		328	35.6	0.1	39.6	35.3	0	0	0.3	0.083	0.02	0.12	0	0	0	7.25	3	6	30	1	0.022	0.08	0.03	0.09	0	1	0.827505	0.0898146	0.000252288	0.0999061	0.0890577	0	0	0.000756864	0.000209399	5.04576e-05	0.000302746	0	0	0	0.0182909	0.00756864	0.0151373	0.0756864	0.00252288	5.55034e-05	0.000201831	7.56864e-05
1004	Rhum		256	63.5	0	0	0	0	0	0	0	0	0	0	0	0	1	0	4.5	2	0	0.018	0.08	0.059	0.043	0	1	0.384862	0.0954639	0	0	0	0	0	0	0	0	0	0	0	0	0.00150337	0	0.00676516	0.00300674	0	2.70606e-05	0.000120269	8.86987e-05
1005	Whisky		252	63.9	0	0.096	0.096	0	0	0	0	0	0	0	0	0	0	0	3	1	0	0.008	0.02	0.017	0.014	0	1.25	1.15242	0.29222	0	0.000439016	0.000439016	0	0	0	0	0	0	0	0	0	0	0	0.0137193	0.00457309	0	3.65847e-05	9.14617e-05	7.77425e-05
1006	Vin doux		149	73.1	0.2	10.5	7.78	0	0	0	0	0	0	0	0	0	10.9	9.07	9	83.1	7.46	0.071	0.35	0.053	0.11	0.07	1	5.14915	2.52619	0.00691161	0.36286	0.268862	0	0	0	0	0	0	0	0	0	0.376683	0.313442	0.311023	2.87178	0.257803	0.00245362	0.0120953	0.00183158
1007	Apéritif à base de vin ou vermouth		137	75.3	0.054	11.3	11.1	0	0	0	0	0	0	0	0	0	15	7	6.25	48	7.37	0	0.44	0.1	0.035	0	1.2	3.79892	2.08802	0.00149739	0.313342	0.307796	0	0	0	0	0	0	0	0	0	0.415941	0.194106	0.173309	1.33101	0.204365	0	0.0122009	0.00277294
1008	Vodka		242	65.5	0	0	0	0	0	0	0	0	0	0	0	0	1	0	4.75	1.25	0	0.018	0.025	0.0083	0.022	0	1	0.117232	0.0317302	0	0	0	0	0	0	0	0	0	0	0	0	0.00048443	0	0.00230104	0.000605538	0	8.71975e-06	1.21108e-05	4.02077e-06
1011	Apéritif anisé sans alcool		5.99	98	0	1	0.03	0	1	0	0	0	0	0	0	0	15	0.33	0	3.9	1.83	0.004	0	0.019	0.03	0	1.2	0.00397931	0.0651039	0	0.000664325	1.99298e-05	0	0.000664325	0	0	0	0	0	0	0	0.00996488	0.000219227	0	0.00259087	0.00121572	2.6573e-06	0	1.26222e-05
1012	Cocktail à base de rhum		180	65	0	22.5	22.3	0	0.3	2.19	1.64	0.082	0.033	0	1	0.02	6	8	7	71	8	0.53	0.21	0.079	0.13	0.76	0.98	2.7762	1.00252	0	0.347025	0.34394	0	0.004627	0.0337771	0.0252943	0.00126471	0.00050897	0	0.0154233	0.000308467	0.09254	0.123387	0.107963	1.09506	0.123387	0.00817437	0.0032389	0.00121844
1013	Cocktail à base de whisky		166	69.2	0	15.9	15.8	0	0	0.02	0.003	0.001	0.006	0	0	0	47	3	4	4	46	0.007	0.08	0.034	0.04	0.76	0.98	6.27858	2.61734	0	0.601382	0.5976	0	0	0.000756455	0.000113468	3.78228e-05	0.000226937	0	0	0	1.77767	0.113468	0.151291	0.151291	1.73985	0.000264759	0.00302582	0.00128597
1015	Marsala		211	57.7	0.1	27.9	27.9	0	0	0	0	0	0	0	0	0	4	0	12	97	4	0.013	0.4	0.03	0	0	1	0.0587776	0.0160733	2.78567e-05	0.00777202	0.00777202	0	0	0	0	0	0	0	0	0	0.00111427	0	0.0033428	0.027021	0.00111427	3.62137e-06	0.000111427	8.35701e-06
1017	Sangria		85.9	83	0	10.3	9.5	0.21	0	0.05	0	0.013	0.027	0	54	0.14	3	10.7	12.6	123	9.35	0.19	0.37	0.056	0.07	0.25	0.91	0.256121	5.12021	0	0.0307106	0.0283253	0.000626139	0	0.000149081	0	3.8761e-05	8.05036e-05	0	0.161007	0.000417426	0.00894484	0.0319033	0.0375683	0.366739	0.0278781	0.000566507	0.0011032	0.00016697
1018	Kir (au vin blanc)		91	83.5	0.18	7.36	5.55	0	0	0	0	0	0	0	8.7	0.14	1.56	5.09	18	108	6.88	0.08	0.67	0.0027	0.082	1.1	0.96	0.535557	5.15105	0.00105934	0.0433154	0.0326631	0	0	0	0	0	0	0	0.0512016	0.000823934	0.00918098	0.0299559	0.105934	0.635606	0.0404905	0.000470819	0.00394311	1.58902e-05
1019	Kir royal (au champagne)		96.6	82.5	0.25	7.97	5.66	0	0	0	0	0	0	0	8.7	0.14	1.56	5.09	11	91.4	6.88	0.08	0.56	0.0027	0.082	1.1	0.78	0.222486	5.08936	0.000575793	0.0183563	0.013036	0	0	0	0	0	0	0	0.0200376	0.000322444	0.00359295	0.0117231	0.0253349	0.21051	0.0158458	0.000184254	0.00128978	6.21856e-06
1021	Crème de cassis		245	47.1	0	41	40.9	0	0	0	0	0	0	0	48.1	0.52	0	8.44	18.5	128	16.6	0.11	0.62	0.097	0.12	0.57	0.87	0.0315425	2.90556	0	0.00527853	0.00526566	0	0	0	0	0	0	0	0.00619262	6.69472e-05	0	0.00108661	0.00238178	0.0164793	0.00213716	1.41619e-05	7.98217e-05	1.24882e-05
1022	Cocktail type punch, 16% alcool		162	69.4	0.6	17.8	17.8	0	0.25	0.3	0.00012	0.00012	0.00012	0	52.9	0.04	16.7	3.1	13	43	13	0.09	0.06	0.01	0.26	25	10	3.92336	4.28123	0.014531	0.431085	0.431085	0	0.00605456	0.00726548	2.90619e-06	2.90619e-06	2.90619e-06	0	1.28115	0.00096873	0.404445	0.0750766	0.314837	1.04138	0.314837	0.00217964	0.0014531	0.000242183
1023	Eau de vie de vin, type armagnac, cognac		228	68	0	1	0	0	0	0	0	0	0	0	0	0	1	0	5	2	0.25	0.013	0.08	0.16	0.016	0	1	1.80815	4.19487	0	0.00793047	0	0	0	0	0	0	0	0	0	0	0.00793047	0	0.0396523	0.0158609	0.00198262	0.000103096	0.000634438	0.00126888
1026	Saké ou Alcool de riz		133	78.4	0	5	0	0	0	0	0	0	0	0	0	0	2	6	6	25	5	0.013	0.1	0.009	0.02	0	1	0.000930534	4.83644	0	3.49825e-05	0	0	0	0	0	0	0	0	0	0	1.3993e-05	4.1979e-05	4.1979e-05	0.000174912	3.49825e-05	9.09545e-08	6.9965e-07	6.29685e-08
2000	Jus d'ananas, à base de concentré		52.3	87.1	0.41	11.9	11.9	0	0.18	0.096	0.044	0.0081	0.025	0	3	0.02	4.62	17	9.12	144	14.3	1.46	0.15	0.03	0.066	5	1	0.258131	5.37313	0.00202359	0.0587335	0.0587335	0	0.000888407	0.000473817	0.000217166	3.99783e-05	0.00012339	0	0.0148068	9.87118e-05	0.0228024	0.0839051	0.0450126	0.710725	0.070579	0.00720596	0.000740339	0.000148068
2006	Jus de carotte, pur jus		38.2	88.9	0.4	6.55	5.95	0	0.33	0.1	0.037	0.0025	0.041	0	9300	1.16	42.5	8.75	25.6	210	13.6	0.071	0.46	0.051	0.086	1.1	2	0.125248	5.48417	0.00131149	0.0214757	0.0195085	0	0.00108198	0.000327873	0.000121313	8.19683e-06	0.000134428	0	30.4922	0.00380333	0.139346	0.0286889	0.0839356	0.688534	0.0445908	0.00023279	0.00150822	0.000167215
2007	Jus de citron, maison		28.8	91.5	0.49	2.41	2.06	0	0.3	0.24	0.04	0.006	0.021	0	1	0.095	2.62	5.99	14.5	132	12.4	0.008	0.24	0.042	0.049	1.1	0.6	0.286905	5.64457	0.00488138	0.0240084	0.0205217	0	0.0029886	0.00239088	0.00039848	5.97719e-05	0.000209202	0	0.00996199	0.000946389	0.0261004	0.0596723	0.144449	1.31498	0.123529	7.96959e-05	0.00239088	0.000418404
2008	Cocktail sans alcool (à base de jus de fruits et de sirop)		53.2	86.4	0.5	12.8	11.2	0	0	0	0	0	0	0	75	1	2	8.31	10.9	132	12.8	0.035	0.1	0.043	0.034	0.36	5.43	0.173324	5.32995	0.00162898	0.041702	0.0364892	0	0	0	0	0	0	0	0.244348	0.00325797	0.00651593	0.0270737	0.0355118	0.430052	0.041702	0.000114029	0.000325797	0.000140093
2012	Jus d'orange, à base de concentré		45.6	89.7	0.63	9.59	9.59	0	0.25	0.13	0.034	0.03	0.035	0	10.6	0.15	3.44	10.9	16.9	154	7.25	0.02	0.08	0.023	0.022	5	0.4	3.59029	5.53353	0.0496027	0.755063	0.755063	0	0.0196836	0.0102355	0.00267697	0.00236203	0.0027557	0	0.834585	0.0118102	0.270846	0.858205	1.33061	12.1251	0.570824	0.00157469	0.00629875	0.00181089
2013	Jus d'orange, maison		45	88.3	0.7	9.4	8.4	0	0.2	0.2	0.024	0.036	0.04	0	33	0.04	0.56	13.2	17	200	10.5	0.022	0.079	0.025	0.027	5	1	1.74883	5.44716	0.0272041	0.365312	0.326449	0	0.0077726	0.0077726	0.000932712	0.00139907	0.00155452	0	1.28248	0.00155452	0.0217633	0.512991	0.660671	7.7726	0.408061	0.000854986	0.00307018	0.000971575
2014	Jus de pomme, à base de concentré		48.5	88.5	0.24	11.3	10.8	0	0.3	0.098	0.033	0.006	0.053	0	4.23	0.01	3.98	7.07	6	128	6.45	0.026	0.085	0.011	0.01	5	0.7	0.451531	5.4595	0.00223438	0.105202	0.100547	0	0.00279297	0.000912371	0.000307227	5.58595e-05	0.000493425	0	0.0393809	9.30991e-05	0.0370534	0.0658211	0.0558595	1.19167	0.0600489	0.000242058	0.000791342	0.000102409
2015	Jus de pamplemousse (pomélo), à base de concentré		40.9	89.9	0.52	8.41	8.41	0	0.21	0.1	0.055	0.0085	0.016	0	3	0.04	3.97	7.91	12.5	115	10.6	0.016	0.15	0.031	0.037	1.1	0.6	0.288215	5.54586	0.00366434	0.0592637	0.0592637	0	0.00147983	0.000704681	0.000387575	5.98979e-05	0.000112749	0	0.0211404	0.000281873	0.0279758	0.0557403	0.0880852	0.810383	0.0746962	0.000112749	0.00105702	0.000218451
2016	Jus de raisin, pur jus		69.2	82.4	0.25	16.3	16	0	0.14	0.057	0.031	0.003	0.022	0	5	0.4	3.81	8.35	12.5	114	8.29	0.089	0.47	0.031	0.056	5	0.5	0.365258	5.08319	0.00131957	0.0860362	0.0844527	0	0.000738961	0.000300863	0.000163627	1.58349e-05	0.000116122	0	0.0263915	0.00211132	0.0201103	0.0440737	0.0659787	0.601725	0.043757	0.000469768	0.0024808	0.000163627
2017	Jus de grenade, pur jus		55.4	86	0.15	13	12.7	0	0.1	0.29	0.077	0.059	0.05	0	0	0.38	9	7	11	214	11	0.095	0.1	0.021	0.09	3.05	1	0.0900509	5.30528	0.00024382	0.0211311	0.0206434	0	0.000162547	0.000471386	0.000125161	9.59026e-05	8.12734e-05	0	0	0.000617678	0.0146292	0.0113783	0.0178801	0.34785	0.0178801	0.000154419	0.000162547	3.41348e-05
2018	Jus de pruneau		77.5	81.2	0.37	18.7	13.5	0	0.45	0.039	0.003	0.021	0.007	0	2	0.12	10	14	25	276	12	0.15	1.18	0.068	0.21	3.05	1	0.0205957	5.00917	9.8328e-05	0.00496955	0.00358764	0	0.000119588	1.03643e-05	7.97254e-07	5.58078e-06	1.86026e-06	0	0.000531503	3.18902e-05	0.00265751	0.00372052	0.00664379	0.0733474	0.00318902	3.98627e-05	0.000313587	1.80711e-05
2019	Jus de raisin, à base de concentré		68.8	84.2	0.31	16	16	0	0.15	0.11	0.055	0.0083	0.024	0	2.5	0.67	2.83	7.8	17	62	16	0.06	0.43	0.005	0.025	10	10	0.18874	5.19423	0.000850426	0.0438929	0.0438929	0	0.000411496	0.000301764	0.000150882	2.27695e-05	6.58394e-05	0	0.00685827	0.00183802	0.00776356	0.0213978	0.0466363	0.170085	0.0438929	0.000164599	0.00117962	1.37165e-05
2023	Jus de mangue, frais		51.1	86	0.19	9.5	9.3	0.2	0	0	0	0	0	0	375	1.05	3.98	14.3	12.5	134	10.6	0.02	0.15	0.02	0.02	0.1	3	0.0838571	5.30528	0.000311798	0.0155899	0.0152617	0.000328208	0	0	0	0	0	0	0.61539	0.00172309	0.00653134	0.0234669	0.020513	0.219899	0.017395	3.28208e-05	0.000246156	3.28208e-05
2025	Jus de pamplemousse (pomélo), maison		43.6	90	0.5	9.1	9.1	0	0.1	0.1	0.014	0.013	0.024	0	4	0.22	1	12	15	162	9	0.02	0.2	0.033	0.05	3.05	0.6	0.0909296	5.55203	0.00104277	0.0189784	0.0189784	0	0.000208554	0.000208554	2.91976e-05	2.7112e-05	5.0053e-05	0	0.00834216	0.000458819	0.00208554	0.0250265	0.0312831	0.337858	0.0187699	4.17108e-05	0.000417108	6.88228e-05
2027	Jus de pamplemousse (pomelo), pur jus		42.5	89.9	0.49	8.89	8.89	0	0.15	0.083	0.044	0.0055	0.017	0	217	0.19	3.05	8.63	15	128	4.83	0.05	0.15	0.05	0.05	3.05	1	0.441507	5.54586	0.00509032	0.0923529	0.0923529	0	0.00155826	0.000862237	0.00045709	5.71362e-05	0.000176603	0	2.25428	0.0019738	0.0316846	0.0896519	0.155826	1.32972	0.050176	0.00051942	0.00155826	0.00051942
2028	Jus de citron, pur jus		29.4	92.5	0.4	6.1	2.4	0	0.4	0.29	0.038	0.011	0.085	0	2	0.15	21	8	9	102	11	0.02	0.13	0.037	0.06	3.05	1	0.129594	5.70626	0.00176318	0.0268885	0.0105791	0	0.00176318	0.0012783	0.000167502	4.84874e-05	0.000374675	0	0.00881589	0.000661192	0.0925668	0.0352635	0.0396715	0.44961	0.0484874	8.81589e-05	0.000573033	0.000163094
2030	Jus de citron vert, maison		28.8	90.8	0.42	1.69	1.69	0	0.4	0.07	0.008	0.008	0.023	0	30	0.22	2	8	14	117	14	0.018	0.09	0.027	0.08	3.05	1	0.00286439	5.60138	4.17724e-05	0.000168084	0.000168084	0	3.97832e-05	6.96206e-06	7.95664e-07	7.95664e-07	2.28754e-06	0	0.00298374	2.18808e-05	0.000198916	0.000795664	0.00139241	0.0116366	0.00139241	1.79024e-06	8.95122e-06	2.68537e-06
2031	Jus de citron vert, pur jus		23.9	92.5	0.25	1.24	1.24	0	0.45	0.23	0.026	0.022	0.064	0	10	0.12	10.5	7	10	75	12	0.008	0.23	0.03	0.06	3.05	1.2	0.00125626	5.70626	1.31408e-05	6.51786e-05	6.51786e-05	0	2.36535e-05	1.20896e-05	1.36665e-06	1.15639e-06	3.36406e-06	0	0.000525634	6.3076e-06	0.000551915	0.000367944	0.000525634	0.00394225	0.00063076	4.20507e-07	1.20896e-05	1.5769e-06
2034	Jus de clémentine ou mandarine, pur jus		46.9	88	0.66	10.6	10	0	0.15	0.14	0.043	0.03	0.035	0	30	0.09	3.79	9.3	16	123	2.8	0.05	0.3	0.05	0.05	0.5	1	0.232564	5.42865	0.00327276	0.0525625	0.0495873	0	0.000743809	0.000694222	0.000213225	0.000148762	0.000173555	0	0.148762	0.000446285	0.0187936	0.0461162	0.0793396	0.609923	0.0138844	0.000247936	0.00148762	0.000247936
2035	Jus multifruit, pur jus, standard		48.9	87.3	0.25	11.2	10.1	0.15	0.25	0.15	0.005	0.005	0.005	0	84.9	0.2	0.92	7	10	140	5.4	0.09	0.08	0.03	0.025	10	10	1.69439	5.38547	0.00866253	0.388081	0.349966	0.00519752	0.00866253	0.00519752	0.000173251	0.000173251	0.000173251	0	2.9418	0.00693002	0.0318781	0.242551	0.346501	4.85102	0.187111	0.00311851	0.00277201	0.0010395
2043	Nectar d'abricot		58.5	84.9	0.21	13.7	11	0	0.08	0.03	0.005	0.013	0.0059	0	786	0.31	1.68	5.28	9	114	11.5	0.022	0.38	0.039	0.05	1.1	0.2	0.479654	5.23742	0.00172183	0.112329	0.0901913	0	0.000655937	0.000245976	4.0996e-05	0.00010659	4.83753e-05	0	6.44458	0.00254175	0.0137747	0.0432918	0.0737929	0.93471	0.0942909	0.000180383	0.0031157	0.000319769
2053	Jus de tomate, pur jus (aliment moyen)		21.7	94.1	0.88	3.72	3.72	0	0.4	0.14	0.035	0.011	0.033	0	144	0.35	175	13.1	21.8	283	6.54	0.07	0.31	0.061	0.14	0.7	0.3	0.0473086	5.80496	0.00191851	0.00811005	0.00811005	0	0.000872048	0.000305217	7.63042e-05	2.39813e-05	7.1944e-05	0	0.313937	0.000763042	0.381521	0.0285596	0.0475266	0.616974	0.014258	0.000152608	0.000675837	0.000132987
2054	Nectar de poire		62.4	84	0.19	14.8	11.4	0	0.45	0.043	0.001	0.003	0.003	0	1	0.05	1.3	3	3	13	5	0.03	0.26	0.067	0.07	1.1	0.7	0.0844015	5.1819	0.000256992	0.0200183	0.0154195	0	0.000608665	5.81613e-05	1.35259e-06	4.05777e-06	4.05777e-06	0	0.00135259	6.76294e-05	0.00175837	0.00405777	0.00405777	0.0175837	0.00676294	4.05777e-05	0.000351673	9.06234e-05
2055	Citron, boisson à base de jus concentré, diluée		2.04	99.5	0.027	0.38	0.15	0	0.027	0.02	0.0023	0.00071	0.0052	0	0.15	0.0094	3.52	1.48	0.66	8.2	7.4	0.0022	0.037	0.018	0.017	0.75	0.16	0.0654971	6.13808	0.000866873	0.0122004	0.00481596	0	0.000866873	0.000642128	7.38447e-05	2.27955e-05	0.000166953	0	0.00481596	0.0003018	0.113015	0.0475175	0.0211902	0.263273	0.237587	7.06341e-05	0.00118794	0.000577915
2061	Nectar multifruit, standard		49.7	87.2	0.3	11.5	11	0	0.3	0.089	0.013	0	0	120	26.1	0.97	3.43	5.35	6.17	87.4	9.17	0.05	0	0.05	0	0.3	10	0.400298	5.3793	0.00241628	0.0926242	0.088597	0	0.00241628	0.000716831	0.000104706	0	0	0.966513	0.210217	0.00781265	0.0276262	0.0430904	0.0496949	0.703944	0.0738577	0.000402714	0	0.000402714
2069	Jus multifruit, à base de concentré, standard		49.5	87.8	0.52	11.2	10.8	0	0.62	0.15	0.021	0	0	0	449	0.53	8.57	8.2	12.1	148	11.1	0.2	0.1	0.05	0.05	0.5	10	2.41851	5.41632	0.0254066	0.547219	0.527676	0	0.0302925	0.00732883	0.00102604	0	0	0	21.9376	0.0258952	0.41872	0.400643	0.591192	7.23111	0.542333	0.00977177	0.00488589	0.00244294
2070	Jus d'orange, pur jus		45.4	88.2	0.61	9.61	9.61	0	0.28	0.11	0.053	0.014	0.019	0	26.2	0.2	4.81	10	16.5	165	0.41	0.021	0.068	0.022	0.045	3.05	0.7	12.0869	5.44099	0.162401	2.55848	2.55848	0	0.0745446	0.0292854	0.0141102	0.00372723	0.00505839	0	6.97525	0.0532462	1.28057	2.66231	4.39281	43.9281	0.109155	0.00559085	0.0181037	0.00585708
2073	Jus d'ananas, pur jus		52.9	86.3	0.41	12.1	12.1	0	0.22	0.074	0.031	0.01	0.03	0	7	0.02	5.2	13.6	9.8	134	8.08	1.2	0.18	0.04	0.073	1.1	1	0.472041	5.32378	0.00365854	0.107972	0.107972	0	0.00196312	0.000660322	0.000276621	8.92327e-05	0.000267698	0	0.0624629	0.000178465	0.046401	0.121356	0.087448	1.19572	0.0721	0.0107079	0.00160619	0.000356931
2074	Jus de pomme, pur jus		48.9	88.4	0.17	11.4	10.9	0	0.23	0.14	0.046	0.006	0.039	0	7	0.01	13.3	4.56	6.59	113	4.32	0.05	0.3	0.05	0.05	0.1	1	1.81924	5.45333	0.00632454	0.424116	0.405515	0	0.00855673	0.00520845	0.00171135	0.000223219	0.00145092	0	0.260422	0.000372032	0.494802	0.169647	0.245169	4.20396	0.160718	0.00186016	0.011161	0.00186016
2365	Nectar de fruit de la passion ou maracuja		68	85.5	0.3	15.2	13	0	0	0.1	0	0	0	0	100	0	3	3.8	5.1	72.8	1.7	0.03	0.14	0.02	0.02	0.1	1.1	0.0164172	5.27443	7.24288e-05	0.00366972	0.00313858	0	0	2.41429e-05	0	0	0	0	0.0241429	0	0.000724288	0.000917431	0.00123129	0.017576	0.00041043	7.24288e-06	3.38001e-05	4.82858e-06
2367	Nectar de goyave		47.8	88	0.14	11.3	9.97	0	0.14	0.16	0.005	0	0	0	166	0.27	2.02	2.6	4.5	61	7.8	0.03	0.07	0.02	0.025	10	10	0.0175936	5.42865	5.15292e-05	0.00415914	0.00366962	0	5.15292e-05	5.88905e-05	1.84033e-06	0	0	0	0.0610989	9.93778e-05	0.000743493	0.000956971	0.0016563	0.022452	0.00287091	1.1042e-05	2.57646e-05	7.36132e-06
2370	Nectar de mangue		51.3	87	0.2	12.3	11.6	0	0.15	0.083	0.058	0.0029	0.0029	0	784	0.27	4.59	3.7	3.8	39	8.1	0.03	0.08	0.02	0.025	10	10	0.015779	5.36696	6.15166e-05	0.00378327	0.00356796	0	4.61375e-05	2.55294e-05	1.78398e-05	8.91991e-07	8.91991e-07	0	0.241145	8.30474e-05	0.00141181	0.00113806	0.00116882	0.0119957	0.00249142	9.22749e-06	2.46066e-05	6.15166e-06
2371	Nectar de pêche		55	85.6	0.22	12.1	11.9	0	0.33	0.05	0.002	0.008	0.011	0	128	0.29	4.37	4	6	40	5	0.019	0.19	0.069	0.08	1.1	5.55	0.0237563	5.2806	9.50251e-05	0.00522638	0.00513999	0	0.000142538	2.15966e-05	8.63864e-07	3.45546e-06	4.75125e-06	0	0.0552873	0.00012526	0.00188754	0.00172773	0.00259159	0.0172773	0.00215966	8.20671e-06	8.20671e-05	2.98033e-05
2375	Nectar d'orange		39.8	89.7	0.29	8.79	8.79	0	0.18	0.08	0.005	0.0028	0.0028	0	5	0.27	6.51	5.96	7.7	82.8	7.69	0.022	0.14	0.023	0.041	1.1	1.1	0.286202	5.53353	0.00208539	0.0632089	0.0632089	0	0.00129438	0.00057528	3.5955e-05	2.01348e-05	2.01348e-05	0	0.035955	0.00194157	0.0468134	0.0428584	0.0553707	0.595415	0.0552988	0.000158202	0.00100674	0.000165393
2500	Smoothie		59.8	84.2	0.62	12.4	11.7	0.18	1.08	0.26	0.17	0	0	0	238	0	3.84	11.5	15.5	165	9.65	0.27	0.24	0.045	0.07	10	10	0.483184	5.19423	0.0050096	0.100192	0.094536	0.0014544	0.0087264	0.0021008	0.0013736	0	0	0	1.92304	0	0.0310272	0.09292	0.12524	1.3332	0.077972	0.0021816	0.0019392	0.0003636
4002	Pomme de terre, sans peau, cuite au four		91.9	75.4	1.96	20.1	1.7	13.5	1.5	0.1	0.026	0.002	0.043	0	0	0.04	1.43	21.7	50	391	9.48	0.15	0.35	0.094	0.24	1.1	3	3.63201	4.65137	0.0774619	0.794379	0.0671863	0.533538	0.059282	0.00395214	0.00102756	7.90427e-05	0.00169942	0	0	0.00158085	0.0565155	0.857613	1.97607	15.4529	0.374662	0.0059282	0.0138325	0.00371501
4003	Pomme de terre, bouillie/cuite à l'eau		80.5	78.3	1.8	16.7	0.86	15.8	1.8	0.34	0.094	0.002	0.043	0	2	0.01	20.6	17.3	37.2	363	5.83	0.074	0.27	0.076	0.15	5	2.5	13.5233	4.83027	0.302385	2.80546	0.144473	2.65426	0.302385	0.0571171	0.0157912	0.000335983	0.00722363	0	0.335983	0.00167991	3.46062	2.90625	6.24928	60.9809	0.97939	0.0124314	0.0453577	0.0127673
4015	Pomme de terre, sautée/poêlée		137	69.9	2.5	17.3	2.2	14	2.6	5.7	1.16	3.58	0.66	0	10.2	0.37	204	28	46	680	18	0.17	0.73	0.15	0.35	10	10	7.05074	4.31208	0.128663	0.890349	0.113224	0.720513	0.13381	0.293352	0.0596997	0.184246	0.0339671	0	0.524945	0.0190421	10.4989	1.44103	2.3674	34.9964	0.926374	0.00874909	0.0375696	0.00771979
4016	Pomme de terre, flocons déshydratés, au lait ou à la crème		348	12.7	0	86.3	1.3	64.9	0.55	0.2	0.039	0.0095	0.11	0	0.5	0	3.75	6	35.6	33.5	27.5	0.1	0.84	0.1	0.16	0.4	0.48	0.210537	0.783453	0	0.0522108	0.00078649	0.039264	0.000332746	0.000120998	2.35947e-05	5.74743e-06	6.65491e-05	0	0.000302496	0	0.00226872	0.00362995	0.0215377	0.0202672	0.0166373	6.04992e-05	0.000508193	6.04992e-05
4022	Pomme de terre, flocons déshydratés, nature		348	12.7	0	86.3	1.3	64.9	0.55	0.2	0.039	0.0095	0.11	0	0.5	0	3.75	6	35.6	33.5	27.5	0.1	0.84	0.1	0.16	0.4	0.48	4.21235	0.783453	0	1.04462	0.0157358	0.78558	0.00665745	0.00242089	0.000472074	0.000114992	0.00133149	0	0.00605223	0	0.0453917	0.0726268	0.430919	0.4055	0.332873	0.00121045	0.0101677	0.00121045
4025	Potatoes ou Wedges ou Quartiers de pommes de terre épicés, surgelées, cuites		174	59.9	3.25	25.3	0	22.6	3.4	5.8	0.64	2.13	2.69	10.5	18	1.39	302	24	84	550	17	0.13	0.7	0.13	0.43	10	10	1.27181	3.69519	0.0237551	0.184924	0	0.165189	0.0248515	0.0423937	0.00467793	0.0155687	0.0196619	0.0767472	0.131567	0.0101599	2.2074	0.175422	0.613978	4.02009	0.124257	0.000950204	0.00511648	0.000950204
4026	Pomme de terre, rôtie/cuite au four		89.4	74.9	2.5	18.5	1.18	17.3	2.2	0.13	0.035	0.003	0.058	0	6	0.04	10	28	70	535	15	0.22	1.08	0.12	0.36	5	3	1.37857	4.62052	0.0385506	0.285274	0.0181959	0.26677	0.0339245	0.00200463	0.000539708	4.62607e-05	0.000894373	0	0.0925213	0.000616809	0.154202	0.431766	1.07942	8.24982	0.231303	0.00339245	0.0166538	0.00185043
4027	Pomme de terre rissolée, surgelée, cuite		137	69.9	2.5	17.3	2.2	14	2.6	5.7	1.16	3.58	0.66	0	10.2	0.37	204	28	46	680	18	0.17	0.73	0.15	0.35	10	10	2.69972	4.31208	0.0492649	0.340913	0.0433531	0.275884	0.0512355	0.112324	0.0228589	0.0705474	0.0130059	0	0.201001	0.00729121	4.02002	0.551767	0.906475	13.4001	0.354708	0.00335002	0.0143854	0.0029559
4028	Pomme de terre de conservation, sans peau, bouillie/cuite à l'eau		76.1	79.7	1.81	15.7	0.1	13.5	1.9	0.25	0.066	0.0054	0.11	0	2.5	0.1	2.5	17	40	390	6.5	0.1	0.31	0.07	0.23	10	10	8.69923	4.91663	0.206907	1.79472	0.0114313	1.54323	0.217195	0.0285783	0.00754467	0.000617291	0.0125744	0	0.285783	0.0114313	0.285783	1.94332	4.57253	44.5821	0.743036	0.0114313	0.0354371	0.00800192
4030	Frites de pommes de terre, surgelées, rôties/cuites au four		213	51.1	3.75	32.6	0.29	30.6	4.2	6.6	0.75	2.24	3.32	10.5	2.5	7.64	156	29	81	590	11	0.15	0.67	0.11	0.45	10	10	2.85233	3.15232	0.050217	0.436553	0.00388345	0.409771	0.0562431	0.088382	0.0100434	0.0299963	0.0444588	0.140608	0.033478	0.102309	2.08903	0.388345	1.08469	7.90081	0.147303	0.00200868	0.00897211	0.00147303
4032	Frites de pommes de terre, surgelées, cuites en friteuse		285	42.5	3.28	39.4	0.69	32.1	3.9	11.9	2.94	5.85	2.54	1	0	0.44	29	23.3	106	684	23.8	0.16	0.9	0.12	0.36	1.1	2.5	33.846	2.62179	0.389525	4.67905	0.0819428	3.81212	0.463155	1.41322	0.349148	0.694733	0.301645	0.118758	0	0.0522534	3.44397	2.76705	12.5883	81.2303	2.82643	0.0190012	0.106882	0.0142509
4047	Pomme de terre, purée (aliment moyen)		91.8	78.7	2.11	12.7	1.49	10.6	1.58	3.25	1.71	0.86	0.3	24.4	13.1	0.17	140	15.5	51.7	238	35.4	0.086	0.26	0.049	0.24	3.51	5.05	7.86882	4.85494	0.180863	1.08861	0.127718	0.9086	0.135433	0.27858	0.146576	0.0737166	0.0257151	2.09149	1.12289	0.0145719	12.0004	1.32861	4.43157	20.4006	3.03438	0.00737166	0.0222864	0.00420013
4090	Fécule de pomme de terre		348	12.7	0	86.3	1.3	64.9	0.55	0.2	0.039	0.0095	0.11	0	0.5	0	3.75	6	35.6	33.5	27.5	0.1	0.84	0.1	0.16	0.4	0.48	0.430835	0.783453	0	0.106842	0.00160944	0.0803482	0.000680917	0.000247606	4.82832e-05	1.17613e-05	0.000136183	0	0.000619016	0	0.00464262	0.00742819	0.0440739	0.041474	0.0340459	0.000123803	0.00103995	0.000123803
4102	Patate douce, cuite		62.8	78	1.69	12.2	6.11	6.14	2.9	0.15	0.042	0.002	0.077	0	10500	0.83	31.5	22.5	43	353	32.5	0.38	0.71	0.13	0.26	5	3	0.0928399	4.81176	0.0024984	0.0180358	0.00903267	0.00907702	0.00428719	0.000221751	6.20904e-05	2.95668e-06	0.000113832	0	15.5226	0.00122702	0.0465678	0.0332627	0.0635687	0.521855	0.0480461	0.00056177	0.00104962	0.000192185
5000	Bière brune		40.5	92.7	0.43	4.1	4.1	0	0	0	0	0	0	0	0	0	11.6	9.55	14	45	6.91	0	0.02	0.07	0.17	0	4.1	0.0666923	5.71859	0.000708091	0.00675157	0.00675157	0	0	0	0	0	0	0	0	0	0.019102	0.0157262	0.0230541	0.0741026	0.0113789	0	3.29345e-05	0.000115271
5001	Bière ""coeur de marché"" (4-5° alcool)		37.1	92.7	0.39	2.7	0.98	0	0	0	0	0	0	0	0	0	1.88	7.2	11.5	36.6	6.05	0.0057	0.01	0.003	0	1.1	4.1	6.12681	5.71859	0.0644058	0.445886	0.16184	0	0	0	0	0	0	0	0	0	0.310469	1.18903	1.89915	6.04424	0.999116	0.000941316	0.00165143	0.000495429
5002	Bière forte (>8° alcool)		62.7	88.8	0.63	4.6	1.77	0	0	0	0	0	0	0	0	0	6.8	9	18.4	64.2	4.3	0.018	0.02	0.009	0.013	0.11	1.5	1.43705	5.478	0.0144392	0.105429	0.0405673	0	0	0	0	0	0	0	0	0	0.155852	0.206275	0.421717	1.47142	0.0985534	0.000412549	0.000458388	0.000206275
5004	Panaché (limonade et bière)		36.2	92.3	0	5.63	5.4	0	0	0	0	0	0	0	0	0	2.07	0.36	9.95	18.9	0.38	0.0004	0.058	0.00095	0.0082	1.1	0.87	0.332085	5.69392	0	0.0516474	0.0495375	0	0	0	0	0	0	0	0	0	0.0189894	0.0033025	0.0912774	0.173381	0.00348597	3.66944e-06	0.000532069	8.71492e-06
5005	Panaché préemballé (<1° alc.)		25.4	94	0.48	4.93	4.92	0	0	0.025	0	0	0	0	0	0	1.37	3.07	9.9	7.47	3.42	0.008	0.006	0.001	0	1.1	1	0.208405	5.79879	0.00393835	0.0404502	0.0403681	0	0	0.000205123	0	0	0	0	0	0	0.0112407	0.0251891	0.0812286	0.0612906	0.0280608	6.56392e-05	4.92294e-05	8.20491e-06
5006	Cidre brut		35.9	93.9	0	2.62	2.22	0	0	0	0	0	0	0	0	0	4.12	2.92	3	95.8	3.24	0.024	0.84	0.0033	0.022	1.1	0.7	0.554994	5.79262	0	0.0405037	0.03432	0	0	0	0	0	0	0	0	0	0.0636929	0.0451416	0.0463783	1.48101	0.0500886	0.000371027	0.0129859	5.10162e-05
5007	Cidre doux		37.5	91.9	0.25	5.09	4.61	0	0	0.3	0	0	0	0	2.5	0	3.9	3.5	6	110	17	0.03	0.1	0.005	0.025	10	10	0.274684	5.66924	0.00183123	0.0372837	0.0337678	0	0	0.00219747	0	0	0	0	0.0183123	0	0.0285671	0.0256372	0.0439494	0.805739	0.124523	0.000219747	0.00073249	3.66245e-05
5008	Bière faiblement alcoolisée (3° alcool)		35.3	93.6	0.31	4.62	0.09	0	0	0.025	0	0	0	0	0	0	1.9	5.97	11.3	34.1	7.08	0.006	0.007	0.004	0	0.13	1.25	0.599564	5.77411	0.00526529	0.0784699	0.00152863	0	0	0.000424621	0	0	0	0	0	0	0.0322712	0.101399	0.191928	0.579182	0.120253	0.000101909	0.000118894	6.79393e-05
5010	Bière ""spéciale"" (5-6° alcool)		56	90.8	0.48	4.55	4	0	0	0.025	0	0	0	0	0	0	1.92	9.84	25	48.8	5.89	0.005	0.006	0.004	0	0.9	1.9	6.71513	5.60138	0.0575583	0.545604	0.479652	0	0	0.00299783	0	0	0	0	0	0	0.230233	1.17994	2.99783	5.85176	0.706288	0.000599565	0.000719478	0.000479652
5011	Bière ""de spécialités"" ou d'abbaye, régionales ou d'une brasserie (degré d'alcool variable)		47.3	91.3	0.63	3.2	1.77	0	0	0	0	0	0	0	0	0	3.7	7.9	21.5	41.6	4.9	0.008	0.012	0.006	0.018	0.11	1.5	0.521694	5.63223	0.00694857	0.0352943	0.0195222	0	0	0	0	0	0	0	0	0	0.0408091	0.0871329	0.237134	0.458826	0.0540444	8.82358e-05	0.000132354	6.61768e-05
5020	Cidre traditionnel		32.5	94.2	0	1.87	1.58	0	0	0	0	0	0	0	0	0	5.35	3.4	3	95.8	8.95	0.02	0.74	0.003	0.02	0	0.7	0.0771458	5.81113	0	0.00443885	0.00375047	0	0	0	0	0	0	0	0	0	0.0126994	0.00807064	0.00712115	0.227402	0.0212448	4.74743e-05	0.00175655	7.12115e-06
5030	Bière sans alcool (<1,2° alcool)		25.3	94	0.31	4.89	2.55	0	0	0.025	0	0	0	0	0	0	1.53	6.2	9.85	29.3	4.75	0.0075	0.011	0.003	0	1.1	1	0.163471	5.79879	0.002003	0.0315958	0.0164763	0	0	0.000161532	0	0	0	0	0	0	0.00988579	0.0400601	0.0636438	0.189316	0.0306912	4.84597e-05	7.10743e-05	1.93839e-05
5100	Pétillant de fruits		65.7	87.6	0	6.95	6.95	0	0	0	0	0	0	0	0	0	3	4	4	30	6	0.05	0.4	0	0.1	1.1	0.7	0.335207	5.40398	0	0.0354595	0.0354595	0	0	0	0	0	0	0	0	0	0.0153063	0.0204084	0.0204084	0.153063	0.0306126	0.000255105	0.00204084	0
5200	Vin blanc 11°		71.4	87.8	0.25	4.04	0.17	0	0	0	0	0	0	0	0	0	2.5	7.3	13.9	84.3	7.1	0.09	0.34	0.005	0.025	10	10	0.814264	5.41632	0.00285107	0.0460732	0.00193872	0	0	0	0	0	0	0	0	0	0.0285107	0.0832511	0.158519	0.961379	0.0809703	0.00102638	0.00387745	5.70213e-05
5201	Vin blanc mousseux		76.1	88.2	0	1.7	1.4	0	0	0	0	0	0	0	0	0	1.41	5.28	7	57	9.16	0.045	0.5	0.00095	0.024	1.1	1	1.69725	5.44099	0	0.0379149	0.0312241	0	0	0	0	0	0	0	0	0	0.0314471	0.117759	0.15612	1.27127	0.204295	0.00100363	0.0111514	2.11878e-05
5204	Vin rouge 11°		82.1	86.8	0.07	2.63	0.62	0	0	0	0	0	0	0	1	0	1.01	7.13	18.7	118	5.96	0.094	0.56	0.0094	0.13	1.1	0.74	0.16918	5.35463	0.000144246	0.00541953	0.00127761	0	0	0	0	0	0	0	0.00206066	0	0.00208126	0.0146925	0.0385343	0.243157	0.0122815	0.000193702	0.00115397	1.93702e-05
5205	Vin rouge 12°		76.5	88.1	0.085	1.58	0.62	0	0	0	0	0	0	0	1	0	1.2	6.93	16.5	114	6.04	0.089	0.61	0.011	0.16	1.1	0.97	26.4992	5.43482	0.0294435	0.547303	0.214764	0	0	0	0	0	0	0	0.346394	0	0.415673	2.40051	5.7155	39.4889	2.09222	0.0308291	0.2113	0.00381034
5206	Vin rosé 11°		71.5	88.9	0	1.6	1.4	0	0	0	0	0	0	0	0	0	4	7	6	75	12	0.1	0.95	0.035	0.027	0.2	1	7.95806	5.48417	0	0.178082	0.155822	0	0	0	0	0	0	0	0	0	0.445206	0.779111	0.667809	8.34762	1.33562	0.0111302	0.105736	0.00389555
5207	Champagne		81.7	86.8	0.3	2.81	1.4	0	0	0	0	0	0	0	0	0	1.93	7.97	7	22.8	7.15	0.049	0.11	0.0062	0.042	5	0.7	3.95301	5.35463	0.0145153	0.13596	0.0677383	0	0	0	0	0	0	0	0	0	0.0933821	0.385624	0.338691	1.10317	0.345949	0.00237084	0.00532229	0.000299984
5209	Vin blanc mousseux aromatisé		83.5	85.6	0.2	5.1	5.1	0	0	0	0	0	0	0	0	0	13	7.13	13	110	14	0.071	0.6	0.0062	0	1.1	1	0.0041127	5.2806	9.85079e-06	0.000251195	0.000251195	0	0	0	0	0	0	0	0	0	0.000640301	0.000351181	0.000640301	0.00541793	0.000689555	3.49703e-06	2.95524e-05	3.05374e-07
5210	Vin (aliment moyen)		84.2	86.2	0.09	3.29	1.37	0	0	0	0	0	0	0	0.69	0	2.7	7.25	14.3	100	7.52	0.091	0.58	0.017	0.088	2.03	2.07	0.205986	5.31761	0.000220175	0.00804864	0.00335156	0	0	0	0	0	0	0	0.00168801	0	0.00660526	0.0177364	0.0349834	0.244639	0.0183969	0.000222622	0.00141891	4.15887e-05
5211	Vin blanc sec 11°		71.4	87.8	0.25	4.04	0.17	0	0	0	0	0	0	0	0	0	2.5	7.3	13.9	84.3	7.1	0.09	0.34	0.005	0.025	10	10	3.4524	5.41632	0.0120882	0.195346	0.00822	0	0	0	0	0	0	0	0	0	0.120882	0.352977	0.672106	4.07616	0.343306	0.00435177	0.01644	0.000241765
6100	Boeuf, entrecôte, partie maigre, grillée/poêlée		198	62.3	25.5	0.05	0	0	0	10.7	4.75	4.08	0.38	7	0	0.58	58	23	200	279	12	0.013	2.55	0.085	6.34	12.3	6	3.86489	3.84324	0.497751	0.000975981	0	0	0	0.20886	0.0927182	0.0796401	0.00741746	0.136637	0	0.0113214	1.13214	0.448951	3.90393	5.44598	0.234236	0.000253755	0.0497751	0.00165917
6101	Boeuf, braisé		240	55.7	32.1	0	0	0	0	12.4	5.72	4.95	0.33	3	0	0.29	59	24.3	200	330	11.4	0.013	5.9	0.09	10.5	10.3	6	0.84754	3.43609	0.113358	0	0	0	0	0.0437895	0.0201997	0.0174805	0.00116537	0.0105942	0	0.00102411	0.208353	0.0858134	0.706283	1.16537	0.0402581	4.59084e-05	0.0208353	0.000317827
6104	Boeuf, gîte à la noix, cuit		102	72.5	21	0.2	0	0	0	1.9	0.8	0.72	0.16	3	0	0.29	59	23	200	330	11.4	0.013	2.04	0.09	4.2	10.3	5	0.0462825	4.47247	0.00952875	9.075e-05	0	0	0	0.000862125	0.000363	0.0003267	7.26e-05	0.00136125	0	0.000131587	0.0267712	0.0104362	0.09075	0.149737	0.00517275	5.89875e-06	0.00092565	4.08375e-05
6105	Boeuf, faux-filet, rôti/cuit au four		182	64.3	27.1	0	0	0	0	8.17	3.39	3.34	0.33	0	0	0.44	56	22	209	336	20	0.009	2.26	0.081	3.95	12.9	6	0.817383	3.96662	0.121709	0	0	0	0	0.0366924	0.0152249	0.0150003	0.00148207	0	0	0.00197609	0.251503	0.0988046	0.938643	1.50902	0.0898223	4.042e-05	0.0101499	0.00036378
6110	Boeuf, faux-filet, grillé/poêlé		182	64.3	27.1	0	0	0	0	8.17	3.39	3.34	0.33	0	0	0.44	56	22	209	336	20	0.009	2.26	0.081	3.95	12.9	6	1.74244	3.96662	0.259451	0	0	0	0	0.0782182	0.0324553	0.0319766	0.00315936	0	0	0.00421249	0.536135	0.210624	2.00093	3.21681	0.191477	8.61645e-05	0.0216369	0.00077548
6123	Boeuf, plat de côtes, braisé		269	48.9	37.3	0	0	0	0	13.3	5.58	5.26	0.54	0	0	0.29	50	15	162	224	12	0.013	1.41	0.099	8.02	18.4	5	0.109387	3.0166	0.0151678	0	0	0	0	0.00540836	0.00226907	0.00213894	0.000219587	0	0	0.000117927	0.0203322	0.00609965	0.0658762	0.0910881	0.00487972	5.28636e-06	0.000573367	4.02577e-05
6131	Boeuf, hampe, grillée/poêlée		174	67.6	21.6	0	0	0	0	9.76	4.36	3.3	0.51	3	0	0.29	59	23	200	330	11.4	0.013	3.79	0.09	5.11	13.4	5	0.233212	4.17019	0.0289505	0	0	0	0	0.0130813	0.0058437	0.00442299	0.000683553	0.0040209	0	0.000388687	0.0790777	0.0308269	0.26806	0.442299	0.0152794	1.74239e-05	0.00507973	0.000120627
6141	Boeuf, joue, braisée ou bouillie		236	52.9	39.2	0	0	0	0	8.82	3.19	3.08	0.9	3	0	0.29	59	23	200	330	11.4	0.013	2.04	0.09	4.75	25.3	5	0.228487	3.26336	0.0379521	0	0	0	0	0.00853922	0.00308845	0.00298195	0.000871349	0.0029045	0	0.000280768	0.0571218	0.0222678	0.193633	0.319495	0.0110371	1.25862e-05	0.00197506	8.71349e-05
6151	Boeuf, jarret, bouilli/cuit à l'eau		161	67.4	31	0	0	0	0	4.1	1.13	1.62	0.22	3	0	0.53	59	23	200	330	11.4	0.013	3.9	0.09	11	2.8	5	0.0318755	4.15786	0.00613752	0	0	0	0	0.000811737	0.000223723	0.000320735	4.35566e-05	0.000593954	0	0.000104932	0.0116811	0.00455364	0.0395969	0.0653349	0.00225702	2.5738e-06	0.00077214	1.78186e-05
6200	Boeuf, steak ou bifteck, grillé		128	69.1	27.6	0	0	0	0	1.95	0.9	0.83	0.055	3	0	0.29	63.9	28.9	200	371	7.07	0.012	2.21	0.076	5.39	5	6	12.2089	4.26273	2.63254	0	0	0	0	0.185995	0.0858436	0.0791669	0.005246	0.286145	0	0.0276607	6.0949	2.75653	19.0764	35.3867	0.67435	0.00114458	0.210794	0.00724902
6201	Boeuf, steak ou bifteck, cru		128	69.1	27.6	0	0	0	0	1.95	0.9	0.83	0.055	3	0	0.29	63.9	28.9	200	371	7.07	0.012	2.21	0.076	5.39	5	6	0.0228569	4.26273	0.00492853	0	0	0	0	0.000348211	0.000160713	0.000148213	9.82135e-06	0.00053571	0	5.17853e-05	0.0114106	0.00516067	0.035714	0.0662494	0.00126249	2.14284e-06	0.00039464	1.35713e-05
6205	Boeuf, onglet, grillé		171	67.6	23	0	0	0	0	8.8	3.28	3.36	0.75	3	0	0.53	59	23	200	330	11.4	0.013	4	0.09	6	4.1	5	0.358731	4.17019	0.0482504	0	0	0	0	0.018461	0.00688092	0.00704875	0.00157338	0.00629353	0	0.00111186	0.123773	0.0482504	0.419568	0.692288	0.0239154	2.72719e-05	0.00839137	0.000188806
6207	Boeuf, rumsteck, grillé		123	68.7	25	0	0	0	0	2.5	0.74	0.74	0.16	3	0	0.44	59	23	200	330	11.4	0.013	2.9	0.09	4.2	4.6	5	0.806676	4.23805	0.163958	0	0	0	0	0.0163958	0.00485317	0.00485317	0.00104933	0.019675	0	0.00288567	0.386942	0.150842	1.31167	2.16425	0.0747651	8.52584e-05	0.0190192	0.000590251
6208	Boeuf, boule de macreuse, grillée/poêlée		144	68.8	26.7	0	0	0	0	4.11	1.53	1.52	0.31	3	0	0.29	59	23	200	330	11.4	0.013	2.86	0.09	5.62	13	5	0.0362088	4.24422	0.00671371	0	0	0	0	0.00103346	0.000384718	0.000382204	7.79494e-05	0.000754349	0	7.29204e-05	0.0148355	0.00578334	0.05029	0.0829784	0.00286653	3.26885e-06	0.000719146	2.26305e-05
6210	Boeuf, rosbif, rôti/cuit au four		117	72.5	21.9	0.3	0	0	0	3.16	0.62	0.67	0.29	0	0	0.2	70.4	32	203	369	10.1	0.012	3.1	0.1	5.43	16.1	2.5	2.41906	4.47247	0.452798	0.00620272	0	0	0	0.0653353	0.0128189	0.0138527	0.00599596	0	0	0.00413515	1.45557	0.661623	4.19717	7.62934	0.208825	0.000248109	0.0640947	0.00206757
6211	Boeuf, bavette d'aloyau, grillée/poêlée		162	67.8	25	0	0	0	0	6.94	2.73	2.79	0.39	3	0	0.54	59	24.8	200	330	11.4	0.013	3.38	0.09	8.33	13.5	5	0.890819	4.18253	0.137472	0	0	0	0	0.0381622	0.0150119	0.0153419	0.00214456	0.0164966	0	0.0029694	0.324434	0.136372	1.09978	1.81463	0.0626872	7.14854e-05	0.0185862	0.000494899
6230	Boeuf, à bourguignon ou pot-au-feu, cuit		172	59.4	34	0	0	0	0	4.05	2.77	0.98	0.11	3	0	0.51	59	23	171	330	11.4	0.013	4.3	0.09	9.7	4.1	6	3.71823	3.66434	0.734999	0	0	0	0	0.0875513	0.0598808	0.0211853	0.00237794	0.0648528	0	0.011025	1.27544	0.497205	3.69661	7.13381	0.246441	0.000281029	0.0929557	0.00194559
6250	Bœuf, steak haché 5% MG, cru		130	74	21.9	0.3	0	0	0	4.59	1.64	1.86	0.3	4	0	0.2	37.8	22	184	353	7	0.011	2.65	0.082	4.54	6.72	0.8	0.00898998	4.565	0.00151447	2.07461e-05	0	0	0	0.000317415	0.000113412	0.000128626	2.07461e-05	0.000276615	0	1.38307e-05	0.00261401	0.00152138	0.0127243	0.0244112	0.000484076	7.6069e-07	0.000183257	5.6706e-06
6251	Bœuf, steak haché 5% MG, cuit		155	68.9	25.5	0	0	0	0	5.85	2.67	2.59	0.31	3	0	0.12	65	22	180	347	7	0.014	2.83	0.096	6.43	10.3	6.1	1.53962	4.25039	0.253293	0	0	0	0	0.0581084	0.0265213	0.0257266	0.00307925	0.0297992	0	0.00119197	0.645649	0.218527	1.78795	3.44677	0.0695314	0.000139063	0.0281106	0.000953574
6253	Bœuf, steak haché 10% MG, cuit		210	61.2	26.1	0	0	0	0	11.8	4.63	4.94	0.42	3	0	0.12	68	22	202	333	13	0.013	2.71	0.09	6.37	10.3	6.1	1.30946	3.77538	0.162747	0	0	0	0	0.0735792	0.0288705	0.0308035	0.00261892	0.0187066	0	0.000748263	0.424015	0.137181	1.25958	2.07643	0.0810618	8.10618e-05	0.0168983	0.000561197
6254	Bœuf, steak haché 15% MG, cru		209	67.2	20.2	0.47	0	0	0	14.1	5.71	6.06	0.55	9.5	0	0.26	41.7	20	171	302	9.33	0.011	2.64	0.069	4.8	6.78	1	0.219332	4.14552	0.0211986	0.000493236	0	0	0	0.0147971	0.00599229	0.00635959	0.000577191	0.00996966	0	0.000272854	0.0437615	0.0209887	0.179454	0.31693	0.00979125	1.15438e-05	0.00277051	7.24112e-05
6255	Bœuf, steak haché 15% MG, cuit		239	59.1	23.6	0	0	0	0	16.1	7.08	6.62	0.96	3	0	0.12	84.3	29.5	198	318	15	0.06	2.6	0.078	4.9	2.5	6.1	20.946	3.64583	2.06831	0	0	0	0	1.41101	0.620492	0.580178	0.0841346	0.262921	0	0.0105168	7.38807	2.58539	17.3528	27.8696	1.3146	0.00525841	0.227864	0.00683593
6256	Bœuf, steak haché 20% MG, cru		249	61.9	17.3	0	0	0	0	20	7.99	8.85	0.52	4	0	0.17	64	17	158	270	12.7	0.01	1.94	0.061	4.18	12.7	6.8	0.0431848	3.81856	0.00300039	0	0	0	0	0.00346866	0.00138573	0.00153488	9.01851e-05	0.000693732	0	2.94836e-05	0.0110997	0.00294836	0.0274024	0.0468269	0.0022026	1.73433e-06	0.00033646	1.05794e-05
6257	Bœuf, steak haché 20% MG, cuit		265	56.7	23	0.14	0	0	0	19.2	8.14	7.9	0.52	3	0	0.12	75	20	115	304	24	0.011	2.48	0.08	4.3	19.4	6.1	0.341144	3.49778	0.0296087	0.000180227	0	0	0	0.0247168	0.0104789	0.01017	0.000669414	0.00386201	0	0.00015448	0.0965502	0.0257467	0.148044	0.39135	0.0308961	1.41607e-05	0.00319259	0.000102987
6271	Boeuf, paleron, braisé ou bouilli		251	51.8	36.8	0.2	0	0	0	11.4	4.5	4.53	0.6	7	0	0.11	67	22	230	298	14	0.025	1.63	0.14	9.57	17.7	5	0.580333	3.1955	0.0850846	0.000462417	0	0	0	0.0263577	0.0104044	0.0104737	0.00138725	0.0161846	0	0.000254329	0.15491	0.0508658	0.531779	0.689001	0.0323692	5.78021e-05	0.00376869	0.000323692
6310	Boeuf, queue, bouillie/cuite à l'eau		196	62	28	0	0	0	0	9.3	3.72	4.43	0.18	3	0	0.16	59	23	200	330	11.4	0.013	2.9	0.09	8	10.3	5	0.0443245	3.82473	0.00633207	0	0	0	0	0.00210315	0.000841261	0.00100182	4.07062e-05	0.000678436	0	3.61833e-05	0.0133426	0.00520134	0.0452291	0.074628	0.00257806	2.93989e-06	0.000655822	2.03531e-05
6400	Corned beef		188	63.4	23.1	0.05	0.1	0	0.75	10.5	4.54	5.29	0.45	0	0	0.15	781	14	111	244	14.5	0.014	2.24	0.064	3.57	9.22	3	0.0086119	3.9111	0.00105816	2.2904e-06	4.5808e-06	0	3.4356e-05	0.000480984	0.000207968	0.000242324	2.06136e-05	0	0	6.8712e-06	0.035776	0.000641312	0.00508469	0.0111771	0.000664216	6.41312e-07	0.00010261	2.93171e-06
6511	Veau, côte, grillée/poêlée		156	69.4	25.1	0	0	0	0	6.24	2.11	2.55	0.62	68	15	0.49	100	22.5	196	305	29	0.05	1.3	0.05	6.54	8.98	31	0.953125	4.28123	0.153355	0	0	0	0	0.038125	0.0128916	0.0155799	0.00378806	0.415465	0.0916467	0.00299379	0.610978	0.13747	1.19752	1.86348	0.177184	0.000305489	0.00794271	0.000305489
6512	Veau, carré, sauté/poêlé		171	66.5	28	0	0	0	0	6.6	2.64	2.2	1.26	3	0	0.46	59	23	200	330	11.4	0.013	1	0.09	7.6	10.3	5	0.686525	4.10233	0.112413	0	0	0	0	0.0264974	0.010599	0.00883248	0.0050586	0.0120443	0	0.00184679	0.236871	0.0923396	0.802953	1.32487	0.0457683	5.21919e-05	0.00401476	0.000361329
6520	Veau, escalope, cuite		147	65	31	0	0	0	0	2.5	0.82	0.69	0.46	3	0	0.11	58.9	29.5	200	330	10.8	0.012	1	0.067	3.21	6.22	6	1.48151	4.0098	0.312427	0	0	0	0	0.0251957	0.00826419	0.00695402	0.00463601	0.0302349	0	0.00110861	0.593611	0.297309	2.01566	3.32583	0.108845	0.000120939	0.0100783	0.000675245
6523	Veau, noix, grillée/poêlée		147	67.2	29.1	0	0	0	0	3.44	1.06	1.23	0.48	3	0	0.29	59	23	200	330	11.4	0.013	0.92	0.09	3.52	9.26	5	0.0124938	4.14552	0.00247326	0	0	0	0	0.000292371	9.00911e-05	0.00010454	4.0796e-05	0.000254975	0	2.46476e-05	0.00501451	0.00195481	0.0169983	0.0280472	0.000968904	1.10489e-06	7.81923e-05	7.64925e-06
6524	Veau, noix, rôtie		147	67.2	29.1	0	0	0	0	3.44	1.06	1.23	0.48	3	0	0.29	59	23	200	330	11.4	0.013	0.92	0.09	3.52	9.26	5	0.366549	4.14552	0.0725618	0	0	0	0	0.00857775	0.00264314	0.00306704	0.0011969	0.0074806	0	0.000723124	0.147118	0.0573512	0.498706	0.822866	0.0284263	3.24159e-05	0.00229405	0.000224418
6531	Veau, filet, rôti/cuit au four		201	60.7	23.4	0.5	0	0	0	11.7	4.13	4.78	0.81	0	0	0.44	93	25	212	325	19	0.029	0.87	0.11	3.03	13	6	0.150377	3.74454	0.0175066	0.000374073	0	0	0	0.00875331	0.00308984	0.00357614	0.000605998	0	0	0.000329184	0.0695776	0.0187037	0.158607	0.243148	0.0142148	2.16962e-05	0.000650887	8.22961e-05
6536	Veau, steak haché 15% MG, cru		169	63.7	29	0.74	0.028	0.68	0.053	5.55	1.79	2.2	0.77	10.2	1.74	0.57	101	27	206	338	14.9	0.035	0.95	0.085	4.46	8.78	8.39	0.168913	3.9296	0.0289851	0.000739619	2.79856e-05	0.00067965	5.29727e-05	0.00554714	0.00178908	0.00219887	0.000769604	0.0101948	0.0017391	0.000569707	0.100948	0.0269861	0.205894	0.337826	0.0148923	3.4982e-05	0.000949511	8.49563e-05
6540	Veau, poitrine, crue		169	63.7	29	0.74	0.028	0.68	0.053	5.55	1.79	2.2	0.77	10.2	1.74	0.57	101	27	206	338	14.9	0.035	0.95	0.085	4.46	8.78	8.39	0.0015891	3.9296	0.000272686	6.95821e-06	2.63283e-07	6.39403e-06	4.98358e-07	5.21865e-05	1.68313e-05	2.06866e-05	7.24029e-06	9.59104e-05	1.63612e-05	5.3597e-06	0.000949701	0.00025388	0.00193701	0.00317821	0.000140104	3.29104e-07	8.93283e-06	7.99253e-07
6550	Veau, rôti, cru		143	67	28.1	0	0	0	0	3.39	1.22	1.19	0.29	0	0	0.55	68	28	236	393	6	0.031	0.9	0.13	3.08	10.3	5	0.326574	4.13318	0.064173	0	0	0	0	0.00774187	0.00278616	0.00271765	0.000662284	0	0	0.00125606	0.155294	0.0639446	0.538962	0.897509	0.0137024	7.07959e-05	0.00205536	0.000296886
6551	Veau, rôti, cuit		143	67	28.1	0	0	0	0	3.39	1.22	1.19	0.29	0	0	0.55	68	28	236	393	6	0.031	0.9	0.13	3.08	10.3	5	0.627168	4.13318	0.123241	0	0	0	0	0.0148678	0.00535066	0.00521909	0.00127188	0	0	0.00241218	0.298234	0.122802	1.03505	1.72362	0.0263147	0.000135959	0.00394721	0.000570153
6562	Veau, épaule, grillée/poêlée		166	66.5	27.6	0	0	0	0	6.17	2.07	2.48	0.63	3	0	0.29	59	23	200	330	11.4	0.013	1.16	0.09	5.3	9.2	5	0.287934	4.10233	0.0478734	0	0	0	0	0.0107021	0.00359051	0.00430167	0.00109276	0.00520363	0	0.000503018	0.102338	0.0398945	0.346909	0.5724	0.0197738	2.25491e-05	0.00201207	0.000156109
6563	Veau, épaule, braisée ou bouillie		219	55.9	36.4	0	0	0	0	8.14	2.91	3.49	0.88	3	0	0.29	59	23	200	330	11.4	0.013	0.74	0.09	6.99	12.1	5	0.658406	3.44843	0.109434	0	0	0	0	0.0244723	0.00874869	0.0104924	0.00264565	0.00901926	0	0.000871862	0.177379	0.0691477	0.601284	0.992119	0.0342732	3.90835e-05	0.00222475	0.000270578
6581	Veau, jarret, braisé ou bouilli		207	56.7	37.4	0	0	0	0	6.43	1.95	2.74	0.66	3	0	0.33	59	23	200	330	11.4	0.013	0.77	0.09	8.81	11.1	5	0.144281	3.49778	0.0260681	0	0	0	0	0.00448176	0.00135916	0.0019098	0.000460025	0.00209102	0	0.000230012	0.0411234	0.0160312	0.139401	0.230012	0.00794588	9.0611e-06	0.000536696	6.27307e-05
6582	Veau, tête, bouillie/cuite à l'eau		187	67.6	21	0	0	0	0	11.4	4.18	5.22	0.94	3	0	0.57	59	23	200	330	11.4	0.013	0.7	0.09	1.6	10.3	5	0.158021	4.17019	0.0177457	0	0	0	0	0.00963338	0.00353224	0.00441107	0.000794331	0.0025351	0	0.000481669	0.049857	0.0194358	0.169007	0.278861	0.00963338	1.09854e-05	0.000591523	7.6053e-05
6591	Veau, collier, braisé ou bouilli		233	53.9	34.9	0	0	0	0	10.4	3.5	4.45	0.91	3	0	0.34	59	23	200	330	11.4	0.013	0.65	0.09	7.54	12.7	5	0.058946	3.32505	0.00882925	0	0	0	0	0.00263106	0.000885455	0.00112579	0.000230218	0.000758961	0	8.60156e-05	0.0149262	0.0058187	0.0505974	0.0834857	0.00288405	3.28883e-06	0.000164442	2.27688e-05
6900	Cheval, viande, crue		167	70	18.8	0.6	0	0	0	10	3.64	3.35	2.41	21	0	0.23	62	20	185	291	10	0.02	3.5	0.14	4.61	6	1	0.100361	4.31825	0.0112981	0.000360578	0	0	0	0.00600963	0.00218751	0.00201323	0.00144832	0.0126202	0	0.000138222	0.0372597	0.0120193	0.111178	0.17488	0.00600963	1.20193e-05	0.00210337	8.41349e-05
6902	Cheval, viande, rôtie/cuite au four		138	68.6	28	0	0	0	0	2.85	2.41	0.12	0.078	18	0	1.15	39.8	28.1	214	333	4.8	0.05	3.4	0.16	3.1	5	4	0.0731154	4.23188	0.014835	0	0	0	0	0.00150999	0.00127687	6.35786e-05	4.13261e-05	0.00953679	0	0.000609295	0.0210869	0.014888	0.113382	0.176431	0.00254314	2.64911e-05	0.00180139	8.47715e-05
6906	Cheval, tende de tranche, grillée/poêlée		135	68.7	27.9	0	0	0	0	2.58	0.77	0.68	0.54	3	0	0.29	59	23	200	330	11.4	0.013	3.99	0.09	3.32	7.47	5	1.4084	4.23805	0.291069	0	0	0	0	0.0269161	0.00803309	0.00709416	0.0056336	0.0312978	0	0.00302545	0.615523	0.239949	2.08652	3.44275	0.118931	0.000135624	0.041626	0.000938933
6908	Cheval, entrecôte, grillée/poêlée		169	64.4	28.2	0	0	0	0	6.24	1.99	2.03	1.01	3	0	0.29	59	23	200	330	11.4	0.013	3.38	0.09	3.18	7.92	5	0.166073	3.97279	0.0277116	0	0	0	0	0.00613193	0.00195554	0.00199484	0.000992508	0.00294804	0	0.000284977	0.0579782	0.0226017	0.196536	0.324285	0.0112026	1.27749e-05	0.00332146	8.84413e-05
7352	Galette de riz soufflé complet		384	4.8	7.32	80.5	0.73	71.7	2.9	3	0.54	1.17	1.17	0	25	1.01	72.6	160	410	300	12	2.8	1.1	0.23	1.8	10	10	0.555978	0.296108	0.0105983	0.116553	0.00105694	0.103812	0.00419879	0.00434358	0.000781844	0.001694	0.001694	0	0.0361965	0.00146234	0.105115	0.231658	0.593622	0.434358	0.0173743	0.00405401	0.00159265	0.000333008
7813	Tortilla souple (à garnir), à base de maïs		313	26	9.06	54.7	2.6	40	2.8	5.8	0.78	3.49	1.25	0	12.7	1.04	430	20	280	120	23	0.31	0.81	0.09	0.63	10	10	2.41	1.60392	0.0697591	0.421172	0.0200192	0.307987	0.0215591	0.0446581	0.00600575	0.0268719	0.0096246	0	0.0977859	0.00800766	3.31086	0.153994	2.15591	0.923961	0.177093	0.0023869	0.00623674	0.000692971
8001	Rillettes pur porc		414	44	16.7	0.13	0.1	0.18	0.25	38.3	15.2	16.4	4.87	26.9	2.5	1.13	389	15	130	240	6.9	0.03	0.91	0.06	2.3	10	10	1.59935	2.71433	0.064515	0.000502213	0.000386318	0.000695372	0.000965794	0.14796	0.0587203	0.0633561	0.0188137	0.103919	0.00965794	0.00436539	1.50278	0.0579476	0.502213	0.927162	0.0266559	0.000115895	0.00351549	0.000231791
8026	Rillettes de canard		377	47.3	15.3	1.03	0	0.18	0	34.6	11.2	16.8	4.9	27.5	2.5	0.6	500	19	200	210	140	0.08	1.6	0.1	2.5	10	10	0.103415	2.9179	0.00419696	0.00028254	0	4.93759e-05	0	0.00949115	0.00307228	0.00460842	0.00134412	0.00754355	0.000685777	0.000164586	0.137155	0.00521191	0.0548622	0.0576053	0.0384035	2.19449e-05	0.000438897	2.74311e-05
8030	Rillettes d'oie		364	48.9	14.9	0.99	0.1	0.18	0	33.4	9.82	17.5	4.46	37	2.5	0.04	516	13	110	200	10	0.07	1	0.11	1.6	10	10	0.0990377	3.0166	0.00405401	0.000269361	2.72082e-05	4.89747e-05	0	0.00908752	0.00267184	0.00476143	0.00121348	0.010067	0.000680204	1.08833e-05	0.140394	0.00353706	0.029929	0.0544163	0.00272082	1.90457e-05	0.000272082	2.9929e-05
8040	Rillettes de poulet		340	52.2	16.4	0.49	0.36	0.13	0.25	30.3	10.7	14.4	4.25	27.5	2.5	0.6	470	15	130	210	10	0.07	1	0.1	2.3	10	10	0.618311	3.22018	0.0298244	0.000891095	0.000654682	0.000236413	0.00045464	0.0551024	0.0194586	0.0261873	0.00772889	0.0500104	0.0045464	0.00109114	0.854724	0.0272784	0.236413	0.381898	0.0181856	0.000127299	0.00181856	0.000181856
8059	Rillettes de crabe		192	65	12.2	3.5	1.6	0	3.5	13.6	1.1	7.8	3.58	14	0	4.33	440	16.3	107	127	14.6	0.05	0.5	0.05	0.7	11.5	17.5	0.0413433	4.0098	0.00262702	0.000753654	0.000344527	0	0.000753654	0.00292848	0.000236863	0.00167957	0.00077088	0.00301462	0	0.000932377	0.0947451	0.00350987	0.0230403	0.0273469	0.00314381	1.07665e-05	0.000107665	1.07665e-05
8081	Rillettes de saumon		237	62.8	15.1	2	0.9	0	1.6	18.4	2.4	8.9	5.84	6	0	4.65	510	21	130	222	14	0.05	0.4	0.05	0.4	20	10	0.131688	3.87408	0.00839024	0.00111129	0.000500081	0	0.000889032	0.0102239	0.00133355	0.00494524	0.00324497	0.00333387	0	0.00258375	0.283379	0.0116685	0.0722339	0.123353	0.00777903	2.77823e-05	0.000222258	2.77823e-05
8082	Rillettes de thon		199	63.5	16.4	1.65	1.2	0	1.4	13.8	1.1	6.7	5.35	5	0	7.09	490	25.5	121	202	18.4	0.05	0.7	0.05	0.5	8	6	0.417542	3.91727	0.0344105	0.00346203	0.00251784	0	0.00293748	0.0289551	0.00230802	0.0140579	0.0112254	0.010491	0	0.0148762	1.02812	0.0535041	0.253882	0.423836	0.0386069	0.00010491	0.00146874	0.00010491
8083	Rillettes de maquereau, préemballées		246	62.8	11	1	0	0	0	22	3.82	7.12	6.98	14	0	4.33	665	16.3	107	127	14.6	0.05	0.5	0.05	0.7	11.5	17.5	0.0806947	3.87408	0.0036083	0.000328027	0	0	0	0.0072166	0.00125306	0.00233555	0.00228963	0.00459238	0	0.00142036	0.218138	0.00534684	0.0350989	0.0416595	0.0047892	1.64014e-05	0.000164014	1.64014e-05
8110	Confit de canard		273	49.7	25.7	0.15	0.14	0.5	0.4	18.8	7.26	8.89	1.78	21	15	0.46	568	18.8	179	241	5.3	0.05	2.7	0.05	5.7	28	17	0.162003	3.06596	0.0152508	8.90124e-05	8.30782e-05	0.000296708	0.000237366	0.0111562	0.0043082	0.00527547	0.00105628	0.0124617	0.00890124	0.000272971	0.33706	0.0111562	0.106221	0.143013	0.0031451	2.96708e-05	0.00160222	2.96708e-05
8111	Canard, magret fumé		364	41.4	21.9	0.55	0.55	0	0	30.5	11.3	13.7	3.32	7	0	0.41	1310	13.8	149	209	20.2	0.05	1.1	0.08	1.5	10	12	0.172315	2.55393	0.0103673	0.000260366	0.000260366	0	0	0.0144385	0.00534933	0.00648547	0.00157166	0.00331374	0	0.000194091	0.620143	0.00653281	0.0705354	0.0989389	0.00956252	2.36696e-05	0.000520731	3.78713e-05
8206	Pâté au jambon		318	56.6	15.2	0	0.52	0	0	28.6	10.7	11.6	3.65	2500	0	0.65	72	26	175	180	18	0.16	5.5	0.45	2.37	21	10	0.00582463	3.49161	0.00027841	0	9.52455e-06	0	0	0.00052385	0.000195986	0.000212471	6.6855e-05	0.0457911	0	1.19057e-05	0.00131878	0.000476227	0.00320538	0.00329696	0.000329696	2.93063e-06	0.00010074	8.2424e-06
8211	Pâté ou terrine de campagne		323	52.2	15.5	1.5	0.62	0.88	0	28.2	10.4	12.5	3.89	2500	0	0.38	617	15.4	185	212	12.3	0.15	6.1	0.92	3.13	17.2	10	7.67084	3.22018	0.368105	0.0356231	0.0147242	0.0208989	0	0.669714	0.246987	0.296859	0.0923825	59.3718	0	0.00902452	14.653	0.36573	4.39351	5.03473	0.292109	0.00356231	0.144867	0.0218488
8232	Terrine de canard		320	50.7	13.2	4.44	1.3	0.88	1.75	27.1	9.91	12.4	3.49	4350	0	0.89	554	16	170	210	23	0.16	5.2	0.62	2.6	40	10	0.111599	3.12764	0.00460347	0.00154844	0.000453372	0.000306898	0.000610309	0.00945107	0.00345609	0.00432448	0.00121713	1.51705	0	0.000310386	0.193206	0.00557997	0.0592872	0.0732371	0.00802121	5.57997e-05	0.00181349	0.000216224
8240	Pâté de lapin		247	61.5	16.3	0.00027	0.00016	0.00011	0	20.2	8.8	8.19	2.2	4000	0	0.4	341	26	212	311	12.5	0.16	3.05	0.45	2.37	21	4	0.186284	3.79389	0.0122932	2.0363e-07	1.2067e-07	8.29604e-08	0	0.0152346	0.00663683	0.00617678	0.00165921	3.01674	0	0.000301674	0.257177	0.0196088	0.159887	0.234552	0.00942732	0.00012067	0.00230027	0.000339384
8242	Terrine de lapin		281	53.8	16.5	5.67	0.95	0.88	1	21.2	7.9	8.59	2.7	2500	0	0.65	738	15.6	175	180	15.3	0.16	5.5	0.45	2.37	21	10	0.0202249	3.31888	0.00118758	0.000408096	6.83759e-05	6.33377e-05	7.19747e-05	0.00152586	0.0005686	0.000618262	0.000194332	0.179937	0	4.67835e-05	0.0531173	0.0011228	0.0125956	0.0129554	0.00110121	1.15159e-05	0.000395861	3.23886e-05
8245	Pâté de gibier		284	56	15	4	2	0.88	0.5	23	9	9.32	2.93	2500	0	0.65	610	15.6	175	180	15.3	0.16	5.5	0.45	2.37	21	10	0.568537	3.4546	0.0300284	0.00800756	0.00400378	0.00176166	0.00100095	0.0460435	0.018017	0.0186576	0.00586554	5.00473	0	0.00130123	1.22115	0.0312295	0.350331	0.36034	0.0306289	0.000320302	0.0110104	0.000900851
8305	Pâté de foie de porc		355	50.7	10.8	2.91	1.38	0.88	0.2	33.3	11.6	13.5	4.2	8800	0	1.07	671	14.1	163	180	11	0.14	6.08	0.49	2.68	21	30.2	1.36971	3.12764	0.0416702	0.0112278	0.00532452	0.00339535	0.00077167	0.128483	0.0447569	0.0520877	0.0162051	33.9535	0	0.00412844	2.58895	0.0544027	0.628911	0.694503	0.0424419	0.000540169	0.0234588	0.00189059
8315	Mousse de canard		395	44.4	10.1	7.07	2.05	0.88	0.45	36.1	13.7	13.1	6.18	2500	0	0.65	627	15.6	175	180	15.3	0.16	5.5	0.45	2.37	21	10	0.261525	2.739	0.00668709	0.00468097	0.00135728	0.000582638	0.00029794	0.0239014	0.00907061	0.00867336	0.00409171	1.65522	0	0.000430358	0.41513	0.0103286	0.115865	0.119176	0.01013	0.000105934	0.00364149	0.00029794
8316	Pâté de foie de volaille		269	59.8	13.8	1.96	0.81	0.88	0	22.9	7.12	8.87	3.98	217	0	0.98	467	13	175	95	10	0.16	9.19	0.18	2.14	21	10	0.37508	3.68902	0.019242	0.00273293	0.00112942	0.00122703	0	0.0319306	0.00992778	0.0123679	0.00554952	0.302574	0	0.00136646	0.651162	0.0181266	0.244011	0.132463	0.0139435	0.000223096	0.0128141	0.000250983
8321	Foie gras, canard, entier, cuit		535	35.1	8.41	2.32	1.71	0.19	0.35	54.6	23	29.6	0.86	5400	0	0.41	440	9.33	149	135	5.68	0.11	4.13	0.91	1.19	12.3	12	1.04177	2.16529	0.0163762	0.00451758	0.00332977	0.000369974	0.000681531	0.106319	0.0447863	0.057638	0.00167462	10.515	0	0.000798365	0.856782	0.0181677	0.290137	0.262876	0.0110603	0.000214195	0.00804207	0.00177198
8324	Foie gras, canard, bloc, 30% de morceaux		489	39.1	6.88	2.43	1.41	0.19	0	50.1	21.6	27.1	0.76	7	0	0.41	514	13.8	149	209	20.2	0.05	2.1	0.08	1.5	10	12	1.64654	2.41205	0.0231661	0.0081822	0.00474769	0.00063976	0	0.168695	0.0727306	0.09125	0.00255904	0.0235701	0	0.00138054	1.73072	0.0464668	0.501707	0.703736	0.0680166	0.000168358	0.00707103	0.000269373
8326	Pâté de foie d'oie		459	37	11.4	4.67	1.34	0.88	0	43.8	14.5	25.6	0.84	1000	0	0.65	697	13	200	138	70	0.12	5.5	0.4	0.92	21	10	0.0766597	2.2825	0.00190397	0.000779959	0.0002238	0.000146973	0	0.00731524	0.00242171	0.00427558	0.000140292	0.167015	0	0.00010856	0.116409	0.00217119	0.0334029	0.023048	0.011691	2.00418e-05	0.000918581	6.68059e-05
8400	Fromage de tête		173	67.7	14.1	0.2	0	0	0	12.9	4.37	6.2	1.44	0	0	0.17	754	9	80	69	13.1	0.02	1.23	0.11	1.24	7.4	2.1	0.192627	4.17636	0.0156997	0.000222691	0	0	0	0.0143635	0.00486579	0.00690341	0.00160337	0	0	0.000189287	0.839543	0.0100211	0.0890762	0.0768282	0.0145862	2.22691e-05	0.00136955	0.00012248
8450	Museau de boeuf		151	66.1	26.2	0	0	0	0	5.17	2	2.33	0.56	7	0	0.41	806	13.8	149	209	20.2	0.05	1.1	0.08	1.5	10	12	0.265296	4.07766	0.0460315	0	0	0	0	0.00908332	0.00351386	0.00409364	0.00098388	0.0122985	0	0.000720341	1.41608	0.0242456	0.261782	0.367198	0.03549	8.78464e-05	0.00193262	0.000140554
8500	Andouille		211	60.5	18.4	0.3	0.24	0.061	0	15.1	5.83	6.79	1.64	7	0	0.41	820	13.8	149	209	20.2	0.05	1.1	0.08	1.5	10	2	0.0959061	3.7322	0.00836337	0.000136359	0.000109087	2.77264e-05	0	0.00686342	0.00264992	0.00308627	0.000745431	0.00318172	0	0.000186358	0.372716	0.00627253	0.0677252	0.094997	0.00918153	2.27266e-05	0.000499984	3.63625e-05
8501	Andouille de Guéméné		234	60.5	18	0	0	0	0	18	6.95	8.1	1.96	7	0	0.41	806	13.8	149	209	20.2	0.05	1.1	0.08	1.5	10	12	0.0120421	3.7322	0.000926317	0	0	0	0	0.000926317	0.000357661	0.000416843	0.000100866	0.000360234	0	2.10994e-05	0.0414784	0.000710176	0.00766785	0.0107556	0.00103953	2.5731e-06	5.66083e-05	4.11696e-06
8512	Andouille de Vire		238	60.5	19	0	0	0	0	18	6.95	8.1	1.96	7	0	0.41	806	13.8	149	209	20.2	0.05	1.1	0.08	1.5	10	12	0.0327193	3.7322	0.00261204	0	0	0	0	0.00247457	0.000955458	0.00111356	0.000269453	0.000962332	0	5.63651e-05	0.110806	0.00189717	0.0204839	0.0287325	0.00277701	6.8738e-06	0.000151224	1.09981e-05
8550	Andouillette, crue		303	48.7	24.5	1	0.1	0.5	0.5	22.3	11.1	8.37	2.85	52	15	0.41	1090	9.6	98.3	64	35.6	0.05	2.3	0.2	4.3	19	15	1.64859	3.00427	0.133302	0.0054409	0.00054409	0.00272045	0.00272045	0.121332	0.060394	0.0455403	0.0155066	0.282927	0.0816135	0.00223077	5.93058	0.0522326	0.53484	0.348218	0.193696	0.000272045	0.0125141	0.00108818
8704	Boudin noir, sauté/poêlé		246	61.8	11.9	3.78	2.86	0.5	0	20.3	7.46	9.13	2.72	7	40	0.13	525	8.5	27.2	155	27.2	0.05	22.8	0.05	0.7	11	40	1.43131	3.8124	0.0692383	0.0219933	0.0166405	0.00290917	0	0.118112	0.0434049	0.0531215	0.0158259	0.0407284	0.232734	0.000756385	3.05463	0.0494559	0.158259	0.901844	0.158259	0.000290917	0.132658	0.000290917
8800	Boudin blanc, sauté/poêlé		224	60.1	9.89	4.6	2	0.19	6.08	17.1	6.6	8.56	1.86	14	0	0.46	655	10.9	134	160	43.8	0.05	0.45	0.05	0.9	2.5	35.1	0.418335	3.70752	0.0184702	0.00859081	0.00373513	0.000354838	0.0113548	0.0319354	0.0123259	0.0159864	0.00347368	0.0261459	0	0.000859081	1.22326	0.0203565	0.250254	0.298811	0.0817994	9.33784e-05	0.000840405	9.33784e-05
9001	Épeautre, cru		340	11	14.6	59.5	6.68	52.8	10.7	2.43	0.41	0.45	1.26	0	5	0.79	8	136	401	388	27	2.98	4.44	0.51	3.28	12.8	0	0.00572327	0.678582	0.000245764	0.00100157	0.000112445	0.000888791	0.000180115	4.09046e-05	6.90159e-06	7.57492e-06	2.12098e-05	0	8.41658e-05	1.32982e-05	0.000134665	0.00228931	0.0067501	0.00653126	0.000454495	5.01628e-05	7.47392e-05	8.58491e-06
9010	Blé tendre entier ou froment, cru		147	61.9	5.54	27.4	0	25	3.8	0.9	0.23	0.25	0.33	0	2.5	0.04	2.5	28	96	99	21	0.8	0.78	0.17	0.71	10	10	0.333744	3.81856	0.0125778	0.0622081	0	0.0567592	0.0086274	0.00204333	0.000522185	0.000567592	0.000749221	0	0.00567592	9.08147e-05	0.00567592	0.0635703	0.217955	0.224766	0.0476777	0.00181629	0.00177089	0.000385963
9081	Blé dur précuit, grains entiers, cuit, non salé		147	61.9	5.54	27.4	0	25	3.8	0.9	0.23	0.25	0.33	0	2.5	0.04	2.5	28	96	99	21	0.8	0.78	0.17	0.71	10	10	0.90625	3.81856	0.0341539	0.16892	0	0.154124	0.0234269	0.00554847	0.00141794	0.00154124	0.00203444	0	0.0154124	0.000246599	0.0154124	0.172619	0.591837	0.610332	0.129464	0.00493197	0.00480867	0.00104804
9082	Blé dur précuit cuisiné, en sachet micro-ondable		186	57	4.93	29.5	2.21	17.9	2.58	4.84	1.11	1.61	0.92	0	107	8.99	463	16.2	82.9	124	33.6	0.2	0.57	0.1	0.7	10	8.67	0.144423	3.51629	0.003828	0.0229059	0.001716	0.0138988	0.00200329	0.00375811	0.000861881	0.00125012	0.000714352	0	0.0830822	0.00698046	0.359505	0.0125788	0.0643693	0.0962822	0.0260894	0.000155294	0.000442588	7.7647e-05
9085	Nouilles asiatiques cuites, aromatisées		146	67.5	4.78	18.8	2	16.8	6.3	4.3	0.5	1.26	2.35	10.5	107	0.88	470	16.2	82.9	124	33.6	0.2	0.57	0.1	0.7	10	8.67	0.513836	4.16402	0.0168229	0.0661652	0.00703886	0.0591264	0.0221724	0.0151335	0.00175971	0.00443448	0.00827066	0.036954	0.376579	0.0030971	1.65413	0.0570147	0.291761	0.436409	0.118253	0.000703886	0.00200607	0.000351943
9086	Nouilles asiatiques cuites, nature, non salées		164	66.9	3.5	21.4	0.6	19.8	1	6.9	3.16	2.67	0.77	0	5	0.04	93.6	9.1	43	26	11	0.24	0.32	0.04	0.19	25	10	1.54053	4.12701	0.0328771	0.20102	0.00563608	0.185991	0.00939346	0.0648149	0.0296833	0.0250805	0.00723297	0	0.0469673	0.000375739	0.879228	0.0854805	0.403919	0.24423	0.103328	0.00225443	0.00300591	0.000375739
9100	Riz blanc, cru		127	67.8	2.86	28.3	0.1	26.4	0.8	0.13	0.023	0.024	0.062	0	2.5	0.04	2.5	7.2	29	11	10	0.26	0.07	0.07	0.44	10	10	0.501482	4.18253	0.0112932	0.111748	0.000394868	0.104245	0.00315894	0.000513328	9.08196e-05	9.47683e-05	0.000244818	0	0.00987169	0.000157947	0.00987169	0.0284305	0.114512	0.0434355	0.0394868	0.00102666	0.000276407	0.000276407
9103	Riz complet, cuit, non salé		157	60.4	3.21	32.6	0.1	30.4	2.3	1	0.17	0.31	0.31	0	2.5	0.08	2.5	49	120	43	13	1.1	0.32	0.1	0.62	10	10	1.01496	3.72603	0.0207518	0.21075	0.000646474	0.196528	0.0148689	0.00646474	0.00109901	0.00200407	0.00200407	0	0.0161618	0.000517179	0.0161618	0.316772	0.775769	0.277984	0.0840416	0.00711121	0.00206872	0.000646474
9104	Riz blanc, cuit, non salé		127	67.8	2.86	28.3	0.1	26.4	0.8	0.13	0.023	0.024	0.062	0	2.5	0.04	2.5	7.2	29	11	10	0.26	0.07	0.07	0.44	10	10	29.716	4.18253	0.669194	6.62175	0.0233984	6.17718	0.187187	0.0304179	0.00538163	0.00561562	0.014507	0	0.58496	0.00935936	0.58496	1.68469	6.78554	2.57382	2.33984	0.0608359	0.0163789	0.0163789
9111	Riz sauvage, cuit, non salé		101	73.9	3.8	19.7	0.73	19	1.8	0.34	0.049	0.05	0.21	0	2	0.24	3	32	82	101	3	0.28	0.6	0.12	1.34	10	10	0.0349378	4.55884	0.00131449	0.00681461	0.000252521	0.00657246	0.000622654	0.000117612	1.695e-05	1.7296e-05	7.2643e-05	0	0.000691838	8.30206e-05	0.00103776	0.0110694	0.0283654	0.0349378	0.00103776	9.68573e-05	0.000207551	4.15103e-05
9121	Riz, mélange de variétés (blanc, complet, rouge, sauvage, etc.), cru		353	12.2	7.14	78.1	0.5	52.8	1.5	1	0.2	0.23	0.53	0	6.5	1.7	10	136	401	388	40	2.03	4.44	0.51	3.1	12.8	0	0.471698	0.752609	0.00954086	0.104362	0.000668128	0.0705543	0.00200438	0.00133626	0.000267251	0.000307339	0.000708215	0	0.00868566	0.00227163	0.0133626	0.181731	0.535838	0.518467	0.0534502	0.0027126	0.00593297	0.00068149
9311	Flocon d'avoine		364	10.1	13.3	57.9	0.97	56.9	10.2	6.51	1.13	2.08	2.5	0	0	0.59	5.68	148	422	377	84.3	4.72	4.05	0.3	3.33	3.05	0.5	1.9096	0.623061	0.0697737	0.303752	0.00508876	0.298506	0.0535107	0.0341524	0.00592814	0.010912	0.0131154	0	0	0.00309522	0.0297981	0.776429	2.21387	1.9778	0.44225	0.0247618	0.0212469	0.00157384
9320	Orge entière, crue		118	68.8	2.26	24.4	0.28	24.1	3.8	0.44	0.093	0.057	0.21	0	5	0.01	3	22	54	93	11	0.26	1.33	0.11	0.82	10	0.5	0.19776	4.24422	0.0037876	0.0408927	0.00046926	0.0403899	0.00636853	0.000737409	0.000155861	9.5528e-05	0.000351945	0	0.00837965	1.67593e-05	0.00502779	0.0368704	0.0905002	0.155861	0.0184352	0.000435742	0.00222899	0.000184352
9322	Orge perlée, bouilli/cuite à l'eau, non salée		118	68.8	2.26	24.4	0.28	24.1	3.8	0.44	0.093	0.057	0.21	0	5	0.01	3	22	54	93	11	0.26	1.33	0.11	0.82	10	0.5	0.00899897	4.24422	0.000172353	0.0018608	2.13535e-05	0.00183793	0.000289797	3.35555e-05	7.09241e-06	4.34696e-06	1.60151e-05	0	0.000381312	7.62625e-07	0.000228787	0.00167777	0.00411817	0.00709241	0.000838887	1.98282e-05	0.000101429	8.38887e-06
9331	Mil, cuit, non salé		115	71.4	3.51	22.4	0.13	22.3	1.3	1	0.17	0.18	0.51	0	2	0.02	2	44	100	62	3	0.27	0.63	0.16	0.91	10	10	0.00988567	4.40461	0.000301728	0.00192556	1.11751e-05	0.00191696	0.000111751	8.59623e-05	1.46136e-05	1.54732e-05	4.38408e-05	0	0.000171925	1.71925e-06	0.000171925	0.00378234	0.00859623	0.00532966	0.000257887	2.32098e-05	5.41563e-05	1.3754e-05
9340	Quinoa, cru		354	13.3	13.2	58.1	1.6	52.2	7	6.07	0.71	1.61	3.29	0	8	2.44	5	197	457	563	47	2.03	4.57	0.59	3.1	12.8	0	0.00232033	0.820467	8.6521e-05	0.000380823	1.04874e-05	0.000342151	4.58823e-05	3.97865e-05	4.65378e-06	1.05529e-05	2.15647e-05	0	5.24369e-05	1.59933e-05	3.27731e-05	0.00129126	0.00299546	0.00369025	0.000308067	1.33059e-05	2.99546e-05	3.86722e-06
9341	Quinoa, bouilli/cuit à l'eau, non salé		148	61.6	4.66	27.9	0.87	24.3	3.8	1.1	0.14	0.31	0.56	0	2.5	0.88	6	71	180	220	23	0.7	1.6	0.21	1.2	10	10	1.14424	3.80006	0.0360281	0.215705	0.00672627	0.187872	0.0293791	0.00850448	0.00108239	0.00239672	0.00432956	0	0.0193284	0.00680359	0.0463881	0.548926	1.39164	1.7009	0.177821	0.00541194	0.0123702	0.00162358
9390	Seigle entier, cru		147	61.9	5.54	27.4	0	25	3.8	0.9	0.23	0.25	0.33	0	2.5	0.04	2.5	28	96	99	21	0.8	0.78	0.17	0.71	10	10	0.00617887	3.81856	0.000232864	0.00115171	0	0.00105083	0.000159726	3.78298e-05	9.66763e-06	1.05083e-05	1.38709e-05	0	0.000105083	1.68133e-06	0.000105083	0.00117693	0.00403518	0.00416128	0.000882696	3.36265e-05	3.27859e-05	7.14564e-06
9410	Farine de blé tendre ou froment T110		340	12.4	9.61	68.6	1.6	59.3	6.8	1.5	0.27	0.28	0.88	0	5	0.79	2.5	73	220	280	27	2.2	2.2	0.28	1.9	10	10	3.15824	0.764947	0.0892669	0.637222	0.0148623	0.550835	0.0631649	0.0139334	0.00250802	0.00260091	0.00817428	0	0.0464448	0.00733827	0.0232224	0.678094	2.04357	2.60091	0.250802	0.0204357	0.0204357	0.00260091
9415	Farine de blé tendre ou froment T150		339	10.7	11.4	64.9	1.77	56.9	10.2	1.52	0.22	0.17	0.68	0	0.5	1.04	14	85.1	323	407	31.9	2.7	2.7	0.35	2.5	6.8	2.4	3.30255	0.660075	0.111059	0.632259	0.0172434	0.554322	0.0993688	0.0148079	0.00214325	0.00165615	0.00662459	0	0.00487102	0.0101317	0.136389	0.829048	3.14668	3.96501	0.310771	0.0263035	0.0263035	0.00340971
9440	Farine de blé tendre ou froment T45 (pour pâtisserie)		352	11.3	9.06	75.9	0.41	69.3	2.5	0.82	0.13	0.084	0.33	0	0.5	0.43	39	25	117	155	17.4	0.51	1.18	0.13	0.76	2.76	2.5	317	0.697088	8.15916	68.3532	0.369233	62.4094	2.25142	0.738467	0.117074	0.0756478	0.297188	0	0.450285	0.387245	35.1222	22.5142	105.367	139.588	15.6699	0.45929	1.06267	0.117074
9480	Farine d'épeautre (grand épeautre)		347	10.8	11.4	64	1.3	62.2	9.3	3	0.5	0.69	1.59	0	0.5	0.63	2.5	92	340	360	31	2.5	3	0.42	2.8	10	10	2.48653	0.666244	0.08169	0.458611	0.00931553	0.445712	0.0666419	0.0214974	0.0035829	0.0049444	0.0113936	0	0.0035829	0.00451445	0.0179145	0.659253	2.43637	2.57968	0.22214	0.0179145	0.0214974	0.00300963
9510	Amidon de maïs ou fécule de maïs		362	9.26	0.43	89.2	0	87	0.8	0.25	0.009	0.016	0.025	0	0	0	10.2	3.5	56	4	6	0.53	0.38	0.05	0.28	2.8	0.6	4.92915	0.571242	0.00585506	1.21459	0	1.18463	0.0108931	0.00340411	0.000122548	0.000217863	0.000340411	0	0	0	0.138888	0.0476575	0.76252	0.0544657	0.0816986	0.00721671	0.00517424	0.000680821
9520	Farine de riz		355	11.4	7.62	73.9	0.9	70	3.3	2.5	0.46	0.97	0.92	0	0	0.66	2.5	110	300	270	9.5	2.3	0.79	0.18	1.4	10	10	0.103878	0.703257	0.00222973	0.0216243	0.000263354	0.0204831	0.00096563	0.000731538	0.000134603	0.000283837	0.000269206	0	0	0.000193126	0.000731538	0.0321877	0.0877845	0.0790061	0.00277984	0.000673015	0.000231166	5.26707e-05
9533	Farine de seigle T130		352	11.3	9.06	75.9	0.41	69.3	2.5	0.82	0.13	0.084	0.33	0	0.5	0.43	39	25	117	155	17.4	0.51	1.18	0.13	0.76	2.76	2.5	3.83471	0.697088	0.0987001	0.826859	0.00446656	0.754958	0.0272351	0.00893313	0.00141623	0.000915101	0.00359504	0	0.00544703	0.00468444	0.424868	0.272351	1.2746	1.68858	0.189557	0.00555597	0.012855	0.00141623
9540	Farine de sarrasin		348	12.1	11.5	68.4	0.03	68.4	4.2	2.19	0.33	0.48	0.66	0	0	0.32	16.8	157	264	389	23.8	1.3	2.5	0.5	2.3	4.9	2.4	1.94355	0.74644	0.0642264	0.382007	0.000167547	0.382007	0.0234566	0.0122309	0.00184302	0.00268075	0.00368604	0	0	0.00178717	0.0938263	0.87683	1.47441	2.17253	0.132921	0.00726037	0.0139623	0.00279245
9550	Farine d'orge		352	11.3	9.06	75.9	0.41	69.3	2.5	0.82	0.13	0.084	0.33	0	0.5	0.43	39	25	117	155	17.4	0.51	1.18	0.13	0.76	2.76	2.5	3.06124	0.697088	0.0787921	0.66008	0.00356565	0.602681	0.0217418	0.00713129	0.00113057	0.000730523	0.00286991	0	0.00434835	0.00373958	0.339171	0.217418	1.01751	1.34799	0.151323	0.00443532	0.0102621	0.00113057
9555	Farine de millet		352	11.3	9.06	75.9	0.41	69.3	2.5	0.82	0.13	0.084	0.33	0	0.5	0.43	39	25	117	155	17.4	0.51	1.18	0.13	0.76	2.76	2.5	0.0076047	0.697088	0.000195735	0.00163976	8.85774e-06	0.00149717	5.40106e-05	1.77155e-05	2.80855e-06	1.81476e-06	7.1294e-06	0	1.08021e-05	9.28983e-06	0.000842566	0.000540106	0.0025277	0.00334866	0.000375914	1.10182e-05	2.5493e-05	2.80855e-06
9615	Polenta ou semoule de maïs, cuite, non salée		77.5	79.9	1.38	16.9	0.1	15.3	1.6	0.15	0.005	0.005	0.005	0	5.29	0.04	2.5	4	15	24	4.7	0.03	0.21	0.07	0.11	10	10	0.249211	4.92897	0.00443756	0.054344	0.000321562	0.049199	0.00514499	0.000482343	1.60781e-05	1.60781e-05	1.60781e-05	0	0.0170106	0.000128625	0.00803905	0.0128625	0.0482343	0.0771749	0.0151134	9.64686e-05	0.00067528	0.000225093
9621	Son de blé		279	9.05	15.4	23.6	2.46	20.9	42	4.35	0.84	0.67	2.49	0	6	1.55	13.3	546	1030	1260	73.9	13.3	14.8	1.05	7.49	6.8	2.4	0.222798	0.558288	0.0122978	0.018846	0.00196445	0.0166899	0.0335394	0.00347373	0.000670789	0.000535034	0.00198841	0	0.00479135	0.00123777	0.0106208	0.436013	0.822515	1.00618	0.0590135	0.0106208	0.0118187	0.000838486
9640	Son d'avoine		359	7.53	15.8	51	2.23	48.8	16.7	6.48	1.16	2.38	2.77	0	0	1.01	6.5	235	627	566	62.6	5.63	5.41	0.4	3.11	45.2	2.4	0.0523794	0.46452	0.00230528	0.00744108	0.000325365	0.0071201	0.00243659	0.000945455	0.000169248	0.000347251	0.000404153	0	0	0.000147363	0.000948373	0.0342873	0.0914816	0.0825814	0.00913357	0.000821437	0.000789338	5.83614e-05
9643	Son de riz		352	11.3	9.06	75.9	0.41	69.3	2.5	0.82	0.13	0.084	0.33	0	0.5	0.43	39	25	117	155	17.4	0.51	1.18	0.13	0.76	2.76	2.5	0.455746	0.697088	0.0117303	0.0982703	0.000530841	0.089725	0.00323683	0.00106168	0.000168315	0.000108758	0.000427262	0	0.000647367	0.000556735	0.0504946	0.0323683	0.151484	0.200684	0.0225284	0.000660314	0.00152779	0.000168315
9660	Germe de blé		368	7.5	27.2	35.1	10	17.8	16.3	9.5	1.83	1.52	5.72	0	22.4	10.2	7.2	250	1000	990	54	17	8.9	0.78	14	10	10	0.0909095	0.462669	0.0067194	0.00867098	0.00247037	0.00439725	0.0040267	0.00234685	0.000452077	0.000375496	0.00141305	0	0.00553362	0.00251977	0.00177866	0.0617592	0.247037	0.244566	0.01334	0.00419962	0.00219863	0.000192689
9683	Couscous (semoule de blé dur roulée précuite à la vapeur), cuite, non salée		156	60.6	4.56	31	1.6	26.1	2.3	1	0.25	0.25	0.42	0	13.7	0.04	2.5	19	73	110	15	0.31	0.53	0.16	0.57	10	10	10.2204	3.73837	0.298751	2.03098	0.104825	1.70995	0.150686	0.0655155	0.0163789	0.0163789	0.0275165	0	0.897563	0.00262062	0.163789	1.24479	4.78263	7.20671	0.982733	0.0203098	0.0347232	0.0104825
9691	Boulgour de blé, cuit, non salé		110	71.5	3.73	21.7	0	18.4	2.2	0.5	0.11	0.07	0.24	0	2.5	0.04	7	22	66	95	14	0.46	0.55	0.16	0.73	10	10	0.310946	4.41078	0.0105439	0.0613412	0	0.0520128	0.00621892	0.00141339	0.000310946	0.000197875	0.000678428	0	0.00706696	0.000113071	0.0197875	0.0621892	0.186568	0.268544	0.0395749	0.00130032	0.00155473	0.000452285
9811	Pâtes sèches standard, cuites, non salées		125	68.3	3.99	25	0.6	21.7	1.9	0.55	0.11	0.087	0.2	0	2.5	0.04	2.5	17	59	34	17	0.31	0.43	0.12	0.47	10	10	47.9822	4.21338	1.53159	9.59643	0.230314	8.3297	0.729329	0.211121	0.0422243	0.0333956	0.0767714	0	0.959643	0.0153543	0.959643	6.52557	22.6476	13.0511	6.52557	0.118996	0.165059	0.0460629
9824	Pâtes sèches, sans gluten, cuites, non salées		162	60.1	3.09	34.4	0.49	34	1	1.1	0.29	0.33	0.38	0	2.5	0.04	5.9	23	62	32	9.6	0.34	0.48	0.07	0.46	10	10	0.0091539	3.70752	0.000174602	0.00194379	2.76877e-05	0.00192119	5.65056e-05	6.21561e-05	1.63866e-05	1.86468e-05	2.14721e-05	0	0.000141264	2.26022e-06	0.000333383	0.00129963	0.00350335	0.00180818	0.000542454	1.92119e-05	2.71227e-05	3.95539e-06
9871	Pâtes sèches, au blé complet, cuites, non salées		127	67.5	4.55	23.4	0.6	21.6	3.3	0.9	0.099	0.075	0.21	0	2.5	0.04	2.5	36	110	65	22	0.76	0.98	0.19	0.99	10	10	0.875291	4.16402	0.0313588	0.161274	0.00413523	0.148868	0.0227438	0.00620285	0.000682313	0.000516904	0.00144733	0	0.0172301	0.000275682	0.0172301	0.248114	0.758126	0.447983	0.151625	0.00523796	0.00675421	0.00130949
9901	Vermicelle de riz, cuite, non salée		89.1	77.8	1.43	20.1	0.1	19.3	0.25	0.25	0.005	0.005	0.005	0	0	0.03	9.5	1.3	13	2.2	5.2	0.05	0.08	0.03	0.15	10	10	0.796337	4.79942	0.0127807	0.179645	0.000893757	0.172495	0.00223439	0.00223439	4.46878e-05	4.46878e-05	4.46878e-05	0	0	0.000268127	0.0849069	0.0116188	0.116188	0.0196627	0.0464754	0.000446878	0.000715006	0.000268127
9903	Vermicelle de soja, cuite, non salée		61.1	84.4	0.29	14.4	0	14.4	0.8	0.1	0.019	0.02	0.025	0	25	0.05	2.5	2.9	10	1.2	14.2	0.5	0.5	0.11	0.5	2.5	5	0.0135166	5.20657	6.41541e-05	0.00318558	0	0.00318558	0.000176977	2.21221e-05	4.2032e-06	4.42442e-06	5.53053e-06	0	0.00553053	1.10611e-05	0.000553053	0.000641541	0.00221221	0.000265465	0.00314134	0.000110611	0.000110611	2.43343e-05
10003	Coquille Saint-Jacques, noix et corail, crue		83	79.3	17	0.78	0.5	0	0	1.31	0.19	0.096	0.38	2	0	0	191	51.4	225	388	220	2.4	1.16	0.045	2.91	21.4	42.6	0.0109446	4.89196	0.00224166	0.000102853	6.59312e-05	0	0	0.00017274	2.50539e-05	1.26588e-05	5.01077e-05	0.000263725	0	0	0.0251857	0.00677773	0.0296691	0.0511626	0.0290097	0.00031647	0.00015296	5.93381e-06
10004	Coquille Saint-Jacques, noix et corail, cuite		110	73	20.2	3.22	0.3	0	0	1.77	0.32	0.12	0.68	2	0	0	183	62.8	357	348	17.1	1.27	1.4	0.073	2.89	61.4	20	0.33494	4.50331	0.0615072	0.00980462	0.000913474	0	0	0.0053895	0.000974372	0.00036539	0.00207054	0.00608983	0	0	0.557219	0.191221	1.08703	1.05963	0.052068	0.00386704	0.00426288	0.000222279
10005	Crabe, miettes et ou pattes décortiquées, appertisé, égoutté		111	72.4	14.8	8.72	0.6	0	0.17	1.8	0.23	0.27	0.48	0	0	2.4	638	32	220	110	120	0	3.5	0.44	11.9	31	60	0.0109564	4.4663	0.00146085	0.000860715	5.92235e-05	0	1.678e-05	0.000177671	2.27024e-05	2.66506e-05	4.73788e-05	0	0	0.000236894	0.0629744	0.00315859	0.0217153	0.0108576	0.0118447	0	0.000345471	4.34306e-05
10007	Crevette, cuite		93.8	74.9	19	1.87	0.13	0	0	1.16	0.31	0.28	0.44	1	0	2.48	541	61	57	254	240	0.077	1.98	0.68	1.69	21.5	2.5	1.18807	4.62052	0.240653	0.0236854	0.00164658	0	0	0.0146925	0.00392645	0.00354647	0.00557303	0.012666	0	0.0314116	6.85229	0.772624	0.72196	3.21716	3.03983	0.00097528	0.0250786	0.00861286
10009	Homard, bouilli/cuit à l'eau		90.9	76.5	19.6	0.11	0	0	0	1.32	0.21	0.3	0.49	1	0	1.6	361	34.2	212	208	68.8	0.19	0.63	1.3	2.96	1.1	120	0.0323353	4.71923	0.00697219	3.91296e-05	0	0	0	0.000469555	7.4702e-05	0.000106717	0.000174305	0.000355724	0	0.000569158	0.128416	0.0121658	0.0754134	0.0739905	0.0244738	6.75875e-05	0.000224106	0.000462441
10011	Huître, sans précision, crue		67.2	83.3	8.64	3.86	0	0	0	1.91	0.34	0.23	0.35	14.2	0	1.21	578	90.2	94.6	175	92.7	0.55	2.18	1.29	22.5	23.5	101	0.486283	5.13871	0.0625221	0.0279323	0	0	0	0.0138214	0.00246036	0.00166436	0.00253272	0.102756	0	0.00875599	4.18261	0.652719	0.684559	1.26636	0.67081	0.00397999	0.0157752	0.00933489
10013	Moule, bouillie/cuite à l'eau		108	74.1	17.2	5.12	0	0	0	2.09	0.37	0.29	0.72	98.4	0	2.27	322	66.6	179	166	59.4	0.19	3.99	0.11	2.85	55.7	106	0.752635	4.57117	0.119864	0.0356805	0	0	0	0.0145649	0.00257847	0.00202096	0.00501757	0.685734	0	0.0158193	2.24397	0.464125	1.24742	1.15683	0.413949	0.00132408	0.0278057	0.000766573
10014	Moule commune, crue		71.8	82.7	11.2	2.69	0	0	0	1.82	0.45	0.4	0.49	60	0	1.6	339	31	213	276	51.5	1	6.78	0.18	2.36	48.3	138	0.000608287	5.1017	9.4886e-05	2.27896e-05	0	0	0	1.5419e-05	3.81238e-06	3.38879e-06	4.15126e-06	0.000508318	0	1.35551e-05	0.002872	0.000262631	0.00180453	0.00233826	0.000436306	8.47196e-06	5.74399e-05	1.52495e-06
10016	Seiche, crue		149.08	61.12	32.48	1.64	0		0	1.4	0.236	0.162	0.268	203	0	2.4	744	60	580	637	180	0.209	10.84	0.998	3.46	89.6	21	0.0181328	3.77045	0.00395059	0.000199476	0	0	0	0.000170284	2.8705e-05	1.97043e-05	3.25972e-05	0.0246912	0	0.000291916	0.0904939	0.00729789	0.0705463	0.0774793	0.0218937	2.5421e-05	0.00131849	0.000121388
10017	Clam, Praire ou Palourde, cru		80.5	81.1	11.5	2.66	0.16	0	0	2.65	0.21	0.17	0.46	53	0	0.68	329	19	168	180	46	0.085	7.81	0.053	0.96	38	80	0.000963467	5.003	0.000137638	3.18363e-05	1.91497e-06	0	0	3.17166e-05	2.51339e-06	2.03465e-06	5.50553e-06	0.000634332	0	8.1386e-06	0.00393765	0.000227402	0.00201071	0.00215434	0.000550553	1.01733e-06	9.34743e-05	6.34332e-07
10020	Bulot ou Buccin, cuit		97.7	74.1	20.7	2.69	0	0	0	0.47	0.072	0.046	0.16	1	0	0.8	387	144	108	173	64.5	0.05	0.64	0.27	1.58	31.4	114	0.0305256	4.57117	0.00646755	0.000840469	0	0	0	0.000146848	2.24958e-05	1.43723e-05	4.99907e-05	0.000312442	0	0.000249954	0.120915	0.0449917	0.0337438	0.0540525	0.0201525	1.56221e-05	0.000199963	8.43594e-05
10022	Langouste, bouillie/cuite à l'eau		106	73.6	21.8	1.3	0	0	0	1.52	0.26	0.35	0.75	10.5	0	1.5	182	51	229	208	65.5	0.018	1.36	0.42	7.27	35.5	65	0.0672875	4.54033	0.0138384	0.000825224	0	0	0	0.000964877	0.000165045	0.000222176	0.000476091	0.00666527	0	0.000952182	0.115531	0.0323742	0.145366	0.132036	0.0415786	1.14262e-05	0.000863311	0.000266611
10025	Crabe ou Tourteau, bouilli/cuit à l'eau		124	72.3	19.5	1.79	0	0	0	4.29	0.55	1.26	1.4	26	0	2.4	478	55	302	248	53	0.087	1.62	1.99	4.42	39.6	100	1.16761	4.46013	0.183616	0.016855	0	0	0	0.0403955	0.00517891	0.0118644	0.0131827	0.244821	0	0.0225989	4.50094	0.517891	2.84369	2.33522	0.499058	0.000819209	0.0152542	0.0187382
10027	Clam, Praire ou Palourde, bouilli/cuit à l'eau		99.2	74.1	16.2	5.33	0	0	0	1.48	0.14	0.13	0.42	81	0	1	625	12.9	231	432	72.5	0.75	9.67	0.5	2.05	51.8	80	0.0396977	4.57117	0.00648289	0.00213295	0	0	0	0.000592264	5.6025e-05	5.20232e-05	0.000168075	0.0324144	0	0.000400178	0.250111	0.0051623	0.0924412	0.172877	0.0290129	0.000300134	0.00386972	0.000200089
10028	Moule, appertisée, égouttée		102	75.1	14.6	5.93	0.5	0	0	2.2	0.54	0.3	1.06	21.1	0	3.5	639	42	189	98	57	0.7	8.44	0.16	3.56	57.2	197	0.00162217	4.63286	0.000232193	9.43085e-05	7.95181e-06	0	0	3.4988e-05	8.58795e-06	4.77109e-06	1.68578e-05	0.000335566	0	5.56627e-05	0.0101624	0.000667952	0.00300578	0.00155855	0.000906506	1.11325e-05	0.000134227	2.54458e-06
10031	Écrevisse, cuite		73.5	81.6	16.3	0.56	0.13	0	0	0.7	0.17	0.16	0.23	10.5	0	1.89	85.7	26	150	140	73	0.32	0.65	0.89	1.5	25	10	0.0167959	5.03384	0.0037248	0.000127968	2.9707e-05	0	0	0.000159961	3.88476e-05	3.65624e-05	5.25585e-05	0.00239941	0	0.000431893	0.0195837	0.00594139	0.0342773	0.0319921	0.0166816	7.31248e-05	0.000148535	0.000203378
10037	Calmar ou calamar ou encornet, bouilli/cuit à l'eau		149	61.1	32.5	1.64	0	0	0	1.4	0.24	0.16	0.27	203	0	1.89	744	60	212	637	180	0.21	5.77	1	3.46	35.5	80	1.32053	3.76921	0.288036	0.0145347	0	0	0	0.0124077	0.00212704	0.00141802	0.00239291	1.79912	0	0.0167504	6.59381	0.531759	1.87888	5.64551	1.59528	0.00186116	0.0511375	0.00886265
10059	Crevette rose, crue		92.3	76.3	21.9	0	0	0	0	0.53	0.11	0.096	0.13	15	0	1.45	119	35	214	264	64	0.033	0.52	0.39	1.34	38	60	0.00562463	4.70689	0.00133455	0	0	0	0	3.22974e-05	6.70324e-06	5.8501e-06	7.92201e-06	0.000914079	0	8.83609e-05	0.00725169	0.00213285	0.0130409	0.0160878	0.00390007	2.01097e-06	3.16881e-05	2.3766e-05
10079	Poulpe, cuit		156	60.5	29.8	4.4	0	0	0	2.08	0.45	0.32	0.48	90	0	1.2	460	60	279	630	106	0.047	9.54	0.74	3.36	35.5	80	0.0361313	3.7322	0.00690201	0.00101909	0	0	0	0.000481751	0.000104225	7.41156e-05	0.000111173	0.020845	0	0.000277933	0.106541	0.0138967	0.0646195	0.145915	0.0245508	1.08857e-05	0.00220957	0.000171392
10084	Calmar ou calamar ou encornet, frit ou poêlé avec matière grasse		173	64.5	17.9	8.45	0	0	0	7.48	1.88	2.75	2.14	11	0	1.89	306	38	251	279	39	0.07	1.01	2.11	1.74	35.5	80	0.0384851	3.97896	0.00398198	0.00187976	0	0	0	0.00166398	0.000418219	0.000611757	0.000476058	0.00244703	0	0.000420444	0.0680719	0.00845337	0.0558367	0.0620655	0.00867582	1.5572e-05	0.000224682	0.000469384
10099	Escargot, sans matière grasse ajoutée, cuit		80	78.8	16.6	0.23	0.15	0	0	1.4	0.31	0.24	0.75	10.5	0	1.89	109	53	212	251	67.2	0.074	1.38	0.71	2.45	35.5	80	0.0584801	4.86111	0.0121346	0.00016813	0.00010965	0	0	0.0010234	0.00022661	0.00017544	0.000548251	0.00767551	0	0.00138159	0.0796792	0.0387431	0.154972	0.183481	0.0491233	5.40941e-05	0.00100878	0.000519011
11000	Ail, cru		130	63.5	6	22	1	0.18	5.8	0.4	0.2	0.04	0.1	0	5.6	0.39	2.5	22	150	580	12	0.23	0.77	0.17	0.96	10	10	2.03141	3.91727	0.0937574	0.343777	0.0156262	0.00281272	0.0906322	0.00625049	0.00312525	0.000625049	0.00156262	0	0.0875069	0.00609423	0.0390656	0.343777	2.34394	9.06322	0.187515	0.00359403	0.0120322	0.00265646
11001	Bouillon de boeuf, déshydraté		240	2.6	10.2	19.7	3.95	0	0.65	13.3	7.03	2.6	1.4	0	0	2.17	13200	21.9	127	344	32.7	0.1	0.35	0.12	0.32	4.6	2.5	0.257847	0.160392	0.0109585	0.0211649	0.00424373	0	0.000698335	0.014289	0.00755276	0.00279334	0.00150411	0	0	0.00233137	14.1816	0.0235285	0.136444	0.36958	0.0351316	0.000107436	0.000376027	0.000128923
11002	Cerfeuil, frais		39.9	87.4	3.72	3.63	0.6	0.18	2.55	0.6	0.22	0.0097	0.25	0	0	2.9	10	34	40.6	597	273	1.7	1.6	0.073	1.1	0.1	2.8	0.0013433	5.39164	0.00012524	0.00012221	2.01999e-05	6.05998e-06	8.58497e-05	2.01999e-05	7.40664e-06	3.26565e-07	8.41664e-06	0	0	9.7633e-05	0.000336665	0.00114466	0.00136686	0.0200989	0.00919097	5.72331e-05	5.38665e-05	2.45766e-06
11003	Ciboule ou Ciboulette, fraîche		29.7	90.6	2.57	2.1	1.75	0	3.19	0.52	0.15	0.042	0.2	0	1610	0.99	11.5	23.8	46.3	275	92.8	0.85	1.31	0.1	0.45	0.35	2.2	0.0569422	5.58905	0.00492732	0.00402621	0.00335518	0	0.00611601	0.000996967	0.000287587	8.05243e-05	0.000383449	0	3.08676	0.00189807	0.0220483	0.0456304	0.0887684	0.527242	0.17792	0.00162966	0.00251159	0.000191724
11004	Cornichon, au vinaigre		19.4	93.7	1.06	0.78	0.6	0.18	1.5	0.3	0.005	0.005	0.005	0	369	0.48	689	23	26	120	65	0.06	0.25	0.05	0.13	10	10	0.226466	5.78028	0.0123739	0.00910535	0.00700412	0.00210124	0.0175103	0.00350206	5.83676e-05	5.83676e-05	5.83676e-05	0	4.30753	0.00560329	8.04306	0.268491	0.303512	1.40082	0.758779	0.000700412	0.00291838	0.000583676
11005	Curry, poudre		301	8.8	14.5	2.63	2.63	0	53.2	14	1.65	8.78	3.06	0	11	25.2	52	255	367	1170	525	8.3	19.1	1.2	4.7	3.1	0.5	0.0965456	0.542865	0.00465087	0.000843572	0.000843572	0	0.0170639	0.00449049	0.000529237	0.00281618	0.000981494	0	0.00352825	0.00808289	0.016679	0.0817912	0.117715	0.375277	0.168394	0.00266222	0.00612632	0.0003849
11006	Gingembre, poudre		335	9.94	8.98	58.3	3.39	54.9	14.1	4.24	2.6	0.48	0.93	0	18	0	27	214	168	1320	114	33.3	19.8	0.48	3.64	3.1	10	0.053002	0.613191	0.00142077	0.00922393	0.000536349	0.008686	0.00223083	0.000670831	0.000411359	7.59432e-05	0.00014714	0	0.00284787	0	0.0042718	0.033858	0.0265801	0.208844	0.0180365	0.00526856	0.00313266	7.59432e-05
11007	Gélatine, sèche		348	11.7	86.9	0	0	0	0	0.1	0.036	0.041	0.023	0	3.57	0	298	11	0	12	280	0.3	1.2	0.15	1.2	10	5	0.205229	0.721764	0.0512483	0	0	0	0	5.89739e-05	2.12306e-05	2.41793e-05	1.3564e-05	0	0.00210537	0	0.175742	0.00648713	0	0.00707687	0.165127	0.000176922	0.000707687	8.84609e-05
11009	Levure alimentaire		334	5	40.4	21.8	2.5	3.7	22.5	4.5	0.7	2.1	0.01	10.5	2.5	0.098	141	150	1100	1700	130	0.89	4.1	0.39	8.4	10	10	8.16499	0.308446	0.987621	0.532924	0.0611152	0.0904505	0.550037	0.110007	0.0171122	0.0513367	0.000244461	0.256684	0.0611152	0.00239571	3.4469	3.66691	26.8907	41.5583	3.17799	0.021757	0.100229	0.00953397
11013	Moutarde		152	67.9	6.92	4.33	1.66	2.6	0.5	11.2	0.76	4.11	2.3	0	51	0.36	1860	48.3	130	150	86.3	0.39	1.83	0.082	0.67	6	3	2.65436	4.1887	0.120843	0.0756142	0.0289884	0.0454035	0.00873144	0.195584	0.0132718	0.0717724	0.0401646	0	0.890606	0.00628663	32.4809	0.843457	2.27017	2.61943	1.50705	0.00681052	0.0319571	0.00143196
11014	Persil, frais		43	85.5	3.71	3.48	0.95	0.36	4.3	0.63	0.1	0.11	0.29	1	5050	1.73	54.3	39.5	65	598	218	1.7	4.67	0.12	0.77	0.1	2.5	0.259069	5.27443	0.0223522	0.0209665	0.00572361	0.00216895	0.0259069	0.00379566	0.000602485	0.000662734	0.00174721	0.00602485	30.4255	0.010423	0.327149	0.237982	0.391615	3.60286	1.31342	0.0102422	0.0281361	0.000722982
11015	Poivre noir, poudre		330	9	13.3	39.5	0.64	10.6	25.7	7.5	2.9	2.06	2.17	0	608	1.93	14.2	190	170	1600	480	15	17	1	0.99	10	10	0.860268	0.555203	0.0346714	0.102972	0.0016684	0.0276329	0.0669967	0.0195516	0.00755993	0.00537016	0.00565692	0	1.58498	0.00503127	0.0370176	0.495306	0.443169	4.171	1.2513	0.0391031	0.0443169	0.00260687
11016	Raifort, cru		104	69.3	7.5	13	1.1	0.18	7.5	0.7	0.11	0.067	0.38	0	11	0	6	25	80.5	587	93.7	0.46	1.3	0.23	1.4	0.2	0.9	0.00221602	4.27506	0.000159809	0.000277003	2.34387e-05	3.83542e-06	0.000159809	1.49155e-05	2.34387e-06	1.42763e-06	8.09701e-06	0	0.000234387	0	0.000127847	0.000532698	0.00171529	0.0125077	0.00199655	9.80164e-06	2.77003e-05	4.90082e-06
11017	Sel blanc alimentaire, non iodé, non fluoré (marin, ignigène ou gemme)		0	0.027	0	0	0	0	0	0	0	0	0	0	0	0	39100	3.15	8	16.9	13.3	0.12	0.29	0.15	0.088	0.5	1.8	0	0.00166561	0	0	0	0	0	0	0	0	0	0	0	0	875.49	0.0705318	0.179128	0.378409	0.297801	0.00268693	0.00649341	0.00335866
11018	Vinaigre		22.6	92.9	0.04	0.62	0.04	0	0	0.1	0	0	0	0	0	0	13.1	12.3	19	54.8	9	0.15	0.37	0.0075	0.015	0.1	2.5	0.518197	5.73093	0.000917162	0.014216	0.000917162	0	0	0.00229291	0	0	0	0	0	0	0.300371	0.282027	0.435652	1.25651	0.206362	0.00343936	0.00848375	0.000171968
11019	Poivre blanc, poudre		310	11.4	11.4	48.3	3.1	0	26.2	2.11	0.63	0.79	0.62	0	81	2.32	5	90	176	73	265	4.3	14.3	0.91	1.13	3	10	0.0728713	0.703257	0.00267978	0.0113538	0.000728713	0	0.0061588	0.000495995	0.000148093	0.000185704	0.000145743	0	0.0190406	0.000545359	0.00117534	0.0211562	0.0413721	0.01716	0.0622932	0.00101079	0.00336148	0.000213912
11020	Poivre gris, poudre		283	12.5	12.1	38.7	0.64	19.1	25.3	3.26	1.39	0.74	1	0	310	1.04	20	171	158	1330	443	12.8	9.71	1.33	1.19	3.05	0.75	0.194426	0.771116	0.00831289	0.0265875	0.00043969	0.013122	0.0173815	0.00223967	0.000954952	0.000508392	0.000687016	0	0.212975	0.000714497	0.0137403	0.11748	0.108549	0.913731	0.304348	0.00879381	0.00667093	0.000913731
11021	Moutarde à l'ancienne		142	67.8	6.6	2.2	2.2	0	4.5	9.9	0.61	5.34	3.47	10.5	29.3	1.18	1960	95	210	200	110	0.57	1.7	0.16	1.1	70	10	0.135613	4.18253	0.00630314	0.00210105	0.00210105	0	0.00429759	0.0094547	0.000582563	0.00509981	0.00331392	0.0100277	0.0279821	0.00112692	1.87184	0.0907269	0.200554	0.191004	0.105052	0.000544362	0.00162353	0.000152803
11023	Ail séché, poudre		344	6.48	16.7	62.8	2.43	2	9.45	0.77	0.2	0.067	0.29	0	0	0.67	43	67.5	416	1150	79.5	0.98	4.2	0.53	2.81	4.4	15	0.135001	0.399746	0.00655383	0.0246455	0.000953641	0.000784889	0.0037086	0.000302182	7.84889e-05	2.62938e-05	0.000113809	0	0	0.000262938	0.0168751	0.02649	0.163257	0.451311	0.0311994	0.000384596	0.00164827	0.000207996
11024	Persil, séché		291	3.95	29	16.8	7.27	2	29.7	5.34	1.38	0.76	3.12	0	1150	8.96	422	386	492	4490	658	5.57	38	0.62	5.78	4.4	15	0.0282401	0.243673	0.00281431	0.00163036	0.000705518	0.00019409	0.00288224	0.000518221	0.000133922	7.37543e-05	0.000302781	0	0.111602	0.000869524	0.040953	0.0374594	0.0477462	0.435732	0.0638557	0.000540541	0.00368771	6.0168e-05
11025	Cannelle, poudre		243	10.6	3.87	27.5	2.17	10.6	53.1	1.22	0.44	0.31	0.077	0	112	2.32	10	60	64	431	1000	17.5	8.32	0.34	1.83	3.1	10	0.031248	0.653906	0.000497654	0.0035363	0.000279046	0.00136308	0.00682827	0.000156883	5.65808e-05	3.98637e-05	9.90164e-06	0	0.0144024	0.000298335	0.00128593	0.00771556	0.00822993	0.0554235	0.128593	0.00225037	0.00106989	4.37215e-05
11026	Coriandre, graine		346	8.88	12.4	13	2.95	10	41.9	17.8	0.97	13.6	1.76	0	81	2.32	35	330	409	1270	709	1.9	16.3	0.98	4.7	3.1	10	0.0369327	0.5478	0.0013236	0.00138765	0.000314889	0.00106742	0.00447249	0.00190001	0.00010354	0.00145169	0.000187866	0	0.0086461	0.000247641	0.00373597	0.0352248	0.0436575	0.135562	0.0756801	0.00020281	0.00173989	0.000104607
11027	Menthe, fraîche		57.6	82.1	3.52	5.3	5.3	0	7.4	0.84	0.22	0.029	0.45	0	740	5	30.5	71.5	66.5	514	221	1.15	8.48	0.28	1.1	0.5	3.9	0.146074	5.06469	0.00892676	0.0134409	0.0134409	0	0.0187665	0.00213025	0.000557922	7.35443e-05	0.00114121	0	1.87665	0.0126801	0.0773483	0.181325	0.168645	1.30351	0.560458	0.00291641	0.0215054	0.000710083
11029	Menthe, séchée		283	11.3	19.9	22.2	2.43	2	29.8	6.03	1.58	0.21	3.26	0	1080	7.48	344	602	276	1920	1490	11.5	87.5	1.54	2.41	4.4	15	0.0220106	0.697088	0.00154774	0.00172663	0.000188996	0.000155552	0.00231772	0.000468989	0.000122886	1.63329e-05	0.00025355	0	0.083998	0.000581764	0.0267549	0.0468211	0.0214662	0.14933	0.115886	0.000894423	0.00680539	0.000119775
11032	Basilic, séché		244	10.4	23	10.1	1.71	2	37.7	4.07	2.16	1.24	0.5	0	378	10.7	76	711	274	2630	2240	9.8	89.8	2.1	7.1	4.4	15	0.00644472	0.641568	0.000607494	0.000266769	4.51659e-05	5.28256e-05	0.000995762	0.0001075	5.70516e-05	3.27518e-05	1.32064e-05	0	0.00998403	0.000282617	0.00200737	0.0187795	0.0072371	0.0694656	0.0591646	0.000258845	0.00237187	5.54668e-05
11033	Basilic, frais		34.8	91.7	3.35	2.55	0.37	0	3.47	0.47	0.13	0.046	0.2	0	3140	0.8	12	64	56	295	273	1.15	5.24	0.39	0.81	1.6	3.9	0.0656102	5.6569	0.00631593	0.00480765	0.00069758	0	0.00654217	0.000886115	0.000245096	8.67262e-05	0.00037707	0	5.92	0.00150828	0.0226242	0.120663	0.10558	0.556179	0.514701	0.00216815	0.00987924	0.000735287
11035	Origan, séché		265	9.93	9	26.4	4.09	2	42.5	4.28	1.55	0.72	1.37	0	1010	18.3	25	270	148	1260	1600	4.99	36.8	0.63	2.69	4.4	15	0.00122693	0.612574	4.16692e-05	0.00012223	1.89363e-05	9.25982e-06	0.000196771	1.9816e-05	7.17636e-06	3.33353e-06	6.34297e-06	0	0.00467621	8.47273e-05	0.000115748	0.00125008	0.000685226	0.00583368	0.00740785	2.31032e-05	0.000170381	2.91684e-06
11036	Romarin, séché		328	9.31	4.88	21.5	2.43	2	42.6	15.2	7.37	3.01	2.34	0	1080	7.48	50	220	70	955	1280	1.87	29.3	0.55	3.23	4.4	15	0.00338843	0.574327	5.04132e-05	0.000222107	2.51033e-05	2.06611e-05	0.000440082	0.000157025	7.61363e-05	3.1095e-05	2.41735e-05	0	0.011157	7.72726e-05	0.000516528	0.00227272	0.00072314	0.00986569	0.0132231	1.93182e-05	0.000302686	5.68181e-06
11038	Thym, séché		285	7.79	9.11	26.9	1.71	2	37	7.43	2.73	0.47	1.19	0	2260	7.48	55	220	201	814	1890	7.87	124	0.86	6.18	4.4	15	0.00718611	0.480559	0.000229703	0.000678268	4.31166e-05	5.04288e-05	0.000932933	0.000187343	6.88353e-05	1.18508e-05	3.00051e-05	0	0.0569846	0.000188604	0.00138679	0.00554717	0.0050681	0.0205245	0.0476552	0.000198437	0.00312659	2.16844e-05
11039	Safran		352	11.9	11.4	61.5	42.4	19.1	3.9	5.85	1.59	0.43	2.07	0	318	1.69	148	264	252	1720	111	28.4	11.1	0.33	1.09	3.1	10	0.00274962	0.734102	8.90502e-05	0.000480402	0.000331204	0.000149198	3.04645e-05	4.56968e-05	1.24202e-05	3.35891e-06	1.61696e-05	0	0.00248403	1.32013e-05	0.00115609	0.00206222	0.00196848	0.0134356	0.000867068	0.000221844	8.67068e-05	2.57777e-06
11040	Câpres, au vinaigre		37.7	83.9	2.18	3.5	0.41	0	3.6	0.86	0.23	0.063	0.3	0	83	0.88	1620	33	10	40	40	0.078	1.67	0.37	0.32	10	10	0.00837953	5.17573	0.000484546	0.00077794	9.11302e-05	0	0.000800167	0.000191151	5.11218e-05	1.40029e-05	6.66806e-05	0	0.0184483	0.000195596	0.360075	0.00733487	0.00222269	0.00889075	0.00889075	1.7337e-05	0.000371189	8.22394e-05
11041	Bouillon de légumes, déshydraté		285	2.3	9.66	25.4	3.95	0	0.25	16	7.79	5.82	1.59	1	0	2.77	19100	27	212	557	51.1	0.2	1	0.05	0.8	2.57	2.5	0.0547621	0.141885	0.00185615	0.00488055	0.000758983	0	4.80369e-05	0.00307436	0.00149683	0.0011183	0.000305515	0.000192148	0	0.000532249	3.67002	0.00518799	0.0407353	0.107026	0.00981875	3.84295e-05	0.000192148	9.60739e-06
11042	Cumin, graine		427	8.06	17.8	33.7	2.25	10.6	10.5	22.3	1.54	14	3.28	0	762	3.33	168	366	499	1790	931	3.33	66.4	0.87	4.8	3.1	10	0.0216621	0.497215	0.000903009	0.00170963	0.000114144	0.000537747	0.000532674	0.0011313	7.81255e-05	0.000710232	0.000166397	0	0.0386569	0.000168934	0.00852278	0.0185675	0.0253147	0.0908082	0.0472304	0.000168934	0.00336853	4.41358e-05
11044	Sel au céleri		49	2.83	1.81	4.14	0	0	1.19	2.53	0	0	0	0	0	0	35000	3.15	8	16.9	13.3	0.12	0.29	0.15	0.088	0.5	980	0.0103179	0.174581	0.00038113	0.000871755	0	0	0.000250577	0.000532739	0	0	0	0	0	0	7.36991	0.000663292	0.00168455	0.00355861	0.00280057	2.52683e-05	6.1065e-05	3.15853e-05
11048	Noix de muscade		504	6.22	5.3	28.5	2.99	10.6	20.8	36.3	25.9	3.22	0.35	0	28	0	16	183	213	350	184	2.9	3.04	1.03	2.15	1.6	10	0.0484911	0.383707	0.000509927	0.00274206	0.000287676	0.00101985	0.00200122	0.00349252	0.00249191	0.000309805	3.36744e-05	0	0.00269395	0	0.0015394	0.0176069	0.0204933	0.0336744	0.0177031	0.000279017	0.000292486	9.9099e-05
11049	Paprika		319	11.2	14.1	19.1	10.3	8.8	34.9	12.9	2.14	1.7	7.77	0	81	29.1	68	178	314	2280	229	1.59	21.1	0.71	4.33	3.1	10	0.0263709	0.69092	0.00116561	0.00157894	0.000851473	0.000727472	0.00288509	0.00106641	0.000176908	0.000140534	0.000642325	0	0.00669605	0.00240562	0.00562137	0.0147148	0.0259575	0.188481	0.0189308	0.000131441	0.00174428	5.86938e-05
11053	Laurier, feuille		353	5.44	7.61	48.6	48.6	0	26.3	8.36	2.28	1.64	2.29	0	3710	1.79	23	120	113	529	834	8.17	43	0.42	3.7	3.1	10	0.0182035	0.335589	0.000392433	0.00250621	0.00250621	0	0.00135624	0.000431109	0.000117575	8.45716e-05	0.000118091	0	0.191317	9.23068e-05	0.00118606	0.00618816	0.00582719	0.0272795	0.0430077	0.000421311	0.00221743	2.16586e-05
11055	Oignon au vinaigre		54.87	89.62	0.7	6.49	2.81		1.4	2.59	0.679	0.88	0.776	11	6	0.35	129	8	2	98	27	0.13	0.33	0.023	0.09	0.4	10	0.00253168	5.52859	3.22977e-05	0.000299446	0.000129652	0	6.45953e-05	0.000119501	3.13287e-05	4.06028e-05	3.58043e-05	0.000507535	0.000276837	1.61488e-05	0.005952	0.000369116	9.22791e-05	0.00452167	0.00124577	5.99814e-06	1.5226e-05	1.06121e-06
11056	Quatre épices		348	8.46	6.09	50.5	3.1	10.6	21.6	8.69	2.55	0.66	2.36	0	81	2.32	77	135	113	1040	661	2.94	7.06	0.55	1.01	3.1	10	0.0383261	0.521891	0.000670707	0.00556169	0.000341411	0.0011674	0.00237886	0.000957052	0.000280838	7.26875e-05	0.000259913	0	0.00892074	0.000255507	0.00848021	0.0148679	0.012445	0.114538	0.0727976	0.00032379	0.000777536	6.05729e-05
11058	Sel blanc alimentaire, iodé, non fluoré (marin, ignigène ou gemme)		0	0.027	0	0	0	0	0	0	0	0	0	0	0	0	39100	3.15	8	16.9	13.3	0.12	0.29	0.15	0.088	0.5	1860	0	0.00166561	0	0	0	0	0	0	0	0	0	0	0	0	153.982	0.0124052	0.0315053	0.066555	0.0523776	0.00047258	0.00114207	0.000590725
11060	Herbes de Provence, séchées		283	7.1	11.5	23	18.5	2	40.1	7.2	1.88	0.53	2.86	0	1080	1.69	35	304	297	1970	1860	5.2	69.8	1.06	5.47	4.4	15	0.0538231	0.437994	0.00218716	0.00437432	0.00351847	0.000380375	0.00762653	0.00136935	0.000357553	0.000100799	0.000543937	0	0.205403	0.000321417	0.00665657	0.0578171	0.0564857	0.37467	0.353749	0.000988976	0.0132751	0.000201599
11061	Pavot, graine		551	5.17	19.7	13.7	2.99	10.6	14.8	43.1	4.69	6.16	29.7	0	81	1.14	23.5	339	860	710	1440	6.71	9.58	1.63	9.05	3.1	10	0.0015428	0.318933	5.51598e-05	3.83599e-05	8.37198e-06	2.96799e-05	4.14399e-05	0.00012068	1.3132e-05	1.7248e-05	8.31598e-05	0	0.000226799	3.19199e-06	6.57998e-05	0.000949197	0.00240799	0.00198799	0.00403199	1.87879e-05	2.68239e-05	4.56399e-06
11066	Fenouil, graine		326	8.81	15.7	12.5	12.5	0	39.8	14.9	0.48	9.91	1.69	0	81	2.72	88	385	487	1690	1200	6.53	18.5	1.07	3.7	3.1	10	0.00116988	0.543482	5.6341e-05	4.48575e-05	4.48575e-05	0	0.000142826	5.34701e-05	1.72253e-06	3.5563e-05	6.06473e-06	0	0.000290677	9.76099e-06	0.000315797	0.00138161	0.00174765	0.00606473	0.00430632	2.34336e-05	6.63891e-05	3.8398e-06
11068	Romarin, frais		121	67.8	3.31	6.6	1.1	0.18	14.1	5.86	2.84	1.16	0.9	0	696	1.46	26	91	66	668	317	0.96	6.65	0.3	0.93	1.6	3.9	0.0202367	4.18253	0.000553584	0.00110382	0.00018397	3.01042e-05	0.00235817	0.00098006	0.000474978	0.000194005	0.000150521	0	0.116403	0.000244179	0.00434839	0.0152194	0.0110382	0.11172	0.0530169	0.000160556	0.00111218	5.01737e-05
11069	Sauge, fraîche		36.7	85.6	4	0.97	0.3	0.18	7	0.25	0.005	0.005	0.005	0	652	1.46	11.1	54	57	510	230	1.9	4.6	0.13	0.28	10	10	0.000534869	5.2806	5.82963e-05	1.41369e-05	4.37222e-06	2.62333e-06	0.000102019	3.64352e-06	7.28704e-08	7.28704e-08	7.28704e-08	0	0.0095023	2.12782e-05	0.000161772	0.000787	0.000830723	0.00743278	0.00335204	2.76908e-05	6.70408e-05	1.89463e-06
11070	Thym, frais		107	65.1	5.56	10.5	1.1	0.18	14	1.68	0.47	0.081	0.53	0	2850	1.7	9	160	106	609	405	1.72	17.5	0.56	1.81	1.6	3.9	0.104543	4.01597	0.00543231	0.0102589	0.00107474	0.000175866	0.0136785	0.00164142	0.000459206	7.91398e-05	0.000517828	0	2.78455	0.00166096	0.00879331	0.156325	0.103566	0.595014	0.395699	0.0016805	0.0170981	0.000547139
11074	Gingembre, racine crue		32.9	90.9	1.1	3.4	1	2	2.7	1.1	0.09	0.8	0.13	0	43	0.75	6.3	26	26	320	11	7	0.4	0.05	0.24	10	10	0.000131563	5.60755	4.39877e-06	1.35962e-05	3.99888e-06	7.99776e-06	1.0797e-05	4.39877e-06	3.59899e-07	3.1991e-06	5.19854e-07	0	0.000171952	2.99916e-06	2.51929e-05	0.000103971	0.000103971	0.00127964	4.39877e-05	2.79922e-05	1.59955e-06	1.99944e-07
11075	Cardamome, poudre		321	8.28	10.8	40.5	3.1	10.6	28	6.7	1.82	1.19	1.69	0	81	2.32	18	229	178	1120	383	28	14	0.38	7.47	3.1	10	0.000125543	0.510787	4.22389e-06	1.58396e-05	1.21241e-06	4.14567e-06	1.09508e-05	2.62038e-06	7.11804e-07	4.6541e-07	6.60961e-07	0	3.16792e-05	9.07355e-07	7.03982e-06	8.95622e-05	6.9616e-05	0.000438033	0.000149792	1.09508e-05	5.47542e-06	1.48618e-07
11077	Fenugrec, graine		350	7.72	27.1	33.8	8.7	10.6	24.6	6.41	1.46	1.14	1.62	0	81	2.32	67	191	296	770	176	1.23	33.5	1.11	2.5	3.1	10	0.00477852	0.476241	0.000369994	0.000461468	0.00011878	0.000144721	0.000335862	8.75152e-05	1.99332e-05	1.55643e-05	2.21177e-05	0	0.00110589	3.16748e-05	0.000914745	0.00260771	0.00404126	0.0105127	0.00240291	1.67931e-05	0.000457372	1.51547e-05
11082	Fleur de sel, non iodée, non fluorée		0	3.75	0	0	0	0	0	0	0	0	0	0	0	0	37700	424	8	103	171	0.12	0.29	0.15	0.088	0.5	980	0	0.231335	0	0	0	0	0	0	0	0	0	0	0	0	3.82947	0.0430688	0.00081262	0.0104625	0.0173697	1.21893e-05	2.94575e-05	1.52366e-05
11083	Sel marin gris, non iodé, non fluoré		0	5.09	0	0	0	0	0	0	0	0	0	0	0	0	32200	503	8	99.3	181	0.12	0.29	0.15	0.088	0.5	100	0	0.313998	0	0	0	0	0	0	0	0	0	0	0	0	17.5923	0.274812	0.00437076	0.0542521	0.0988885	6.55614e-05	0.00015844	8.19518e-05
11084	Agar (algue), cru		51.61	82.2	3.51	7.94	0.58		0.7	0.49	0.146	0.06	0.125	0	1079	0.96	384	77	60	165	129	0.37	2.28	0.226	0.89	0.7	0	0.00823583	5.07086	0.000560119	0.00126705	9.25553e-05	0	0.000111705	7.81933e-05	2.32984e-05	9.57469e-06	1.99473e-05	0	0.172185	0.000153195	0.061278	0.0122875	0.00957469	0.0263304	0.0205856	5.90439e-05	0.000363838	3.60647e-05
11088	Poivre de Cayenne ou piment de Cayenne		376	8.05	12	29.4	10.3	10.6	27.2	17.3	3.26	2.75	8.37	0	81	29.8	30	152	293	2010	148	2	7.8	0.37	2.48	3.1	10	0.00814089	0.496598	0.000259816	0.000636548	0.000223008	0.000229504	0.000588915	0.000374567	7.05832e-05	5.95411e-05	0.000181221	0	0.00175376	0.000645209	0.000649539	0.003291	0.00634383	0.0435191	0.00320439	4.33026e-05	0.00016888	8.01098e-06
11089	Curcuma, poudre		291	12.9	9.68	44.4	3.21	10.6	22.7	3.25	1.84	0.45	0.76	0	81	4.43	27	208	299	2080	168	19.8	55	1.3	4.5	3.1	10	0.0194359	0.795791	0.000646526	0.00296547	0.000214396	0.000707973	0.00151613	0.000217067	0.000122893	3.00554e-05	5.07603e-05	0	0.00540998	0.000295879	0.00180333	0.0138923	0.0199702	0.138923	0.0112207	0.00132244	0.00367344	8.68269e-05
11090	Vinaigre de cidre		19	93.8	0	0.93	0.4	0	0	0	0	0	0	0	0	0	5	5	8	73	7	0.25	0.2	0.008	0.04	10	10	0.0146092	5.78645	0	0.000715084	0.000307563	0	0	0	0	0	0	0	0	0	0.00384454	0.00384454	0.00615126	0.0561303	0.00538235	0.000192227	0.000153782	6.15126e-06
11091	Vinaigre balsamique		125	70.3	0.69	25.8	19.1	0	0.5	0.3	0	0.17	0	0	2.5	1.03	27	12	24	160	18	0.19	0.95	0.03	0.12	10	10	0.336258	4.33675	0.00185614	0.0694037	0.0513802	0	0.00134503	0.000807019	0	0.000457311	0	0	0.00672516	0.00277077	0.0726318	0.0322808	0.0645616	0.43041	0.0484212	0.000511112	0.00255556	8.07019e-05
11092	Estragon, frais		44	85.9	3.8	4.1	1.2	0.18	6.2	0	0.6	0	0	0	696	1.46	11.3	31	65.5	555	210	1.06	3.19	0.21	0.87	1.6	3.9	0.00130644	5.29911	0.000112828	0.000121736	3.56301e-05	5.34451e-06	0.000184089	0	1.7815e-05	0	0	0	0.0206654	4.33499e-05	0.000335516	0.000920443	0.00194481	0.0164789	0.00623526	3.14732e-05	9.47166e-05	6.23526e-06
11093	Aneth, frais		48.2	86	3.93	3.9	1.2	0.18	3.5	1.1	0.27	0.54	0.064	0	696	1.7	27	28	51.9	647	202	2.7	5.5	0.22	1.8	2.7	3.9	0.00141993	5.30528	0.000115774	0.000114891	3.53509e-05	5.30264e-06	0.000103107	3.2405e-05	7.95396e-06	1.59079e-05	1.88538e-06	0	0.0205035	5.00805e-05	0.000795396	0.000824855	0.00152893	0.01906	0.00595074	7.95396e-05	0.000162025	6.48101e-06
11094	Coriandre, fraiche		22.3	92.2	2.13	0.87	0.87	0	2.8	0.52	0.014	0.28	0.04	0	3930	2.5	46	26	48	521	67	0.43	1.77	0.23	0.5	1.6	3.9	0.0111917	5.68775	0.00106898	0.000436626	0.000436626	0	0.00140523	0.000260972	7.02616e-06	0.000140523	2.00748e-05	0	1.97234	0.00125467	0.023086	0.0130486	0.0240897	0.261474	0.0336252	0.000215804	0.000888308	0.00011543
11096	Sel blanc alimentaire, iodé, fluoré à 25 mg /100g (marin, ignigène ou gemme)		0	0.027	0	0	0	0	0	0	0	0	0	0	0	0	39100	3.15	8	16.9	13.3	0.12	0.29	0.15	0.088	0.5	1860	0	0.00166561	0	0	0	0	0	0	0	0	0	0	0	0	12.539	0.00101018	0.00256553	0.00541969	0.0042652	3.8483e-05	9.30006e-05	4.81038e-05
11098	Vanille, extrait aqueux		292	19	0	81	61	0	0	0	0	0	0	0	0	0	5	11.4	2.5	70.3	45.5	0.064	0.14	0.014	0.072	1	0.3	0.0086933	1.1721	0	0.0024115	0.00181607	0	0	0	0	0	0	0	0	0	0.000148858	0.000339396	7.44289e-05	0.00209294	0.00135461	1.90538e-06	4.16802e-06	4.16802e-07
11174	Bouillon de volaille, déshydraté		233	9.37	11.3	20.8	5.38	0	0.58	11.5	6.75	1.94	0.37	0	0	2.17	19800	21.9	127	428	32.7	0.1	0.35	0.12	0.32	4.6	2.5	0.291328	0.578028	0.0141288	0.0260069	0.00672679	0	0.000725193	0.0143788	0.00843975	0.00242565	0.000462623	0	0	0.00271322	24.7566	0.0273823	0.158792	0.535143	0.0408859	0.000125033	0.000437617	0.00015004
11304	Fond de veau, préemballé		40.9	91.2	3.15	2.4	0.7	0.2	0.1	2.05	1	0.63	0.42	0	3.57	0.11	340	28.3	147	186	37.8	0.3	1.6	0.15	1.2	10	7.5	0.0203499	5.62606	0.00156729	0.00119412	0.000348286	9.95103e-05	4.97552e-05	0.00101998	0.000497552	0.000313457	0.000208972	0	0.00177626	5.47307e-05	0.169168	0.0140807	0.0731401	0.0925446	0.0188074	0.000149265	0.000796082	7.46327e-05
11506	Édulcorant à l'aspartame, en pastilles		216	21.3	6.35	69.3	6.65	0	2.2	0	0	0	0	0	0	0	327	11.4	2.5	70.3	45.5	0.064	0.14	0.014	0.072	1	0.3	0.031819	1.31398	0.00093542	0.0102086	0.000979613	0	0.000324082	0	0	0	0	0	0	0	0.0481704	0.00167934	0.000368275	0.0103559	0.00670261	9.42785e-06	2.06234e-05	2.06234e-06
11509	Édulcorant à l'aspartame, en poudre		259	4.67	0.63	94.7	9.33	0	0.13	0.13	0	0.024	0.0052	0	0	0	12.6	11.4	2.5	70.3	45.5	0.064	0.14	0.014	0.072	1	0.3	0.0161779	0.288089	3.93516e-05	0.00591523	0.000582778	0	8.12016e-06	8.12016e-06	0	1.49911e-06	3.24807e-07	0	0	0	0.000787031	0.000712076	0.000156157	0.00439114	0.00284206	3.99762e-06	8.74479e-06	8.74479e-07
12001	Camembert, sans précision		281	54.8	19.5	0	0	0	0	22.5	15.8	4.73	0.42	190	75.7	0.57	579	19.3	370	148	449	0.016	0.18	0.03	2.5	5.76	13.8	10.1152	3.38057	0.701943	0	0	0	0	0.809934	0.568753	0.170266	0.0151188	6.83944	2.72498	0.0205183	20.8423	0.694743	13.3189	5.32756	16.1627	0.000575953	0.00647947	0.00107991
12003	Fromage à pâte molle et croûte fleurie (type camembert)		361	46.7	17.5	0	0	0	0	32.3	22.4	6.83	1	470	75.7	0.46	470	23	354	69	523	0.02	0.22	0.05	0.63	10	30	2.10222	2.88089	0.101908	0	0	0	0	0.188093	0.130442	0.0397733	0.00582332	2.73696	0.440825	0.00267873	2.73696	0.133936	2.06146	0.401809	3.0456	0.000116466	0.00128113	0.000291166
12006	Camembert au lait cru		269	55.9	20.7	0	0.1	0	0	20.3	14.1	4.26	0.4	181	0	0.46	580	18	370	160	380	0.03	0.09	0.02	2.8	10	20	4.3445	3.44843	0.334317	0	0.00161506	0	0	0.327856	0.227723	0.0688014	0.00646023	2.92325	0	0.00742926	9.36733	0.29071	5.97571	2.58409	6.13721	0.000484517	0.00145355	0.000323011
12008	Fromage à pâte molle double crème environ 30% MG		334	51.2	17.5	0	0	0	0	29.4	18.5	8.48	0.89	268	75.7	0.8	511	6	160	112	200	0.05	0.3	0.05	0.54	3.5	13.8	1.70197	3.15849	0.0891751	0	0	0	0	0.149814	0.0942709	0.0432117	0.00453519	1.36565	0.385746	0.00407658	2.60391	0.0305743	0.815316	0.570721	1.01914	0.000254786	0.00152872	0.000254786
12009	Fromage rond à pâte molle et croûte fleurie environ 11% MG type camembert allégé en matière grasse		175	63.7	22.6	0	0	0	0	9.3	6.8	1.65	0.15	93.5	75.7	0.28	576	20	370	187	720	0.048	0.18	0.07	2.38	8.5	13.8	0.250373	3.9296	0.0323339	0	0	0	0	0.0133055	0.00972877	0.00236066	0.000214605	0.133771	0.108304	0.000400597	0.824084	0.028614	0.52936	0.267541	1.03011	6.86737e-05	0.000257526	0.000100149
12010	Coulommiers		280	56	18.8	0	0	0	0	22.8	15.8	6.11	0.68	196	75.7	0.6	534	21.7	185	165	400	0	0.23	0.07	3.28	5	28	2.0727	3.4546	0.139167	0	0	0	0	0.168777	0.11696	0.0452293	0.00503371	1.45089	0.56037	0.0044415	3.95294	0.160634	1.36946	1.22141	2.961	0	0.00170258	0.000518176
12012	Fromage rond à pâte molle et croûte fleurie environ 11% MG type coulommiers allégé en matière grasse		189	62.5	22.5	0	0	0	0	11	7.9	2.78	0.3	191	75.7	0.46	526	17.1	241	140	175	0.02	0.05	0.05	0.63	10	30	0.00469383	3.85558	0.000558789	0	0	0	0	0.000273186	0.000196197	6.90415e-05	7.45053e-06	0.0047435	0.00188002	1.14241e-05	0.0130633	0.00042468	0.00598526	0.00347691	0.00434614	4.96702e-07	1.24175e-06	1.24175e-06
12020	Brie, sans précision		299	52.5	17.3	0	0	0	0	25.5	16.3	7.78	0.82	204	9	0.47	599	20	282	145	424	0.05	0.36	0.045	2.38	6.41	13.8	2.74846	3.23869	0.159025	0	0	0	0	0.234401	0.149832	0.0715151	0.00753758	1.8752	0.0827296	0.00432032	5.50611	0.183844	2.59219	1.33287	3.89748	0.000459609	0.00330918	0.000413648
12021	Brie de Meaux		273	53.4	21.4	0	0.1	0	0	20.7	14.5	4.25	0.48	153	42.1	0.44	806	15	310	120	310	0.02	0.15	0.005	2.3	10	50	1.58898	3.29421	0.124557	0	0.000582044	0	0	0.120483	0.0843964	0.0247369	0.00279381	0.890528	0.245041	0.00256099	4.69128	0.0873066	1.80434	0.698453	1.80434	0.000116409	0.000873066	2.91022e-05
12025	Carré de l'Est		329	48	21.4	0	0	0	0	27	19	5.71	0.84	191	75.7	0.46	630	20	350	140	450	0.02	0.22	0.06	6	5	21	0.0193319	2.96108	0.00125746	0	0	0	0	0.00158651	0.00111643	0.000335517	4.9358e-05	0.0112231	0.0044481	2.70294e-05	0.0370185	0.00117519	0.0205659	0.00822634	0.0264418	1.17519e-06	1.29271e-05	3.52557e-06
12028	Chaource		277	56	17.3	0	0.1	0	0	22.9	15.8	4.84	0.63	236	78.2	0.59	760	12	220	130	110	0.03	0.06	0.03	0.56	10	10	0.26202	3.4546	0.0163644	0	9.45922e-05	0	0	0.0216616	0.0149456	0.00457826	0.000595931	0.223237	0.0739711	0.000558094	0.7189	0.0113511	0.208103	0.12297	0.104051	2.83776e-05	5.67553e-05	2.83776e-05
12030	Maroilles fermier		351	45.6	21.2	0	0	0	0	29.5	17.3	6.87	1.04	191	75.7	0.46	821	17.1	241	140	175	0.02	0.22	0.05	0.63	10	30	0.128627	2.81303	0.0077689	0	0	0	0	0.0108105	0.00633971	0.00251756	0.000381116	0.0699934	0.0277408	0.00016857	0.300862	0.00626642	0.0883162	0.051304	0.06413	7.32915e-06	8.06206e-05	1.83229e-05
12031	Neufchâtel		289	54.8	18.5	0	0	0	0	23.9	20	2.26	0.29	186	27	0.4	748	9.17	198	117	74.5	0.01	0.07	0.02	0.55	25	32	0.129504	3.38057	0.00829004	0	0	0	0	0.0107098	0.00896221	0.00101273	0.000129952	0.0833485	0.012099	0.000179244	0.335186	0.00410917	0.0887258	0.0524289	0.0333842	4.4811e-06	3.13677e-05	8.96221e-06
12033	Fromage à pâte molle triple crème environ 40% MG		377	49.4	9.89	0	0	0	0	37.5	25.1	10.6	0.91	314	75.7	0.94	436	6	140	119	230	0.035	0.3	0.07	0.54	3.2	13.8	0.138791	3.04745	0.00364096	0	0	0	0	0.0138055	0.00924046	0.00390235	0.000335013	0.115598	0.0278686	0.000346057	0.160512	0.00220888	0.0515404	0.0438094	0.0846736	1.28851e-05	0.000110444	2.57702e-05
12035	Fromage à pâte molle et croûte lavée, allégé environ 13% MG		199	59.9	21.6	0	0	0	0	12.6	8.08	3.76	0.47	132	75.7	0.46	650	19	268	94	420	0.02	0.22	0.05	0.63	10	31.5	0.00231452	3.69519	0.000251224	0	0	0	0	0.000146547	9.39764e-05	4.37316e-05	5.46645e-06	0.00153526	0.000880447	5.35014e-06	0.00755998	0.000220984	0.00311704	0.00109329	0.00488491	2.32615e-07	2.55876e-06	5.81537e-07
12036	Maroilles, sans précision		327	48.3	21.9	0	0.1	0	0	26.4	18.1	5.8	0.55	222	84.5	0.57	834	23	410	100	580	0.02	0.09	0.03	2.8	10	10	0.365589	2.97959	0.0244844	0	0.000111801	0	0	0.0295154	0.0202359	0.00648445	0.000614905	0.248198	0.0944717	0.000637265	0.932419	0.0257142	0.458383	0.111801	0.648445	2.23602e-05	0.000100621	3.35402e-05
12037	Livarot		303	48.9	24.6	0	0.1	0	0	22.6	15.3	4.7	0.54	168	119	0.57	601	26	470	94	730	0.02	0.07	0.03	3.1	10	30	0.0983224	3.0166	0.00798261	0	3.24496e-05	0	0	0.00733362	0.0049648	0.00152513	0.000175228	0.0545154	0.0386151	0.000184963	0.195022	0.00843691	0.152513	0.0305027	0.236882	6.48993e-06	2.27148e-05	9.73489e-06
12038	Époisses		292	55.6	17.8	0	0.015	0	0	24.5	17.1	5.62	0.48	210	75.7	0.64	702	10	220	140	120	0.01	0.21	0.02	0.5	10	21	0.100011	3.42992	0.00609655	0	5.13754e-06	0	0	0.00839132	0.0058568	0.00192487	0.000164401	0.0719256	0.0259275	0.000219202	0.240437	0.00342503	0.0753506	0.0479504	0.0411004	3.42503e-06	7.19256e-05	6.85006e-06
12039	Munster		345	49.4	21.2	0	0	0	0	29	18.8	8.54	0.82	297	13	0.26	670	27	468	134	717	0.008	0.41	0.031	2.81	4.32	30.4	0.776101	3.04745	0.0476908	0	0	0	0	0.0652375	0.0422919	0.0192113	0.00184465	0.668122	0.0292444	0.000584888	1.50721	0.0607383	1.0528	0.301442	1.61294	1.79965e-05	0.000922323	6.97366e-05
12040	Langres		283	56.2	16.7	0	0.1	0	0	23.8	16.9	4.75	0.52	220	74.4	0.65	397	12	220	140	160	0.01	0.05	0.03	1.2	10	30	0.026387	3.46694	0.00155712	0	9.32405e-06	0	0	0.00221912	0.00157576	0.000442892	4.8485e-05	0.0205129	0.00693709	6.06063e-05	0.0370165	0.00111889	0.0205129	0.0130537	0.0149185	9.32405e-07	4.66202e-06	2.79721e-06
12042	Pont l'Évêque		328	47.9	22.7	0	0.1	0	0	26.2	18.2	5.08	0.6	191	113	0.46	520	24	430	110	660	0.02	0.07	0.03	2.8	10	30	0.080285	2.95491	0.00555631	0	2.44771e-05	0	0	0.00641301	0.00445484	0.00124344	0.000146863	0.0467513	0.0276592	0.000112595	0.127281	0.00587451	0.105252	0.0269248	0.161549	4.89543e-06	1.7134e-05	7.34314e-06
12045	Reblochon		328	49.1	20.4	0	0	0	0	27.4	18.8	5.77	1.04	191	75.7	0.46	509	20.2	322	104	471	0	0.32	0.11	4.44	5.1	19.4	2.32064	3.02894	0.144333	0	0	0	0	0.193859	0.133012	0.0408235	0.00735814	1.35135	0.535587	0.00325456	3.60124	0.142918	2.27819	0.735814	3.33239	0	0.00226404	0.000778264
12047	Fromage à pâte molle à croûte lavée, au lait pasteurisé (type Vieux Pané)		313	51.8	20.3	0	0	0	0	25.7	17.4	5.82	0.55	250	75.7	0.46	626	18.1	357	99.3	450	0.02	0.22	0.05	0.63	10	30	0.878273	3.1955	0.0569615	0	0	0	0	0.0721138	0.0488241	0.0163308	0.00154329	0.701496	0.212413	0.00129075	1.75655	0.0507883	1.00174	0.278634	1.26269	5.61197e-05	0.000617316	0.000140299
12049	Saint-Marcellin		281	58.3	15.1	0	0.1	0	0	24.3	18.1	3.86	0.47	192	113	0.61	433	12	210	180	140	0.01	0.05	0.04	0.54	10	10	0.214612	3.59648	0.0115325	0	7.63743e-05	0	0	0.018559	0.0138238	0.00294805	0.000358959	0.146639	0.086303	0.000465883	0.330701	0.00916492	0.160386	0.137474	0.106924	7.63743e-06	3.81872e-05	3.05497e-05
12050	Fromage à pâte molle et croûte mixte (lavée et fleurie) colorée		334	47.8	18.2	0	0	0	0	29	18.5	7.84	1.11	191	75.7	0.46	526	17.1	338	140	450	0.02	0.2	0.05	0.63	10	30	0.0318023	2.94875	0.00173294	0	0	0	0	0.00276128	0.00176151	0.000746498	0.00010569	0.0181864	0.0072079	4.37996e-05	0.0500839	0.0016282	0.0321832	0.0133303	0.0428475	1.90433e-06	1.90433e-05	4.76083e-06
12051	Mont d'or ou Vacherin du Haut-Doubs (produit en France) ou Vacherin-Mont d'Or (produit en Suisse)		304	52.9	18.9	0	0	0	0	25.4	16.3	6.5	1.21	191	100	0.46	523	30	430	120	491	0.02	0.22	0.07	8	5.8	30	0.583856	3.26336	0.0362989	0	0	0	0	0.0487827	0.0313054	0.0124838	0.0023239	0.366831	0.192058	0.000883466	1.00446	0.0576174	0.825849	0.230469	0.943004	3.84116e-05	0.000422527	0.000134441
12052	Saint-Félicien		283	58.6	13.4	0	0	0	0	25.2	18	4.9	0.6	205	114	0.65	511	9.6	160	130	110	0.005	0.04	0.02	0.44	10	50	0.146323	3.61499	0.00692838	0	0	0	0	0.0130295	0.00930678	0.00253351	0.000310226	0.105994	0.058943	0.000336078	0.264209	0.00496362	0.082727	0.0672157	0.0568748	2.58522e-06	2.06817e-05	1.03409e-05
12061	Feta de brebis		280	54.4	14.8	2.5	1.13	0	0	22.8	14.3	4.63	1.04	179	0	0.37	1040	18.3	207	95	318	0	0.2	0.05	1.03	6.85	21	0.798059	3.35589	0.0421831	0.00712553	0.00322074	0	0	0.0649848	0.040758	0.0131965	0.00296422	0.510188	0	0.00105458	2.96422	0.0521589	0.589994	0.27077	0.906367	0	0.000570042	0.000142511
12105	Beaufort		412	34.3	26.5	0	0	0	0	34	19.2	5.84	0.95	256	100	0.52	506	31.6	788	118	745	0.03	0.24	0.09	4.75	7.22	37.3	0.398353	2.11594	0.0256222	0	0	0	0	0.0328738	0.018564	0.00564655	0.000918532	0.24752	0.0966876	0.000502775	0.489239	0.0305533	0.761898	0.114091	0.720322	2.90063e-05	0.00023205	8.70188e-05
12110	Comté		420	33.2	27.2	0	0	0	0	34.6	22.5	8.49	1.63	263	100	0.8	322	43.7	681	116	993	0.03	0.49	0.61	3.84	7.02	24.4	11.0255	2.04808	0.714029	0	0	0	0	0.908287	0.590649	0.222872	0.0427893	6.90403	2.62511	0.0210009	8.45285	1.14717	17.877	3.04512	26.0673	0.000787532	0.012863	0.0160132
12112	Abondance		395	37.2	27.1	0	0.1	0	0	31.6	20.1	7.47	0.94	261	149	0.75	690	28	570	120	760	0.02	0.09	0.49	3.5	10	10	0.451619	2.29484	0.0309845	0	0.000114334	0	0	0.0361295	0.0229811	0.00854074	0.00107474	0.298411	0.170357	0.000857504	0.788904	0.0320135	0.651703	0.137201	0.868937	2.28668e-05	0.0001029	0.000560236
12113	Gruyère IGP France		398	36.9	27.3	0	0	0	0	32	20.1	8.28	1.55	256	100	0.52	643	31.6	536	97.6	871	0.027	0.18	0.086	3.46	8.82	20.7	4.47749	2.27633	0.307124	0	0	0	0	0.359999	0.226125	0.0931498	0.0174375	2.87999	1.125	0.00584999	7.23373	0.355499	6.02999	1.098	9.79873	0.000303749	0.002025	0.000967498
12114	Gruyère		426	32.5	28.4	0	0	0	0	34.6	19.8	9.55	1.47	262	33	0.52	320	39.2	608	101	1090	0.031	0.29	0.41	4.89	5.33	13.8	4.10996	2.0049	0.273998	0	0	0	0	0.333814	0.191027	0.0921365	0.0141823	2.52772	0.318378	0.00501686	3.0873	0.378194	5.86586	0.974428	10.5161	0.000299082	0.00279786	0.0039556
12115	Emmental ou emmenthal		375	39.1	27.9	0	0	0	0	28.8	19.7	6.58	0.54	247	133	0.74	245	48.9	610	97.1	898	0.024	0.15	0.043	3.48	5	13.8	17.1248	2.41205	1.27409	0	0	0	0	1.31518	0.899623	0.300483	0.0246597	11.2795	6.0736	0.0337929	11.1882	2.23307	27.8563	4.43418	41.0082	0.00109599	0.00684992	0.00196364
12116	Fromage à pate pressée cuite type emmental ou emmenthal, allégé en matière grasse		284	46.2	30.6	0	0	0	0	18	8.5	3.72	0.45	108	100	0.22	400	45	629	110	950	0.09	0.2	0.09	4.1	10	32.3	0.456192	2.85004	0.0491531	0	0	0	0	0.0289136	0.0136536	0.00597548	0.00072284	0.173482	0.160631	0.000353388	0.642524	0.072284	1.01037	0.176694	1.526	0.000144568	0.000321262	0.000144568
12118	Emmental ou emmenthal râpé		370	38	28.1	0	0.13	0	0	28.6	18.1	7.51	1.14	193	100	0.43	297	38.3	635	97.4	979	0.05	1.5	0.05	4.4	16.4	21.4	2.28536	2.34419	0.173564	0	0.000802965	0	0	0.176652	0.111797	0.0463867	0.00704138	1.19209	0.617665	0.00265596	1.83447	0.236566	3.92217	0.601606	6.04694	0.000308833	0.00926498	0.000308833
12119	Ossau-Iraty		430	33.8	24.2	0	0	0	0	37	24.4	8.43	1.78	273	100	0.15	673	35.6	536	45.7	764	0.027	0.32	0.057	2.43	8.82	20.7	1.06018	2.0851	0.0596658	0	0	0	0	0.0912246	0.0601589	0.0207844	0.00438864	0.67309	0.246553	0.00036983	1.6593	0.0877729	1.32152	0.112675	1.88367	6.65693e-05	0.00078897	0.000140535
12120	Parmesan		409	30.4	31.1	0	0	0	0	31	20.6	7.23	0.96	334	26.7	0.17	628	40	630	110	980	0.02	0.1	0.71	3.9	20	90	2.1949	1.87535	0.166898	0	0	0	0	0.166362	0.11055	0.0387998	0.00515184	1.79241	0.143286	0.000912306	3.37016	0.21466	3.3809	0.590315	5.25917	0.00010733	0.00053665	0.00381022
12300	Fromage fondu en tranchettes		247	56.1	14.1	5.34	4.95	0	0	18.5	12.3	4.33	0.43	161	0	0.53	983	25	840	370	490	0.01	0.12	0.02	1.8	10	24	0.393706	3.46077	0.0224747	0.00851169	0.00789005	0	0	0.0294881	0.0196056	0.0069018	0.000685398	0.256626	0	0.000844793	1.56685	0.0398487	1.33892	0.589761	0.781035	1.59395e-05	0.000191274	3.1879e-05
12310	Fromage fondu en portions ou en cubes environ 20% MG		243	59.4	10.7	6.38	0	0	0	19.3	12.9	4.48	0.44	209	0	0.63	634	26	800	199	513	0.041	0.34	0.35	2.6	8	13.8	1.99947	3.66434	0.0880424	0.0524963	0	0	0	0.158805	0.106145	0.0368626	0.00362044	1.71971	0	0.00518381	5.21672	0.213935	6.58261	1.63742	4.2211	0.000337359	0.00279761	0.00287989
12315	Spécialité fromagère non affinée environ 25% MG, type fromage en barquette à tartiner ou coque fromagère		256	63.4	5.36	4.24	2.82	0	0	23.9	16.4	5.38	0.45	207	63	0.34	440	29	205	216	772	0.014	0.61	0.027	3.61	6.7	20	1.62014	3.9111	0.0339218	0.0268336	0.0178469	0	0	0.151256	0.10379	0.0340483	0.00284791	1.31004	0.398707	0.00215175	2.78462	0.183532	1.29738	1.367	4.88575	8.86016e-05	0.0038605	0.000170875
12320	Fromage fondu double crème, environ 31% MG		312	56.3	9.06	1.78	1.78	0	0	29.6	20.1	6.73	0.7	300	0	0.53	547	18	250	117	50	0.05	0.2	0.05	2	6.7	20	0.861233	3.4731	0.0250089	0.00491345	0.00491345	0	0	0.0817068	0.0554833	0.0185772	0.00193225	0.828109	0	0.00146299	1.50992	0.0496865	0.690091	0.322963	0.138018	0.000138018	0.000552073	0.000138018
12325	Cancoillotte (spécialité fromagère fondue)		152	72.5	13.8	0.5	0	0	0	10.5	7.06	2.38	0.22	65.2	0	0.15	692	8	425	59	101	0.02	0.13	0.1	1.4	4.5	20	0.266394	4.47247	0.0241858	0.000876297	0	0	0	0.0184022	0.0123733	0.00417117	0.000385571	0.114269	0	0.000262889	1.21279	0.0140207	0.744852	0.103403	0.177012	3.50519e-05	0.000227837	0.000175259
12340	Spécialité fromagère non affinée environ 20% MG, type fromage en barquette à tartiner ou coque fromagère		228	67.5	7.65	1.4	1.4	0	0	21.2	11.4	4.55	0.78	162	55.5	0.5	496	14	111	119	104	0.014	0.24	0.05	2	7	20	0.208503	4.16402	0.00699583	0.00128028	0.00128028	0	0	0.0193871	0.0104252	0.00416092	0.0007133	0.148147	0.0507541	0.000457244	0.453586	0.0128028	0.101508	0.108824	0.0951067	1.28028e-05	0.000219477	4.57244e-05
12500	Roquefort		386	41.9	19.5	0	0	0	0	33.9	24.9	5.88	0.84	212	74	0.12	1290	31.9	392	115	660	0.019	0.1	0.024	1.83	5	51.2	2.42474	2.58478	0.122493	0	0	0	0	0.21295	0.156415	0.0369365	0.00527664	1.33172	0.464847	0.000753806	8.10341	0.200387	2.46243	0.722397	4.14593	0.000119353	0.000628172	0.000150761
12519	Fourme de Montbrison		367	42.8	22.5	0	0	0	0	30.8	20.5	7.28	1.04	224	74	0.14	652	18.1	320	126	523	0.05	0.23	0.05	2.5	5.5	48	0.222925	2.6403	0.0136671	0	0	0	0	0.0187087	0.0124522	0.00442205	0.000631722	0.136063	0.0449494	8.50395e-05	0.396041	0.0109944	0.194376	0.0765355	0.317683	3.03712e-05	0.000139708	3.03712e-05
12520	Fromage bleu au lait de vache		334	46.2	19.9	0	0.13	0	0	28.3	17.7	8.65	0.93	224	74	0.59	850	23	369	130	494	0.05	0.23	0.05	3.88	5.5	13.8	1.20144	2.85004	0.0715829	0	0.000467627	0	0	0.101799	0.0636692	0.0311152	0.00334533	0.805757	0.266188	0.00212231	3.05756	0.082734	1.32734	0.467627	1.77698	0.000179856	0.00082734	0.000179856
12521	Fromage bleu d'Auvergne		345	44.1	22.4	0	0	0	0	28.4	19	6.95	0.81	250	74	0.14	1050	18.1	301	126	551	0.05	0.3	0.07	2.69	3.73	27.1	0.686818	2.7205	0.0445934	0	0	0	0	0.0565381	0.0378248	0.0138359	0.00161253	0.497694	0.147318	0.000278709	2.09032	0.0360331	0.599224	0.250838	1.09692	9.95389e-05	0.000597233	0.000139354
12524	Gorgonzola		314	51.1	19	0	0.15	0	0	26.4	16.9	7.28	0.75	286	168	0.16	710	18	310	110	390	0.01	0.08	0.02	2.1	10	70	1.11342	3.15232	0.0673723	0	0.000531887	0	0	0.0936121	0.0599259	0.0258142	0.00265943	1.01413	0.595713	0.000567346	2.5176	0.0638264	1.09923	0.39005	1.38291	3.54591e-05	0.000283673	7.09182e-05
12526	Bleu de Gex ou Fromage bleu du Haut-jura ou Bleu de septmoncel (AOC)		366	43.6	22.5	0	0	0	0	30.7	20.2	7.61	1.19	224	74	0.14	575	18.1	320	126	600	0.05	0.23	0.05	2.5	5.5	48	0.101196	2.68965	0.00622108	0	0	0	0	0.00848832	0.00558515	0.00210411	0.000329026	0.0619343	0.0204604	3.87089e-05	0.158983	0.00500451	0.0884776	0.034838	0.165895	1.38246e-05	6.35933e-05	1.38246e-05
12527	Fromage bleu de Bresse		344	51.9	17.4	0	0	0	0	30.5	19.4	8.5	0.9	108	25	0.05	450	17	320	128	434	0.05	0.5	0.05	2.5	16.1	48	0.50051	3.20167	0.0253165	0	0	0	0	0.0443766	0.0282264	0.0123673	0.00130947	0.157137	0.0363743	7.27486e-05	0.654737	0.0247345	0.465591	0.186236	0.631458	7.27486e-05	0.000727486	7.27486e-05
12705	Fromage à pâte ferme environ 14% MG type Masdaam à teneur réduite en MG		240	52.2	29	0	0	0	0	13.8	8.9	3.77	0.36	117	100	0.35	824	31.6	568	76.3	717	0.059	0.21	0.086	4.23	9.63	13.8	0.00446843	3.22018	0.000539935	0	0	0	0	0.000256934	0.000165704	7.01915e-05	6.70264e-06	0.00217836	0.00186184	6.51645e-06	0.0153416	0.000588343	0.0105753	0.00142059	0.0133494	1.09849e-06	3.90987e-06	1.60119e-06
12720	Fromage à pâte ferme, enrobé de cire		304	49.6	21.7	0	0	0	0	23.7	16.3	5.31	0.42	256	100	0.52	679	29.3	546	74.5	608	0.014	0.15	0.03	2.57	5	27	0.356534	3.05979	0.02545	0	0	0	0	0.0277956	0.0191168	0.00622762	0.00049258	0.300239	0.117281	0.000609861	0.796338	0.0343633	0.640354	0.0873743	0.713068	1.64193e-05	0.000175921	3.51843e-05
12722	Cantal entre-deux		385	37.1	26.6	0	0	0	0	30.5	19.9	7.29	0.78	256	100	0.52	741	31.6	536	97.6	791	0.027	0.18	0.086	3.46	8.82	20.7	2.89521	2.28867	0.200033	0	0	0	0	0.229361	0.149649	0.0548211	0.00586563	1.92513	0.752004	0.00391042	5.57235	0.237633	4.03074	0.733956	5.94835	0.000203041	0.00135361	0.000646723
12723	Cantal, Salers ou Laguiole		380	39.6	25.3	0	0.25	0	0	31	24.2	5.9	0.94	160	140	0.52	768	25.7	487	97.8	772	0.04	0.54	0.09	4.1	5.44	21.8	0.147234	2.44289	0.0098027	0	9.68647e-05	0	0	0.0120112	0.0093765	0.00228601	0.000364211	0.0619934	0.0542442	0.000201479	0.297568	0.00995769	0.188692	0.0378935	0.299118	1.54983e-05	0.000209228	3.48713e-05
12725	Salers		390	38.6	25.9	0	0.1	0	0	31.4	20	7.78	0.75	311	107	0.72	875	25	480	96	680	0.02	0.11	0.03	2.9	10	10	0.0480352	2.3812	0.00319003	0	1.23167e-05	0	0	0.00386745	0.00246335	0.000958242	9.23755e-05	0.038305	0.0131789	8.86805e-05	0.107771	0.00307918	0.0591203	0.0118241	0.0837538	2.46335e-06	1.35484e-05	3.69502e-06
12726	Cheddar		401	37.1	24	0	0	0	0	33.8	19.5	8.67	1.38	256	85	0.78	644	27	473	76	675	0.033	0.16	0.056	3.43	11.1	37.5	1.9997	2.28867	0.119683	0	0	0	0	0.168553	0.0972421	0.0432353	0.00688175	1.27661	0.423876	0.00388968	3.21148	0.134643	2.35874	0.378995	3.36607	0.000164564	0.000797884	0.000279259
12729	Edam		331	41.6	25.5	0	0.13	0	0	25.5	16.9	6.84	0.62	242	11	0.24	890	41.2	536	106	802	0.018	0.12	0.056	3.09	5	28.4	1.27177	2.56627	0.0979763	0	0.000499487	0	0	0.0979763	0.0649333	0.0262807	0.00238217	0.929814	0.0422643	0.00092213	3.41956	0.158299	2.05942	0.407274	3.08145	6.91597e-05	0.000461065	0.000215164
12736	Gouda		376	38.4	23.2	0	0.13	0	0	31.5	20.3	7.65	0.73	164	10	0.24	795	29	546	121	728	0.05	0.24	0.036	3.9	9.02	29.7	1.55452	2.36887	0.095917	0	0.000537466	0	0	0.130232	0.0839273	0.0316278	0.00301808	0.678034	0.0413435	0.000992244	3.28681	0.119896	2.25736	0.500257	3.00981	0.000206718	0.000992244	0.000148837
12740	Mimolette, sans précision		310	45.5	24.9	0	0.13	0	0	23.4	16.8	5.66	0.58	120	112	0.3	1140	37.1	514	103	816	0.03	0.5	0.07	3.1	4.9	5	0.51607	2.80686	0.0414521	0	0.000216416	0	0	0.0389549	0.0279677	0.00942244	0.00096555	0.199769	0.186451	0.000499422	1.89781	0.0617619	0.855677	0.171468	1.35843	4.99422e-05	0.000832371	0.000116532
12741	Fromage à pâte ferme environ 27% MG type Maasdam		361	41.1	25.5	0	0	0	0	28.4	19.5	6.48	0.54	240	100	0.5	517	33.5	519	81	848	0.05	0.12	0.05	3.06	8	20	1.04215	2.53543	0.0736145	0	0	0	0	0.0819863	0.0562934	0.0187067	0.00155889	0.692842	0.288684	0.00144342	1.4925	0.0967092	1.49827	0.233834	2.44804	0.000144342	0.000346421	0.000144342
12743	Morbier		356	43.6	22.8	0	0	0	0	29.2	19.2	6.4	0.75	201	100	0.55	562	23	430	83	600	0.02	0.06	0.14	2.8	10	10	1.17774	2.68965	0.0754283	0	0	0	0	0.0966012	0.0635186	0.0211729	0.0024812	0.66496	0.330826	0.00181954	1.85924	0.07609	1.42255	0.274586	1.98496	6.61652e-05	0.000198496	0.000463157
12747	Fromage de brebis des Pyrénées		399	36.9	24.1	0	0	0	0	33.6	20.7	10.9	1.09	250	100	0.67	648	35.9	505	71.9	750	0.05	0.3	0.05	2.4	19.9	124	0.0939915	2.27633	0.00567718	0	0	0	0	0.00791508	0.00487625	0.00256769	0.000256769	0.0588919	0.0235568	0.00015783	0.152648	0.00845688	0.118962	0.0169373	0.176676	1.17784e-05	7.06703e-05	1.17784e-05
12749	Raclette (fromage)		343	44.7	23.4	0	0	0	0	27.5	18.5	6.26	0.69	183	100	0.51	676	24.5	460	75.9	630	0.05	0.18	0.06	3	8	20	2.37436	2.75751	0.161982	0	0	0	0	0.190364	0.128063	0.0433338	0.00477641	1.26679	0.692233	0.00353039	4.67949	0.169597	3.18427	0.525405	4.36107	0.000346116	0.00124602	0.00041534
12751	Saint-Nectaire, fermier		357	46.8	22.3	0	0.25	0	0	29.8	19.8	7.04	0.83	256	100	0.52	643	31.6	536	97.6	762	0.027	0.18	0.086	3.46	8.82	20.7	0.574471	2.88706	0.0358843	0	0.00040229	0	0	0.047953	0.0318614	0.0113285	0.0013356	0.411945	0.160916	0.000836764	1.03469	0.0508495	0.86251	0.157054	1.22618	4.34474e-05	0.000289649	0.000138388
12752	Saint-Nectaire, sans précision		346	44.6	22.5	0	0.25	0	0	28.4	18.8	6.4	0.74	256	100	0.52	620	24	227	83.8	540	0.035	0.22	0.067	2.83	5.11	31.4	1.26793	2.75134	0.0824519	0	0.000916133	0	0	0.104073	0.0688932	0.023453	0.00271175	0.93812	0.366453	0.00190556	2.27201	0.0879487	0.831849	0.307088	1.97885	0.000128259	0.000806197	0.000245524
12755	Saint-Paulin (fromage à pâte pressée non cuite demi-ferme)		329	47.5	22.3	0	0	0	0	26.4	17.9	5.89	0.61	243	100	0.67	642	25	400	71	600	0.02	0.11	0.03	2.7	10	10	0.802412	2.93024	0.0543884	0	0	0	0	0.064388	0.043657	0.0143654	0.00148775	0.592663	0.243894	0.00163409	1.5658	0.0609735	0.975576	0.173165	1.46336	4.87788e-05	0.000268284	7.31682e-05
12758	Tomme ou tome		352	42.3	21.6	0	0	0	0	29.4	19.4	6.74	0.74	256	100	0.52	510	33.8	478	130	953	0.022	0.18	0.11	4.36	3.73	20	0.763942	2.60946	0.0468783	0	0	0	0	0.0638066	0.0421036	0.0146278	0.00160602	0.555595	0.217029	0.00112855	1.10685	0.0733558	1.0374	0.282138	2.06829	4.77464e-05	0.000390652	0.000238732
12759	Tomme ou tome de montagne ou de Savoie		366	41.6	25.6	0	0.1	0	0	29.1	19.8	6.42	0.6	265	161	0.85	493	20	510	140	600	0.02	0.07	0.31	2.9	10	10	2.49432	2.56627	0.174466	0	0.000681508	0	0	0.198319	0.134939	0.0437528	0.00408905	1.806	1.09723	0.00579282	3.35983	0.136302	3.47569	0.954111	4.08905	0.000136302	0.000477056	0.00211267
12760	Tomme ou tome, allégée en matière grasse, environ 13% MG		233	51	31	0	0	0	0	12.1	8.44	3.09	0.36	256	100	0.52	737	31.6	536	97.6	852	0.027	0.18	0.086	3.46	8.82	20.7	0.0151645	3.14615	0.00201759	0	0	0	0	0.00078751	0.000549305	0.000201108	2.34301e-05	0.0166614	0.00650835	3.38434e-05	0.0479665	0.00205664	0.0348848	0.00635215	0.0554511	1.75725e-06	1.1715e-05	5.59718e-06
12762	Fromage de brebis Corse à pâte molle		460	28.7	28.5	0	0	0	0	38.4	25.7	9.3	1.8	292	100	0.21	957	34.2	536	105	576	0.027	0.21	0.086	2	8.82	20.7	0.573012	1.77048	0.0355018	0	0	0	0	0.047834	0.0320139	0.0115848	0.00224222	0.363738	0.124568	0.000261592	1.19211	0.0426022	0.667683	0.130796	0.71751	3.36333e-05	0.000261592	0.000107128
12763	Tome des Bauges		383	39.5	26.6	0	0	0	0	30.8	19	8.1	1.64	256	100	0.52	459	31.6	536	97.6	762	0.027	0.18	0.086	3.46	8.82	20.7	0.184274	2.43673	0.0127982	0	0	0	0	0.0148189	0.00914154	0.00389718	0.00078906	0.12317	0.0481134	0.00025019	0.22084	0.0152038	0.257888	0.0469587	0.366624	1.29906e-05	8.66041e-05	4.13775e-05
12800	Fromage de chèvre frais, au lait pasteurisé (type bûchette fraîche)		253	60	16.1	2.08	2.08	0	0	20	13.4	4.39	0.72	146	55.5	0.32	387	11.2	161	111	96.7	0.014	0.22	0.05	0.79	7.58	28.3	0.239216	3.70135	0.0152228	0.00196667	0.00196667	0	0	0.0189103	0.0126699	0.00415082	0.000680772	0.138045	0.0524762	0.000302565	0.365915	0.0105898	0.152228	0.104952	0.0914314	1.32372e-05	0.000208014	4.72758e-05
12801	Fromage de chèvre lactique affiné, au lait cru (type Crottin de Chavignol, Picodon, Rocamadour, Sainte-Maure de Touraine)		326	49.7	20.7	0	0	0	0	27	18.7	5.54	0.86	176	75.7	0.53	513	16.2	208	230	123	0.02	0.31	0.057	0.56	10.9	31	0.0954246	3.06596	0.00605917	0	0	0	0	0.00790327	0.00547374	0.00162163	0.000251734	0.0515176	0.0221584	0.000155138	0.150162	0.00474196	0.0608844	0.0673241	0.0360038	5.85427e-06	9.07412e-05	1.66847e-05
12803	Fromage de chèvre lactique affiné (type bûchette, crottin, Sainte-Maure)		317	50.3	20.4	0	0	0	0	26.2	18	5.44	0.86	169	0	0.45	505	14.9	199	161	117	0.02	0.28	0.055	0.58	10.8	30.6	0.573697	3.10297	0.0369193	0	0	0	0	0.047416	0.0325759	0.00984515	0.0015564	0.305851	0	0.000814397	0.913934	0.0269656	0.360144	0.291373	0.211743	3.61954e-05	0.000506736	9.95374e-05
12805	Fromage de chèvre frais, au lait pasteurisé ou cru (type crottin frais ou bûchette fraîche)		233	62.8	14.6	2.05	2.05	0	0	18.4	12.5	3.89	0.63	129	54	0.35	349	11.6	158	159	94.2	0.1	0.25	0.05	0.59	6.04	28.7	0.567014	3.87408	0.0355296	0.00498875	0.00498875	0	0	0.0447771	0.0304192	0.00946645	0.00153313	0.313926	0.131411	0.000851737	0.849304	0.028229	0.384499	0.386932	0.229239	0.000243354	0.000608384	0.000121677
12807	Sainte-Maure de Touraine (fromage de chèvre)		296	53.4	19.6	0	0	0	0	24.2	18.7	3.96	0.76	191	75.7	0.46	526	17.1	241	140	175	0.02	0.22	0.05	0.63	10	30	0.570545	3.29421	0.0377793	0	0	0	0	0.0466459	0.0360445	0.00763296	0.00146491	0.368156	0.145913	0.000886657	1.01387	0.0329605	0.464531	0.269852	0.337315	3.85503e-05	0.000424054	9.63758e-05
12810	Fromage de chèvre demi-sec		355	45.5	21.6	0	0	0	0	29.8	20.6	6.81	0.71	401	77	0.26	471	18.2	375	165	145	0.036	1.62	0.068	0.64	8.85	69.5	0.00913375	2.80686	0.000555744	0	0	0	0	0.000766721	0.000530015	0.000175214	1.82675e-05	0.0103173	0.00198112	6.68951e-06	0.0121183	0.000468266	0.00964833	0.00424527	0.00373069	9.2624e-07	4.16808e-05	1.74956e-06
12812	Fromage de chèvre bûche		287	54.8	18.8	0	0	0	0	23.3	16.2	4.88	0.62	152	75.7	0.29	630	12.7	183	167	107	0.02	0.22	0.05	0.61	10.1	30	3.29938	3.38057	0.216127	0	0	0	0	0.267859	0.186237	0.056101	0.00712759	1.74741	0.870256	0.00333387	7.24255	0.146001	2.10379	1.91985	1.23008	0.000229922	0.00252914	0.000574806
12813	Fromage de chèvre bûche, allégé en matière grasse		180	60.5	22.6	0	0	0	0	10	6.8	2.8	0.4	191	75.7	0.46	801	15	275	210	183	0.02	0.1	0.05	0.63	10	30	0.00626139	3.7322	0.000786152	0	0	0	0	0.000347855	0.000236541	9.73994e-05	1.39142e-05	0.00664403	0.00263326	1.60013e-05	0.0278632	0.000521783	0.00956601	0.00730496	0.00636575	6.9571e-07	3.47855e-06	1.73928e-06
12814	Fromage de chèvre à pâte molle non pressée non cuite croûte naturelle, au lait pasteurisé		281	54.7	19.3	0	0	0	0	22.6	17.4	4.25	0.7	191	75.7	0.46	624	17.1	241	140	90	0.02	0.22	0.05	0.63	10	30	0.118565	3.3744	0.00814346	0	0	0	0	0.00953586	0.00734177	0.00179325	0.000295358	0.0805907	0.0319409	0.000194093	0.263291	0.00721519	0.101688	0.0590717	0.0379747	8.43881e-06	9.28269e-05	2.1097e-05
12819	Fromage de chèvre à tartiner, nature		163	72.9	10.8	2.41	2.41	0	0	12.2	8.08	2.77	0.45	84.9	55.5	0.21	369	9.73	101	93	78.1	0.014	0.14	0.07	0.37	4	32.9	0.0951481	4.49715	0.00630429	0.00140679	0.00140679	0	0	0.00712151	0.00471654	0.00161693	0.000262679	0.0495587	0.032397	0.000122583	0.215397	0.0056797	0.0589568	0.0542869	0.0455894	8.17223e-06	8.17223e-05	4.08611e-05
12820	Fromage de chèvre à pâte molle et croûte fleurie type camembert		294	51.7	19.9	0	0.025	0	0	23.8	16	5.14	0.85	176	75.7	0.4	400	32	326	153	534	0	0.32	0.05	2.4	10.7	26.7	0.157428	3.18933	0.0106558	0	1.33867e-05	0	0	0.0127441	0.00856749	0.0027523	0.000455148	0.0942423	0.0405349	0.000214187	0.214187	0.017135	0.174563	0.0819266	0.28594	0	0.00017135	2.67734e-05
12824	Fromage de brebis à pâte molle et croûte fleurie		277	55.6	16.8	0	0	0	0	23.3	16.2	5.8	0.73	198	75.7	0.46	676	17.1	364	140	487	0.02	0.22	0.05	0.63	10	30	0.0204705	3.42992	0.00124153	0	0	0	0	0.00172189	0.00119719	0.000428625	5.39476e-05	0.0146324	0.0055943	3.39944e-05	0.049957	0.0012637	0.0268999	0.0103461	0.0359897	1.47802e-06	1.62582e-05	3.69504e-06
12827	Fromage de brebis à pâte pressée		386	38	23.9	0	0	0	0	32.3	21.3	9.5	1.1	263	100	0.52	738	31.6	498	97.6	722	0.027	0.18	0.086	3.46	8.82	20.7	0.800559	2.34419	0.0495683	0	0	0	0	0.0669898	0.0441759	0.0197029	0.00228139	0.545459	0.207399	0.00107847	1.5306	0.065538	1.03285	0.202421	1.49742	5.59977e-05	0.000373318	0.000178363
12828	Fromage de lactosérum de brebis		190	68.7	10.1	4.3	2.07	0	0	14.8	9.86	3.35	0.5	140	55.5	0.35	253	21.7	158	111	216	0.014	0.25	0.05	0.24	6.85	21	0.00444007	4.23805	0.000236025	0.000100486	4.83734e-05	0	0	0.000345858	0.000230416	7.82855e-05	1.16844e-05	0.00327163	0.00129697	8.17908e-06	0.00591231	0.000507103	0.00369227	0.00259394	0.00504766	3.27163e-07	5.8422e-06	1.16844e-06
12830	Chabichou (fromage de chèvre)		296	50.4	20.5	0	0.25	0	0	23.8	17.1	4.06	0.78	162	0	0.31	742	14.1	194	238	104	0.02	0.35	0.1	0.52	11.5	30	0.0272372	3.10914	0.00188636	0	2.30044e-05	0	0	0.00219001	0.0015735	0.000373591	7.17736e-05	0.0149068	0	2.85254e-05	0.0682769	0.00129745	0.0178514	0.0219001	0.00956981	1.84035e-06	3.22061e-05	9.20174e-06
12831	Pélardon (fromage de chèvre)		345	43.6	23.8	0	0	0	0	27.8	18.6	6.05	1.05	202	75.7	0.58	572	20.5	242	140	147	0.02	0.37	0.05	0.57	9.5	30	0.0170097	2.68965	0.00117342	0	0	0	0	0.00137064	0.000917045	0.000298286	5.17687e-05	0.00995931	0.00373228	2.8596e-05	0.0282016	0.00101072	0.0119315	0.00690249	0.00724762	9.8607e-07	1.82423e-05	2.46518e-06
12832	Crottin de chèvre, au lait cru		386	41.4	23.2	0	0	0	0	32.6	24.1	5.5	0.79	201	75.7	1.05	405	18.7	239	140	141	0.02	0.4	0.05	0.57	12	30	0.271095	2.55393	0.0162938	0	0	0	0	0.0228956	0.0169259	0.00386275	0.000554831	0.141166	0.0531655	0.000737434	0.284439	0.0131334	0.167854	0.0983245	0.0990269	1.40464e-05	0.000280927	3.51159e-05
12833	Crottin de chèvre, sans précision		342	47.5	22.4	0	0.13	0	0	28	19.6	5.5	0.91	175	75.7	0.44	467	12.7	186	238	107	0.02	0.22	0.05	0.59	13	30	0.353331	2.93024	0.0231421	0	0.000134307	0	0	0.0289277	0.0202494	0.00568222	0.000940149	0.180798	0.078208	0.000454578	0.482472	0.0131208	0.192162	0.245885	0.110545	2.06626e-05	0.000227289	5.16565e-05
12834	Crottin de Chavignol (fromage de chèvre)		298	50.8	19.7	0	0.25	0	0	24.4	16.2	5.55	0.9	204	75.7	0.54	518	17.2	207	300	147	0.02	0.28	0.05	0.83	11	30	0.493236	3.13381	0.0326065	0	0.000413788	0	0	0.0403857	0.0268135	0.0091861	0.00148964	0.337651	0.125295	0.000893782	0.857369	0.0284686	0.342617	0.496546	0.243307	3.31031e-05	0.000463443	8.27576e-05
12836	Picodon (fromage de chèvre)		317	49.4	20.7	0	0.25	0	0	26	19.2	4.25	0.87	180	75.7	0.44	500	16.9	203	140	126	0.02	0.28	0.05	0.67	13	20	0.106765	3.04745	0.0069717	0	8.41993e-05	0	0	0.00875673	0.00646651	0.00143139	0.000293014	0.0606235	0.0254956	0.000148191	0.168399	0.00569187	0.0683698	0.0471516	0.0424365	6.73594e-06	9.43032e-05	1.68399e-05
12839	Pouligny Saint-Pierre (fromage de chèvre)		296	52.7	18.9	0	0	0	0	24.5	16.8	5.4	0.8	155	75.7	0.29	432	14.8	189	140	100	0.02	0.33	0.05	0.53	14	30	0.31455	3.25102	0.0200844	0	0	0	0	0.0260354	0.0178528	0.00573841	0.000850135	0.164714	0.080444	0.000308174	0.459073	0.0157275	0.200844	0.148774	0.106267	2.12534e-05	0.000350681	5.31334e-05
12845	Selles-sur-Cher (fromage de chèvre)		292	53.1	19.2	0	0	0	0	23.9	18	3.66	0.76	191	75.7	0.6	562	17.1	241	140	167	0.02	0.22	0.05	0.63	10	56	0.0897059	3.2757	0.00589847	0	0	0	0	0.00734237	0.00552982	0.0011244	0.000233481	0.0586775	0.0232559	0.000184327	0.172653	0.00525333	0.0740381	0.0430097	0.0513044	6.14424e-06	6.75866e-05	1.53606e-05
12846	Chevrot (fromage de chèvre)		279	55.4	18.5	0	0	0	0	22.8	15.5	4.85	0.79	140	75.7	0.34	449	12.9	160	140	98.4	0.02	0.26	0.05	0.28	10	30	0.213055	3.41758	0.0141273	0	0	0	0	0.0174109	0.0118364	0.00370364	0.000603273	0.106909	0.0578073	0.000259636	0.342873	0.00985091	0.122182	0.106909	0.0751419	1.52727e-05	0.000198546	3.81818e-05
12847	Rocamadour (fromage de chèvre)		275	57.2	17.9	0	0.07	0	0	22.6	17.1	4.32	0.74	168	0	0.39	373	13.8	197	160	102	0.02	0.2	0.1	0.37	4	30	0.052073	3.52862	0.00338948	0	1.32549e-05	0	0	0.00427945	0.00323799	0.000818019	0.000140124	0.0318118	0	7.38489e-05	0.0706299	0.00261312	0.0373032	0.030297	0.0193143	3.78712e-06	3.78712e-05	1.89356e-05
12848	Valençay (fromage de chèvre)		307	51.8	19.3	0	0	0	0	25.5	18	5	0.91	166	75.7	0.32	509	15.3	181	150	120	0.02	0.19	0.05	0.55	9	40	0.101874	3.1955	0.00640446	0	0	0	0	0.00846185	0.00597307	0.00165919	0.000301972	0.055085	0.0251201	0.000106188	0.168905	0.00507711	0.0600626	0.0497756	0.0398205	6.63675e-06	6.30491e-05	1.65919e-05
13000	Abricot, dénoyauté, cru		45.9	87.1	0.81	9.01	6.7	0.18	1.7	0.25	0.005	0.005	0.005	0	2350	0.7	2.5	8.4	22	260	15	0.07	0.19	0.06	0.09	10	10	1.23169	5.37313	0.0217357	0.241776	0.179789	0.00483016	0.0456181	0.00670855	0.000134171	0.000134171	0.000134171	0	63.0604	0.0187839	0.0670855	0.225407	0.590353	6.97689	0.402513	0.00187839	0.0050985	0.00161005
13001	Abricot, dénoyauté, sec		239	24.7	2.88	59.1	34.3	0.18	8.3	0.5	0.19	0.12	0.15	0	2160	5.52	2.5	41	79	1400	71	0.27	1.4	0.45	0.35	10	10	0.158409	1.52372	0.00190886	0.0391714	0.022734	0.000119304	0.00550123	0.000331399	0.000125932	7.95359e-05	9.94198e-05	0	1.43165	0.00365865	0.001657	0.0271748	0.0523611	0.927918	0.0470587	0.000178956	0.000927918	0.000298259
13002	Ananas, pulpe, cru		54.4	85.5	0.25	11.7	10.5	0.18	1.2	0.25	0.005	0.005	0.005	0	66.9	0.04	2.5	15	8.1	140	8	0.84	0.17	0.06	0.08	10	10	1.02761	5.27443	0.00472248	0.221012	0.198344	0.00340018	0.0226679	0.00472248	9.44495e-05	9.44495e-05	9.44495e-05	0	1.26373	0.000755596	0.0472248	0.283349	0.153008	2.64459	0.151119	0.0158675	0.00321128	0.00113339
13004	Avocat, pulpe, cru		205	70.3	1.56	0.83	0.4	0.18	3.6	20.6	4.51	12.3	2.83	0	2.5	2.23	6	21	38	430	9.4	0.2	0.34	0.18	0.43	10	10	5.78587	4.33675	0.0440291	0.0234257	0.0112895	0.00508028	0.101606	0.58141	0.127289	0.347152	0.0798733	0	0.0705594	0.062939	0.169343	0.592699	1.0725	12.1362	0.265303	0.00564475	0.00959608	0.00508028
13005	Banane, pulpe, crue		90.5	75.8	1.06	19.7	15.6	3.8	2.7	0.25	0.005	0.005	0.005	0	28.5	0.04	2.5	28	29	320	5.1	0.36	0.2	0.06	0.14	10	10	11.3654	4.67604	0.133119	2.47401	1.95911	0.47722	0.339077	0.031396	0.000627921	0.000627921	0.000627921	0	3.57915	0.00502337	0.31396	3.51636	3.64194	40.1869	0.640479	0.0452103	0.0251168	0.00753505
13007	Cassis, cru		71.3	80.5	1.33	9.68	9.68	0	5.8	0.86	0.14	0.071	0.46	0	100	2.1	2.5	23	53.5	330	57.1	0.28	1.17	0.093	0.28	1.1	1.5	0.0161171	4.96598	0.000300641	0.00218813	0.00218813	0	0.00131107	0.0001944	3.16464e-05	1.60493e-05	0.000103981	0	0.0226046	0.000474697	0.000565115	0.00519906	0.0120935	0.0745952	0.0129072	6.32929e-05	0.000264474	2.10223e-05
13008	Cerise, dénoyautée, crue		82.06	80.09	0.71	18.79	17.42		1.4	0.14	0.026	0.031	0.035	0	88	0.21	1	8	14	121	10	0.06	0.34	0.07	0.07	0	10	1.92782	4.94069	0.0166799	0.441429	0.409244	0	0.0328899	0.00328899	0.000610812	0.000728276	0.000822247	0	2.06736	0.00493348	0.0234928	0.187942	0.328899	2.84263	0.234928	0.00140957	0.00798754	0.00164449
13009	Citron, pulpe, cru		27.6	91.3	0.25	1.56	0.8	0	0.25	0.25	0.005	0.005	0.005	0	2.5	0.04	2.5	7.9	12	140	11	0.02	0.15	0.04	0.33	10	10	0.127415	5.63223	0.00115412	0.00720174	0.0036932	0	0.00115412	0.00115412	2.30825e-05	2.30825e-05	2.30825e-05	0	0.0115412	0.00018466	0.0115412	0.0364703	0.055398	0.64631	0.0507815	9.23299e-05	0.000692475	0.00018466
13011	Datte, pulpe et peau, sèche		287	22.9	1.81	64.7	64.7	0	7.3	0.25	0.075	0.1	0.021	0	89	0.46	39	47.3	62	696	44.9	0.3	0.9	0.22	0.23	3.05	1.4	0.729208	1.41268	0.00459884	0.164389	0.164389	0	0.0185478	0.000635198	0.00019056	0.000254079	5.33567e-05	0	0.226131	0.00116877	0.099091	0.12018	0.157529	1.76839	0.114082	0.000762238	0.00228671	0.000558975
13012	Figue, crue		69.4	80.2	1.19	13.5	12.2	0.18	4.1	0.25	0.005	0.005	0.005	0	73.6	0.04	5	22	21	230	57	0.06	0.27	0.08	0.16	10	10	0.336062	4.94748	0.00576245	0.0653723	0.0590772	0.000871631	0.0198538	0.0012106	2.4212e-05	2.4212e-05	2.4212e-05	0	0.3564	0.000193696	0.024212	0.106533	0.10169	1.11375	0.276016	0.000290544	0.00130745	0.000387391
13013	Figue, sèche		258	30.1	2.99	54.3	49.2	5.07	9.72	0.87	0.35	0.18	0.27	0	6	0.35	86.3	52.5	75.1	845	167	0.4	2.12	0.27	0.51	1.1	1.1	0.270079	1.85685	0.00312999	0.0568422	0.0515035	0.00530737	0.0101751	0.000910732	0.000366386	0.000188427	0.000282641	0	0.00628091	0.000366386	0.0903404	0.054958	0.0786161	0.884562	0.174819	0.000418727	0.00221926	0.000282641
13014	Fraise, crue		38.6	90.3	0.63	6.03	5.6	0.18	3.8	0.25	0.005	0.005	0.005	0	2.5	0.3	2.5	12	23	140	18	0.26	0.19	0.02	0.11	10	10	1.83988	5.57054	0.0300291	0.287422	0.266926	0.00857975	0.181128	0.0119163	0.000238326	0.000238326	0.000238326	0	0.119163	0.0142996	0.119163	0.571983	1.0963	6.67314	0.857975	0.012393	0.0090564	0.000953306
13015	Framboise, crue		49.2	86.8	1.19	5.83	5.4	0.18	4.3	0.8	0.13	0.16	0.43	0	100	0.88	2.5	20	29	170	16	0.44	0.4	0.04	0.24	10	10	0.404549	5.35463	0.00978482	0.0479374	0.0444017	0.00148006	0.0353569	0.00657803	0.00106893	0.00131561	0.00353569	0	0.822254	0.00723583	0.0205563	0.164451	0.238454	1.39783	0.131561	0.00361792	0.00328901	0.000328901
13016	Fruit de la passion ou maracudja, pulpe et pépins, cru		101	73.6	2.13	10.9	8.5	1.2	6.8	3	0.54	0.49	1.82	0	1010	0.5	2.5	26	46	240	8.1	0.19	0.56	0.15	0.76	10	10	0.0172242	4.54033	0.000363244	0.00185885	0.00144957	0.000204644	0.00115965	0.000511611	9.209e-05	8.35632e-05	0.000310377	0	0.172242	8.52685e-05	0.000426343	0.00443396	0.0078447	0.0409289	0.00138135	3.2402e-05	9.55008e-05	2.55806e-05
13018	Grenade, pulpe et pépins, crue		80.6	79.4	1.44	14.3	13.3	0.18	2.3	1.2	0.07	0.07	0.96	0	12.1	0.04	2.5	12	27	230	9.5	0.1	0.17	0.11	0.22	10	10	0.0886988	4.89813	0.00158469	0.0157369	0.0146364	0.000198087	0.00253111	0.00132058	7.70337e-05	7.70337e-05	0.00105646	0	0.0133158	4.40193e-05	0.0027512	0.0132058	0.029713	0.253111	0.0104546	0.000110048	0.000187082	0.000121053
13019	Groseille, crue		68.5	82.1	1.56	7.06	6.63	0.18	4.6	0.7	0.21	0.11	0.38	0	25.6	1.19	2.5	12	38	230	38	0.13	0.35	0.09	0.15	10	10	0.0216787	5.06469	0.000493705	0.00223433	0.00209825	5.6966e-05	0.0014558	0.000221534	6.64603e-05	3.48125e-05	0.000120261	0	0.00810183	0.000376608	0.000791194	0.00379773	0.0120261	0.0727898	0.0120261	4.11421e-05	0.000110767	2.8483e-05
13020	Groseille à maquereau, crue		39.9	87.9	0.75	4.88	4.66	0.094	4.03	0.59	0.058	0.059	0.31	0	37	0.69	1.5	9	26.2	187	25.4	0.16	0.33	0.063	0.14	0.068	0.3	0.00197746	5.42248	3.71703e-05	0.000241855	0.000230951	4.65867e-06	0.000199728	2.92406e-05	2.8745e-06	2.92406e-06	1.53637e-05	0	0.00183373	3.41967e-05	7.43406e-05	0.000446043	0.00129848	0.00926779	0.00125883	7.92966e-06	1.63549e-05	3.1223e-06
13021	Kiwi, pulpe et graines, cru		60.5	83.5	0.88	11	8.9	0.18	2.4	0.6	0.13	0.16	0.25	0	38	0.96	2.5	12	26	290	29	0.05	0.16	0.15	0.12	10	10	2.45714	5.15105	0.0357402	0.446753	0.361464	0.0073105	0.0974733	0.0243683	0.0052798	0.00649822	0.0101535	0	1.54333	0.0389893	0.101535	0.487367	1.05596	11.778	1.1778	0.00203069	0.00649822	0.00609208
13023	Litchi, pulpe, cru		81	80.5	1.13	16.1	15.7	0.18	2	0.25	0.005	0.005	0.005	0	2.5	0.04	2.5	18	27	200	3.6	0.1	0.26	0.2	0.23	10	10	0.0246722	4.96598	0.000344192	0.00490397	0.00478214	5.4827e-05	0.000609189	7.61487e-05	1.52297e-06	1.52297e-06	1.52297e-06	0	0.000761487	1.21838e-05	0.000761487	0.0054827	0.00822405	0.0609189	0.00109654	3.04595e-05	7.91946e-05	6.09189e-05
13025	Mangue, pulpe, crue		73.9	81.1	0.63	14.3	12.9	1.1	1.6	0.25	0.005	0.005	0.005	0	864	2.05	2.5	11	12	150	12	0.07	0.09	0.07	0.11	10	10	0.820572	5.003	0.0069954	0.158785	0.143239	0.0122142	0.0177661	0.00277595	5.55191e-05	5.55191e-05	5.55191e-05	0	9.5937	0.0227628	0.0277595	0.122142	0.133246	1.66557	0.133246	0.000777267	0.000999343	0.000777267
13026	Melon cantaloup (par ex.: Charentais, de Cavaillon) pulpe, cru		62.7	84.2	1.13	14.8	10.6	0.18	1.3	0.25	0.005	0.005	0.005	0	2500	0.04	24	16	17	380	11	0.04	0.21	0.06	0.18	10	10	3.75849	5.19423	0.0677367	0.887171	0.635406	0.0107899	0.0779272	0.014986	0.00029972	0.00029972	0.00029972	0	149.86	0.00239776	1.43866	0.959103	1.01905	22.7787	0.659384	0.00239776	0.0125882	0.00359664
13028	Myrtille, crue		57.7	84.2	0.87	10.6	9.96	0.03	2.4	0.33	0.028	0.047	0.15	0	32	0.57	1	6	12	77	6	0.34	0.28	0.057	0.16	0	0.5	0.0416401	5.19423	0.000627848	0.00764965	0.00718778	2.16499e-05	0.001732	0.000238149	2.02066e-05	3.39182e-05	0.00010825	0	0.0230933	0.000411349	0.000721665	0.00432999	0.00865998	0.0555682	0.00432999	0.000245366	0.000202066	4.11349e-05
13029	Mûre (de ronce), crue		47.3	86.1	1.13	6.53	6.1	0.18	5.2	0.7	0.07	0.15	0.43	0	156	1.28	2.5	20	25	200	31	1.1	0.4	0.07	0.18	10	10	0.0697637	5.31144	0.00166666	0.00963122	0.00899701	0.000265485	0.00766958	0.00103244	0.000103244	0.000221238	0.000634215	0	0.230087	0.0018879	0.0036873	0.0294984	0.036873	0.294984	0.0457225	0.00162241	0.000589968	0.000103244
13030	Nectarine ou brugnon, pulpe et peau, crue		46.3	87.8	0.69	9.8	7.6	0.18	1	0.25	0.005	0.005	0.005	0	130	0.5	2.5	6.7	17	190	4.2	0.04	0.11	0.06	0.09	10	10	1.46213	5.41632	0.0217898	0.309479	0.240004	0.00568431	0.0315795	0.00789487	0.000157897	0.000157897	0.000157897	0	4.10533	0.0157897	0.0789487	0.211583	0.536851	6.0001	0.132634	0.00126318	0.00347374	0.00189477
13032	Olive noire, en saumure		173	74.9	1.38	0.05	0	0	6.2	17.2	2.08	10.2	1.51	0	265	6.1	706	16	7.9	19	80	0.07	8.5	0.18	0.14	25	10	0.706843	4.62052	0.0056384	0.00020429	0	0	0.0253319	0.0702757	0.00849846	0.0416751	0.00616955	0	1.08274	0.0249234	2.88457	0.0653728	0.0322778	0.0776301	0.326864	0.000286006	0.0347293	0.000735443
13033	Olive verte, en saumure		155	75.8	1.31	0	0	0.18	3.6	15.7	2.33	11.1	1.51	0	26.5	5.23	1260	24	6.7	31	58	0.03	0.16	0.11	0.07	10	10	0.810782	4.67604	0.00685241	0	0	0.000941553	0.0188311	0.0821243	0.0121879	0.0580624	0.00789858	0	0.138617	0.0273573	6.59087	0.12554	0.0350467	0.162156	0.303389	0.000156925	0.000836936	0.000575393
13034	Orange, pulpe, crue		45.5	87.3	0.75	8.03	7.6	0.18	2.7	0.25	0.005	0.005	0.005	0	2.5	0.19	2.5	15	38	180	66	0.02	0.57	0.04	0.25	10	10	6.37432	5.38547	0.105071	1.12496	1.06472	0.0252171	0.378256	0.0350237	0.000700474	0.000700474	0.000700474	0	0.350237	0.026618	0.350237	2.10142	5.32361	25.2171	9.24626	0.0028019	0.0798541	0.0056038
13035	Papaye, pulpe, crue		42.2	88.8	0.75	8.53	8.1	0.18	1.8	0.15	0.005	0.005	0.005	0	351	0.04	2.5	18	8.7	200	22	0.04	0.16	0.005	0.025	10	10	0.000689083	5.478	1.22467e-05	0.000139286	0.000132265	2.93922e-06	2.93922e-05	2.44935e-06	8.16449e-08	8.16449e-08	8.16449e-08	0	0.00573147	6.53159e-07	4.08224e-05	0.000293922	0.000142062	0.0032658	0.000359237	6.53159e-07	2.61264e-06	8.16449e-08
13036	Pastèque, pulpe, crue		38.9	91	0.69	8.33	7.9	0.18	0.5	0.25	0.005	0.005	0.005	0	1220	0.04	2.5	11	9.7	100	6	0.02	0.16	0.03	0.09	10	10	0.300459	5.61372	0.00532948	0.06434	0.0610187	0.0013903	0.00386194	0.00193097	3.86194e-05	3.86194e-05	3.86194e-05	0	9.42314	0.000308956	0.0193097	0.0849628	0.0749217	0.772389	0.0463433	0.000154478	0.00123582	0.000231717
13037	Poire, pulpe et peau, crue		55.4	83.5	0.49	10.9	9.01	0	2.9	0.27	0.067	0.057	0.12	0	14	0.41	1.8	8.23	15.4	132	6.46	0.03	0.072	0.071	0.097	5	0.4	1.72393	5.15105	0.0152478	0.339185	0.280372	0	0.0902418	0.00840182	0.0020849	0.00177372	0.00373414	0	0.43565	0.0127583	0.0560122	0.2561	0.479215	4.10756	0.201021	0.000933536	0.00224049	0.00220937
13038	Compote de pomme		102	72.9	0.23	24.4	20.7	1.25	1.53	0.21	0.017	0.0074	0.051	0	3	0.18	0	5.09	6	104	4.44	0.027	0.11	0.043	0.025	5	0.2	3.83258	4.49715	0.00864208	0.916812	0.777788	0.0469679	0.0574887	0.0078906	0.000638763	0.00027805	0.00191629	0	0.112723	0.00676337	0	0.191253	0.225446	3.90773	0.16683	0.00101451	0.00413317	0.00161569
13039	Pomme, pulpe et peau, crue		53.4	85.4	0.25	11.6	9.35	0.05	1.4	0.25	0.052	0.01	0.15	0	21.4	0.37	1.5	6.47	14.4	119	5.34	0.036	0.099	0.041	0.031	5	0.2	7.76526	5.26826	0.0363542	1.68684	1.35965	0.00727085	0.203584	0.0363542	0.00756168	0.00145417	0.0218125	0	3.11192	0.0538043	0.218125	0.940847	2.094	17.3046	0.776526	0.00523501	0.0143963	0.00596209
13040	Pomelo (dit Pamplemousse), pulpe, cru		39.8	89.3	0.25	8.02	6.6	0.18	0.8	0.25	0.005	0.005	0.005	0	539	0.04	2.5	7.2	17	140	14	0.02	0.06	0.02	0.07	10	10	0.0320847	5.50885	0.000201537	0.00646531	0.00532058	0.000145107	0.000644919	0.000201537	4.03074e-06	4.03074e-06	4.03074e-06	0	0.434514	3.22459e-05	0.00201537	0.00580427	0.0137045	0.112861	0.0112861	1.6123e-05	4.83689e-05	1.6123e-05
13041	Prune Reine-Claude, crue		71.3	80.1	0.94	16.4	10.4	0.18	1.7	0.25	0.005	0.005	0.005	0	430	1.2	2.5	9.5	20	250	13	0.08	0.16	0.1	0.12	10	10	0.62595	4.94131	0.00825235	0.143977	0.0913026	0.00158024	0.0149245	0.00219477	4.38955e-05	4.38955e-05	4.38955e-05	0	3.77501	0.0105349	0.0219477	0.0834014	0.175582	2.19477	0.114128	0.000702328	0.00140466	0.00087791
13042	Pruneau, sec		229	34.9	1.63	55.4	38.1	0.18	5.1	0.4	0.16	0.14	0.05	0	14.9	0.41	2.5	30	66	610	50	0.25	0.38	0.23	0.28	10	0.8	0.836519	2.15295	0.00595426	0.202372	0.139176	0.000657526	0.0186299	0.00146117	0.000584467	0.000511409	0.000182646	0	0.0544285	0.0014977	0.0091323	0.109588	0.241093	2.22828	0.182646	0.00091323	0.00138811	0.000840171
13043	Pêche, pulpe et peau, crue		47.2	87.6	0.69	9.48	8.7	0.18	2.1	0.25	0.005	0.005	0.005	0	2.5	0.19	2.5	7.1	18	180	4.1	0.05	0.11	0.06	0.11	10	10	2.71353	5.40398	0.0396682	0.545006	0.500164	0.0103482	0.120729	0.0143725	0.00028745	0.00028745	0.00028745	0	0.143725	0.0109231	0.143725	0.40818	1.03482	10.3482	0.235709	0.0028745	0.00632391	0.0034494
13044	Raisin blanc, à gros grain (type Italia ou Dattier), cru		73.4	80.9	0.75	16.6	15.5	0.18	1	0.25	0.005	0.005	0.005	0	7.54	0.31	2.5	7.6	16	200	12	0.08	0.2	0.19	0.025	10	10	2.19418	4.99066	0.0224201	0.496232	0.463349	0.00538083	0.0298935	0.00747338	0.000149468	0.000149468	0.000149468	0	0.225397	0.00926699	0.0747338	0.227191	0.478296	5.9787	0.358722	0.00239148	0.0059787	0.00567977
13045	Raisin noir, cru		71	84	0.63	15.6	15	0.18	1.4	0.4	0.13	0.016	0.12	0	24	0.4	0.19	6.78	21.8	152	8.98	0.051	0.2	0.078	0.038	1.48	0.4	0.807933	5.1819	0.00716898	0.177518	0.17069	0.00204828	0.0159311	0.00455174	0.00147931	0.000182069	0.00136552	0	0.273104	0.00455174	0.00216207	0.0771519	0.24807	1.72966	0.102186	0.000580346	0.00227587	0.000887588
13046	Raisin, sec		321	16	3	73.2	70.3	0.5	4.2	0.9	0.31	0.34	0.18	0	2.5	1.67	5	35	82	960	54	0.28	1.7	0.38	0.24	10	10	2.29768	0.987028	0.0214736	0.523956	0.503198	0.00357893	0.030063	0.00644208	0.00221894	0.00243368	0.00128842	0	0.0178947	0.0119536	0.0357893	0.250525	0.586945	6.87155	0.386525	0.0020042	0.0121684	0.00271999
13048	Rhubarbe, tige, cuite, sucrée		123	67.8	0.39	29.2	28.7	0.09	2	0.05	0.014	0.01	0.025	0	44	0.19	1	12	8	96	145	0.073	0.21	0.027	0.08	5.15	0.3	0.00137717	4.18253	4.36665e-06	0.000326939	0.000321341	1.00769e-06	2.23931e-05	5.59827e-07	1.56752e-07	1.11965e-07	2.79913e-07	0	0.000492648	2.12734e-06	1.11965e-05	0.000134358	8.95723e-05	0.00107487	0.0016235	8.17347e-07	2.35127e-06	3.02306e-07
13050	Pomme, pulpe, crue		61.67	85.81	0.28	13.6	10.04	0.05	2.4	0.15	0.021	0.005	0.037	0	25	0.18	2	5	10	100	6	0.035	0.13	0.03	0.04	0	0.06286	8.74192	5.29355	0.0396909	1.92784	1.4232	0.00708766	0.340208	0.021263	0.00297682	0.000708766	0.00524487	0	3.54383	0.0255156	0.283506	0.708766	1.41753	14.1753	0.850519	0.00496136	0.0184279	0.0042526
13063	Figue de Barbarie, pulpe et graines, crue		36.8	88.4	0.37	6	1.02	0.18	4.45	0.31	0.01	0.01	0.04	0	60	0.01	4.5	77	17.5	175	118	0.58	0.25	0.019	0.14	10	1.5	0.00349423	5.45333	3.51322e-05	0.000569711	9.68509e-05	1.70913e-05	0.000422536	2.94351e-05	9.49519e-07	9.49519e-07	3.79808e-06	0	0.00569711	9.49519e-07	0.000427284	0.0073113	0.00166166	0.0166166	0.0112043	5.50721e-05	2.3738e-05	1.80409e-06
13066	Kaki, pulpe, cru		68.6	81.8	0.88	14.3	13.9	0.18	3.4	0.15	0.005	0.005	0.005	0	180	0.12	2.5	7.2	13	160	6.9	0.13	0.06	0.03	0.025	10	10	0.4487	5.04618	0.00575592	0.0935337	0.0909173	0.00117735	0.0222388	0.000981122	3.27041e-05	3.27041e-05	3.27041e-05	0	1.17735	0.000784898	0.016352	0.0470939	0.0850306	1.04653	0.0451316	0.000850306	0.000392449	0.000196224
13067	Citron vert ou Lime, pulpe, cru		40.2	86.3	1.13	3.14	2.1	0.18	4.3	0.15	0.005	0.005	0.005	0	12.4	0.45	6	14	24	190	57	0.09	0.2	0.08	0.15	10	10	0.0161428	5.32378	0.000453764	0.0012609	0.000843278	7.2281e-05	0.00172671	6.02342e-05	2.00781e-06	2.00781e-06	2.00781e-06	0	0.00497936	0.000180702	0.00240937	0.00562185	0.00963747	0.0762966	0.022889	3.61405e-05	8.03122e-05	3.21249e-05
13071	Mûre noire (du mûrier), crue		45.1	87.7	1.44	8.1	8.1	0	1.7	0.39	0.027	0.041	0.21	0	9	0.87	10	18	38	194	39	1.1	1.85	0.06	0.12	10	0.4	0.00159433	5.41015	5.09055e-05	0.000286344	0.000286344	0	6.00968e-05	1.37869e-05	9.54479e-07	1.44939e-06	7.42372e-06	0	0.00031816	3.07554e-05	0.000353511	0.000636319	0.00134334	0.00685811	0.00137869	3.88862e-05	6.53995e-05	2.12106e-06
13079	Tamarin, fruit immature, pulpe, cru		287	22.9	1.81	64.7	64.7	0	7.3	0.25	0.075	0.1	0.021	0	89	0.46	39	47.3	62	696	44.9	0.3	0.9	0.22	0.23	3.05	1.4	0.000275694	1.41268	1.7387e-06	6.21513e-05	6.21513e-05	0	7.01243e-06	2.40152e-07	7.20455e-08	9.60607e-08	2.01727e-08	0	8.5494e-05	4.41879e-07	3.74637e-05	4.54367e-05	5.95576e-05	0.000668583	4.31313e-05	2.88182e-07	8.64546e-07	2.11334e-07
13085	Pomme Canada, pulpe, crue		56.3	84.4	0.4	11.6	11	0	1.6	0.1	0.0033	0.004	0.024	0	37	0.27	3.69	3.76	8.61	154	3.59	0.03	0.14	0.035	0.09	0.045	1.12	0.260843	5.20657	0.00185324	0.0537439	0.0509641	0	0.00741295	0.00046331	1.52892e-05	1.85324e-05	0.000111194	0	0.171425	0.00125094	0.0170961	0.0174204	0.039891	0.713497	0.0166328	0.000138993	0.000648633	0.000162158
13089	Banane, pulpe, sèche		355	3	3.89	78.4	47.3	0.34	9.9	1.81	0.7	0.15	0.34	0	101	0.39	3	108	74	1490	22	0.57	1.15	0.39	0.61	6.53	3	0.20302	0.185068	0.00222464	0.0448359	0.0270502	0.000194441	0.00566167	0.00103511	0.00040032	8.57829e-05	0.000194441	0	0.0577605	0.000223036	0.00171566	0.0617637	0.0423196	0.852111	0.0125815	0.000325975	0.000657669	0.000223036
13090	Mandarine, pulpe, crue		47.3	87	0.81	9.17	8.6	0.18	1.7	0.25	0.005	0.005	0.005	0	147	0.21	2.5	9.3	18	140	23	0.02	0.09	0.04	0.1	10	10	6.00648	5.36696	0.102859	1.16447	1.09209	0.0228577	0.215878	0.0317467	0.000634935	0.000634935	0.000634935	0	18.6671	0.0266673	0.317467	1.18098	2.28577	17.7782	2.9207	0.00253974	0.0114288	0.00507948
13100	Prune, crue		51.7	87	0.66	9.92	9.92	0	1.5	0.29	0.038	0.076	0.1	0	190	0.33	3	6	17.8	149	7.29	0.076	0.16	0.06	0.096	0.11	0.4	0.756909	5.36696	0.00966266	0.145233	0.145233	0	0.0219606	0.00424572	0.000556335	0.00111267	0.00146404	0	2.78168	0.00483133	0.0439212	0.0878424	0.260599	2.18142	0.106728	0.00111267	0.00234246	0.000878424
13107	Poire, pulpe, crue		53	85.1	0.3	10.4	10.4	0	2.47	0.1	0.0033	0.004	0.024	0	37	0.29	3	7	13	150	11	0	0.2	0.06	0.1	1	1	2.65718	5.24975	0.0150406	0.521408	0.521408	0	0.123834	0.00501354	0.000165447	0.000200542	0.00120325	0	1.85501	0.0145393	0.150406	0.350948	0.651761	7.52031	0.55149	0	0.0100271	0.00300813
13108	Compote, tout type de fruits		67.3	83.9	0.32	14.9	14.3	0.18	1.4	0.48	0.14	0.0001	0.0001	10.5	23.9	0.37	4.38	4.7	9.6	120	4.7	0.03	0.09	0.04	0.025	25	10	1.56225	5.17573	0.00742822	0.345876	0.331948	0.00417837	0.0324984	0.0111423	0.00324984	2.32132e-06	2.32132e-06	0.243738	0.554795	0.00858888	0.101674	0.109102	0.222846	2.78558	0.109102	0.000696395	0.00208919	0.000928527
13109	Compote, tout type de fruits, allégée en sucres		115	67.8	0.8	25.1	25.1	0	3.46	0.54	0.026	0.13	0.1	0	44	0.45	7.79	14.5	26.9	204	25.6	0.32	0.71	0.074	0.2	0.3	0.88	2.06366	4.18253	0.0143559	0.450415	0.450415	0	0.0620891	0.00969021	0.000466566	0.00233283	0.00179448	0	0.789573	0.00807518	0.13979	0.2602	0.482716	3.66075	0.459388	0.00574235	0.0127408	0.00132792
13111	Pomme, sèche		248	31.8	0.78	57.2	54.6	0	8.7	0.31	0.058	0.012	0.14	0	0	0.53	87	10.5	38	450	22	0.15	1.4	0.12	0.2	0.5	0.8	0.311727	1.96172	0.000980431	0.0718983	0.0686302	0	0.0109356	0.000389659	7.29039e-05	1.50836e-05	0.000175975	0	0	0.000666191	0.109356	0.0131981	0.0477646	0.565633	0.0276532	0.000188544	0.00175975	0.000150836
13112	Raisin, cru		73.2	80.5	0.72	15.7	15.5	0	0.9	0.16	0.054	0.007	0.048	0	39	0.19	2	7	20	191	10	0.071	0.36	0.13	0.07	0.8	0.75	0.166439	4.96598	0.00163711	0.0356981	0.0352433	0	0.00204639	0.000363802	0.000122783	1.59163e-05	0.000109141	0	0.0886767	0.000432015	0.00454753	0.0159163	0.0454753	0.434289	0.0227376	0.000161437	0.000818555	0.000295589
13113	Canneberge ou cranberry, crue		44.4	86.8	0.75	7.6	4.04	0	5.13	0.13	0.011	0.018	0.055	0	36	1.2	8	6	13.5	98.8	11	0.36	0.44	0.061	0.1	0	0.15	0.0092427	5.35463	0.000156127	0.00158208	0.000841002	0	0.00106791	2.7062e-05	2.28986e-06	3.74704e-06	1.14493e-05	0	0.00749408	0.000249803	0.00166535	0.00124901	0.00281028	0.0205671	0.00228986	7.49408e-05	9.15943e-05	1.26983e-05
13118	Pêche, sèche		323	7.5	5	68.9	49.2	0.34	14.3	1	0.092	0.32	0.42	0	14.9	0.46	79	80	120	945	25	0.67	6.8	0.63	0.57	6.53	2.8	0.00532465	0.462669	8.24249e-05	0.00113582	0.000811061	5.6049e-06	0.000235735	1.6485e-05	1.51662e-06	5.2752e-06	6.92369e-06	0	0.000245626	7.58309e-06	0.00130231	0.0013188	0.0019782	0.0155783	0.000412125	1.10449e-05	0.000112098	1.03855e-05
13125	Citron, zeste, cru		51	81.6	1.38	5.4	4.17	0.18	10.6	0.3	0.042	0.012	0.096	0	7	0.25	6	15	12	160	134	0.07	0.9	0.092	0.25	7	10	0.00715459	5.03384	0.000193595	0.000757544	0.000584993	2.52515e-05	0.00148703	4.20858e-05	5.89201e-06	1.68343e-06	1.34675e-05	0	0.000982002	3.50715e-05	0.000841716	0.00210429	0.00168343	0.0224458	0.0187983	9.82002e-06	0.000126257	1.29063e-05
13129	Compote, tout type de fruits, allégée en sucres, rayon frais		67.3	83.9	0.32	14.9	14.3	0.18	1.4	0.48	0.14	0.0001	0.0001	10.5	23.9	0.37	4.38	4.7	9.6	120	4.7	0.03	0.09	0.04	0.025	25	10	0.285016	5.17573	0.0013552	0.0631015	0.0605605	0.0007623	0.005929	0.0020328	0.0005929	4.235e-07	4.235e-07	0.0444675	0.101217	0.00156695	0.0185493	0.0199045	0.040656	0.5082	0.0199045	0.00012705	0.00038115	0.0001694
13131	Olive noire, à l'huile (à la grecque)		332	45.7	2.19	0.05	0.05	0	11.6	33.3	4.02	22.6	5.06	0	12.2	2.57	3380	29	60	320	110	0.28	1.7	0.27	0.62	25	10	0.0926181	2.8192	0.000610945	1.39485e-05	1.39485e-05	0	0.00323605	0.00928971	0.00112146	0.00630473	0.00141159	0	0.00340344	0.000716953	0.942919	0.00809013	0.0167382	0.0892704	0.0306867	7.81116e-05	0.000474249	7.53219e-05
13134	Salade de fruits, crue		75.2	78	0.5	11.4	11.2	0.084	1.23	0.15	0	0.014	0.061	0	35	0.37	0.81	16.4	16.7	203	14.5	0.34	0.29	0.071	0.094	4.9	1.18	3.38976	4.81176	0.0225383	0.513873	0.504858	0.00378643	0.0554442	0.00676149	0	0.000631072	0.00274967	0	1.57768	0.0166783	0.0365121	0.739256	0.752779	9.15055	0.653611	0.015326	0.0130722	0.00320044
13136	Framboise, surgelée, crue		49.3	85.9	1.16	6.43	6.03	0.17	6.05	0.8	0.062	0.061	0.52	0	37	1.4	2.17	17	38	228	29.9	1.2	0.78	0.11	0.34	0.19	0.4	0.00545435	5.29911	0.000128338	0.000711389	0.000667134	1.88081e-05	0.000669347	8.85087e-05	6.85942e-06	6.74879e-06	5.75306e-05	0	0.00409353	0.00015489	0.00024008	0.00188081	0.00420416	0.025225	0.00330801	0.000132763	8.6296e-05	1.21699e-05
13153	Purée de fruits, tout type de fruits, type ""compote sans sucres ajoutés""		58.9	84.2	0.25	13.4	11.3	0.18	1.7	0.15	0.005	0.005	0.005	10.5	31	0.4	2.5	6	11	140	6.2	0.06	0.025	0.05	0.025	10	10	2.53551	5.19423	0.0107619	0.57684	0.48644	0.0077486	0.0731812	0.00645716	0.000215239	0.000215239	0.000215239	0.452001	1.33448	0.0172191	0.107619	0.258287	0.473525	6.02669	0.266896	0.00258287	0.00107619	0.00215239
13157	Petit pot fruit avec banane pour bébé		60	84	0.6	12.4	12	0.18	2.3	0.25	0.0001	0.0001	0.0001	10.5	39.2	0.79	1.46	9.84	14	150	10.3	0.12	0.15	0.058	0.061	0.75	10	0.0839699	5.1819	0.000839699	0.0173538	0.016794	0.00025191	0.00321884	0.000349874	1.3995e-07	1.3995e-07	1.3995e-07	0.0146947	0.0548603	0.0011056	0.00204327	0.0137711	0.019593	0.209925	0.0144148	0.00016794	0.000209925	8.11709e-05
13158	Petit pot fruit sans banane pour bébé		55.2	85.8	0.29	11.9	10.2	0.18	2.07	0.25	0.0001	0.0001	0.0001	10.5	48.4	0.73	0.57	5.79	13	123	6.24	0.061	0.13	0.059	0.051	0.75	10	0.104133	5.29294	0.000547073	0.0224489	0.0192419	0.000339563	0.00390497	0.000471615	1.88646e-07	1.88646e-07	1.88646e-07	0.0198078	0.0913047	0.00137712	0.00107528	0.0109226	0.024524	0.232035	0.0117715	0.000115074	0.00024524	0.000111301
13170	Boisson infantile céréales lactées pour le petit déjeuner dès 12 mois		86.5	81	2.23	12.6	4.7	1.19	1.1	2.78	1.19	0.96	0.51	39	5	0.86	26.5	54.9	48	259	63.3	0.4	5.51	0.24	0.73	1.63	10	0.0763217	4.99683	0.0019676	0.0111174	0.00414696	0.00104997	0.000970565	0.00245288	0.00104997	0.000847038	0.000449989	0.0344109	0.00441166	0.000758805	0.0233818	0.04844	0.0423519	0.228524	0.0558516	0.000352933	0.00486165	0.00021176
13175	Pomme, pulpe, rôtie/cuite au four		93.4	75.6	0.25	21	17.5	0.18	3	0.25	0.04	0.05	0.069	0	2.5	0.47	2.5	5.2	12	150	4.7	0.05	0.1	0.06	0.06	10	10	0.67276	4.66371	0.00180075	0.151263	0.126052	0.00129654	0.021609	0.00180075	0.00028812	0.00036015	0.000497007	0	0.0180075	0.00338541	0.0180075	0.0374556	0.086436	1.08045	0.0338541	0.00036015	0.0007203	0.00043218
13176	Pomme, pulpe, bouillie/cuite à l'eau		53.9	85.5	0.26	11.2	11	0.09	2.4	0.36	0.058	0.014	0.1	0	19	0.05	1	3	8	88	5	0.12	0.19	0.035	0.04	5.15	0.88	0.14709	5.27443	0.000709526	0.0305642	0.0300184	0.000245605	0.00654947	0.00098242	0.000158279	3.82052e-05	0.000272894	0	0.0518499	0.000136447	0.00272894	0.00818683	0.0218316	0.240147	0.0136447	0.000327473	0.000518499	9.55131e-05
13179	Pomelo (dit Pamplemousse) jaune, pulpe, cru		39.8	89.3	0.25	8.02	6.6	0.18	0.8	0.25	0.005	0.005	0.005	0	539	0.04	2.5	7.2	17	140	14	0.02	0.06	0.02	0.07	10	10	0.230764	5.50885	0.00144952	0.0465007	0.0382674	0.00104366	0.00463847	0.00144952	2.89905e-05	2.89905e-05	2.89905e-05	0	3.12517	0.000231924	0.0144952	0.0417463	0.0985675	0.811733	0.0811733	0.000115962	0.000347885	0.000115962
13180	Pomelo (dit Pamplemousse) rose, pulpe, cru		40.8	88.1	0.77	6.2	6.2	0	1.6	0.14	0.021	0.02	0.036	0	686	0.13	0	9	18	135	22	0.022	0.08	0.032	0.07	10	10	0.464107	5.43482	0.00875887	0.070526	0.070526	0	0.0182003	0.00159252	0.000238878	0.000227503	0.000409506	0	7.80336	0.00147877	0	0.102376	0.204753	1.53565	0.250254	0.000250254	0.000910013	0.000364005
13549	Kumquat, sans pépin, cru		66	81.9	1.57	9.6	9.36	0.1	5.45	1.18	0.17	0.27	0.3	0	0	0.15	8	17.5	19	158	65.5	0.14	0.67	0.095	0.13	0	10	0.00196588	5.05235	4.67641e-05	0.000285946	0.000278797	2.9786e-06	0.000162334	3.51475e-05	5.06363e-06	8.04223e-06	8.93581e-06	0	0	4.46791e-06	0.000238288	0.000521256	0.000565935	0.0047062	0.00195099	4.17005e-06	1.99567e-05	2.82967e-06
13614	Pamplemousse chinois, pulpe, cru		39.5	89.1	0.76	8.62	8.22	0.17	1	0.04	0.0013	0.0016	0.0096	0	0	0.29	1	6	17	216	4	0.017	0.11	0.048	0.08	10	10	0.0150594	5.49651	0.00028975	0.00328638	0.00313388	6.48126e-05	0.00038125	1.525e-05	4.95626e-07	6.10001e-07	3.66e-06	0	0	0.000110563	0.00038125	0.0022875	0.00648126	0.0823501	0.001525	6.48126e-06	4.19375e-05	1.83e-05
13742	Melon miel ou melon honeydew, pulpe, cru		27.8	91.9	0.58	4.3	4.3	0	0.75	0.17	0.044	0.015	0.062	0	30	0.035	24.1	9.08	15.8	237	6	0.034	0.34	0.033	0.086	0	0	0.196407	5.66924	0.00409771	0.0303796	0.0303796	0	0.00529876	0.00120105	0.000310861	0.000105975	0.000438031	0	0.21195	0.000247275	0.170267	0.0641503	0.111627	1.67441	0.0423901	0.00024021	0.0024021	0.000233145
13997	Fruits rouges, crus (framboises, fraises, groseilles, cassis)		50.5	84.5	1.11	7.88	7.4	0.013	5.3	0.31	0	0.054	0	0	49.5	0.67	3	16.9	32.6	225	40	0.42	1	0.088	0.22	0.35	1.15	0.0671101	5.21274	0.00147509	0.0104718	0.00983396	1.72759e-05	0.00704324	0.000411963	0	7.17613e-05	0	0	0.0657812	0.000890372	0.00398674	0.0224586	0.0433226	0.299005	0.0531565	0.000558144	0.00132891	0.000116944
14000	Chevreuil, rôti/cuit au four		150	65.2	30.2	0	0	0	0	3.19	1.25	0.88	0.62	0	0	0.29	54	24	226	335	7	0.046	4.47	0.3	2.75	8.9	4	0.14745	4.02214	0.0296865	0	0	0	0	0.00313576	0.00122875	0.000865038	0.000609459	0	0	0.000285069	0.0530819	0.0235919	0.222157	0.329304	0.00688098	4.52179e-05	0.004394	0.000294899
14003	Sanglier, rôti/cuit au four		153	63.9	28.3	0	0	0	0	4.38	1.3	1.71	0.64	0	0	0.38	60	27	134	396	16	0.013	1.12	0.056	3.01	10.3	5	0.332566	3.94194	0.0615139	0	0	0	0	0.00952053	0.00282573	0.00371692	0.00139113	0	0	0.000825982	0.130418	0.0586882	0.291267	0.86076	0.0347782	2.82573e-05	0.00243447	0.000121724
14007	Cerf, rôti/cuit au four		150	65.2	30.2	0	0	0	0	3.19	1.25	0.88	0.62	0	0	0.29	54	24	226	335	7	0.046	4.47	0.3	2.75	10.3	5	0.041572	4.02214	0.00836982	0	0	0	0	0.000884097	0.000346433	0.000243889	0.000171831	0	0	8.03725e-05	0.0149659	0.00665151	0.0626351	0.092844	0.00194002	1.27487e-05	0.00123884	8.31439e-05
15000	Amande (avec peau)		600	4.8	18.8	9.51	4.2	0.18	12.5	51.3	4.11	34.4	10.5	0	7.33	22.3	2.5	270	510	800	260	1.9	3.4	0.96	3.5	10	10	4.69268	0.296108	0.147037	0.0743791	0.0328488	0.00140781	0.0977643	0.401225	0.0321449	0.269047	0.082122	0	0.057329	0.174411	0.0195529	2.11171	3.98878	6.25691	2.0335	0.0148602	0.0265919	0.0075083
15001	Cacahuète ou Arachide		618	1.22	22.9	15	4.22	8.87	8.04	50	8.64	24.7	12.4	0	0	2.5	531	169	244	531	47.4	1.19	1.2	0.68	2.92	4.8	5.7	2.39574	0.0752609	0.0887743	0.0581491	0.0163593	0.0343855	0.0311679	0.19383	0.0334939	0.0957522	0.0480699	0	0	0.00969152	2.05848	0.655147	0.945892	2.05848	0.183751	0.00461316	0.00465193	0.00263609
15002	Cacahuète, grillée, salée		623	1.81	23.4	11.3	2.54	8.72	8.67	51.9	7.93	26.2	9.77	0	0	4.93	8	178	363	634	58	1.79	1.58	0.43	2.77	10	2.5	0.964214	0.111658	0.0362161	0.017489	0.00393115	0.0134959	0.0134185	0.0803254	0.0122732	0.0405496	0.015121	0	0	0.00763014	0.0123816	0.27549	0.561813	0.981239	0.0897663	0.00277037	0.00244536	0.000665509
15004	Noisette		622	7.3	14.4	7.16	4.9	0.18	11.6	56.9	4.75	44.2	5.4	0	15.9	16.3	2.5	160	340	860	120	3.3	3	1.7	2.3	10	10	3.39062	0.450331	0.0784967	0.0390303	0.0267107	0.000981209	0.0632335	0.310171	0.025893	0.240941	0.0294363	0	0.0866735	0.0888539	0.0136279	0.872186	1.8534	4.688	0.654139	0.0179888	0.0163535	0.00926698
15005	Noix, séchée, cerneaux		700	4	13.3	6.88	3	0.18	6.7	67.3	6.45	14.1	43.6	0	20.7	1.67	2.5	140	360	430	75	2.9	2.2	1.1	2.7	10	10	1.57705	0.246757	0.0299639	0.0155001	0.00675877	0.000405526	0.0150946	0.151622	0.0145313	0.0317662	0.0982274	0	0.0466355	0.00376238	0.00563231	0.315409	0.811052	0.968756	0.168969	0.00653347	0.00495643	0.00247821
15006	Noix de coco, amande mûre, fraîche		358	47	3.33	6.22	6.22	0	9	33.5	29.7	1.43	0.37	0	0	0.24	20	32	113	356	14	1.5	2.43	0.44	1.1	10	1.2	0.140274	2.89939	0.00130478	0.00243716	0.00243716	0	0.00352644	0.0131262	0.0116373	0.000560312	0.000144976	0	0	9.40384e-05	0.00783653	0.0125385	0.0442764	0.13949	0.00548557	0.00058774	0.000952139	0.000172404
15007	Noix de coco, amande, sèche		685	2.65	6.62	8.55	6.64	1.84	14	66.3	57.7	3.3	0.73	0	0	0.44	26.6	90	197	647	18.4	2.75	3.46	0.67	1.26	6.8	0.3	0.828963	0.163476	0.00801129	0.0103469	0.00803549	0.0022267	0.0169423	0.0802339	0.0698265	0.00399354	0.00088342	0	0	0.000532472	0.0321904	0.108915	0.238402	0.782976	0.022267	0.00332795	0.00418717	0.00081081
15008	Noix du Brésil		692	3.01	14.8	6.17	2.33	0.25	6.4	66.1	16	21.8	25.5	0	0	5.33	3	367	658	591	150	2	2.47	1.75	4.13	103	0.05	0.371094	0.185685	0.00793669	0.00330874	0.00124949	0.000134066	0.00343208	0.035447	0.0085802	0.0116905	0.0136747	0	0	0.00285828	0.00160879	0.196808	0.352861	0.316931	0.0804394	0.00107253	0.00132457	0.000938459
15009	Pistache, grillée, salée		603	2.09	18.9	15.9	7.57	3.23	9.32	49.5	6.58	24.9	14.6	0	156	1.09	664	105	437	655	98.5	0.65	2.4	1.1	2.3	2.5	6.2	0.214567	0.128931	0.00672525	0.00565775	0.00269366	0.00114934	0.00331637	0.0176137	0.00234138	0.00886025	0.00519516	0	0.05551	0.000387858	0.236273	0.0373625	0.155499	0.233071	0.0350496	0.000231292	0.000854	0.000391417
15010	Sésame, graine		587	3.48	17.6	9.85	0.3	0.4	14.9	49.7	7.09	18.8	21.8	0	5	0.25	2.31	324	605	468	962	1.24	14.6	1.58	5.74	26.5	2.5	4.88406	0.214679	0.146439	0.0819557	0.00249611	0.00332815	0.123974	0.413523	0.0589915	0.156423	0.181384	0	0.0416019	0.00208009	0.0192201	2.6958	5.03383	3.89394	8.0042	0.0103173	0.121477	0.0131462
15011	Tournesol, graine		638	3.38	21.3	10.1	2.62	3.8	6.4	55.5	6.23	10.9	35.6	0	30	42.3	5.5	364	477	578	86.5	1.95	4.9	1.5	3.8	8.41	5	0.0855207	0.20851	0.00285516	0.00135385	0.000351198	0.000509371	0.000857888	0.00743949	0.0008351	0.00146109	0.004772	0	0.00402135	0.0056701	0.000737247	0.0487924	0.0639394	0.077478	0.0115949	0.000261388	0.00065682	0.000201067
15019	Noix de cajou, grillée, salée		606	1.7	17.4	21.3	6.64	10.8	8.4	48.1	8.24	29.1	8.65	0	7.91	1.33	6	260	510	610	39	1.6	5.4	2.2	5	10	2.5	1.3637	0.104872	0.0391558	0.0479321	0.0149422	0.0243036	0.0189028	0.108241	0.0185427	0.0654847	0.0194654	0	0.0178001	0.00299294	0.013502	0.585087	1.14767	1.3727	0.087763	0.00360053	0.0121518	0.00495073
15020	Châtaigne, bouillie/cuite à l'eau		121	68.2	2	23	0.2	22.8	4.5	1.38	0.26	0.48	0.55	0	10	1	27	54	99	715	46	0.85	1.73	0.47	0.25	2.2	0.1	0.175747	4.20721	0.00290491	0.0334064	0.000290491	0.0331159	0.00653604	0.00200439	0.000377638	0.000697178	0.000798849	0	0.0145245	0.00145245	0.0392162	0.0784325	0.143793	1.0385	0.0668129	0.00123459	0.00251274	0.000682653
15021	Châtaigne, grillée		234	40.5	3.17	47.9	10.6	32	5.1	2.2	0.41	0.76	0.87	0	14	0.5	2	33	107	592	29	1.18	0.91	0.51	0.57	10	0.12	0.176129	2.49841	0.00238602	0.0360537	0.00797847	0.024086	0.0038387	0.00165591	0.000308601	0.000572042	0.000654837	0	0.0105376	0.000376343	0.00150537	0.0248386	0.0805374	0.44559	0.0218279	0.00088817	0.000684944	0.00038387
15023	Noix, fraîche		378	41.9	11	9.94	1.3	0.18	3.9	31.8	2.93	4.1	23.3	0	52	1.6	2.5	120	260	390	94	2.7	1.5	0.93	2.2	10	10	0.84986	2.58478	0.0247314	0.0223482	0.0029228	0.000404695	0.0087684	0.0714962	0.00658754	0.00921806	0.0523856	0	0.116912	0.00359729	0.00562077	0.269797	0.58456	0.87684	0.211341	0.00607043	0.00337246	0.00209093
15025	Pignon de pin		685	2.45	13.7	6.31	5.21	1.1	10	65	5.53	19.9	33	0	17	8.47	9	227	527	662	6.2	8.2	4.6	1.2	5.6	2.5	11.2	0.11978	0.151139	0.00239561	0.00110338	0.00091103	0.000192348	0.00174862	0.011366	0.000966986	0.00347975	0.00577044	0	0.00297265	0.00148108	0.00157376	0.0396936	0.0921522	0.115759	0.00108414	0.00143387	0.000804364	0.000209834
15026	Noix de pécan		730	2.57	9.57	5.43	3.64	0.46	8.33	72.6	6.62	40.6	23.1	0	29	1.4	1	123	277	409	69.8	4.27	2.57	1.2	4.61	5.2	2	0.0739488	0.158541	0.000969438	0.000550057	0.000368731	4.65978e-05	0.000843826	0.00735436	0.000670604	0.00411277	0.00234002	0	0.00293769	0.00014182	0.0001013	0.0124599	0.02806	0.0414316	0.00707072	0.00043255	0.00026034	0.00012156
15027	Noix de macadamia		752	1.36	7.91	5.22	4.24	0.98	8.6	75.8	11.8	58.8	1.48	0	8.46	0.54	5	130	188	368	85	4.13	3.69	0.76	1.3	10	2	0.00134247	0.0838974	1.41209e-05	9.31874e-06	7.56924e-06	1.7495e-06	1.53527e-05	0.000135318	2.10654e-05	0.00010497	2.64209e-06	0	1.51028e-05	9.64008e-07	8.926e-06	0.000232076	0.000335617	0.000656953	0.000151742	7.37287e-06	6.58739e-06	1.35675e-06
15028	Cucurbitacées, graine		594	5.23	30.2	4.71	1.4	1.47	6	49.1	8.66	16.2	21	0	9	2.18	7	592	1230	809	46	4.54	8.82	1.34	7.81	10	2.5	0.226098	0.322635	0.0114952	0.0017928	0.000532891	0.000559535	0.00228382	0.0186892	0.00329631	0.00616631	0.00799336	0	0.00342573	0.000829787	0.00266445	0.225337	0.468183	0.307935	0.0175093	0.00172809	0.00335721	0.000510053
15033	Noisette grillée		691	2.52	14.4	5.21	4.26	0.96	9.4	66	4.51	46.6	8.46	0	36	15.3	17.5	173	310	755	123	5.55	4.38	1.75	2.5	10	2.5	0.00725984	0.155457	0.000151291	5.47377e-05	4.47568e-05	1.0086e-05	9.87591e-05	0.000693415	4.73833e-05	0.000489593	8.88832e-05	0	0.000378226	0.000160746	0.00018386	0.00181759	0.00325695	0.00793225	0.00129227	5.83099e-05	4.60175e-05	1.8386e-05
15034	Lin, graine		491	5.93	20.2	6.6	1.55	0	27.3	36.6	3.17	6.51	24.9	0	0	0.31	20.5	372	595	641	228	2.48	10.2	1.22	6.05	28	0.5	0.0475389	0.365817	0.00195578	0.000639016	0.000150072	0	0.0026432	0.00354364	0.000306922	0.000630303	0.00241083	0	0	3.00144e-05	0.00198482	0.0360173	0.0576083	0.062062	0.0220751	0.000240115	0.000987571	0.000118121
15035	Sésame, graine décortiquée		631	3.58	21.1	4.5	0.48	1.84	11.9	56.1	8.1	21.6	23.9	0	40	1.68	29	348	703	419	62.4	1.95	6.36	1.4	7.24	24.4	0.2	0.202888	0.220847	0.00678436	0.0014469	0.000154336	0.000591622	0.00382625	0.018038	0.00260442	0.00694512	0.00768465	0	0.0128613	0.000540176	0.00932447	0.111894	0.226038	0.134723	0.0200637	0.00062699	0.00204495	0.000450147
15037	Cacahuète, grillée		618	1.22	22.9	15	4.22	8.87	8.04	50	8.64	24.7	12.4	0	0	2.5	531	169	244	531	47.4	1.19	1.2	0.68	2.92	4.8	5.7	2.81598	0.0752609	0.104346	0.0683491	0.0192289	0.0404171	0.0366351	0.22783	0.0393691	0.112548	0.0565019	0	0	0.0113915	2.41956	0.770066	1.11181	2.41956	0.215983	0.00542236	0.00546793	0.00309849
15039	Châtaigne ou Marron, appertisé		144	62.7	1.96	28.8	3.9	17.4	4	1.4	0.4	0.65	0.35	0	8.46	0.05	52.1	24.1	51	359	21.1	1.95	0.5	1.1	2.95	10	2.5	0.0750268	3.86792	0.0010212	0.0150054	0.00203198	0.00906574	0.00208408	0.000729428	0.000208408	0.000338663	0.000182357	0	0.00440783	2.6051e-05	0.0271451	0.0125566	0.026572	0.187046	0.0109935	0.00101599	0.00026051	0.000573122
15041	Amande, mondée, émondée ou blanchie		613	4.51	21.4	8.76	4.63	1	9.9	52.5	3.95	33.4	12.4	0	4	23.8	19	268	481	659	236	1.84	3.28	1.03	2.97	10	2.5	0.35571	0.278218	0.0124179	0.00508322	0.00268668	0.000580277	0.00574474	0.0304645	0.00229209	0.0193812	0.00719543	0	0.00232111	0.0138106	0.0110253	0.155514	0.279113	0.382402	0.136945	0.00106771	0.00190331	0.000597685
15044	Pistache, grillée		595	2.43	18.4	18.6	7.74	1.38	10.1	47.4	5.52	23.8	13.5	0	156	2.42	6	115	478	1020	108	1.24	4.1	1.3	2.3	4.7	2.5	0.412875	0.149905	0.0127679	0.0129067	0.00537084	0.000957592	0.00700846	0.0328912	0.00383037	0.016515	0.00936774	0	0.108249	0.00167925	0.00416344	0.0797993	0.331688	0.707785	0.0749419	0.000860445	0.00284502	0.000902079
15047	Chia, graine, séchée		442	5.8	16.5	7.72	4.25	1.84	34.4	30.7	3.33	2.31	23.7	0	8.46	0.5	16	335	860	407	631	2.72	7.72	0.92	4.58	10	2.5	0.0243187	0.357798	0.000907825	0.000424752	0.000233834	0.000101236	0.00189268	0.00168911	0.000183216	0.000127096	0.00130397	0	0.000465467	2.75099e-05	0.000880316	0.0184316	0.047317	0.022393	0.0347174	0.000149654	0.000424752	5.06181e-05
15203	Tahin ou Purée de sésame		621	3.03	17.7	13.8	0.49	1.84	7	53.4	7.48	20.2	23.4	0	40	0.25	75	95	761	437	284	1.46	6.69	1.61	4.62	10	2.5	0.0957788	0.186918	0.00272993	0.00212842	7.55742e-05	0.000283789	0.00107963	0.00823605	0.00115366	0.00311551	0.00360906	0	0.00616933	3.85583e-05	0.0115675	0.0146522	0.117371	0.0673999	0.0438022	0.00022518	0.00103182	0.000248315
16030	Beurre de cacao		591	0.9	10.4	26.9	17.9	4.4	12.8	46.3	28.7	14	1.46	10.5	2.5	0.67	8	200	280	750	62	1.7	11	1.6	3	10	10	5.5643	0.0555203	0.0979166	0.253265	0.16853	0.0414263	0.120513	0.435917	0.270212	0.131811	0.013746	0.0988582	0.0235377	0.00630809	0.0753205	1.88301	2.63622	7.0613	0.583734	0.0160056	0.103566	0.0150641
16080	Matière grasse ou graisse végétale solide (type margarine) pour friture		899	0.17	0.25	0	0	0	0	99.8	94.6	0.4	0.12	10.5	2.5	3.79	2.5	0.025	0.15	0.15	0.1	0.005	0.025	0.005	0.025	10	10	2.17303	0.0104872	0.000604292	0	0	0	0	0.241233	0.228664	0.000966867	0.00029006	0.0253802	0.00604292	0.00916106	0.00604292	6.04292e-05	0.000362575	0.000362575	0.000241717	1.20858e-05	6.04292e-05	1.20858e-05
16128	Huile pour friture, sans précision		900	0.015	0	0	0	0	0	100	9.86	39.5	46	0	2.5	52.8	2.5	0.025	0.15	0.15	0.4	0.005	0.025	0.025	0.025	10	10	1.80186	0.000925339	0	0	0	0	0	0.200207	0.0197404	0.0790818	0.0920953	0	0.00500518	0.105709	0.00500518	5.00518e-05	0.000300311	0.000300311	0.000800829	1.00104e-05	5.00518e-05	5.00518e-05
16129	Huile de palme, sans précision		900	0	0	0	0	0	0	100	84	8.6	1.7	0	0	12.8	0	0	0	0	0	0	0.04	0	0	7.5	5.4	3.96137	0	0	0	0	0	0	0.440152	0.369728	0.0378531	0.00748259	0	0	0.0563395	0	0	0	0	0	0	0.000176061	0
16400	Beurre à 82% MG, doux		753	15.4	0.7	0.9	0.83	0	0	82.9	55.4	19.3	1.82	675	158	2.11	25	2.05	24	28	17.8	0.0018	0.026	0.026	0.083	5	1.5	75.1684	0.950014	0.0698776	0.0898427	0.0828549	0	0	8.27551	5.53032	1.92663	0.181682	67.382	15.7724	0.210631	2.49563	0.204642	2.3958	2.79511	1.77689	0.000179685	0.00259546	0.00259546
16401	Huile de beurre ou Beurre concentré		900	1.5	0.28	0	0	0	0	99.9	61.9	28.7	3.69	824	193	2.8	2	0	3	0.002	4	0	0.004	0.001	0.01	7.9	5	15.9041	0.0925339	0.00494795	0	0	0	0	1.76536	1.09385	0.507165	0.0652069	14.5611	3.41055	0.0494795	0.0353425	0	0.0530138	3.53425e-05	0.070685	0	7.0685e-05	1.76713e-05
16402	Beurre à 80% MG, demi-sel		738	15.3	0.72	0.55	0.39	0	0	81.4	54.9	21.2	2.72	697	158	2.11	762	4.94	24	39	17.8	0.0047	0.13	0.0092	0.052	5	1.5	19.582	0.943845	0.0191043	0.0145936	0.0103482	0	0	2.15985	1.45671	0.562517	0.072172	18.4941	4.19234	0.0559864	20.2188	0.131077	0.636812	1.03482	0.472302	0.000124709	0.0034494	0.000244111
16403	Beurre à 80% MG, salé		732	15.7	0.5	0.68	0	0	0	80.8	52.9	19.7	1.91	887	249	1.77	1010	7.4	24	35	24	0.005	0.23	0.005	0.17	10	10	0.919114	0.968521	0.00062781	0.000853822	0	0	0	0.101454	0.0664223	0.0247357	0.00239823	1.11374	0.312649	0.00222245	1.26818	0.00929159	0.0301349	0.0439467	0.0301349	6.2781e-06	0.000288793	6.2781e-06
16410	Beurre à 60-62% MG, à teneur réduite en matière grasse, doux		550	37.7	0.56	0.7	0.1	0	0	60.6	40.1	14	1.5	660	304	1.38	18	1.8	20	27	18	0.005	0.025	0.005	0.13	10	10	0.638613	2.32568	0.000650224	0.00081278	0.000116111	0	0	0.0703635	0.0465607	0.0162556	0.00174167	0.766335	0.352979	0.00160234	0.0209001	0.00209001	0.0232223	0.0313501	0.0209001	5.80557e-06	2.90279e-05	5.80557e-06
16411	Beurre à 60-62% MG, à teneur réduite en matière grasse, demi-sel		555	37	0.9	0.5	0.5	0	0	61	34.3	15.9	2.05	456	107	1.58	450	5	34	71	48	0.005	1.09	0	0.26	7.9	2	0.375212	2.2825	0.000608452	0.000338029	0.000338029	0	0	0.0412395	0.0231888	0.0107493	0.00138592	0.308282	0.0723382	0.00106817	0.304226	0.00338029	0.022986	0.0480001	0.0324508	3.38029e-06	0.000736903	0
16415	Beurre à 39-41% MG, léger, doux		391	54.1	0.25	3.6	1.26	0	0	41.7	26.2	10.7	1.04	675	249	1.22	178	2.05	20	28	18	0.005	0.1	0.005	0.13	7.9	2	0.55246	3.33739	0.000353235	0.00508659	0.0017803	0	0	0.0589196	0.037019	0.0151185	0.00146946	0.953735	0.351822	0.00172379	0.251503	0.00289653	0.0282588	0.0395623	0.0254329	7.0647e-06	0.000141294	7.0647e-06
16520	Saindoux		896	1	0	0	0	0	0	99.5	41.1	43.3	10.1	9	0	0.5	2	1	3	1	1	0.014	0.08	0.02	0.11	6.9	1.8	0.191538	0.0616892	0	0	0	0	0	0.0212701	0.00878593	0.00925623	0.00215907	0.00192393	0	0.000106885	0.000427539	0.00021377	0.000641309	0.00021377	0.00021377	2.99278e-06	1.71016e-05	4.27539e-06
16530	Lard gras, cru		900	0	0	0	0		0	100	39.2	45.1	11.2	0	0	0.6	0	0	0	0	0	0	0	0	0.11	0.2	0.5	3.69137	0	0	0	0	0	0	0.410153	0.16078	0.184979	0.0459371	0	0	0.00246092	0	0	0	0	0	0	0	0
16550	Graisse de canard		898	0.2	0	0	0	0	0	99.8	33.2	49.3	12.9	0	0	2.7	0	0	0	0	0	0.008	0	0	0	6.9	2	0.439407	0.0123378	0	0	0	0	0	0.0488339	0.0162453	0.0241233	0.00631219	0	0	0.00132116	0	0	0	0	0	3.91454e-06	0	0
16560	Graisse d'oie		898	0.2	0	0	0	0	0	99.8	27.7	56.7	11	144	0	2.7	0	0	0	0	0	0.008	0	0.018	0	6.9	2	0.0047863	0.0123378	0	0	0	0	0	0.000531929	0.00014764	0.000302208	5.86295e-05	0.000767513	0	1.43909e-05	0	0	0	0	0	4.26396e-08	0	9.59391e-08
16616	Matière grasse végétale (type margarine) à 70% MG, doux		631	26.5	0.13	0.24	0.24	0	0	70	29.2	27.2	9.17	2.2	436	25	265	1	5.2	13.5	6.9	0.5	0.5	0.5	0.5	1.5	5	11.6044	1.63476	0.00239077	0.00441373	0.00441373	0	0	1.28734	0.537004	0.500223	0.168641	0.0404592	8.01828	0.459764	4.8735	0.0183906	0.0956309	0.248272	0.126895	0.00919528	0.00919528	0.00919528
16713	Matière grasse laitière à 20% MG, légère, ""à tartiner"", doux		201	73.6	0.25	6.2	1.56	4.3	1.5	19.1	12.1	4.67	0.47	448	732	2	250	2.3	15	48.1	22.7	0.5	0.5	0.5	0.5	5.8	5	0.260476	4.54033	0.000323975	0.00803459	0.00202161	0.00557238	0.00194385	0.0247517	0.0156804	0.00605186	0.000609074	0.580564	0.9486	0.0025918	0.323975	0.00298057	0.0194385	0.0623329	0.029417	0.000647951	0.000647951	0.000647951
16733	Matière grasse végétale (type margarine), à tartiner, à 30-40% MG, légère, doux		366	55.8	1.44	3	1.91	0	0	38.6	17.5	13.8	5.32	566	438	9.1	212	2.5	16	76.8	20.8	0.5	0.5	0.5	0.5	1.5	5	0.108073	3.44226	0.000425205	0.000885843	0.000563987	0	0	0.0113978	0.00516742	0.00407488	0.00157089	0.167129	0.129333	0.00268706	0.0625996	0.000738203	0.0047245	0.0226776	0.00614184	0.000147641	0.000147641	0.000147641
16734	Matière grasse végétale (type margarine), à tartiner, à 30-40% MG, légère, demi-sel		358	51.6	0.9	3.05	1.5	0	0	38	17.3	10.5	3.95	650	457	12.8	650	6.1	46	117	54.3	0.5	0.5	0.5	0.5	3.6	5	0.0852337	3.18317	0.000214275	0.000726153	0.000357124	0	0	0.00904715	0.00411883	0.00249987	0.000940427	0.154754	0.108804	0.00304746	0.154754	0.00145231	0.0109518	0.0278557	0.0129279	0.000119041	0.000119041	0.000119041
16735	Matière grasse végétale (type margarine), à tartiner, à 30-40% MG, légère, doux, aux esters de stérol végétal		548	39.4	0.25	0	0	0	0	60.8	14.6	27.7	15.5	130	592	29.8	127	0.94	5.7	12	6.9	0.005	0.025	0.005	0.025	10	10	0.269133	2.43056	0.00012278	0	0	0	0	0.02986	0.00717033	0.013604	0.00761234	0.0638454	0.290742	0.0146353	0.0623721	0.000461652	0.00279938	0.00589342	0.00338872	2.45559e-06	1.2278e-05	2.45559e-06
16736	Matière grasse végétale (type margarine), à tartiner, à 30-40% MG, légère, doux, riche en oméga 3		349	58.2	0	0	0	0	0	38.8	9	16.8	9.47	508	438	29	120	1	8.9	34.2	7.9	0.5	0.5	0.5	0.5	1.5	5	0.126685	3.59031	0	0	0	0	0	0.0140841	0.00326694	0.00609829	0.00343755	0.184401	0.158991	0.0105268	0.0435592	0.000362993	0.00323064	0.0124144	0.00286765	0.000181497	0.000181497	0.000181497
16737	Matière grasse végétale (type margarine) à 50-63% MG, allégée, doux, riche en oméga 3		521	40.4	0.15	0.18	0.18	0	0	57.8	14.5	26.9	13.9	1	547	23.2	147	1	3.7	13.1	4.3	0.5	0.5	0.5	0.5	1.5	5	4.15897	2.49225	0.0011974	0.00143688	0.00143688	0	0	0.461398	0.115749	0.214734	0.110959	0.00798267	4.36652	0.185198	1.17345	0.00798267	0.0295359	0.104573	0.0343255	0.00399134	0.00399134	0.00399134
16738	Matière grasse végétale (type margarine) à 50-63% MG, allégée, demi-sel		523	36.9	0.2	0.1	0.1	0.25	0	58	25	19	8.46	45	507	15.4	500	1	18	35	13.9	0.5	0.5	0.5	0.5	8.4	5	0.737011	2.27633	0.00028184	0.00014092	0.00014092	0.0003523	0	0.0817335	0.03523	0.0267748	0.0119218	0.0634139	0.714464	0.0217017	0.704599	0.0014092	0.0253656	0.0493219	0.0195879	0.000704599	0.000704599	0.000704599
16739	Matière grasse végétale (type margarine) à 50-63% MG, allégée, doux, aux esters de stérol végétal		548	39.4	0.25	0	0	0	0	60.8	14.6	27.7	15.5	130	592	29.8	127	0.94	5.7	12	6.9	0.005	0.025	0.005	0.025	10	10	0.552111	2.43056	0.000251876	0	0	0	0	0.0612561	0.0147095	0.0279078	0.0156163	0.130975	0.596441	0.0300236	0.127953	0.000947052	0.00574276	0.01209	0.00695177	5.03751e-06	2.51876e-05	5.03751e-06
16740	Matière grasse végétale (type margarine) à 50-63% MG, allégée, demi-sel, riche en oméga 3		491	44.2	0.083	0.12	0.12	0	0	54.5	14.9	25	13.6	0	478	17	550	1	11.5	28.4	10.7	0.5	0.5	0.5	0.5	5.45	5	1.70387	2.72666	0.000288027	0.000416425	0.000416425	0	0	0.189126	0.0517061	0.0867552	0.0471948	0	1.65876	0.0589936	1.90862	0.00347021	0.0399074	0.0985539	0.0371312	0.0017351	0.0017351	0.0017351
16741	Matière grasse végétale (type margarine) à 50-63% MG, allégée, doux		536	40.5	0.25	0.18	0.18	0	0	59.3	18.2	22.6	15.7	38.5	518	18.6	159	1	14	22.5	13.4	0.5	0.5	0.5	0.5	9.4	5	5.60006	2.49841	0.00261197	0.00188062	0.00188062	0	0	0.619559	0.190151	0.236122	0.164032	0.402243	5.412	0.19433	1.66121	0.0104479	0.14627	0.235077	0.140002	0.00522394	0.00522394	0.00522394
16742	Matière grasse végétale (type margarine) à 30-40% MG, légère, demi-sel, aux esters de stérol végétal		325	61.2	0.1	2.5	0.1	0	0	35	7.8	9.3	17.5	0	478	20.9	490	1	11.5	28.4	10.7	0.5	0.5	0.5	0.5	5.45	5	0.0411881	3.77538	1.26733e-05	0.000316831	1.26733e-05	0	0	0.00443564	0.000988514	0.00117861	0.00221782	0	0.0605782	0.00264871	0.062099	0.000126733	0.00145742	0.0035992	0.00135604	6.33663e-05	6.33663e-05	6.33663e-05
17040	Huile d'arachide		900	0.08	0.25	0	0	0	0	99.9	16.2	64.2	15.1	0	2.5	14.2	2.5	0.025	0.15	0.15	1.3	0.09	0.025	0.005	0.06	10	10	3.54052	0.00493514	0.000983479	0	0	0	0	0.392998	0.0637294	0.252557	0.0594021	0	0.00983479	0.0558616	0.00983479	9.83479e-05	0.000590087	0.000590087	0.00511409	0.000354052	9.83479e-05	1.96696e-05
17100	Huile d'avocat		900	0	0	0	0	0	0	100	17.9	65.2	10.5	0	25	45.3	0	0	0	0	0	0	0	0	0	7.5	5.4	0.0547467	0	0	0	0	0	0	0.00608296	0.00108885	0.00396609	0.000638711	0	0.00152074	0.00275558	0	0	0	0	0	0	0	0
17130	Huile de colza		900	0	0	0	0	0	0	100	7.26	59.7	26.9	0	0	27.7	0.56	0.29	0	0.41	1.29	0.00075	0.023	0.0052	0.026	5	0	11.146	0	0	0	0	0	0	1.23845	0.0899112	0.739352	0.333142	0	0	0.34305	0.0069353	0.00359149	0	0.00507763	0.015976	9.28834e-06	0.000284843	6.43992e-05
17180	Huile de lin		900	0	0	0	0	0	0	100	9.19	19.3	66.9	0	0	8.99	0	0	1	0	1	0	0	0	0.07	7.5	5.4	0.0252651	0	0	0	0	0	0	0.00280723	0.000257984	0.000541795	0.00187804	0	0	0.00025237	0	0	2.80723e-05	0	2.80723e-05	0	0	0
17210	Huile de noisette		900	0	0	0	0	0	0	100	8.34	75.4	12.9	0	0	28.6	0	0	0	0	0	0	0	0	0	0	0	0.0564023	0	0	0	0	0	0	0.00626692	0.000522661	0.00472526	0.000808433	0	0	0.00179234	0	0	0	0	0	0	0	0
17220	Huile de noix		900	0	0	0	0	0	0	100	10	16.8	69.6	0	0.004	1.81	0	0	0	0	0	0	0	0	0	2.5	0	0.573308	0	0	0	0	0	0	0.0637009	0.00637009	0.0107017	0.0443358	0	2.54803e-06	0.00115299	0	0	0	0	0	0	0	0
17270	Huile d'olive vierge extra		900	0.1	0.25	0	0	0	0	99.9	15.2	73.1	7.17	0	210	22.3	2.5	0.025	0.15	0.15	0.1	0.005	0.025	0.005	0.025	10	10	89.985	0.00616892	0.0249958	0	0	0	0	9.98833	1.51975	7.30878	0.71688	0	20.9965	2.22963	0.249958	0.00249958	0.0149975	0.0149975	0.00999833	0.000499917	0.00249958	0.000499917
17350	Huile de pépins de raisin		900	0.015	0	0	0	0	0	100	11.4	19.5	64.1	0	2.5	15.7	2.5	0.025	0.15	1.1	0.3	0.005	0.025	0.02	0.025	10	10	0.683878	0.000925339	0	0	0	0	0	0.0759865	0.00866246	0.0148174	0.0487073	0	0.00189966	0.0119299	0.00189966	1.89966e-05	0.00011398	0.000835851	0.000227959	3.79932e-06	1.89966e-05	1.51973e-05
17400	Huile de sésame		900	0	0	0	0	0	0	100	14.9	40.2	40	0	0	1.1	0	0	0	0	0	0.00075	0	0	0	7.5	5.4	0.477874	0	0	0	0	0	0	0.0530971	0.00791147	0.021345	0.0212389	0	0	0.000584068	0	0	0	0	0	3.98228e-07	0	0
17420	Huile de soja		900	0	0	0	0	0	0	100	14.7	22.1	59.1	0	0	6.1	0.56	1.52	0	1.85	1.29	0.013	0.041	0.0039	0.11	5	0.8	0.120246	0	0	0	0	0	0	0.0133607	0.00196402	0.00295271	0.00789617	0	0	0.000815003	7.48199e-05	0.000203083	0	0.000247173	0.000172353	1.73689e-06	5.47789e-06	5.21067e-07
17440	Huile de tournesol		901	0.015	0.25	0	0	0	0	100	11.1	27.6	56.3	0	2.5	57.3	10	0.025	0.15	0.15	0.1	0.005	0.025	0.005	0.025	10	10	22.2635	0.000925339	0.00617745	0	0	0	0	2.47098	0.274279	0.681991	1.39116	0	0.0617745	1.41587	0.247098	0.000617745	0.00370647	0.00370647	0.00247098	0.000123549	0.000617745	0.000123549
17700	Huile combinée (mélange d'huiles)		896	0	0	0	0	0	0	99.5	10.3	40.2	44.4	0	0	63.9	2.42	0.29	0	0.41	1.29	0.00075	0.013	0.0028	0.03	5	0	7.42762	0	0	0	0	0	0	0.824831	0.0853845	0.333248	0.368065	0	0	0.529716	0.0200612	0.00240403	0	0.0033988	0.0106938	6.21732e-06	0.000107767	2.32113e-05
18001	Boisson gazeuse, sans jus de fruit, non sucrée, avec édulcorants		0.84	99.9	0.05	0.16	0.16	0	0	0	0	0	0	0	0	0	12.5	0	3	6	20	0.002	0.05	0.005	0.013	0.001	1	0.022683	6.16276	0.00135018	0.00432056	0.00432056	0	0	0	0	0	0	0	0	0	0.337544	0	0.0810106	0.162021	0.54007	5.4007e-05	0.00135018	0.000135018
18004	Café, non instantané, non sucré, prêt à boire		6.88	97.8	0.25	1.35	0	0.15	0.25	0.018	0.002	0.015	0.001	0	2.5	0.04	2.7	9.2	7.4	150	4.3	0.07	0.025	0.005	0.025	10	10	12.5581	6.03321	0.456325	2.46416	0	0.273795	0.456325	0.0328554	0.0036506	0.0273795	0.0018253	0	4.56325	0.073012	4.92831	16.7928	13.5072	273.795	7.84879	0.127771	0.0456325	0.0091265
18005	Café, poudre soluble		296	4.95	19.4	42.6	0	0	19.1	1.1	0.2	0.041	0.2	0	0	0	39	359	327	3770	151	1.71	4.41	0.12	0.46	10.7	0.5	0.109517	0.305362	0.0071778	0.0157616	0	0	0.0070668	0.000406988	7.39979e-05	1.51696e-05	7.39979e-05	0	0	0	0.0144296	0.132826	0.120987	1.39486	0.0558684	0.000632682	0.00163165	4.43987e-05
18010	Limonade, sucrée		34.1	90.5	0.04	8.45	8.45	0	0	0.02	0	0	0	0	0	0	5.72	0.29	3	3.51	6.52	0.00075	0.0092	0.0029	0.005	5	0.5	0.42057	5.58288	0.000493337	0.104218	0.104218	0	0	0.000246669	0	0	0	0	0	0	0.0705472	0.0035767	0.0370003	0.0432903	0.080414	9.25007e-06	0.000113468	3.5767e-05
18011	Eau de coco		15.1	95.7	0.21	3.33	2.48	0.15	0.25	0.15	0.005	0.005	0.005	0	2.5	0.04	20.4	8.3	7.9	200	14	0.15	0.025	0.005	0.025	10	10	0.0218102	5.90366	0.000303321	0.0048098	0.00358207	0.000216658	0.000361096	0.000216658	7.22192e-06	7.22192e-06	7.22192e-06	0	0.00361096	5.77754e-05	0.0294654	0.0119884	0.0114106	0.288877	0.0202214	0.000216658	3.61096e-05	7.22192e-06
18012	Boisson à l'eau minérale ou de source, aromatisée, sucrée		15.1	96.3	0.086	3.48	3.48	0	0.044	0.086	0	0	0	0	0	0	4.74	2.3	0.001	0.33	11.7	0	0	0.005	0	0.5	1	0.0815015	5.94067	0.000464181	0.0187831	0.0187831	0	0.000237488	0.000464181	0	0	0	0	0	0	0.0255839	0.0124141	5.39745e-06	0.00178116	0.0631502	0	0	2.69873e-05
18013	Tonic ou bitter, non sucré, avec édulcorants		2	99.3	0.05	0.4	0.4	0	0.1	0	0	0	0	0	0	0	50	1.15	3	6	2.26	0	0.02	0.002	0.0082	0.0005	0.4	0.00116732	6.12574	2.9183e-05	0.000233464	0.000233464	0	5.83659e-05	0	0	0	0	0	0	0	0.029183	0.000671208	0.00175098	0.00350195	0.00131907	0	1.16732e-05	1.16732e-06
18014	Tonic ou bitter, sucré, avec édulcorants		26	93.5	0	6.45	6.45	0	0.1	0	0	0	0	0	0	0	0	2	3	5.06	4.63	0.001	0.025	0.0042	0.01	0.5	0.7	0.00457915	5.76794	0	0.00113598	0.00113598	0	1.76121e-05	0	0	0	0	0	0	0	0	0.000352242	0.000528364	0.000891173	0.000815441	1.76121e-07	4.40303e-06	7.39709e-07
18016	Limonade, sucrée, avec édulcorants		12	96.3	0	3	3	0	0	0	0	0	0	0	0	0	6.77	2	3	5.06	4.63	0.001	0.025	0.0042	0.01	0.5	0.7	0.00995735	5.94067	0	0.00248934	0.00248934	0	0	0	0	0	0	0	0	0	0.0056176	0.00165956	0.00248934	0.00419868	0.00384188	8.29779e-07	2.07445e-05	3.48507e-06
18018	Cola, sucré		41.8	90.3	0.093	10.2	10.2	0	0	0.062	0	0	0	0	0	0	6.71	2.44	10	2	1.92	0.0006	0.11	0.0044	0.0082	1.1	0.8	9.46079	5.57054	0.0210491	2.30861	2.30861	0	0	0.0140327	0	0	0	0	0	0	1.51871	0.552256	2.26335	0.452669	0.434562	0.000135801	0.0248968	0.000995872
18019	Boisson gazeuse aux fruits (de 10 à 50% de jus), sucrée		46.6	88.2	0.067	11.3	9.92	0	0	0.028	0	0	0	0	10	0	13.5	2.67	1	26.5	4.63	0.0043	0.025	0.0065	0.014	5	0.4	1.71111	5.44099	0.00246017	0.414925	0.364252	0	0	0.00102813	0	0	0	0	0.36719	0	0.495706	0.0980397	0.036719	0.973053	0.170009	0.000157892	0.000917975	0.000238673
18020	Thé infusé, non sucré		0.063	99.8	0	0	0	0	0	0.007	0.002	0.001	0.004	0	0	0	1.65	2	1	25.5	0.2	0.19	0.015	0.018	0.025	0.05	0.22	0.0117558	6.15659	0	0	0	0	0	0.0013062	0.000373199	0.000186599	0.000746397	0	0	0	0.307889	0.373199	0.186599	4.75828	0.0373199	0.0354539	0.00279899	0.00335879
18021	Boisson plate aux fruits, (à moins de 10% de jus), non sucrée, avec édulcorants		5.35	98.8	0.06	0.96	0.96	0	0.05	0.13	0	0	0	0	0	0	19.9	2	3	5.06	4.63	0.001	0.025	0.0042	0.01	0.5	0.7	0.00818621	6.0949	9.1808e-05	0.00146893	0.00146893	0	7.65067e-05	0.000198917	0	0	0	0	0	0	0.0304497	0.00306027	0.0045904	0.00774247	0.00708452	1.53013e-06	3.82533e-05	6.42656e-06
18022	Tisane infusée, non sucrée		0.87	99.7	0	0.2	0	0	0	0.008	0.002	0.001	0.005	0	0	0	1	1	0	9	2	0.044	0.08	0.015	0.04	5	1	0.385532	6.15042	0	0.0886281	0	0	0	0.00354513	0.000886281	0.000443141	0.0022157	0	0	0	0.443141	0.443141	0	3.98827	0.886281	0.0194982	0.0354513	0.00664711
18023	Boisson plate aux fruits (à moins de 10% de jus), sucrée		19.1	95.3	0.1	4.4	4.38	0	0.1	0.1	0	0	0	0	0	0	6.86	2	3	5.06	4.63	0.001	0.025	0.0042	0.01	0.5	0.7	0.278572	5.87898	0.00145849	0.0641737	0.063882	0	0.00145849	0.00145849	0	0	0	0	0	0	0.100053	0.0291699	0.0437548	0.0737998	0.0675283	1.45849e-05	0.000364623	6.12567e-05
18026	Boisson gazeuse, sans jus de fruit, sucrée		37.1	90.6	0.14	8.67	8.67	0	0	0.078	0	0	0	0	0	0	36.4	1	3	3.5	11.5	0.013	0.12	0.012	0.032	0.029	2.9	1.04398	5.58905	0.00393953	0.243969	0.243969	0	0	0.00219488	0	0	0	0	0	0	1.02428	0.0281395	0.0844185	0.0984882	0.323604	0.000365813	0.00337674	0.000337674
18028	Boisson à l'eau minérale ou de source, aromatisée, non sucrée, sans édulcorant		0.8	99.8	0.06	0.14	0	0	0	0	0	0	0	0	0	0	7.17	5	3	3	2.26	0	0.02	0.002	0.0082	0.0005	0.4	0.0315029	6.15659	0.00236272	0.005513	0	0	0	0	0	0	0	0	0	0	0.282345	0.196893	0.118136	0.118136	0.0889956	0	0.000787572	7.87572e-05
18030	Boisson à l'eau minérale ou de source, aromatisée, non sucrée, avec édulcorants		2.37	99.5	0.086	0.28	0	0	0.067	0.086	0	0	0	0	0	0	4.67	1.15	3	6	2.26	0	0.02	0.002	0.0082	0.0005	0.4	0.0487059	6.13808	0.00176739	0.00575429	0	0	0.00137692	0.00176739	0	0	0	0	0	0	0.0959733	0.0236337	0.0616531	0.123306	0.0464453	0	0.00041102	4.1102e-05
18032	Boisson gazeuse, sans jus de fruit, à teneur réduite en sucres		26.2	93.5	0	6.55	4.03	0	0	0	0	0	0	0	0	0	0	1.97	1	5.06	2.92	0.00075	0.023	0.0035	0.01	0.05	0.5	0.562173	5.76794	0	0.140543	0.0864717	0	0	0	0	0	0	0	0	0	0	0.0422703	0.021457	0.108572	0.0626544	1.60927e-05	0.000493511	7.50995e-05
18035	Limonade, non sucrée, avec édulcorants		0.67	99	0.067	0.1	0.082	0	0	0	0	0	0	0	0	0	8.56	0	0	0	0	0	0	0	0	0	0	0.00180884	6.10724	0.000180884	0.000269977	0.000221381	0	0	0	0	0	0	0	0	0	0.02311	0	0	0	0	0	0	0
18037	Cola, sucré, avec édulcorants		26.7	95	0.0093	6.65	6.65	0	0.0033	0.0033	0	0	0	0	0	0	4.2	0	17	10	0	0	0	0	0	0	0	0.0164783	5.86048	5.73962e-06	0.00410414	0.00410414	0	2.03664e-06	2.03664e-06	0	0	0	0	0	0	0.00259209	0	0.0104918	0.00617163	0	0	0	0
18039	Diabolo (limonade et sirop)		42.8	89.2	0.075	10.6	10.6	0	0.069	0	0	0	0	0	0	0	8.5	2	3	5.06	4.63	0.001	0.025	0.0042	0.01	0.5	0.7	0.505616	5.50268	0.00088601	0.125223	0.125223	0	0.000815129	0	0	0	0	0	0	0	0.100414	0.0236269	0.0354404	0.0597761	0.0546963	1.18135e-05	0.000295337	4.96166e-05
18041	Lait de coco ou Crème de coco		188	75.1	1.77	3.4	2.1	0	0.57	18.4	16.5	0.88	0.2	0	0	0.7	30	46	96	220	18	0.77	3.3	0.22	0.56	3	1	0.212212	4.63286	0.00199795	0.00383787	0.00237045	0	0.000643407	0.0207696	0.018625	0.000993331	0.000225757	0	0	0.000790149	0.0338635	0.0519241	0.108363	0.248333	0.0203181	0.000869164	0.00372499	0.000248333
18049	Boisson gazeuse aux fruits (à moins de 10% de jus), sucrée		40.7	90.5	0.081	9.97	9.74	0	0.005	0.051	0	0	0	0	0	0	9.73	2	3	5.06	4.63	0.001	0.025	0.0042	0.01	0.5	0.7	0.270319	5.58288	0.000537982	0.0662183	0.0646907	0	3.32088e-05	0.000338729	0	0	0	0	0	0	0.0646243	0.0132835	0.0199253	0.0336073	0.0307513	6.64175e-06	0.000166044	2.78954e-05
18051	Boisson gazeuse aux fruits (de 10 à 50% de jus), non sucrée, avec édulcorants		7.25	98	0.073	1.39	1.26	0	0	0.014	0	0	0	0	0	0	6.28	1.99	3	63.7	6.37	0.001	0.025	0.0042	0.01	0.5	0.7	0.0433018	6.04555	0.000436005	0.008302	0.00752556	0	0	8.36173e-05	0	0	0	0	0	0	0.0375083	0.0118856	0.017918	0.380459	0.0380459	5.97266e-06	0.000149317	2.50852e-05
18058	Boisson préparée à partir de sirop à diluer type menthe, fraise, etc, sucré, dilué dans l'eau		31.2	92.2	0.055	7.7	7.7	0	0	0	0	0	0	0	2	0	4.94	2.71	0.5	5.06	7.55	0.001	0.025	0.004	0.01	0	0	6.65713	5.68775	0.0117353	1.64295	1.64295	0	0	0	0	0	0	0	0.426739	0	1.05405	0.578232	0.106685	1.07965	1.61094	0.00021337	0.00533424	0.000853479
18060	Cola, non sucré, avec édulcorants		1.3	99.7	0.081	0.11	0.11	0	0.003	0.053	0	0	0	0	0	0	9.88	2.38	10	6	2.26	0.0006	0.065	0.0068	0.0082	1.1	0.8	0.11723	6.15042	0.0073043	0.00991942	0.00991942	0	0.00027053	0.00477936	0	0	0	0	0	0	0.890944	0.21462	0.901765	0.541059	0.203799	5.41059e-05	0.00586148	0.000613201
18064	Boisson au thé, aromatisée, à teneur réduite en sucres		21.2	94.5	0	5.3	5.3	0	0	0	0	0	0	0	0	0	6.77	2	3	5.06	4.63	0.001	0.025	0.0042	0.01	0.5	0.7	0.32456	5.82963	0	0.08114	0.08114	0	0	0	0	0	0	0	0	0	0.103645	0.0306189	0.0459283	0.0774657	0.0708826	1.53094e-05	0.000382736	6.42996e-05
18065	Boisson au thé, aromatisée, non sucrée, avec édulcorants		1.42	99.5	0.014	0.34	0.32	0	0	0	0	0	0	0	0	0	40.3	2.3	0	0	0	0	0	0	0	0	0	0.00792534	6.13808	7.81372e-05	0.00189762	0.00178599	0	0	0	0	0	0	0	0	0	0.224923	0.0128368	0	0	0	0	0	0
18066	Eau du robinet		0	100	0	0	0	0	0	0	0	0	0	0	0	0	2.4	0.99	0	0.73	7.13	0.00082	0.03	0.017	0.011	0.5	0	0	6.16892	0	0	0	0	0	0	0	0	0	0	0	0	13.4012	5.52798	0	4.07618	39.8126	0.00457873	0.167514	0.0949248
18067	Cola, sucré, sans caféine		43.8	89.6	0	11	11	0	0	0	0	0	0	0	0	0	10	0	11	3	2	0	0.02	0	0.01	0.5	0.7	0.0794776	5.52736	0	0.0199601	0.0199601	0	0	0	0	0	0	0	0	0	0.0181456	0	0.0199601	0.00544367	0.00362911	0	3.62911e-05	0
18068	Cola, non sucré, avec édulcorants, sans caféine		0.87	99.7	0	0.2	0.2	0	0	0	0	0	0	0	0	0	7	0	10	7	3	0	0.02	0.002	0.01	0.0005	0.4	0.0150661	6.15042	0	0.00346346	0.00346346	0	0	0	0	0	0	0	0	0	0.121221	0	0.173173	0.121221	0.051952	0	0.000346346	3.46346e-05
18070	Café décaféiné, non instantané, non sucré, prêt à boire		4.42	98.6	0.1	0.6	0	0	0	0.18	0.047	0.015	0.047	0	0	0	8	42.5	4	84.5	2	0.039	0.09	0.029	0.035	5	1	0.602674	6.08256	0.0136352	0.0818109	0	0	0	0.0245433	0.00640852	0.00204527	0.00640852	0	0	0	1.09081	5.79494	0.545406	11.5217	0.272703	0.00531771	0.0122716	0.00395419
18071	Café expresso, non instantané, non sucré, prêt à boire		7.64	97.8	0.25	1.16	0	0.15	0.25	0.2	0.092	0.015	0.092	0	2.5	0.04	2.82	7.9	6.9	150	3.5	0.05	0.025	0.005	0.025	10	10	2.51638	6.03321	0.0823424	0.382069	0	0.0494054	0.0823424	0.0658739	0.030302	0.00494054	0.030302	0	0.823424	0.0131748	0.928822	2.60202	2.27265	49.4054	1.15279	0.0164685	0.00823424	0.00164685
18072	Café décaféiné, instantané, non sucré, prêt à boire		2.1	98.9	0.12	0.4	0	0	0	0.002	0.001	0	0.001	0	0	0	4	4	3	36	4	0.012	0.04	0.01	0.01	5	1	0.00309109	6.10107	0.000176634	0.000588779	0	0	0	2.9439e-06	1.47195e-06	0	1.47195e-06	0	0	0	0.00588779	0.00588779	0.00441584	0.0529901	0.00588779	1.76634e-05	5.88779e-05	1.47195e-05
18073	Café, instantané, non sucré, prêt à boire		1.64	99.2	0.1	0.3	0	0	0	0.004	0.002	0	0.002	0	0	0	4	4	3	30	4	0.015	0.04	0.006	0.008	0.03	1	0.0682847	6.11957	0.0041637	0.0124911	0	0	0	0.000166548	8.3274e-05	0	8.3274e-05	0	0	0	0.166548	0.166548	0.124911	1.24911	0.166548	0.000624555	0.00166548	0.000249822
18075	Boisson au thé, aromatisée, sucrée		27.3	93.1	0.033	6.76	6.52	0	0	0.011	0	0	0	0	0	0	22.8	1.2	0	12.9	2	0.072	0.0099	0.0027	0.015	5	0.4	2.60798	5.74327	0.00315251	0.645787	0.622859	0	0	0.00105084	0	0	0	0	0	0	2.1781	0.114637	0	1.23234	0.191061	0.0068782	0.000945753	0.000257933
18078	Boisson gazeuse, sans jus de fruit, sucrée, avec édulcorants		27.2	93.2	0	6.8	6.8	0	0	0	0	0	0	0	0	0	0	2	3	5.06	4.63	0.001	0.025	0.0042	0.01	0.5	0.7	0.224505	5.74944	0	0.0561262	0.0561262	0	0	0	0	0	0	0	0	0	0	0.0165077	0.0247616	0.0417645	0.0382153	8.25385e-06	0.000206346	3.46662e-05
18100	Cacao, non sucré, poudre soluble		387	3.5	22.4	11.6	0.9	8.5	29.5	20.6	12.4	6.65	0.62	0	2.5	0.61	45	500	690	3900	140	4.1	48.5	3.9	6.4	10	10	11.4126	0.215912	0.660573	0.342083	0.0265409	0.250664	0.869951	0.607491	0.365674	0.196108	0.0182837	0	0.0737247	0.0179888	1.32704	14.7449	20.348	115.011	4.12858	0.120908	1.43026	0.115011
18142	Thé noir, infusé, sucré		14.4	96.2	0	3.43	2.37	0	0	0	0	0	0	0	2.44	0.0098	4.2	3.45	3.59	52.8	3.78	1.45	0.06	0.029	0.025	9.88	9.77	0.00823753	5.93451	0	0.00196213	0.00135576	0	0	0	0	0	0	0	0.0013958	5.60609e-06	0.00240261	0.00197357	0.00205366	0.0302043	0.00216235	0.000829473	3.4323e-05	1.65895e-05
18143	Thé vert, infusé, sucré		14.4	96.2	0	3.43	2.37	0	0	0	0	0	0	0	2.44	0.0098	4.2	3.45	3.59	52.8	3.78	1.45	0.06	0.029	0.025	9.88	9.77	0.00558712	5.93451	0	0.00133082	0.000919548	0	0	0	0	0	0	0	0.000946707	3.80235e-06	0.00162958	0.00133858	0.0013929	0.0204861	0.00146662	0.000562592	2.32797e-05	1.12518e-05
18144	Thé infusé, sucré		9.52	97.4	0	2.37	2.37	0	0	0.0068	0.002	0.00098	0.0039	0	0	0	1.66	1.99	0.98	25.2	0.28	0.19	0.016	0.018	0.025	0.17	0.22	0.00283281	6.00853	0	0.000705226	0.000705226	0	0	2.02343e-06	5.95128e-07	2.91613e-07	1.1605e-06	0	0	0	0.000493956	0.000592152	0.000291613	0.00749861	8.33179e-05	5.65371e-05	4.76102e-06	5.35615e-06
18146	Café, instantané, sucré, prêt à boire		17.7	95.2	0.096	4.32	4.03	0	0	0.0038	0.0019	0	0.0019	0	0	0	3.93	3.91	2.88	29.3	3.99	0.015	0.041	0.006	0.0085	0.23	0.97	0.0835077	5.87282	0.000452923	0.0203815	0.0190133	0	0	1.79282e-05	8.9641e-06	0	8.9641e-06	0	0	0	0.0185415	0.0184472	0.0135877	0.138236	0.0188246	7.07692e-05	0.000193436	2.83077e-05
18148	Café, allongé, instantané, sucré, prêt à boire		15	95.9	0.097	3.64	3.35	0	0	0.0039	0.0019	0	0.0019	0	0	0	3.94	3.92	2.9	29.4	3.99	0.015	0.041	0.006	0.0084	0.2	0.98	0.480486	5.916	0.00310715	0.116598	0.107309	0	0	0.000124926	6.08616e-05	0	6.08616e-05	0	0	0	0.126208	0.125567	0.092894	0.941753	0.127809	0.000480486	0.00131333	0.000192195
18149	Café expresso, non instantané, sucré, prêt à boire		28	92.7	0.24	6.3	5.2	0.14	0.24	0.19	0.087	0.014	0.087	0	2.37	0.038	2.79	7.57	6.54	143	3.51	0.048	0.028	0.005	0.025	9.74	9.49	0.392474	5.71859	0.00336406	0.0883066	0.072888	0.00196237	0.00336406	0.00266322	0.00121947	0.000196237	0.00121947	0	0.0332201	0.000532643	0.0391072	0.106108	0.0916707	2.00442	0.0491994	0.000672812	0.000392474	7.00846e-05
18153	Chicorée et café, instantané, non sucré, prête à boire (reconstituée avec du lait demi-écrémé standard)		54.1	87	3.74	5.9	5	0.6	0.46	1.62	1	0.47	0.05	17.9	0	0.16	52.2	13.2	3.68	162	117	0	0.37	0	0.5	0.9	10.4	2.28637	5.36696	0.158059	0.249345	0.211309	0.0253571	0.0194405	0.0684643	0.0422619	0.0198631	0.00211309	0.756488	0	0.0067619	2.20607	0.557857	0.155524	6.84643	4.94464	0	0.0156369	0
18154	Thé noir, infusé, non sucré		1.26	99.7	0	0.3	0	0	0	0.007	0.002	0.001	0.004	0	0	0	3	3	1	37	0	0.22	0.02	0.01	0.02	5	7.8	0.572102	6.15042	0	0.136215	0	0	0	0.00317834	0.000908098	0.000454049	0.0018162	0	0	0	1.36215	1.36215	0.454049	16.7998	0	0.0998908	0.00908098	0.00454049
18155	Thé vert, infusé, non sucré		5.1	98.5	0	1.09	0	0	0	0	0	0	0	0	2.5	0.01	4.25	3.49	3.68	53.8	3.78	1.49	0.06	0.03	0.025	10	10	2.17987	6.07639	0	0.465895	0	0	0	0	0	0	0	0	1.06857	0.00427426	1.81656	1.49172	1.57293	22.9955	1.61567	0.636865	0.0256456	0.0128228
18161	Chicorée, instantanée, non sucrée, prête à boire (reconstituée avec du lait demi-écrémé standard)		93.5	85.1	0	7.1	0	0	0.59	7.1	3.15	0.94	3.02	0	0	0.01	50.9	7.9	3.68	84.5	4	0.05	0.06	0.01	0.025	5	7.8	1.89228	5.24975	0	0.143692	0	0	0.0119406	0.143692	0.0637507	0.019024	0.0611197	0	0	0.000202383	1.03013	0.159883	0.074477	1.71014	0.0809533	0.00101192	0.0012143	0.000202383
18162	Chicorée et café, instantané, non sucré, prêt à boire (reconstituée avec de l'eau)		28.7	92.2	0.56	6.06	0.43	0.15	0.6	0.15	0.066	0.02	0.064	0	2.5	0.04	8.93	35	15	160	11	0.1	0.2	0.02	0.025	10	10	5.80774	5.68775	0.113322	1.2263	0.087015	0.0303541	0.121416	0.0303541	0.0133558	0.00404721	0.0129511	0	0.505901	0.00809442	1.80708	7.08261	3.03541	32.3777	2.22596	0.020236	0.0404721	0.00404721
18220	Citron ou Lime, spécialité à diluer pour boissons, sans sucres ajoutés		19.7	93.8	0.25	1.31	0.91	0	0	0	0	0	0	0	2.5	0	1.4	3.2	4.7	44	6.1	0.005	0.05	0.01	0.025	10	10	0.019039	5.78645	0.000241612	0.00126605	0.000879468	0	0	0	0	0	0	0	0.00241612	0	0.00135303	0.00309263	0.00454231	0.0425237	0.00589533	4.83224e-06	4.83224e-05	9.66448e-06
18305	Boisson plate aux fruits (10 à 50% de jus), non sucrée, avec édulcorants		8.37	98	0.1	1.4	1.3	0	0.1	0.1	0	0	0	0	0	0	13.3	2	3	5.06	4.63	0.001	0.025	0.0042	0.01	0.5	0.7	0.0247429	6.04555	0.000295614	0.0041386	0.00384298	0	0.000295614	0.000295614	0	0	0	0	0	0	0.0393167	0.00591228	0.00886842	0.0149581	0.0136869	2.95614e-06	7.39035e-05	1.24158e-05
18309	Boisson plate aux fruits (teneur en jus non spécifiée), sucrée		46.6	88.3	0.1	11.2	10.6	0	0	0.07	0	0	0	0	0	0	0.7	4.6	5	48	13	0.007	0.1	0.02	0.06	0	1	0.112155	5.44716	0.000240675	0.0269556	0.0255116	0	0	0.000168473	0	0	0	0	0	0	0.00168473	0.0110711	0.0120338	0.115524	0.0312878	1.68473e-05	0.000240675	4.81351e-05
18339	Boisson plate aux fruits (10 à 50% de jus), sucrée		42.4	89.3	0.13	10.1	9.76	0	0.041	0.06	0	0	0	0	1	0	28	2.4	5	20.1	2.5	0.05	0.1	0.05	0.05	1.1	1	2.24338	5.50885	0.00687828	0.534389	0.5164	0	0.0021693	0.00317459	0	0	0	0	0.0529098	0	1.48147	0.126984	0.264549	1.06349	0.132275	0.00264549	0.00529098	0.00264549
18340	Boisson gazeuse aux fruits (à moins de 10% de jus), non sucrée, avec édulcorants		3.22	99.2	0.063	0.45	0.43	0	0	0.13	0	0	0	0	0	0	10	0	0	8.3	0	0	0	0	0	0	0	0.00190234	6.11957	3.72197e-05	0.000265855	0.000254039	0	0	7.68026e-05	0	0	0	0	0	0	0.00590789	0	0	0.00490355	0	0	0	0
18341	Boisson gazeuse à la pomme (de 50 à 99% de fruits), non sucrée		30.2	92.2	0	7.5	6.5	0	0	0	0	0	0	0	2	0	0.1	1.94	3	60.3	2.92	0.001	0.1	0.01	0.01	0.05	0.7	0.0242021	5.68775	0	0.00601046	0.00520907	0	0	0	0	0	0	0	0.00160279	0	8.01395e-05	0.00155471	0.00240418	0.0483241	0.00234007	8.01395e-07	8.01395e-05	8.01395e-06
18343	Boisson au jus de fruit et au lait		47.5	87.5	0.56	9.63	9.63	0	1.5	0.3	0.2	0.09	0.005	1	0	0.23	12	8.1	19	68.4	57.4	0.1	0.2	0.05	0.1	0	1	0.134282	5.39781	0.00158311	0.0272238	0.0272238	0	0.00424047	0.000848095	0.000565396	0.000254428	1.41349e-05	0.00282698	0	0.000650206	0.0339238	0.0228986	0.0537127	0.193366	0.162269	0.000282698	0.000565396	0.000141349
18344	Tonic ou bitter, sucré		34.1	88.9	0.068	8.28	7.38	0	0.05	0.066	0	0	0	0	0	0	6.83	2.45	0	1	7.48	0.0011	0.03	0.0029	0.017	1.1	1	0.139935	5.48417	0.00027905	0.0339784	0.0302851	0	0.000205184	0.000270842	0	0	0	0	0	0	0.0280281	0.010054	0	0.00410367	0.0306955	4.51404e-06	0.00012311	1.19006e-05
18350	Boisson diététique pour le sport		22.4	92.6	0.025	5.26	5.26	0	0	0.14	0	0	0	0	0	0	50.2	30.5	0	6.24	0	0	0	0	0	0	0	0.0745643	5.71242	8.32191e-05	0.0175093	0.0175093	0	0	0.000466027	0	0	0	0	0	0	0.167104	0.101527	0	0.0207715	0	0	0	0
18352	Boisson énergisante, sucrée		48.6	88	0.2	11.9	11.7	0	0.1	0	0	0	0	0	0	1.8	46.2	0	0	0	0	0	0	0	0	0	0	0.172649	5.42865	0.000710489	0.0422741	0.0415636	0	0.000355245	0	0	0	0	0	0	0.0063944	0.164123	0	0	0	0	0	0	0
18353	Boisson énergisante, non sucrée, avec édulcorants		4.99	98.7	0.073	0.95	0.45	0	0	0.1	0	0	0	0	0	0	68.3	1.15	3	6	2.26	0	0.02	0.002	0.0082	0.0005	0.4	0.00447231	6.08873	6.54266e-05	0.000851442	0.000403315	0	0	8.96255e-05	0	0	0	0	0	0	0.0612142	0.00103069	0.00268876	0.00537753	0.00202554	0	1.79251e-05	1.79251e-06
18430	Eau embouteillée de source		0	100	0	0	0	0	0	0	0	0	0	0	0	0	2.17	1.81	0.0015	0.99	16.9	0.00089	0.023	0.008	0.011	5	0	0	6.16892	0	0	0	0	0	0	0	0	0	0	0	0	4.08558	3.40779	0.00282413	1.86393	31.8186	0.00167565	0.0433034	0.015062
19021	Lait en poudre, entier		501	2.4	27.4	37.5	37.5	0	0	26.8	17.3	7.22	0.76	228	170	0.68	360	93	810	1190	960	0.061	0.62	0.058	3.91	14	7	3.91551	0.148054	0.214142	0.293077	0.293077	0	0	0.209452	0.135206	0.0564271	0.0059397	1.78191	1.32862	0.00531447	2.81354	0.726831	6.33047	9.30032	7.50278	0.000476739	0.00484554	0.000453293
19023	Lait entier, UHT		65.4	87.5	3.32	4.85	4.2	0	0	3.63	2.4	0.92	0.11	31.4	21.9	0.089	44.2	9.8	97	160	120	0.005	0.01	0.005	0.37	25	10	2.6113	5.39781	0.132562	0.193652	0.167698	0	0	0.144939	0.0958276	0.0367339	0.0043921	1.25374	0.874427	0.00355361	1.76482	0.391296	3.87303	6.38851	4.79138	0.000199641	0.000399282	0.000199641
19024	Lait entier, pasteurisé		56.8	89.1	3.3	3.47	3.37	0.1	0	3.3	2.16	0.85	0.11	38.5	20.2	0.089	79	10.9	93	140	117	0.002	0.04	0.05	0.37	1.1	24.3	0.571432	5.49651	0.0331994	0.0349097	0.0339036	0.00100604	0	0.0331994	0.0217305	0.00855136	0.00110665	0.387326	0.203221	0.000895378	0.794773	0.109659	0.935619	1.40846	1.17707	2.01208e-05	0.000402417	0.000503021
19026	Lait concentré non sucré, entier		123	74.5	6.44	9.91	9.47	0	1.5	5.9	3.96	1.36	0.1	145	14	0.2	95	25.7	225	339	273	0.011	0.06	0.058	0.8	2.1	23	0.0433321	4.59585	0.00226877	0.00349123	0.00333622	0	0.00052844	0.00207853	0.00139508	0.000479119	3.52293e-05	0.0510825	0.00493211	7.04587e-05	0.0334679	0.00905394	0.079266	0.119427	0.0961761	3.87523e-06	2.11376e-05	2.0433e-05
19027	Lait concentré sucré, entier		324	27.2	7.7	55.6	55.6	0	0	7.87	5.17	1.99	0.27	73	14	0.16	85.2	25.2	253	371	290	0.0056	0.19	0.013	0.96	2.25	24.5	0.944282	1.67795	0.0224413	0.162043	0.162043	0	0	0.0229367	0.0150677	0.00579976	0.000786901	0.212755	0.0408023	0.000466312	0.248311	0.0734441	0.737356	1.08126	0.84519	1.63209e-05	0.000553745	3.78878e-05
19039	Lait, teneur en matière grasse inconnue, UHT (aliment moyen)		47.6	89.4	3.38	4.82	4.62	0	0	1.59	1.06	0.36	0.024	18.7	10.3	0.11	36.6	11.8	89.4	166	117	0.0033	0.041	0.0082	0.39	6.47	11.9	2.14043	5.51502	0.151988	0.216741	0.207747	0	0	0.0714974	0.0476649	0.0161881	0.00107921	0.840881	0.463159	0.00494636	1.64579	0.53061	4.02004	7.46451	5.26113	0.000148391	0.00184364	0.000368729
19041	Lait demi-écrémé, UHT		47.3	89.4	3.38	4.83	4.66	0	0	1.55	1.04	0.34	0.02	19.2	9.45	0.13	36	12.1	89.1	167	117	0.0031	0.045	0.0087	0.39	5	12.1	41.8462	5.51502	2.99028	4.27309	4.12269	0	0	1.37128	0.920085	0.300797	0.0176939	16.9862	8.36039	0.115011	31.8491	10.7048	78.8265	147.744	103.51	0.00274256	0.0398114	0.00769686
19042	Lait demi-écrémé, pasteurisé		46.7	89.4	3.19	4.9	4.81	0	0	1.54	1.06	0.32	0.02	13.2	8.33	0.041	31	11.1	96	153	119	0.002	0.031	0.0031	0.41	1.68	17.9	1.65763	5.51502	0.11323	0.173927	0.170733	0	0	0.0546628	0.0376251	0.0113585	0.000709907	0.468538	0.295676	0.00145531	1.10036	0.393998	3.40755	5.43079	4.22395	7.09907e-05	0.00110036	0.000110036
19044	Lait en poudre, demi-écrémé		461	2.47	31.5	43.4	43.4	0	0	17.5	11.6	4.14	0.46	310	14	0.4	313	97	829	1330	1030	0.048	0.35	0.058	3.7	8.8	77.5	0.646036	0.152372	0.0441435	0.0608199	0.0608199	0	0	0.0245242	0.016256	0.00580172	0.000644635	0.434428	0.0196193	0.000560552	0.438632	0.135934	1.16174	1.86384	1.44342	6.72663e-05	0.000490483	8.12801e-05
19049	Lait demi-écrémé, UHT, enrichi en vitamines		46.9	89.4	3.38	4.8	4.5	0	0	1.52	0.98	0.36	0.02	15.7	9.45	0.04	36	9.8	84	160	120	0.005	0.025	0.005	0.37	10	10	1.87253	5.51502	0.13495	0.191645	0.179667	0	0	0.0606875	0.0391275	0.0143734	0.00079852	0.626838	0.377301	0.00159704	1.43734	0.391275	3.35378	6.38816	4.79112	0.00019963	0.00099815	0.00019963
19050	Lait écrémé, UHT		33.7	90.9	3.51	4.64	4.64	0	0	0.06	0.03	0.02	0.005	1	9.45	0	39	12.3	92.1	166	105	0.0028	0.028	0.007	0.37	5	13.5	3.5549	5.60755	0.370258	0.489458	0.489458	0	0	0.0063292	0.0031646	0.00210973	0.000527433	0.105487	0.996849	0	4.11398	1.29749	9.71532	17.5108	11.0761	0.000295363	0.00295363	0.000738407
19051	Lait écrémé, pasteurisé		34.8	90.8	3.28	4.99	4.93	0	0	0.19	0.11	0.046	0.0057	1.78	7	0.009	43.2	11.6	99	157	123	0.0055	0.03	0.012	0.42	1.66	24.3	0.823459	5.60138	0.0776134	0.118076	0.116657	0	0	0.0044959	0.00260289	0.00108848	0.000134877	0.0421195	0.165638	0.000212964	1.02223	0.274486	2.3426	3.71503	2.9105	0.000130144	0.000709879	0.000283951
19054	Lait en poudre, écrémé		364	1.95	35.3	54	53.1	0	0	0.7	0.34	0.15	0.03	9.75	1	0.027	482	112	966	1670	1250	0.05	0.31	0.07	4.47	13	7	4.76629	0.120294	0.462225	0.707086	0.695301	0	0	0.00916593	0.00445202	0.00196413	0.000392826	0.127668	0.0130942	0.000353543	6.3114	1.46655	12.649	21.8673	16.3677	0.000654709	0.0040592	0.000916593
19060	Lait demi-écrémé, à teneur réduite en lactose		44.7	89.7	3.45	4.69	4.66	0	0	1.29	0.86	0.29	0.02	19.2	9.45	0.089	35	11.1	93	160	120	0.0031	0.03	0.007	0.38	5	13.5	0.503985	5.53353	0.0388981	0.0528789	0.0525407	0	0	0.0145445	0.00969635	0.0032697	0.000225497	0.216477	0.106547	0.00100346	0.394619	0.125151	1.04856	1.80397	1.35298	3.4952e-05	0.000338245	7.89238e-05
19120	Boisson lactée aromatisée (arôme inconnu), sucrée, au lait partiellement écrémé, enrichie et/ou restaurée en vitamines et/ou minéraux (aliment moyen)		64.1	84.7	2.75	10.8	9.45	0.05	0.5	0.99	0.7	0.26	0.023	39	11	0.042	38.1	17	99	185	85	0.036	0.3	0.11	0.44	1.34	15.4	0.0965385	5.22508	0.00414167	0.0162655	0.0142323	7.5303e-05	0.00075303	0.001491	0.00105424	0.000391576	3.46394e-05	0.0587364	0.0165667	6.32546e-05	0.0573809	0.025603	0.1491	0.278621	0.128015	5.42182e-05	0.000451818	0.000165667
19200	Lait de chèvre, entier, UHT		46.1	89.6	3.77	4.13	4.13	0	0	1.57	1.06	0.32	0.04	13.4	0	0.04	58.6	13	110	190	110	0.0053	0.02	0	0.33	2	15.3	0.209406	5.52736	0.0171249	0.0187602	0.0187602	0	0	0.0071316	0.00481497	0.00145358	0.000181697	0.0608685	0	0.000181697	0.266186	0.0590515	0.499667	0.86306	0.499667	2.40748e-05	9.08485e-05	0
19250	Lait de brebis, entier		103	82.2	5.68	4.5	4.5	0	0	6.97	4.8	1.6	0.3	20.3	0	0.15	44	17.1	158	103	199	0.018	0.46	0.011	0.54	3	23.3	0.000750363	5.07086	4.13792e-05	3.27828e-05	3.27828e-05	0	0	5.0777e-05	3.49684e-05	1.16561e-05	2.18552e-06	0.000147887	0	1.09276e-06	0.000320543	0.000124575	0.00115104	0.000750363	0.00144973	1.31131e-07	3.35113e-06	8.01358e-08
19402	Crème de lait ou spécialité à base de crème légère, teneur en matière grasse inconnue (aliment moyen)		269	68	2.88	2.87	2.77	0.058	1.39	26	17.8	6.08	0.56	211	78.1	0.52	31.9	8.13	66.2	105	82.2	0.0031	0.098	0.0075	0.27	1.18	10.6	0.323077	4.19487	0.00345897	0.00344696	0.00332686	6.96598e-05	0.00166943	0.0312268	0.0213784	0.00730227	0.000672577	0.253418	0.0938005	0.000624536	0.0383129	0.00976438	0.0795083	0.126108	0.0987248	3.7232e-06	0.000117701	9.00773e-06
19410	Crème de lait, 30% MG, épaisse, rayon frais		304	65.5	3	2.8	2.66	0.1	1.5	30.7	20.8	7	0.67	195	73	0.5	28	7.92	64	101	76.9	0.0018	0.08	0.0075	0.24	1.1	10.6	20.6261	4.04065	0.203547	0.189977	0.180478	0.00678489	0.101773	2.08296	1.41126	0.474943	0.0454588	13.2305	4.95297	0.0339245	1.89977	0.537364	4.34233	6.85274	5.21758	0.000122128	0.00542792	0.000508867
19415	Crème de lait, 30% MG, liquide, UHT		297	62.9	2.49	1.94	1.94	0	1.5	30.7	21.4	6.65	0.56	329	66	0.97	29	6.93	59.3	89.5	67	0.0025	0.041	0.0083	0.24	1.29	10.6	1.49378	3.88025	0.0125236	0.00975736	0.00975736	0	0.00754435	0.154408	0.107633	0.0334466	0.00281656	1.65473	0.331951	0.00487868	0.145857	0.0348549	0.298253	0.450146	0.336981	1.25739e-05	0.000206212	4.17454e-05
19430	Crème de lait, 15 à 20% MG, légère, liquide, UHT		170	72.4	2.96	4.3	4.2	0	0	13.5	9.4	3.08	0.26	189	73	0.34	60	9	71	127	105	0.007	0.041	0.007	0.34	1.29	10.6	3.13983	4.4663	0.05467	0.0794192	0.0775722	0	0	0.249339	0.173614	0.0568863	0.00480209	3.49075	1.34828	0.00627966	1.10817	0.166226	1.31134	2.34564	1.93931	0.000129287	0.000757253	0.000129287
19431	Crème de lait, 15 à 20% MG, légère, épaisse, rayon frais		166	76.2	2.81	3	3	0	1.5	15.3	10.4	3.46	0.27	189	105	0.28	34	9	73	117	98	0.007	0.22	0.007	0.34	1.29	10.6	0.605452	4.70072	0.0102489	0.0109419	0.0109419	0	0.00547095	0.0558037	0.0379319	0.0126197	0.000984771	0.68934	0.382967	0.00102124	0.124008	0.0328257	0.266253	0.426734	0.357435	2.55311e-05	0.000802406	2.55311e-05
19433	Spécialité à base de crème légère 8% MG, fluide ou épaisse		76.4	84.8	3.25	5.28	4.44	0	1.5	4.3	2.88	1.01	0.07	76.9	73	0.23	43	10	80	140	105	0.007	0.04	0.007	0.34	1.3	10.6	0.126814	5.23125	0.00539458	0.00876411	0.00736982	0	0.0024898	0.00713744	0.00478042	0.00167647	0.000116191	0.127644	0.12117	0.00038177	0.0713744	0.0165987	0.13279	0.232382	0.174286	1.16191e-05	6.63948e-05	1.16191e-05
19501	Fromage blanc nature ou aux fruits (aliment moyen)		117	79.5	6.19	5.25	3.33	0.1	0	7.65	4.99	2.02	0.24	90	41	0.05	40.8	9.6	94	140	104	0.0039	0.5	0.031	0.41	1.68	56	0.125208	4.90429	0.00662428	0.00561833	0.00356363	0.000107016	0	0.00818671	0.00534009	0.00216172	0.000256838	0.0963142	0.0438765	5.35079e-05	0.0436624	0.0102735	0.100595	0.149822	0.111296	4.17362e-06	0.000535079	3.31749e-05
19530	Spécialité fromagère non affinée à tartiner environ 30-35 % MG aromatisée (ex: ail et fines herbes)		367	50.8	7.66	4.24	1.86	0	0	35.3	23.9	8.11	0.86	232	55.5	0.66	479	7.7	130	111	93.8	0.05	0.21	0.05	1.05	4.1	15.5	1.59853	3.13381	0.0333644	0.018468	0.00810153	0	0	0.153755	0.1041	0.0353244	0.00374587	1.01051	0.241739	0.00287474	2.08636	0.0335386	0.566236	0.483478	0.408561	0.000217783	0.000914689	0.000217783
19539	Lait fermenté ou spécialité laitière type yaourt, aromatisé, sucré, au bifidus		94.8	78.4	3.83	11.5	11.5	0	1.5	3.1	2.11	0.69	0.05	1	25	0.05	40	11.7	101	139	122	0.001	0.5	0.007	0.41	1.1	8.1	1.85938	4.83644	0.0751206	0.225558	0.225558	0	0.0294206	0.0608026	0.041385	0.0135335	0.000980687	0.0196137	0.490343	0.000980687	0.78455	0.229481	1.98099	2.72631	2.39288	1.96137e-05	0.00980687	0.000137296
19542	Lait fermenté ou spécialité laitière type yaourt, aux fruits, sucré, au bifidus		96.7973	77.3	4.9	11.6	11.6	0	0.1	3.1	2	0.75	0.12	28	12	0	60	15	125	213	159	0.035	0.12	0.008	0.48	1.2	19.6	1.56619	4.76858	0.0792823	0.187689	0.187689	0	0.00161801	0.0501582	0.0323601	0.012135	0.00194161	0.453042	0.194161	0	0.970804	0.242701	2.02251	3.44635	2.57263	0.000566302	0.00194161	0.00012944
19546	Lait fermenté ou spécialité laitière type yaourt, nature, au bifidus		64.8	87.2	3.84	3.47	3.32	0.15	0.088	3.6	2.3	0.87	0.076	22.3	19	0.3	47.6	12.1	97.3	145	130	0.05	0.07	0.05	0.45	1.1	11.5	1.86993	5.3793	0.110811	0.100134	0.095805	0.00432854	0.00253941	0.103885	0.066371	0.0251055	0.00219313	0.64351	0.548282	0.00865708	1.37359	0.349169	2.80778	4.18426	3.7514	0.00144285	0.00201999	0.00144285
19550	Yaourt à la grecque, au lait de brebis		97.5	86.2	5.14	4.56	2.8	0	0.5	6.08	4.8	1.16	0.12	22.3	19	0.076	40	11.6	92.3	148	183	0.02	0.1	0.01	0.4	2.38	10.5	0.460372	5.31761	0.0242699	0.0215312	0.0132209	0	0.00236088	0.0287083	0.0226645	0.00547725	0.000566612	0.105295	0.0897135	0.000358854	0.188871	0.0547725	0.435819	0.698821	0.864083	9.44353e-05	0.000472176	4.72176e-05
19552	Yaourt à la grecque, sur lit de fruits		132	75.2	2.31	16.3	15	0.18	0.38	6.3	4.45	1.27	0.24	55	37.1	0.25	38.7	8.4	71	110	104	0.12	0.07	0.02	0.27	10	10	0.135523	4.63903	0.00237166	0.0167351	0.0154004	0.000184805	0.000390143	0.00646816	0.00456878	0.0013039	0.000246406	0.0564681	0.0380903	0.000256673	0.039733	0.00862421	0.0728951	0.112936	0.106776	0.000123203	7.18684e-05	2.05338e-05
19556	Yaourt au lait de chèvre, nature, 5% MG environ		73.8	86.2	4.15	1.12	1.12	0	1.5	5.2	3.52	1.11	0.14	22.3	0	0.03	36	14	110	170	160	0	0.2	0.01	0.4	2.38	10.5	0.135673	5.31761	0.00762932	0.002059	0.002059	0	0.00275759	0.00955963	0.00647114	0.00204061	0.000257375	0.0409961	0	5.51517e-05	0.0661821	0.0257375	0.202223	0.312526	0.294143	0	0.000367678	1.83839e-05
19559	Yaourt, lait fermenté ou spécialité laitière, aromatisé, avec édulcorants, 0% MG		54.8	85.2	4.53	8.29	4.23	0	0	0.06	0.038	0.013	0.0013	1	4	0.076	57.5	11.6	92.3	148	141	0.05	0.1	0.05	0.52	2.5	15.1	0.294841	5.25592	0.0243728	0.0446028	0.0227587	0	0	0.000322819	0.000204452	6.99441e-05	6.99441e-06	0.00538032	0.0215213	0.000408904	0.309368	0.0624117	0.496603	0.796287	0.758625	0.000269016	0.000538032	0.000269016
19575	Yaourt, lait fermenté ou spécialité laitière, aromatisé, sucré		89.3	79.8	3.42	12.2	12.1	0.17	0.17	2.6	1.75	0.4	0.041	26	13	0.041	50.9	10.9	86	140	120	0.05	0.1	0.05	0.4	1.39	8.17	8.32941	4.9228	0.318998	1.13795	1.12862	0.0158567	0.0158567	0.242513	0.16323	0.0373098	0.00382425	2.42513	1.21257	0.00382425	4.74767	1.01669	8.0216	13.0584	11.1929	0.00466372	0.00932744	0.00466372
19577	Yaourt, lait fermenté ou spécialité laitière, aromatisé, sucré, à la crème		115	77.6	3.08	13.4	12.4	0.18	0.083	5.45	4.18	1.01	0.12	49.1	29.5	0.15	35.5	9.2	82	120	105	0.005	0.04	0.01	0.38	10	10	0.727267	4.78709	0.0194781	0.0847424	0.0784184	0.00113833	0.000524897	0.0344661	0.0264346	0.0063873	0.000758887	0.310511	0.18656	0.000948609	0.224504	0.0581814	0.518573	0.758887	0.664027	3.16203e-05	0.000252962	6.32406e-05
19580	Yaourt, lait fermenté ou spécialité laitière, aux copeaux de chocolat, à la crème, sucré		122	74.2	3.51	14.1	14	0.093	1.5	5.1	3.3	1.31	0.13	42	19	0.16	34	14	98	178	120	0.02	0.3	0.02	0.4	1.3	17	0.0579985	4.57734	0.00166864	0.0067031	0.00665556	4.4212e-05	0.000713096	0.00242453	0.00156881	0.00062277	6.18017e-05	0.0199667	0.00903255	7.60636e-05	0.0161635	0.00665556	0.0465889	0.0846207	0.0570477	9.50795e-06	0.000142619	9.50795e-06
19581	Yaourt, lait fermenté ou spécialité laitière, aux fruits, avec édulcorants, 0% MG		39.3	88.5	4.21	3.72	3.72	0	1.5	0.15	0.005	0.005	0.005	1.5	87	0.08	46	14.1	95	159	122	0.089	0.2	0.016	0.41	2.25	11.6	1.23013	5.4595	0.131777	0.11644	0.11644	0	0.0469515	0.00469515	0.000156505	0.000156505	0.000156505	0.0469515	2.72319	0.00250408	1.43985	0.441344	2.97359	4.97686	3.81872	0.00278579	0.0062602	0.000500816
19582	Yaourt, lait fermenté ou spécialité laitière, aux fruits, avec édulcorants, 0% MG, enrichi en vitamine D		88.1	79.5	3.43	13.6	12.9	0	0.075	1.79	1.22	0.39	0.04	22.3	19	0.076	50	12	90	148	156	0.02	0.1	0.01	0.4	2.38	10.5	0.126636	4.90429	0.00493031	0.0195487	0.0185425	0	0.000107806	0.00257296	0.00175364	0.000560589	5.74963e-05	0.0320542	0.0273107	0.000109243	0.0718703	0.0172489	0.129367	0.212736	0.224235	2.87481e-05	0.000143741	1.43741e-05
19584	Mascarpone		386	51.5	4.38	4	4	0	0	39	25.7	10.1	1.03	345	258	1	32.2	13	110	120	130	0.005	0.06	0.005	0.53	25	21	0.65792	3.177	0.00746552	0.00681783	0.00681783	0	0	0.0664738	0.0438045	0.017215	0.00175559	0.588038	0.43975	0.00170446	0.0548835	0.0221579	0.18749	0.204535	0.221579	8.52228e-06	0.000102267	8.52228e-06
19585	Ricotta		165	71.7	8.79	4	2.25	0	0	11.9	8.08	3.23	0.39	117	33	0.11	109	11	158	105	314	0.006	0.38	0.021	1.16	6.85	18	0.639879	4.42312	0.0340881	0.0155122	0.00872562	0	0	0.0461489	0.0313347	0.0125261	0.00151244	0.453732	0.127976	0.000426586	0.422708	0.0426586	0.612733	0.407196	1.21771	2.32683e-05	0.00147366	8.14392e-05
19587	Yaourt, lait fermenté ou spécialité laitière, aux fruits, sucré		92.2562	77.4	4.2	11.1	11.1	0	0.1	3.2	2.03	0.76	0.12	26	65	0	65	14	110	220	110	0.01	0.18	0	0.51	1.5	16.7	5.56359	4.77475	0.253285	0.669396	0.669396	0	0.00603059	0.192979	0.122421	0.0458325	0.00723671	1.56795	3.91988	0	3.91988	0.844283	6.63365	13.2673	6.63365	0.000603059	0.0108551	0
19588	Yaourt, lait fermenté ou spécialité laitière, aux fruits, sucré, 0% MG		42.8	87.7	4.29	4.92	4.01	0.015	1.12	0.13	0.015	0.005	0.005	2.02	66.1	0.08	49.7	14	97.2	164	129	0.078	0.19	0.024	0.44	2.84	12.9	0.582628	5.41015	0.0583989	0.066975	0.0545873	0.000204192	0.0152463	0.00176966	0.000204192	6.8064e-05	6.8064e-05	0.0274978	0.899806	0.00108902	0.676556	0.190579	1.32316	2.2325	1.75605	0.0010618	0.00258643	0.000326707
19589	Yaourt, lait fermenté ou spécialité laitière, aux fruits, sucré, à la crème		96.7973	77.3	4.9	11.6	11.6	0	0.1	3.1	2	0.75	0.12	28	12	0	60	15	125	213	159	0.035	0.12	0.008	0.48	1.2	19.6	5.93152	4.76858	0.300261	0.710821	0.710821	0	0.00612777	0.189961	0.122555	0.0459583	0.00735332	1.71578	0.735332	0	3.67666	0.919166	7.65971	13.0522	9.74315	0.00214472	0.00735332	0.000490222
19590	Mozzarella au lait de vache		229	62.7	16.5	0.75	0.7	0	0	17.7	11.7	4.24	0.45	174	57	0.19	240	20	354	76	545	0.03	0.44	0.011	2.92	16.3	37.2	5.83726	3.86792	0.420589	0.0191177	0.0178432	0	0	0.451177	0.298236	0.108079	0.0114706	4.4353	1.45294	0.00484314	6.11765	0.509805	9.02354	1.93726	13.8922	0.000764707	0.0112157	0.000280393
19592	Yaourt, lait fermenté ou spécialité laitière, aux fruits, sucré, enrichi en vitamine D		92.3	78.9	3.51	14	12.7	0.18	0.1	2.35	1.45	0.5	0.06	25.3	103	0.21	44.8	12	94	160	129	0.02	0.04	0.01	0.44	10	10	0.0290743	4.86728	0.00110564	0.00440997	0.00400047	5.66996e-05	3.14998e-05	0.000740245	0.000456747	0.000157499	1.88999e-05	0.00796945	0.0324448	6.61496e-05	0.0141119	0.00377998	0.0296098	0.0503997	0.0406347	6.29996e-06	1.25999e-05	3.14998e-06
19593	Yaourt, lait fermenté ou spécialité laitière, nature		45.8	88.6	3.96	2.65	2.65	0	1.5	1.5	1	0.34	0.02	11	6	0.076	43	12.5	98	176	128	0.0053	0.25	0.0078	0.39	1.68	26.3	8.02831	5.46567	0.69415	0.46452	0.46452	0	0.262936	0.262936	0.175291	0.0595988	0.00350581	1.9282	1.05174	0.0133221	7.53749	2.19113	17.1785	30.8511	22.4372	0.00092904	0.0438226	0.00136727
19594	Yaourt, lait fermenté ou spécialité laitière, nature, 0% MG		39.8	88.9	4.82	4.1	4.1	0	0	0.064	0.041	0.018	0.0018	1.5	4	0	57.3	13.6	105	182	129	0.0026	0.1	0.0083	0.46	2.25	27.8	1.1381	5.48417	0.13783	0.117241	0.117241	0	0	0.00183011	0.00117241	0.000514718	5.14718e-05	0.0428932	0.114382	0	1.63852	0.388898	3.00252	5.20437	3.68881	7.43482e-05	0.00285955	0.000237342
19598	Yaourt, lait fermenté ou spécialité laitière, nature, à la crème		115	82.6	3.06	3.08	3.08	0	0	9.8	6.51	2.25	0.22	84.7	39.1	0.22	35	9.4	86	150	110	0.005	0.025	0.005	0.35	10	10	1.59267	5.09553	0.0423789	0.0426559	0.0426559	0	0	0.135723	0.0901591	0.031161	0.00304685	1.17304	0.541508	0.00304685	0.484726	0.130184	1.19104	2.0774	1.52343	6.92466e-05	0.000346233	6.92466e-05
19599	Yaourt, lait fermenté ou spécialité laitière, nature, sucré		84.6	80.2	3.48	12.5	12.5	0	0	1.95	1.29	0.54	0.061	25	14	0.07	48.8	11.4	92.5	157	120	0.05	0.23	0.05	0.41	2.5	8	2.85335	4.94748	0.117372	0.421594	0.421594	0	0	0.0657687	0.0435085	0.0182129	0.00205738	0.843188	0.472185	0.00236093	1.6459	0.384494	3.1198	5.29522	4.0473	0.00168638	0.00775733	0.00168638
19641	Faisselle, 6% MG environ		84.5	84.7	4.47	3.57	3.57	0	0	5.5	3.74	1.15	0.14	62.9	30	0.13	35	11	110	150	130	0.005	0.025	0.005	0.44	10	10	0.921818	5.22508	0.0487636	0.0389454	0.0389454	0	0	0.06	0.0408	0.0125454	0.00152727	0.686181	0.327273	0.00141818	0.381818	0.12	1.2	1.63636	1.41818	5.45454e-05	0.000272727	5.45454e-05
19644	Fromage blanc nature, 0% MG		50.1	86.5	7.95	3.89	3.89	0	0	0.044	0.027	0.013	0.0017	4	3	0	44.3	12.2	116	144	134	0.0051	0.16	0.011	0.49	1.68	10.4	0.608333	5.33612	0.0965319	0.0472339	0.0472339	0	0	0.000534265	0.000327844	0.000157851	2.0642e-05	0.0485695	0.0364271	0	0.537907	0.148137	1.40852	1.7485	1.62708	6.19261e-05	0.00194278	0.000133566
19646	Fromage blanc nature, 3% MG environ		77.5	83.7	8.03	3.46	3.46	0	0	3.26	2.12	0.87	0.09	29	20	0.14	42.4	10.2	115	132	130	0.05	0.13	0.01	0.52	2.25	14.5	2.10794	5.16339	0.21841	0.0941095	0.0941095	0	0	0.0886696	0.0576625	0.0236634	0.00244793	0.788779	0.543986	0.0038079	1.15325	0.277433	3.12792	3.5903	3.53591	0.00135996	0.00353591	0.000271993
19649	Fromage blanc nature, gourmand, 8% MG environ		117	79.5	6.19	5.25	3.33	0.1	0	7.65	4.99	2.02	0.24	90	41	0.05	40.8	9.6	94	140	104	0.0039	0.5	0.031	0.41	1.68	56	3.8606	4.90429	0.204249	0.173232	0.109879	0.00329966	0	0.252424	0.164653	0.0666532	0.00791919	2.9697	1.35286	0.00164983	1.34626	0.316767	3.10168	4.61953	3.43165	0.000128687	0.0164983	0.00102289
19659	Fromage blanc ou spécialité laitière, aux fruits, sucré, gourmand, 7% MG environ		130	73	5.18	13.4	12.5	0	0.68	5.53	3.59	1.26	0.14	9	25	0.05	52.2	9.5	98	121	93.3	0.0051	0.5	0.01	0.44	2.13	54	0.373253	4.50331	0.0148727	0.0384738	0.0358897	0	0.0019524	0.0158776	0.0103075	0.00361768	0.000401965	0.0258406	0.0717794	0.000143559	0.149875	0.0272762	0.281375	0.347412	0.267881	1.4643e-05	0.00143559	2.87118e-05
19661	Fromage frais type petit suisse, aux fruits, 2-3% MG		103	77.3	6.39	13.1	12.4	0	0	2.65	1.69	0.6	0.067	25.2	25	0.095	84.3	10.2	115	140	120	0.0051	0.15	0.01	0.44	2.13	10.4	1.0608	4.76858	0.065811	0.134918	0.127708	0	0	0.0272925	0.0174054	0.00617943	0.000690037	0.259536	0.257476	0.00097841	0.86821	0.10505	1.18439	1.44187	1.23589	5.25252e-05	0.00154486	0.000102991
19663	Fromage frais type petit suisse, nature, 0% MG		59.8	84.3	9.89	3.8	3.2	0	0	0.24	0.16	0.055	0.0061	1	25	0.05	44.8	11.4	129	166	127	0.0051	0.5	0.01	0.44	9.3	54	0.220791	5.2004	0.0365155	0.0140302	0.0118149	0	0	0.000886119	0.000590746	0.000203069	2.25222e-05	0.00369216	0.0923041	0.000184608	0.165409	0.0420907	0.476289	0.612899	0.468905	1.883e-05	0.00184608	3.69216e-05
19664	Fromage frais type petit suisse, nature, 4% MG environ		89.6	81.6	9.95	2.84	2.84	0	0	4	2.74	0.87	0.07	25.2	25	0.095	33	40	126	114	103	0.0051	0.14	0.01	0.48	2	14	0.442931	5.03384	0.0491871	0.0140393	0.0140393	0	0	0.0197737	0.013545	0.00430079	0.00034604	0.124574	0.123586	0.000469626	0.163133	0.197737	0.622872	0.563551	0.509173	2.52115e-05	0.00069208	4.94343e-05
19666	Fromage frais type petit suisse, nature, 9% MG environ		150	76	9.7	3.17	3.17	0	1.5	10.4	6.99	2.39	0.2	75.3	25	0.23	23	9.4	125	130	110	0.005	0.2	0.01	0.43	10	10	1.29208	4.68838	0.0835548	0.0273061	0.0273061	0	0.0129208	0.0895845	0.0602112	0.0205872	0.00172278	0.648627	0.215347	0.0019812	0.19812	0.0809706	1.07674	1.11981	0.947529	4.30695e-05	0.00172278	8.6139e-05
19667	Fromage frais type petit suisse, aromatisé aux fruits, 2-3% MG, enrichi en calcium et vitamine D		90.8	78.9	5.74	10.2	10.1	0.18	1	2.5	1.61	0.56	0.05	24.9	43	0.04	30	9.4	110	110	170	0.02	0.07	0.005	0.43	10	10	0.165075	4.86728	0.0104354	0.0185437	0.0183619	0.000327242	0.00181801	0.00454503	0.002927	0.00101809	9.09006e-05	0.0452685	0.0781745	7.27204e-05	0.0545403	0.0170893	0.199981	0.199981	0.309062	3.63602e-05	0.000127261	9.09006e-06
19801	Lait fermenté à boire, nature, maigre		33.9	90.6	3.51	2.18	2.18	0	1.5	0.6	0.39	0.12	0.005	1	25	0.05	35	10.2	91	120	160	0.5	0.5	0.0095	0.5	2.5	17	0.0425625	5.58905	0.00440691	0.00273706	0.00273706	0	0.0018833	0.000753318	0.000489657	0.000150664	6.27765e-06	0.00125553	0.0313883	6.27765e-05	0.0439436	0.0128064	0.114253	0.150664	0.200885	0.000627765	0.000627765	1.19275e-05
19805	Lait fermenté à boire, nature, au lait entier		56	88.3	3.38	1.99	1.99	0	1.5	3.2	2.24	0.7	0.04	30.6	19	0.092	35	12.7	95	155	127	0.009	0.05	0.01	0.44	1.3	24.3	0.210291	5.44716	0.0126926	0.00747284	0.00747284	0	0.00563279	0.0120166	0.00841163	0.00262864	0.000150208	0.114909	0.0713487	0.000345478	0.131432	0.047691	0.356743	0.582055	0.47691	3.37967e-05	0.00018776	3.75519e-05
19860	Yaourt à la grecque, nature		117	80.4	3.32	4.21	3.9	0	0.07	9.22	6.22	2.53	0.28	22.3	19	0.076	34.5	11.6	92.3	148	139	0.02	0.1	0.01	0.4	2.38	10.5	0.776641	4.95982	0.022038	0.0279458	0.025888	0	0.000464657	0.0612019	0.0412881	0.016794	0.00185863	0.148026	0.126121	0.000504485	0.229009	0.0770003	0.612683	0.982417	0.922676	0.000132759	0.000663796	6.63796e-05
19865	Kéfir		63.5	87.6	3.19	4.5	3.62	0	0	3.5	2.33	0.97	0.1	30.6	19	0.092	49	12.7	95	155	127	0.009	0.05	0.01	0.44	1.3	24.3	0.100893	5.40398	0.00506848	0.00714989	0.00575169	0	0	0.00556103	0.00370205	0.0015412	0.000158886	0.0486192	0.0301884	0.000146176	0.0778544	0.0201786	0.150942	0.246274	0.201786	1.42998e-05	7.94432e-05	1.58886e-05
20000	Artichaut, cuit		33.2	85.8	2.53	0.99	0.99	0	8.3	0.28	0.069	0.011	0.14	0	8	0.19	60	44.6	73	427	42.9	0.14	0.67	0.082	0.29	5	2.5	0.273987	5.29294	0.0208791	0.00817009	0.00817009	0	0.0684967	0.00231073	0.000569431	9.07788e-05	0.00115537	0	0.0660209	0.001568	0.495157	0.368067	0.602441	3.52387	0.354037	0.00115537	0.00552925	0.000676715
20001	Asperge, bouillie/cuite à l'eau		26.6	92.7	2.69	1.73	1.3	0.18	2.2	0.3	0.07	0.005	0.19	0	438	1.5	2.5	10	49	220	21	0.13	0.64	0.11	0.49	10	10	0.311435	5.71859	0.0314947	0.020255	0.0152205	0.00210746	0.0257578	0.00351243	0.000819566	5.85404e-05	0.00222454	0	5.12814	0.0175621	0.0292702	0.117081	0.573696	2.57578	0.24587	0.00152205	0.00749317	0.00128789
20002	Aubergine, cuite		32.7	88.6	1.33	4.17	3.41	0.18	4.3	0.28	0.052	0.07	0.12	0	22	0.41	5.95	15	15	123	20.1	0.12	0.25	0.058	0.098	1.68	1	1.42011	5.46567	0.0577598	0.181096	0.148091	0.00781711	0.186742	0.01216	0.00225828	0.00303999	0.00521141	0	0.955425	0.0178056	0.258399	0.651426	0.651426	5.34169	0.872911	0.00521141	0.0108571	0.00251885
20003	Betterave rouge, cuite		42.8	88.3	1.44	7.13	6.7	0.18	2.5	0.4	0.15	0.13	0.07	0	2.5	0.04	90	17	18	320	24	0.31	0.29	0.07	0.29	10	10	1.30329	5.44716	0.0438488	0.217113	0.204019	0.00548111	0.0761265	0.0121802	0.00456759	0.00395858	0.00213154	0	0.0761265	0.00121802	2.74055	0.51766	0.548111	9.74419	0.730814	0.00943968	0.00883067	0.00213154
20005	Bette ou blette, cuite		14.7	95.3	0.7	1.23	0.8	0.18	2.5	0.25	0.005	0.005	0.005	0	89.2	0.41	99.6	18	11	240	56	0.16	0.35	0.04	0.08	10	10	0.0437044	5.87898	0.00208116	0.0036569	0.00237847	0.000535156	0.00743272	0.000743272	1.48654e-05	1.48654e-05	1.48654e-05	0	0.265199	0.00121897	0.296119	0.0535156	0.032704	0.713541	0.166493	0.000475694	0.00104058	0.000118923
20006	Brocoli, cuit		22.8	92.5	2.1	1.1	1.1	0	1.5	0.78	0.2	0.042	0.18	0	312	0.9	39	11.2	51	125	43.3	0.05	0.05	0.05	0.05	1.29	5	0.305179	5.70626	0.0281086	0.0147236	0.0147236	0	0.0200776	0.0104403	0.00267701	0.000562172	0.00240931	0	4.17614	0.0120466	0.522017	0.149913	0.682638	1.67313	0.579573	0.000669253	0.000669253	0.000669253
20007	Carotte, appertisée, égouttée		21.9	93	0.67	3.4	2.49	0.47	1.75	0.2	0.057	0.009	0.092	0	5330	0.74	233	8	24	179	25	0.45	0.64	0.1	0.26	0.85	2	0.200865	5.7371	0.0061452	0.0311846	0.0228381	0.00431081	0.0160509	0.00183439	0.0005228	8.25474e-05	0.000843818	0	48.8864	0.00678723	2.13706	0.0733755	0.220126	1.64178	0.229298	0.00412737	0.00587004	0.000917193
20008	Carotte, cuite		41.6	87.7	0.63	7.33	6.9	0.18	3.7	0.3	0.07	0.06	0.14	0	8930	0.84	45	10	19	240	26	0.18	0.22	0.04	0.21	10	10	4.33827	5.41015	0.0656998	0.764412	0.719569	0.0187714	0.385856	0.0312856	0.00729998	0.00625712	0.0146	0	931.269	0.0875997	4.69284	1.04285	1.98142	25.0285	2.71142	0.0187714	0.0229428	0.00417142
20009	Carotte, crue		40.2	88.1	0.63	7.59	6	0.4	2.7	0.25	0.005	0.005	0.005	0	8290	0.27	43	10	22	230	25	0.1	0.24	0.05	0.18	10	10	1.65608	5.43482	0.0259534	0.312677	0.247176	0.0164784	0.111229	0.010299	0.00020598	0.00020598	0.00020598	0	341.514	0.0111229	1.77143	0.411959	0.906311	9.47507	1.0299	0.00411959	0.00988702	0.0020598
20011	Champignon, tout type, appertisé, égoutté		24.9	91.1	1.87	2.56	2.19	0	2.4	0.29	0.038	0.005	0.11	0	0	0.01	425	6.65	66	129	18.9	0.035	0.79	0.15	0.51	1.1	2	0.243052	5.61989	0.0182533	0.0249885	0.0213769	0	0.0234267	0.00283073	0.000370923	4.88057e-05	0.00107373	0	0	9.76114e-05	4.14848	0.0649116	0.644235	1.25919	0.184485	0.00034164	0.0077113	0.00146417
20012	Salade ou chicorée frisée, crue		22.3	92.9	1.48	2.4	0.7	0.18	2.45	0.25	0.061	0.005	0.11	0	3430	2.26	33.5	22.5	37.5	367	76	0.42	0.85	0.2	0.61	1	0.4	0.0880437	5.73093	0.00584326	0.00947556	0.0027637	0.000710667	0.00967297	0.000987037	0.000240837	1.97407e-05	0.000434296	0	13.5422	0.00892282	0.132263	0.0888334	0.148056	1.44897	0.300059	0.00165822	0.00335593	0.00078963
20013	Chou de Bruxelles, cuit		45.4	85.5	3.19	5.4	4.1	1	4.8	0.15	0.005	0.005	0.005	0	216	0.44	9	19	62	410	35	0.2	0.51	0.13	0.31	10	10	0.172394	5.27443	0.0121132	0.0205051	0.0155687	0.00379724	0.0182267	0.000569585	1.89862e-05	1.89862e-05	1.89862e-05	0	0.820203	0.00167078	0.0341751	0.0721475	0.235429	1.55687	0.132903	0.000759447	0.00193659	0.000493641
20014	Chou rouge, cru		30	90.7	1.13	4.33	3.9	0.18	2.8	0.25	0.005	0.005	0.005	0	2.5	0.04	14	9.7	30	260	36	0.12	0.25	0.02	0.15	10	10	0.0380112	5.59521	0.00143176	0.00548629	0.00494146	0.000228067	0.00354771	0.00031676	6.3352e-06	6.3352e-06	6.3352e-06	0	0.0031676	5.06816e-05	0.0177386	0.0122903	0.0380112	0.329431	0.0456135	0.000152045	0.00031676	2.53408e-05
20015	Chou vert, cuit		21.6	92.7	1.63	1.83	1.4	0.18	3.3	0.15	0.005	0.005	0.005	0	130	0.04	5	7.3	29	130	48	0.11	0.34	0.11	0.13	10	10	0.107139	5.71859	0.00808502	0.00907705	0.00694419	0.000892825	0.0163685	0.000744021	2.48007e-05	2.48007e-05	2.48007e-05	0	0.644818	0.000198406	0.0248007	0.036209	0.143844	0.644818	0.238087	0.000545615	0.00168645	0.000545615
20016	Chou-fleur, cru		26.2	92.9	1.81	2.13	1.7	0.18	2.2	0.7	0.24	0.14	0.25	0	2.5	0.04	6	9.8	40	270	23	0.14	0.27	0.02	0.22	10	10	0.00978306	5.73093	0.000675853	0.00079534	0.000634779	6.72119e-05	0.000821478	0.000261379	8.96158e-05	5.22759e-05	9.33498e-05	0	0.000933498	1.4936e-05	0.0022404	0.00365931	0.014936	0.100818	0.00858818	5.22759e-05	0.000100818	7.46799e-06
20017	Chou-fleur, cuit		30.1	91.1	2.56	3.41	2.4	0	1.8	0.3	0.09	0.07	0.11	0	5.61	0.07	5	12	46	300	26	0.16	0.38	0.03	0.28	5	2.5	1.27128	5.61989	0.108122	0.144022	0.101364	0	0.0760234	0.0126706	0.00380117	0.00295646	0.00464587	0	0.236939	0.00295646	0.211176	0.506822	1.94282	12.6706	1.09812	0.00675763	0.0160494	0.00126706
20018	Coeur de palmier, appertisé, égoutté		34.7	90.2	2.45	4.03	1.5	0.18	2.32	0.5	0.13	0.1	0.2	0	209	0.43	316	38	65	177	58	1.39	3.13	0.13	1.15	10	0.5	0.0377085	5.56437	0.00266242	0.00437941	0.00163005	0.000195606	0.00252115	0.000543351	0.000141271	0.00010867	0.00021734	0	0.227121	0.000467281	0.343398	0.0412946	0.0706356	0.192346	0.0630287	0.00151051	0.00340137	0.000141271
20019	Concombre, pulpe et peau, cru		15.6	96	0.64	2.54	1.67	0.83	0.6	0.11	0.035	0.004	0.038	0	45	0.09	4.8	13.6	24.7	157	19.2	0.085	0.13	0.026	0.095	5	0.3	0.157942	5.92217	0.00647968	0.0257162	0.0169079	0.00840334	0.0060747	0.0011137	0.000354358	4.0498e-05	0.000384731	0	0.455603	0.000911205	0.0485976	0.137693	0.250075	1.58955	0.19439	0.000860583	0.00131619	0.000263237
20020	Courgette, pulpe et peau, crue		16.5	94.7	1.23	1.8	1.79	0	1.05	0.26	0.061	0.013	0.084	0	120	0.12	9	17.5	44.7	262	18.7	0.18	0.36	0.052	0.31	0.58	1.64	0.0515264	5.84197	0.00384106	0.00562106	0.00558983	0	0.00327895	0.000811931	0.000190492	4.05966e-05	0.000262316	0	0.374737	0.000374737	0.0281053	0.0546492	0.13959	0.818177	0.0583966	0.000562106	0.00112421	0.000162386
20021	Courgette, pulpe et peau, cuite		15.5	93.8	0.93	1.4	1.39	0	1.5	0.36	0.1	0.029	0.15	0	173	0.12	39	22.3	65	238	19.3	0.089	0.32	0.085	0.22	5	2.5	1.57893	5.78645	0.094736	0.142613	0.141595	0	0.1528	0.036672	0.0101867	0.00295413	0.01528	0	17.6229	0.012224	3.9728	2.27163	6.62133	24.2443	1.96603	0.00906613	0.0325973	0.00865867
20022	Cresson de fontaine, cru		14.6	94.6	2.09	0.9	0.2	0.18	0.85	0.15	0.027	0.008	0.035	0	1910	1	50.5	19	64.2	320	101	0.37	0.9	0.11	0.16	2.33	13.5	0.00406498	5.8358	0.000581904	0.000250581	5.56846e-05	5.01161e-05	0.00023666	4.17634e-05	7.51742e-06	2.22738e-06	9.7448e-06	0	0.531788	0.000278423	0.0140604	0.00529004	0.0178748	0.0890954	0.0281207	0.000103017	0.000250581	3.06265e-05
20023	Céleri branche, cru		17.6	93.4	0.63	2.41	1.3	0.18	2.2	0.25	0.005	0.005	0.005	0	74.6	0.04	79	11	24	390	46	0.08	0.06	0.03	0.09	10	10	0.0138518	5.76178	0.000495833	0.00189676	0.00102315	0.000141666	0.00173148	0.000196759	3.93518e-06	3.93518e-06	3.93518e-06	0	0.0587129	3.14814e-05	0.0621759	0.0086574	0.0188889	0.306944	0.0362037	6.29629e-05	4.72222e-05	2.36111e-05
20024	Céleri branche, cuit		12.8	94.1	0.83	1.2	1.2	0	1.6	0.16	0.04	0.03	0.075	0	313	0.35	91	9	25	284	53.3	0.11	0.42	0.059	0.077	1.29	0.3	0.0652253	5.80496	0.00422945	0.00611487	0.00611487	0	0.00815316	0.000815316	0.000203829	0.000152872	0.000382179	0	1.59496	0.0017835	0.463711	0.0458615	0.127393	1.44719	0.271602	0.00056053	0.0021402	0.000300648
20025	Céleri-rave, cuit		26.2	91	0.94	4.32	1.2	0.18	2.6	0.3	0.09	0.05	0.11	0	7.35	1.13	37	10	38	300	41	0.16	0.27	0.11	0.17	10	10	0.181573	5.61372	0.00651446	0.0299388	0.00831633	0.00124745	0.0180187	0.00207908	0.000623725	0.000346514	0.000762331	0	0.0509375	0.00783121	0.25642	0.0693028	0.263351	2.07908	0.284141	0.00110884	0.00187118	0.000762331
20026	Endive, crue		23.5	93.7	1.13	4.38	3.2	0.18	0.25	0.15	0.005	0.005	0.005	0	16.5	0.04	2.5	10	27	180	27	0.09	0.23	0.07	0.18	10	10	0.996031	5.78028	0.0478942	0.185643	0.13563	0.00762917	0.0105961	0.00635764	0.000211921	0.000211921	0.000211921	0	0.699341	0.00169537	0.105961	0.423843	1.14438	7.62917	1.14438	0.00381459	0.00974838	0.0029669
20027	Épinard, cuit		28.1	91.9	3.38	0.43	0	0.18	3.5	0.7	0.13	0.07	0.44	0	6680	3.98	12	30	30	160	240	0.81	1.3	0.14	0.79	10	10	0.295151	5.66924	0.0355022	0.00451655	0	0.00189065	0.0367626	0.00735253	0.00136547	0.000735253	0.00462159	0	70.1641	0.0418044	0.126043	0.315108	0.315108	1.68058	2.52087	0.00850792	0.0136547	0.00147051
20028	Fenouil, cru		21.8	92.9	1	2.63	2.2	0.18	2.6	0.25	0.005	0.005	0.005	0	8.01	0.04	22	11	28	320	37	0.1	0.2	0.08	0.19	10	10	0.0168195	5.73093	0.000771535	0.00202914	0.00169738	0.000138876	0.00200599	0.000192884	3.85767e-06	3.85767e-06	3.85767e-06	0	0.00617999	3.08614e-05	0.0169738	0.00848688	0.021603	0.246891	0.0285468	7.71535e-05	0.000154307	6.17228e-05
20029	Haricot mungo germé ou pousse de ""soja"", appertisé, égoutté		19.7	95.8	1.56	2.36	1.78	0.4	1.63	0.12	0.058	0.008	0.02	0	2	0.065	141	7.53	26	31.5	13.4	0.039	0.26	0.047	0.11	5	2.55	0.145347	5.90983	0.0115097	0.0174121	0.0131329	0.00295121	0.0120262	0.000885363	0.000427925	5.90242e-05	0.000147561	0	0.0147561	0.000479572	1.0403	0.0555565	0.191829	0.232408	0.0988655	0.000287743	0.00191829	0.000346767
20030	Haricot vert, cuit		28	90.8	1.75	3.39	2.5	0.18	3.2	0.15	0.005	0.005	0.005	0	407	0.1	2.5	26	38	260	51	0.19	0.54	0.07	0.22	10	10	2.28925	5.60138	0.143078	0.277163	0.204397	0.0147166	0.261629	0.0122638	0.000408795	0.000408795	0.000408795	0	33.2759	0.00817589	0.204397	2.12573	3.10684	21.2573	4.16971	0.0155342	0.0441498	0.00572313
20031	Laitue, crue		14.7	95.3	1.3	1.33	0.73	0	1.2	0.2	0.021	0.0067	0.085	0	3640	0.18	8.47	14.9	29.5	200	64.6	0.4	0.98	0.036	0.2	2.33	1.22	0.562216	5.87898	0.0497198	0.0508672	0.0279196	0	0.0458952	0.0076492	0.000803166	0.000256248	0.00325091	0	139.215	0.00688428	0.323944	0.569866	1.12826	7.6492	2.47069	0.0152984	0.0374811	0.00137686
20033	Navet, cuit		21.1	94.2	0.75	3.23	2.8	0.18	2.1	0.15	0.005	0.005	0.005	0	2.5	0.04	10	5.8	20	170	32	0.04	0.08	0.06	0.06	10	10	0.404546	5.81113	0.0143796	0.0619281	0.0536838	0.0034511	0.0402629	0.00287592	9.5864e-05	9.5864e-05	9.5864e-05	0	0.047932	0.000766912	0.191728	0.111202	0.383456	3.25938	0.61353	0.000766912	0.00153382	0.00115037
20034	Oignon, cru		37.8	89	1.19	6.39	0.2	0.18	2.6	0.15	0.005	0.005	0.005	0	0	0	2.52	5.4	28	150	13	0.07	0.1	0.04	0.1	2.33	1.45	0.447668	5.49034	0.0140933	0.0756773	0.00236862	0.00213175	0.030792	0.00177646	5.92154e-05	5.92154e-05	5.92154e-05	0	0	0	0.0298446	0.0639526	0.331606	1.77646	0.15396	0.000829016	0.00118431	0.000473723
20035	Oignon, cuit		40.2	88.1	1.56	6.73	5	0.18	2.8	0.15	0.005	0.005	0.005	0	2.5	0.11	2.5	9.3	35	270	32	0.13	0.24	0.08	0.21	10	10	4.62343	5.43482	0.179417	0.774022	0.575054	0.0207019	0.32203	0.0172516	0.000575054	0.000575054	0.000575054	0	0.287527	0.0126512	0.287527	1.0696	4.02538	31.0529	3.68034	0.0149514	0.0276026	0.00920086
20036	Petits pois, appertisés, égouttés		81.5	79.5	5.12	10.7	3.59	4.04	5.75	0.8	0.15	0.066	0.41	0	514	0.21	257	16.3	73.1	71.5	20.6	0.17	1.29	0.079	0.42	1.68	0.9	1.37325	4.90429	0.0862703	0.180291	0.0604903	0.0680727	0.0968856	0.0134797	0.00252745	0.00111208	0.00690837	0	8.66073	0.00353843	4.33037	0.27465	1.23171	1.20475	0.347103	0.00286444	0.0217361	0.00133112
20037	Petits pois, cuits		80.3	77.4	6.38	9.93	1.6	5	4.8	0.6	0.15	0.12	0.27	0	316	0.04	9	29	100	190	38	0.29	1.2	0.14	0.72	10	10	1.38698	4.77475	0.110198	0.171515	0.0276359	0.0863622	0.0829077	0.0103635	0.00259087	0.00207269	0.00466356	0	5.45809	0.000690898	0.155452	0.500901	1.72724	3.28176	0.656353	0.00500901	0.0207269	0.00241814
20038	Pissenlit, cru		48.7	85.3	2.91	6.1	0.71	0.18	2.7	0.85	0.17	0.014	0.31	0	5850	3.44	87.8	13.2	66	397	62.3	0.16	3.1	0.067	0.21	1.1	0.4	0.0122001	5.26209	0.000729001	0.00152815	0.000177866	4.50929e-05	0.000676393	0.000212939	4.25877e-05	3.50722e-06	7.76599e-05	0	1.46552	0.000861775	0.0219953	0.00330681	0.0165341	0.0994548	0.0156071	4.00825e-05	0.000776599	1.67846e-05
20039	Poireau, cru		32.3	87.6	1.49	4.9	3.15	0.18	2.27	0.25	0.05	0.007	0.14	0	1000	0.74	14.5	19	40.3	208	50.7	0.34	1.5	0.087	0.21	0.56	1.1	0.00493301	5.40398	0.00022756	0.000748352	0.000481083	2.74905e-05	0.000346685	3.81812e-05	7.63624e-06	1.06907e-06	2.13815e-05	0	0.152725	0.000113016	0.00221451	0.00290177	0.00615481	0.0317668	0.00774315	5.19265e-05	0.000229087	1.32871e-05
20040	Poireau, cuit		24.2	92	1.1	3	2.11	0.25	3.2	0.2	0.027	0.003	0.11	0	94	0.5	5.8	8.45	20	151	25.6	0.075	0.34	0.12	0.1	5	5	1.03065	5.67541	0.0468476	0.127766	0.0898622	0.0106472	0.136284	0.00851774	0.0011499	0.000127766	0.00468476	0	4.00334	0.0212944	0.247015	0.359875	0.851774	6.4309	1.09027	0.00319415	0.0144802	0.00511065
20041	Poivron, vert, jaune ou rouge, cru		26.4	92.1	0.8	4.55	2.7	0.25	1.5	0.27	0.071	0.02	0.16	1	834	1.44	8.4	11.9	22.5	155	7.7	0.1	0.4	0.05	0.13	0.1	2.5	0.0452913	5.68158	0.00137246	0.00780589	0.00463207	0.000428895	0.00257337	0.000463207	0.000121806	3.43116e-05	0.000274493	0.00171558	1.43079	0.00247044	0.0144109	0.0204154	0.0386006	0.265915	0.01321	0.000171558	0.000686232	8.5779e-05
20045	Radis rouge, cru		14.5	95.5	0.94	1.53	1.1	0.18	1.4	0.25	0.005	0.005	0.005	0	2.5	0.04	16	6.2	20	250	15	0.04	0.4	0.005	0.08	10	10	0.17002	5.89132	0.011022	0.0179401	0.0128981	0.0021106	0.0164157	0.00293138	5.86277e-05	5.86277e-05	5.86277e-05	0	0.0293138	0.000469021	0.187609	0.0726983	0.234511	2.93138	0.175883	0.000469021	0.00469021	5.86277e-05
20046	Salsifis, cuit		57.9	82.8	2.63	9.29	2.3	0.18	4.5	0.15	0.005	0.005	0.005	0	2.5	1.9	8	23	88	170	38	0.21	0.56	0.2	0.49	10	10	0.0273325	5.10787	0.00124153	0.00438547	0.00108575	8.49715e-05	0.00212429	7.08096e-05	2.36032e-06	2.36032e-06	2.36032e-06	0	0.00118016	0.000896921	0.00377651	0.0108575	0.0415416	0.0802508	0.0179384	9.91334e-05	0.000264356	9.44127e-05
20047	Tomate, crue		19.3	94.1	0.86	2.49	2.48	0	1.2	0.26	0.056	0.035	0.12	0	449	0.66	3.22	10.1	26.6	256	8.14	0.066	0.12	0.029	0.087	5	0.2	4.73151	5.80496	0.210834	0.610438	0.607987	0	0.294187	0.0637405	0.0137287	0.00858046	0.0294187	0	110.075	0.161803	0.789402	2.47607	6.52115	62.7599	1.99557	0.0161803	0.0294187	0.00710952
20048	Tomate, pelée, appertisée, égouttée		18.3	94.4	1.07	1.89	1.88	0.0025	1.27	0.28	0.045	0.038	0.13	0	245	0.67	112	9.2	18	190	21.1	0.073	0.77	0.06	0.11	1.1	0.2	2.7178	5.82346	0.15891	0.280691	0.279206	0.000371285	0.188613	0.0415839	0.00668312	0.00564353	0.0193068	0	36.3859	0.0995043	16.6335	1.36633	2.67325	28.2176	3.13364	0.0108415	0.114356	0.00891083
20050	Topinambour, cuit		81.9	80.2	1.8	16	9.6	0.25	2.2	0.7	0	0.004	0.001	0	25	0.19	35.9	14.1	64	452	32.9	0.05	0.2	0.05	0.34	5	5	0.00931395	4.94748	0.000204702	0.00181958	0.00109175	2.84309e-05	0.000250192	7.96064e-05	0	4.54894e-07	1.13723e-07	0	0.00284309	2.16075e-05	0.00408267	0.0016035	0.0072783	0.051403	0.0037415	5.68617e-06	2.27447e-05	5.68617e-06
20052	Artichaut, cru		45.3	84.9	3.2	4.92	0.99	0.6	5.4	0.18	0.036	0.005	0.064	0	8	0.27	60.5	47.8	81.2	387	52	0.26	1.19	0.23	0.49	0.23	0.5	0.0590351	5.23742	0.00417025	0.00641176	0.00129017	0.000781922	0.0070373	0.000234577	4.69153e-05	6.51602e-06	8.34051e-05	0	0.0104256	0.000351865	0.0788439	0.0622932	0.10582	0.50434	0.0677666	0.000338833	0.00155081	0.000299737
20053	Aubergine, crue		21.2	92.9	1.12	2.39	2.39	0	2.7	0.14	0.034	0.016	0.076	0	14	0.17	2.5	12	27.2	235	8.7	0.24	0.32	0.081	0.16	0.2	0.15	0.000585501	5.73093	3.09321e-05	6.60069e-05	6.60069e-05	0	7.45685e-05	3.86651e-06	9.3901e-07	4.41887e-07	2.09896e-06	0	0.000386651	4.69505e-06	6.90449e-05	0.000331415	0.000751208	0.00649022	0.000240276	6.62831e-06	8.83774e-06	2.23705e-06
20055	Céleri-rave, cru		29.3	88.8	1.38	3.98	1.6	0.18	4.5	0.25	0.005	0.005	0.005	0	2.5	0.12	34	13	56	500	40	0.2	0.28	0.11	0.33	10	10	0.175002	5.478	0.00824243	0.0237717	0.00955644	0.0010751	0.0268775	0.00149319	2.98639e-05	2.98639e-05	2.98639e-05	0	0.0149319	0.000716733	0.203074	0.0776461	0.334476	2.98639	0.238911	0.00119456	0.00167238	0.000657005
20056	Champignon de Paris ou champignon de couche, cru		15.9	93.2	1.8	0.83	0.25	0.08	1.97	0.25	0.1	0.0086	0.099	0	299	0.16	5	12.2	33	258	10	0.17	0.8	0.063	0.21	2.33	1.45	0.0351991	5.74944	0.0039848	0.00183744	0.000553444	0.000177102	0.00436114	0.000553444	0.000221378	1.90385e-05	0.000219164	0	0.66192	0.000354204	0.0110689	0.0270081	0.0730547	0.571155	0.0221378	0.000376342	0.00177102	0.000139468
20057	Brocoli, cru		36	88.9	3.95	1.7	1.7	0	2.9	0.48	0.061	0.022	0.16	0	361	1.04	19	21.9	76.5	357	45.9	0.4	0.76	0.059	0.4	0.6	0.8	0.0028513	5.48417	0.000312851	0.000134645	0.000134645	0	0.000229688	3.80174e-05	4.83137e-06	1.74246e-06	1.26725e-05	0	0.0285922	8.23709e-05	0.00150485	0.00173454	0.00605902	0.0282754	0.00363541	3.16811e-05	6.01941e-05	4.67297e-06
20058	Chou de Bruxelles, cru		49.7	85	3.98	5.67	2.2	1	3.95	0.4	0.07	0.019	0.23	0	450	0.89	16.5	23.5	76.4	436	32.3	0.3	1.15	0.062	0.43	1.1	0.25	0.0262714	5.24359	0.00210382	0.00299715	0.00116292	0.000528599	0.00208796	0.000211439	3.70019e-05	1.00434e-05	0.000121578	0	0.237869	0.000470453	0.00872188	0.0124221	0.0403849	0.230469	0.0170737	0.00015858	0.000607888	3.27731e-05
20059	Épinard, cru		28.7	91.6	2.62	2.25	0.32	1.93	2.37	0.5	0.064	0.021	0.26	0	5630	2.47	66.7	52.5	45.2	504	114	1.3	3.61	0.1	0.82	0.1	3.4	0.00475943	5.65073	0.000434484	0.000373126	5.30668e-05	0.000320059	0.000393026	8.29168e-05	1.06134e-05	3.48251e-06	4.31168e-05	0	0.933644	0.000409609	0.0110611	0.00870627	0.00749568	0.0835802	0.018905	0.000215584	0.00059866	1.65834e-05
20060	Épinard, appertisé, égoutté		24.1	91.8	2.81	0.93	0.4	0.18	2.4	0.5	0.081	0.013	0.21	0	5880	1.25	322	76	44	346	127	0.6	2.3	0.18	0.46	1.35	2.79	0.0411708	5.66307	0.00480042	0.00158875	0.000683333	0.0003075	0.0041	0.000854166	0.000138375	2.22083e-05	0.00035875	0	10.045	0.00213542	0.550083	0.129833	0.0751666	0.591083	0.216958	0.001025	0.00392917	0.0003075
20062	Haricot vert, appertisé, égoutté		23.1	92.6	1.33	2.07	0.77	1	3.36	0.31	0.09	0.014	0.19	0	122	0.14	261	13	25.3	94	42.7	0.094	0.81	0.13	0.23	0.9	1.6	0.807214	5.71242	0.046476	0.0723348	0.0269071	0.0349443	0.117413	0.0108327	0.00314499	0.000489221	0.00663942	0	4.26321	0.00489221	9.12047	0.454276	0.884092	3.28477	1.49212	0.00328477	0.0283049	0.00454276
20063	Haricot beurre, appertisé, égoutté		23.8	92.8	1.22	3.48	0.86	1.47	1.68	0.23	0.022	0.004	0.051	0	63	0.29	265	15	19	104	25	0.2	0.9	0.044	0.3	0.43	0.6	0.0497356	5.72476	0.00254947	0.00727227	0.00179717	0.00307191	0.00351075	0.000480639	4.59741e-05	8.35893e-06	0.000106576	0	0.131653	0.000606023	0.553779	0.031346	0.0397049	0.217332	0.0522433	0.000417947	0.00188076	9.19483e-05
20064	Navet, pelé, cru		26.2	91.9	0.76	4.7	3.8	0.69	1.9	0.1	0.011	0.006	0.053	0	0	0.03	42	9.5	38.5	237	40	0.1	0.4	0.063	0.25	1.25	0.5	0.0073203	5.66924	0.000212345	0.00131318	0.00106172	0.000192787	0.000530861	2.79401e-05	3.07341e-06	1.6764e-06	1.48082e-05	0	0	8.38202e-06	0.0117348	0.00265431	0.0107569	0.066218	0.011176	2.79401e-05	0.00011176	1.76022e-05
20066	Maïs doux, appertisé, égoutté		106	75.4	2.82	18.4	5.16	13.1	3.1	1.68	0.26	0.27	0.47	0	22	0.29	236	26.9	53.8	224	3.51	0.11	0.35	0.036	0.39	5	0.5	2.71798	4.65137	0.0723086	0.4718	0.132309	0.335901	0.0794881	0.0430774	0.00666675	0.00692316	0.0120514	0	0.564109	0.00743599	6.05135	0.689752	1.3795	5.74366	0.0900011	0.00282055	0.00897447	0.000923088
20067	Artichaut, appertisé, égoutté		39.4	89.9	1.5	6.5	1.5	0.18	3	0.2	0	0.014	0.075	0	209	0.43	320	12.2	33	218	29.2	0.15	0.45	0.079	0.22	10	10	0.0570742	5.54586	0.00217288	0.0094158	0.00217288	0.000260745	0.00434575	0.000289717	0	2.02802e-05	0.000108644	0	0.302754	0.000622891	0.463547	0.0176727	0.0478033	0.315791	0.0422987	0.000217288	0.000651863	0.000114438
20068	Tomate, concentré, appertisé		99.2	72	4.4	17.1	13.3	0.22	4.2	0.53	0.093	0.062	0.2	0	784	5.7	108	63.3	103	1010	45.6	0.05	1.2	0.05	0.05	0.4	4.4	2.9697	4.44163	0.131721	0.511915	0.398156	0.00658604	0.125733	0.0158664	0.0027841	0.00185607	0.00598731	0	23.4702	0.170638	3.23315	1.89498	3.08346	30.2359	1.36511	0.00149683	0.0359238	0.00149683
20069	Chou vert, cru		29	91.8	2.53	1.92	1.92	0	3.08	0.41	0.054	0.014	0.076	0	321	0.16	25.8	18	32.7	231	96.2	0.17	0.93	0.049	0.22	1.86	0.3	0.00531622	5.66307	0.000463794	0.00035197	0.00035197	0	0.000564619	7.51603e-05	9.89916e-06	2.56645e-06	1.39322e-05	0	0.058845	2.93309e-05	0.0047296	0.00329972	0.00599449	0.0423464	0.0176352	3.1164e-05	0.000170486	8.98258e-06
20071	Haricot vert, surgelé, cuit		36.3	91.4	1.95	5.1	1.23	3.61	3.3	0.19	0.042	0.007	0.084	0	334	0.04	1.5	19	29	159	51	0.29	0.68	0.059	0.24	0.4	0.4	1.30167	5.6384	0.0699244	0.182879	0.0441062	0.12945	0.118334	0.00681315	0.00150606	0.000251011	0.00301213	0	11.9768	0.00143435	0.053788	0.681315	1.0399	5.70153	1.82879	0.010399	0.0243839	0.00211566
20076	Asperge, appertisée, égouttée		17.3	94.2	1.58	1.43	1.23	0.084	1.5	0.27	0.085	0.012	0.17	0	493	0.74	291	8.5	35	142	15.8	0.16	1.09	0.076	0.42	0.2	0.7	0.02474	5.81113	0.0022595	0.00204499	0.00175897	0.000120125	0.00214509	0.000386116	0.000121555	1.71607e-05	0.00024311	0	0.70502	0.00105824	0.416148	0.0121555	0.0500521	0.203069	0.022595	0.00022881	0.00155877	0.000108685
20077	Chou de Bruxelles, appertisé, égoutté		37.4	88.9	2.5	4.1	2.5	0.18	3.3	0.53	0.078	0.058	0.29	0	465	0.69	222	12.2	53	252	26.3	0.1	0.7	0.03	0.2	1.5	1	0.0124655	5.48417	0.000833252	0.00136653	0.000833252	5.99941e-05	0.00109989	0.000176649	2.59975e-05	1.93314e-05	9.66572e-05	0	0.154985	0.000229978	0.0739928	0.00406627	0.0176649	0.0839918	0.00876581	3.33301e-05	0.000233311	9.99902e-06
20078	Céleri branche, appertisé, égoutté		13.1	95	0.63	1.38	0.8	0.18	2	0.15	0.1	0.0079	0.042	0	56	0.43	213	8	33	281	29.2	0.11	0.45	0.04	0.14	1	0.2	0.0243495	5.86048	0.00117101	0.00256507	0.00148699	0.000334574	0.00371749	0.000278811	0.000185874	1.46841e-05	7.80672e-05	0	0.10409	0.00079926	0.395912	0.0148699	0.0613385	0.522307	0.0542753	0.000204462	0.000836434	7.43497e-05
20079	Champignon de Paris ou champignon de couche, appertisé, égoutté		19.4	92.9	2.23	0.7	0	0.2	2.5	0.37	0.065	0.006	0.27	0	10	0	251	4.85	47	72.1	22.2	0.027	0.9	0.17	0.44	0.5	2.5	0.237141	5.73093	0.027259	0.00855663	0	0.00244475	0.0305594	0.00452279	0.000794545	7.33426e-05	0.00330042	0	0.122238	0	3.06816	0.0592852	0.574517	0.881333	0.271368	0.000330042	0.0110014	0.00207804
20081	Salsifis, appertisé, égoutté		28	91.5	1.25	4.25	1	2.5	2.5	0.15	0.07	0.011	0.056	0	19	0.43	235	8.9	33	173	21	0.15	0.45	0.079	0.22	0.6	0.2	0.0289618	5.64457	0.00129294	0.00439599	0.00103435	0.00258587	0.00258587	0.000155152	7.24045e-05	1.13778e-05	5.79236e-05	0	0.0196526	0.00044477	0.243072	0.00920571	0.0341335	0.178942	0.0217213	0.000155152	0.000465457	8.17136e-05
20085	Poivron vert, cru		26	93	0.81	3.43	3	0.18	3.2	0.25	0.005	0.005	0.005	0	154	0.28	2.5	7.7	17	160	6.2	0.07	0.22	0.04	0.11	10	10	0.0332866	5.7371	0.001037	0.00439127	0.00384076	0.000230445	0.00409681	0.000320063	6.40126e-06	6.40126e-06	6.40126e-06	0	0.197159	0.000358471	0.00320063	0.00985794	0.0217643	0.20484	0.00793756	8.96177e-05	0.000281655	5.12101e-05
20086	Poivron vert, cuit		17.3	91.9	0.92	2.36	2.36	0	1.2	0.2	0.029	0.013	0.11	0	264	0.5	2	10	18	166	9	0.12	0.46	0.065	0.12	0	1	0.068853	5.66924	0.00366155	0.00939267	0.00939267	0	0.00477593	0.000795989	0.000115418	5.17393e-05	0.000437794	0	1.0507	0.00198997	0.00795989	0.0397994	0.071639	0.660671	0.0358195	0.000477593	0.00183077	0.000258696
20087	Poivron rouge, cru		36.6	90.2	1.06	5.98	4.8	0.18	3.2	0.25	0.005	0.005	0.005	0	554	3.45	2.5	8.2	19	180	4.8	0.08	0.21	0.04	0.14	10	10	0.0776146	5.56437	0.00224786	0.0126813	0.010179	0.000381711	0.00678598	0.000530155	1.06031e-05	1.06031e-05	1.06031e-05	0	1.17482	0.00731613	0.00530155	0.0173891	0.0402917	0.381711	0.010179	0.000169649	0.00044533	8.48247e-05
20088	Poivron rouge, cuit		40.3	90.2	1.4	7	6	0.18	2.2	0.3	0.1	0.021	0.11	0	209	0.9	17	14	26	180	9	0.1	0.45	0.01	0.2	0	1	1.26767	5.56437	0.0440383	0.220192	0.188736	0.00566207	0.0692031	0.00943678	0.00314559	0.000660575	0.00346015	0	6.57429	0.0283103	0.534751	0.440383	0.817855	5.66207	0.283103	0.00314559	0.0141552	0.000314559
20089	Radis noir, cru		29.2	91.4	0.94	5.52	4.3	0.18	1.2	0.15	0.005	0.005	0.005	0	2.5	0.04	23	10	32	300	39	0.06	0.23	0.01	0.15	10	10	0.0931396	5.6384	0.00299833	0.0176072	0.0137158	0.000574148	0.00382765	0.000478457	1.59486e-05	1.59486e-05	1.59486e-05	0	0.00797428	0.000127588	0.0733634	0.0318971	0.102071	0.956913	0.124399	0.000191383	0.000733634	3.18971e-05
20090	Scarole, crue		14.2	93.8	1.25	0.3	0.23	0.067	3.1	0.2	0.048	0.004	0.088	0	1500	0	22	15	28	314	52	0.42	0.83	0.099	0.79	0.6	0.4	0.0471954	5.78645	0.00415452	0.000997085	0.000764432	0.000222682	0.0103032	0.000664723	0.000159534	1.32945e-05	0.000292478	0	4.98543	0	0.0731196	0.0498543	0.0930613	1.04362	0.172828	0.00139592	0.0027586	0.000329038
20091	Betterave rouge, crue		50.2	86.7	1.74	9.1	6.76	0.18	2.55	0.24	0.038	0.029	0.094	0	20	0.06	60.5	19	38.1	328	22.1	0.46	0.7	0.098	0.54	0.2	0.5	0.242521	5.34846	0.0084061	0.0439629	0.0326582	0.000869596	0.0123193	0.00115946	0.000183581	0.000140102	0.000454122	0	0.0966218	0.000289865	0.292281	0.0917907	0.184065	1.5846	0.106767	0.0022223	0.00338176	0.000473447
20094	Chou-rave, bouilli/cuit à l'eau		27.6	90.3	1.8	4.4	2.8	0.18	1.1	0.11	0.014	0.008	0.053	0	21	0.52	21	19	45	340	25	0.14	0.4	0.13	0.31	10	10	0.00519117	5.57054	0.000338555	0.000827578	0.000526641	3.38555e-05	0.000206895	2.06895e-05	2.6332e-06	1.50469e-06	9.96856e-06	0	0.00394981	9.78047e-05	0.00394981	0.00357363	0.00846387	0.0639492	0.00470215	2.6332e-05	7.52344e-05	2.44512e-05
20095	Chou rouge, bouilli/cuit à l'eau		25.3	90.8	1.51	3.32	3.32	0	2.6	0.09	0.011	0.007	0.043	0	20	0.12	28	11.8	33	262	54.6	0.16	0.66	0.034	0.14	1.48	1.35	0.017076	5.60138	0.00101916	0.0022408	0.0022408	0	0.00175485	6.07447e-05	7.42435e-06	4.72459e-06	2.90225e-05	0	0.0134988	8.09929e-05	0.0188983	0.0079643	0.0222731	0.176835	0.0368518	0.000107991	0.000445461	2.2948e-05
20096	Potiron, cuit		25.5	92	0.81	4.5	3.1	0.6	2	0.07	0.037	0.009	0.004	0	6020	0.24	2.5	6.9	21	230	13	0.04	0.18	0.04	0.1	10	10	0.602278	5.67541	0.0191312	0.106284	0.0732181	0.0141712	0.0472375	0.00165331	0.000873893	0.000212569	9.4475e-05	0	142.185	0.0056685	0.0590468	0.162969	0.495994	5.43231	0.307044	0.00094475	0.00425137	0.00094475
20097	Échalote, crue		63.6	82.3	1.81	12.2	3.3	0.18	2.6	0.25	0.005	0.005	0.005	0	2.5	0.04	5	7.5	46	220	9.5	0.08	0.12	0.07	0.2	10	10	0.122599	5.07702	0.00348907	0.0235175	0.00636129	0.000346979	0.00501193	0.000481916	9.63832e-06	9.63832e-06	9.63832e-06	0	0.00481916	7.71065e-05	0.00963832	0.0144575	0.0886725	0.424086	0.0183128	0.000154213	0.00023132	0.000134936
20099	Mâche, crue		16.8	93.7	2	0.5	0	0.18	2.3	0.25	0.005	0.005	0.005	0	3280	0.22	2.5	19	30	330	41	0.28	0.4	0.1	0.14	10	10	0.166052	5.78028	0.0197681	0.00494202	0	0.00177913	0.0227333	0.00247101	4.94202e-05	4.94202e-05	4.94202e-05	0	32.4197	0.00217449	0.0247101	0.187797	0.296521	3.26173	0.405246	0.00276753	0.00395362	0.000988404
20102	Champignon de Paris ou champignon de couche, bouilli/cuit à l'eau		28.7	91.1	2.17	3	2.34	0.18	2.2	0.47	0.061	0.008	0.18	0	0	0.01	2	12	87	356	6	0.12	1.74	0.5	0.87	11.9	10	0.0428392	5.61989	0.00323906	0.00447796	0.00349281	0.000268678	0.00328384	0.000701548	9.10519e-05	1.19412e-05	0.000268678	0	0	1.49265e-05	0.00298531	0.0179119	0.129861	0.531385	0.00895593	0.000179119	0.00259722	0.000746327
20103	Champignon, chanterelle ou girolle, crue		33.1	88.7	2.28	2.3	1.87	0	4.23	0.78	0.5	0.022	0.26	0	299	0.06	5	10	53.5	449	8.33	0.28	3.52	0.39	0.84	0.9	3.3	0.00832175	5.47184	0.00057322	0.000578248	0.000470141	0	0.00106347	0.000196102	0.000125706	5.53107e-06	6.53672e-05	0	0.0751723	1.50847e-05	0.00125706	0.00251412	0.0134506	0.112884	0.00209426	7.03954e-05	0.000884971	9.80508e-05
20105	Champignon, morille, crue		24.5	89.6	3.16	0.1	0.044	0	3.35	0.54	0.16	0.029	0.24	0	0	0.05	21	19	194	411	43	0.59	1.2	0.63	2.03	2.33	1.45	0.00134929	5.52736	0.000174031	5.5073e-06	2.42321e-06	0	0.000184495	2.97394e-05	8.81168e-06	1.59712e-06	1.32175e-05	0	0	2.75365e-06	0.00115653	0.00104639	0.0106842	0.022635	0.00236814	3.24931e-05	6.60876e-05	3.4696e-05
20111	Oseille, crue		23.2	93	1.84	1.6	1.54	0.055	1.8	0.65	0.1	0.04	0.26	0	299	0.16	4	103	63	390	44	0.35	2.4	0.13	0.2	0.9	0.4	0.0115114	5.7371	0.000912976	0.000793892	0.000764121	2.729e-05	0.000893129	0.000322519	4.96183e-05	1.98473e-05	0.000129007	0	0.148359	7.93892e-05	0.00198473	0.0511068	0.0312595	0.193511	0.021832	0.000173664	0.00119084	6.45037e-05
20114	Champignon, pleurote, crue		25.5	89.2	3.06	1.5	0.71	0	2.4	0.36	0.062	0.031	0.12	0	29	0	13.5	18	120	420	5	0.11	1.17	0.24	0.77	2.33	1.45	0.00088659	5.50268	0.000106391	5.21523e-05	2.46854e-05	0	8.34437e-05	1.25166e-05	2.15563e-06	1.07782e-06	4.17219e-06	0	0.00100828	0	0.000469371	0.000625828	0.00417219	0.0146027	0.000173841	3.82451e-06	4.06788e-05	8.34437e-06
20116	Chou blanc, cru		23.5	92.9	1	3.23	2.8	0.18	2.7	0.15	0.005	0.005	0.005	0	2.5	0.64	7	6.4	19	120	42	0.08	0.19	0.07	0.07	10	10	0.12988	5.73093	0.00552681	0.0178516	0.0154751	0.000994826	0.0149224	0.000829022	2.76341e-05	2.76341e-05	2.76341e-05	0	0.013817	0.00353716	0.0386877	0.0353716	0.105009	0.663218	0.232126	0.000442145	0.00105009	0.000386877
20118	Fenouil, bouilli/cuit à l'eau		12.2	94.4	1.13	0.8	0.5	0.3	2	0.05	0.02	0.014	0.03	0	14	0.32	58.1	10.2	17.3	270	43	0.14	0.2	0.16	0.18	1.8	10	0.0187964	5.82346	0.00174098	0.00123255	0.000770343	0.000462206	0.00308137	7.70343e-05	3.08137e-05	2.15696e-05	4.62206e-05	0	0.0215696	0.00049302	0.0895139	0.015715	0.0266539	0.415985	0.0662495	0.000215696	0.000308137	0.00024651
20119	Tomate verte, crue		24.8	93	1.2	4	4	0	1.1	0.2	0.028	0.03	0.081	0	346	0.38	13	10	28	204	13	0.1	0.51	0.09	0.07	2.33	1.45	0.00219444	5.7371	0.000106183	0.000353942	0.000353942	0	9.73341e-05	1.76971e-05	2.47759e-06	2.65457e-06	7.16733e-06	0	0.030616	3.36245e-05	0.00115031	0.000884855	0.00247759	0.018051	0.00115031	8.84855e-06	4.51276e-05	7.9637e-06
20121	Épinard, surgelé, cuit		33.3	88.9	4.01	0.51	0.51	0	3.7	0.87	0.16	0	0.37	0	7240	3.54	97	82	50	302	153	0.72	1.96	0.16	0.49	10	10	0.434835	5.48417	0.0523631	0.00665964	0.00665964	0	0.0483151	0.0113606	0.0020893	0	0.00483151	0	94.5408	0.0462258	1.26664	1.07077	0.652906	3.94355	1.99789	0.00940185	0.0255939	0.0020893
20124	Petits pois, surgelés, cuits		65.8	79.5	5.15	7.95	4.65	3.3	5.5	0.27	0.049	0.024	0.13	0	1250	0.03	72	22	77	110	24	0.28	1.52	0.11	0.67	1	10	0.209991	4.90429	0.0164355	0.0253713	0.0148398	0.0105315	0.0175525	0.000861666	0.000156376	7.65926e-05	0.000414876	0	3.9892	9.57407e-05	0.229778	0.0702098	0.245734	0.351049	0.0765926	0.00089358	0.00485086	0.000351049
20125	Champignon de Paris ou champignon de couche, sauté/poêlé, sans matière grasse		38.4	88.4	4.44	4.53	0	0.18	0.9	0.6	0.18	0.16	0.18	0	2.5	0.04	11	14	140	540	2.7	0.05	0.31	0.39	0.81	10	10	0.504389	5.45333	0.0583199	0.0595021	0	0.00236432	0.0118216	0.00788107	0.00236432	0.00210162	0.00236432	0	0.0328378	0.000525405	0.144486	0.183892	1.83892	7.09297	0.0354648	0.000656756	0.00407189	0.0051227
20128	Courge musquée, pulpe, crue		23.1	93.3	0.55	4.6	1.88	0.95	1	0.1	0.017	0.0035	0.04	0	299	0.16	13	6.25	18.3	235	18.3	0.17	0.43	0.063	0.21	2.33	0.5	0.0266181	5.75561	0.000633764	0.00530057	0.00216632	0.00109468	0.0011523	0.00011523	1.95891e-05	4.03304e-06	4.60919e-05	0	0.344537	0.000184368	0.0149799	0.00720186	0.021087	0.27079	0.021087	0.000195891	0.000495488	7.25948e-05
20132	Potimarron, pulpe, cru		38.2	88.9	1.06	6.88	3.5	1.2	1.8	0.3	0.08	0.14	0.07	0	5310	1.52	2.5	8.5	27	330	18	0.06	0.19	0.08	0.24	10	10	0.0846885	5.48417	0.00235	0.0152528	0.00775942	0.00266037	0.00399056	0.000665093	0.000177358	0.000310377	0.000155188	0	11.7721	0.0033698	0.00554244	0.0188443	0.0598584	0.731602	0.0399056	0.000133019	0.000421226	0.000177358
20133	Panais, cuit		67.8	80.2	1.32	13.4	4.8	0.18	3.6	0.3	0.05	0.11	0.047	0	0	1	10	29	69	367	37	0.29	0.58	0.14	0.26	10	10	0.0857914	4.94748	0.00167028	0.0169558	0.00607373	0.000227765	0.0045553	0.000379608	6.3268e-05	0.00013919	5.94719e-05	0	0	0.00126536	0.0126536	0.0366955	0.0873099	0.464387	0.0468183	0.000366955	0.000733909	0.00017715
20139	Courge, crue		14.9	92.3	1.1	1.6	1.6	0	1.3	0.17	0.037	0.013	0.077	0	820	0.12	4.5	16.5	30.5	312	28.5	0.17	0.6	0.061	0.26	0.24	0.15	0.0153668	5.69392	0.00113446	0.00165013	0.00165013	0	0.00134073	0.000175326	3.81592e-05	1.34073e-05	7.94124e-05	0	0.845691	0.00012376	0.00464099	0.0170169	0.0314556	0.321775	0.0293929	0.000175326	0.000618798	6.29111e-05
20151	Piment, cru		44.3	87.9	1.87	7.7	5.3	2.3	1.65	0.32	0.031	0.018	0.17	0	534	0.69	8	24	55.3	331	14	0.21	1.12	0.15	0.28	2.33	1.45	0.0918511	5.42248	0.00387723	0.0159651	0.010989	0.00476879	0.00342109	0.000663484	6.4275e-05	3.7321e-05	0.000352476	0	1.10719	0.00143064	0.0165871	0.0497613	0.114658	0.686291	0.0290274	0.000435411	0.00232219	0.000311008
20156	Artichaut, fond, appertisé, égoutté		25.2	91.3	1.2	3.02	0.8	0.18	2.6	0.25	0.005	0.005	0.005	0	10.7	0.42	293	20	26	140	36	0.05	0.36	0.06	0.2	10	10	0.00173065	5.63223	8.24119e-05	0.000207403	5.49413e-05	1.23618e-05	0.000178559	1.71691e-05	3.43383e-07	3.43383e-07	3.43383e-07	0	0.000734839	2.88442e-05	0.0201222	0.00137353	0.00178559	0.00961472	0.00247236	3.43383e-06	2.47236e-05	4.12059e-06
20160	Champignon, cèpe, cru		31.6	90.3	3.13	3.03	1.7	0.2	1.93	0.43	0.071	0	0.27	0	299	0.04	5	12	129	361	23	0.17	1	0.23	0.4	0	1.45	0.0452512	5.57054	0.00448216	0.00433896	0.0024344	0.0002864	0.00276376	0.000615761	0.000101672	0	0.00038664	0	0.428168	5.72801e-05	0.00716001	0.017184	0.184728	0.516952	0.032936	0.00024344	0.001432	0.00032936
20162	Chicorée rouge, crue		18.9	94	1.4	1.6	1.6	0	3	0.1	0.02	0	0.05	0	299	0.57	7	12.2	30	180	36	0.17	0.3	0.063	0.2	2.33	1.45	0.0258503	5.79879	0.00191484	0.00218838	0.00218838	0	0.00410322	0.000136774	2.73548e-05	0	6.8387e-05	0	0.408954	0.000779611	0.00957418	0.0166864	0.0410322	0.246193	0.0492386	0.000232516	0.000410322	8.61676e-05
20165	Rutabaga, cuit		26	91.5	0.93	4.26	3.95	0.31	1.8	0.18	0.029	0.027	0.095	0	1	0.24	5	10	41	216	18	0.097	0.18	0.029	0.12	10	10	0.00590918	5.64457	0.000211367	0.000968196	0.000897741	7.04556e-05	0.000409097	4.09097e-05	6.59101e-06	6.13645e-06	2.15912e-05	0	0.000227276	5.45463e-05	0.00113638	0.00227276	0.00931832	0.0490916	0.00409097	2.20458e-05	4.09097e-05	6.59101e-06
20167	Chou chinois ou pak-choi ou pé-tsai, cru		15.6	95.2	1.38	1.65	1.18	0.18	1.05	0.2	0.031	0.017	0.09	0	2680	0.11	51	17.5	37.8	249	86.4	0.17	0.68	0.021	0.17	0.29	0.3	0.00874332	5.87282	0.000773448	0.000924775	0.000661354	0.000100884	0.000588493	0.000112094	1.73746e-05	9.52798e-06	5.04422e-05	0	1.50206	6.16516e-05	0.0285839	0.00980821	0.0211857	0.139557	0.0484246	9.52798e-05	0.000381119	1.17699e-05
20168	Poivron jaune, cru		30.7	91.9	0.94	4.73	4.3	0.18	1.2	0.3	0.11	0.11	0.07	0	642	1.76	2.5	12	23	220	8.6	0.11	0.21	0.07	0.23	10	10	0.015381	5.66924	0.000470948	0.00236977	0.00215434	9.01816e-05	0.000601211	0.000150303	5.5111e-05	5.5111e-05	3.50706e-05	0	0.321648	0.000881776	0.00125252	0.00601211	0.0115232	0.110222	0.00430868	5.5111e-05	0.000105212	3.50706e-05
20169	Tomate, pulpe, appertisée		26.1	93	1.2	3.63	3.2	0.18	1.8	0.25	0.005	0.005	0.005	0	1980	1.3	27.1	11	20	260	20	0.08	0.39	0.08	0.09	10	10	0.904546	5.7371	0.0415883	0.125805	0.110902	0.00623825	0.0623825	0.00866423	0.000173285	0.000173285	0.000173285	0	68.6207	0.045054	0.939203	0.381226	0.693139	9.0108	0.693139	0.00277255	0.0135162	0.00277255
20170	Tomate, purée, appertisée		47.1	85.6	1.4	7.54	3.64	0.18	2.38	0.4	0.085	0.057	0.23	0	209	2.3	239	30	41.9	798	19.9	0.16	0.6	0.15	0.2	0.4	2.2	1.93518	5.2806	0.0575213	0.309793	0.149555	0.00739559	0.0977862	0.0164347	0.00349236	0.00234194	0.00944992	0	8.58711	0.0944992	9.8197	1.2326	1.72153	32.7871	0.817624	0.00657386	0.024652	0.00616299
20171	Laitue romaine, crue		16.6	94.6	1.24	1.2	1.19	0	2.1	0.3	0.04	0.012	0.16	0	5230	0.13	8	14	30	247	33	0.16	0.97	0.048	0.23	1	1.25	0.00473547	5.8358	0.000353734	0.000342323	0.000339471	0	0.000599066	8.55808e-05	1.14108e-05	3.42323e-06	4.56431e-05	0	1.49196	3.7085e-05	0.00228216	0.00399377	0.00855808	0.0704616	0.00941389	4.56431e-05	0.000276711	1.36929e-05
20172	Tomate cerise, crue		33.7	90.1	1.31	5.62	4.8	0.18	1.2	0.25	0.005	0.005	0.005	0	1360	0.4	2.5	11	31	330	6.6	0.16	0.37	0.05	0.18	10	10	0.868257	5.5582	0.0337512	0.144795	0.123669	0.00463757	0.0309172	0.00644107	0.000128821	0.000128821	0.000128821	0	35.0394	0.0103057	0.0644107	0.283407	0.798693	8.50222	0.170044	0.00412229	0.00953279	0.00128821
20180	Oignon, séché		348	3.93	8.95	75	37.4	0	9.2	0.46	0.078	0.064	0.18	0	11	0.18	170	92	303	1620	257	1.39	1.55	0.42	1.89	5.5	0	0.308381	0.242439	0.00793106	0.0664614	0.0331421	0	0.0081526	0.00040763	6.91199e-05	5.67138e-05	0.000159507	0	0.00974768	0.000159507	0.150646	0.081526	0.268504	1.43557	0.227741	0.00123175	0.00137354	0.000372184
20183	Haricot mungo germé ou pousse de ""soja"", cru		29.5	91.7	2.57	3.4	3.4	0	1.7	0.25	0.0001	0.0001	0.0001	0	5	0.095	17.1	16	43	120	16	0.12	0.44	0.1	0.32	25	10	0.00711741	5.6569	0.000620059	0.000820312	0.000820312	0	0.000410156	6.0317e-05	2.41268e-08	2.41268e-08	2.41268e-08	0	0.00120634	2.29205e-05	0.00412569	0.00386029	0.0103745	0.0289522	0.00386029	2.89522e-05	0.000106158	2.41268e-05
20188	Bambou, pousses, appertisées, égouttées		17.5	95	1.61	1.9	1.15	0.18	1.25	0.15	0.041	0.004	0.078	0	8	0.63	74.1	3.5	26.8	196	17	0.14	0.24	0.098	0.56	10	10	0.00210148	5.86048	0.000193336	0.000228161	0.000138097	2.16152e-05	0.000150106	1.80127e-05	4.92347e-06	4.80339e-07	9.36661e-06	0	0.000960678	7.56534e-05	0.00889828	0.000420296	0.00321827	0.0235366	0.00204144	1.68119e-05	2.88203e-05	1.17683e-05
20189	Tomate, séchée		272	14.6	14.2	43.3	37.6	0	12.3	2.99	0.46	0.53	1.21	0	524	0.01	247	194	356	3430	110	1.85	9.09	1.42	1.99	5.5	0	0.253933	0.900663	0.0132568	0.0404239	0.0351025	0	0.011483	0.0027914	0.000429446	0.000494796	0.00112963	0	0.489195	9.33578e-06	0.230594	0.181114	0.332354	3.20217	0.102694	0.00172712	0.00848622	0.00132568
20194	Haricots blancs à la sauce tomate, appertisés		73.7	78.9	4.67	10.1	1.65	2.9	5.5	0.4	0.16	0.14	0.059	0	182	1.56	349	18	99	214	57	0.13	0.72	0.078	0.59	10	10	0.194817	4.86728	0.0123446	0.0266982	0.00436158	0.00766581	0.0145386	0.00105735	0.000422941	0.000370074	0.00015596	0	0.481096	0.00412368	0.922541	0.0475809	0.261695	0.565684	0.150673	0.00034364	0.00190324	0.000206184
20200	Laitue iceberg, crue		17.4	95.6	1.01	2.45	1.48	0.18	1.15	0.18	0.023	0.0063	0.088	0	299	0.22	9.48	8.73	23.6	179	17.4	0.19	0.43	0.029	0.21	0.15	0.6	0.0749202	5.89749	0.00434882	0.0105491	0.00637252	0.000775037	0.00495162	0.000775037	9.90325e-05	2.71263e-05	0.000378907	0	1.28742	0.000947267	0.0408186	0.0375893	0.101616	0.770731	0.0749202	0.000818094	0.00185148	0.000124867
20205	Brocoli, surgelé, cuit		28.4	90.7	3.1	2.36	1.47	0.18	3	0.11	0.018	0.008	0.055	0	597	1.32	24	20	55	180	51	0.33	0.61	0.043	0.3	10	10	0.173705	5.59521	0.0189607	0.0144346	0.00899106	0.00110095	0.0183491	0.0006728	0.000110095	4.89309e-05	0.0003364	0	3.65147	0.0080736	0.146793	0.122327	0.3364	1.10095	0.311935	0.0020184	0.00373098	0.000263004
20207	Chou de Bruxelles, surgelé, cuit		42.8	86.7	3.64	4.22	2.08	0.18	4.1	0.39	0.081	0.03	0.2	0	555	0.51	15	18	56	290	26	0.21	0.48	0.034	0.24	10	10	0.0382389	5.34846	0.00325209	0.00377029	0.00185834	0.000160818	0.00366307	0.000348439	7.2368e-05	2.6803e-05	0.000178686	0	0.495855	0.000455651	0.0134015	0.0160818	0.0500322	0.259095	0.0232292	0.000187621	0.000428848	3.03767e-05
20210	Concombre, pulpe, cru		14.7	96.3	0.56	2.23	1.8	0.18	0.8	0.25	0.005	0.005	0.005	0	24.3	0.04	2.5	8.9	25	140	16	0.11	0.14	0.02	0.13	10	10	0.401091	5.94067	0.0152796	0.0608457	0.0491131	0.00491131	0.0218281	0.00682127	0.000136425	0.000136425	0.000136425	0	0.663027	0.0010914	0.0682127	0.242837	0.682127	3.81991	0.436561	0.00300136	0.00381991	0.000545702
20212	Champignon, lentin comestible ou shiitaké, cuit		60.9	83.5	1.56	12.3	3.84	0.18	2.1	0.22	0.05	0.07	0.034	0	0	0	4	14	29	117	3	0.2	0.44	0.9	1.33	10	10	0.00120568	5.15105	3.08845e-05	0.000243512	7.60234e-05	3.5636e-06	4.15753e-05	4.35551e-06	9.89888e-07	1.38584e-06	6.73124e-07	0	0	0	7.9191e-05	0.000277169	0.000574135	0.00231634	5.93933e-05	3.95955e-06	8.71101e-06	1.7818e-05
20216	Pois mange-tout ou pois gourmand, bouilli/cuit à l'eau		30.5	90.9	2.25	3.39	2.3	0.8	2.8	0.3	0.08	0.07	0.11	0	501	0.59	5	14	40	100	35	0.18	0.46	0.08	0.28	10	10	0.00259571	5.60755	0.000191487	0.000288507	0.000195742	6.80843e-05	0.000238295	2.55316e-05	6.80843e-06	5.95737e-06	9.36159e-06	0	0.0426378	5.02121e-05	0.000425527	0.00119147	0.00340421	0.00851053	0.00297869	1.5319e-05	3.91485e-05	6.80843e-06
20217	Roquette, crue		27.8	91.7	2.58	2.1	2.05	0.021	1.6	0.66	0.086	0.049	0.32	0	1420	0.43	27	47	52	369	160	0.32	1.46	0.076	0.47	2.33	1.45	0.0626415	5.6569	0.00581349	0.00473191	0.00461925	4.73191e-05	0.00360527	0.00148717	0.000193783	0.000110411	0.000721054	0	3.19968	0.000968916	0.0608389	0.105905	0.117171	0.831465	0.360527	0.000721054	0.00328981	0.00017125
20221	Chou chinois (pak-choi ou pé-tsai), cuit		13.4	95.4	1.53	0.75	0.75	0	1.35	0.17	0.029	0.016	0.069	0	2550	0.09	21.5	10.5	34	298	62.5	0.15	0.67	0.024	0.18	10	10	0.0198084	5.88515	0.00226171	0.00110868	0.00110868	0	0.00199562	0.000251301	4.2869e-05	2.36518e-05	0.000101999	0	3.76951	0.000133042	0.0317822	0.0155215	0.0502602	0.440516	0.09239	0.000221736	0.000990421	3.54778e-05
20240	Piperade basquaise		71.4	84.5	1.1	6.5	4.9	1.6	3.4	3.8	2	1.33	0.3	0	1450	1.3	300	7.9	14	190	7.6	0.08	0.24	0.05	0.09	10	10	0.108244	5.21274	0.00166762	0.00985411	0.00742849	0.00242563	0.00515446	0.00576087	0.00303203	0.0020163	0.000454805	0	2.19823	0.00197082	0.454805	0.0119765	0.0212242	0.288043	0.0115217	0.000121281	0.000363844	7.58009e-05
20241	Cardon, cuit		21.6	93.5	0.76	3.63	2.32	0.18	1.7	0.11	0.012	0.02	0.044	0	209	0.43	176	43	23	392	72	0.13	0.73	0.079	0.18	10	10	0.0219964	5.76794	0.000773948	0.00369662	0.00236258	0.000183303	0.0017312	0.000112019	1.22202e-05	2.03671e-05	4.48075e-05	0	0.212836	0.000437892	0.17923	0.0437892	0.0234221	0.399194	0.0733214	0.000132386	0.000743397	8.04498e-05
20242	Tomate, pulpe et peau, bouillie/cuite à l'eau		17	94.3	0.95	2.8	2.49	0	0.7	0.11	0.015	0.016	0.044	0	293	0.56	11	9	28	218	11	0.11	0.68	0.075	0.14	0.18	1.5	1.0186	5.8173	0.0569218	0.16777	0.149195	0	0.0419424	0.00659095	0.000898766	0.000958684	0.00263638	0	17.5559	0.0335539	0.659095	0.53926	1.6777	13.0621	0.659095	0.00659095	0.0407441	0.00449383
20243	Pois mange-tout ou pois gourmands, cuits		46.9	86.6	3.5	5.92	4.82	0.18	3.1	0.38	0.073	0.039	0.17	0	760	0.47	5	28	58	217	59	0.28	2.4	0.09	0.49	10	10	0.0779813	5.34229	0.0058195	0.00984327	0.00801428	0.000299289	0.00515441	0.000631831	0.000121378	6.48459e-05	0.000282661	0	1.26366	0.000781476	0.00831357	0.046556	0.0964374	0.360809	0.0981001	0.00046556	0.00399051	0.000149644
20255	Échalote, cuite		66.9	81.5	2	12.3	3.8	0.18	2.9	0.4	0.12	0.12	0.11	0	5.29	0.04	2.5	11	48	270	22	0.12	0.25	0.09	0.27	10	10	0.0879273	5.02767	0.00262862	0.016166	0.00499437	0.000236576	0.0038115	0.000525723	0.000157717	0.000157717	0.000144574	0	0.00695269	5.25723e-05	0.00328577	0.0144574	0.0630868	0.354863	0.0289148	0.000157717	0.000328577	0.000118288
20256	Tomate, séchée, à l'huile		187	60.4	4.27	13.4	6.5	0	5.63	11.7	1.32	5.88	3.54	0	11	0.01	1020	81	139	1570	47	0.47	2.68	0.47	0.78	5.5	0	0.180866	3.72603	0.00412994	0.0129605	0.00628679	0	0.00544533	0.0113162	0.0012767	0.00568713	0.00342388	0	0.0106392	9.67198e-06	0.986542	0.0783431	0.134441	1.5185	0.0454583	0.000454583	0.00259209	0.000454583
20257	Haricots verts, purée		55.9	87.5	1.7	4.2	1.5	0.18	3.3	2.9	1.9	0.16	0.84	0	209	0.43	17	12.2	33	218	29.2	0.15	0.45	0.079	0.22	10	10	0.0306759	5.39781	0.000932899	0.00230481	0.000823146	9.87775e-05	0.00181092	0.00159142	0.00104265	8.78022e-05	0.000460962	0	0.114692	0.000235968	0.00932899	0.00669492	0.0181092	0.119631	0.0160239	8.23146e-05	0.000246944	4.33523e-05
20258	Légumes (3-4 sortes en mélange), purée		61.8	86	1.94	4.25	2.4	1.6	3.3	3.4	2.17	0.77	0.18	0	1040	0.43	252	18	42	260	47	0.18	0.67	0.12	0.33	10	10	0.474966	5.30528	0.0149099	0.0326635	0.0184453	0.0122969	0.0253623	0.0261308	0.0166776	0.00591787	0.0013834	0	7.99296	0.00330478	1.93676	0.13834	0.322793	1.99824	0.36122	0.0013834	0.00514931	0.000922265
20259	Brocoli, purée		28.8	91.7	2.5	2.75	1.65	0.18	2.39	0.38	0.073	0.027	0.14	0	209	0.43	7.93	12.2	33	218	87	0.15	0.9	0.079	0.22	10	10	0.0143522	5.6569	0.00124585	0.00137044	0.000822261	8.97012e-05	0.00119103	0.000189369	3.63788e-05	1.34552e-05	6.97676e-05	0	0.104153	0.000214286	0.00395184	0.00607975	0.0164452	0.108638	0.0433556	7.4751e-05	0.000448506	3.93689e-05
20261	Carotte, purée		31.5	90.1	0.88	5.06	4.8	0.18	3.1	0.15	0.005	0.005	0.005	10.5	6060	1.16	52	8.4	25	230	30	0.1	0.32	0.06	0.23	10	10	0.157843	5.5582	0.00440959	0.0253552	0.0240523	0.000901962	0.0155338	0.000751635	2.50545e-05	2.50545e-05	2.50545e-05	0.0526145	30.3661	0.00581265	0.260567	0.0420916	0.125273	1.15251	0.150327	0.00050109	0.00160349	0.000300654
20264	Courgette, purée		56.9	86.7	2.8	6.5	2.3	0.18	1.5	1.9	1.3	0.095	0.5	0	209	0.43	220	12.2	33	218	29.2	0.15	0.45	0.079	0.22	10	10	0.0797654	5.34846	0.00392519	0.00911204	0.00322426	0.000252333	0.00210278	0.00266352	0.00182241	0.000133176	0.000700926	0	0.292987	0.000602796	0.308407	0.0171026	0.0462611	0.305604	0.0409341	0.000210278	0.000630833	0.000110746
20269	Haricot plat, cru		32.2	92.2	1.93	4.47	1.3	0.18	2.97	0.12	0	0.0041	0.048	0	299	0.16	2	12.2	33	258	60	0.17	0.8	0.063	0.21	2.33	1.45	0.0704045	5.68775	0.0042199	0.00977355	0.00284242	0.000393566	0.00649383	0.000262377	0	8.96455e-06	0.000104951	0	0.653756	0.000349836	0.00437295	0.026675	0.0721537	0.564111	0.131189	0.000371701	0.00174918	0.000137748
20272	Mesclun ou salade, mélange de jeunes pousses		21.6	93.5	2	2.5	0	0.18	2	0	0	0	0	0	299	0.16	19	12.2	33	258	25	0.17	0.62	0.063	0.21	2.33	1.45	0.0168423	5.76794	0.00155947	0.00194934	0	0.000140352	0.00155947	0	0	0	0	0	0.233141	0.000124758	0.014815	0.00951277	0.0257313	0.201172	0.0194934	0.000132555	0.000483436	4.91233e-05
20275	Poivron rouge, appertisé, égoutté		31.3	90.3	0.91	4.42	3.64	0.18	1.7	0.77	0.089	0.15	0.37	0	1530	1.65	440	12.5	19	156	25	0.12	0.63	0.098	0.15	10	10	0.0263703	5.57054	0.000766676	0.00372385	0.0030667	0.00015165	0.00143225	0.000648726	7.49826e-05	0.000126375	0.000311725	0	1.28903	0.00139013	0.3707	0.0105313	0.0160075	0.13143	0.0210625	0.0001011	0.000530776	8.25651e-05
20278	Céleri-rave, purée		26	91.4	1.37	2.83	2.11	0.18	4.01	0.18	0	0.013	0.067	0	209	0.43	54.5	12.2	33	218	50	0.15	0.5	0.079	0.22	10	10	0.0115656	5.6384	0.000609417	0.00125887	0.000938591	8.00694e-05	0.00178377	8.00694e-05	0	5.78279e-06	2.98036e-05	0	0.0929695	0.000191277	0.0242432	0.00542693	0.0146794	0.0969729	0.0222415	6.67245e-05	0.000222415	3.51416e-05
20279	Asperge, verte, crue		24.3	92.5	2.46	2.03	1.5	0.18	2.15	0.27	0.069	0.007	0.16	0	299	0.16	3.85	12.2	85.5	267	22.4	0.17	1	0.063	0.21	2.33	1.45	0.00267236	5.70626	0.000270535	0.000223246	0.00016496	1.97952e-05	0.000236443	2.96929e-05	7.58817e-06	7.69815e-07	1.75958e-05	0	0.0328821	1.75958e-05	0.000423398	0.00134168	0.00940274	0.0293629	0.00246341	1.86955e-05	0.000109974	6.92833e-06
20280	Chou romanesco ou brocoli à pomme, cru		35.8	91.5	3	2.03	1.6	0.18	4.3	0.8	0.27	0.18	0.26	0	81.1	0.74	2.5	13	55	260	32	0.19	0.53	0.05	0.32	10	10	0.0101343	5.64457	0.000849243	0.000574654	0.000452929	5.09546e-05	0.00121725	0.000226465	7.64318e-05	5.09546e-05	7.3601e-05	0	0.0229579	0.00020948	0.000707702	0.00368005	0.0155694	0.073601	0.00905859	5.37854e-05	0.000150033	1.4154e-05
20282	Asperge, blanche ou violette, pelée, crue		25.9	92.4	2.5	2.5	1.88	0.18	1.8	0.3	0.07	0.006	0.17	0	299	0.16	7.7	7.3	42.5	169	16.6	0.17	0.62	0.063	0.21	2.33	1.45	0.0212023	5.70009	0.00204656	0.00204656	0.00153901	0.000147352	0.00147352	0.000245587	5.73036e-05	4.91174e-06	0.000139166	0	0.244768	0.00013098	0.0063034	0.00597595	0.0347915	0.138347	0.0135891	0.000139166	0.000507547	5.15733e-05
20283	Salicorne (Salicornia sp.), fraîche		14	92.2	0.67	1.1	0.89	0.086	2.46	0.24	0.041	0.0083	0.095	0	299	0.51	1020	75.3	19.5	119	34.3	0.7	4.89	0.07	0.48	2.33	0	0.000601848	5.68775	2.88027e-05	4.72881e-05	3.82603e-05	3.69707e-06	0.000105753	1.03174e-05	1.76256e-06	3.5681e-07	4.08397e-06	0	0.0128538	2.19245e-05	0.0438489	0.00323708	0.000838288	0.00511571	0.00147453	3.00924e-05	0.000210217	3.00924e-06
20284	Petits pois, purée		85.6	78.9	4.8	8	3	0.18	4.8	2.8	1.7	0.17	0.93	0	209	0.43	17	12.2	33	218	29.2	0.15	0.45	0.079	0.22	10	10	0.296029	4.86728	0.0165997	0.0276662	0.0103748	0.00062249	0.0165997	0.00968318	0.00587908	0.000587908	0.0032162	0	0.72278	0.00148706	0.0587908	0.042191	0.114123	0.753905	0.100982	0.000518742	0.00155623	0.000273204
20285	Épinard, purée		59.4	86	3.7	5.2	1.2	0.18	2.2	2.2	1.2	0.16	0.82	0	209	0.43	289	12.2	33	218	29.2	0.15	0.45	0.079	0.22	10	10	0.0308553	5.30528	0.00192196	0.00270114	0.00062334	9.35009e-05	0.00114279	0.00114279	0.00062334	8.31119e-05	0.000425949	0	0.108565	0.000223363	0.150121	0.00633729	0.0171418	0.11324	0.0151679	7.79174e-05	0.000233752	4.10365e-05
20500	Fève, cuite		82.9	77.9	8.06	9.35	0.4	7.6	3.1	0.8	0.16	0.08	0.49	0	206	0.28	10	37	160	200	37	0.31	1.5	0.31	1	10	10	0.119755	4.80559	0.0116433	0.0135068	0.000577831	0.0109788	0.00447819	0.00115566	0.000231132	0.000115566	0.000707843	0	0.297583	0.000404482	0.0144458	0.0534494	0.231132	0.288915	0.0534494	0.000447819	0.00216687	0.000447819
20502	Haricot blanc, cuit		112	66.9	6.75	12	0.3	11.4	13.8	1.1	0.25	0.15	0.61	0	5.48	0.04	9.3	33	110	260	120	0.8	1.7	0.19	0.67	10	10	1.93951	4.12701	0.11689	0.207804	0.00519511	0.197414	0.238975	0.0190487	0.00432926	0.00259756	0.0105634	0	0.0948974	0.000692681	0.161048	0.571462	1.90487	4.50243	2.07804	0.0138536	0.029439	0.00329024
20503	Haricot rouge, cuit		116	65	9.63	12.3	0.5	11.5	11.6	0.6	0.19	0.16	0.24	0	2.5	0.04	8.4	39	150	300	55	0.44	2.3	0.27	0.94	10	10	0.323929	4.0098	0.0268917	0.0343476	0.00139625	0.0321136	0.0323929	0.00167549	0.000530573	0.000446798	0.000670198	0	0.00698123	0.0001117	0.0234569	0.108907	0.418874	0.837747	0.153587	0.0012287	0.00642273	0.000753972
20505	Lentille, cuite		123.828	65.1	10.6	15	0.26	14.7	8.2	0.5	0.09	0.13	0.28	0	12.5	0.11	2	25	110	190	21	0.39	2.2	0.29	1.3	5	3	3.49364	4.01597	0.299065	0.423205	0.00733555	0.414741	0.231352	0.0141068	0.00253923	0.00366778	0.00789982	0	0.352671	0.0031035	0.0564273	0.705341	3.1035	5.3606	0.592487	0.0110033	0.06207	0.00818196
20506	Pois cassé, cuit		129	64.9	8.6	16.3	3.85	11.4	7.95	1.49	0.16	0.33	0.66	0	10	0.19	4.5	20.9	134	327	24.7	0.28	2.09	0.19	0.65	1.1	2	0.430822	4.00363	0.0287215	0.0544372	0.0128579	0.0380727	0.0265507	0.00497617	0.000534353	0.0011021	0.00220421	0	0.0333971	0.000634545	0.0150287	0.0697999	0.447521	1.09208	0.0824908	0.000935118	0.00697999	0.000634545
20508	Haricot flageolet, appertisé, égouttés		92.9	72	6.1	12.2	0.2	12	6.3	0.79	0.11	0.016	0.14	0	25	0.37	293	26.5	86	281	63.1	0.05	1.3	0.05	0.05	1.1	5	1.23841	4.44163	0.0813162	0.162632	0.00266611	0.159966	0.0839824	0.0105311	0.00146636	0.000213289	0.00186627	0	0.333263	0.0049323	3.90585	0.353259	1.14643	3.74588	0.841157	0.000666527	0.0173297	0.000666527
20510	Lentille, cuisinée, appertisée, égouttée		85.7	73.5	6.28	11.8	0.42	10.2	4	0.64	0.11	0.15	0.26	0	25	0.19	230	15.8	82.7	178	21	0.4	1.67	0.12	0.55	2.8	3	0.892579	4.53416	0.0654072	0.122899	0.00437436	0.106235	0.0416606	0.0066657	0.00114567	0.00156227	0.00270794	0	0.260379	0.00197888	2.39549	0.164559	0.861333	1.8539	0.218718	0.00416606	0.0173933	0.00124982
20511	Haricot blanc, appertisé, égoutté		87.1	70.1	6.57	10.9	0.52	10.2	7	0.4	0.11	0.026	0.13	0	0	0.79	270	51	91	454	73	0.52	2.99	0.23	1.12	10	3	0.495222	4.32442	0.0373548	0.0619738	0.00295655	0.0579938	0.0397997	0.00227427	0.000625423	0.000147827	0.000739137	0	0	0.00449168	1.53513	0.289969	0.517396	2.58129	0.415054	0.00295655	0.0170001	0.0013077
20513	Haricot flageolet, cuit		112	66.9	6.75	12	0.3	11.4	13.8	1.1	0.25	0.15	0.61	0	5.48	0.04	9.3	33	110	260	120	0.8	1.7	0.19	0.67	10	10	0.388931	4.12701	0.02344	0.0416712	0.00104178	0.0395876	0.0479218	0.00381986	0.000868149	0.00052089	0.00211828	0	0.0190298	0.000138904	0.0322952	0.114596	0.381986	0.902875	0.416712	0.00277808	0.00590342	0.000659794
20524	Haricot rouge, appertisé, égoutté		108	68.9	8.31	13	1	11.4	7	0.97	0.41	0.052	0.35	0	0	0.19	269	29	118	250	58	0.38	1.5	0.28	0.74	10	5	0.120465	4.25039	0.00926915	0.0145005	0.00111542	0.0127158	0.00780795	0.00108196	0.000457323	5.80019e-05	0.000390397	0	0	0.00021193	0.300048	0.0323472	0.13162	0.278855	0.0646944	0.00042386	0.00167313	0.000312318
20531	Haricot mungo, cuit		95.2	72.5	7.54	11.9	2.01	9.68	6.4	0.55	0.038	0.029	0.36	0	19	0.15	7	63	156	231	53	0.41	1.75	0.14	0.83	10	5	0.0756894	4.47247	0.00599472	0.00946117	0.00159806	0.00769614	0.00508836	0.000437281	3.02121e-05	2.30566e-05	0.00028622	0	0.0151061	0.000119258	0.00556539	0.0500885	0.124029	0.183658	0.042138	0.000325973	0.00139135	0.000111308
20532	Pois chiche, appertisé, égoutté		122	72.1	6.74	15	0.5	11.4	5.45	2.68	0.3	0.47	0.92	0	11.5	0.29	216	27.5	82.5	135	41.2	0.67	1.15	0.21	0.93	23.3	5	0.985789	4.44779	0.0544608	0.121204	0.00404012	0.0921147	0.0440373	0.021655	0.00242407	0.00379771	0.00743382	0	0.0929227	0.00234327	1.74533	0.222207	0.66662	1.09083	0.332906	0.00541376	0.00929227	0.00169685
20900	Farine de soja		446	5.13	35.8	22.9	7.5	14.5	10	21.4	3.04	4.98	12.1	0	72	11.5	7.5	335	527	2230	178	2.29	5.19	2.26	4.46	11	0.5	0.32136	0.316466	0.0257953	0.0165003	0.00540404	0.0104478	0.00720539	0.0154195	0.00219044	0.00358828	0.00871852	0	0.0518788	0.00828619	0.00540404	0.24138	0.379724	1.6068	0.128256	0.00165003	0.0037396	0.00162842
20901	Soja, graine entière		95.2	72.5	7.54	11.9	2.01	9.68	6.4	0.55	0.038	0.029	0.36	0	19	0.15	7	63	156	231	53	0.41	1.75	0.14	0.83	10	5	0.284314	4.47247	0.0225181	0.0355392	0.00600285	0.0289092	0.0191135	0.00164257	0.000113487	8.66082e-05	0.00107514	0	0.0567433	0.000447974	0.0209054	0.188149	0.465893	0.689879	0.158284	0.00122446	0.00522636	0.000418109
20904	Tofu, nature		143	73.8	13.4	2.87	0.57	0.18	0.25	8.5	1.35	1.91	4.81	0	2.5	0.71	10	100	210	140	100	0.93	2.4	0.24	1.3	10	10	0.161692	4.55267	0.0151515	0.00324514	0.000644506	0.000203528	0.000282678	0.00961105	0.00152646	0.00215966	0.00543873	0	0.00282678	0.000802806	0.0113071	0.113071	0.23745	0.1583	0.113071	0.00105156	0.00271371	0.000271371
20987	Nori (Porphyra sp.), séchée ou déshydratée		255	6.54	31.5	10.5	2.97	0	36.3	1.63	0.33	0.15	0.54	0	0	2.87	1980	486	518	1730	318	3.94	37.2	1.06	4.52	51.2	5100	0.000615487	0.403448	7.60308e-05	2.53436e-05	7.16862e-06	0	8.76165e-05	3.93429e-06	7.96513e-07	3.62051e-07	1.30339e-06	0	0	6.92725e-06	0.00477908	0.00117305	0.00125028	0.00417566	0.000767549	9.50988e-06	8.97888e-05	2.5585e-06
21501	Agneau, côtelette, grillée		157	67.7	26.3	0	0	0	0	5.78	2.21	2.05	0.54	3	0	0.16	59	23	200	330	11.4	0.013	1.27	0.09	3.55	10.1	5	0.05273	4.17636	0.00883312	0	0	0	0	0.00194127	0.000742251	0.000688513	0.000181364	0.00100758	0	5.37376e-05	0.0198157	0.00772478	0.067172	0.110834	0.00382881	4.36618e-06	0.000426542	3.02274e-05
21503	Agneau, gigot, rôti/cuit au four		169	65.9	26.8	0	0	0	0	6.85	2.63	2.54	0.63	0	0	0.13	75.5	30.7	183	301	21.8	0.015	1.4	0.12	4.01	10.3	5	0.145459	4.06532	0.0230669	0	0	0	0	0.00589583	0.00226365	0.00218619	0.000542244	0	0	0.000111892	0.0649832	0.0264236	0.157509	0.259072	0.0187634	1.29106e-05	0.00120499	0.000103285
21506	Agneau, épaule, rôtie/cuite au four		252	53.7	30.5	0.05	0	0	0	14.5	5.26	4.69	1.26	7.5	0	0.14	95.5	25.4	231	376	8.8	0.05	2.2	0.2	4.7	2.5	8.6	1.13614	3.31271	0.137508	0.000225424	0	0	0	0.0653729	0.0237146	0.0211447	0.00568068	0.0338135	0	0.000631186	0.430559	0.114515	1.04146	1.69519	0.0396746	0.000225424	0.00991864	0.000901695
21507	Agneau, épaule, maigre, rôtie/cuite au four		197	63.3	24.9	0	0	0	0	10.8	4.08	4.36	0.95	0	0	0.18	68	25	200	265	19	0.026	2.13	0.11	6.04	6	5	1.68299	3.90493	0.212724	0	0	0	0	0.0922657	0.0348559	0.037248	0.00811596	0	0	0.00153776	0.580932	0.213578	1.70862	2.26393	0.162319	0.000222121	0.0181968	0.000939743
21508	Agneau, collier, braisé ou bouilli		365	40.6	33.6	0	0	0	0	25.6	9.53	9.76	2.19	3	0	0.36	59	23	200	330	11.4	0.013	0.66	0.09	7.14	13.9	5	0.244751	2.50458	0.0225305	0	0	0	0	0.0171661	0.00639034	0.00654457	0.0014685	0.00201165	0	0.000241398	0.0395624	0.0154226	0.13411	0.221281	0.00764427	8.71715e-06	0.000442563	6.03495e-05
21509	Agneau, côte filet, grillée/poêlée		157	67.7	26.3	0	0	0	0	5.78	2.21	2.05	0.54	3	0	0.16	59	23	200	330	11.4	0.013	1.27	0.09	3.55	10.1	5	1.59414	4.17636	0.267044	0	0	0	0	0.0586888	0.0224398	0.0208152	0.00548304	0.0304613	0	0.0016246	0.599073	0.233537	2.03075	3.35075	0.115753	0.000131999	0.0128953	0.00091384
21513	Agneau, selle, partie maigre, rôtie/cuite au four		153	68.3	26.1	0	0	0	0	5.45	2.01	1.92	0.53	0	0	0.11	64	23	180	246	18	0.02	1.21	0.12	3.67	10.3	5	0.120394	4.21338	0.0205378	0	0	0	0	0.00428855	0.00158165	0.00151083	0.000417052	0	0	8.65579e-05	0.0503609	0.0180985	0.14164	0.193575	0.014164	1.57378e-05	0.000952137	9.44268e-05
21518	Agneau, gigot, grillé/poêlé		169	65.9	26.8	0	0	0	0	6.85	2.63	2.54	0.63	0	0	0.13	75.5	30.7	183	301	21.8	0.015	1.4	0.12	4.01	10.3	5	1.3823	4.06532	0.219206	0	0	0	0	0.0560283	0.0215116	0.0207755	0.00515297	0	0	0.00106331	0.617538	0.251105	1.49681	2.46197	0.178309	0.00012269	0.011451	0.000981518
21519	Agneau, gigot, braisé		222	55.2	35.2	0	0	0	0	9.03	3.46	3.34	0.83	3	0	0.29	59	23	200	330	11.4	0.013	0.97	0.09	5.28	13.6	5	0.251394	3.40525	0.0398607	0	0	0	0	0.0102256	0.00391812	0.00378223	0.000939896	0.00339722	0	0.000328398	0.0668119	0.0260453	0.226481	0.373694	0.0129094	1.47213e-05	0.00109843	0.000101916
21520	Agneau, selle, partie maigre, grillée/poêlée		153	68.3	26.1	0	0	0	0	5.45	2.01	1.92	0.53	0	0	0.11	64	23	180	246	18	0.02	1.21	0.12	3.67	10.3	5	0.134382	4.21338	0.022924	0	0	0	0	0.00478682	0.00176542	0.00168637	0.000465507	0	0	9.66148e-05	0.0562122	0.0202013	0.158097	0.216066	0.0158097	1.75663e-05	0.00106276	0.000105398
22000	Oeuf, cru		140	76.3	12.7	0.27	0.27	0	0	9.83	2.64	3.66	1.65	182	0	1.43	124	11	204	134	76.8	0.027	1.88	0.055	1.01	1.29	21	3.47638	4.70689	0.315357	0.00670444	0.00670444	0	0	0.244091	0.0655546	0.0908825	0.0409716	4.51929	0	0.0355087	3.07908	0.273144	5.06558	3.32739	1.90704	0.000670444	0.0466828	0.00136572
22001	Oeuf, blanc (blanc d'oeuf), cru		48.1	87.6	10.8	0.85	0.71	0	0	0.19	0	0.078	0	0	0	0	166	11	15	163	6	0.011	0.05	0.023	0.03	6	1.9	0.0339675	5.40398	0.0076268	0.000600257	0.000501391	0	0	0.000134175	0	5.50824e-05	0	0	0	0	0.117227	0.00776803	0.0105928	0.115108	0.00423711	7.76803e-06	3.53092e-05	1.62423e-05
22002	Oeuf, jaune (jaune d'oeuf), cru		307	55	15.5	1.09	0.56	0	0	26.7	8.47	11.9	4.07	336	88	3.89	19.1	1.5	141	43	50.2	0.05	0.7	0.05	1.1	83.5	175	5.15225	3.39291	0.26013	0.018293	0.00939824	0	0	0.448095	0.142148	0.199713	0.0683051	5.63895	1.47687	0.0652842	0.320547	0.0251739	2.36634	0.721651	0.842485	0.000839129	0.0117478	0.000839129
22003	Oeuf, jaune (jaune d'oeuf), en poudre		340	50.3	16	1.31	0.55	0	0	30.1	8.49	12.1	4.45	263	106	5	14	4.5	121	58.6	76.4	0.05	0.95	0.15	1.4	76.4	192	0.130678	3.10297	0.00614953	0.000503493	0.00021139	0	0	0.0115688	0.0032631	0.00465058	0.00171034	0.101083	0.0407407	0.00192173	0.00538084	0.00172956	0.0465058	0.0225227	0.029364	1.92173e-05	0.000365129	5.76519e-05
22004	Oeuf, blanc (blanc d'oeuf), en poudre		47.3	87.8	10.3	1.12	0.7	0	0	0.17	0	0	0	0	0	0	155	9.67	14.7	147	6.67	0.011	0.067	0.023	0.025	6.1	52	0.0238215	5.41632	0.00518735	0.000564061	0.000352538	0	0	8.56164e-05	0	0	0	0	0	0	0.078062	0.00487006	0.0074033	0.074033	0.00335918	5.53988e-06	3.37429e-05	1.15834e-05
22008	Oeuf, blanc (blanc d'oeuf), cuit		47.3	87.8	10.3	1.12	0.7	0	0	0.17	0	0	0	0	0	0	155	9.67	14.7	147	6.67	0.011	0.067	0.023	0.025	6.1	52	0.041621	5.41632	0.00906335	0.000985529	0.000615956	0	0	0.000149589	0	0	0	0	0	0	0.13639	0.00850899	0.0129351	0.129351	0.00586918	9.67931e-06	5.89558e-05	2.02385e-05
22009	Oeuf, jaune (jaune d'oeuf), cuit		340	50.3	16	1.31	0.55	0	0	30.1	8.49	12.1	4.45	263	106	5	14	4.5	121	58.6	76.4	0.05	0.95	0.15	1.4	76.4	192	0.921563	3.10297	0.0433676	0.00355073	0.00149076	0	0	0.0815854	0.023012	0.0327968	0.0120616	0.712856	0.287311	0.0135524	0.0379467	0.0121972	0.327968	0.158834	0.207081	0.000135524	0.00257495	0.000406572
22010	Oeuf, dur		134	76.5	13.5	0.52	0.52	0	0	8.62	2.55	3.57	1.03	61.5	11	1.03	123	14	172	120	41	0.031	1.72	0.068	1.27	7.01	49.7	16.9957	4.71923	1.71225	0.0659535	0.0659535	0	0	1.09331	0.323426	0.452796	0.130639	7.80027	1.39517	0.130639	15.6005	1.77567	21.8154	15.22	5.20018	0.00393184	0.218154	0.00862469
22011	Oeuf, poché		138	75.9	12.5	0.71	0.37	0	0	9.47	2.99	4.04	1.49	159	0	1.04	79.3	10.8	197	138	68.2	0.03	1.75	0.069	1.1	7.68	52	0.105592	4.68221	0.00956449	0.000543263	0.000283109	0	0	0.00724606	0.00228783	0.00309124	0.00114009	0.12166	0	0.000795766	0.0606771	0.00826372	0.150736	0.105592	0.0521839	2.29548e-05	0.00133903	5.2796e-05
22013	Oeuf, en poudre		134	76.5	13.5	0.52	0.52	0	0	8.62	2.55	3.57	1.03	61.5	11	1.03	123	14	172	120	41	0.031	1.72	0.068	1.27	7.01	49.7	0.362646	4.71923	0.0365352	0.00140728	0.00140728	0	0	0.0233284	0.00690109	0.00966153	0.0027875	0.166438	0.0297694	0.0027875	0.332876	0.0378884	0.465485	0.324757	0.110959	8.38956e-05	0.00465485	0.000184029
22014	Oeuf, à la coque		142	76	12.2	1.08	0.77	0	0	9.82	2.95	4.75	1.14	132	11	2.17	150	11.7	155	164	150	0.05	1.9	0.05	0.93	23.8	50.4	0.696592	4.68838	0.0598481	0.00529803	0.0037773	0	0	0.0481728	0.0144715	0.0233015	0.00559236	0.647536	0.0539614	0.0106451	0.735837	0.0573953	0.760365	0.804515	0.735837	0.000245279	0.0093206	0.000245279
22050	Oeuf de caille, cru		154	74.4	13.1	0.41	0.4	0	0	11.1	3.56	4.32	1.32	155	11	1.08	141	13	226	132	64	0.038	3.65	0.062	1.47	6	21	0.0514549	4.58968	0.00437701	0.00013699	0.000133649	0	0	0.00370876	0.00118948	0.00144341	0.000441042	0.0517891	0.00367535	0.000360853	0.0471113	0.0043436	0.0755118	0.0441042	0.0213839	1.26967e-05	0.00121955	2.07156e-05
22070	Oeuf d'oie, cru		180	70.4	13.8	1.4	0.94	0	0	13.3	3.6	5.75	1.67	185	13	1.29	138	16	208	210	60	0.038	3.64	0.062	1.33	6	21	0.00167043	4.34292	0.000128067	1.29923e-05	8.72337e-06	0	0	0.000123426	3.34087e-05	5.33611e-05	1.54979e-05	0.00171683	0.000120642	1.19714e-05	0.00128067	0.000148483	0.00193028	0.00194884	0.000556811	3.52647e-07	3.37799e-05	5.75371e-07
22505	Oeuf, au plat, sans matière grasse		147	74.6	13.8	1.01	0.63	0	0	9.72	2.71	3.43	1.3	115	11	1.04	159	10.9	160	135	67.1	0.031	2.6	0.064	1.07	15.1	54.5	5.77483	4.60202	0.542127	0.0396774	0.0247493	0	0	0.381846	0.106461	0.134746	0.0510699	4.51772	0.43213	0.0408559	6.24624	0.428201	6.28552	5.30341	2.63599	0.00121782	0.10214	0.00251421
25004	Choucroute, sans garniture, égouttée		75.3	85.6	1.38	0.05	0.1	0.18	4.5	6.6	2.02	3.12	1.08	10.5	2.5	0.4	505	6.8	15	83	43	0.09	0.3	0.05	0.15	10	10	0.53563	5.2806	0.00981632	0.000355664	0.000711328	0.00128039	0.0320097	0.0469476	0.0143688	0.0221934	0.00768234	0.0746894	0.0177832	0.00284531	3.5922	0.0483703	0.106699	0.590402	0.305871	0.000640195	0.00213398	0.000355664
25201	Langue de bœuf sauce madère		180	70.4	9.5	4.5	2.5	1.3	1	13.5	6	4.93	2.17	10.5	76.5	0.62	430	19.5	151	241	16.9	0.11	1.16	0.061	1.5	7.69	8	0.0742771	4.34292	0.00392018	0.00185693	0.00103163	0.000536446	0.000412651	0.00557078	0.0024759	0.00203437	0.000895452	0.00433283	0.0315678	0.000255843	0.17744	0.00804669	0.0623102	0.0994488	0.00697379	4.53916e-05	0.000478675	2.51717e-05
25214	Tournedos de bœuf façon Rossini		250	58.8	16.9	4.68	1.07	2.5	0.23	18.1	7.11	9.14	0.51	1570	0.18	0.26	206	24.3	178	283	14.5	0.071	3.22	0.34	3.84	14.6	5.8	0.0298456	3.62733	0.00201756	0.00055871	0.000127739	0.000298456	2.7458e-05	0.00216082	0.00084881	0.00109116	6.08851e-05	0.187431	2.14889e-05	3.10395e-05	0.0245928	0.002901	0.0212501	0.0337853	0.00173105	8.47616e-06	0.000384412	4.05901e-05
25215	Magret de canard façon Rossini		297	55.3	22.3	0.56	0.41	0.046	0.084	22.8	7.39	8.63	2.25	1310	11.4	0.45	436	26	243	329	5.16	0.064	4.64	0.6	1.88	28.8	14.3	0.0580484	3.41142	0.00435852	0.000109452	8.01342e-05	8.99067e-06	1.64177e-05	0.00445624	0.00144437	0.00168673	0.000439761	0.256039	0.00222812	8.79522e-05	0.0852159	0.00508168	0.0474942	0.0643028	0.00100852	1.25088e-05	0.000906885	0.00011727
25538	Carpaccio de bœuf, avec marinade		271	57	15.2	0.55	0.5	0.0024	0.36	23	7.38	10	4	23.6	98.3	3.18	437	22.6	187	242	112	0.064	1.84	0.1	2.79	5.84	9.12	0.311493	3.51629	0.0174712	0.000632182	0.000574711	2.75861e-06	0.000413792	0.0264367	0.00848274	0.0114942	0.00459769	0.0271264	0.112988	0.00365516	0.502298	0.0259769	0.214942	0.27816	0.128735	7.3563e-05	0.00211494	0.000114942
25604	Salade verte, crue, sans assaisonnement		13.1	96.1	1.01	1.5	0.83	0.25	1.3	0.1	0.028	0.0035	0.037	0	2000	0.17	18.3	15.3	23.5	260	35.3	0.22	0.64	0.061	0.18	3.23	2.5	1.12045	5.92834	0.086386	0.128296	0.0709905	0.0213827	0.11119	0.00855307	0.00239486	0.000299358	0.00316464	0	171.061	0.0145402	1.56521	1.30862	2.00997	22.238	3.01923	0.0188168	0.0547397	0.00521737
25918	Bouillon de viande et légumes type pot-au-feu, déshydraté		213	4.53	10.3	17.7	2.87	0	0.67	11.1	5.85	1.64	2.39	0	0	2.17	21600	21.9	127	511	32.7	0.1	0.35	0.12	0.32	4.6	2.5	0.0265675	0.279452	0.00128472	0.00220772	0.000357975	0	8.35691e-05	0.0013845	0.00072967	0.000204557	0.000298105	0	0	0.000270664	2.69417	0.00273159	0.0158407	0.063737	0.00407867	1.2473e-05	4.36555e-05	1.49676e-05
25998	Hareng fumé, filet, doux		162	67.7	18.1	0	0	0	0.25	9.9	2.24	5.51	1.59	10.5	0	1.72	1510	39	250	380	62	0.03	0.7	0.08	0.51	30	10	0.371429	4.17636	0.0414992	0	0	0	0.000573193	0.0226984	0.00513581	0.0126332	0.00364551	0.0240741	0	0.00394357	3.46209	0.0894181	0.573193	0.871254	0.142152	6.87832e-05	0.00160494	0.000183422
25999	Anchois, filets roulés aux câpres, semi-conserve, égoutté		198	46	24.8	1.48	0	0	0.5	10.3	0.86	2.09	4.49	8.5	0	1.5	373	32.3	214	313	65.5	0.05	1.2	0.061	1.01	37.4	30	0.00170544	2.83771	0.000213611	1.27477e-05	0	0	4.30667e-06	8.87174e-05	7.40748e-06	1.80019e-05	3.86739e-05	7.32134e-05	0	1.292e-05	0.00321278	0.000278211	0.00184326	0.00269598	0.000564174	4.30667e-07	1.0336e-05	5.25414e-07
26000	Anchois, filets à l'huile, semi-conserve, égoutté		182	55.1	26.4	0.1	0	0	0.13	8.45	3.08	3.55	1.4	5	0	1.16	4210	43.7	231	355	189	0.1	3.22	0.25	2.92	8	30	0.110744	3.39908	0.016064	6.08483e-05	0	0	7.91028e-05	0.00514168	0.00187413	0.00216012	0.000851877	0.00304242	0	0.000705841	2.56172	0.0265907	0.14056	0.216012	0.115003	6.08483e-05	0.00195932	0.000152121
26003	Carrelet ou plie, cuit à la vapeur		93	78	19	0	0	0	0	1.89	0.22	0.44	0.66	10.5	0	0.68	83.2	29.2	225	370	21	0.04	0.45	0.05	0.68	30.4	30	0.0441541	4.81176	0.00902074	0	0	0	0	0.000897326	0.000104451	0.000208901	0.000313352	0.00498514	0	0.000322847	0.0395013	0.0138635	0.106825	0.175667	0.00997029	1.8991e-05	0.000213649	2.37388e-05
26004	Oeufs de lompe, semi-conserve		111	76	10.4	1	0	0	0	7.27	1.97	1.42	3.52	13	0	1.89	1950	3	83	68.4	11.6	0.05	0.4	0.05	0.8	8	60	0.0274568	4.68838	0.00257252	0.000247358	0	0	0	0.00179829	0.000487296	0.000351249	0.000870701	0.00321566	0	0.000467507	0.482348	0.000742074	0.0205307	0.0169193	0.00286935	1.23679e-05	9.89433e-05	1.23679e-05
26005	Caviar, semi-conserve		254	58.7	25	0	0	0	0	17.1	3.21	4.88	7.33	14	0	1.6	665	16.3	107	127	14.6	0.07	0.5	0.04	0.8	8	117	0.0838029	3.62116	0.00824832	0	0	0	0	0.00564185	0.00105908	0.00161007	0.00241841	0.00461906	0	0.000527892	0.219405	0.0053779	0.0353028	0.0419014	0.00481702	2.30953e-05	0.000164966	1.31973e-05
26008	Églefin, cuit à la vapeur		89	78.3	20.9	0	0	0	0	0.6	0.1	0.1	0.21	0	0	0.41	73	24	200	370	26	0.01	0.1	0.02	0.5	34.3	260	0.0677692	4.83027	0.0159143	0	0	0	0	0.000456871	7.61452e-05	7.61452e-05	0.000159905	0	0	0.000312195	0.055586	0.0182748	0.15229	0.281737	0.0197978	7.61452e-06	7.61452e-05	1.5229e-05
26011	Hareng, cru		176	71.5	17.7	0	0	0	0	11.7	2.82	5.59	2.43	38.1	0	1.21	89.2	27	235	342	61.6	0.027	1.21	0.15	0.79	31.2	54.1	0.0226258	4.41078	0.00227543	0	0	0	0	0.0015041	0.000362527	0.000718625	0.00031239	0.00489797	0	0.000155552	0.0114672	0.003471	0.0302105	0.043966	0.00791902	3.471e-06	0.000155552	1.92833e-05
26013	Hareng fumé, au naturel		173	68.3	16.5	0.5	0	0	0	11.7	2.76	1.6	5.13	12	0	1.35	1590	34.8	155	226	62.4	0.05	1	0.05	0.6	28	40	0.12886	4.21338	0.0122901	0.000372427	0	0	0	0.00871478	0.00205579	0.00119177	0.0038211	0.00893824	0	0.00100555	1.18432	0.0259209	0.115452	0.168337	0.0464788	3.72427e-05	0.000744853	3.72427e-05
26014	Hareng, grillé/poêlé		189	64.2	21.6	0	0	0	0	11.4	2.48	5.25	2.28	35	0	1.37	138	41.5	307	425	76.5	0.045	1.51	0.15	1.24	46	47.7	0.310069	3.96045	0.0354365	0	0	0	0	0.0187026	0.00406863	0.00861304	0.00374052	0.0574202	0	0.00224759	0.2264	0.068084	0.503658	0.697246	0.125504	7.3826e-05	0.00247727	0.000246087
26015	Lieu noir, cuit		99.7	75.5	23.1	0	0	0.5	0	0.81	0.29	0.042	0.23	8	15	1.7	102	36	152	224	37.5	0.011	0.4	0.064	0.63	23.8	12	0.656975	4.65754	0.152218	0	0	0.00329476	0	0.00533751	0.00191096	0.00027676	0.00151559	0.0527162	0.0988428	0.0112022	0.672131	0.237223	1.00161	1.47605	0.247107	7.24847e-05	0.00263581	0.000421729
26017	Limande-sole, cuite à la vapeur		90.1	76.9	17.4	0	0	0	0	2.27	0.12	0.2	0.31	0	0	0.3	120	20	250	280	21	0	0.6	0.01	0.5	73	45.5	0.330159	4.7439	0.06376	0	0	0	0	0.00831811	0.000439724	0.000732873	0.00113595	0	0	0.00109931	0.439724	0.0732873	0.916092	1.02602	0.0769517	0	0.00219862	3.66437e-05
26019	Maquereau, rôti/cuit au four		228	61.5	21.5	0	0	0	0	15.8	4.44	5.45	4.15	62	0	0.71	83	28.5	207	401	12.8	0.05	1.57	0.05	0.94	51.6	45.8	0.890398	3.79389	0.083963	0	0	0	0	0.061703	0.0173393	0.0212836	0.0162068	0.242126	0	0.00277273	0.324136	0.1113	0.808388	1.56601	0.0499873	0.000195263	0.00613125	0.000195263
26020	Maquereau, frit		189	65.7	21.6	0	0	0	0	11.4	2.73	4.37	3.11	76.2	0	0.97	485	30.5	261	225	128	0.04	1.57	0.13	1.31	31.9	21.9	0.180309	4.05298	0.0206067	0	0	0	0	0.0108758	0.00260446	0.00416905	0.00296699	0.072696	0	0.000925395	0.462697	0.0290975	0.248998	0.214653	0.122114	3.81606e-05	0.0014978	0.000124022
26021	Merlan, frit		125	71.4	23.1	0	0	0	0	3.61	0.94	1.67	0.75	10.5	0	1.25	171	34.1	165	402	26.5	0.014	0.5	0.024	0.47	25.2	213	0.366624	4.40461	0.0677521	0	0	0	0	0.0105881	0.00275701	0.0048981	0.00219974	0.0307964	0	0.00366624	0.501542	0.100015	0.483944	1.17906	0.0777243	4.10619e-05	0.0014665	7.03918e-05
26022	Merlan, cuit à la vapeur		98.3	75.2	23	0	0	0	0	0.7	0.13	0.3	0.2	0	0	0.44	110	28	190	400	21	0.01	0.1	0.01	0.4	25	75	0.429652	4.63903	0.100529	0	0	0	0	0.00305958	0.000568207	0.00131125	0.000874164	0	0	0.00192316	0.48079	0.122383	0.830456	1.74833	0.0917873	4.37082e-05	0.000437082	4.37082e-05
26023	Cabillaud, rôti/cuit au four		94.6	76	22.3	0	0	0	0	0.6	0.13	0.093	0.19	8	0	0.7	90.5	29.4	164	297	18.4	0.016	0.3	0.017	0.5	22.4	130	2.37987	4.68838	0.561006	0	0	0	0	0.0150943	0.00327044	0.00233962	0.00477987	0.201258	0	0.01761	2.27673	0.739622	4.12578	7.47169	0.462893	0.000402515	0.00754716	0.000427673
26024	Morue, salée, bouillie/cuite à l'eau		113	67.4	26	0	0	0	0	1.01	0.13	0.061	0.22	1	0	0.55	2320	13.7	42	110	64.9	0.019	0.35	0.089	0.84	20.7	74	0.883967	4.15786	0.203391	0	0	0	0	0.00790095	0.00101695	0.000477186	0.001721	0.00782272	0	0.0043025	18.1487	0.107171	0.328554	0.860499	0.507694	0.000148632	0.00273795	0.000696222
26025	Cabillaud, cuit à la vapeur		106	73.4	24.5	0	0	0	0	0.95	0.16	0.085	0.33	2	0	0.48	65	21	240	360	10	0.01	0.1	0.02	0.5	29.1	110	1.98512	4.52799	0.458825	0	0	0	0	0.0177912	0.00299641	0.00159184	0.00618009	0.0374551	0	0.00898922	1.21729	0.393278	4.49461	6.74192	0.187275	0.000187275	0.00187275	0.000374551
26031	Raie, rôtie/cuite au four		96.3	75.9	23	0	0	0	0	0.5	0.096	0.096	0.19	0	0	0	150	37	220	320	50	0	0.6	0.03	0.6	28	22.5	0.206841	4.68221	0.0494014	0	0	0	0	0.00107394	0.000206197	0.000206197	0.000408098	0	0	0	0.322183	0.0794718	0.472535	0.687323	0.107394	0	0.00128873	6.44366e-05
26033	Roussette ou petite roussette ou saumonette, cuite		256	56.4	25.4	0	0	0	0	17.2	4.11	6.98	4.36	5	0	0.68	83.2	29.2	225	370	21	0.05	0.45	0.05	0.67	42	24.8	0.0490023	3.47927	0.00486195	0	0	0	0	0.00329234	0.000786717	0.00133608	0.000834571	0.000957077	0	0.000130162	0.0159258	0.00558933	0.0430685	0.0708237	0.00401972	9.57077e-06	8.61369e-05	9.57077e-06
26034	Sardine, à l'huile, appertisée, égouttée		207	60.5	24.4	0.49	0	0	0	12	2.56	4.33	3.41	4.7	0	1.44	300	38.5	306	368	333	0.05	1.97	0.062	1.89	35	80.1	0.192935	3.7322	0.0227421	0.000456706	0	0	0	0.0111846	0.00238606	0.00403579	0.0031783	0.00438065	0	0.00134216	0.279616	0.0358841	0.285208	0.342996	0.310374	4.66027e-05	0.00183615	5.77873e-05
26035	Sardine, sauce tomate, appertisée, égouttée		193	64.9	20.2	1.38	0.7	0	1.05	11.6	3.04	3.65	4.24	4	0	2.3	280	32.5	352	376	378	0.24	2.6	0.24	1.8	37.7	45.1	0.209631	4.00363	0.0219406	0.00149891	0.000760319	0	0.00114048	0.0125996	0.00330196	0.00396452	0.00460536	0.00434468	0	0.00249819	0.304128	0.0353005	0.382332	0.4084	0.410572	0.000260681	0.00282404	0.000260681
26036	Saumon, cru, élevage		194	66.5	20.5	0	0	0	0.13	12.4	2.15	4.9	4.17	4.27	0.004	1.89	45.4	27.4	181	358	5.84	0.05	0.48	0.05	0.36	16.5	8.21	0.491576	4.10233	0.0519449	0	0	0	0.000329407	0.0314203	0.00544788	0.0124161	0.0105663	0.0108197	1.01356e-05	0.00478906	0.115039	0.0694288	0.458635	0.907135	0.014798	0.000126695	0.00121627	0.000126695
26037	Saumon fumé		178	63.1	22	0.91	0	0	0.13	9.49	2.06	4	3.09	15	4	2.85	1410	38.3	214	551	5.97	0.0098	0.16	0.035	0.24	5	40	2.52123	3.89259	0.311612	0.0128894	0	0	0.00184134	0.134418	0.0291782	0.0566568	0.0437673	0.212463	0.0566568	0.0403679	19.9715	0.542488	3.03114	7.80447	0.0845602	0.000138809	0.00226627	0.000495747
26038	Saumon, cuit à la vapeur		195	63.5	23	0	0	0	0	11.5	2.39	4.7	3.3	5	0	2.05	51.5	21.4	270	390	9.23	0.007	0.4	0.026	0.39	19	17	1.28512	3.91727	0.151578	0	0	0	0	0.0757889	0.0157509	0.0309746	0.0217481	0.0329517	0	0.0135102	0.339403	0.141033	1.77939	2.57023	0.0608288	4.61324e-05	0.00263614	0.000171349
26039	Thon, au naturel, appertisé, égoutté		111	72.7	26.8	0	0	0	0	0.4	0.086	0.078	0.12	6.5	0	1.2	251	24	155	207	6.26	0.0037	0.76	0.031	0.45	305	16	2.3712	4.48481	0.572506	0	0	0	0	0.00854486	0.00183714	0.00166625	0.00256346	0.138854	0	0.0256346	5.3619	0.512692	3.31113	4.42196	0.133727	7.904e-05	0.0162352	0.000662227
26041	Thon, rôti/cuit au four		136	66.9	29.9	0	0	0	0	1.83	0.9	0.23	0.52	8	0	0.32	56	46	273	445	18.7	0.0076	1.8	0.047	0.44	81.2	150	0.37446	4.12701	0.0823261	0	0	0	0	0.00503869	0.00247804	0.000633277	0.00143176	0.022027	0	0.000881082	0.154189	0.126655	0.751673	1.22525	0.0514882	2.09257e-05	0.00495608	0.000129409
26053	Thon, cru		144	66.6	24	0	0	0	0	5.38	1.19	1.16	1.61	265	0	1.2	49	34.9	229	429	17.7	0.023	1.77	0.13	0.55	97.1	26.9	0.005892	4.1085	0.000982	0	0	0	0	0.000220132	4.86908e-05	4.74633e-05	6.58758e-05	0.0108429	0	4.91e-05	0.00200492	0.00142799	0.00936991	0.0175532	0.000724225	9.41083e-07	7.24225e-05	5.31916e-06
26056	Oeufs de cabillaud, fumés, semi-conserve		146	67	26.9	0.1	0.1	0	0	4.2	0.56	0.65	1.31	8.7	0	4.33	290	12.8	453	280	8.2	0.13	1.11	0.082	4.3	11.5	230	0.0011343	4.13318	0.000208992	7.76921e-07	7.76921e-07	0	0	3.26307e-05	4.35076e-06	5.04998e-06	1.01777e-05	6.75921e-05	0	3.36407e-05	0.00225307	9.94458e-05	0.00351945	0.00217538	6.37075e-05	1.01e-06	8.62382e-06	6.37075e-07
26060	Sole, rôtie/cuite au four		78.2	82.4	15.7	0	0	0	0	1.69	0.31	0.43	0.31	12	0	0.77	117	31.3	285	224	47.7	0.035	0.57	0.027	0.58	17.4	30	0.0700662	5.08319	0.014067	0	0	0	0	0.00151422	0.000277756	0.000385275	0.000277756	0.0107518	0	0.00068991	0.104831	0.0280444	0.255356	0.200701	0.0427386	3.13596e-05	0.000510713	2.41917e-05
26062	Sole, frite		72.2	83	15.8	0	0	0	0	1	0.2	0.6	0.2	10.5	0	0.68	144	28	250	240	21	0.022	0.86	0.047	0.57	42.3	27.4	0.171	5.12021	0.0374211	0	0	0	0	0.00236842	0.000473685	0.00142105	0.000473685	0.0248685	0	0.00161053	0.341053	0.0663159	0.592106	0.568422	0.0497369	5.21053e-05	0.00203685	0.000111316
26065	Sardine, crue		163	64	19.5	0	0	0	0	9.48	2.4	1.2	3.25	28	0	0.28	101	36	286	584	57.5	0.33	1.67	0.41	1.5	52.8	26.8	0.0127495	3.94811	0.00152524	0	0	0	0	0.000741503	0.000187722	9.38612e-05	0.000254207	0.00219009	0	2.19009e-05	0.00789998	0.00281584	0.0223702	0.0456791	0.00449752	2.58118e-05	0.000130623	3.20692e-05
26069	Thon rouge, cru		155	68.1	23.3	0	0	0	0	6.81	1.26	1.6	1.43	655	0	1	39	50	254	252	8	0.015	1.02	0.086	0.6	73.4	26.8	0.0886783	4.20104	0.0133303	0	0	0	0	0.00389612	0.000720869	0.000915389	0.000818129	0.374737	0	0.000572118	0.0223126	0.0286059	0.145318	0.144174	0.00457694	8.58177e-06	0.00058356	4.92021e-05
26071	Thon à l'huile, appertisé, égoutté		206	62.1	23.3	0.76	0	0	0	12.2	1.34	3.7	6.58	10.5	0	7.65	373	32	180	220	12	0.005	0.77	0.06	0.65	90	10	0.222659	3.8309	0.0251843	0.000821461	0	0	0	0.0131866	0.00144837	0.00399922	0.00711212	0.0113491	0	0.00826866	0.403164	0.0345878	0.194557	0.237791	0.0129704	5.40435e-06	0.00083227	6.48522e-05
26072	Bar commun ou loup, cru, sans précision		82.5	78.1	19.1	0	0	0	0	0.7	0.2	0.21	0.19	10.5	0	0.79	92.3	27	207	390	10	0.005	0.26	0.04	0.3	30	21.9	0.00286831	4.81793	0.000664056	0	0	0	0	2.43371e-05	6.95347e-06	7.30114e-06	6.6058e-06	0.000365057	0	2.74662e-05	0.00320903	0.000938718	0.00719684	0.0135593	0.000347673	1.73837e-07	9.03951e-06	1.39069e-06
26073	Raie, cuite au court-bouillon		97.8	73.7	23.2	0	0	0	0	0.57	0.12	0.048	0.16	0	0	0	161	24.3	163	370	21	0	0.45	0.03	0.6	28	8.9	0.00533564	4.5465	0.00126571	0	0	0	0	3.10973e-05	6.5468e-06	2.61872e-06	8.72907e-06	0	0	0	0.00878362	0.00132573	0.00889274	0.020186	0.00114569	0	2.45505e-05	1.6367e-06
26076	Thon germon ou thon blanc, cru		121	69.5	27.2	0	0	0	0	1.37	0.26	0.22	0.27	3.02	0	0.44	77.7	37.6	242	355	3.5	0.05	0.95	0.05	0.38	188	14	0.0282735	4.2874	0.00635569	0	0	0	0	0.000320121	6.07529e-05	5.14063e-05	6.30896e-05	0.000705669	0	0.000102813	0.0181558	0.00878581	0.056547	0.0829511	0.000817828	1.16833e-05	0.000221982	1.16833e-05
26077	Thon germon ou thon blanc, cuit à la vapeur sous pression		165	64	30	0	0	0	0	5.06	1.35	1.07	2.18	4	0	1.5	41.1	34.3	307	390	1.33	0.02	1.01	0.22	0.54	37.4	40	0.753596	3.94811	0.137018	0	0	0	0	0.0231103	0.00616579	0.00488696	0.00995661	0.018269	0	0.00685088	0.187714	0.156657	1.40215	1.78123	0.00607444	9.1345e-05	0.00461292	0.0010048
26079	Anchois commun, cru		129	71.8	18.6	0	0	0	0	6.07	1.64	1.11	1.69	65.7	0	0.57	73	22.3	162	294	86.5	0.23	2.63	0.38	1.86	21.3	55	0.0598128	4.42929	0.00862417	0	0	0	0	0.00281445	0.000760411	0.000514669	0.000783594	0.0304628	0	0.000264289	0.0338476	0.0103397	0.0751138	0.136318	0.040107	0.000106643	0.00121944	0.000176193
26081	Lotte ou baudroie, grillée/poêlée		98.2	75	23	0	0	0	0	0.68	0.19	0.1	0.2	50	0	0.6	24.5	28.5	368	472	11	0.05	0.46	0.3	0.64	42.5	40.6	0.186734	4.62669	0.0437362	0	0	0	0	0.00129307	0.000361299	0.000190157	0.000380315	0.0950786	0	0.00114094	0.0465885	0.0541948	0.699779	0.897542	0.0209173	9.50786e-05	0.000874724	0.000570472
26085	Rouget-barbet de roche, cru		143	69.6	24.1	0	0	0	0	5.2	0.73	3.95	0.29	23.1	0	2.1	95.6	33	230	410	21	0.02	0.48	0.05	0.39	50	40	0.116571	4.29357	0.0196459	0	0	0	0	0.00423895	0.000595083	0.00321997	0.000236403	0.0188307	0	0.00171188	0.0779314	0.026901	0.187492	0.334225	0.0171188	1.63036e-05	0.000391288	4.07591e-05
26086	Maquereau, filet sauce tomate, appertisé, égoutté		227	61.9	17.7	1.94	0.94	1	1.02	16.3	2.92	6.35	4.51	48.4	0	0.9	257	25	135	326	20	0.06	1.1	0.05	1	37.4	63.8	0.0796579	3.81856	0.00621121	0.000680777	0.000329861	0.000350916	0.000357934	0.00571993	0.00102467	0.00222832	0.00158263	0.0169843	0	0.000315824	0.0901854	0.0087729	0.0473736	0.114399	0.00701832	2.1055e-05	0.000386008	1.75458e-05
26087	Maquereau, fumé		294	55.7	18.8	0	0	0	0	24.3	5.35	9.59	6.83	53.5	0	1.6	384	29	267	312	20	0.02	1.1	0.09	0.1	31.9	46.5	0.0752433	3.43609	0.00481148	0	0	0	0	0.00621909	0.00136922	0.00245436	0.001748	0.0136922	0	0.000409487	0.0982769	0.00742196	0.0683332	0.07985	0.00511859	5.11859e-06	0.000281523	2.30337e-05
26088	Dorade royale ou daurade ou vraie daurade, crue, élevage		148	68.8	23.6	0	0	0	0	5.9	1.3	2.4	1.79	10.5	0	0.65	71	29	230	420	13	0.005	0.2	0.02	0.48	10	10	0.468292	4.24422	0.0746736	0	0	0	0	0.0186684	0.00411338	0.00759393	0.00566381	0.0332234	0	0.00205669	0.224654	0.09176	0.727752	1.32894	0.0411338	1.58207e-05	0.000632827	6.32827e-05
26090	Haddock (fumé) ou églefin fumé		97	76.8	22.6	0	0	0	0	0.73	0.13	0.098	0.22	24	0	0.55	763	54	251	415	49	0.03	1.4	0.042	0.5	28	255	0.0243452	4.73773	0.00567218	0	0	0	0	0.000183216	3.26276e-05	2.45962e-05	5.52159e-05	0.00602355	0	0.00013804	0.191499	0.013553	0.0629963	0.104157	0.0122981	7.52944e-06	0.000351374	1.05412e-05
26092	Truite de mer, crue		111	74.5	19.6	0	0	0	0	3.63	0.62	1.06	1.3	12	0	0.65	55	29.3	270	458	12.7	0.027	1.23	0.04	0.95	22.9	20	0.00472924	4.59585	0.000835073	0	0	0	0	0.000154659	2.64156e-05	4.51621e-05	5.53875e-05	0.000511269	0	2.76937e-05	0.00234332	0.00124835	0.0115036	0.0195134	0.000541093	1.15036e-06	5.24051e-05	1.70423e-06
26093	Espadon, rôti/cuit au four		266	52.9	28.7	0	0	0	0	16.9	1.51	8.22	2.67	43	0	7.2	73.4	34.1	200	475	5.5	0.021	0.53	0.046	0.78	122	9.3	0.22421	3.26336	0.024191	0	0	0	0	0.0142449	0.00127277	0.00692859	0.00225053	0.0362444	0	0.00606883	0.0618684	0.0287427	0.168579	0.400374	0.00463591	1.77008e-05	0.000446734	3.87731e-05
26094	Turbot, rôti/cuit au four		118	72.7	21.3	0	0	0	0	3.64	0.9	0.8	0.7	12	0	0	192	63.5	213	323	42.5	0.022	0.53	0.049	0.29	28	30	0.0191054	4.48481	0.00344868	0	0	0	0	0.000589353	0.000145719	0.000129528	0.000113337	0.00194292	0	0	0.0310867	0.0102813	0.0344868	0.0522969	0.00688118	3.56202e-06	8.58123e-05	7.93359e-06
26096	Maquereau, filet sauce moutarde, appertisé, égoutté		217	61.7	20.8	1.09	0.8	0	0.58	14.2	3.92	2.5	7.09	38	0	1.63	405	26.7	127	180	22.9	0.05	1.3	0.05	0.4	2.5	20	0.12641	3.80623	0.0121167	0.000634963	0.000466028	0	0.00033787	0.008272	0.00228354	0.00145634	0.00413017	0.0221363	0	0.000949532	0.235927	0.0155537	0.073982	0.104856	0.0133401	2.91268e-05	0.000757296	2.91268e-05
26097	Maquereau, filet au vin blanc, appertisé, égoutté		207	64.4	17.8	2.25	0.5	0	0	14.1	2.92	5.91	4.88	19	0	0.88	387	17	123	165	184	0.05	0.84	0.05	1.02	28.8	14.4	0.407636	3.97279	0.0350527	0.00443082	0.000984627	0	0	0.0277665	0.00575022	0.0116383	0.00960996	0.0374158	0	0.00173294	0.762102	0.0334773	0.242218	0.324927	0.362343	9.84627e-05	0.00165417	9.84627e-05
26098	Morue, salée, sèche		113	67.4	26	0	0	0	0	1.01	0.13	0.061	0.22	1	0	0.55	2320	13.7	42	110	64.9	0.019	0.35	0.089	0.84	20.7	74	0.00976533	4.15786	0.00224689	0	0	0	0	8.7283e-05	1.12344e-05	5.27155e-06	1.90121e-05	8.64188e-05	0	4.75304e-05	0.200492	0.00118394	0.00362959	0.00950607	0.00560858	1.64196e-06	3.02466e-05	7.69128e-06
26099	Dorade grise, ou daurade grise, ou griset, crue		130	72.9	20.5	0	0	0	0.5	5.27	1.41	1.78	1.37	1.5	0	0.69	60.6	31.2	250	400	100	0.05	0.39	0.05	0.8	20.2	30.9	0.00108061	4.49715	0.000170404	0	0	0	4.15619e-06	4.38062e-05	1.17204e-05	1.4796e-05	1.1388e-05	1.24686e-05	0	5.73554e-06	0.00050373	0.000259346	0.00207809	0.00332495	0.000831237	4.15619e-07	3.24183e-06	4.15619e-07
26106	Grondin, cru		171	66.5	26.1	0	0	0	0	7.4	1.8	2.3	1.9	14	1	0.64	78	27.5	178	368	83	0.05	0.5	0.05	0.49	30	26.8	0.0699023	4.10233	0.0106693	0	0	0	0	0.00302501	0.000735814	0.000940206	0.000776692	0.00572299	0.000408785	0.000261623	0.0318853	0.0112416	0.0727638	0.150433	0.0339292	2.04393e-05	0.000204393	2.04393e-05
26119	Saumon, appertisé, égoutté		180	68.5	20.5	1.5	0	0	0	10.2	1.68	3.27	2	90	0	1.5	488	42	440	300	270	0.048	0.45	0.038	0.7	42	30	0.00532117	4.22571	0.000606022	4.43431e-05	0	0	0	0.000301533	4.96643e-05	9.6668e-05	5.91241e-05	0.00266059	0	4.43431e-05	0.0144263	0.00124161	0.0130073	0.00886862	0.00798176	1.41898e-06	1.33029e-05	1.12336e-06
26120	Merlu, cuit à l'étouffée		112	74.4	21.2	0	0	0	0	3	0.92	0.92	0.59	7.5	0	0.6	99.2	29.2	190	290	41.8	0.05	0.3	0.05	0.55	22	42	0.811414	4.58968	0.153589	0	0	0	0	0.0217343	0.00666519	0.00666519	0.00427441	0.0543358	0	0.00434686	0.718681	0.211547	1.37651	2.10098	0.302831	0.000362239	0.00217343	0.000362239
26123	Maquereau, au naturel, appertisé, égoutté		189	65.7	21.6	0	0	0	0	11.4	2.73	4.37	3.11	76.2	0	0.97	485	30.5	261	225	128	0.04	1.57	0.13	1.31	31.9	21.9	0.157106	4.05298	0.017955	0	0	0	0	0.00947622	0.00226931	0.00363255	0.00258518	0.0633411	0	0.00080631	0.403155	0.0253531	0.216956	0.187031	0.1064	3.32499e-05	0.00130506	0.000108062
26126	Églefin, grillé/poêlé		89	78.3	20.9	0	0	0	0	0.6	0.1	0.1	0.21	0	0	0.41	73	24	200	370	26	0.01	0.1	0.02	0.5	34.3	260	0.0337453	4.83027	0.00792445	0	0	0	0	0.000227496	3.79161e-05	3.79161e-05	7.96237e-05	0	0	0.000155456	0.0276787	0.00909985	0.0758321	0.140289	0.00985817	3.79161e-06	3.79161e-05	7.58321e-06
26129	Lieu jaune ou colin, cru		92	76.8	20.9	0	0	0	0	0.9	0.17	0.13	0.32	0	0	0.48	80	20	202	328	36	0.01	1	0.31	2.1	17	110	3.18901	4.73773	0.724459	0	0	0	0	0.0311968	0.00589273	0.00450621	0.0110922	0	0	0.0166383	2.77305	0.693262	7.00195	11.3695	1.24787	0.000346631	0.0346631	0.0107456
26136	Sardine, grillée		194	64	25.1	0	0	0	0	10.4	2.9	2.94	3.52	0	0	0.31	140	34	320	400	130	0.08	1.7	0.14	1.4	38	32	0.531553	3.94811	0.068773	0	0	0	0	0.0284956	0.00794589	0.00805549	0.00964466	0	0	0.000849388	0.383595	0.0931587	0.876788	1.09598	0.356195	0.000219197	0.00465793	0.000383595
26141	Foie de morue, cru		619	26.8	5	0	0	0	0	66.6	14	31	17	5100	0	20	589	8	100	130	10	0.05	4	0.66	1.94	63.5	500	0.0386284	1.65327	0.000312022	0	0	0	0	0.00415614	0.000873662	0.00193454	0.00106088	0.318263	0	0.00124809	0.0367562	0.000499236	0.00624045	0.00811258	0.000624045	3.12022e-06	0.000249618	4.11869e-05
26142	Foie de morue, appertisé, égoutté		433	45.7	7.25	1.1	0	0	0	44.4	6.87	21.9	10.4	4170	0	4.96	446	10.3	145	130	10	0.05	2.1	0.4	2	107	105	0.184763	2.8192	0.00309361	0.000469375	0	0	0	0.0189457	0.00293146	0.00934484	0.00443773	1.77936	0	0.00211646	0.19031	0.00439506	0.0618722	0.0554716	0.00426705	2.13352e-05	0.00089608	0.000170682
26148	Rascasse, cuite à la vapeur		126	71.7	24.6	0	0	0	0	3.1	0.61	0.83	0.73	10.5	0	0.68	88.8	33	200	380	14	0.01	0.18	0.02	0.37	80	10	0.0538748	4.42312	0.0105184	0	0	0	0	0.00132549	0.000260823	0.00035489	0.000312132	0.00448957	0	0.000290753	0.0379689	0.0141101	0.0855156	0.16248	0.00598609	4.27578e-06	7.6964e-05	8.55156e-06
26153	Sabre, cru		125	74.8	18	0	0	0	0	5.9	0.94	1.36	1.83	15	0	0.64	110	27.5	150	270	12	0.05	0.6	0.05	0.49	30	26.8	0.0539654	4.61436	0.00777102	0	0	0	0	0.00254717	0.00040582	0.000587144	0.000790054	0.00647585	0	0.000276303	0.0474896	0.0118724	0.0647585	0.116565	0.00518068	2.15862e-05	0.000259034	2.15862e-05
26162	Requin, cru		116.635	74.6	27.7	0	0	0	0	0.5	0.11	0.07	0.15	0	0	0.36	162	30	187	310	9	1.932	0.14	0.038	0.3	34.2	23.3	0.00358954	4.60202	0.000852492	0	0	0	0	1.53879e-05	3.38535e-06	2.15431e-06	4.61638e-06	0	0	1.10793e-05	0.00498569	0.000923277	0.00575509	0.00954053	0.000276983	5.9459e-05	4.30862e-06	1.16948e-06
26166	Orphie commune, crue		133	70.1	20	0	0	0	0	5.91	1.81	1.77	1.74	7	0	1.7	83.5	27.5	196	377	73	0.02	0.73	0.2	0.77	30.9	20	0.0246353	4.32442	0.00370455	0	0	0	0	0.0010947	0.000335262	0.000327853	0.000322296	0.00129659	0	0.000314887	0.0154665	0.00509376	0.0363046	0.0698308	0.0135216	3.70455e-06	0.000135216	3.70455e-05
26173	Sprat, cru		186	66.7	19.8	0	0	0	0	11.9	3.32	5.44	3.16	150	0	2.5	77.8	20	220	230	18.8	0.13	0.59	0.13	1.02	10	26.8	0.0221675	4.11467	0.00235977	0	0	0	0	0.00141824	0.000395678	0.000648341	0.00037661	0.017877	0	0.000297951	0.00927222	0.0023836	0.0262197	0.0274115	0.00224059	1.54934e-05	7.03163e-05	1.54934e-05
26177	Anchois au sel (anchoité, semi-conserve)		128	61.6	25	0	0	0	0	3.1	0.82	0.76	1.05	55	0	0.29	3600	32.3	481	215	542	0.05	6.9	0.061	1.7	37.4	30	0.00541048	3.80006	0.00105673	0	0	0	0	0.000131035	3.46609e-05	3.21247e-05	4.43828e-05	0.00232482	0	1.22581e-05	0.15217	0.0013653	0.0203316	0.00908792	0.02291	2.11347e-06	0.000291659	2.57843e-06
26179	Thon germon ou thon blanc, à l'huile d'olive, appertisé, égoutté		192	59.3	31.3	1.01	0	0	0	6.95	1.41	3.9	1.3	4	0	1.75	270	35.9	196	331	1	0.05	0.5	0.05	0.4	11	6	0.450407	3.65817	0.0734258	0.00236933	0	0	0	0.0163038	0.00330768	0.0091489	0.00304963	0.00938348	0	0.00410527	0.633385	0.0842168	0.459791	0.776483	0.00234587	0.000117294	0.00117294	0.000117294
26211	Saumon, cuit au micro-ondes, élevage		200	63	24.2	0	0	0	0	11.4	2.37	3.49	2.69	15	0	2.4	39	31.6	250	402	5	0.05	0.4	0.05	0.4	2.5	27.4	0.738894	3.88642	0.0894061	0	0	0	0	0.0421169	0.00875589	0.0128937	0.00993812	0.055417	0	0.00886672	0.144084	0.116745	0.923617	1.48518	0.0184723	0.000184723	0.00147779	0.000184723
26217	Saumon, bouilli/cuit à l'eau, élevage		193	63.4	25	0	0	0	0	10.3	2.14	3.16	2.43	14	0	2.63	33.6	29.7	150	347	4.6	0.05	0.3	0.05	0.4	2.5	27.4	0.846438	3.9111	0.109642	0	0	0	0	0.0451726	0.00938537	0.0138588	0.0106572	0.0613996	0	0.0115344	0.147359	0.130255	0.657853	1.52183	0.0201742	0.000219284	0.00131571	0.000219284
26222	Dorade grise, ou daurade grise, ou griset, rôtie/cuite au four		121	71	22.9	0	0	0	0	3.3	0.75	0.78	0.78	10.5	0	0.68	83.2	29.2	225	370	21	0.022	0.45	0.047	0.57	50	27.4	0.275854	4.37994	0.0522072	0	0	0	0	0.0075233	0.00170984	0.00177824	0.00177824	0.0239378	0	0.00155026	0.189678	0.0665698	0.512952	0.843522	0.0478756	5.01554e-05	0.0010259	0.00010715
26229	Saumon, grillé/poêlé		223	60.1	25.5	0	0	0	0	13.5	2.87	6.18	4.16	17.5	0	3.52	44.2	31.7	263	414	8.4	0.05	0.43	0.05	0.48	11	13.5	0.239275	3.70752	0.027361	0	0	0	0	0.0144852	0.00307946	0.00663102	0.0044636	0.0187772	0	0.00377689	0.0474258	0.0340135	0.282194	0.444214	0.00901304	5.36491e-05	0.000461382	5.36491e-05
26230	Saumon, élevage, rôti/cuit au four		210	62.2	22.1	0	0	0	0	13.5	2.5	4.43	4.43	10.5	0	0.68	61	30	252	384	15	0.016	0.34	0.049	0.43	28	27.4	3.17685	3.83707	0.334326	0	0	0	0	0.204226	0.0378197	0.0670165	0.0670165	0.158843	0	0.010287	0.9228	0.453836	3.81222	5.8091	0.226918	0.000242046	0.00514348	0.000741266
26231	Sardine, filets sans arêtes à l'huile d'olive, appertisés, égouttés		213	61.4	21.5	0.62	0	0	0	13.9	3.16	4.9	3.1	2.5	0	2.1	282	37	262	357	108	0.05	2.3	0.1	2	46	40	0.167977	3.78772	0.0169554	0.000488947	0	0	0	0.0109619	0.00249205	0.00386426	0.00244474	0.00197156	0	0.00165611	0.222392	0.0291791	0.20662	0.281539	0.0851714	3.94312e-05	0.00181384	7.88624e-05
26234	Julienne ou Lingue, cuite		105	73.9	24.5	0	0	0	0	0.82	8.8e-05	8.8e-05	8.8e-05	10.5	0	0.68	84.3	31	180	330	13	0.005	0.14	0.02	0.62	60	49	0.1352	4.55884	0.0315466	0	0	0	0	0.00105584	1.1331e-07	1.1331e-07	1.1331e-07	0.01352	0	0.000875579	0.108546	0.0399161	0.231771	0.424913	0.016739	6.43808e-06	0.000180266	2.57523e-05
26243	Thon, à la catalane ou à l'escabèche (sauce tomate), appertisé		142	73.9	10.8	5.05	2.93	0	0.75	8.6	0.67	5	2.5	8.5	0	1.5	402	32.3	214	313	65.5	0.05	1.2	0.061	1.01	37.4	30	0.298023	4.55884	0.0226665	0.0105987	0.00614934	0	0.00157406	0.0180493	0.00140616	0.0104938	0.00524688	0.0178394	0	0.00314813	0.843698	0.0677897	0.449133	0.656909	0.137468	0.000104938	0.0025185	0.000128024
26247	Flétan du Groënland ou flétan noir ou flétan commun, cuit à la vapeur		173	68.8	17.3	0	0	0	0	11.6	2.07	7.38	0.98	10.5	0	0.68	143	21	160	240	8.6	0.005	0.07	0.02	0.36	60	10	0.225401	4.24422	0.0225401	0	0	0	0	0.0151136	0.002697	0.00961538	0.00127684	0.0136804	0	0.00088597	0.186314	0.0273608	0.208464	0.312695	0.0112049	6.51449e-06	9.12028e-05	2.60579e-05
26275	Oeufs de saumon, semi-conserve		224	49	30.8	1.5	0.1	0	0	10.5	2.05	3.4	4.51	393	0	7.52	936	8.1	2.6	94	5.6	0.09	0.08	0.005	0.025	10	330	0.020077	3.02277	0.00276059	0.000134444	8.96294e-06	0	0	0.000941109	0.00018374	0.00030474	0.000404229	0.0352244	0	0.000674013	0.0838931	0.000725998	0.000233036	0.00842516	0.000501925	8.06665e-06	7.17035e-06	4.48147e-07
26999	Anguille, cuite (aliment moyen)		213	60.7	22.1	0	0	0	0	13.8	3.15	7.8	1.51	575	0	2.89	74.1	27.6	251	360	23.5	0.04	0.54	0.029	2.08	28	8	0.0640733	3.74454	0.00664798	0	0	0	0	0.00415123	0.000947563	0.00234635	0.000454229	0.172968	0	0.000869352	0.0222903	0.00830246	0.0755043	0.108293	0.00706912	1.20326e-05	0.000162439	8.7236e-06
27004	Carpe, rôtie/cuite au four		151	69.6	21.6	0	0	0	0	7.17	1.27	2.74	1.69	10	0	0.68	63	38	531	427	52	0.23	1.59	0.12	1.58	20.2	6	0.614293	4.29357	0.0878723	0	0	0	0	0.0291687	0.00516657	0.0111468	0.0068752	0.0406816	0	0.00276635	0.256294	0.15459	2.16019	1.73711	0.211544	0.000935677	0.00646838	0.00048818
27005	Perche, rôtie/cuite au four		119	73.7	22.1	0	0	0	0	3.42	0.85	0.2	0.26	24	0	1.32	38.3	26	105	331	73	0.28	0.71	0.058	0.77	26	2.5	0.0899477	4.5465	0.0167046	0	0	0	0	0.00258505	0.000642484	0.000151173	0.000196524	0.0181407	0	0.000997739	0.0289496	0.0196524	0.0793656	0.250191	0.055178	0.000211642	0.000536663	4.38401e-05
27006	Truite, rôtie/cuite au four		183	63.4	26.6	0	0	0	0	8.47	1.47	4.17	1.92	19	0	0.68	67	28	314	463	55	0.56	1.92	0.14	0.71	3	6	0.290608	3.9111	0.0422414	0	0	0	0	0.0134506	0.0023344	0.00662206	0.00304901	0.0301725	0	0.00107986	0.106398	0.0444647	0.49864	0.735255	0.0873413	0.000889294	0.00304901	0.000222323
27007	Truite, cuite à la vapeur		99.4	75	19	0	0	0	0	2.6	0.54	0.74	1.06	10.5	0	0.68	83.2	29.2	225	370	21	0.027	0.45	0.03	0.56	3	6	0.18854	4.62669	0.0360388	0	0	0	0	0.00493162	0.00102426	0.00140362	0.00201059	0.0199162	0	0.00128981	0.157812	0.0553859	0.426775	0.701808	0.0398324	5.1213e-05	0.00085355	5.69034e-05
27014	Truite arc en ciel, élevage, rôtie/cuite au four		143	71	21.5	0	0	0	0	6.33	1.51	2.15	1.94	9.5	0	1.9	53.3	28.3	263	391	60.5	0.027	0.35	0.03	0.59	2.85	9.5	0.0625092	4.37994	0.00939824	0	0	0	0	0.00276702	0.000660062	0.000939824	0.000848027	0.00415271	0	0.000830542	0.0232989	0.0123707	0.114965	0.170917	0.0264462	1.18024e-05	0.000152995	1.31138e-05
27015	Truite arc en ciel, élevage, cuite à la vapeur		117	75	20	0	0	0	0	4.14	0.86	1.4	1.46	10.5	0	0.68	83.2	29.2	225	370	21	0.027	0.45	0.03	0.56	3	8	0.0876383	4.62669	0.0149809	0	0	0	0	0.00310105	0.000644179	0.00104866	0.00109361	0.00786498	0	0.000509351	0.0623206	0.0218721	0.168535	0.277147	0.01573	2.02242e-05	0.000337071	2.24714e-05
27017	Pangasius ou Poisson-chat, cru		65.2	83.8	13.5	0	0	0	0	1.27	0.47	0.44	0.17	1	0	0.16	274	17.6	107	200	36.7	0.05	0.21	0.05	0.24	9.6	7.95	0.0165005	5.16956	0.00341652	0	0	0	0	0.000321406	0.000118946	0.000111353	4.30228e-05	0.000253076	0	4.04921e-05	0.0693427	0.00445413	0.0270791	0.0506151	0.00928787	1.26538e-05	5.31459e-05	1.26538e-05
27019	Tilapia, cru		120.83	72.06	25.37	0	0		0	2.15	0.739	0.629	0.459	0	0	0.5	163	34	215	382	13	0.037	0.71	0.095	0.42	52.8	6.88214	0.00966203	4.44533	0.00202868	0	0	0	0	0.000171922	5.90932e-05	5.02972e-05	3.67034e-05	0	0	3.99819e-05	0.0130341	0.00271877	0.0171922	0.0305462	0.00103953	2.95866e-06	5.67743e-05	7.59656e-06
27021	Truite saumonée, crue		143	74.2	19.2	0	0	0	0	7.4	1.2	2.08	2.03	20	0	0.64	92.8	30.5	210	346	46.7	0	0.52	0.043	0.61	14.8	8.89	0.066489	4.57734	0.00892719	0	0	0	0	0.00344069	0.000557949	0.000967112	0.000943864	0.00929916	0	0.000297573	0.0431481	0.0141812	0.0976411	0.160875	0.0217135	0	0.000241778	1.99932e-05
27024	Sandre, cru		82.9	78.4	18.3	0	0	0	0	1.08	0.21	0.24	0.31	0	0	1.35	57	29	220	340	54	0.03	0.3	0.014	0.4	20	21.5	0.0203397	4.83644	0.00448995	0	0	0	0	0.000264981	5.1524e-05	5.88846e-05	7.60592e-05	0	0	0.000331226	0.0139851	0.00711522	0.0539775	0.0834198	0.013249	7.36057e-06	7.36057e-05	3.43493e-06
27029	Truite d'élevage, fumée		180	61.7	23.4	0.69	0	0	0	9.27	1.71	3.01	2.36	51	0	2.3	1270	31.4	227	412	2.7	0.05	0.4	0.05	0.4	23	40	0.196643	3.80623	0.0255636	0.000753799	0	0	0	0.0101271	0.00186811	0.00328831	0.00257821	0.0557156	0	0.00251266	1.38743	0.0343033	0.247989	0.450094	0.00294965	5.46231e-05	0.000436985	5.46231e-05
27030	Bar commun ou loup, rôti/cuit au four		147	69.1	22.2	0	0	0	0	6.51	1.27	2.36	2.14	10.5	0	0.97	68.8	30.3	183	410	11	0.01	0.28	0.05	0.42	25	13.4	0.543978	4.26273	0.0821518	0	0	0	0	0.0240905	0.00469968	0.00873326	0.00791914	0.0388556	0	0.00358952	0.254597	0.112126	0.677197	1.51722	0.0407059	3.70053e-05	0.00103615	0.000185027
28001	Porc, épaule, crue		253	54.7	30	0	0	0	0	14.8	5.56	7.12	1.46	2	0	0.25	46.4	20	195	318	18	0.026	1.58	0.12	4.23	16	5	0.0601335	3.3744	0.00713046	0	0	0	0	0.00351769	0.00132151	0.0016923	0.000347016	0.000475364	0	5.94205e-05	0.0110284	0.00475364	0.046348	0.0755828	0.00427827	6.17973e-06	0.000375537	2.85218e-05
28002	Porc, poitrine, crue		253	59.8	17	0	0	0	0	20.5	7.89	9.65	2	0	0	0.1	56.1	18.8	382	293	6.68	0.012	0.52	0.1	1.84	20	0.97	0.0133511	3.68902	0.000897109	0	0	0	0	0.00108181	0.000416364	0.000509241	0.000105542	0	0	5.27711e-06	0.00296046	0.000992097	0.0201586	0.0154619	0.000352511	6.33254e-07	2.7441e-05	5.27711e-06
28004	Porc, jarret, cru		205	59.3	29.1	0.24	0	0	0	9.78	3.52	4.01	0.98	4.57	0	0.12	47.1	28.5	224	378	10.1	0.013	0.87	0.068	2.38	15.8	5.68	1.61226	3.65817	0.228863	0.00188753	0	0	0	0.0769168	0.0276837	0.0315374	0.00770741	0.0359417	0	0.000943764	0.370427	0.224144	1.76169	2.97286	0.0794335	0.000102241	0.00684229	0.0005348
28007	Porc, longe, cuite		240	57.5	27.1	0	0	0	0	14.7	5.37	6.51	1.21	3	0	0.19	59	26	242	408	19	0.011	0.99	0.056	2.32	10.3	5	0.889462	3.54713	0.100435	0	0	0	0	0.0544795	0.0199017	0.0241266	0.00448437	0.0111183	0	0.000704157	0.218659	0.0963584	0.896874	1.51208	0.0704157	4.0767e-05	0.00366903	0.000207541
28010	Porc, épaule, cuite		253	54.7	30	0	0	0	0	14.8	5.56	7.12	1.46	2	0	0.25	46.4	20	195	318	18	0.026	1.58	0.12	4.23	16	5	1.5649	3.3744	0.185561	0	0	0	0	0.0915434	0.0343906	0.0440398	0.00903064	0.0123707	0	0.00154634	0.287001	0.123707	1.20615	1.96695	0.111337	0.00016082	0.00977288	0.000742244
28101	Porc, côte, grillée		211	58.9	29.6	0	0	0	0	10.3	4.11	4.31	1.37	10.5	0	0.04	57	29	260	470	7.3	0.005	0.7	0.06	2.4	20	10	9.32239	3.6335	1.30779	0	0	0	0	0.455074	0.181588	0.190424	0.0605293	0.463911	0	0.00176728	2.51837	1.28128	11.4873	20.7655	0.322528	0.00022091	0.0309274	0.00265092
28103	Porc, rouelle de jambon, cuite		266	48.6	36.9	0	0	0	0	13.1	4.88	5	1.12	3	0	0.29	72	23	244	444	11.4	0.013	1.7	0.09	3.46	21	5	0.233799	2.9981	0.0324331	0	0	0	0	0.0115142	0.00428925	0.00439472	0.000984418	0.00263683	0	0.000254894	0.063284	0.0202157	0.214463	0.390252	0.01002	1.14263e-05	0.00149421	7.9105e-05
28105	Porc, carré, cuit		206	57.5	34.1	0.6	0	0	0	7.45	3.03	3.52	0.67	3	0	0.29	38.8	23	226	402	11.4	0.013	0.89	0.09	2.11	12.4	5	0.222634	3.54713	0.0368535	0.000648448	0	0	0	0.00805157	0.00327466	0.00380423	0.000724101	0.00324224	0	0.000313417	0.041933	0.0248572	0.244249	0.43446	0.0123205	1.40497e-05	0.000961865	9.72672e-05
28202	Porc, filet, maigre, en rôti, cuit		198	59.7	28.3	0	0	0	0	9.39	3.5	3.58	0.8	1	0	0.08	61	32.5	281	436	5.5	0.013	1.29	0.09	2.69	10.3	2.5	1.01859	3.68285	0.145586	0	0	0	0	0.0483057	0.0180053	0.0184169	0.0041155	0.00514437	0	0.00041155	0.313807	0.167192	1.44557	2.24295	0.028294	6.68768e-05	0.00663624	0.000462994
28203	Porc, filet mignon, cuit		168	65.4	26.1	0	0	0	0	7.1	2.58	2.41	0.73	3	0	0.29	50.4	24.6	219	344	7.27	0.013	1.1	0.09	1.98	10.1	5	0.952916	4.03448	0.148042	0	0	0	0	0.040272	0.0146341	0.0136698	0.00414065	0.0170164	0	0.00164491	0.285875	0.139534	1.24219	1.95121	0.0412363	7.37375e-05	0.00623933	0.000510491
28301	Porc, rôti, cuit		163	63.8	30.5	0.65	0	0	0	4.31	1.32	1.6	0.31	1	0	0.11	32.3	32.6	204	330	6.97	0.0095	0.64	0.054	1.74	14	3.1	5.21301	3.93577	0.97544	0.0207881	0	0	0	0.137841	0.0422158	0.0511706	0.00991431	0.0319816	0	0.00351798	1.03301	1.0426	6.52426	10.5539	0.222912	0.000303826	0.0204683	0.00172701
28401	Porc, travers, braisé		333	49.4	23.1	0.13	0	0	0	26.6	10.7	12.1	2.55	4	0	0.34	48.8	18	149	226	30.4	0.05	1.2	0.11	3	2.5	2.5	2.58326	3.04745	0.179199	0.00100848	0	0	0	0.206351	0.0830057	0.0938663	0.0197817	0.0310302	0	0.00263757	0.378568	0.139636	1.15587	1.75321	0.235829	0.000387877	0.00930906	0.00085333
28451	Porc, échine, rôtie/cuite au four		295	51.5	26.2	0.05	0	0	0	21.2	7.89	5.74	1.81	2	0	0.2	58	28	213	425	18	0.016	1.09	0.059	4.2	39.1	5	1.77911	3.177	0.158009	0.000301544	0	0	0	0.127855	0.0475837	0.0346173	0.0109159	0.0120618	0	0.00120618	0.349791	0.168865	1.28458	2.56313	0.108556	9.64941e-05	0.00657366	0.000355822
28502	Poitrine de porc, fumée, crue		303	53.9	15.6	0.79	0.75	0.04	1	26.1	9.39	12.1	3.16	7	0	0.41	956	13.8	149	209	20.2	0.05	1.1	0.08	1.5	10	12	0.00597868	3.32505	0.000307813	1.5588e-05	1.47987e-05	7.89264e-07	1.97316e-05	0.000514995	0.00018528	0.000238753	6.23519e-05	0.000138121	0	8.08996e-06	0.0188634	0.000272296	0.00294001	0.00412391	0.000398579	9.86581e-07	2.17048e-05	1.57853e-06
28504	Lardon nature, cuit		324	48.2	23.8	2	0.75	0	0	24.5	12.6	8.12	2.6	1	2	0.24	1650	22	156	572	7.5	0.05	0.5	0.05	2.1	12	12	4.20905	2.97342	0.309183	0.0259818	0.00974316	0	0	0.318277	0.163685	0.105486	0.0337763	0.0129909	0.0259818	0.00311781	21.435	0.285799	2.02658	7.43079	0.0974316	0.000649544	0.00649544	0.000649544
28540	Pied de porc demi-sel		137	75	11.6	0.01	0	0.01	0	10	2.95	5.68	0.78	11	0	0.21	946	11	87	13	32	0.022	0.31	0.037	0.2	10	12	0.136303	4.62669	0.0115409	9.94909e-06	0	9.94909e-06	0	0.00994909	0.00293498	0.00565108	0.000776029	0.010944	0	0.000208931	0.941184	0.010944	0.0865571	0.0129338	0.0318371	2.1888e-05	0.000308422	3.68116e-05
28700	Jambon de porc à cuire ou Jambon à rôtir/cuire au four		161	70.1	19.9	0	0	0	0	9.08	3.11	4.01	1.07	2.5	0	0.23	64	22	217	338	7.67	0.026	0.88	0.094	2.15	11	10	0.367403	4.32442	0.0454119	0	0	0	0	0.0207206	0.00709704	0.00915085	0.00244175	0.00570502	0	0.000524862	0.146048	0.0502042	0.495196	0.771318	0.017503	5.93322e-05	0.00200817	0.000214509
28720	Lardon fumé, cru		275	55.7	16.7	0.96	0.8	0.16	0.34	22.6	8	10.4	2.92	1	0	0.19	1100	23.8	122	596	18.2	0.05	0.6	0.05	1.2	2.5	11.1	0.00726486	3.43609	0.000441175	2.5361e-05	2.11341e-05	4.22683e-06	8.98201e-06	0.000597039	0.000211341	0.000274744	7.71396e-05	2.64177e-05	0	5.01936e-06	0.0290594	0.00062874	0.00322296	0.0157449	0.000480801	1.32088e-06	1.58506e-05	1.32088e-06
28725	Lardon fumé, cuit		261	54.6	14.7	0.8	0.8	0	0	22.1	8.25	9.52	2.98	0	0	0.34	1040	21	296	428	10	0.027	0.82	0.054	1.7	10	12	2.85321	3.36823	0.160698	0.00874548	0.00874548	0	0	0.241594	0.0901878	0.104071	0.0325769	0	0	0.00371683	11.3691	0.229569	3.23583	4.67883	0.109319	0.00029516	0.00896412	0.00059032
28727	Filet de bacon		118	70.1	23.1	0.7	0.1	0	0	2.6	1.02	1.15	0.31	10.5	0	0.45	1270	23	190	470	3.8	0.005	0.4	0.03	1.4	10	10	0.336659	4.32442	0.0659053	0.00199713	0.000285305	0	0	0.00741792	0.00291011	0.003281	0.000884444	0.029957	0	0.00128387	3.62337	0.06562	0.542079	1.34093	0.0108416	1.42652e-05	0.00114122	8.55914e-05
28800	Jambon cru		225	50.1	25.9	0.76	0.75	0	0	13.2	5.09	6.07	1.57	5.25	0	0.21	2250	36.2	228	591	10.4	0.012	0.97	0.079	2.37	5.66	1.2	1.71464	3.09063	0.197374	0.00579166	0.00571546	0	0	0.100592	0.0387889	0.0462571	0.0119644	0.0400082	0	0.00160033	17.1464	0.275866	1.7375	4.50378	0.0792543	9.14473e-05	0.00739199	0.000602028
28801	Jambon cru, fumé		246	55.8	24.2	0.98	0.53	0	0	16.1	6.72	7.12	1.8	0	0	0.03	2050	20	275	256	5.16	0.05	0.9	0.05	0.28	24.2	2.5	0.00689439	3.44226	0.000678228	2.74654e-05	1.48538e-05	0	0	0.000451218	0.000188334	0.000199545	5.04467e-05	0	0	8.40779e-07	0.0574532	0.000560519	0.00770714	0.00717465	0.000144614	1.4013e-06	2.52234e-05	1.4013e-06
28802	Jambon sec, découenné, dégraissé		192	56.2	26.3	0.3	0.3	0	0	9.5	3.47	4.55	1.03	5.25	0	0.21	2410	20	230	462	8.3	0.05	1.4	0.06	2.37	10	1.2	0.00202556	3.46694	0.00027746	3.16494e-06	3.16494e-06	0	0	0.000100223	3.66078e-05	4.80016e-05	1.08663e-05	5.53864e-05	0	2.21546e-06	0.025425	0.000210996	0.00242645	0.004874	8.75633e-05	5.2749e-07	1.47697e-05	6.32988e-07
28811	Jambon de Bayonne		228	48.6	28	0.63	0.5	0	0	12.6	4.93	5.79	1.31	5.25	0	0.21	2270	20	229	554	8.3	0.05	0.9	0.06	2.37	10	2.5	0.749177	2.9981	0.0920041	0.00207009	0.00164293	0	0	0.0414019	0.0161993	0.0190251	0.00430448	0.0172508	0	0.000690031	7.45891	0.0657172	0.752462	1.82037	0.0272727	0.000164293	0.00295728	0.000197152
28844	Jambon sec de Parme		248	52.2	27.2	0.3	0.3	0	0	15.4	5.42	7.69	1.53	5.25	0	0.21	2180	20	229	462	16	0.05	0.7	0.06	2.37	10	2.5	0.0840496	3.22018	0.00921834	0.000101673	0.000101673	0	0	0.00521921	0.00183689	0.00260622	0.000518532	0.00177928	0	7.1171e-05	0.738823	0.00677819	0.0776103	0.156576	0.00542255	1.69455e-05	0.000237237	2.03346e-05
28845	Jambon sec Serrano		235	54.1	30.4	0.76	0.36	0	0	12.3	5.2	5.29	1.27	5.25	0	0.21	1990	20	229	462	8.3	0.05	0.9	0.06	2.37	10	2.5	0.164832	3.33739	0.021323	0.000533074	0.000252509	0	0	0.00862738	0.00364735	0.00371048	0.000890795	0.00368242	0	0.000147297	1.39581	0.0140283	0.160624	0.324053	0.00582173	3.50707e-05	0.000631272	4.20848e-05
28850	Coppa		284	49.5	25	1	0.5	0	0	20	6.83	5.92	2.17	5.25	0	0.21	1800	20	229	462	8.3	0.05	0.9	0.06	2.37	10	12	0.106023	3.05362	0.00933301	0.00037332	0.00018666	0	0	0.00746641	0.00254978	0.00221006	0.000810105	0.00195993	0	7.83973e-05	0.671977	0.00746641	0.0854904	0.172474	0.00309856	1.8666e-05	0.000335988	2.23992e-05
28858	Pancetta ou Poitrine roulée sèche		342	43.9	20.2	0.75	0.43	0	0	28.8	12.5	11.7	3.17	10.5	0	0.94	1650	18	160	370	6.2	0.05	0.71	0.06	2.5	10	10	0.00847335	2.70816	0.000500473	1.85819e-05	1.06536e-05	0	0	0.000713546	0.000309699	0.000289878	7.85396e-05	0.000260147	0	2.32893e-05	0.0408802	0.000445966	0.00396414	0.00916708	0.00015361	1.23879e-06	1.75909e-05	1.48655e-06
28860	Viande des Grisons		209	49.5	38.9	1	1	0	0	5.47	2.52	1.25	0.098	3	0	0.005	1530	46.6	278	660	30.8	0.05	1.8	0.15	5.9	9	53.8	0.0885835	3.05362	0.0164876	0.000423845	0.000423845	0	0	0.00231843	0.00106809	0.000529806	4.15368e-05	0.00127153	0	2.11922e-06	0.648482	0.0197512	0.117829	0.279737	0.0130544	2.11922e-05	0.00076292	6.35767e-05
28900	Jambon cuit, supérieur		125	73.3	20.8	0.81	0.77	0	0.075	4.28	1.58	1.12	0.34	0	0	0.25	749	22.5	193	362	10	0.1	0.54	0.2	2	10.4	2.5	1.88718	4.52182	0.314026	0.0122289	0.011625	0	0.00113231	0.0646169	0.0238539	0.0169091	0.00513312	0	0	0.00377435	11.308	0.339692	2.9138	5.46526	0.150974	0.00150974	0.0081526	0.00301948
28901	Jambon cuit, supérieur, avec couenne		137	72.2	20.2	0.91	0.77	0	0.33	5.82	2.13	2.72	0.7	6.5	0	0.24	744	22.8	265	366	7.39	0.023	0.47	0.067	1.7	11	10	2.31545	4.45396	0.341402	0.01538	0.0130139	0	0.00557737	0.0983645	0.0359994	0.045971	0.0118308	0.109857	0	0.00405627	12.5744	0.385345	4.47879	6.18581	0.124899	0.000388726	0.00794352	0.00113237
28906	Jambon cuit, supérieur, découenné dégraissé		119	72.8	20.3	1.03	0.82	0	0.32	3.66	1.24	0.98	0.3	0	0	0.17	722	22.6	210	313	10	0.1	0.8	0.2	2.2	11	6	9.56694	4.49098	1.63201	0.0828063	0.0659235	0	0.0257262	0.294244	0.0996892	0.0787866	0.0241183	0	0	0.0136671	58.0448	1.81692	16.8828	25.1635	0.803945	0.00803945	0.0643156	0.0160789
28907	Jambon cuit, supérieur, à teneur réduite en sel		121	73.2	20.8	0.74	0.74	0	0.21	3.83	1.5	1.31	0.46	6.5	0	0.24	575	22.8	214	366	7.39	0.023	0.47	0.067	1.7	11	10	0.0137377	4.51565	0.00236153	8.40159e-05	8.40159e-05	0	2.38423e-05	0.000434839	0.000170302	0.000148731	5.22261e-05	0.000737977	0	2.72484e-05	0.0652826	0.0025886	0.0242965	0.0415538	0.000839023	2.6113e-06	5.33614e-05	7.60684e-06
28929	Dés, allumettes, râpé ou haché de jambon de volaille		132	71.8	18	1.58	1.25	0	0.5	5.88	2.35	2.01	0.7	6.5	0	0.24	850	22.8	214	366	7.39	0.023	0.47	0.067	1.7	11	10	0.00539054	4.42929	0.000735074	6.45232e-05	5.10468e-05	0	2.04187e-05	0.000240124	9.5968e-05	8.20833e-05	2.85862e-05	0.000265443	0	9.80099e-06	0.0347118	0.000931094	0.00873921	0.0149465	0.000301789	9.39261e-07	1.91936e-05	2.73611e-06
28960	Jambonneau, cuit		162	65.5	23.2	0.4	0.4	0	0	7.52	2.93	2.47	0.9	6.5	0	0.24	910	22.8	123	366	7.39	0.023	0.47	0.067	1.7	11	10	0.510655	4.04065	0.0731308	0.00126088	0.00126088	0	0	0.0237045	0.00923592	0.00778591	0.00283697	0.0204892	0	0.000756526	2.86849	0.07187	0.38772	1.1537	0.0232947	7.25004e-05	0.00148153	0.000211197
28963	Jambon de poulet ou Blanc de poulet en tranche		106	74.3	20.7	1.39	1.13	0	0.53	1.79	0.54	0.61	0.39	10.5	0	0.51	766	29	240	380	6.3	0.01	0.34	0.04	0.58	25	10	0.380035	4.58351	0.0742143	0.00498347	0.00405131	0	0.00190017	0.00641757	0.00193603	0.00218699	0.00139824	0.0376449	0	0.00182847	2.74629	0.103972	0.860456	1.36239	0.022587	3.58523e-05	0.00121898	0.000143409
28964	Jambon de dinde ou Blanc de dinde en tranche		104	74	20.9	1.29	1.08	0	0.39	1.67	0.54	0.57	0.46	10.5	0	0.11	763	26	230	370	7.1	0.02	0.35	0.04	0.92	25	10	0.141087	4.565	0.028353	0.00175002	0.00146513	0	0.000529075	0.00226553	0.000732566	0.000773264	0.000624037	0.0142443	0	0.000149226	1.03509	0.0352717	0.312019	0.501943	0.00963188	2.71321e-05	0.000474811	5.42641e-05
28976	Rôti de volaille en salaison, cuit		110	72.6	22	1.28	0.97	0.19	0.44	1.73	0.55	0.78	0.19	7	0	0.41	806	13.8	149	209	20.2	0.05	1.1	0.08	1.5	10	12	0.0022822	4.47864	0.00045644	2.65565e-05	2.01248e-05	3.94198e-06	9.12879e-06	3.58927e-05	1.1411e-05	1.61829e-05	3.94198e-06	0.000145231	0	8.50637e-06	0.0167223	0.000286312	0.00309134	0.00433618	0.000419094	1.03736e-06	2.2822e-05	1.65978e-06
30005	Chipolata, cuite		282	55.4	18.8	0.8	0.4	0.18	0	22.4	8.27	9.91	3.17	10.5	7.5	0.36	859	23	170	370	19	0.04	0.79	0.07	2	10	10	5.28272	3.41758	0.352181	0.0149864	0.00749322	0.00337195	0	0.41962	0.154922	0.185644	0.0593837	0.196697	0.140498	0.0067439	16.0917	0.43086	3.18462	6.93123	0.355928	0.000749322	0.0147991	0.00131131
30011	Saucisse de Toulouse, cuite		274	54.9	18.8	0	0	0	0	22.1	8.2	9.94	2.96	14	15	0.35	686	18.2	141	650	11.5	0.05	0.9	0.05	2.2	9	8	4.68168	3.38674	0.321225	0	0	0	0	0.37761	0.140109	0.169839	0.0505758	0.23921	0.256296	0.00598025	11.7213	0.310973	2.40919	11.1062	0.196494	0.000854321	0.0153778	0.000854321
30050	Chair à saucisse, crue		265	56.7	23	0.14	0	0	0	19.2	8.14	7.9	0.52	3	0	0.12	75	20	115	304	24	0.011	2.48	0.08	4.3	19.4	6.1	2.00927	3.49778	0.174389	0.0010615	0	0	0	0.145577	0.0617186	0.0598989	0.00394271	0.0227464	0	0.000909856	0.56866	0.151643	0.871945	2.30497	0.181971	8.34035e-05	0.0188037	0.000606571
30104	Saucisse de Morteau		397	43.7	16	1	0.5	0	0	36.6	13.5	16.1	4.58	10.5	7.5	0.37	1040	18.2	152	257	18.3	0.05	1.02	0.081	1.95	7	7	0.830712	2.69582	0.0334796	0.00209247	0.00104624	0	0	0.0765846	0.0282484	0.0336888	0.00958353	0.021971	0.0156936	0.000774216	2.17617	0.038083	0.318056	0.537766	0.0382923	0.000104624	0.00213432	0.00016949
30105	Saucisse de Montbéliard		319	50.5	17.3	1	0.75	0	0	27.3	10.5	12	3.41	6.5	0	0.34	931	26.8	146	311	29.9	0.05	0.5	0.1	2	2.5	29.7	0.636532	3.11531	0.0345204	0.0019954	0.00149655	0	0	0.0544744	0.0209517	0.0239448	0.00680431	0.0129701	0	0.000678435	1.85772	0.0534767	0.291328	0.620569	0.0596624	9.97699e-05	0.000997699	0.00019954
30108	Saucisse de Morteau, bouillie/cuite à l'eau		323	49.6	15.2	0	0	0	0	29.1	12.2	11.9	3.66	11	15	0.13	809	15	126	230	8.4	0.05	0.8	0.05	1.9	7	9	1.66675	3.05979	0.0784353	0	0	0	0	0.150162	0.0629547	0.0614066	0.0188864	0.0567624	0.0774033	0.000670828	4.17462	0.0774033	0.650187	1.18685	0.0433458	0.000258011	0.00412817	0.000258011
30125	Saucisse alsacienne fumée ou Gendarme		313	49.5	19	3.18	0.9	0	0	24.9	8.56	10.1	2.57	6	7.5	0.64	1100	21.3	202	283	18.3	0.05	2.2	0.1	1.5	7	2	1.46469	3.05362	0.0889109	0.0148809	0.00421157	0	0	0.11652	0.0400567	0.0472632	0.0120264	0.0280771	0.0350964	0.00299489	5.14747	0.0996738	0.945263	1.3243	0.0856352	0.000233976	0.0102949	0.000467952
30130	Saucisse de volaille, façon charcutière		231	59.8	16.8	1.19	0.9	0	0	17.7	6.2	7.78	2.21	10.5	7.5	0.37	859	18.2	152	257	8	0.05	1.02	0.081	1.95	7	9.5	0.183736	3.68902	0.0133626	0.000946521	0.000715856	0	0	0.0140785	0.00493145	0.00618818	0.00175782	0.00835166	0.00596547	0.000294296	0.683245	0.0144762	0.1209	0.204417	0.00636317	3.97698e-05	0.000811304	6.44271e-05
30131	Saucisse de volaille, type Knack		236	64	14	1.82	1.01	0	0	18.9	5.34	8.69	3.97	10.5	7.5	0.37	746	18.2	152	257	18.3	0.05	1.02	0.081	1.95	7	9.5	0.093299	3.94811	0.00553468	0.000719509	0.000399288	0	0	0.00747182	0.00211109	0.00343546	0.00156948	0.00415101	0.00296501	0.000146274	0.29492	0.00719509	0.0600909	0.101601	0.00723462	1.97667e-05	0.000403241	3.20221e-05
30134	Saucisse de Francfort		271	56.7	13.7	1.24	1	0.24	0.25	23.4	9	10.4	2.91	0	7.5	0.1	790	11.9	152	164	16.5	0.1	0.91	0.18	1.4	5.48	14	0.207233	3.49778	0.0104763	0.000948224	0.000764697	0.000183527	0.000191174	0.0178939	0.00688227	0.00795285	0.00222527	0	0.00573523	7.64697e-05	0.604111	0.00909989	0.116234	0.12541	0.0126175	7.64697e-05	0.000695874	0.000137645
30155	Merguez, boeuf et mouton, cuite		283	54.8	19.8	1.8	1.6	0.5	0	21.8	12	8	0.81	23	560	1.7	930	22.8	128	513	38	0.04	2.04	0.081	3.3	5	25	5.06352	3.38057	0.354267	0.0322061	0.0286277	0.00894615	0	0.390052	0.214708	0.143138	0.0144928	0.411523	10.0197	0.0304169	16.6398	0.407944	2.29021	9.17875	0.679907	0.000715692	0.0365003	0.00144928
30176	Saucisse de foie		374	50.7	11.7	0.9	0.9	0	0.3	35.9	12	15.1	2.93	102	0	2.15	810	18.2	154	143	41	0.05	5.3	0.081	2.7	58	9.5	0.45384	3.12764	0.0141977	0.00109213	0.00109213	0	0.000364043	0.0435638	0.0145617	0.0183235	0.00355549	0.123775	0	0.00260898	0.982916	0.0220853	0.186875	0.173527	0.0497526	6.06739e-05	0.00643143	9.82916e-05
30300	Saucisson sec		418	30	24.2	2.41	1.2	1.22	0.73	34.5	11.3	14.2	3.73	0	0	0.16	1900	32	237	583	14.4	0.12	1.27	0.099	2.7	5	7	0.330817	1.85068	0.0191526	0.00190734	0.000949714	0.000965543	0.000577743	0.0273043	0.00894314	0.0112383	0.00295203	0	0	0.000126629	1.50371	0.0253257	0.187569	0.461403	0.0113966	9.49714e-05	0.00100511	7.83514e-05
30301	Saucisson sec pur porc		417	32.8	28.7	1.79	1.4	0	0	32.3	12.2	14.6	4.06	0.5	0	0.58	1780	26.7	243	525	15.8	0.1	1.68	0.4	3.6	11.8	4.1	4.60215	2.02341	0.316743	0.019755	0.0154509	0	0	0.356473	0.134643	0.16113	0.0448075	0.00551816	0	0.00640107	19.6447	0.29467	2.68183	5.79407	0.174374	0.00110363	0.018541	0.00441453
30304	Rosette ou Fuseau		380	34.9	24.2	1.79	1.46	0.33	0	30.7	11.8	13.7	3.74	1	0	0.35	1790	40.3	205	488	44	0.05	1.2	0.3	2.9	7	36.2	0.767853	2.15295	0.0489001	0.00361699	0.00295017	0.00066682	0	0.0620344	0.0238439	0.0276831	0.00755729	0.00202067	0	0.000707233	3.61699	0.0814328	0.414236	0.986085	0.0889093	0.000101033	0.0024248	0.0006062
30315	Chorizo		433	34	23.5	3.05	2.01	0.19	0.93	36.1	14.3	16.3	3.93	7	663	0.41	1690	13.8	149	209	20.2	0.05	1.1	0.08	1.5	10	7	3.0068	2.09743	0.163186	0.0211795	0.0139576	0.00131938	0.00645801	0.250682	0.0993007	0.113189	0.0272903	0.0486087	4.60394	0.00284708	11.7355	0.0958286	1.03467	1.45132	0.140271	0.000347205	0.00763851	0.000555528
30350	Salami		451	33.2	17.7	1.05	0.1	0.05	0	41.8	16.2	18.3	5.24	10.5	0	1.26	1620	15	150	300	7.2	0.28	1	0.07	1.9	10	20	0.704222	2.04808	0.027638	0.00163954	0.000156147	7.80734e-05	0	0.0652693	0.0252958	0.0285749	0.00818209	0.0163954	0	0.00196745	2.52958	0.023422	0.23422	0.46844	0.0112426	0.000437211	0.00156147	0.000109303
30700	Saucisson à l'ail		280	57.2	15	1.63	0.86	0.19	0.63	23.6	9.92	10.7	2.87	7	0	0.41	783	9	174	230	9	0.05	2.3	0.08	1.5	10	7	1.1396	3.52862	0.0610498	0.00663408	0.00350019	0.000773298	0.00256409	0.0960517	0.0403743	0.0435489	0.0116809	0.0284899	0	0.0016687	3.1868	0.0366299	0.708178	0.936097	0.0366299	0.000203499	0.00936097	0.000325599
30701	Saucisson cuit pur porc		322	52.1	13.8	1.3	0.75	0.19	0	29	11.2	13	3.16	7	0	0.41	806	13.8	149	209	20.2	0.05	1.1	0.08	1.5	10	12	0.629492	3.21401	0.0269782	0.00254143	0.00146621	0.00037144	0	0.0566934	0.0218954	0.0254143	0.00617763	0.0136846	0	0.000801528	1.57569	0.0269782	0.291287	0.408584	0.0394899	9.77473e-05	0.00215044	0.000156396
30730	Cervelas		278	61.1	11.9	1.56	0.63	0.19	0.4	24.8	9.37	9.91	4.34	3	0	0.56	763	20.4	197	187	32.6	0.05	0.5	0.11	1	2.5	37.9	0.415657	3.76921	0.0177925	0.00233246	0.000941957	0.000284082	0.000598068	0.0370802	0.0140097	0.0148171	0.00648904	0.00448551	0	0.000837295	1.14081	0.0305015	0.294548	0.279597	0.0487425	7.47585e-05	0.000747585	0.000164469
30742	Saucisse de Strasbourg ou Knack		291	57.9	12.4	1.39	1.06	0	1.37	25.9	10.9	10.8	3.01	10.5	0	0.38	942	13.4	152	204	23.7	0.015	1.12	0.065	1.13	5	7	4.291	3.57181	0.182847	0.0204965	0.0156304	0	0.0202016	0.381914	0.160728	0.159254	0.0443846	0.15483	0	0.00560337	13.8905	0.197592	2.24135	3.00812	0.349473	0.000221186	0.0165152	0.000958471
30789	Mortadelle		305	55.1	15	1.4	0	0.19	0	26.7	10.6	11.5	2.91	7	0	0.5	851	26.9	127	270	36.5	0.05	0.8	0.05	1.5	2.5	27.8	0.199855	3.39908	0.00982892	0.000917365	0	0.0001245	0	0.0174955	0.00694577	0.0075355	0.00190681	0.00458683	0	0.000327631	0.557627	0.0176265	0.0832182	0.17692	0.023917	3.27631e-05	0.000524209	3.27631e-05
30999	Confiture ou Marmelade, tout type de fruits, teneur en sucre inconnue (aliment moyen)		241	39.3	0.27	59.3	59.3	0	0.87	0.1	0	0.031	0.0038	0	2.5	0.47	16	5.7	10	100	9.9	0.2	0.17	0.03	0.025	10	10	0.431522	2.42439	0.000483448	0.10618	0.10618	0	0.00155778	0.000179055	0	5.5507e-05	6.80409e-06	0	0.00447637	0.000841558	0.0286488	0.0102061	0.0179055	0.179055	0.0177264	0.00035811	0.000304393	5.37165e-05
31006	Confiture ou Marmelade, tout type de fruits (aliment moyen)		241	39.3	0.27	59.3	59.3	0	0.87	0.1	0	0.031	0.0038	0	2.5	0.47	16	5.7	10	100	9.9	0.2	0.17	0.03	0.025	10	10	10.1509	2.42439	0.0113724	2.49771	2.49771	0	0.0366443	0.00421199	0	0.00130572	0.000160055	0	0.1053	0.0197963	0.673918	0.240083	0.421199	4.21199	0.416987	0.00842397	0.00716038	0.0012636
31007	Chewing-gum, sucré		372	3	0.25	90.6	68.1	0	2.4	0.32	0.042	0.079	0.14	0	2.5	1	2.5	340	4.6	3.5	18	0.09	9.5	0.16	0.06	10	0.2	0.323559	0.185068	0.000217446	0.0788023	0.0592322	0	0.00208748	0.00027833	3.65309e-05	6.87128e-05	0.00012177	0	0.00217446	0.000869783	0.00217446	0.295726	0.004001	0.00304424	0.0156561	7.82804e-05	0.00826294	0.000139165
31008	Miel		326	17.6	0.56	81.7	79.8	0	0	0	0	0	0	0	0	0	4.11	4.26	5.6	70.3	7.93	0.16	0.18	0.017	0.098	5	0.5	5.4204	1.08573	0.00931111	1.35842	1.32683	0	0	0	0	0	0	0	0	0	0.0683369	0.0708309	0.0931111	1.16888	0.131852	0.00266032	0.00299286	0.000282659
31016	Sucre blanc		399	0.17	0	99.8	99.8	0	0	0	0	0	0	0	0	0	2.17	1.65	0	13.5	3.69	0.0063	0.077	0.0055	0.02	5	0.3	128.856	0.0104872	0	32.2302	32.2302	0	0	0	0	0	0	0	0	0	0.700797	0.532864	0	4.35979	1.19168	0.00203457	0.024867	0.00177621
31017	Sucre roux		387	1.31	0.12	97.3	95.5	0	0	0	0	0	0	0	0	0	41.5	18.5	3	227	83	0.064	1.91	0.051	0.045	1	0.3	4.27532	0.0808129	0.00132568	1.07491	1.05502	0	0	0	0	0	0	0	0	0	0.458464	0.204376	0.033142	2.50774	0.916929	0.000707029	0.0211004	0.000563414
31034	Sirop d'érable		262	32.3	0.04	67.1	62.6	0	0	0.06	0.007	0.011	0.017	0	0	0	6.57	21	2	219	106	2.6	0.11	0.018	1.09	1	0.3	0.071612	1.99256	1.09331e-05	0.0183403	0.0171104	0	0	1.63997e-05	1.9133e-06	3.00661e-06	4.64658e-06	0	0	0	0.00179577	0.0057399	0.000546657	0.0598589	0.0289728	0.000710654	3.00661e-05	4.91991e-06
31044	Sucre vanillé		397	0.13	0.1	99	97.2	0	0.37	0.33	0.053	0.005	0.005	0	0	0	3.86	11.4	2.5	2	45.5	0.064	0.14	0.014	0.072	1	0.3	0.0193856	0.0080196	4.88302e-06	0.00483419	0.00474629	0	1.80672e-05	1.6114e-05	2.588e-06	2.44151e-07	2.44151e-07	0	0	0	0.000188485	0.000556664	0.000122075	9.76604e-05	0.00222177	3.12513e-06	6.83623e-06	6.83623e-07
31054	Chewing-gum, sans sucre		228	4.3	0.69	78.1	0.015	0.18	1.98	0.45	0.17	0.055	0.14	0	0	0.16	10.3	130	60	73	3700	0.2	5.2	0.09	0.09	25	10	0.407111	0.265264	0.00123205	0.139453	2.67836e-05	0.000321403	0.00353544	0.000803509	0.000303548	9.82066e-05	0.00024998	0	0	0.000285692	0.0183914	0.232125	0.107134	0.130347	6.60663	0.000357115	0.00928499	0.000160702
31064	Édulcorant à la saccharine		287	8.8	1.25	88.8	42.9	0	0	0	0	0	0	0	0	0	428	0	0	4	0	0.064	0.04	0	0.01	0	0.3	0.033413	0.542865	0.000145527	0.0103382	0.00499448	0	0	0	0	0	0	0	0	0	0.0498284	0	0	0.000465686	0	7.45097e-06	4.65686e-06	0
31067	Mélasse de canne		300	21.9	0	74.7	74.7	0	0	0.1	0.018	0.032	0.05	0	0	0	37	242	31	1460	205	1.53	4.72	0.49	0.29	1	0.3	0.00987161	1.35099	0	0.00245803	0.00245803	0	0	3.29054e-06	5.92296e-07	1.05297e-06	1.64527e-06	0	0	0	0.0012175	0.00796309	0.00102007	0.0480418	0.0067456	5.03452e-05	0.000155313	1.61236e-05
31076	Sucre allégé à l'aspartame		398	0.5	0.81	98.7	98.7	0	0	0	0	0	0	0	0	0	1.8	11.4	2.5	70.3	45.5	0.064	0.14	0.014	0.072	1	0.2	0.115647	0.0308446	0.000235361	0.0286792	0.0286792	0	0	0	0	0	0	0	0	0	0.000523026	0.00331249	0.000726424	0.0204271	0.0132209	1.85965e-05	4.06798e-05	4.06798e-06
31077	Fructose		317	0.2	0	99.8	48.3	0	0	0	0	0	0	0	0	0	0.1	0	0.1	0.3	0.1	0.01	0.07	0.01	0.01	0.5	5	0.395172	0.0123378	0	0.12441	0.0602107	0	0	0	0	0	0	0	0	0	0.00012466	0	0.00012466	0.000373979	0.00012466	1.2466e-05	8.72619e-05	1.2466e-05
31087	Édulcorant à base d'extrait de stévia		238	0.88	0	98	0.3	0	0.5	0.2	0	0.037	0.0081	0	0	0	169	11.4	2.5	70.3	45.5	0.064	0.14	0.014	0.072	1	0.3	0.0656206	0.0542865	0	0.0270202	8.2715e-05	0	0.000137858	5.51434e-05	0	1.02015e-05	2.23331e-06	0	0	0	0.0465961	0.00314317	0.000689292	0.0193829	0.0125451	1.76459e-05	3.86003e-05	3.86003e-06
31089	Sirop d'agave		305	21.8	0.25	78.1	70.2	0	0	0.5	0.25	0.005	0.005	0	0	0	3.99	11.4	2.5	70.3	45.5	0.064	0.14	0.014	0.072	1	0.3	0.575376	1.34483	0.000471619	0.147334	0.132431	0	0	0.000943239	0.000471619	9.43239e-06	9.43239e-06	0	0	0	0.00752705	0.0215058	0.00471619	0.132619	0.0858347	0.000120735	0.000264107	2.64107e-05
32140	Flocon d'avoine précuit		366	11	11	58	1.84	56.2	10.6	7.7	1.36	2.25	1.94	0	0	1.5	4	104	387	325	50	2.68	3.8	0.35	2.6	1.68	0	0.643804	0.678582	0.0193493	0.102024	0.00323661	0.0988574	0.0186457	0.0135445	0.00239228	0.00395781	0.00341252	0	0	0.00263854	0.00703611	0.182939	0.680744	0.571684	0.0879514	0.0047142	0.00668431	0.00061566
34000	Lapin, viande braisée		197	58.8	30.4	0	0	0	0	8.41	2.73	2.78	1.8	0	0	0.44	37	20	226	300	20	0.032	2.37	0.18	2.37	10.3	3	0.0652952	3.62733	0.010076	0	0	0	0	0.00278747	0.000904852	0.000921424	0.000596606	0	0	0.000145837	0.0122636	0.00662895	0.0749072	0.0994343	0.00662895	1.06063e-05	0.000785531	5.96606e-05
34002	Lapin, viande cuite		167	68.2	20.5	0.5	0	0	0	9.2	3.42	2.64	2.06	0	0	1.22	63.2	21.8	200	340	13.5	0.015	2.27	0.063	1.79	73	5	2.46286	4.20721	0.302328	0.00737385	0	0	0	0.135679	0.0504371	0.0389339	0.0303802	0	0	0.0179922	0.932054	0.3215	2.94954	5.01421	0.199094	0.000221215	0.0334773	0.000929105
34004	Lapin de garenne, viande, cuite		164	61.4	33	0	0	0	0	3.51	1.05	0.95	0.68	0	0	0.41	45	31	240	343	18	0.013	4.85	0.18	2.38	10.3	5	0.0541092	3.78772	0.0108878	0	0	0	0	0.00115807	0.000346431	0.000313438	0.000224355	0	0	0.000135273	0.014847	0.010228	0.0791843	0.113167	0.00593882	4.28915e-06	0.00160018	5.93882e-05
34500	Grenouille, cuisse, crue		95.7	76.7	21.9	0	0	0	0	0.9	0.3	0.2	0.22	10.5	0	1.89	87.8	22	92	110	39	0.06	0.52	0.03	0.56	25	10	0.0391214	4.73157	0.00895255	0	0	0	0	0.000367913	0.000122638	8.17585e-05	8.99343e-05	0.00429232	0	0.000772618	0.035892	0.00899343	0.0376089	0.0449672	0.0159429	2.45275e-05	0.000212572	1.22638e-05
36004	Poulet, cuisse, viande et peau, rôtie/cuite au four		213	62.2	25.9	2	0	0	0	11.3	4.44	4.28	1.97	8.5	0	0.19	91	25.1	200	324	14.6	0.015	1.2	0.063	2.16	17.3	5	6.371	3.83707	0.77469	0.0598216	0	0	0	0.337992	0.132804	0.128018	0.0589243	0.254242	0	0.00568305	2.72188	0.750761	5.98216	9.6911	0.436698	0.000448662	0.035893	0.00188438
36005	Poulet, viande et peau, rôti/cuit au four		213	59.7	28.9	2.1	0	0	0	9.88	2.78	4.36	2.19	47.5	0	0.39	160	39.6	200	414	19.4	0.013	0.68	0.05	1.27	5.66	5	2.7987	3.68285	0.37973	0.0275928	0	0	0	0.129818	0.0365276	0.057288	0.0287754	0.624123	0	0.00512438	2.10231	0.520322	2.62789	5.43973	0.254905	0.000170813	0.00893482	0.000656972
36006	Poulet, cuisse, viande, rôti/cuit au four		171	66.9	24.8	0	0	0	0	8.03	2.2	3.09	1.75	11.8	0	0.2	104	22.6	197	252	11.6	0.018	1.2	0.07	2.3	29	5	8.05111	4.12701	1.16765	0	0	0	0	0.378073	0.103582	0.145485	0.0823944	0.555574	0	0.0094165	4.89658	1.06406	9.27525	11.8648	0.546157	0.000847485	0.056499	0.00329578
36018	Poulet, blanc, sans peau, cuit		141	67.5	30.1	0	0	0	0	2	0.58	0.78	0.46	10.5	0	0.11	56	37	270	440	4.7	0.005	0.39	0.03	0.72	10	10	13.0007	4.16402	2.77533	0	0	0	0	0.184407	0.053478	0.0719188	0.0424136	0.968137	0	0.0101424	5.1634	3.41153	24.895	40.5696	0.433357	0.000461018	0.0359594	0.00276611
36030	Poulet, cuisse, viande, bouilli/cuit à l'eau		188	64.3	24.8	0.7	0	0	0	9.52	2.67	3.71	2	10	0	0.27	90	26.2	164	262	5.8	0.05	1.2	0.05	2.4	10	3	1.95869	3.96662	0.258381	0.00729301	0	0	0	0.099185	0.0278176	0.038653	0.0208372	0.104186	0	0.00281302	0.937673	0.272967	1.70865	2.72967	0.0604278	0.000520929	0.0125023	0.000520929
36031	Poulet, cuisse, viande et peau, bouilli/cuit à l'eau		188	64.1	26.1	0.28	0.1	0.18	0	9.1	2.64	4.04	1.9	10.5	2.5	0.54	73	23	180	250	15	0.02	0.96	0.09	2.3	10	10	0.668	3.95428	0.0927383	0.000994894	0.000355319	0.000639575	0	0.032334	0.00938043	0.0143549	0.00675107	0.0373085	0.00888298	0.00191872	0.259383	0.0817234	0.639575	0.888298	0.0532979	7.10638e-05	0.00341106	0.000319787
36033	Poulet, aile, viande et peau, rôti/cuit au four		247	59.4	23.8	0	0	0	0	16.9	4.98	7.71	3.59	12	0	0.69	98	19	147	212	18	0.011	0.84	0.041	1.64	10	5	1.30534	3.66434	0.125778	0	0	0	0	0.089313	0.0263183	0.0407458	0.0189724	0.0634175	0	0.00364651	0.51791	0.100411	0.776865	1.12038	0.0951263	5.81327e-05	0.00443923	0.000216677
36035	Poulet, manchons marinés, rôtis/cuits au four		213	60.2	22.4	2.1	0.6	1.5	0.9	12.6	3.16	4.56	2.04	1	62	0.7	674	18.4	168	259	34.1	0.5	1.1	0.5	1.5	5.7	41	0.151609	3.71369	0.0159439	0.00149474	0.000427067	0.00106767	0.000640601	0.00896842	0.00224922	0.00324571	0.00145203	0.000711779	0.0441303	0.000498245	0.479739	0.0130967	0.119579	0.184351	0.0242717	0.00035589	0.000782957	0.00035589
36051	Chapon, viande et peau, rôti/cuit au four		221	58.7	29	0	0	0	0	11.7	3.26	4.75	2.52	14.5	0	0.35	49	24	246	255	14	0.021	1.49	0.069	1.74	10	5	0.152409	3.62116	0.0199993	0	0	0	0	0.00806869	0.0022482	0.00327575	0.00173787	0.00999966	0	0.000241371	0.033792	0.0165512	0.169649	0.175856	0.00965485	1.44823e-05	0.00102755	4.75846e-05
36102	Caille, viande et peau, cuite		206	60.5	26.8	0	0	0	0	10.9	3.06	4.25	3.03	70	0	0.7	52	22	279	216	15	0.02	4.43	0.59	3.1	10	3	0.117638	3.7322	0.0153043	0	0	0	0	0.00622451	0.00174743	0.00242699	0.0017303	0.0399739	0	0.000399739	0.0296949	0.0125632	0.159325	0.123348	0.00856585	1.14211e-05	0.00252978	0.000336923
36200	Canard, viande et peau, rôti/cuit au four		331	51.8	19	0	0	0	0	28.4	9.67	12.9	3.65	63	0	0.7	59	16	156	204	11	0.019	2.7	0.23	1.86	10	5	0.822186	3.1955	0.047195	0	0	0	0	0.0705441	0.0240198	0.0320429	0.0090664	0.156489	0	0.00173876	0.146553	0.0397431	0.387495	0.506725	0.0273234	4.7195e-05	0.00670665	0.000571307
36202	Canard, viande, rôtie/cuite au four		194	63.1	23.3	0	0	0	0	11.2	3.48	3.86	1.49	23	0	0.7	154	35.8	203	392	6.78	0.036	3.35	0.35	1.92	9.08	4	2.28387	3.89259	0.2743	0	0	0	0	0.131853	0.0409685	0.045442	0.0175411	0.270769	0	0.00824078	1.81297	0.421457	2.38983	4.61484	0.0798179	0.000423812	0.039438	0.00412039
36205	Canard, magret, grillé/poêlé		222	61.7	26.7	0	0	0	0	12.8	2.46	2.01	2.69	16	15	0.46	435	31.2	273	390	5	0.05	4.8	0.5	2.1	34	15	2.95934	3.80623	0.355921	0	0	0	0	0.170629	0.0327927	0.026794	0.0358587	0.213286	0.199955	0.00613196	5.79871	0.415907	3.63919	5.19884	0.0666518	0.000666518	0.0639857	0.00666518
36302	Dinde, viande, rôtie/cuite au four		146	66.9	30.7	0.2	0	0.2	0	2.5	0.8	0.93	0.89	0	0	0.02	70	10	210	330	11	0.02	0.8	0.1	0.7	18	8	1.39523	4.12701	0.293381	0.00191128	0	0.00191128	0	0.023891	0.00764511	0.00888744	0.00850519	0	0	0.000191128	0.668947	0.0955639	2.00684	3.15361	0.10512	0.000191128	0.00764511	0.000955639
36306	Dinde, escalope, sautée/poêlée		124	66.3	28.5	0	0	0	0	1.09	0.51	0.29	0.23	1	0	0.08	65.2	44.4	293	462	5.42	0.012	0.49	0.054	1.22	6.48	4	3.75824	4.09	0.86379	0	0	0	0	0.0330362	0.0154573	0.00878944	0.00697094	0.0303084	0	0.00242467	1.97611	1.34569	8.88037	14.0025	0.164272	0.000363701	0.0148511	0.00163665
36307	Dinde, cuisse, viande sans peau, crue		151	66.7	29.1	0	0	0	0	3.84	0.96	1.26	1.03	4	0	0.06	101	44.3	222	483	9.66	0.02	1.14	0.094	3.75	5	6	0.0104757	4.11467	0.00201884	0	0	0	0	0.000266403	6.66008e-05	8.74135e-05	7.14571e-05	0.000277503	0	4.16255e-06	0.00700696	0.00307335	0.0154014	0.0335085	0.00067017	1.38752e-06	7.90884e-05	6.52133e-06
36402	Faisan, viande, rôtie/cuite au four		239	54.2	32.4	0	0	0	0	12.1	3.91	5.63	1.19	57	0	0.27	43	22	242	271	16	0.02	1.43	0.084	1.37	10	4	0.0971152	3.34356	0.0131654	0	0	0	0	0.00491671	0.00158879	0.00228769	0.000483544	0.0231614	0	0.000109712	0.0174726	0.00893948	0.0983342	0.110118	0.00650144	8.1268e-06	0.000581066	3.41325e-05
36602	Pigeon, viande, rôtie/cuite au four		213	62	23.9	0	0	0	0	13	3.74	5.46	2.73	28	0	0.06	57	26	332	256	17	0.02	5.91	0.76	3.83	10	4	0.229271	3.82473	0.0257257	0	0	0	0	0.0139931	0.0040257	0.00587709	0.00293855	0.0301389	0	6.45834e-05	0.0613543	0.0279861	0.357362	0.275556	0.0182986	2.15278e-05	0.00636147	0.000818057
36700	Pintade, crue		143	71.7	22.8	0	0	0	0	5.75	1.55	1.56	1	20	0	0.3	70.5	23	161	207	11.5	0.018	0.8	0.044	1.17	10	5	0.0164744	4.42312	0.00262668	0	0	0	0	0.000662431	0.000178568	0.00017972	0.000115205	0.00230411	0	3.45616e-05	0.00812198	0.00264972	0.0185481	0.0238475	0.00132486	2.0737e-06	9.21643e-05	5.06903e-06
40003	Cervelle, agneau, cuite		145	75.7	12.6	0.8	0	0	0	10.2	2.6	1.84	1.04	0	0	0.38	134	14	337	205	12	0.059	1.68	0.21	1.36	1.1	1	0.0184816	4.66988	0.00160599	0.000101968	0	0	0	0.00130009	0.000331395	0.000234525	0.000132558	0	0	4.84346e-05	0.0170796	0.00178443	0.0429538	0.0261292	0.00152951	7.52011e-06	0.000214132	2.67665e-05
40053	Coeur, boeuf, cuit		133	71.4	23	0.15	0	0	0	4.5	1.81	0.89	0.39	0	0	0.29	59	21	254	219	5	0.033	6.7	0.56	2.3	1.1	3	0.0654899	4.40461	0.0113253	7.38607e-05	0	0	0	0.00221582	0.000891253	0.00043824	0.000192038	0	0	0.000142797	0.0290519	0.0103405	0.125071	0.107837	0.00246202	1.62494e-05	0.00329911	0.000275747
40056	Coeur, poulet, cuit		177	64.9	26.4	0.1	0	0	0	7.92	2.26	2.01	2.3	8	0	0.38	48	20	199	132	19	0.11	9.03	0.5	7.3	1.1	5	0.0278666	4.00363	0.00415637	1.57438e-05	0	0	0	0.00124691	0.00035581	0.000316451	0.000362108	0.00125951	0	5.98265e-05	0.00755703	0.00314876	0.0313302	0.0207818	0.00299132	1.73182e-05	0.00142167	7.87191e-05
40103	Foie, agneau, cuit		157	65	23	3.16	0	0	0	5.8	1.81	0.99	0.64	7630	0	0.38	90	22.5	424	287	8.5	0.56	4.1	8.45	4.7	1.1	5	0.106586	4.0098	0.0156146	0.00214531	0	0	0	0.00393759	0.0012288	0.000672105	0.000434492	5.17996	0	0.00025798	0.0611005	0.0152751	0.287851	0.194843	0.0057706	0.000380181	0.00278347	0.00573666
40105	Foie, génisse, cuit		165	64.1	26.3	2.2	0	0	0	5.71	1.69	0.63	1.02	7730	182	0.46	77	17.8	485	351	6.14	0.32	5.8	3.46	3.82	1.1	2.5	0.349099	3.95428	0.0556443	0.00465465	0	0	0	0.0120809	0.00357562	0.00133292	0.00215807	16.3548	0.385067	0.000973246	0.162913	0.0376604	1.02614	0.742629	0.0129907	0.00067704	0.0122714	0.0073205
40107	Foie, veau, cuit		121	67.7	19	4.47	0	0	0	3.02	0.98	0.35	0.78	10500	43.5	0.64	81.5	21.5	302	341	6.5	0.29	4.5	20.1	4.6	40.9	5	0.322357	4.17636	0.050618	0.0119085	0	0	0	0.0080456	0.00261082	0.000932437	0.002078	27.9731	0.115889	0.00170503	0.217125	0.0572782	0.80456	0.90846	0.0173167	0.00077259	0.0119885	0.0535485
40113	Foie, porc, cuit		159	64.3	26	3.76	0	0	0	4.4	1.41	0.63	1.05	5410	0	0.38	49	14	241	150	10	0.3	17.9	0.63	6.72	1.1	5	0.280395	3.96662	0.0458508	0.00663072	0	0	0	0.00775936	0.00248652	0.001111	0.00185167	9.54048	0	0.000670126	0.086411	0.0246889	0.425001	0.264524	0.0176349	0.000529047	0.0315665	0.001111
40116	Foie, poulet, cuit		160	66.8	24.5	0.8	0	0	0	6.51	2.06	1.42	1.99	3980	30	0.82	76	25	405	263	11	0.36	11.6	0.5	3.98	1.1	5	0.183106	4.12084	0.0280381	0.00091553	0	0	0	0.00745012	0.00235749	0.00162507	0.00227738	4.55476	0.0343324	0.000938418	0.0869753	0.0286103	0.463487	0.30098	0.0125885	0.000411988	0.0132752	0.000572206
40203	Langue, boeuf, cuite		235	59.6	23.7	0	0	0	0	15.6	6.05	5.39	1.05	0	0	0.3	82.5	9.44	144	184	14.5	0.044	3.5	0.13	2.2	1.1	5	1.30958	3.67668	0.132073	0	0	0	0	0.0869339	0.0337147	0.0300368	0.00585132	0	0	0.00167181	0.459746	0.0526061	0.802467	1.02537	0.0808039	0.000245198	0.0195044	0.000724449
40305	Ris, veau, braisé ou sauté/poêlé		136	73.3	21	0	0	0	0	5.8	1.65	2.3	0.39	0	0	0.09	59	24	627	435	4	0.021	0.5	0.072	1	1.1	4	0.156059	4.52182	0.0240973	0	0	0	0	0.00665544	0.00189336	0.00263923	0.000447521	0	0	0.000103274	0.0677019	0.0275397	0.719476	0.499158	0.00458996	2.40973e-05	0.000573745	8.26192e-05
40403	Rognon, boeuf, cuit		171	66.9	27	0	0	0	0	7	1.29	1.36	1.08	0	0	0.08	94	12	304	135	19	0.19	9.5	0.56	3.1	1.1	10	0.101249	4.12701	0.0159867	0	0	0	0	0.00414469	0.000763807	0.000805254	0.000639467	0	0	4.73679e-05	0.0556573	0.00710518	0.179998	0.0799333	0.0112499	0.000112499	0.00562494	0.000331575
40405	Rognon, porc, cuit		144	68.7	25.4	0	0	0	0	4.7	1.51	1.55	0.38	78	0	0.38	80	18	240	143	13	0.15	5.29	0.68	4.15	1.1	10	0.019848	4.23805	0.00350097	0	0	0	0	0.000647818	0.000208129	0.000213642	5.23768e-05	0.010751	0	5.23768e-05	0.0110267	0.002481	0.0330801	0.0197102	0.00179184	2.0675e-05	0.00072914	9.37268e-05
40406	Rognon, agneau, braisé		127	70.5	23.7	0	0	0	0	3.62	1.23	0.77	0.67	137	0	0.41	151	20	290	178	18	0.14	12.4	0.37	3.8	1.1	10	0.00331805	4.34909	0.000619195	0	0	0	0	9.45775e-05	3.21354e-05	2.01173e-05	1.75047e-05	0.00357931	0	1.07118e-05	0.00394508	0.000522528	0.00757665	0.0046505	0.000470275	3.65769e-06	0.000323967	9.66676e-06
40408	Rognon, veau, braisé ou sauté/poêlé		167	67.7	26	0	0	0	0	7	2.14	1.36	0.94	260	0	1.2	81.5	20	304	205	12	0.15	5	0.56	4.9	1.1	10	0.0961654	4.17636	0.0149719	0	0	0	0	0.00403088	0.0012323	0.000783143	0.00054129	0.149719	0	0.000691009	0.046931	0.0115168	0.175056	0.118047	0.00691009	8.63761e-05	0.0028792	0.000322471
40701	Gésier, canard, confit, appertisé		149	63.4	32.4	0	0.1	0.5	0.5	2.1	0.7	0.55	0.31	1	15	0.12	766	18.3	126	214	8.5	0.05	9.4	0.05	6	37	32	0.554229	3.9111	0.120517	0	0.000371966	0.00185983	0.00185983	0.00781128	0.00260376	0.00204581	0.00115309	0.00371966	0.0557948	0.000446359	2.84926	0.0680697	0.468677	0.796006	0.0316171	0.000185983	0.0349648	0.000185983
53101	Banane plantain, cuite		125	67.3	0.79	28.9	14	13.5	2.3	0.18	0.069	0.015	0.033	0	369	0.13	5	32	28	465	2	0.15	0.58	0.066	0.13	5	3	0.154037	4.15169	0.000973514	0.0356134	0.0172521	0.016636	0.00283428	0.000221813	8.50284e-05	1.84844e-05	4.06658e-05	0	0.454717	0.000160199	0.00616148	0.0394335	0.0345043	0.573018	0.00246459	0.000184844	0.000714732	8.13315e-05
53201	Taro, tubercule, cru		131	63.8	0.52	29.5	0.49	13.5	5.1	0.11	0.023	0.009	0.046	0	39	2.93	15	30	76	484	18	0.45	0.72	0.2	0.27	5	3	0.0150027	3.93577	5.95526e-05	0.00337847	5.61169e-05	0.00154608	0.000584074	1.25977e-05	2.63406e-06	1.03072e-06	5.26812e-06	0	0.00446645	0.000335556	0.00171786	0.00343573	0.00870384	0.0554297	0.00206144	5.15359e-05	8.24575e-05	2.29048e-05
53503	Igname, épluchée, bouillie/cuite à l'eau		109	70.1	1.49	23.6	0.49	13.5	3.9	0.14	0.029	0.005	0.06	0	73	0.34	8	18	49	670	14	0.37	0.52	0.15	0.2	5	3	0.0513033	4.32442	0.000701302	0.0111079	0.00023063	0.00635408	0.00183562	6.58941e-05	1.36495e-05	2.35336e-06	2.82403e-05	0	0.0343591	0.000160029	0.00376538	0.0084721	0.023063	0.315351	0.00658941	0.000174149	0.00024475	7.06009e-05
54034	Manioc, racine cuite		132	65.2	0.69	32	1.18	13.5	0.4	0.043	0.011	0.00093	0.018	0	25	0.13	10	21.7	40.5	452	12.1	0.038	0.6	0.018	0.35	5	3	0.592909	4.02214	0.0030993	0.143735	0.00530025	0.0606384	0.00179669	0.000193145	4.94091e-05	4.17731e-06	8.08512e-05	0	0.112293	0.000583925	0.0449173	0.0974706	0.181915	2.03026	0.05435	0.000170686	0.00269504	8.08512e-05
58103	Gombo, fruit, cuit		22.4	92.6	1.87	2.01	2.01	0	2.5	0.21	0.045	0.028	0.046	0	170	0.27	6	36	32	135	77	0.29	0.28	0.085	0.43	10	10	0.00061496	5.71242	5.13382e-05	5.51817e-05	5.51817e-05	0	6.8634e-05	5.76525e-06	1.23541e-06	7.687e-07	1.26286e-06	0	0.00466711	7.41247e-06	0.000164721	0.000988329	0.000878515	0.00370623	0.00211393	7.96154e-06	7.687e-06	2.33355e-06
76000	Eau minérale Abatilles, embouteillée, non gazeuse, faiblement minéralisée (Arcachon, 33)		0	100	0	0	0	0	0	0	0	0	0	0	0	0	10	0.9	0.0015	0.4	1.9	0.0001	0.01	0.00025	0.00025	0.5	0	0	6.16892	0	0	0	0	0	0	0	0	0	0	0	0	0.0569302	0.00512372	8.53953e-06	0.00227721	0.0108167	5.69302e-07	5.69302e-05	1.42326e-06
76001	Eau minérale Aix-les-Bains, embouteillée, non gazeuse, faiblement minéralisée (Aix-les-Bains, 73)		0	100	0	0	0	0	0	0	0	0	0	0	0	0	0.44	2.25	0.0015	0.08	8.23	5e-05	0.0005	0.00025	0.00025	0.5	0	0	6.16892	0	0	0	0	0	0	0	0	0	0	0	0	0.00583357	0.0298307	1.98872e-05	0.00106065	0.109114	6.62905e-07	6.62905e-06	3.31453e-06
76004	Eau minérale Amanda, embouteillée, non gazeuse, fortement minéralisée (St-Amand, 59)		0	99.9	0	0	0	0	0	0	0	0	0	0	0	0	5.5	6.6	0.0015	0.61	24	0.0004	0.04	0.00025	0.00025	0.5	0	0	6.16276	0	0	0	0	0	0	0	0	0	0	0	0	0.00455593	0.00546712	1.24253e-06	0.000505295	0.0198804	3.31341e-07	3.31341e-05	2.07088e-07
76006	Eau minérale Arcens, embouteillée, gazeuse, moyennement minéralisée (Arcens, 07)		0	99.9	0	0	0	0	0	0	0	0	0	0	0	0	25.2	1.6	0.0015	0.53	0.9	0.015	0.0006	0.00025	0.00025	0.5	0	0	6.16276	0	0	0	0	0	0	0	0	0	0	0	0	0.0636347	0.0040403	3.78778e-06	0.00133835	0.00227267	3.78778e-05	1.51511e-06	6.31297e-07
76010	Eau minérale Celtic, embouteillée, gazeuse ou non gazeuse, très faiblement minéralisée (Niederbronn, 67)		0	100	0	0	0	0	0	0	0	0	0	0	0	0	0.11	0.4	0.0015	0.19	1.05	0.0001	0.0005	0.00025	0.00025	0.5	0	0	6.16892	0	0	0	0	0	0	0	0	0	0	0	0	0.000253944	0.000923432	3.46287e-06	0.00043863	0.00242401	2.30858e-07	1.15429e-06	5.77145e-07
76013	Eau minérale Chateauneuf, embouteillée, gazeuse, fortement minéralisée (Chateauneuf, 63)		0	99.8	0	0	0	0	0	0	0	0	0	0	0	0	70.3	3	0.0015	4.4	11.9	0.004	0.0005	0.00025	0.00025	0.5	0	0	6.15659	0	0	0	0	0	0	0	0	0	0	0	0	0.0546667	0.00233286	1.16643e-06	0.00342153	0.00925368	3.11048e-06	3.8881e-07	1.94405e-07
76016	Eau minérale Contrex, embouteillée, non gazeuse, fortement minéralisée (Contrexéville, 88)		0	99.8	0	0	0	0	0	0	0	0	0	0	0	0	0.94	7.45	0.0015	0.28	46.8	0.0015	0.0005	0.0042	0.0095	5	0	0	6.15659	0	0	0	0	0	0	0	0	0	0	0	0	0.18725	1.48406	0.000298803	0.0557766	9.32266	0.000298803	9.9601e-05	0.000836649
76020	Eau minérale Evian, embouteillée, non gazeuse, faiblement minéralisée (Evian, 74)		0	100	0	0	0	0	0	0	0	0	0	0	0	0	0.65	2.6	0.0015	0.1	8	0.00038	0.0063	0.0015	0.0038	0.75	0	0	6.16892	0	0	0	0	0	0	0	0	0	0	0	0	0.235656	0.942623	0.000543821	0.0362547	2.90038	0.000137768	0.00228405	0.000543821
76022	Eau minérale Hépar, embouteillée, non gazeuse, fortement minéralisée (Vittel, 88)		0	99.7	0	0	0	0	0	0	0	0	0	0	0	0	1.42	11.9	0.0015	0.41	54.9	0.00075	0.0005	0.0012	0.005	5	0	0	6.15042	0	0	0	0	0	0	0	0	0	0	0	0	0.161234	1.35118	0.000170317	0.0465534	6.23361	8.51587e-05	5.67724e-05	0.000136254
76024	Eau minérale Vernière, embouteillée, gazeuse, moyennement minéralisée (Les Aires, 34)		0	99.9	0	0	0	0	0	0	0	0	0	0	0	0	11	7.3	0.0015	4	18	0.04	0.0005	0.00025	0.016	0.5	0	0	6.16276	0	0	0	0	0	0	0	0	0	0	0	0	0.0394893	0.0262065	5.3849e-06	0.0143597	0.0646188	0.000143597	1.79497e-06	8.97483e-07
76025	Eau minérale Luchon, embouteillée, non gazeuse, faiblement minéralisée (Luchon, 31)		0	100	0	0	0	0	0	0	0	0	0	0	0	0	0.08	0.1	0.0015	0.02	2.65	5e-05	0.0005	0.00025	0.00025	0.5	0	0	6.16892	0	0	0	0	0	0	0	0	0	0	0	0	0.0026273	0.00328413	4.92619e-05	0.000656825	0.0870293	1.64206e-06	1.64206e-05	8.21031e-06
76027	Eau minérale Mont-Roucous, embouteillée, très faiblement minéralisée (Lacaune, 81)		0	100	0	0	0	0	0	0	0	0	0	0	0	0	0.31	0.05	0.0015	0.04	0.24	5e-05	0.0005	0.00025	0.00025	0.5	0	0	6.16892	0	0	0	0	0	0	0	0	0	0	0	0	0.00629487	0.0010153	3.0459e-05	0.000812241	0.00487345	1.0153e-06	1.0153e-05	5.07651e-06
76031	Eau minérale Parot, embouteillée, gazeuse, moyennement minéralisée (St-Romain-le-Puy, 42)		0	99.9	0	0	0	0	0	0	0	0	0	0	0	0	101	9.4	0.003	11	11	0.031	0.025	0.00025	0.00025	0.5	0	0	6.16276	0	0	0	0	0	0	0	0	0	0	0	0	0.119966	0.0111652	3.56335e-06	0.0130656	0.0130656	3.68213e-05	2.96946e-05	2.96946e-07
76032	Eau minérale Plancoet, embouteillée, gazeuse ou non gazeuse, faiblement minéralisée (Plancoet, 22)		0	100	0	0	0	0	0	0	0	0	0	0	0	0	3.1	1.4	0.0015	0.45	2.3	0.0018	0.0005	0.00025	0.00025	0.5	0	0	6.16892	0	0	0	0	0	0	0	0	0	0	0	0	0.109195	0.0493137	5.28361e-05	0.0158508	0.0810153	6.34033e-05	1.7612e-05	8.80602e-06
76034	Eau minérale Puits St-Georges, embouteillée, gazeuse, moyennement minéralisée (St-Romain-le-Puy, 42)		0	99.9	0	0	0	0	0	0	0	0	0	0	0	0	43	3.3	0.0015	1.8	4.5	0.025	0.0032	0.00025	0.00025	0.5	0	0	6.16276	0	0	0	0	0	0	0	0	0	0	0	0	0.0520301	0.00399301	1.815e-06	0.00217801	0.00544501	3.02501e-05	3.87201e-06	3.02501e-07
76035	Eau minérale Quézac, embouteillée, gazeuse, moyennement minéralisée (Quézac, 48)		0	99.9	0	0	0	0	0	0	0	0	0	0	0	0	11	6.9	0.0015	3.8	17	0.18	0.0005	0.00025	0.0007	0.5	0	0	6.16276	0	0	0	0	0	0	0	0	0	0	0	0	0.411468	0.258103	5.61093e-05	0.142144	0.635905	0.00673312	1.87031e-05	9.35155e-06
76037	Eau minérale Rozana, embouteillée, gazeuse, fortement minéralisée (Beauregard, 63)		0	99.7	0	0	0	0	0	0	0	0	0	0	0	0	49.3	16	0.0015	5.2	30.1	0.0011	0.0005	0.0011	0.00025	0.5	0	0	6.15042	0	0	0	0	0	0	0	0	0	0	0	0	0.607221	0.19707	1.84753e-05	0.0640477	0.370737	1.35485e-05	6.15843e-06	1.35485e-05
76039	Eau minérale Salvetat, embouteillée, gazeuse, moyennement minéralisée (La Salvetat, 34)		0	99.9	0	0	0	0	0	0	0	0	0	0	0	0	0.7	0.95	0.0015	0.23	21	0.08	0.0005	0.00025	0.00025	0.5	0	0	6.16276	0	0	0	0	0	0	0	0	0	0	0	0	0.0621785	0.0843851	0.00013324	0.0204301	1.86536	0.00710612	4.44132e-05	2.22066e-05
76043	Eau minérale St-Amand, embouteillée, gazeuse ou non gazeuse, moyennement minéralisée (St-Amand, 59)		0	99.9	0	0	0	0	0	0	0	0	0	0	0	0	2.8	4.6	0.0015	0.5	17.6	0.0006	0.0008	0.00025	0.00025	0.5	0	0	6.16276	0	0	0	0	0	0	0	0	0	0	0	0	0.255788	0.420224	0.000137029	0.0456765	1.60781	5.48118e-05	7.30824e-05	2.28382e-05
76044	Eau minérale St-Antonin, embouteillée, non gazeuse, fortement minéralisée (St-Antonin-Noble-Val, 82)		0	99.8	0	0	0	0	0	0	0	0	0	0	0	0	0.79	8.9	0.0015	0.3	56.8	0.0003	0.009	0.00025	0.0008	0.5	0	0	6.15659	0	0	0	0	0	0	0	0	0	0	0	0	0.00237835	0.0267941	4.51585e-06	0.000903171	0.171	9.03171e-07	2.70951e-05	7.52642e-07
76046	Eau minérale St-Diéry, embouteillée, gazeuse, fortement minéralisée (St-Diéry, 63)		0	99.8	0	0	0	0	0	0	0	0	0	0	0	0	7.7	8	0.0015	6.5	8.5	0.019	0.0005	0.00025	0.00025	0.5	0	0	6.15659	0	0	0	0	0	0	0	0	0	0	0	0	0.0101708	0.010567	1.98132e-06	0.00858571	0.0112275	2.50967e-05	6.60439e-07	3.3022e-07
76047	Eau minérale Ste-Marguerite, embouteillée, gazeuse, moyennement minéralisée (St-Maurice, 63)		0	99.9	0	0	0	0	0	0	0	0	0	0	0	0	30.2	4	0.0015	3.3	7.1	5e-05	0.0005	0.0019	0.0012	0.5	0	0	6.16276	0	0	0	0	0	0	0	0	0	0	0	0	0.445527	0.0590102	2.21288e-05	0.0486834	0.104743	7.37627e-07	7.37627e-06	2.80298e-05
76049	Eau minérale St-Yorre, embouteillée, gazeuse, fortement minéralisée (Saint-Yorre, 03)		0	99.5	0	0	0	0	0	0	0	0	0	0	0	0	171	1.1	0.0015	11	9	0.0013	0.0015	0.00025	0.00025	0.5	0	0	6.13808	0	0	0	0	0	0	0	0	0	0	0	0	4.47267	0.0287716	3.9234e-05	0.287716	0.235404	3.40028e-05	3.9234e-05	6.539e-06
76050	Eau minérale Thonon, embouteillée, non gazeuse, faiblement minéralisée (Thonon, 74)		0	100	0	0	0	0	0	0	0	0	0	0	0	0	0.57	1.9	0.0015	0.05	9.2	5e-05	0.0005	0.00025	0.00025	0.5	0	0	6.16892	0	0	0	0	0	0	0	0	0	0	0	0	0.0164687	0.0548956	4.33386e-05	0.00144462	0.26581	1.44462e-06	1.44462e-05	7.22311e-06
76055	Eau minérale Vichy Célestins, embouteillée, gazeuse, fortement minéralisée (Saint-Yorre, 03)		0	99.7	0	0	0	0	0	0	0	0	0	0	0	0	117	1	0.0015	6.6	10.3	0.0014	0.0005	0.00025	0.0008	0.5	0	0	6.15042	0	0	0	0	0	0	0	0	0	0	0	0	0.419758	0.00358767	5.38151e-06	0.0236786	0.036953	5.02274e-06	1.79384e-06	8.96918e-07
76056	Eau minérale Vittel, embouteillée, non gazeuse, moyennement minéralisée (Vittel, 88)		0	99.9	0	0	0	0	0	0	0	0	0	0	0	0	0.52	4.2	0.0015	0.19	24	0.00075	0.0005	0.0012	0.02	5	0	0	6.16276	0	0	0	0	0	0	0	0	0	0	0	0	0.184413	1.48949	0.000531962	0.0673818	8.51139	0.000265981	0.000177321	0.000425569
76057	Eau minérale Volvic, embouteillée, non gazeuse, faiblement minéralisée (Volvic, 63)		0	100	0	0	0	0	0	0	0	0	0	0	0	0	1.2	0.8	0.02	0.6	1.2	0.00075	0.0005	0.0012	0.005	5	0	0	6.16892	0	0	0	0	0	0	0	0	0	0	0	0	0.227518	0.151679	0.00379197	0.113759	0.227518	0.000142199	9.47993e-05	0.000227518
76059	Eau minérale Wattwiller, embouteillée, gazeuse ou non gazeuse, faiblement minéraliséee (Wattwiller, 68)		0	100	0	0	0	0	0	0	0	0	0	0	0	0	0.3	1.1	0.0015	0.11	3.5	0.005	0.0005	0.00025	0.011	0.5	0	0	6.16892	0	0	0	0	0	0	0	0	0	0	0	0	0.0113244	0.0415227	5.66219e-05	0.00415227	0.132118	0.00018874	1.8874e-05	9.43699e-06
76060	Eau minérale Perrier, embouteillée, gazeuse, faiblement minéralisée (Vergèse, 30)		0	100	0	0	0	0	0	0	0	0	0	0	0	0	0.95	0.42	0.0015	0.05	16	0.00075	0.0005	0.0012	0.011	5	0	0	6.16892	0	0	0	0	0	0	0	0	0	0	0	0	0.129426	0.0572199	0.000204357	0.00681189	2.17981	0.000102178	6.81189e-05	0.000163485
76061	Eau minérale Badoit, embouteillée, gazeuse, moyennement minéralisée (St-Galmier, 42)		0	99.9	0	0	0	0	0	0	0	0	0	0	0	0	18	8	0.0015	1.1	15.3	0.00075	0.0005	0.0012	0.005	5	0	0	6.16276	0	0	0	0	0	0	0	0	0	0	0	0	2.08208	0.925369	0.000173507	0.127238	1.76977	8.67534e-05	5.78356e-05	0.000138805
76067	Eau minérale Courmayeur, embouteillée, non gazeuse, fortement minéralisée (Italie)		0	99.8	0	0	0	0	0	0	0	0	0	0	0	0	0.1	6.7	0	0.2	51.7	0.00079	0	0	0	0	0	0	6.15659	0	0	0	0	0	0	0	0	0	0	0	0	0.00489725	0.328116	0	0.0097945	2.53188	3.86883e-05	0	0
76075	Eau minérale San Pellegrino, embouteillée, gazeuse, moyennement minéralisée (Italie)		0	99.9	0	0	0	0	0	0	0	0	0	0	0	0	4.4	5.1	0	0.3	20.8	0.00079	0	0	0	0	0	0	6.16276	0	0	0	0	0	0	0	0	0	0	0	0	0.323637	0.375125	0	0.0220662	1.52992	5.81076e-05	0	0
76078	Eau minérale Valvert, embouteillée, non gazeuse, faiblement minéralisée (Belgique)		0	100	0	0	0	0	0	0	0	0	0	0	0	0	0.2	0.2	0	0.045	6.78	0.00079	0	0	0	0	0	0	6.16892	0	0	0	0	0	0	0	0	0	0	0	0	0.000114627	0.000114627	0	2.5791e-05	0.00388584	4.52775e-07	0	0
76085	Eau minérale La Française, embouteillée, non gazeuse, fortement minéralisée (Propiac, 26)		0	99.7	0	0	0	0	0	0	0	0	0	0	0	0	68	8.3	0.0015	2.2	35.4	0.00079	0.0005	0.00025	0.00025	0.5	0	0	6.15042	0	0	0	0	0	0	0	0	0	0	0	0	0.0471791	0.00575862	1.04071e-06	0.00152638	0.0245609	5.4811e-07	3.46905e-07	1.73452e-07
76086	Eau minérale Montcalm, embouteillée, non gazeuse, très faiblement minéralisée (Auzat, 09)		0	100	0	0	0	0	0	0	0	0	0	0	0	0	0.22	0.07	0.0015	0.06	0.3	0.00079	0.0005	0.00025	0.00025	0.5	0	0	6.16892	0	0	0	0	0	0	0	0	0	0	0	0	0.000574606	0.000182829	3.91777e-06	0.000156711	0.000783553	2.06336e-06	1.30592e-06	6.52961e-07
76089	Eau minérale Ogeu, embouteillée, gazeuse, faiblement minéralisée (Ogeu-les-Bains, 64)		0	100	0	0	0	0	0	0	0	0	0	0	0	0	3.1	1.2	0.0015	0.1	4.8	0.00079	0.0005	0.00025	0.00025	0.5	0	0	6.16892	0	0	0	0	0	0	0	0	0	0	0	0	0.00867088	0.00335647	4.19559e-06	0.000279706	0.0134259	2.20968e-06	1.39853e-06	6.99264e-07
76090	Eau minérale Ogeu, embouteillée, non gazeuse, faiblement minéralisée (Ogeu-les-Bains, 64)		0	100	0	0	0	0	0	0	0	0	0	0	0	0	2.7	1.7	0.0015	0.1	4.9	0.00079	0.0005	0.00025	0.00025	0.5	0	0	6.16892	0	0	0	0	0	0	0	0	0	0	0	0	0.00535656	0.00337265	2.97586e-06	0.000198391	0.00972116	1.56729e-06	9.91955e-07	4.95977e-07
76096	Eau minérale Vals, embouteillée, gazeuse, moyennement minéralisée (Vals-les-Bains, 07)		0	99.9	0	0	0	0	0	0	0	0	0	0	0	0	38.1	1.35	0.0023	3.38	2.22	0.06	0.0005	0.00025	0.0031	0.5	0	0	6.16276	0	0	0	0	0	0	0	0	0	0	0	0	0.184842	0.00654953	1.11585e-05	0.0163981	0.0107703	0.00029109	2.42575e-06	1.21288e-06
76100	Eau minérale Carola, embouteillée, gazeuse ou non gazeuse, moyennement minéralisée (Ribeauville, 68)		0	93.4	0	0	0	0	0	0	0	0	0	0	0	0	13.1	2	0.0015	0.34	7.3	0.00079	0.0005	0.00025	0.00025	0.5	0	0	5.76178	0	0	0	0	0	0	0	0	0	0	0	0	0.0484317	0.00739415	5.54562e-06	0.00125701	0.0269887	2.92069e-06	1.84854e-06	9.24269e-07
76101	Eau minérale Mont-Blanc, embouteillée, non gazeuse, faiblement minéralisée (Italie)		0	89.5	0	0	0	0	0	0	0	0	0	0	0	0	0.16	0.24	0.0015	0.19	2.9	0.00079	0.0005	0.00025	0.00025	0.5	0	0	5.52119	0	0	0	0	0	0	0	0	0	0	0	0	0.00159882	0.00239823	1.4989e-05	0.0018986	0.0289786	7.89418e-06	4.99632e-06	2.49816e-06
76102	Eau minérale Eden (La Goa), embouteillée, non gazeuse, faiblement minéralisée (Suisse)		0	87.9	0	0	0	0	0	0	0	0	0	0	0	0	0.4	0.31	0.0015	0.07	3.45	0.00079	0.0005	0.00025	0.00025	0.5	0	0	5.42248	0	0	0	0	0	0	0	0	0	0	0	0	0.000916607	0.00071037	3.43728e-06	0.000160406	0.00790573	1.8103e-06	1.14576e-06	5.72879e-07
96781	Amidon de riz		352	11.3	9.06	75.9	0.41	69.3	2.5	0.82	0.13	0.084	0.33	0	0.5	0.43	39	25	117	155	17.4	0.51	1.18	0.13	0.76	2.76	2.5	0.311165	0.697088	0.00800897	0.067095	0.000362437	0.0612606	0.00220998	0.000724873	0.000114919	7.42553e-05	0.000291717	0	0.000441996	0.000380116	0.0344757	0.0220998	0.103427	0.137019	0.0153815	0.000450836	0.00104311	0.000114919
																												nrj_kcal	eau_g	proteines_g	glucides_g	sucres_g	amidon_g	fibres_g	lipides_g	ags_g	agmi_g	agpi_g	retinol_mcg	beta_carotene_mcg	vitamine_e_mg	sodium_mg	magnesium_mg	phosphore_mg	potassium_mg	calcium_mg	manganese_mg	fer_mg	cuivre_mg
																											Total (per capita per day)	1967.73	4359.19	77.657	214.444	90.487	101.935	17.5834	74.5488	31.6335	27.8193	8.8649	475.216	3124.28	10.6389	2277.55	288.912	1155.46	3082.05	849.044	3.0005	9.65839	1.32769
[truncated: 59 more columns]

## Sheet: Region 1
alim_simple_code	alim_simple_libelle	nrj_kcal	eau_g	proteines_g	glucides_g	sucres_g	amidon_g	fibres_g	lipides_g	ags_g	agmi_g	agpi_g	retinol_mcg	beta_carotene_mcg	vitamine_e_mg	sodium_mg	magnesium_mg	phosphore_mg	potassium_mg	calcium_mg	manganese_mg	fer_mg	cuivre_mg	zinc_mg	selenium_mcg	iode_mcg	nrj_kcal	eau_g	proteines_g	glucides_g	sucres_g	amidon_g	fibres_g	lipides_g	ags_g	agmi_g	agpi_g	retinol_mcg	beta_carotene_mcg	vitamine_e_mg	sodium_mg	magnesium_mg	phosphore_mg	potassium_mg	calcium_mg	manganese_mg	fer_mg	cuivre_mg	zinc_mg
1000	Pastis	274	59.7	0	2.86	0	0	0	0	0	0	0	0	0	0	0	0	5	2	0	0	0.08	0.03	0.02	0	1	10.3583	2.25691	0	0.10812	0	0	0	0	0	0	0	0	0	0	0	0	0.189021	0.0756083	0	0	0.00302433	0.00113412	0.000756083
1001	Eau de vie	229	67.1	0	0.37	0	0	0	0	0	0	0	0	0	0	1	0	5	1	0.5	0	0.04	0.051	0.019	0	1.1	0.00773929	0.00226771	0	1.25045e-05	0	0	0	0	0	0	0	0	0	0	3.3796e-05	0	0.00016898	3.3796e-05	1.6898e-05	0	1.35184e-06	1.7236e-06	6.42124e-07
1003	Liqueur	328	35.6	0.1	39.6	35.3	0	0	0.3	0.083	0.02	0.12	0	0	0	7.25	3	6	30	1	0.022	0.08	0.03	0.09	0	1	0.237927	0.0258237	7.25386e-05	0.0287253	0.0256061	0	0	0.000217616	6.0207e-05	1.45077e-05	8.70463e-05	0	0	0	0.00525905	0.00217616	0.00435232	0.0217616	0.000725386	1.59585e-05	5.80309e-05	2.17616e-05	6.52847e-05
1004	Rhum	256	63.5	0	0	0	0	0	0	0	0	0	0	0	0	1	0	4.5	2	0	0.018	0.08	0.059	0.043	0	1	0.0828085	0.0205404	0	0	0	0	0	0	0	0	0	0	0	0	0.000323471	0	0.00145562	0.000646941	0	5.82247e-06	2.58776e-05	1.90848e-05	1.39092e-05
1005	Whisky	252	63.9	0	0.096	0.096	0	0	0	0	0	0	0	0	0	0	0	3	1	0	0.008	0.02	0.017	0.014	0	1.25	1.31026	0.332243	0	0.000499145	0.000499145	0	0	0	0	0	0	0	0	0	0	0	0.0155983	0.00519943	0	4.15954e-05	0.000103989	8.83903e-05	7.2792e-05
1006	Vin doux	149	73.1	0.2	10.5	7.78	0	0	0	0	0	0	0	0	0	10.9	9.07	9	83.1	7.46	0.071	0.35	0.053	0.11	0.07	1	4.55398	2.2342	0.00611272	0.320918	0.237785	0	0	0	0	0	0	0	0	0	0.333143	0.277212	0.275073	2.53984	0.228005	0.00217002	0.0106973	0.00161987	0.003362
1007	Apéritif à base de vin ou vermouth	137	75.3	0.054	11.3	11.1	0	0	0	0	0	0	0	0	0	15	7	6.25	48	7.37	0	0.44	0.1	0.035	0	1.2	0.700395	0.384962	0.000276068	0.0577698	0.0567473	0	0	0	0	0	0	0	0	0	0.0766856	0.0357866	0.0319523	0.245394	0.0376782	0	0.00224944	0.000511237	0.000178933
1008	Vodka	242	65.5	0	0	0	0	0	0	0	0	0	0	0	0	1	0	4.75	1.25	0	0.018	0.025	0.0083	0.022	0	1	0.0939183	0.02542	0	0	0	0	0	0	0	0	0	0	0	0	0.000388092	0	0.00184344	0.000485115	0	6.98566e-06	9.7023e-06	3.22117e-06	8.53803e-06
1011	Apéritif anisé sans alcool	5.99	98	0	1	0.03	0	1	0	0	0	0	0	0	0	15	0.33	0	3.9	1.83	0.004	0	0.019	0.03	0	1.2	0	0	0	0	0	0	0	0	0	0	0	0	0	0	0	0	0	0	0	0	0	0	0
1012	Cocktail à base de rhum	180	65	0	22.5	22.3	0	0.3	2.19	1.64	0.082	0.033	0	1	0.02	6	8	7	71	8	0.53	0.21	0.079	0.13	0.76	0.98	4.07798	1.4726	0	0.509747	0.505216	0	0.00679663	0.0496154	0.0371549	0.00185774	0.000747629	0	0.0226554	0.000453109	0.135933	0.181243	0.158588	1.60854	0.181243	0.0120074	0.00475764	0.00178978	0.00294521
1013	Cocktail à base de whisky	166	69.2	0	15.9	15.8	0	0	0.02	0.003	0.001	0.006	0	0	0	47	3	4	4	46	0.007	0.08	0.034	0.04	0.76	0.98	5.86844	2.44636	0	0.562098	0.558563	0	0	0.000707041	0.000106056	3.53521e-05	0.000212112	0	0	0	1.66155	0.106056	0.141408	0.141408	1.62619	0.000247464	0.00282816	0.00120197	0.00141408
1015	Marsala	211	57.7	0.1	27.9	27.9	0	0	0	0	0	0	0	0	0	4	0	12	97	4	0.013	0.4	0.03	0	0	1	0.0375932	0.0102802	1.78167e-05	0.00497085	0.00497085	0	0	0	0	0	0	0	0	0	0.000712667	0	0.002138	0.0172822	0.000712667	2.31617e-06	7.12667e-05	5.345e-06	0
1017	Sangria	85.9	83	0	10.3	9.5	0.21	0	0.05	0	0.013	0.027	0	54	0.14	3	10.7	12.6	123	9.35	0.19	0.37	0.056	0.07	0.25	0.91	0.164929	3.13775	0	0.0197762	0.0182402	0.000403203	0	9.60008e-05	0	2.49602e-05	5.18404e-05	0	0.103681	0.000268802	0.00576005	0.0205442	0.0241922	0.236162	0.0179522	0.000364803	0.000710406	0.000107521	0.000134401
1018	Kir (au vin blanc)	91	83.5	0.18	7.36	5.55	0	0	0	0	0	0	0	8.7	0.14	1.56	5.09	18	108	6.88	0.08	0.67	0.0027	0.082	1.1	0.96	0.926776	3.15665	0.00183318	0.0749568	0.0565231	0	0	0	0	0	0	0	0.0886038	0.00142581	0.0158876	0.0518383	0.183318	1.09991	0.0700683	0.000814748	0.00682351	2.74977e-05	0.000835116
1019	Kir royal (au champagne)	96.6	82.5	0.25	7.97	5.66	0	0	0	0	0	0	0	8.7	0.14	1.56	5.09	11	91.4	6.88	0.08	0.56	0.0027	0.082	1.1	0.78	0.078016	3.11884	0.000201905	0.00643672	0.00457112	0	0	0	0	0	0	0	0.00702628	0.000113067	0.00125989	0.00411078	0.00888381	0.0738163	0.00555642	6.46095e-05	0.000452266	2.18057e-06	6.62247e-05
1021	Crème de cassis	245	47.1	0	41	40.9	0	0	0	0	0	0	0	48.1	0.52	0	8.44	18.5	128	16.6	0.11	0.62	0.097	0.12	0.57	0.87	0	1.78058	0	0	0	0	0	0	0	0	0	0	0	0	0	0	0	0	0	0	0	0	0
1022	Cocktail type punch, 16% alcool	162	69.4	0.6	17.8	17.8	0	0.25	0.3	0.00012	0.00012	0.00012	0	52.9	0.04	16.7	3.1	13	43	13	0.09	0.06	0.01	0.26	25	10	1.41881	2.62361	0.00525486	0.155894	0.155894	0	0.00218952	0.00262743	1.05097e-06	1.05097e-06	1.05097e-06	0	0.463303	0.000350324	0.14626	0.0271501	0.113855	0.376598	0.113855	0.000788229	0.000525486	8.7581e-05	0.0022771
1023	Eau de vie de vin, type armagnac, cognac	228	68	0	1	0	0	0	0	0	0	0	0	0	0	1	0	5	2	0.25	0.013	0.08	0.16	0.016	0	1	0.0322367	2.57068	0	0.000141389	0	0	0	0	0	0	0	0	0	0	0.000141389	0	0.000706945	0.000282778	3.53473e-05	1.83806e-06	1.13111e-05	2.26222e-05	2.26222e-06
1026	Saké ou Alcool de riz	133	78.4	0	5	0	0	0	0	0	0	0	0	0	0	2	6	6	25	5	0.013	0.1	0.009	0.02	0	1	0	2.96385	0	0	0	0	0	0	0	0	0	0	0	0	0	0	0	0	0	0	0	0	0
2000	Jus d'ananas, à base de concentré	52.3	87.1	0.41	11.9	11.9	0	0.18	0.096	0.044	0.0081	0.025	0	3	0.02	4.62	17	9.12	144	14.3	1.46	0.15	0.03	0.066	5	1	0.105814	3.29274	0.000829514	0.0240761	0.0240761	0	0.000364177	0.000194228	8.9021e-05	1.63879e-05	5.05801e-05	0	0.00606961	4.04641e-05	0.0093472	0.0343945	0.0184516	0.291341	0.0289318	0.00295388	0.000303481	6.06961e-05	0.000133531
2006	Jus de carotte, pur jus	38.2	88.9	0.4	6.55	5.95	0	0.33	0.1	0.037	0.0025	0.041	0	9300	1.16	42.5	8.75	25.6	210	13.6	0.071	0.46	0.051	0.086	1.1	2	0.105133	3.36079	0.00110087	0.0180267	0.0163754	0	0.000908216	0.000275217	0.00010183	6.88042e-06	0.000112839	0	25.5952	0.00319252	0.116967	0.0240815	0.0704555	0.577955	0.0374295	0.000195404	0.001266	0.000140361	0.000236686
2007	Jus de citron, maison	28.8	91.5	0.49	2.41	2.06	0	0.3	0.24	0.04	0.006	0.021	0	1	0.095	2.62	5.99	14.5	132	12.4	0.008	0.24	0.042	0.049	1.1	0.6	0.385392	3.45908	0.00655702	0.0322498	0.0275663	0	0.0040145	0.0032116	0.000535267	8.02901e-05	0.000281015	0	0.0133817	0.00127126	0.03506	0.0801562	0.194034	1.76638	0.165933	0.000107053	0.0032116	0.00056203	0.000655702
2008	Cocktail sans alcool (à base de jus de fruits et de sirop)	53.2	86.4	0.5	12.8	11.2	0	0	0	0	0	0	0	75	1	2	8.31	10.9	132	12.8	0.035	0.1	0.043	0.034	0.36	5.43	0.041713	3.26628	0.00039204	0.0100362	0.00878169	0	0	0	0	0	0	0	0.058806	0.00078408	0.00156816	0.0065157	0.00854647	0.103499	0.0100362	2.74428e-05	7.8408e-05	3.37154e-05	2.66587e-05
2012	Jus d'orange, à base de concentré	45.6	89.7	0.63	9.59	9.59	0	0.25	0.13	0.034	0.03	0.035	0	10.6	0.15	3.44	10.9	16.9	154	7.25	0.02	0.08	0.023	0.022	5	0.4	3.19705	3.39103	0.0441697	0.672361	0.672361	0	0.0175277	0.00911438	0.00238376	0.00210332	0.00245387	0	0.743173	0.0105166	0.241181	0.764206	1.18487	10.797	0.508302	0.00140221	0.00560885	0.00161255	0.00154243
2013	Jus d'orange, maison	45	88.3	0.7	9.4	8.4	0	0.2	0.2	0.024	0.036	0.04	0	33	0.04	0.56	13.2	17	200	10.5	0.022	0.079	0.025	0.027	5	1	2.74358	3.33811	0.0426779	0.573103	0.512135	0	0.0121937	0.0121937	0.00146324	0.00219486	0.00243874	0	2.01196	0.00243874	0.0341423	0.804783	1.03646	12.1937	0.640169	0.00134131	0.00481651	0.00152421	0.00164615
2014	Jus de pomme, à base de concentré	48.5	88.5	0.24	11.3	10.8	0	0.3	0.098	0.033	0.006	0.053	0	4.23	0.01	3.98	7.07	6	128	6.45	0.026	0.085	0.011	0.01	5	0.7	1.13206	3.34567	0.00560196	0.263759	0.252088	0	0.00700245	0.00228747	0.000770269	0.000140049	0.0012371	0	0.0987345	0.000233415	0.0928992	0.165024	0.140049	2.98771	0.150553	0.000606879	0.00198403	0.000256756	0.000233415
2015	Jus de pamplemousse (pomélo), à base de concentré	40.9	89.9	0.52	8.41	8.41	0	0.21	0.1	0.055	0.0085	0.016	0	3	0.04	3.97	7.91	12.5	115	10.6	0.016	0.15	0.031	0.037	1.1	0.6	1.29335	3.39859	0.0164435	0.265942	0.265942	0	0.00664065	0.00316222	0.00173922	0.000268788	0.000505955	0	0.0948665	0.00126489	0.12554	0.250131	0.395277	3.63655	0.335195	0.000505955	0.00474332	0.000980287	0.00117002
2016	Jus de raisin, pur jus	69.2	82.4	0.25	16.3	16	0	0.14	0.057	0.031	0.003	0.022	0	5	0.4	3.81	8.35	12.5	114	8.29	0.089	0.47	0.031	0.056	5	0.5	0.043684	3.11506	0.000157818	0.0102897	0.0101004	0	8.83781e-05	3.59825e-05	1.95694e-05	1.89382e-06	1.3888e-05	0	0.00315636	0.000252509	0.00240515	0.00527112	0.0078909	0.071965	0.00523325	5.61832e-05	0.000296698	1.95694e-05	3.53512e-05
2017	Jus de grenade, pur jus	55.4	86	0.15	13	12.7	0	0.1	0.29	0.077	0.059	0.05	0	0	0.38	9	7	11	214	11	0.095	0.1	0.021	0.09	3.05	1	0.187137	3.25116	0.000506688	0.043913	0.0428996	0	0.000337792	0.000979597	0.0002601	0.000199297	0.000168896	0	0	0.00128361	0.0304013	0.0236454	0.0371571	0.722875	0.0371571	0.000320902	0.000337792	7.09363e-05	0.000304013
2018	Jus de pruneau	77.5	81.2	0.37	18.7	13.5	0	0.45	0.039	0.003	0.021	0.007	0	2	0.12	10	14	25	276	12	0.15	1.18	0.068	0.21	3.05	1	0.000253828	3.0697	1.21182e-06	6.12463e-05	4.42152e-05	0	1.47384e-06	1.27733e-07	9.82561e-09	6.87792e-08	2.29264e-08	0	6.5504e-06	3.93024e-07	3.2752e-05	4.58528e-05	8.188e-05	0.000903956	3.93024e-05	4.9128e-07	3.86474e-06	2.22714e-07	6.87792e-07
2019	Jus de raisin, à base de concentré	68.8	84.2	0.31	16	16	0	0.15	0.11	0.055	0.0083	0.024	0	2.5	0.67	2.83	7.8	17	62	16	0.06	0.43	0.005	0.025	10	10	0.406372	3.18311	0.00183104	0.0945052	0.0945052	0	0.000885986	0.000649723	0.000324862	4.90246e-05	0.000141758	0	0.0147664	0.00395741	0.0167156	0.0460713	0.100412	0.366208	0.0945052	0.000354395	0.00253983	2.95329e-05	0.000147664
2023	Jus de mangue, frais	51.1	86	0.19	9.5	9.3	0.2	0	0	0	0	0	0	375	1.05	3.98	14.3	12.5	134	10.6	0.02	0.15	0.02	0.02	0.1	3	0.360996	3.25116	0.00134225	0.0671127	0.0656998	0.0014129	0	0	0	0	0	0	2.64918	0.00741772	0.0281167	0.101022	0.0883062	0.946642	0.0748836	0.00014129	0.00105967	0.00014129	0.00014129
2025	Jus de pamplemousse (pomélo), maison	43.6	90	0.5	9.1	9.1	0	0.1	0.1	0.014	0.013	0.024	0	4	0.22	1	12	15	162	9	0.02	0.2	0.033	0.05	3.05	0.6	0.244552	3.40237	0.00280449	0.0510418	0.0510418	0	0.000560899	0.000560899	7.85258e-05	7.29168e-05	0.000134616	0	0.022436	0.00123398	0.00560899	0.0673079	0.0841348	0.908656	0.0504809	0.00011218	0.0011218	0.000185097	0.000280449
2027	Jus de pamplemousse (pomelo), pur jus	42.5	89.9	0.49	8.89	8.89	0	0.15	0.083	0.044	0.0055	0.017	0	217	0.19	3.05	8.63	15	128	4.83	0.05	0.15	0.05	0.05	3.05	1	0.304866	3.39859	0.00351493	0.0637709	0.0637709	0	0.001076	0.000595386	0.000315626	3.94533e-05	0.000121947	0	1.55661	0.00136293	0.0218786	0.0619058	0.1076	0.918186	0.0346472	0.000358666	0.001076	0.000358666	0.000358666
2028	Jus de citron, pur jus	29.4	92.5	0.4	6.1	2.4	0	0.4	0.29	0.038	0.011	0.085	0	2	0.15	21	8	9	102	11	0.02	0.13	0.037	0.06	3.05	1	0.233841	3.49688	0.00318151	0.0485181	0.0190891	0	0.00318151	0.0023066	0.000302244	8.74916e-05	0.000676071	0	0.0159076	0.00119307	0.167029	0.0636302	0.071584	0.811285	0.0874916	0.000159076	0.00103399	0.00029429	0.000477227
2030	Jus de citron vert, maison	28.8	90.8	0.42	1.69	1.69	0	0.4	0.07	0.008	0.008	0.023	0	30	0.22	2	8	14	117	14	0.018	0.09	0.027	0.08	3.05	1	0.00258461	3.43262	3.76923e-05	0.000151666	0.000151666	0	3.58974e-05	6.28204e-06	7.17948e-07	7.17948e-07	2.0641e-06	0	0.0026923	1.97436e-05	0.000179487	0.000717948	0.00125641	0.0105	0.00125641	1.61538e-06	8.07691e-06	2.42307e-06	7.17948e-06
2031	Jus de citron vert, pur jus	23.9	92.5	0.25	1.24	1.24	0	0.45	0.23	0.026	0.022	0.064	0	10	0.12	10.5	7	10	75	12	0.008	0.23	0.03	0.06	3.05	1.2	0.00215793	3.49688	2.25725e-05	0.00011196	0.00011196	0	4.06306e-05	2.07667e-05	2.34754e-06	1.98638e-06	5.77857e-06	0	0.000902902	1.08348e-05	0.000948047	0.000632031	0.000902902	0.00677176	0.00108348	7.22321e-07	2.07667e-05	2.7087e-06	5.41741e-06
2034	Jus de clémentine ou mandarine, pur jus	46.9	88	0.66	10.6	10	0	0.15	0.14	0.043	0.03	0.035	0	30	0.09	3.79	9.3	16	123	2.8	0.05	0.3	0.05	0.05	0.5	1	0.249596	3.32677	0.00351244	0.0564119	0.0532187	0	0.000798281	0.000745062	0.000228841	0.000159656	0.000186266	0	0.159656	0.000478969	0.0201699	0.0494934	0.08515	0.65459	0.0149012	0.000266094	0.00159656	0.000266094	0.000266094
2035	Jus multifruit, pur jus, standard	48.9	87.3	0.25	11.2	10.1	0.15	0.25	0.15	0.005	0.005	0.005	0	84.9	0.2	0.92	7	10	140	5.4	0.09	0.08	0.03	0.025	10	10	0.928516	3.3003	0.00474702	0.212666	0.191779	0.00284821	0.00474702	0.00284821	9.49403e-05	9.49403e-05	9.49403e-05	0	1.61209	0.00379761	0.017469	0.132916	0.189881	2.65833	0.102536	0.00170893	0.00151905	0.000569642	0.000474702
2043	Nectar d'abricot	58.5	84.9	0.21	13.7	11	0	0.08	0.03	0.005	0.013	0.0059	0	786	0.31	1.68	5.28	9	114	11.5	0.022	0.38	0.039	0.05	1.1	0.2	1.81348	3.20957	0.00650992	0.424694	0.340996	0	0.00247997	0.000929988	0.000154998	0.000402995	0.000182898	0	24.3657	0.00960988	0.0520793	0.163678	0.278996	3.53395	0.356495	0.000681991	0.0117798	0.00120898	0.00154998
2053	Jus de tomate, pur jus (aliment moyen)	21.7	94.1	0.88	3.72	3.72	0	0.4	0.14	0.035	0.011	0.033	0	144	0.35	175	13.1	21.8	283	6.54	0.07	0.31	0.061	0.14	0.7	0.3	0.0134183	3.55737	0.000544153	0.00230028	0.00230028	0	0.000247342	8.65697e-05	2.16424e-05	6.80191e-06	2.04057e-05	0	0.0890432	0.000216424	0.108212	0.00810045	0.0134801	0.174995	0.00404404	4.32849e-05	0.00019169	3.77197e-05	8.65697e-05
2054	Nectar de poire	62.4	84	0.19	14.8	11.4	0	0.45	0.043	0.001	0.003	0.003	0	1	0.05	1.3	3	3	13	5	0.03	0.26	0.067	0.07	1.1	0.7	0	3.17555	0	0	0	0	0	0	0	0	0	0	0	0	0	0	0	0	0	0	0	0	0
2055	Citron, boisson à base de jus concentré, diluée	2.04	99.5	0.027	0.38	0.15	0	0.027	0.02	0.0023	0.00071	0.0052	0	0.15	0.0094	3.52	1.48	0.66	8.2	7.4	0.0022	0.037	0.018	0.017	0.75	0.16	0.0418009	3.76151	0.000553248	0.00778645	0.0030736	0	0.000553248	0.000409813	4.71285e-05	1.45484e-05	0.000106551	0	0.0030736	0.000192612	0.0721271	0.0303262	0.0135238	0.168023	0.151631	4.50794e-05	0.000758154	0.000368832	0.000348341
2061	Nectar multifruit, standard	49.7	87.2	0.3	11.5	11	0	0.3	0.089	0.013	0	0	120	26.1	0.97	3.43	5.35	6.17	87.4	9.17	0.05	0	0.05	0	0.3	10	0.575716	3.29652	0.00347515	0.133214	0.127422	0	0.00347515	0.00103096	0.00015059	0	0	1.39006	0.302338	0.0112363	0.0397325	0.0619735	0.0714722	1.01243	0.106224	0.000579191	0	0.000579191	0
2069	Jus multifruit, à base de concentré, standard	49.5	87.8	0.52	11.2	10.8	0	0.62	0.15	0.021	0	0	0	449	0.53	8.57	8.2	12.1	148	11.1	0.2	0.1	0.05	0.05	0.5	10	1.91601	3.3192	0.0201277	0.433521	0.418038	0	0.0239985	0.00580608	0.000812851	0	0	0	17.3795	0.0205148	0.331721	0.317399	0.468357	5.72867	0.42965	0.00774144	0.00387072	0.00193536	0.00193536
2070	Jus d'orange, pur jus	45.4	88.2	0.61	9.61	9.61	0	0.28	0.11	0.053	0.014	0.019	0	26.2	0.2	4.81	10	16.5	165	0.41	0.021	0.068	0.022	0.045	3.05	0.7	14.1433	3.33433	0.190032	2.99378	2.99378	0	0.0872277	0.034268	0.016511	0.00436138	0.00591902	0	8.16202	0.0623055	1.49845	3.11527	5.1402	51.402	0.127726	0.00654208	0.0211839	0.0068536	0.0140187
2073	Jus d'ananas, pur jus	52.9	86.3	0.41	12.1	12.1	0	0.22	0.074	0.031	0.01	0.03	0	7	0.02	5.2	13.6	9.8	134	8.08	1.2	0.18	0.04	0.073	1.1	1	1.44577	3.2625	0.0112054	0.330697	0.330697	0	0.00601267	0.00202244	0.00084724	0.000273303	0.00081991	0	0.191312	0.000546606	0.142118	0.371692	0.267837	3.66226	0.220829	0.0327964	0.00491946	0.00109321	0.00199511
2074	Jus de pomme, pur jus	48.9	88.4	0.17	11.4	10.9	0	0.23	0.14	0.046	0.006	0.039	0	7	0.01	13.3	4.56	6.59	113	4.32	0.05	0.3	0.05	0.05	0.1	1	2.85714	3.34189	0.0099328	0.666082	0.636868	0	0.0134385	0.00817996	0.0026877	0.00035057	0.0022787	0	0.408998	0.000584283	0.777096	0.266433	0.385042	6.60239	0.25241	0.00292141	0.0175285	0.00292141	0.00292141
2365	Nectar de fruit de la passion ou maracuja	68	85.5	0.3	15.2	13	0	0	0.1	0	0	0	0	100	0	3	3.8	5.1	72.8	1.7	0.03	0.14	0.02	0.02	0.1	1.1	0.101679	3.23226	0.000448583	0.0227282	0.0194386	0	0	0.000149528	0	0	0	0	0.149528	0	0.00448583	0.00568206	0.00762592	0.108856	0.00254197	4.48583e-05	0.000209339	2.99056e-05	2.99056e-05
2367	Nectar de goyave	47.8	88	0.14	11.3	9.97	0	0.14	0.16	0.005	0	0	0	166	0.27	2.02	2.6	4.5	61	7.8	0.03	0.07	0.02	0.025	10	10	0	3.32677	0	0	0	0	0	0	0	0	0	0	0	0	0	0	0	0	0	0	0	0	0
2370	Nectar de mangue	51.3	87	0.2	12.3	11.6	0	0.15	0.083	0.058	0.0029	0.0029	0	784	0.27	4.59	3.7	3.8	39	8.1	0.03	0.08	0.02	0.025	10	10	0.0977264	3.28896	0.000381	0.0234315	0.022098	0	0.00028575	0.000158115	0.00011049	5.5245e-06	5.5245e-06	0	1.49352	0.00051435	0.00874394	0.00704849	0.00723899	0.0742949	0.0154305	5.715e-05	0.0001524	3.81e-05	4.7625e-05
2371	Nectar de pêche	55	85.6	0.22	12.1	11.9	0	0.33	0.05	0.002	0.008	0.011	0	128	0.29	4.37	4	6	40	5	0.019	0.19	0.069	0.08	1.1	5.55	0	3.23604	0	0	0	0	0	0	0	0	0	0	0	0	0	0	0	0	0	0	0	0	0
2375	Nectar d'orange	39.8	89.7	0.29	8.79	8.79	0	0.18	0.08	0.005	0.0028	0.0028	0	5	0.27	6.51	5.96	7.7	82.8	7.69	0.022	0.14	0.023	0.041	1.1	1.1	0.247379	3.39103	0.00180251	0.0546348	0.0546348	0	0.0011188	0.000497245	3.10778e-05	1.74036e-05	1.74036e-05	0	0.0310778	0.0016782	0.0404633	0.0370447	0.0478598	0.514648	0.0477977	0.000136742	0.000870178	0.000142958	0.000254838
2500	Smoothie	59.8	84.2	0.62	12.4	11.7	0.18	1.08	0.26	0.17	0	0	0	238	0	3.84	11.5	15.5	165	9.65	0.27	0.24	0.045	0.07	10	10	0.753267	3.18311	0.00780979	0.156196	0.147378	0.00226736	0.0136041	0.00327507	0.00214139	0	0	0	2.99795	0	0.0483703	0.144859	0.195245	2.07841	0.121556	0.00340104	0.00302314	0.00056684	0.00088175
4002	Pomme de terre, sans peau, cuite au four	91.9	75.4	1.96	20.1	1.7	13.5	1.5	0.1	0.026	0.002	0.043	0	0	0.04	1.43	21.7	50	391	9.48	0.15	0.35	0.094	0.24	1.1	3	2.78456	2.85043	0.0593878	0.609028	0.0515098	0.409049	0.0454498	0.00302999	0.000787797	6.05998e-05	0.0013029	0	0	0.001212	0.0433289	0.657508	1.51499	11.8473	0.287243	0.00454498	0.010605	0.00284819	0.00727198
4003	Pomme de terre, bouillie/cuite à l'eau	80.5	78.3	1.8	16.7	0.86	15.8	1.8	0.34	0.094	0.002	0.043	0	2	0.01	20.6	17.3	37.2	363	5.83	0.074	0.27	0.076	0.15	5	2.5	8.8085	2.96007	0.19696	1.82735	0.0941032	1.72887	0.19696	0.0372036	0.0102857	0.000218845	0.00470516	0	0.218845	0.00109422	2.2541	1.89301	4.07051	39.7203	0.637932	0.00809726	0.029544	0.0083161	0.0164134
4015	Pomme de terre, sautée/poêlée	137	69.9	2.5	17.3	2.2	14	2.6	5.7	1.16	3.58	0.66	0	10.2	0.37	204	28	46	680	18	0.17	0.73	0.15	0.35	10	10	7.08118	2.64251	0.129219	0.894193	0.113712	0.723625	0.134387	0.294619	0.0599575	0.185041	0.0341137	0	0.527212	0.0191244	10.5442	1.44725	2.37762	35.1475	0.930375	0.00878687	0.0377319	0.00775312	0.0180906
4016	Pomme de terre, flocons déshydratés, au lait ou à la crème	348	12.7	0	86.3	1.3	64.9	0.55	0.2	0.039	0.0095	0.11	0	0.5	0	3.75	6	35.6	33.5	27.5	0.1	0.84	0.1	0.16	0.4	0.48	0.179455	0.480113	0	0.0445028	0.000670378	0.0334673	0.000283621	0.000103135	2.01113e-05	4.89892e-06	5.67243e-05	0	0.000257838	0	0.00193378	0.00309405	0.018358	0.0172751	0.0141811	5.15675e-05	0.000433167	5.15675e-05	8.25081e-05
4022	Pomme de terre, flocons déshydratés, nature	348	12.7	0	86.3	1.3	64.9	0.55	0.2	0.039	0.0095	0.11	0	0.5	0	3.75	6	35.6	33.5	27.5	0.1	0.84	0.1	0.16	0.4	0.48	4.93552	0.480113	0	1.22395	0.0184373	0.920446	0.00780039	0.0028365	0.000553118	0.000134734	0.00156008	0	0.00709126	0	0.0531845	0.0850951	0.504898	0.475115	0.390019	0.00141825	0.0119133	0.00141825	0.0022692
4025	Potatoes ou Wedges ou Quartiers de pommes de terre épicés, surgelées, cuites	174	59.9	3.25	25.3	0	22.6	3.4	5.8	0.64	2.13	2.69	10.5	18	1.39	302	24	84	550	17	0.13	0.7	0.13	0.43	10	10	1.04843	2.26447	0.0195827	0.152444	0	0.136175	0.0204865	0.0349476	0.00385629	0.0128342	0.0162085	0.0632672	0.108458	0.00837537	1.81969	0.144611	0.506138	3.314	0.102433	0.000783308	0.00421781	0.000783308	0.00259094
4026	Pomme de terre, rôtie/cuite au four	89.4	74.9	2.5	18.5	1.18	17.3	2.2	0.13	0.035	0.003	0.058	0	6	0.04	10	28	70	535	15	0.22	1.08	0.12	0.36	5	3	1.34674	2.83153	0.0376605	0.278688	0.0177758	0.260611	0.0331412	0.00195835	0.000527247	4.51926e-05	0.000873724	0	0.0903852	0.000602568	0.150642	0.421798	1.05449	8.05935	0.225963	0.00331412	0.0162693	0.0018077	0.00542311
4027	Pomme de terre rissolée, surgelée, cuite	137	69.9	2.5	17.3	2.2	14	2.6	5.7	1.16	3.58	0.66	0	10.2	0.37	204	28	46	680	18	0.17	0.73	0.15	0.35	10	10	0.618625	2.64251	0.0112888	0.0781183	0.00993412	0.0632171	0.0117403	0.0257384	0.00523799	0.0161655	0.00298024	0	0.0460582	0.00167074	0.921164	0.126434	0.207713	3.07055	0.0812791	0.000767636	0.00329632	0.000677326	0.00158043
4028	Pomme de terre de conservation, sans peau, bouillie/cuite à l'eau	76.1	79.7	1.81	15.7	0.1	13.5	1.9	0.25	0.066	0.0054	0.11	0	2.5	0.1	2.5	17	40	390	6.5	0.1	0.31	0.07	0.23	10	10	7.68519	3.01299	0.182788	1.58551	0.0100988	1.36334	0.191877	0.025247	0.00666521	0.000545336	0.0111087	0	0.25247	0.0100988	0.25247	1.7168	4.03952	39.3854	0.656423	0.0100988	0.0313063	0.00706917	0.0232273
4030	Frites de pommes de terre, surgelées, rôties/cuites au four	213	51.1	3.75	32.6	0.29	30.6	4.2	6.6	0.75	2.24	3.32	10.5	2.5	7.64	156	29	81	590	11	0.15	0.67	0.11	0.45	10	10	6.01273	1.93179	0.105858	0.920259	0.00818635	0.863801	0.118561	0.18631	0.0211716	0.0632325	0.0937196	0.296402	0.070572	0.215668	4.40369	0.818635	2.28653	16.655	0.310517	0.00423432	0.0189133	0.00310517	0.012703
4032	Frites de pommes de terre, surgelées, cuites en friteuse	285	42.5	3.28	39.4	0.69	32.1	3.9	11.9	2.94	5.85	2.54	1	0	0.44	29	23.3	106	684	23.8	0.16	0.9	0.12	0.36	1.1	2.5	20.9575	1.60668	0.241195	2.89728	0.0507392	2.36047	0.286787	0.875067	0.216193	0.43018	0.186779	0.073535	0	0.0323554	2.13252	1.71337	7.79471	50.298	1.75013	0.0117656	0.0661815	0.0088242	0.0264726
4047	Pomme de terre, purée (aliment moyen)	91.8	78.7	2.11	12.7	1.49	10.6	1.58	3.25	1.71	0.86	0.3	24.4	13.1	0.17	140	15.5	51.7	238	35.4	0.086	0.26	0.049	0.24	3.51	5.05	8.4285	2.97519	0.193727	1.16603	0.136802	0.973225	0.145066	0.298394	0.157001	0.0789598	0.0275441	2.24025	1.20276	0.0156083	12.8539	1.42311	4.74677	21.8517	3.2502	0.00789598	0.0238716	0.00449887	0.0220353
4090	Fécule de pomme de terre	348	12.7	0	86.3	1.3	64.9	0.55	0.2	0.039	0.0095	0.11	0	0.5	0	3.75	6	35.6	33.5	27.5	0.1	0.84	0.1	0.16	0.4	0.48	0.680988	0.480113	0	0.168877	0.00254392	0.127	0.00107627	0.000391373	7.63177e-05	1.85902e-05	0.000215255	0	0.000978432	0	0.00733824	0.0117412	0.0696643	0.0655549	0.0538137	0.000195686	0.00164377	0.000195686	0.000313098
4102	Patate douce, cuite	62.8	78	1.69	12.2	6.11	6.14	2.9	0.15	0.042	0.002	0.077	0	10500	0.83	31.5	22.5	43	353	32.5	0.38	0.71	0.13	0.26	5	3	0	2.94872	0	0	0	0	0	0	0	0	0	0	0	0	0	0	0	0	0	0	0	0	0
5000	Bière brune	40.5	92.7	0.43	4.1	4.1	0	0	0	0	0	0	0	0	0	11.6	9.55	14	45	6.91	0	0.02	0.07	0.17	0	4.1	0	3.50445	0	0	0	0	0	0	0	0	0	0	0	0	0	0	0	0	0	0	0	0	0
5001	Bière ""coeur de marché"" (4-5° alcool)	37.1	92.7	0.39	2.7	0.98	0	0	0	0	0	0	0	0	0	1.88	7.2	11.5	36.6	6.05	0.0057	0.01	0.003	0	1.1	4.1	3.18467	3.50445	0.0334777	0.231768	0.0841233	0	0	0	0	0	0	0	0	0	0.161379	0.618049	0.987161	3.14175	0.519333	0.000489289	0.000858401	0.00025752	0
5002	Bière forte (>8° alcool)	62.7	88.8	0.63	4.6	1.77	0	0	0	0	0	0	0	0	0	6.8	9	18.4	64.2	4.3	0.018	0.02	0.009	0.013	0.11	1.5	0.826232	3.35701	0.00830185	0.0606167	0.0233242	0	0	0	0	0	0	0	0	0	0.0896073	0.118598	0.242467	0.845998	0.0566634	0.000237196	0.000263551	0.000118598	0.000171308
5004	Panaché (limonade et bière)	36.2	92.3	0	5.63	5.4	0	0	0	0	0	0	0	0	0	2.07	0.36	9.95	18.9	0.38	0.0004	0.058	0.00095	0.0082	1.1	0.87	0.096312	3.48932	0	0.0149789	0.014367	0	0	0	0	0	0	0	0	0	0.00550734	0.000957799	0.0264725	0.0502844	0.00101101	1.06422e-06	0.000154312	2.52752e-06	2.18165e-05
5005	Panaché préemballé (<1° alc.)	25.4	94	0.48	4.93	4.92	0	0	0.025	0	0	0	0	0	0	1.37	3.07	9.9	7.47	3.42	0.008	0.006	0.001	0	1.1	1	0.0481235	3.55359	0.000909421	0.00934051	0.00932156	0	0	4.73657e-05	0	0	0	0	0	0	0.00259564	0.0058165	0.0187568	0.0141529	0.00647962	1.5157e-05	1.13678e-05	1.89463e-06	0
[truncated: 1,025 more rows]
[truncated: 9 more columns]

## Sheet: Region 2
alim_simple_code	alim_simple_libelle	nrj_kcal	eau_g	proteines_g	glucides_g	sucres_g	amidon_g	fibres_g	lipides_g	ags_g	agmi_g	agpi_g	retinol_mcg	beta_carotene_mcg	vitamine_e_mg	sodium_mg	magnesium_mg	phosphore_mg	potassium_mg	calcium_mg	manganese_mg	fer_mg	cuivre_mg	zinc_mg	selenium_mcg	iode_mcg	nrj_kcal	eau_g	proteines_g	glucides_g	sucres_g	amidon_g	fibres_g	lipides_g	ags_g	agmi_g	agpi_g	retinol_mcg	beta_carotene_mcg	vitamine_e_mg	sodium_mg	magnesium_mg	phosphore_mg	potassium_mg	calcium_mg	manganese_mg	fer_mg	cuivre_mg	zinc_mg
[truncated: 1,098 more rows]
[truncated: 9 more columns]

[truncated: 10 more sheets: Region 3, Region 4, Region 5, Region 6, Region 7, Region 8, Region 9, Region 10, Region 11, Region 12]
