# Supplementary material
Source: Research Square preprint supplement (doi:10.21203/rs.3.rs-10301703/v1)
Supplement: Supplementary file 5 [file 58e921ee47fb92793d17faa9.xlsx]

## Sheet: Metadata
	unit	data source	definition
Surface	ha	RPG
Yield	qt/ha	Agreste
Production	tonne

## Sheet: Overall
SAR_ID	DEP_ID	DEP_Name	nom	CropName	Surface	Yield	Production
77062	77	Seine-et-Marne	Brie Humide	Citrus	0.02	280.5	0.561
77320	77	Seine-et-Marne	Bassee et Basse-Yonne	Garlic	8.24	56.5	46.556
78332	78	Yvelines	Vallee de la Seine	Garlic	0.09	70.5	0.6345			France
77338	77	Seine-et-Marne	Gatinais Pauvre	Condiment	10	61	61		Alfalfa	3.23918e+06
77339	77	Seine-et-Marne	Gatinais Riche	Condiment	16.08	61	98.088		Aroma	7306.54
77339	77	Seine-et-Marne	Gatinais Riche	Condiment	0.2	61	1.22		Aromatic	14326.5
77058	77	Seine-et-Marne	Brie Centrale	Artichoke	0.16	56.5	0.904		Artichoke	16305.1
77062	77	Seine-et-Marne	Brie Humide	Artichoke	0.73	56.5	4.1245		Avocado	394.562
77057	77	Seine-et-Marne	Brie Boisee	Eggplant	0.2	434.17	8.6834		Barley	1.19967e+07
77335	77	Seine-et-Marne	Brie Champennoise	Eggplant	0.07	434.17	3.03919		Buckwheat	274011
27330	27	Eure	Vexin	Oat	9.71	51	49.521		Butternot	109224
28334	28	Eure-et-Loir	Drouais	Oat	2.5	51	12.75		Cabbage	256179
45339	45	Loiret	Gatinais Riche	Oat	1.05	42	4.41		Carob	6.94572
77056	77	Seine-et-Marne	Orxois	Oat	3.69	59	21.771		Carrot	589215
77057	77	Seine-et-Marne	Brie Boisee	Oat	57.77	59	340.843		Celery	38534.7
77058	77	Seine-et-Marne	Brie Centrale	Oat	28.9	59	170.51		CerealMix	678670
77059	77	Seine-et-Marne	Montois	Oat	30.27	59	178.593		Cherry	5162.25
77060	77	Seine-et-Marne	Brie Est	Oat	26	59	153.4		Chestnut	10015.6
77061	77	Seine-et-Marne	Vallees de la Marne et du Morin	Oat	42.25	59	249.275		ChickPea	21125.4
77062	77	Seine-et-Marne	Brie Humide	Oat	48.7	59	287.33		Citrus	65113.7
77064	77	Seine-et-Marne	Pays de Biere et Foret de Fontaine	Oat	13.46	59	79.414		Clover	726882
77320	77	Seine-et-Marne	Bassee et Basse-Yonne	Oat	13.58	59	80.122		Condiment	128373
77335	77	Seine-et-Marne	Brie Champennoise	Oat	21.89	59	129.151		Cucumber	33850
77336	77	Seine-et-Marne	Tardenois	Oat	34.17	59	201.603		DurumWheat	1.49485e+06
77337	77	Seine-et-Marne	Brie Francaise	Oat	17.73	59	104.607		Eggplant	3613.52
77338	77	Seine-et-Marne	Gatinais Pauvre	Oat	21.1	59	124.49		Endive	332588
77339	77	Seine-et-Marne	Gatinais Riche	Oat	2.7	59	15.93		Faba	433041
78053	78	Yvelines	Plaine de Versailles	Oat	15.59	59	91.981		Fennel	13132
78054	78	Yvelines	Yvelines	Oat	65.93	59	388.987		Flax	72925.9
78055	78	Yvelines	Hurepoix	Oat	14.56	59	85.904		FodderBeet	631725
78332	78	Yvelines	Vallee de la Seine	Oat	84.24	59	497.016		FodderCabbage	155759
78333	78	Yvelines	Ceinture de Paris	Oat	11.16	59	65.844		FodderCarrot	1597.58
78334	78	Yvelines	Drouais	Oat	127.19	59	750.421		FodderFaba	15277.4
89317	89	Yonne	Champagne Crayeuse	Oat	20.89	29	60.581		FodderLegumes	1120.07
91055	91	Essonne	Hurepoix	Oat	15.46	58	89.668		FodderLentil	1293.58
91342	91	Essonne	Beauce	Oat	11.03	58	63.974		FodderLupine	2678.08
95330	95	Val-d'Oise	Vexin	Oat	41.09	63	258.867		FodderPea	32507.7
2336	02	Aisne	Tardenois	Oat	12.98	60	77.88		FodderRadish	8.77138e+06
28342	28	Eure-et-Loir	Beauce	Oat	1.8	47	8.46		FodderRoots	98785
51335	51	Marne	Brie Champennoise	Oat	10.31	44	45.364		FodderTurnip	501.428
77056	77	Seine-et-Marne	Orxois	Oat	5.93	59	34.987		GardenPea	296828
77057	77	Seine-et-Marne	Brie Boisee	Oat	42.47	59	250.573		Garlic	20792.1
77058	77	Seine-et-Marne	Brie Centrale	Oat	34.39	59	202.901		Grassland	6.15841e+06
77059	77	Seine-et-Marne	Montois	Oat	54.49	59	321.491		GreenBean	409558
77060	77	Seine-et-Marne	Brie Est	Oat	127.78	59	753.902		Hazelnut	15141.2
77061	77	Seine-et-Marne	Vallees de la Marne et du Morin	Oat	152.56	59	900.104		Hemp	126357
77062	77	Seine-et-Marne	Brie Humide	Oat	77.1	59	454.89		Hop	1562.98
77064	77	Seine-et-Marne	Pays de Biere et Foret de Fontaine	Oat	9.03	59	53.277		IndustrialTomato	497841
77320	77	Seine-et-Marne	Bassee et Basse-Yonne	Oat	62.39	59	368.101		LambLettuce	14199
77329	77	Seine-et-Marne	Goele et Multien	Oat	19.74	59	116.466		Lavanda	128476
77335	77	Seine-et-Marne	Brie Champennoise	Oat	43.16	59	254.644		Leek	112635
77336	77	Seine-et-Marne	Tardenois	Oat	315.12	59	1859.21		Lentil	48472.3
77337	77	Seine-et-Marne	Brie Francaise	Oat	14.41	59	85.019		Lettuce	89477.5
77338	77	Seine-et-Marne	Gatinais Pauvre	Oat	47.85	59	282.315		Linen	680386
77339	77	Seine-et-Marne	Gatinais Riche	Oat	19.03	59	112.277		Lupine	11717.5
78054	78	Yvelines	Yvelines	Oat	44.21	59	260.839		Maize	1.18931e+07
78330	78	Yvelines	Vexin	Oat	24.79	59	146.261		MaizeFodder	1.33354e+07
78332	78	Yvelines	Vallee de la Seine	Oat	30.09	59	177.531		MaizeIrrigated	1.56009e+07
78333	78	Yvelines	Ceinture de Paris	Oat	16.55	59	97.645		Melon	263090
78334	78	Yvelines	Drouais	Oat	28.63	59	168.917		Millet	109266
78342	78	Yvelines	Beauce	Oat	0.65	59	3.835		Mint	7075.34
91055	91	Essonne	Hurepoix	Oat	22.68	58	131.544		NaturalGrassland	3.07915e+07
91337	91	Essonne	Brie Francaise	Oat	3	58	17.4		Oat	395593
91339	91	Essonne	Gatinais Riche	Oat	11.75	58	68.15		OleoMix	1410.94
91342	91	Essonne	Beauce	Oat	32.41	58	187.978		OliveTree	17523.3
95329	95	Val-d'Oise	Vieille France	Oat	2.91	63	18.333		Onion	460934
95330	95	Val-d'Oise	Vexin	Oat	69.41	63	437.283		OtherCereals	55198.9
95333	95	Val-d'Oise	Ceinture de Paris	Oat	3.21	63	20.223		OtherFodder	106370
77064	77	Seine-et-Marne	Pays de Biere et Foret de Fontaine	Condiment	0.78	61	4.758		OtherGrassland	3.08572e+06
77339	77	Seine-et-Marne	Gatinais Riche	Condiment	8	61	48.8		OtherOleo	14184.1
27080	27	Eure	Plateau de Madrie	DurumWheat	20.45	58	118.61		OtherPea	4147.87
28342	28	Eure-et-Loir	Beauce	DurumWheat	141.79	73	1035.07		Parsnip	18725.3
45339	45	Loiret	Gatinais Riche	DurumWheat	69.19	70	484.33		Pea	544367
45342	45	Loiret	Beauce	DurumWheat	19.98	70	139.86		PeachTree	3081.34
77058	77	Seine-et-Marne	Brie Centrale	DurumWheat	19.62	68	133.416		PeaMix	177401
77061	77	Seine-et-Marne	Vallees de la Marne et du Morin	DurumWheat	10.65	68	72.42		Peanut	106.363
77062	77	Seine-et-Marne	Brie Humide	DurumWheat	5.51	68	37.468		Pear	15198.5
77064	77	Seine-et-Marne	Pays de Biere et Foret de Fontaine	DurumWheat	33.91	68	230.588		Pepper	4775.57
77320	77	Seine-et-Marne	Bassee et Basse-Yonne	DurumWheat	4.87	68	33.116		Pistachio	243.013
77329	77	Seine-et-Marne	Goele et Multien	DurumWheat	7.67	68	52.156		Plum	48559.3
77335	77	Seine-et-Marne	Brie Champennoise	DurumWheat	15.8	68	107.44		PoliphytedGrassland	2.17113e+06
77336	77	Seine-et-Marne	Tardenois	DurumWheat	1.9	68	12.92		PoorPastures	425164
77337	77	Seine-et-Marne	Brie Francaise	DurumWheat	35.93	68	244.324		PotatoConsumption	7.34875e+06
77338	77	Seine-et-Marne	Gatinais Pauvre	DurumWheat	1.79	68	12.172		PotatoStarch	853630
77339	77	Seine-et-Marne	Gatinais Riche	DurumWheat	613.86	68	4174.25		Pumpkin	64337.8
78053	78	Yvelines	Plaine de Versailles	DurumWheat	240.44	71	1707.12		Radish	13194.7
78054	78	Yvelines	Yvelines	DurumWheat	161.23	71	1144.73		Rapeseed	5.11218e+06
78332	78	Yvelines	Vallee de la Seine	DurumWheat	46.87	71	332.777		Raygrass	2.34728e+06
78334	78	Yvelines	Drouais	DurumWheat	76.44	71	542.724		RedBerry	25086.3
78342	78	Yvelines	Beauce	DurumWheat	337.78	71	2398.24		Rice	66887.5
91055	91	Essonne	Hurepoix	DurumWheat	79.37	74	587.338		Rocket	9228.38
91337	91	Essonne	Brie Francaise	DurumWheat	81.27	74	601.398		Rye	401328
91339	91	Essonne	Gatinais Riche	DurumWheat	285.64	74	2113.74		Salsify	21354.4
91342	91	Essonne	Beauce	DurumWheat	1380.16	74	10213.2		SoftWheat	3.52231e+07
95330	95	Val-d'Oise	Vexin	DurumWheat	6.57	70	45.99		Soja	392184
95333	95	Val-d'Oise	Ceinture de Paris	DurumWheat	6.57	70	45.99		Sorghum	276635
45342	45	Loiret	Beauce	DurumWheat	12.6	65	81.9		Sorrel	559.531
77058	77	Seine-et-Marne	Brie Centrale	DurumWheat	34.56	68	235.008		Spelt	175352
77059	77	Seine-et-Marne	Montois	DurumWheat	0.64	68	4.352		Spinach	38867.2
77062	77	Seine-et-Marne	Brie Humide	DurumWheat	30.03	68	204.204		Strawberry	37826.1
77064	77	Seine-et-Marne	Pays de Biere et Foret de Fontaine	DurumWheat	24.99	68	169.932		SugarBeet	1.87347e+07
77320	77	Seine-et-Marne	Bassee et Basse-Yonne	DurumWheat	20.52	68	139.536		Sunchoke	8314.79
77338	77	Seine-et-Marne	Gatinais Pauvre	DurumWheat	31.81	68	216.308		Sunflower	1.85719e+06
77339	77	Seine-et-Marne	Gatinais Riche	DurumWheat	94.05	68	639.54		Swede	1457.94
78334	78	Yvelines	Drouais	DurumWheat	48.8	71	346.48		SweetCorn	440699
78342	78	Yvelines	Beauce	DurumWheat	9.86	71	70.006		TemperateFruits	863103
91055	91	Essonne	Hurepoix	DurumWheat	17.82	74	131.868		TemporaryGrassland	8.43592e+06
91337	91	Essonne	Brie Francaise	DurumWheat	29.37	74	217.338		Tobacco	3262.23
91339	91	Essonne	Gatinais Riche	DurumWheat	35.56	74	263.144		Tomato	18742
91342	91	Essonne	Beauce	DurumWheat	118.73	74	878.602		Triticale	1.67007e+06
95330	95	Val-d'Oise	Vexin	DurumWheat	1.57	45.514	7.1457		Truffle	0
2336	02	Aisne	Tardenois	SoftWheat	526.81	86	4530.57		Turnip	14718.4
10019	10	Aube	Vallee du Nogentais	SoftWheat	62.81	81	508.761		Walnut	57953
10335	10	Aube	Brie Champennoise	SoftWheat	318.81	81	2582.36		Watermelon	7425.94
27080	27	Eure	Plateau de Madrie	SoftWheat	233.22	88	2052.34		Zucchini	48427.6
27330	27	Eure	Vexin	SoftWheat	46.44	88	408.672
27332	27	Eure	Vallee de la Seine	SoftWheat	58.54	88	515.152
28334	28	Eure-et-Loir	Drouais	SoftWheat	345.62	83	2868.65
28342	28	Eure-et-Loir	Beauce	SoftWheat	1376.29	83	11423.2
45338	45	Loiret	Gatinais Pauvre	SoftWheat	91.89	70.5	647.824
45339	45	Loiret	Gatinais Riche	SoftWheat	407.19	70.5	2870.69
45342	45	Loiret	Beauce	SoftWheat	388	70.5	2735.4
51335	51	Marne	Brie Champennoise	SoftWheat	573.78	88	5049.26
60041	60	Oise	Pays de Thelle	SoftWheat	148.9	85	1265.65
60329	60	Oise	Valois et Multien	SoftWheat	923.26	85	7847.71
60330	60	Oise	Vexin	SoftWheat	785.16	85	6673.86
77045	77	Seine-et-Marne	Butte de Dammartin	SoftWheat	1499.2	85	12743.2
77056	77	Seine-et-Marne	Orxois	SoftWheat	2534.3	85	21541.6
77057	77	Seine-et-Marne	Brie Boisee	SoftWheat	4617.97	85	39252.7
77058	77	Seine-et-Marne	Brie Centrale	SoftWheat	13105.7	85	111399
77059	77	Seine-et-Marne	Montois	SoftWheat	3699.3	85	31444
77060	77	Seine-et-Marne	Brie Est	SoftWheat	8928.59	85	75893
77061	77	Seine-et-Marne	Vallees de la Marne et du Morin	SoftWheat	12200.5	85	103705
77062	77	Seine-et-Marne	Brie Humide	SoftWheat	5267.01	85	44769.6
77064	77	Seine-et-Marne	Pays de Biere et Foret de Fontaine	SoftWheat	4943.01	85	42015.6
77320	77	Seine-et-Marne	Bassee et Basse-Yonne	SoftWheat	8157.37	85	69337.6
77329	77	Seine-et-Marne	Goele et Multien	SoftWheat	11144.3	85	94726.6
77335	77	Seine-et-Marne	Brie Champennoise	SoftWheat	12606.5	85	107155
77336	77	Seine-et-Marne	Tardenois	SoftWheat	12758.6	85	108448
77337	77	Seine-et-Marne	Brie Francaise	SoftWheat	10833.9	85	92088.5
77338	77	Seine-et-Marne	Gatinais Pauvre	SoftWheat	7933.82	85	67437.5
77339	77	Seine-et-Marne	Gatinais Riche	SoftWheat	8343.33	85	70918.3
78053	78	Yvelines	Plaine de Versailles	SoftWheat	9100.73	83	75536.1
78054	78	Yvelines	Yvelines	SoftWheat	7857.67	83	65218.7
78055	78	Yvelines	Hurepoix	SoftWheat	381.87	83	3169.52
78330	78	Yvelines	Vexin	SoftWheat	1212.71	83	10065.5
78332	78	Yvelines	Vallee de la Seine	SoftWheat	3208.57	83	26631.1
78333	78	Yvelines	Ceinture de Paris	SoftWheat	709.5	83	5888.85
78334	78	Yvelines	Drouais	SoftWheat	7771.39	83	64502.5
78342	78	Yvelines	Beauce	SoftWheat	3783.57	83	31403.6
89317	89	Yonne	Champagne Crayeuse	SoftWheat	406.69	58	2358.8
89320	89	Yonne	Bassee et Basse-Yonne	SoftWheat	194.91	58	1130.48
89338	89	Yonne	Gatinais Pauvre	SoftWheat	270.92	58	1571.34
91055	91	Essonne	Hurepoix	SoftWheat	6216.78	84	52221
91333	91	Essonne	Ceinture de Paris	SoftWheat	826.65	84	6943.86
91337	91	Essonne	Brie Francaise	SoftWheat	2305.42	84	19365.5
91339	91	Essonne	Gatinais Riche	SoftWheat	5025.33	84	42212.8
91342	91	Essonne	Beauce	SoftWheat	14805.6	84	124367
92333	92	Hauts-de-Seine	Ceinture de Paris	SoftWheat	6.07	60.4915	36.7183
93329	93	Seine-Saint-Denis	Vieille France	SoftWheat	266.52	86	2292.07
94333	94	Val-de-Marne	Ceinture de Paris	SoftWheat	404.26	84	3395.78
95329	95	Val-d'Oise	Vieille France	SoftWheat	5057.13	86	43491.3
95330	95	Val-d'Oise	Vexin	SoftWheat	14934.6	86	128437
95332	95	Val-d'Oise	Vallee de la Seine	SoftWheat	320.89	86	2759.65
95333	95	Val-d'Oise	Ceinture de Paris	SoftWheat	2892.36	86	24874.3
2336	02	Aisne	Tardenois	SugarBeet	73	339.75	2480.18
10335	10	Aube	Brie Champennoise	SugarBeet	33.31	374.2	1246.46
28342	28	Eure-et-Loir	Beauce	SugarBeet	99.21	329.69	3270.85
45339	45	Loiret	Gatinais Riche	SugarBeet	100.97	374.05	3776.78
45342	45	Loiret	Beauce	SugarBeet	163.23	374.05	6105.62
51335	51	Marne	Brie Champennoise	SugarBeet	30.32	374.08	1134.21
60041	60	Oise	Pays de Thelle	SugarBeet	93.68	311.88	2921.69
60329	60	Oise	Valois et Multien	SugarBeet	450.03	311.88	14035.5
60330	60	Oise	Vexin	SugarBeet	145.45	311.88	4536.29
77045	77	Seine-et-Marne	Butte de Dammartin	SugarBeet	550	261.33	14373.1
77056	77	Seine-et-Marne	Orxois	SugarBeet	670.3	261.33	17516.9
77057	77	Seine-et-Marne	Brie Boisee	SugarBeet	477.24	261.33	12471.7
77058	77	Seine-et-Marne	Brie Centrale	SugarBeet	3923.78	261.33	102540
77059	77	Seine-et-Marne	Montois	SugarBeet	483.42	261.33	12633.2
77060	77	Seine-et-Marne	Brie Est	SugarBeet	1179.89	261.33	30834.1
77061	77	Seine-et-Marne	Vallees de la Marne et du Morin	SugarBeet	2015.26	261.33	52664.8
77062	77	Seine-et-Marne	Brie Humide	SugarBeet	564.62	261.33	14755.2
77064	77	Seine-et-Marne	Pays de Biere et Foret de Fontaine	SugarBeet	805.04	261.33	21038.1
77320	77	Seine-et-Marne	Bassee et Basse-Yonne	SugarBeet	1033.95	261.33	27020.2
77329	77	Seine-et-Marne	Goele et Multien	SugarBeet	4913.34	261.33	128400
77335	77	Seine-et-Marne	Brie Champennoise	SugarBeet	2560.83	261.33	66922.2
77336	77	Seine-et-Marne	Tardenois	SugarBeet	1877.64	261.33	49068.4
77337	77	Seine-et-Marne	Brie Francaise	SugarBeet	4297.74	261.33	112313
77338	77	Seine-et-Marne	Gatinais Pauvre	SugarBeet	835.21	261.33	21826.5
77339	77	Seine-et-Marne	Gatinais Riche	SugarBeet	2990.09	261.33	78140
78053	78	Yvelines	Plaine de Versailles	SugarBeet	135.53	222.82	3019.88
78054	78	Yvelines	Yvelines	SugarBeet	431.72	222.82	9619.59
78055	78	Yvelines	Hurepoix	SugarBeet	38.29	222.82	853.178
78330	78	Yvelines	Vexin	SugarBeet	50.89	222.82	1133.93
78332	78	Yvelines	Vallee de la Seine	SugarBeet	53.78	222.82	1198.33
78333	78	Yvelines	Ceinture de Paris	SugarBeet	44.39	222.82	989.098
78334	78	Yvelines	Drouais	SugarBeet	103.32	222.82	2302.18
78342	78	Yvelines	Beauce	SugarBeet	827.32	222.82	18434.3
89317	89	Yonne	Champagne Crayeuse	SugarBeet	19.24	339	652.236
91055	91	Essonne	Hurepoix	SugarBeet	655.86	205.43	13473.3
91333	91	Essonne	Ceinture de Paris	SugarBeet	19.63	205.43	403.259
91337	91	Essonne	Brie Francaise	SugarBeet	349.25	205.43	7174.64
91339	91	Essonne	Gatinais Riche	SugarBeet	1392.36	205.43	28603.3
91342	91	Essonne	Beauce	SugarBeet	3124.3	205.43	64182.5
93329	93	Seine-Saint-Denis	Vieille France	SugarBeet	48.13	289.413	1392.95
94333	94	Val-de-Marne	Ceinture de Paris	SugarBeet	20.9	163.4	341.506
95329	95	Val-d'Oise	Vieille France	SugarBeet	1674.33	182.88	30620.1
95330	95	Val-d'Oise	Vexin	SugarBeet	2901.88	182.88	53069.6
95332	95	Val-d'Oise	Vallee de la Seine	SugarBeet	52.49	182.88	959.937
95333	95	Val-d'Oise	Ceinture de Paris	SugarBeet	590.16	182.88	10792.8
10019	10	Aube	Vallee du Nogentais	SoftWheat	0.83	81	6.723
77056	77	Seine-et-Marne	Orxois	SoftWheat	5.76	85	48.96
77057	77	Seine-et-Marne	Brie Boisee	SoftWheat	52.83	85	449.055
77058	77	Seine-et-Marne	Brie Centrale	SoftWheat	89.8	85	763.3
77059	77	Seine-et-Marne	Montois	SoftWheat	14.04	85	119.34
77060	77	Seine-et-Marne	Brie Est	SoftWheat	110.62	85	940.27
77061	77	Seine-et-Marne	Vallees de la Marne et du Morin	SoftWheat	95.61	85	812.685
77062	77	Seine-et-Marne	Brie Humide	SoftWheat	40.12	85	341.02
77064	77	Seine-et-Marne	Pays de Biere et Foret de Fontaine	SoftWheat	74	85	629
77320	77	Seine-et-Marne	Bassee et Basse-Yonne	SoftWheat	31.97	85	271.745
77329	77	Seine-et-Marne	Goele et Multien	SoftWheat	2.57	85	21.845
77335	77	Seine-et-Marne	Brie Champennoise	SoftWheat	97.71	85	830.535
77336	77	Seine-et-Marne	Tardenois	SoftWheat	64.98	85	552.33
77337	77	Seine-et-Marne	Brie Francaise	SoftWheat	85.04	85	722.84
77338	77	Seine-et-Marne	Gatinais Pauvre	SoftWheat	76.6	85	651.1
77339	77	Seine-et-Marne	Gatinais Riche	SoftWheat	37.1	85	315.35
78053	78	Yvelines	Plaine de Versailles	SoftWheat	41.79	83	346.857
78054	78	Yvelines	Yvelines	SoftWheat	27.14	83	225.262
78334	78	Yvelines	Drouais	SoftWheat	91.78	83	761.774
91055	91	Essonne	Hurepoix	SoftWheat	43.03	84	361.452
91333	91	Essonne	Ceinture de Paris	SoftWheat	37.58	84	315.672
91337	91	Essonne	Brie Francaise	SoftWheat	26.02	84	218.568
91339	91	Essonne	Gatinais Riche	SoftWheat	206.31	84	1733
91342	91	Essonne	Beauce	SoftWheat	32.44	84	272.496
95329	95	Val-d'Oise	Vieille France	SoftWheat	1.37	86	11.782
95330	95	Val-d'Oise	Vexin	SoftWheat	18.97	86	163.142
2336	02	Aisne	Tardenois	FodderBeet	2.46	85	20.91
77056	77	Seine-et-Marne	Orxois	FodderBeet	2	339.359	67.8718
77058	77	Seine-et-Marne	Brie Centrale	FodderBeet	4.7	339.359	159.499
77060	77	Seine-et-Marne	Brie Est	FodderBeet	6.66	339.359	226.013
77061	77	Seine-et-Marne	Vallees de la Marne et du Morin	FodderBeet	5.96	339.359	202.258
77320	77	Seine-et-Marne	Bassee et Basse-Yonne	FodderBeet	11.2	339.359	380.082
77336	77	Seine-et-Marne	Tardenois	FodderBeet	12.49	339.359	423.859
77337	77	Seine-et-Marne	Brie Francaise	FodderBeet	7.78	339.359	264.021
78053	78	Yvelines	Plaine de Versailles	FodderBeet	6.58	339.359	223.298
78330	78	Yvelines	Vexin	FodderBeet	1.11	339.359	37.6688
78332	78	Yvelines	Vallee de la Seine	FodderBeet	5.82	339.359	197.507
78334	78	Yvelines	Drouais	FodderBeet	4.36	339.359	147.96
95330	95	Val-d'Oise	Vexin	FodderBeet	1.2	339.359	40.7231
77061	77	Seine-et-Marne	Vallees de la Marne et du Morin	OtherCereals	8.84	80.7	71.3388
78053	78	Yvelines	Plaine de Versailles	OtherCereals	8.1	78.3	63.423
78054	78	Yvelines	Yvelines	OtherCereals	17.21	78.3	134.754
78055	78	Yvelines	Hurepoix	OtherCereals	0.14	78.3	1.0962
78334	78	Yvelines	Drouais	OtherCereals	2.4	78.3	18.792
91055	91	Essonne	Hurepoix	OtherCereals	13.29	79	104.991
91337	91	Essonne	Brie Francaise	OtherCereals	4.91	79	38.789
91339	91	Essonne	Gatinais Riche	OtherCereals	31.64	79	249.956
91342	91	Essonne	Beauce	OtherCereals	3.83	79	30.257
95330	95	Val-d'Oise	Vexin	OtherCereals	3.04	81.4	24.7456
77057	77	Seine-et-Marne	Brie Boisee	Carrot	0.19	305.68	5.80792
77058	77	Seine-et-Marne	Brie Centrale	Carrot	1.9	305.68	58.0792
77060	77	Seine-et-Marne	Brie Est	Carrot	8.72	305.68	266.553
77061	77	Seine-et-Marne	Vallees de la Marne et du Morin	Carrot	1.5	305.68	45.852
77320	77	Seine-et-Marne	Bassee et Basse-Yonne	Carrot	3.2	305.68	97.8176
77329	77	Seine-et-Marne	Goele et Multien	Carrot	0.5	305.68	15.284
77335	77	Seine-et-Marne	Brie Champennoise	Carrot	25.15	305.68	768.785
77338	77	Seine-et-Marne	Gatinais Pauvre	Carrot	4.21	305.68	128.691
77339	77	Seine-et-Marne	Gatinais Riche	Carrot	0.12	305.68	3.66816
78053	78	Yvelines	Plaine de Versailles	Carrot	17.21	280.5	482.741
78332	78	Yvelines	Vallee de la Seine	Carrot	7.49	280.5	210.095
78333	78	Yvelines	Ceinture de Paris	Carrot	3.46	280.5	97.053
78342	78	Yvelines	Beauce	Carrot	22.55	280.5	632.528
91337	91	Essonne	Brie Francaise	Carrot	3.8	306.5	116.47
91342	91	Essonne	Beauce	Carrot	22.34	306.5	684.721
95329	95	Val-d'Oise	Vieille France	Carrot	1.06	298.79	31.6717
95333	95	Val-d'Oise	Ceinture de Paris	Carrot	1.87	298.79	55.8737
78332	78	Yvelines	Vallee de la Seine	Cherry	0.25	34.38	0.8595
77335	77	Seine-et-Marne	Brie Champennoise	Cucumber	0.11	957.18	10.529
77338	77	Seine-et-Marne	Gatinais Pauvre	Cucumber	0.82	957.18	78.4888
77057	77	Seine-et-Marne	Brie Boisee	Zucchini	0.21	162.05	3.40305
77058	77	Seine-et-Marne	Brie Centrale	Zucchini	3.91	162.05	63.3616
77061	77	Seine-et-Marne	Vallees de la Marne et du Morin	Zucchini	1	162.05	16.205
77329	77	Seine-et-Marne	Goele et Multien	Zucchini	3.25	162.05	52.6663
77335	77	Seine-et-Marne	Brie Champennoise	Zucchini	0.56	162.05	9.0748
78332	78	Yvelines	Vallee de la Seine	Zucchini	2.86	265.47	75.9244
91055	91	Essonne	Hurepoix	Zucchini	0.32	219.49	7.02368
95329	95	Val-d'Oise	Vieille France	Zucchini	3.01	222.66	67.0207
77058	77	Seine-et-Marne	Brie Centrale	Celery	0.33	215	7.095
77061	77	Seine-et-Marne	Vallees de la Marne et du Morin	Celery	0.5	215	10.75
77064	77	Seine-et-Marne	Pays de Biere et Foret de Fontaine	Celery	5.4	215	116.1
77320	77	Seine-et-Marne	Bassee et Basse-Yonne	Celery	0.26	215	5.59
78332	78	Yvelines	Vallee de la Seine	Celery	0.3	219	6.57
78333	78	Yvelines	Ceinture de Paris	Celery	4.6	219	100.74
95329	95	Val-d'Oise	Vieille France	Celery	0.14	205	2.87
95333	95	Val-d'Oise	Ceinture de Paris	Celery	1	205	20.5
77056	77	Seine-et-Marne	Orxois	Endive	5.98	199.768	119.461
77057	77	Seine-et-Marne	Brie Boisee	Endive	0.36	199.768	7.19164
77062	77	Seine-et-Marne	Brie Humide	Endive	2.78	199.768	55.5355
77320	77	Seine-et-Marne	Bassee et Basse-Yonne	Endive	7.07	199.768	141.236
77329	77	Seine-et-Marne	Goele et Multien	Endive	10.3	199.768	205.761
91342	91	Essonne	Beauce	Endive	8.17	199.768	163.21
77060	77	Seine-et-Marne	Brie Est	OtherCereals	5.24	80.7	42.2868
78334	78	Yvelines	Drouais	OtherCereals	4.34	78.3	33.9822
77320	77	Seine-et-Marne	Bassee et Basse-Yonne	Condiment	1.95	61	11.895
77059	77	Seine-et-Marne	Montois	OtherCereals	12.11	80.7	97.7277
77060	77	Seine-et-Marne	Brie Est	OtherCereals	13.57	80.7	109.51
77339	77	Seine-et-Marne	Gatinais Riche	OtherCereals	5.28	80.7	42.6096
95330	95	Val-d'Oise	Vexin	OtherCereals	18.81	81.4	153.113
77058	77	Seine-et-Marne	Brie Centrale	Cabbage	0.19	137	2.603
77061	77	Seine-et-Marne	Vallees de la Marne et du Morin	Cabbage	2	137	27.4
77320	77	Seine-et-Marne	Bassee et Basse-Yonne	Cabbage	0.77	137	10.549
77329	77	Seine-et-Marne	Goele et Multien	Cabbage	16.04	137	219.748
77335	77	Seine-et-Marne	Brie Champennoise	Cabbage	4.43	137	60.691
78332	78	Yvelines	Vallee de la Seine	Cabbage	3.79	186.19	70.566
91055	91	Essonne	Hurepoix	Cabbage	0.61	147.86	9.01946
91333	91	Essonne	Ceinture de Paris	Cabbage	2.42	147.86	35.7821
95333	95	Val-d'Oise	Ceinture de Paris	Cabbage	1.32	143.62	18.9578
10317	10	Aube	Champagne Crayeuse	Hemp	14.67	72.2	105.917
10335	10	Aube	Brie Champennoise	Hemp	11.9	72.2	85.918
51335	51	Marne	Brie Champennoise	Hemp	0.85	75.4	6.409
77045	77	Seine-et-Marne	Butte de Dammartin	Hemp	9.15	71.91	65.7977
77056	77	Seine-et-Marne	Orxois	Hemp	14.07	71.91	101.177
77057	77	Seine-et-Marne	Brie Boisee	Hemp	9.65	71.91	69.3931
77058	77	Seine-et-Marne	Brie Centrale	Hemp	70.46	71.91	506.678
77060	77	Seine-et-Marne	Brie Est	Hemp	132.54	71.91	953.095
77061	77	Seine-et-Marne	Vallees de la Marne et du Morin	Hemp	174.34	71.91	1253.68
77062	77	Seine-et-Marne	Brie Humide	Hemp	46.56	71.91	334.813
77320	77	Seine-et-Marne	Bassee et Basse-Yonne	Hemp	82.56	71.91	593.689
77329	77	Seine-et-Marne	Goele et Multien	Hemp	74.68	71.91	537.024
77335	77	Seine-et-Marne	Brie Champennoise	Hemp	256.33	71.91	1843.27
77336	77	Seine-et-Marne	Tardenois	Hemp	153.23	71.91	1101.88
77337	77	Seine-et-Marne	Brie Francaise	Hemp	40.81	71.91	293.465
77338	77	Seine-et-Marne	Gatinais Pauvre	Hemp	6.39	71.91	45.9505
77339	77	Seine-et-Marne	Gatinais Riche	Hemp	26.57	71.91	191.065
78054	78	Yvelines	Yvelines	Hemp	33.93	47.1497	159.979
78342	78	Yvelines	Beauce	Hemp	22.58	47.1497	106.464
91055	91	Essonne	Hurepoix	Hemp	26.57	72.12	191.623
91337	91	Essonne	Brie Francaise	Hemp	15.34	72.12	110.632
91339	91	Essonne	Gatinais Riche	Hemp	26.37	72.12	190.18
91342	91	Essonne	Beauce	Hemp	26.36	72.12	190.108
95329	95	Val-d'Oise	Vieille France	Hemp	10.5	47.1497	49.5072
77064	77	Seine-et-Marne	Pays de Biere et Foret de Fontaine	Condiment	0.78	61	4.758
78342	78	Yvelines	Beauce	Condiment	44.19	490	2165.31
91339	91	Essonne	Gatinais Riche	Condiment	0.02	644	1.288
77058	77	Seine-et-Marne	Brie Centrale	Butternot	12.25	162.05	198.511
77060	77	Seine-et-Marne	Brie Est	Butternot	1.09	162.05	17.6635
77061	77	Seine-et-Marne	Vallees de la Marne et du Morin	Butternot	2.05	162.05	33.2203
77062	77	Seine-et-Marne	Brie Humide	Butternot	0.11	162.05	1.78255
77329	77	Seine-et-Marne	Goele et Multien	Butternot	2.42	162.05	39.2161
77335	77	Seine-et-Marne	Brie Champennoise	Butternot	0.72	162.05	11.6676
77337	77	Seine-et-Marne	Brie Francaise	Butternot	8.09	162.05	131.098
77338	77	Seine-et-Marne	Gatinais Pauvre	Butternot	0.6	162.05	9.723
78053	78	Yvelines	Plaine de Versailles	Butternot	0.38	265.47	10.0879
78054	78	Yvelines	Yvelines	Butternot	0.13	265.47	3.45111
78055	78	Yvelines	Hurepoix	Butternot	1.13	265.47	29.9981
78332	78	Yvelines	Vallee de la Seine	Butternot	6.55	265.47	173.883
91055	91	Essonne	Hurepoix	Butternot	1.67	219.49	36.6548
91339	91	Essonne	Gatinais Riche	Butternot	3.22	219.49	70.6758
91342	91	Essonne	Beauce	Butternot	1.67	219.49	36.6548
95329	95	Val-d'Oise	Vieille France	Butternot	1.71	222.66	38.0749
95333	95	Val-d'Oise	Ceinture de Paris	Butternot	2.25	222.66	50.0985
77060	77	Seine-et-Marne	Brie Est	Aroma	3.17	5	1.585
77061	77	Seine-et-Marne	Vallees de la Marne et du Morin	Aroma	0.62	5	0.31
77320	77	Seine-et-Marne	Bassee et Basse-Yonne	Aroma	2	5	1
78053	78	Yvelines	Plaine de Versailles	Aroma	17.59	0	0
78054	78	Yvelines	Yvelines	Aroma	1.25	0	0
78334	78	Yvelines	Drouais	Aroma	1.51	0	0
91333	91	Essonne	Ceinture de Paris	Aroma	1.7	3.54	0.6018
91339	91	Essonne	Gatinais Riche	Aroma	0.77	3.54	0.27258
91342	91	Essonne	Beauce	Aroma	1.3	3.54	0.4602
95330	95	Val-d'Oise	Vexin	Aroma	7.48	0	0
77058	77	Seine-et-Marne	Brie Centrale	Aroma	0.5	5	0.25
91339	91	Essonne	Gatinais Riche	Aroma	0.56	3.54	0.19824
95333	95	Val-d'Oise	Ceinture de Paris	Aroma	1.87	0	0
77061	77	Seine-et-Marne	Vallees de la Marne et du Morin	OtherCereals	4.08	80.7	32.9256
77061	77	Seine-et-Marne	Vallees de la Marne et du Morin	OtherCereals	1.55	80.7	12.5085
77335	77	Seine-et-Marne	Brie Champennoise	TemporaryGrassland	0.43	77.5	3.3325
78054	78	Yvelines	Yvelines	TemporaryGrassland	4.21	75.4	31.7434
78053	78	Yvelines	Plaine de Versailles	OtherCereals	2.25	78.3	17.6175
77061	77	Seine-et-Marne	Vallees de la Marne et du Morin	OtherCereals	2.47	80.7	19.9329
77057	77	Seine-et-Marne	Brie Boisee	Condiment	8.2	61	50.02
77061	77	Seine-et-Marne	Vallees de la Marne et du Morin	Condiment	5.62	61	34.282
77064	77	Seine-et-Marne	Pays de Biere et Foret de Fontaine	Condiment	9.16	61	55.876
77339	77	Seine-et-Marne	Gatinais Riche	Condiment	24.87	61	151.707
78053	78	Yvelines	Plaine de Versailles	Condiment	2.59	490	126.91
78332	78	Yvelines	Vallee de la Seine	Condiment	6.18	490	302.82
91339	91	Essonne	Gatinais Riche	Condiment	7.43	644	478.492
95329	95	Val-d'Oise	Vieille France	Condiment	4.15	771	319.965
2336	02	Aisne	Tardenois	Rapeseed	151.86	45	683.37
10317	10	Aube	Champagne Crayeuse	Rapeseed	3.48	39	13.572
10335	10	Aube	Brie Champennoise	Rapeseed	122.57	39	478.023
27080	27	Eure	Plateau de Madrie	Rapeseed	115.53	42	485.226
27332	27	Eure	Vallee de la Seine	Rapeseed	61.1	42	256.62
28334	28	Eure-et-Loir	Drouais	Rapeseed	76.51	40	306.04
28342	28	Eure-et-Loir	Beauce	Rapeseed	648.2	40	2592.8
45338	45	Loiret	Gatinais Pauvre	Rapeseed	121.97	34	414.698
45339	45	Loiret	Gatinais Riche	Rapeseed	143.84	34	489.056
45342	45	Loiret	Beauce	Rapeseed	172.36	34	586.024
51335	51	Marne	Brie Champennoise	Rapeseed	390.96	42	1642.03
60041	60	Oise	Pays de Thelle	Rapeseed	42.91	45	193.095
60329	60	Oise	Valois et Multien	Rapeseed	139.42	45	627.39
60330	60	Oise	Vexin	Rapeseed	172.51	45	776.295
77045	77	Seine-et-Marne	Butte de Dammartin	Rapeseed	313.23	42	1315.57
77056	77	Seine-et-Marne	Orxois	Rapeseed	781.43	42	3282.01
77057	77	Seine-et-Marne	Brie Boisee	Rapeseed	1584.23	42	6653.77
77058	77	Seine-et-Marne	Brie Centrale	Rapeseed	2025.53	42	8507.23
77059	77	Seine-et-Marne	Montois	Rapeseed	1279.57	42	5374.19
77060	77	Seine-et-Marne	Brie Est	Rapeseed	2216.22	42	9308.12
77061	77	Seine-et-Marne	Vallees de la Marne et du Morin	Rapeseed	2961.74	42	12439.3
77062	77	Seine-et-Marne	Brie Humide	Rapeseed	1652.85	42	6941.97
77064	77	Seine-et-Marne	Pays de Biere et Foret de Fontaine	Rapeseed	2143.32	42	9001.94
77320	77	Seine-et-Marne	Bassee et Basse-Yonne	Rapeseed	2251.3	42	9455.46
77329	77	Seine-et-Marne	Goele et Multien	Rapeseed	2452.29	42	10299.6
77335	77	Seine-et-Marne	Brie Champennoise	Rapeseed	4804.16	42	20177.5
77336	77	Seine-et-Marne	Tardenois	Rapeseed	2338.93	42	9823.51
77337	77	Seine-et-Marne	Brie Francaise	Rapeseed	2894.13	42	12155.3
77338	77	Seine-et-Marne	Gatinais Pauvre	Rapeseed	4043.11	42	16981.1
77339	77	Seine-et-Marne	Gatinais Riche	Rapeseed	2449.1	42	10286.2
78053	78	Yvelines	Plaine de Versailles	Rapeseed	3592.13	42	15086.9
78054	78	Yvelines	Yvelines	Rapeseed	3368.96	42	14149.6
78055	78	Yvelines	Hurepoix	Rapeseed	177.33	42	744.786
78330	78	Yvelines	Vexin	Rapeseed	444.26	42	1865.89
78332	78	Yvelines	Vallee de la Seine	Rapeseed	775.16	42	3255.67
78333	78	Yvelines	Ceinture de Paris	Rapeseed	334.61	42	1405.36
78334	78	Yvelines	Drouais	Rapeseed	3043.36	42	12782.1
78342	78	Yvelines	Beauce	Rapeseed	1591.4	42	6683.88
89317	89	Yonne	Champagne Crayeuse	Rapeseed	97.39	33	321.387
89320	89	Yonne	Bassee et Basse-Yonne	Rapeseed	84.16	33	277.728
89338	89	Yonne	Gatinais Pauvre	Rapeseed	120.78	33	398.574
91055	91	Essonne	Hurepoix	Rapeseed	2181.2	41	8942.92
91333	91	Essonne	Ceinture de Paris	Rapeseed	194.78	41	798.598
91337	91	Essonne	Brie Francaise	Rapeseed	939.13	41	3850.43
91339	91	Essonne	Gatinais Riche	Rapeseed	1413.53	41	5795.47
91342	91	Essonne	Beauce	Rapeseed	6062.16	41	24854.9
93329	93	Seine-Saint-Denis	Vieille France	Rapeseed	94.56	44	416.064
93333	93	Seine-Saint-Denis	Ceinture de Paris	Rapeseed	17.78	44	78.232
94333	94	Val-de-Marne	Ceinture de Paris	Rapeseed	66.01	41	270.641
95329	95	Val-d'Oise	Vieille France	Rapeseed	1007.74	44	4434.06
95330	95	Val-d'Oise	Vexin	Rapeseed	4655.76	44	20485.3
95332	95	Val-d'Oise	Vallee de la Seine	Rapeseed	53.73	44	236.412
95333	95	Val-d'Oise	Ceinture de Paris	Rapeseed	553.14	44	2433.82
28334	28	Eure-et-Loir	Drouais	Rapeseed	0.87	38	3.306
77058	77	Seine-et-Marne	Brie Centrale	Rapeseed	12.71	42	53.382
77337	77	Seine-et-Marne	Brie Francaise	Rapeseed	0.39	42	1.638
78334	78	Yvelines	Drouais	Rapeseed	0.87	42	3.654
77059	77	Seine-et-Marne	Montois	TemporaryGrassland	8.47	77.5	65.6425
77061	77	Seine-et-Marne	Vallees de la Marne et du Morin	TemporaryGrassland	0.42	77.5	3.255
77064	77	Seine-et-Marne	Pays de Biere et Foret de Fontaine	TemporaryGrassland	1.14	77.5	8.835
77320	77	Seine-et-Marne	Bassee et Basse-Yonne	TemporaryGrassland	0.69	77.5	5.3475
77336	77	Seine-et-Marne	Tardenois	TemporaryGrassland	21.82	77.5	169.105
78054	78	Yvelines	Yvelines	TemporaryGrassland	16.37	75.4	123.43
78334	78	Yvelines	Drouais	TemporaryGrassland	1.35	75.4	10.179
91339	91	Essonne	Gatinais Riche	TemporaryGrassland	2.42	78	18.876
91342	91	Essonne	Beauce	TemporaryGrassland	0.99	78	7.722
28334	28	Eure-et-Loir	Drouais	Spelt	3.03	83	25.149
77057	77	Seine-et-Marne	Brie Boisee	Spelt	29.79	85	253.215
77058	77	Seine-et-Marne	Brie Centrale	Spelt	28.21	85	239.785
77059	77	Seine-et-Marne	Montois	Spelt	26.01	85	221.085
77060	77	Seine-et-Marne	Brie Est	Spelt	5.11	85	43.435
77061	77	Seine-et-Marne	Vallees de la Marne et du Morin	Spelt	23.52	85	199.92
77064	77	Seine-et-Marne	Pays de Biere et Foret de Fontaine	Spelt	8.2	85	69.7
77320	77	Seine-et-Marne	Bassee et Basse-Yonne	Spelt	8.26	85	70.21
77336	77	Seine-et-Marne	Tardenois	Spelt	12.36	85	105.06
77337	77	Seine-et-Marne	Brie Francaise	Spelt	34.94	85	296.99
77338	77	Seine-et-Marne	Gatinais Pauvre	Spelt	9.16	85	77.86
78053	78	Yvelines	Plaine de Versailles	Spelt	3	83	24.9
78054	78	Yvelines	Yvelines	Spelt	72.27	83	599.841
78332	78	Yvelines	Vallee de la Seine	Spelt	2.67	83	22.161
78334	78	Yvelines	Drouais	Spelt	6.9	83	57.27
91055	91	Essonne	Hurepoix	Spelt	17.07	84	143.388
91337	91	Essonne	Brie Francaise	Spelt	3.01	84	25.284
91339	91	Essonne	Gatinais Riche	Spelt	2.88	84	24.192
91342	91	Essonne	Beauce	Spelt	12.08	84	101.472
95330	95	Val-d'Oise	Vexin	Spelt	27.91	86	240.026
77057	77	Seine-et-Marne	Brie Boisee	Spinach	0.19	188.63	3.58397
77058	77	Seine-et-Marne	Brie Centrale	Spinach	0.19	188.63	3.58397
77064	77	Seine-et-Marne	Pays de Biere et Foret de Fontaine	Spinach	50.71	188.63	956.543
78333	78	Yvelines	Ceinture de Paris	Spinach	2.87	94.27	27.0555
78342	78	Yvelines	Beauce	Spinach	20.8	94.27	196.082
28342	28	Eure-et-Loir	Beauce	Condiment	9.86	80	78.88
77064	77	Seine-et-Marne	Pays de Biere et Foret de Fontaine	Condiment	0.18	61	1.098
77339	77	Seine-et-Marne	Gatinais Riche	Condiment	36.12	61	220.332
78342	78	Yvelines	Beauce	Condiment	77.83	490	3813.67
91339	91	Essonne	Gatinais Riche	Condiment	23.33	644	1502.45
91342	91	Essonne	Beauce	Condiment	9.86	644	634.984
2336	02	Aisne	Tardenois	OtherFodder	0.76	110	8.36
77056	77	Seine-et-Marne	Orxois	OtherFodder	3.09	87	26.883
77061	77	Seine-et-Marne	Vallees de la Marne et du Morin	OtherFodder	31.42	87	273.354
77064	77	Seine-et-Marne	Pays de Biere et Foret de Fontaine	OtherFodder	0.85	87	7.395
77336	77	Seine-et-Marne	Tardenois	OtherFodder	2.72	87	23.664
78054	78	Yvelines	Yvelines	OtherFodder	7.45	84	62.58
78332	78	Yvelines	Vallee de la Seine	OtherFodder	2.06	84	17.304
91055	91	Essonne	Hurepoix	OtherFodder	10.34	82	84.788
91337	91	Essonne	Brie Francaise	OtherFodder	5.97	82	48.954
91339	91	Essonne	Gatinais Riche	OtherFodder	1.98	82	16.236
91342	91	Essonne	Beauce	OtherFodder	5.36	82	43.952
95330	95	Val-d'Oise	Vexin	OtherFodder	1.24	87	10.788
60330	60	Oise	Vexin	TemporaryGrassland	5.7	67.9	38.703
77056	77	Seine-et-Marne	Orxois	TemporaryGrassland	1.86	77.5	14.415
77058	77	Seine-et-Marne	Brie Centrale	TemporaryGrassland	0.23	77.5	1.7825
77061	77	Seine-et-Marne	Vallees de la Marne et du Morin	TemporaryGrassland	31.55	77.5	244.512
77062	77	Seine-et-Marne	Brie Humide	TemporaryGrassland	26.29	77.5	203.748
77064	77	Seine-et-Marne	Pays de Biere et Foret de Fontaine	TemporaryGrassland	6.28	77.5	48.67
77320	77	Seine-et-Marne	Bassee et Basse-Yonne	TemporaryGrassland	12.09	77.5	93.6975
77329	77	Seine-et-Marne	Goele et Multien	TemporaryGrassland	4.31	77.5	33.4025
77335	77	Seine-et-Marne	Brie Champennoise	TemporaryGrassland	24.5	77.5	189.875
77336	77	Seine-et-Marne	Tardenois	TemporaryGrassland	9.1	77.5	70.525
77337	77	Seine-et-Marne	Brie Francaise	TemporaryGrassland	0.08	77.5	0.62
77339	77	Seine-et-Marne	Gatinais Riche	TemporaryGrassland	10.58	77.5	81.995
78053	78	Yvelines	Plaine de Versailles	TemporaryGrassland	2.72	75.4	20.5088
78054	78	Yvelines	Yvelines	TemporaryGrassland	27.56	75.4	207.802
78055	78	Yvelines	Hurepoix	TemporaryGrassland	10.33	75.4	77.8882
78332	78	Yvelines	Vallee de la Seine	TemporaryGrassland	8.07	75.4	60.8478
78334	78	Yvelines	Drouais	TemporaryGrassland	0.8	75.4	6.032
89338	89	Yonne	Gatinais Pauvre	TemporaryGrassland	1.71	61.7	10.5507
91055	91	Essonne	Hurepoix	TemporaryGrassland	39.94	78	311.532
91337	91	Essonne	Brie Francaise	TemporaryGrassland	0.74	78	5.772
91339	91	Essonne	Gatinais Riche	TemporaryGrassland	14.68	78	114.504
91342	91	Essonne	Beauce	TemporaryGrassland	0.51	78	3.978
95330	95	Val-d'Oise	Vexin	TemporaryGrassland	9.35	73.2	68.442
77057	77	Seine-et-Marne	Brie Boisee	Faba	0.21	34	0.714
77335	77	Seine-et-Marne	Brie Champennoise	Faba	0.22	34	0.748
78053	78	Yvelines	Plaine de Versailles	Faba	0.16	28	0.448
95329	95	Val-d'Oise	Vieille France	Faba	1.36	30	4.08
77057	77	Seine-et-Marne	Brie Boisee	FodderFaba	11.1	87	96.57
78053	78	Yvelines	Plaine de Versailles	FodderFaba	7.07	84	59.388
78334	78	Yvelines	Drouais	Fennel	9.73	490	476.77
77061	77	Seine-et-Marne	Vallees de la Marne et du Morin	Condiment	0.14	61	0.854
77329	77	Seine-et-Marne	Goele et Multien	Condiment	0.51	61	3.111
77336	77	Seine-et-Marne	Tardenois	Condiment	1.43	61	8.723
78053	78	Yvelines	Plaine de Versailles	Condiment	4.98	490	244.02
91342	91	Essonne	Beauce	Condiment	0.89	644	57.316
77057	77	Seine-et-Marne	Brie Boisee	Strawberry	0.07	97.27	0.68089
77058	77	Seine-et-Marne	Brie Centrale	Strawberry	2.54	97.27	24.7066
77060	77	Seine-et-Marne	Brie Est	Strawberry	0.84	97.27	8.17068
77061	77	Seine-et-Marne	Vallees de la Marne et du Morin	Strawberry	1.72	97.27	16.7304
77062	77	Seine-et-Marne	Brie Humide	Strawberry	0.03	97.27	0.29181
77064	77	Seine-et-Marne	Pays de Biere et Foret de Fontaine	Strawberry	0.57	97.27	5.54439
77320	77	Seine-et-Marne	Bassee et Basse-Yonne	Strawberry	0.56	97.27	5.44712
77329	77	Seine-et-Marne	Goele et Multien	Strawberry	0.24	97.27	2.33448
77335	77	Seine-et-Marne	Brie Champennoise	Strawberry	0.6	97.27	5.8362
77336	77	Seine-et-Marne	Tardenois	Strawberry	2.16	97.27	21.0103
77337	77	Seine-et-Marne	Brie Francaise	Strawberry	3.92	97.27	38.1298
77338	77	Seine-et-Marne	Gatinais Pauvre	Strawberry	1.41	97.27	13.7151
78053	78	Yvelines	Plaine de Versailles	Strawberry	2.91	108.24	31.4978
78054	78	Yvelines	Yvelines	Strawberry	0.05	108.24	0.5412
78332	78	Yvelines	Vallee de la Seine	Strawberry	2.08	108.24	22.5139
78333	78	Yvelines	Ceinture de Paris	Strawberry	1.16	108.24	12.5558
91337	91	Essonne	Brie Francaise	Strawberry	0.81	114.3	9.2583
91339	91	Essonne	Gatinais Riche	Strawberry	0.02	114.3	0.2286
91342	91	Essonne	Beauce	Strawberry	1.62	114.3	18.5166
95329	95	Val-d'Oise	Vieille France	Strawberry	0.19	106.39	2.02141
95330	95	Val-d'Oise	Vexin	Strawberry	2.7	106.39	28.7253
95333	95	Val-d'Oise	Ceinture de Paris	Strawberry	0.2	106.39	2.1278
77062	77	Seine-et-Marne	Brie Humide	FodderRoots	1.58	339.359	53.6187
78054	78	Yvelines	Yvelines	FodderRoots	28.52	339.359	967.851
78055	78	Yvelines	Hurepoix	FodderRoots	31.67	339.359	1074.75
91055	91	Essonne	Hurepoix	FodderRoots	52.4	339.359	1778.24
91339	91	Essonne	Gatinais Riche	FodderRoots	15.21	339.359	516.165
2336	02	Aisne	Tardenois	Faba	22.16	37	81.992
10019	10	Aube	Vallee du Nogentais	Faba	1.13	20	2.26
28334	28	Eure-et-Loir	Drouais	Faba	1.47	25	3.675
28342	28	Eure-et-Loir	Beauce	Faba	8.67	25	21.675
45339	45	Loiret	Gatinais Riche	Faba	11.33	28	31.724
45342	45	Loiret	Beauce	Faba	5.13	28	14.364
60330	60	Oise	Vexin	Faba	54.48	37	201.576
77045	77	Seine-et-Marne	Butte de Dammartin	Faba	22.38	34	76.092
77056	77	Seine-et-Marne	Orxois	Faba	48.21	34	163.914
77057	77	Seine-et-Marne	Brie Boisee	Faba	70.12	34	238.408
77058	77	Seine-et-Marne	Brie Centrale	Faba	497.02	34	1689.87
77059	77	Seine-et-Marne	Montois	Faba	40.31	34	137.054
77060	77	Seine-et-Marne	Brie Est	Faba	228.89	34	778.226
77061	77	Seine-et-Marne	Vallees de la Marne et du Morin	Faba	334.47	34	1137.2
77062	77	Seine-et-Marne	Brie Humide	Faba	228.02	34	775.268
77064	77	Seine-et-Marne	Pays de Biere et Foret de Fontaine	Faba	59.57	34	202.538
77320	77	Seine-et-Marne	Bassee et Basse-Yonne	Faba	79.7	34	270.98
77329	77	Seine-et-Marne	Goele et Multien	Faba	115.42	34	392.428
77335	77	Seine-et-Marne	Brie Champennoise	Faba	187.84	34	638.656
77336	77	Seine-et-Marne	Tardenois	Faba	342.72	34	1165.25
77337	77	Seine-et-Marne	Brie Francaise	Faba	124.16	34	422.144
77338	77	Seine-et-Marne	Gatinais Pauvre	Faba	257.38	34	875.092
77339	77	Seine-et-Marne	Gatinais Riche	Faba	82.64	34	280.976
78053	78	Yvelines	Plaine de Versailles	Faba	277.73	28	777.644
78054	78	Yvelines	Yvelines	Faba	329.76	28	923.328
78330	78	Yvelines	Vexin	Faba	9.09	28	25.452
78332	78	Yvelines	Vallee de la Seine	Faba	105.38	28	295.064
78333	78	Yvelines	Ceinture de Paris	Faba	49.53	28	138.684
78334	78	Yvelines	Drouais	Faba	254.46	28	712.488
78342	78	Yvelines	Beauce	Faba	32.71	28	91.588
89317	89	Yonne	Champagne Crayeuse	Faba	7.12	15	10.68
91055	91	Essonne	Hurepoix	Faba	298.85	34	1016.09
91333	91	Essonne	Ceinture de Paris	Faba	51.72	34	175.848
91337	91	Essonne	Brie Francaise	Faba	22.65	34	77.01
91339	91	Essonne	Gatinais Riche	Faba	165.96	34	564.264
91342	91	Essonne	Beauce	Faba	296.71	34	1008.81
94333	94	Val-de-Marne	Ceinture de Paris	Faba	52.56	34	178.704
95329	95	Val-d'Oise	Vieille France	Faba	24.07	30	72.21
95330	95	Val-d'Oise	Vexin	Faba	194.42	30	583.26
95332	95	Val-d'Oise	Vallee de la Seine	Faba	15.62	30	46.86
95333	95	Val-d'Oise	Ceinture de Paris	Faba	53.42	30	160.26
77056	77	Seine-et-Marne	Orxois	TemporaryGrassland	18.61	77.5	144.227
77057	77	Seine-et-Marne	Brie Boisee	TemporaryGrassland	3.18	77.5	24.645
77058	77	Seine-et-Marne	Brie Centrale	TemporaryGrassland	2.2	77.5	17.05
77060	77	Seine-et-Marne	Brie Est	TemporaryGrassland	6.16	77.5	47.74
77061	77	Seine-et-Marne	Vallees de la Marne et du Morin	TemporaryGrassland	27.73	77.5	214.907
77320	77	Seine-et-Marne	Bassee et Basse-Yonne	TemporaryGrassland	2.07	77.5	16.0425
77329	77	Seine-et-Marne	Goele et Multien	TemporaryGrassland	0.59	77.5	4.5725
77335	77	Seine-et-Marne	Brie Champennoise	TemporaryGrassland	2.7	77.5	20.925
77336	77	Seine-et-Marne	Tardenois	TemporaryGrassland	0.21	77.5	1.6275
77338	77	Seine-et-Marne	Gatinais Pauvre	TemporaryGrassland	2.43	77.5	18.8325
78053	78	Yvelines	Plaine de Versailles	TemporaryGrassland	0.67	75.4	5.0518
78054	78	Yvelines	Yvelines	TemporaryGrassland	0.8	75.4	6.032
78055	78	Yvelines	Hurepoix	TemporaryGrassland	2.34	75.4	17.6436
95330	95	Val-d'Oise	Vexin	TemporaryGrassland	9.59	73.2	70.1988
28342	28	Eure-et-Loir	Beauce	GreenBean	8	133.18	106.544
60329	60	Oise	Valois et Multien	GreenBean	7.36	154.67	113.837
77045	77	Seine-et-Marne	Butte de Dammartin	GreenBean	29.4	143.77	422.684
77058	77	Seine-et-Marne	Brie Centrale	GreenBean	11.76	143.77	169.074
77060	77	Seine-et-Marne	Brie Est	GreenBean	19.78	143.77	284.377
77061	77	Seine-et-Marne	Vallees de la Marne et du Morin	GreenBean	42.38	143.77	609.297
77320	77	Seine-et-Marne	Bassee et Basse-Yonne	GreenBean	20.73	143.77	298.035
77329	77	Seine-et-Marne	Goele et Multien	GreenBean	302.46	143.77	4348.47
77336	77	Seine-et-Marne	Tardenois	GreenBean	15.22	143.77	218.818
77337	77	Seine-et-Marne	Brie Francaise	GreenBean	0.3	143.77	4.3131
77339	77	Seine-et-Marne	Gatinais Riche	GreenBean	9.16	143.77	131.693
78054	78	Yvelines	Yvelines	GreenBean	10.51	81.64	85.8036
78055	78	Yvelines	Hurepoix	GreenBean	1.69	81.64	13.7972
78332	78	Yvelines	Vallee de la Seine	GreenBean	0.72	81.64	5.87808
78342	78	Yvelines	Beauce	GreenBean	106.83	81.64	872.16
91055	91	Essonne	Hurepoix	GreenBean	11.16	85.91	95.8756
91342	91	Essonne	Beauce	GreenBean	114.09	85.91	980.147
95329	95	Val-d'Oise	Vieille France	GreenBean	4.99	66.31	33.0887
95330	95	Val-d'Oise	Vexin	GreenBean	15.14	66.31	100.393
77058	77	Seine-et-Marne	Brie Centrale	Hop	0.38	28.4089	1.07954
77061	77	Seine-et-Marne	Vallees de la Marne et du Morin	Hop	0.16	28.4089	0.454542
77337	77	Seine-et-Marne	Brie Francaise	Hop	0.3	28.4089	0.852267
78055	78	Yvelines	Hurepoix	Hop	2	28.4089	5.68178
78333	78	Yvelines	Ceinture de Paris	Hop	0.16	28.4089	0.454542
94333	94	Val-de-Marne	Ceinture de Paris	Hop	0.05	28.4089	0.142044
77064	77	Seine-et-Marne	Pays de Biere et Foret de Fontaine	Lavanda	33.94	30.9123	104.916
77339	77	Seine-et-Marne	Gatinais Riche	Lavanda	85.49	30.9123	264.269
91055	91	Essonne	Hurepoix	Lavanda	7.18	30.9123	22.195
91339	91	Essonne	Gatinais Riche	Lavanda	59.1	30.9123	182.692
91342	91	Essonne	Beauce	Lavanda	26.52	30.9123	81.9794
77061	77	Seine-et-Marne	Vallees de la Marne et du Morin	Lettuce	2.01	210	42.21
77064	77	Seine-et-Marne	Pays de Biere et Foret de Fontaine	Lettuce	267.29	210	5613.09
78332	78	Yvelines	Vallee de la Seine	Lettuce	1.39	210	29.19
78333	78	Yvelines	Ceinture de Paris	Lettuce	69.39	210	1457.19
91337	91	Essonne	Brie Francaise	Lettuce	14.13	210	296.73
91342	91	Essonne	Beauce	Lupine	20.24	25	50.6
95330	95	Val-d'Oise	Vexin	Lupine	9.22	25	23.05
28334	28	Eure-et-Loir	Drouais	Lentil	1.53	22	3.366
28342	28	Eure-et-Loir	Beauce	Lentil	7.67	22	16.874
45339	45	Loiret	Gatinais Riche	Lentil	3.13	22	6.886
77057	77	Seine-et-Marne	Brie Boisee	Lentil	8.65	10.6	9.169
77058	77	Seine-et-Marne	Brie Centrale	Lentil	6.61	10.6	7.0066
77059	77	Seine-et-Marne	Montois	Lentil	3.1	10.6	3.286
77061	77	Seine-et-Marne	Vallees de la Marne et du Morin	Lentil	57.56	10.6	61.0136
77062	77	Seine-et-Marne	Brie Humide	Lentil	8.28	10.6	8.7768
77064	77	Seine-et-Marne	Pays de Biere et Foret de Fontaine	Lentil	3.86	10.6	4.0916
77320	77	Seine-et-Marne	Bassee et Basse-Yonne	Lentil	19.12	10.6	20.2672
77335	77	Seine-et-Marne	Brie Champennoise	Lentil	22.79	10.6	24.1574
77336	77	Seine-et-Marne	Tardenois	Lentil	13.25	10.6	14.045
77337	77	Seine-et-Marne	Brie Francaise	Lentil	42.22	10.6	44.7532
77338	77	Seine-et-Marne	Gatinais Pauvre	Lentil	31.02	10.6	32.8812
77339	77	Seine-et-Marne	Gatinais Riche	Lentil	69.89	10.6	74.0834
78053	78	Yvelines	Plaine de Versailles	Lentil	99.97	10.7	106.968
78054	78	Yvelines	Yvelines	Lentil	29.5	10.7	31.565
78332	78	Yvelines	Vallee de la Seine	Lentil	17.4	10.7	18.618
78334	78	Yvelines	Drouais	Lentil	40.54	10.7	43.3778
78342	78	Yvelines	Beauce	Lentil	26.04	10.7	27.8628
89317	89	Yonne	Champagne Crayeuse	Lentil	5.49	3	1.647
91055	91	Essonne	Hurepoix	Lentil	34.45	2.4	8.268
91333	91	Essonne	Ceinture de Paris	Lentil	6	2.4	1.44
91337	91	Essonne	Brie Francaise	Lentil	50.87	2.4	12.2088
91339	91	Essonne	Gatinais Riche	Lentil	99.37	2.4	23.8488
91342	91	Essonne	Beauce	Lentil	86.05	2.4	20.652
95330	95	Val-d'Oise	Vexin	Lentil	18.78	7.1	13.3338
77060	77	Seine-et-Marne	Brie Est	FodderLupine	0.88	87	7.656
2336	02	Aisne	Tardenois	Linen	15.99	40	63.96
27080	27	Eure	Plateau de Madrie	Linen	11.6	52	60.32
51335	51	Marne	Brie Champennoise	Linen	18.43	53	97.679
60330	60	Oise	Vexin	Linen	56.09	45	252.405
77045	77	Seine-et-Marne	Butte de Dammartin	Linen	13.13	38	49.894
77057	77	Seine-et-Marne	Brie Boisee	Linen	114.58	38	435.404
77058	77	Seine-et-Marne	Brie Centrale	Linen	321.5	38	1221.7
77059	77	Seine-et-Marne	Montois	Linen	47.44	38	180.272
77060	77	Seine-et-Marne	Brie Est	Linen	521.67	38	1982.35
77061	77	Seine-et-Marne	Vallees de la Marne et du Morin	Linen	338.01	38	1284.44
77329	77	Seine-et-Marne	Goele et Multien	Linen	111.18	38	422.484
77335	77	Seine-et-Marne	Brie Champennoise	Linen	9.65	38	36.67
77336	77	Seine-et-Marne	Tardenois	Linen	777.07	38	2952.87
77337	77	Seine-et-Marne	Brie Francaise	Linen	525.65	38	1997.47
78053	78	Yvelines	Plaine de Versailles	Linen	187.09	38	710.942
78054	78	Yvelines	Yvelines	Linen	17.29	38	65.702
78332	78	Yvelines	Vallee de la Seine	Linen	19.42	38	73.796
78333	78	Yvelines	Ceinture de Paris	Linen	18.42	38	69.996
78334	78	Yvelines	Drouais	Linen	323.65	38	1229.87
91342	91	Essonne	Beauce	Linen	10	38	38
95329	95	Val-d'Oise	Vieille France	Linen	62.49	38	237.462
95330	95	Val-d'Oise	Vexin	Linen	705.09	38	2679.34
95332	95	Val-d'Oise	Vallee de la Seine	Linen	10.29	38	39.102
27080	27	Eure	Plateau de Madrie	Flax	0.87	30	2.61
77060	77	Seine-et-Marne	Brie Est	Flax	11.73	18	21.114
77061	77	Seine-et-Marne	Vallees de la Marne et du Morin	Flax	70.57	18	127.026
77320	77	Seine-et-Marne	Bassee et Basse-Yonne	Flax	16.41	18	29.538
77335	77	Seine-et-Marne	Brie Champennoise	Flax	10.73	18	19.314
77336	77	Seine-et-Marne	Tardenois	Flax	5.9	18	10.62
78054	78	Yvelines	Yvelines	Flax	21.35	18	38.43
78334	78	Yvelines	Drouais	Flax	14.26	18	25.668
78342	78	Yvelines	Beauce	Flax	35.17	18	63.306
91342	91	Essonne	Beauce	Flax	28.17	18	50.706
45339	45	Loiret	Gatinais Riche	Flax	12.93	21	27.153
77061	77	Seine-et-Marne	Vallees de la Marne et du Morin	Flax	2.29	18	4.122
77062	77	Seine-et-Marne	Brie Humide	Flax	0.34	18	0.612
77064	77	Seine-et-Marne	Pays de Biere et Foret de Fontaine	Flax	3.64	18	6.552
77320	77	Seine-et-Marne	Bassee et Basse-Yonne	Flax	6.11	18	10.998
77329	77	Seine-et-Marne	Goele et Multien	Flax	6.57	18	11.826
77335	77	Seine-et-Marne	Brie Champennoise	Flax	32.6	18	58.68
77338	77	Seine-et-Marne	Gatinais Pauvre	Flax	0.27	18	0.486
77339	77	Seine-et-Marne	Gatinais Riche	Flax	27.34	18	49.212
78053	78	Yvelines	Plaine de Versailles	Flax	8.27	18	14.886
78054	78	Yvelines	Yvelines	Flax	44.72	18	80.496
78334	78	Yvelines	Drouais	Flax	7.14	18	12.852
91055	91	Essonne	Hurepoix	Flax	48.46	18	87.228
91339	91	Essonne	Gatinais Riche	Flax	51.08	18	91.944
91342	91	Essonne	Beauce	Flax	114.51	18	206.118
95330	95	Val-d'Oise	Vexin	Flax	101.55	18	182.79
95333	95	Val-d'Oise	Ceinture de Paris	Flax	22.56	18	40.608
77056	77	Seine-et-Marne	Orxois	TemporaryGrassland	7.22	87	62.814
77336	77	Seine-et-Marne	Tardenois	TemporaryGrassland	0.79	87	6.873
78054	78	Yvelines	Yvelines	TemporaryGrassland	8.56	84	71.904
2336	02	Aisne	Tardenois	Alfalfa	28.05	96.5	270.683
10335	10	Aube	Brie Champennoise	Alfalfa	7.79	106.3	82.8077
28334	28	Eure-et-Loir	Drouais	Alfalfa	6.57	79.6	52.2972
45342	45	Loiret	Beauce	Alfalfa	34.12	66.8	227.922
77057	77	Seine-et-Marne	Brie Boisee	Alfalfa	30.86	87	268.482
77058	77	Seine-et-Marne	Brie Centrale	Alfalfa	44.98	87	391.326
77059	77	Seine-et-Marne	Montois	Alfalfa	101.07	87	879.309
77060	77	Seine-et-Marne	Brie Est	Alfalfa	292.53	87	2545.01
77061	77	Seine-et-Marne	Vallees de la Marne et du Morin	Alfalfa	171.11	87	1488.66
77062	77	Seine-et-Marne	Brie Humide	Alfalfa	64.51	87	561.237
77064	77	Seine-et-Marne	Pays de Biere et Foret de Fontaine	Alfalfa	403.28	87	3508.54
77320	77	Seine-et-Marne	Bassee et Basse-Yonne	Alfalfa	142.85	87	1242.79
77335	77	Seine-et-Marne	Brie Champennoise	Alfalfa	123.29	87	1072.62
77336	77	Seine-et-Marne	Tardenois	Alfalfa	247.19	87	2150.55
77337	77	Seine-et-Marne	Brie Francaise	Alfalfa	61.7	87	536.79
77338	77	Seine-et-Marne	Gatinais Pauvre	Alfalfa	444.22	87	3864.71
77339	77	Seine-et-Marne	Gatinais Riche	Alfalfa	91.77	87	798.399
78053	78	Yvelines	Plaine de Versailles	Alfalfa	23.67	84	198.828
78054	78	Yvelines	Yvelines	Alfalfa	426.45	84	3582.18
78055	78	Yvelines	Hurepoix	Alfalfa	92.58	84	777.672
78332	78	Yvelines	Vallee de la Seine	Alfalfa	129.47	84	1087.55
78334	78	Yvelines	Drouais	Alfalfa	216.18	84	1815.91
78342	78	Yvelines	Beauce	Alfalfa	119.3	84	1002.12
91055	91	Essonne	Hurepoix	Alfalfa	709.79	82	5820.28
91333	91	Essonne	Ceinture de Paris	Alfalfa	73.89	82	605.898
91337	91	Essonne	Brie Francaise	Alfalfa	143.66	82	1178.01
91339	91	Essonne	Gatinais Riche	Alfalfa	716.07	82	5871.77
91342	91	Essonne	Beauce	Alfalfa	805.67	82	6606.49
94333	94	Val-de-Marne	Ceinture de Paris	Alfalfa	0.02	65.9347	0.131869
95330	95	Val-d'Oise	Vexin	Alfalfa	179.06	87	1557.82
2336	02	Aisne	Tardenois	Alfalfa	42.73	96.5	412.344
27080	27	Eure	Plateau de Madrie	Alfalfa	0.69	66	4.554
28334	28	Eure-et-Loir	Drouais	Alfalfa	4.75	79.6	37.81
28342	28	Eure-et-Loir	Beauce	Alfalfa	4.11	79.6	32.7156
45339	45	Loiret	Gatinais Riche	Alfalfa	1.81	66.8	12.0908
60329	60	Oise	Valois et Multien	Alfalfa	5.19	83.8	43.4922
77045	77	Seine-et-Marne	Butte de Dammartin	Alfalfa	7.22	87	62.814
77056	77	Seine-et-Marne	Orxois	Alfalfa	36.04	87	313.548
77057	77	Seine-et-Marne	Brie Boisee	Alfalfa	128.09	87	1114.38
77058	77	Seine-et-Marne	Brie Centrale	Alfalfa	188.62	87	1640.99
77059	77	Seine-et-Marne	Montois	Alfalfa	138.24	87	1202.69
77060	77	Seine-et-Marne	Brie Est	Alfalfa	124.16	87	1080.19
77061	77	Seine-et-Marne	Vallees de la Marne et du Morin	Alfalfa	206.11	87	1793.16
77062	77	Seine-et-Marne	Brie Humide	Alfalfa	88.05	87	766.035
77064	77	Seine-et-Marne	Pays de Biere et Foret de Fontaine	Alfalfa	54.02	87	469.974
77320	77	Seine-et-Marne	Bassee et Basse-Yonne	Alfalfa	141.29	87	1229.22
77329	77	Seine-et-Marne	Goele et Multien	Alfalfa	100.71	87	876.177
77335	77	Seine-et-Marne	Brie Champennoise	Alfalfa	24.84	87	216.108
77336	77	Seine-et-Marne	Tardenois	Alfalfa	206.7	87	1798.29
77337	77	Seine-et-Marne	Brie Francaise	Alfalfa	173.42	87	1508.75
77338	77	Seine-et-Marne	Gatinais Pauvre	Alfalfa	73.65	87	640.755
77339	77	Seine-et-Marne	Gatinais Riche	Alfalfa	66.5	87	578.55
78053	78	Yvelines	Plaine de Versailles	Alfalfa	174.7	84	1467.48
78054	78	Yvelines	Yvelines	Alfalfa	338.66	84	2844.74
78055	78	Yvelines	Hurepoix	Alfalfa	31.02	84	260.568
78330	78	Yvelines	Vexin	Alfalfa	9.46	84	79.464
78332	78	Yvelines	Vallee de la Seine	Alfalfa	204.47	84	1717.55
78333	78	Yvelines	Ceinture de Paris	Alfalfa	18.82	84	158.088
78334	78	Yvelines	Drouais	Alfalfa	79.75	84	669.9
78342	78	Yvelines	Beauce	Alfalfa	0.05	84	0.42
91055	91	Essonne	Hurepoix	Alfalfa	139.28	82	1142.1
91333	91	Essonne	Ceinture de Paris	Alfalfa	46.69	82	382.858
91337	91	Essonne	Brie Francaise	Alfalfa	7.4	82	60.68
91339	91	Essonne	Gatinais Riche	Alfalfa	22.68	82	185.976
91342	91	Essonne	Beauce	Alfalfa	82.32	82	675.024
94333	94	Val-de-Marne	Ceinture de Paris	Alfalfa	0.7	65.9347	4.61543
95329	95	Val-d'Oise	Vieille France	Alfalfa	23.42	87	203.754
95330	95	Val-d'Oise	Vexin	Alfalfa	109.2	87	950.04
95332	95	Val-d'Oise	Vallee de la Seine	Alfalfa	7.21	87	62.727
95333	95	Val-d'Oise	Ceinture de Paris	Alfalfa	32.3	87	281.01
10335	10	Aube	Brie Champennoise	CerealMix	2.84	72.4	20.5616
60330	60	Oise	Vexin	CerealMix	0.62	82.2	5.0964
77057	77	Seine-et-Marne	Brie Boisee	CerealMix	2.08	80.7	16.7856
77058	77	Seine-et-Marne	Brie Centrale	CerealMix	19.46	80.7	157.042
77059	77	Seine-et-Marne	Montois	CerealMix	6.59	80.7	53.1813
77060	77	Seine-et-Marne	Brie Est	CerealMix	64.26	80.7	518.578
77061	77	Seine-et-Marne	Vallees de la Marne et du Morin	CerealMix	25.87	80.7	208.771
77062	77	Seine-et-Marne	Brie Humide	CerealMix	0.61	80.7	4.9227
77064	77	Seine-et-Marne	Pays de Biere et Foret de Fontaine	CerealMix	1.38	80.7	11.1366
77320	77	Seine-et-Marne	Bassee et Basse-Yonne	CerealMix	30.53	80.7	246.377
77329	77	Seine-et-Marne	Goele et Multien	CerealMix	1.12	80.7	9.0384
77335	77	Seine-et-Marne	Brie Champennoise	CerealMix	11.09	80.7	89.4963
77336	77	Seine-et-Marne	Tardenois	CerealMix	3.66	80.7	29.5362
77337	77	Seine-et-Marne	Brie Francaise	CerealMix	7.42	80.7	59.8794
77338	77	Seine-et-Marne	Gatinais Pauvre	CerealMix	21.1	80.7	170.277
77339	77	Seine-et-Marne	Gatinais Riche	CerealMix	19.69	80.7	158.898
78053	78	Yvelines	Plaine de Versailles	CerealMix	24.96	78.3	195.437
78054	78	Yvelines	Yvelines	CerealMix	25.46	78.3	199.352
78332	78	Yvelines	Vallee de la Seine	CerealMix	41.68	78.3	326.354
78334	78	Yvelines	Drouais	CerealMix	44.82	78.3	350.941
78342	78	Yvelines	Beauce	CerealMix	32.81	78.3	256.902
91055	91	Essonne	Hurepoix	CerealMix	5.79	79	45.741
91339	91	Essonne	Gatinais Riche	CerealMix	0.66	79	5.214
91342	91	Essonne	Beauce	CerealMix	1.41	79	11.139
95329	95	Val-d'Oise	Vieille France	CerealMix	6.55	81.4	53.317
95330	95	Val-d'Oise	Vexin	CerealMix	19.35	81.4	157.509
91339	91	Essonne	Gatinais Riche	TemporaryGrassland	1.59	82	13.038
77058	77	Seine-et-Marne	Brie Centrale	SweetCorn	33.39	32.47	108.417
77060	77	Seine-et-Marne	Brie Est	SweetCorn	5.04	32.47	16.3649
77062	77	Seine-et-Marne	Brie Humide	SweetCorn	5.72	32.47	18.5728
77320	77	Seine-et-Marne	Bassee et Basse-Yonne	SweetCorn	0.23	32.47	0.74681
77336	77	Seine-et-Marne	Tardenois	SweetCorn	26.54	32.47	86.1754
78333	78	Yvelines	Ceinture de Paris	SweetCorn	2.33	48.33	11.2609
95329	95	Val-d'Oise	Vieille France	SweetCorn	9.87	51.61	50.9391
2336	02	Aisne	Tardenois	MaizeFodder	28.63	142	406.546
51335	51	Marne	Brie Champennoise	MaizeFodder	2.84	110	31.24
60329	60	Oise	Valois et Multien	MaizeFodder	18.86	143	269.698
77045	77	Seine-et-Marne	Butte de Dammartin	MaizeFodder	32.82	106.3	348.877
77056	77	Seine-et-Marne	Orxois	MaizeFodder	64.16	106.3	682.021
77057	77	Seine-et-Marne	Brie Boisee	MaizeFodder	180.83	106.3	1922.22
77058	77	Seine-et-Marne	Brie Centrale	MaizeFodder	72.21	106.3	767.592
77059	77	Seine-et-Marne	Montois	MaizeFodder	73.14	106.3	777.478
77060	77	Seine-et-Marne	Brie Est	MaizeFodder	96.93	106.3	1030.37
77061	77	Seine-et-Marne	Vallees de la Marne et du Morin	MaizeFodder	216.04	106.3	2296.51
77062	77	Seine-et-Marne	Brie Humide	MaizeFodder	59.51	106.3	632.591
77320	77	Seine-et-Marne	Bassee et Basse-Yonne	MaizeFodder	34.76	106.3	369.499
77329	77	Seine-et-Marne	Goele et Multien	MaizeFodder	107.64	106.3	1144.21
77336	77	Seine-et-Marne	Tardenois	MaizeFodder	290.91	106.3	3092.37
77338	77	Seine-et-Marne	Gatinais Pauvre	MaizeFodder	10.72	106.3	113.954
78053	78	Yvelines	Plaine de Versailles	MaizeFodder	94.81	89.3	846.653
78054	78	Yvelines	Yvelines	MaizeFodder	10.49	89.3	93.6757
78055	78	Yvelines	Hurepoix	MaizeFodder	13.38	89.3	119.483
78332	78	Yvelines	Vallee de la Seine	MaizeFodder	42.77	89.3	381.936
78334	78	Yvelines	Drouais	MaizeFodder	26.69	89.3	238.342
91055	91	Essonne	Hurepoix	MaizeFodder	155.4	89	1383.06
91333	91	Essonne	Ceinture de Paris	MaizeFodder	16.67	89	148.363
91342	91	Essonne	Beauce	MaizeFodder	14.7	89	130.83
95330	95	Val-d'Oise	Vexin	MaizeFodder	129.62	89	1153.62
2329	02	Aisne	Valois	Maize	1.66	71.4	11.8524
2329	02	Aisne	Valois	MaizeIrrigated	1.66	100	16.6						2.94897e+07	4.63489e+06	1.99234e+08
2336	02	Aisne	Tardenois	Maize	118.06	71.4	842.948
2336	02	Aisne	Tardenois	MaizeIrrigated	118.06	100	1180.6
10019	10	Aube	Vallee du Nogentais	Maize	6.41	67.4	43.2034
10019	10	Aube	Vallee du Nogentais	MaizeIrrigated	6.41	90	57.69
10335	10	Aube	Brie Champennoise	Maize	74.89	67.4	504.759
10335	10	Aube	Brie Champennoise	MaizeIrrigated	74.89	90	674.01
27080	27	Eure	Plateau de Madrie	Maize	23.91	67.2	160.675
27080	27	Eure	Plateau de Madrie	MaizeIrrigated	23.91	100	239.1
27330	27	Eure	Vexin	Maize	25.62	67.2	172.166
27330	27	Eure	Vexin	MaizeIrrigated	25.62	100	256.2
27332	27	Eure	Vallee de la Seine	Maize	15.54	67.2	104.429
27332	27	Eure	Vallee de la Seine	MaizeIrrigated	15.54	100	155.4
28334	28	Eure-et-Loir	Drouais	Maize	10.76	104.2	112.119
28334	28	Eure-et-Loir	Drouais	MaizeIrrigated	10.76	120	129.12
28342	28	Eure-et-Loir	Beauce	Maize	111.6	104.2	1162.87
28342	28	Eure-et-Loir	Beauce	MaizeIrrigated	111.6	120	1339.2
45339	45	Loiret	Gatinais Riche	Maize	71.43	95.7	683.585
45339	45	Loiret	Gatinais Riche	MaizeIrrigated	71.43	108	771.444
45342	45	Loiret	Beauce	Maize	23.98	95.7	229.489
45342	45	Loiret	Beauce	MaizeIrrigated	23.98	108	258.984
51335	51	Marne	Brie Champennoise	Maize	122.42	75.6	925.495
51335	51	Marne	Brie Champennoise	MaizeIrrigated	122.42	90	1101.78
60041	60	Oise	Pays de Thelle	Maize	88.59	70.7	626.331
60041	60	Oise	Pays de Thelle	MaizeIrrigated	88.59	100.1	886.786
60329	60	Oise	Valois et Multien	Maize	121.49	70.7	858.934
60329	60	Oise	Valois et Multien	MaizeIrrigated	121.49	100.1	1216.11
60330	60	Oise	Vexin	Maize	179.89	70.7	1271.82
60330	60	Oise	Vexin	MaizeIrrigated	179.89	100.1	1800.7
77045	77	Seine-et-Marne	Butte de Dammartin	Maize	364.5	86.5	3152.93
77045	77	Seine-et-Marne	Butte de Dammartin	MaizeIrrigated	364.5	115	4191.75
77056	77	Seine-et-Marne	Orxois	Maize	467.69	86.5	4045.52
77056	77	Seine-et-Marne	Orxois	MaizeIrrigated	467.69	115	5378.43
77057	77	Seine-et-Marne	Brie Boisee	Maize	2121.42	86.5	18350.3
77057	77	Seine-et-Marne	Brie Boisee	MaizeIrrigated	2121.42	115	24396.3
77058	77	Seine-et-Marne	Brie Centrale	Maize	4221.58	86.5	36516.7
77058	77	Seine-et-Marne	Brie Centrale	MaizeIrrigated	4221.58	115	48548.2
77059	77	Seine-et-Marne	Montois	Maize	761.99	86.5	6591.21
77059	77	Seine-et-Marne	Montois	MaizeIrrigated	761.99	115	8762.89
77060	77	Seine-et-Marne	Brie Est	Maize	2769.99	86.5	23960.4
77060	77	Seine-et-Marne	Brie Est	MaizeIrrigated	2769.99	115	31854.9
77061	77	Seine-et-Marne	Vallees de la Marne et du Morin	Maize	4381.5	86.5	37900
77061	77	Seine-et-Marne	Vallees de la Marne et du Morin	MaizeIrrigated	4381.5	115	50387.2
77062	77	Seine-et-Marne	Brie Humide	Maize	1409.82	86.5	12194.9
77062	77	Seine-et-Marne	Brie Humide	MaizeIrrigated	1409.82	115	16212.9
77064	77	Seine-et-Marne	Pays de Biere et Foret de Fontaine	Maize	263.99	86.5	2283.51
77064	77	Seine-et-Marne	Pays de Biere et Foret de Fontaine	MaizeIrrigated	263.99	115	3035.89
77320	77	Seine-et-Marne	Bassee et Basse-Yonne	Maize	974.78	86.5	8431.85
77320	77	Seine-et-Marne	Bassee et Basse-Yonne	MaizeIrrigated	974.78	115	11210
77329	77	Seine-et-Marne	Goele et Multien	Maize	2709	86.5	23432.8
77329	77	Seine-et-Marne	Goele et Multien	MaizeIrrigated	2709	115	31153.5
77335	77	Seine-et-Marne	Brie Champennoise	Maize	1720.58	86.5	14883
77335	77	Seine-et-Marne	Brie Champennoise	MaizeIrrigated	1720.58	115	19786.7
77336	77	Seine-et-Marne	Tardenois	Maize	4638.47	86.5	40122.8
77336	77	Seine-et-Marne	Tardenois	MaizeIrrigated	4638.47	115	53342.4
77337	77	Seine-et-Marne	Brie Francaise	Maize	2665.72	86.5	23058.5
77337	77	Seine-et-Marne	Brie Francaise	MaizeIrrigated	2665.72	115	30655.8
77338	77	Seine-et-Marne	Gatinais Pauvre	Maize	703.55	86.5	6085.71
77338	77	Seine-et-Marne	Gatinais Pauvre	MaizeIrrigated	703.55	115	8090.82
77339	77	Seine-et-Marne	Gatinais Riche	Maize	692.75	86.5	5992.29
77339	77	Seine-et-Marne	Gatinais Riche	MaizeIrrigated	692.75	115	7966.62
78053	78	Yvelines	Plaine de Versailles	Maize	1948.56	71.7	13971.2
78053	78	Yvelines	Plaine de Versailles	MaizeIrrigated	1948.56	110	21434.2
78054	78	Yvelines	Yvelines	Maize	1064.09	71.7	7629.53
78054	78	Yvelines	Yvelines	MaizeIrrigated	1064.09	110	11705
78055	78	Yvelines	Hurepoix	Maize	94.1	71.7	674.697
78055	78	Yvelines	Hurepoix	MaizeIrrigated	94.1	110	1035.1
78330	78	Yvelines	Vexin	Maize	241.93	71.7	1734.64
78330	78	Yvelines	Vexin	MaizeIrrigated	241.93	110	2661.23
78332	78	Yvelines	Vallee de la Seine	Maize	582.31	71.7	4175.16
78332	78	Yvelines	Vallee de la Seine	MaizeIrrigated	582.31	110	6405.41
78333	78	Yvelines	Ceinture de Paris	Maize	218.19	71.7	1564.42
78333	78	Yvelines	Ceinture de Paris	MaizeIrrigated	218.19	110	2400.09
78334	78	Yvelines	Drouais	Maize	864.35	71.7	6197.39
78334	78	Yvelines	Drouais	MaizeIrrigated	864.35	110	9507.85
78342	78	Yvelines	Beauce	Maize	179.85	71.7	1289.52
78342	78	Yvelines	Beauce	MaizeIrrigated	179.85	110	1978.35
89320	89	Yonne	Bassee et Basse-Yonne	Maize	1.18	77.3	9.1214
89320	89	Yonne	Bassee et Basse-Yonne	MaizeIrrigated	1.18	101	11.918
91055	91	Essonne	Hurepoix	Maize	1608.11	87.9	14135.3
91055	91	Essonne	Hurepoix	MaizeIrrigated	1608.11	117	18814.9
91333	91	Essonne	Ceinture de Paris	Maize	557.96	87.9	4904.47
91333	91	Essonne	Ceinture de Paris	MaizeIrrigated	557.96	117	6528.13
91337	91	Essonne	Brie Francaise	Maize	344.14	87.9	3024.99
91337	91	Essonne	Brie Francaise	MaizeIrrigated	344.14	117	4026.44
91339	91	Essonne	Gatinais Riche	Maize	416	87.9	3656.64
91339	91	Essonne	Gatinais Riche	MaizeIrrigated	416	117	4867.2
91342	91	Essonne	Beauce	Maize	702.19	87.9	6172.25
91342	91	Essonne	Beauce	MaizeIrrigated	702.19	117	8215.62
93329	93	Seine-Saint-Denis	Vieille France	Maize	42.49	71	301.679
93329	93	Seine-Saint-Denis	Vieille France	MaizeIrrigated	42.49	93.84	398.726
93333	93	Seine-Saint-Denis	Ceinture de Paris	Maize	26.56	71	188.576
93333	93	Seine-Saint-Denis	Ceinture de Paris	MaizeIrrigated	26.56	93.84	249.239
94333	94	Val-de-Marne	Ceinture de Paris	Maize	65.59	85	557.515
94333	94	Val-de-Marne	Ceinture de Paris	MaizeIrrigated	65.59	93.84	615.497
95329	95	Val-d'Oise	Vieille France	Maize	2484.65	71	17641
95329	95	Val-d'Oise	Vieille France	MaizeIrrigated	2484.65	93.84	23316
95330	95	Val-d'Oise	Vexin	Maize	2794.26	71	19839.2
95330	95	Val-d'Oise	Vexin	MaizeIrrigated	2794.26	93.84	26221.3
95332	95	Val-d'Oise	Vallee de la Seine	Maize	0.21	71	1.491
95332	95	Val-d'Oise	Vallee de la Seine	MaizeIrrigated	0.21	93.84	1.97064
95333	95	Val-d'Oise	Ceinture de Paris	Maize	1686.06	71	11971
95333	95	Val-d'Oise	Ceinture de Paris	MaizeIrrigated	1686.06	93.84	15822
10019	10	Aube	Vallee du Nogentais	PoliphytedGrassland	2.42	60	14.52
28334	28	Eure-et-Loir	Drouais	PoliphytedGrassland	11.41	86.8	99.0388
60329	60	Oise	Valois et Multien	PoliphytedGrassland	13.58	56.7	76.9986
77057	77	Seine-et-Marne	Brie Boisee	PoliphytedGrassland	27.65	70	193.55
77058	77	Seine-et-Marne	Brie Centrale	PoliphytedGrassland	8.48	70	59.36
77060	77	Seine-et-Marne	Brie Est	PoliphytedGrassland	18.58	70	130.06
77061	77	Seine-et-Marne	Vallees de la Marne et du Morin	PoliphytedGrassland	1.54	70	10.78
77064	77	Seine-et-Marne	Pays de Biere et Foret de Fontaine	PoliphytedGrassland	21.71	70	151.97
77320	77	Seine-et-Marne	Bassee et Basse-Yonne	PoliphytedGrassland	32.96	70	230.72
77329	77	Seine-et-Marne	Goele et Multien	PoliphytedGrassland	28.73	70	201.11
77335	77	Seine-et-Marne	Brie Champennoise	PoliphytedGrassland	6.06	70	42.42
77336	77	Seine-et-Marne	Tardenois	PoliphytedGrassland	4	70	28
77338	77	Seine-et-Marne	Gatinais Pauvre	PoliphytedGrassland	3.71	70	25.97
77339	77	Seine-et-Marne	Gatinais Riche	PoliphytedGrassland	4.51	70	31.57
78053	78	Yvelines	Plaine de Versailles	PoliphytedGrassland	1.19	69	8.211
78054	78	Yvelines	Yvelines	PoliphytedGrassland	26.14	69	180.366
78332	78	Yvelines	Vallee de la Seine	PoliphytedGrassland	15.02	69	103.638
78334	78	Yvelines	Drouais	PoliphytedGrassland	59.11	69	407.859
91055	91	Essonne	Hurepoix	PoliphytedGrassland	26.76	69	184.644
95329	95	Val-d'Oise	Vieille France	PoliphytedGrassland	1.53	69	10.557
95330	95	Val-d'Oise	Vexin	PoliphytedGrassland	38.22	69	263.718
28334	28	Eure-et-Loir	Drouais	PoliphytedGrassland	6.99	83.7	58.5063
51335	51	Marne	Brie Champennoise	PoliphytedGrassland	10.17	104.2	105.971
77058	77	Seine-et-Marne	Brie Centrale	PoliphytedGrassland	3.02	77.5	23.405
77059	77	Seine-et-Marne	Montois	PoliphytedGrassland	14.06	77.5	108.965
77060	77	Seine-et-Marne	Brie Est	PoliphytedGrassland	3.47	77.5	26.8925
77061	77	Seine-et-Marne	Vallees de la Marne et du Morin	PoliphytedGrassland	1.88	77.5	14.57
77062	77	Seine-et-Marne	Brie Humide	PoliphytedGrassland	0.67	77.5	5.1925
77064	77	Seine-et-Marne	Pays de Biere et Foret de Fontaine	PoliphytedGrassland	16.21	77.5	125.628
77320	77	Seine-et-Marne	Bassee et Basse-Yonne	PoliphytedGrassland	26.35	77.5	204.213
77335	77	Seine-et-Marne	Brie Champennoise	PoliphytedGrassland	6.59	77.5	51.0725
77338	77	Seine-et-Marne	Gatinais Pauvre	PoliphytedGrassland	4.19	77.5	32.4725
78054	78	Yvelines	Yvelines	PoliphytedGrassland	41.73	75.4	314.644
78330	78	Yvelines	Vexin	PoliphytedGrassland	2.82	75.4	21.2628
78332	78	Yvelines	Vallee de la Seine	PoliphytedGrassland	10.14	75.4	76.4556
78333	78	Yvelines	Ceinture de Paris	PoliphytedGrassland	11.06	75.4	83.3924
78334	78	Yvelines	Drouais	PoliphytedGrassland	6.37	75.4	48.0298
91055	91	Essonne	Hurepoix	PoliphytedGrassland	8.84	78	68.952
91339	91	Essonne	Gatinais Riche	PoliphytedGrassland	1.41	78	10.998
95329	95	Val-d'Oise	Vieille France	PoliphytedGrassland	12.11	73.2	88.6452
95330	95	Val-d'Oise	Vexin	PoliphytedGrassland	6.39	73.2	46.7748
95333	95	Val-d'Oise	Ceinture de Paris	PoliphytedGrassland	18.98	73.2	138.934
28342	28	Eure-et-Loir	Beauce	PoliphytedGrassland	1	86.8	8.68
51335	51	Marne	Brie Champennoise	PoliphytedGrassland	0.1	57	0.57
77045	77	Seine-et-Marne	Butte de Dammartin	PoliphytedGrassland	7.01	70	49.07
77056	77	Seine-et-Marne	Orxois	PoliphytedGrassland	6.38	70	44.66
77057	77	Seine-et-Marne	Brie Boisee	PoliphytedGrassland	73.93	70	517.51
77058	77	Seine-et-Marne	Brie Centrale	PoliphytedGrassland	119.44	70	836.08
77059	77	Seine-et-Marne	Montois	PoliphytedGrassland	101.95	70	713.65
77060	77	Seine-et-Marne	Brie Est	PoliphytedGrassland	59.38	70	415.66
77061	77	Seine-et-Marne	Vallees de la Marne et du Morin	PoliphytedGrassland	292.14	70	2044.98
77062	77	Seine-et-Marne	Brie Humide	PoliphytedGrassland	160.82	70	1125.74
77064	77	Seine-et-Marne	Pays de Biere et Foret de Fontaine	PoliphytedGrassland	131.13	70	917.91
77320	77	Seine-et-Marne	Bassee et Basse-Yonne	PoliphytedGrassland	137.23	70	960.61
77329	77	Seine-et-Marne	Goele et Multien	PoliphytedGrassland	79.45	70	556.15
77335	77	Seine-et-Marne	Brie Champennoise	PoliphytedGrassland	53.26	70	372.82
77336	77	Seine-et-Marne	Tardenois	PoliphytedGrassland	145.1	70	1015.7
77337	77	Seine-et-Marne	Brie Francaise	PoliphytedGrassland	48.28	70	337.96
77338	77	Seine-et-Marne	Gatinais Pauvre	PoliphytedGrassland	159.42	70	1115.94
77339	77	Seine-et-Marne	Gatinais Riche	PoliphytedGrassland	204.52	70	1431.64
78053	78	Yvelines	Plaine de Versailles	PoliphytedGrassland	28.93	69	199.617
78054	78	Yvelines	Yvelines	PoliphytedGrassland	49.32	69	340.308
78332	78	Yvelines	Vallee de la Seine	PoliphytedGrassland	14.21	69	98.049
91055	91	Essonne	Hurepoix	PoliphytedGrassland	14.5	69	100.05
91339	91	Essonne	Gatinais Riche	PoliphytedGrassland	31.06	69	214.314
91342	91	Essonne	Beauce	PoliphytedGrassland	8.36	69	57.684
94333	94	Val-de-Marne	Ceinture de Paris	PoliphytedGrassland	2	69	13.8
95329	95	Val-d'Oise	Vieille France	PoliphytedGrassland	9.02	69	62.238
95330	95	Val-d'Oise	Vexin	PoliphytedGrassland	9.24	69	63.756
77320	77	Seine-et-Marne	Bassee et Basse-Yonne	Condiment	1.1	61	6.71
91339	91	Essonne	Gatinais Riche	Condiment	1.11	644	71.484
91055	91	Essonne	Hurepoix	Melon	0.31	199	6.169
77320	77	Seine-et-Marne	Bassee et Basse-Yonne	Aroma	0.91	5	0.455
45339	45	Loiret	Gatinais Riche	Millet	0.79	70.9	5.6011
77335	77	Seine-et-Marne	Brie Champennoise	Millet	6.27	80.7	50.5989
77336	77	Seine-et-Marne	Tardenois	Millet	0.85	80.7	6.8595
77339	77	Seine-et-Marne	Gatinais Riche	Millet	0.79	80.7	6.3753
91339	91	Essonne	Gatinais Riche	Millet	1.37	79	10.823
91342	91	Essonne	Beauce	Millet	3.84	79	30.336
77329	77	Seine-et-Marne	Goele et Multien	TemporaryGrassland	0.28	77.5	2.17
91339	91	Essonne	Gatinais Riche	TemporaryGrassland	2.73	78	21.294
91342	91	Essonne	Beauce	TemporaryGrassland	0.45	78	3.51
77060	77	Seine-et-Marne	Brie Est	OleoMix	81.93	39.1	320.346
77335	77	Seine-et-Marne	Brie Champennoise	OleoMix	2.59	39.1	10.1269
27080	27	Eure	Plateau de Madrie	PeaMix	4.42	34	15.028
28342	28	Eure-et-Loir	Beauce	PeaMix	18.15	40	72.6
77057	77	Seine-et-Marne	Brie Boisee	PeaMix	44.52	40	178.08
77058	77	Seine-et-Marne	Brie Centrale	PeaMix	136.5	40	546
77060	77	Seine-et-Marne	Brie Est	PeaMix	106.36	40	425.44
77061	77	Seine-et-Marne	Vallees de la Marne et du Morin	PeaMix	36.98	40	147.92
77062	77	Seine-et-Marne	Brie Humide	PeaMix	58.87	40	235.48
77064	77	Seine-et-Marne	Pays de Biere et Foret de Fontaine	PeaMix	5.08	40	20.32
77320	77	Seine-et-Marne	Bassee et Basse-Yonne	PeaMix	22.63	40	90.52
77335	77	Seine-et-Marne	Brie Champennoise	PeaMix	4.74	40	18.96
77336	77	Seine-et-Marne	Tardenois	PeaMix	88.78	40	355.12
77337	77	Seine-et-Marne	Brie Francaise	PeaMix	26.53	40	106.12
77338	77	Seine-et-Marne	Gatinais Pauvre	PeaMix	31.2	40	124.8
77339	77	Seine-et-Marne	Gatinais Riche	PeaMix	5.13	40	20.52
78053	78	Yvelines	Plaine de Versailles	PeaMix	31.56	41	129.396
78054	78	Yvelines	Yvelines	PeaMix	47.64	41	195.324
78055	78	Yvelines	Hurepoix	PeaMix	11.08	41	45.428
78332	78	Yvelines	Vallee de la Seine	PeaMix	7.2	41	29.52
78334	78	Yvelines	Drouais	PeaMix	15.27	41	62.607
78342	78	Yvelines	Beauce	PeaMix	5.25	41	21.525
91055	91	Essonne	Hurepoix	PeaMix	29.7	43	127.71
91339	91	Essonne	Gatinais Riche	PeaMix	112.59	43	484.137
91342	91	Essonne	Beauce	PeaMix	93.86	43	403.598
77320	77	Seine-et-Marne	Bassee et Basse-Yonne	OtherPea	12.5	37.33	46.6625
78342	78	Yvelines	Beauce	OtherPea	16.4	33.77	55.3828
77339	77	Seine-et-Marne	Gatinais Riche	Aromatic	8.02	30.9123	24.7917
91339	91	Essonne	Gatinais Riche	Aromatic	0.2	30.9123	0.618246
28342	28	Eure-et-Loir	Beauce	Mint	3.51	80	28.08
45342	45	Loiret	Beauce	Mint	0.99	80	7.92
77057	77	Seine-et-Marne	Brie Boisee	Mint	12.47	61	76.067
77062	77	Seine-et-Marne	Brie Humide	Mint	4.19	61	25.559
77064	77	Seine-et-Marne	Pays de Biere et Foret de Fontaine	Mint	1.88	61	11.468
77329	77	Seine-et-Marne	Goele et Multien	Mint	1.96	61	11.956
77339	77	Seine-et-Marne	Gatinais Riche	Mint	24.04	61	146.644
78342	78	Yvelines	Beauce	Mint	3.51	490	171.99
91339	91	Essonne	Gatinais Riche	Mint	15.76	644	1014.94
95329	95	Val-d'Oise	Vieille France	Mint	0.31	771	23.901
95330	95	Val-d'Oise	Vexin	Mint	6.31	771	486.501
60329	60	Oise	Valois et Multien	Hazelnut	24.03	12.2315	29.3923
77045	77	Seine-et-Marne	Butte de Dammartin	Hazelnut	36.52	14.71	53.7209
77057	77	Seine-et-Marne	Brie Boisee	Hazelnut	13.14	14.71	19.3289
77058	77	Seine-et-Marne	Brie Centrale	Hazelnut	25.44	14.71	37.4222
77059	77	Seine-et-Marne	Montois	Hazelnut	12.45	14.71	18.3139
77060	77	Seine-et-Marne	Brie Est	Hazelnut	25.11	14.71	36.9368
77061	77	Seine-et-Marne	Vallees de la Marne et du Morin	Hazelnut	39.23	14.71	57.7073
77064	77	Seine-et-Marne	Pays de Biere et Foret de Fontaine	Hazelnut	0.02	14.71	0.02942
77329	77	Seine-et-Marne	Goele et Multien	Hazelnut	73.52	14.71	108.148
77335	77	Seine-et-Marne	Brie Champennoise	Hazelnut	15.25	14.71	22.4328
77337	77	Seine-et-Marne	Brie Francaise	Hazelnut	16.11	14.71	23.6978
77060	77	Seine-et-Marne	Brie Est	Walnut	8.04	28	22.512
77064	77	Seine-et-Marne	Pays de Biere et Foret de Fontaine	Walnut	0.66	28	1.848
77329	77	Seine-et-Marne	Goele et Multien	Walnut	0.22	28	0.616
77337	77	Seine-et-Marne	Brie Francaise	Walnut	0.01	28	0.028
78333	78	Yvelines	Ceinture de Paris	Walnut	0.03	28	0.084
95329	95	Val-d'Oise	Vieille France	Walnut	0.7	27.67	1.9369
78332	78	Yvelines	Vallee de la Seine	Rapeseed	3.23	42	13.566
78334	78	Yvelines	Drouais	Rapeseed	6.96	42	29.232
91342	91	Essonne	Beauce	Rapeseed	1.94	41	7.954
77061	77	Seine-et-Marne	Vallees de la Marne et du Morin	Turnip	1	702	70.2
95330	95	Val-d'Oise	Vexin	OtherOleo	1.15	40.9	4.7035
77058	77	Seine-et-Marne	Brie Centrale	OtherOleo	18.34	39.1	71.7094
77059	77	Seine-et-Marne	Montois	OtherOleo	8.53	39.1	33.3523
77335	77	Seine-et-Marne	Brie Champennoise	OtherOleo	8.07	39.1	31.5537
77338	77	Seine-et-Marne	Gatinais Pauvre	OtherOleo	0.2	39.1	0.782
77339	77	Seine-et-Marne	Gatinais Riche	OtherOleo	13.13	39.1	51.3383
91339	91	Essonne	Gatinais Riche	OtherOleo	0.77	38.2	2.9414
45339	45	Loiret	Gatinais Riche	Onion	4.77	191.97	91.5697
77057	77	Seine-et-Marne	Brie Boisee	Onion	0.25	92.48	2.312
77058	77	Seine-et-Marne	Brie Centrale	Onion	1.93	92.48	17.8486
77060	77	Seine-et-Marne	Brie Est	Onion	18.41	92.48	170.256
77061	77	Seine-et-Marne	Vallees de la Marne et du Morin	Onion	0.7	92.48	6.4736
77064	77	Seine-et-Marne	Pays de Biere et Foret de Fontaine	Onion	6.03	92.48	55.7654
77320	77	Seine-et-Marne	Bassee et Basse-Yonne	Onion	111.81	92.48	1034.02
77329	77	Seine-et-Marne	Goele et Multien	Onion	0.66	92.48	6.10368
77335	77	Seine-et-Marne	Brie Champennoise	Onion	21.06	92.48	194.763
77338	77	Seine-et-Marne	Gatinais Pauvre	Onion	13.64	92.48	126.143
77339	77	Seine-et-Marne	Gatinais Riche	Onion	56.32	92.48	520.847
78053	78	Yvelines	Plaine de Versailles	Onion	0.99	246.33	24.3867
78054	78	Yvelines	Yvelines	Onion	10.12	246.33	249.286
78332	78	Yvelines	Vallee de la Seine	Onion	4.2	246.33	103.459
78333	78	Yvelines	Ceinture de Paris	Onion	4.38	246.33	107.893
78342	78	Yvelines	Beauce	Onion	15.58	246.33	383.782
91337	91	Essonne	Brie Francaise	Onion	6.87	112.69	77.418
91339	91	Essonne	Gatinais Riche	Onion	7.16	112.69	80.686
91342	91	Essonne	Beauce	Onion	133.23	112.69	1501.37
95330	95	Val-d'Oise	Vexin	Onion	46.91	80.44	377.344
2336	02	Aisne	Tardenois	Barley	72.44	83	601.252
10335	10	Aube	Brie Champennoise	Barley	97.4	74	720.76
27080	27	Eure	Plateau de Madrie	Barley	83.96	85	713.66
27330	27	Eure	Vexin	Barley	28.67	85	243.695
28334	28	Eure-et-Loir	Drouais	Barley	86.93	82	712.826
28342	28	Eure-et-Loir	Beauce	Barley	383.49	82	3144.62
45338	45	Loiret	Gatinais Pauvre	Barley	39.91	64	255.424
45339	45	Loiret	Gatinais Riche	Barley	93.14	64	596.096
45342	45	Loiret	Beauce	Barley	97.1	64	621.44
51335	51	Marne	Brie Champennoise	Barley	145.54	84	1222.54
60041	60	Oise	Pays de Thelle	Barley	14.35	86	123.41
60329	60	Oise	Valois et Multien	Barley	119.44	86	1027.18
60330	60	Oise	Vexin	Barley	115.17	86	990.462
77045	77	Seine-et-Marne	Butte de Dammartin	Barley	243.95	76	1854.02
77056	77	Seine-et-Marne	Orxois	Barley	379.17	76	2881.69
77057	77	Seine-et-Marne	Brie Boisee	Barley	1059.23	76	8050.15
77058	77	Seine-et-Marne	Brie Centrale	Barley	2570.66	76	19537
77059	77	Seine-et-Marne	Montois	Barley	823.47	76	6258.37
77060	77	Seine-et-Marne	Brie Est	Barley	1671.9	76	12706.4
77061	77	Seine-et-Marne	Vallees de la Marne et du Morin	Barley	3065.06	76	23294.5
77062	77	Seine-et-Marne	Brie Humide	Barley	1686.26	76	12815.6
77064	77	Seine-et-Marne	Pays de Biere et Foret de Fontaine	Barley	2362.04	76	17951.5
77320	77	Seine-et-Marne	Bassee et Basse-Yonne	Barley	3241.31	76	24634
77329	77	Seine-et-Marne	Goele et Multien	Barley	2636.09	76	20034.3
77335	77	Seine-et-Marne	Brie Champennoise	Barley	2425.2	76	18431.5
77336	77	Seine-et-Marne	Tardenois	Barley	1408.99	76	10708.3
77337	77	Seine-et-Marne	Brie Francaise	Barley	1968.22	76	14958.5
77338	77	Seine-et-Marne	Gatinais Pauvre	Barley	3492.27	76	26541.3
77339	77	Seine-et-Marne	Gatinais Riche	Barley	1794.14	76	13635.5
78053	78	Yvelines	Plaine de Versailles	Barley	2191.89	76	16658.4
78054	78	Yvelines	Yvelines	Barley	2198.06	76	16705.3
78055	78	Yvelines	Hurepoix	Barley	87.43	76	664.468
78330	78	Yvelines	Vexin	Barley	458.91	76	3487.72
78332	78	Yvelines	Vallee de la Seine	Barley	1091.51	76	8295.48
78333	78	Yvelines	Ceinture de Paris	Barley	251.32	76	1910.03
78334	78	Yvelines	Drouais	Barley	1970.68	76	14977.2
78342	78	Yvelines	Beauce	Barley	681.27	76	5177.65
89317	89	Yonne	Champagne Crayeuse	Barley	71.23	59	420.257
89320	89	Yonne	Bassee et Basse-Yonne	Barley	146.93	59	866.887
89338	89	Yonne	Gatinais Pauvre	Barley	141.16	59	832.844
91055	91	Essonne	Hurepoix	Barley	1303.41	79	10296.9
91333	91	Essonne	Ceinture de Paris	Barley	194.64	79	1537.66
91337	91	Essonne	Brie Francaise	Barley	1127.5	79	8907.25
91339	91	Essonne	Gatinais Riche	Barley	1262.78	79	9975.96
91342	91	Essonne	Beauce	Barley	1780.32	79	14064.5
93329	93	Seine-Saint-Denis	Vieille France	Barley	35.11	58.5043	205.409
94333	94	Val-de-Marne	Ceinture de Paris	Barley	108.99	79	861.021
95329	95	Val-d'Oise	Vieille France	Barley	508.83	84	4274.17
95330	95	Val-d'Oise	Vexin	Barley	2393.71	84	20107.2
95332	95	Val-d'Oise	Vallee de la Seine	Barley	93.06	84	781.704
95333	95	Val-d'Oise	Ceinture de Paris	Barley	417.09	84	3503.56
2336	02	Aisne	Tardenois	Barley	65.01	58	377.058
10019	10	Aube	Vallee du Nogentais	Barley	24.98	58	144.884
10335	10	Aube	Brie Champennoise	Barley	52.35	58	303.63
27080	27	Eure	Plateau de Madrie	Barley	35.32	55	194.26
27330	27	Eure	Vexin	Barley	8.61	55	47.355
28334	28	Eure-et-Loir	Drouais	Barley	50.1	65	325.65
28342	28	Eure-et-Loir	Beauce	Barley	202.08	65	1313.52
45338	45	Loiret	Gatinais Pauvre	Barley	44.73	63	281.799
45339	45	Loiret	Gatinais Riche	Barley	453.46	63	2856.8
45342	45	Loiret	Beauce	Barley	387.29	63	2439.93
51335	51	Marne	Brie Champennoise	Barley	85.89	59	506.751
60041	60	Oise	Pays de Thelle	Barley	33.44	60	200.64
60329	60	Oise	Valois et Multien	Barley	85.73	60	514.38
60330	60	Oise	Vexin	Barley	118.55	60	711.3
77045	77	Seine-et-Marne	Butte de Dammartin	Barley	108.11	63	681.093
77056	77	Seine-et-Marne	Orxois	Barley	272.4	63	1716.12
77057	77	Seine-et-Marne	Brie Boisee	Barley	898.75	63	5662.12
77058	77	Seine-et-Marne	Brie Centrale	Barley	2348.4	63	14794.9
77059	77	Seine-et-Marne	Montois	Barley	522	63	3288.6
77060	77	Seine-et-Marne	Brie Est	Barley	582.79	63	3671.58
77061	77	Seine-et-Marne	Vallees de la Marne et du Morin	Barley	1970.11	63	12411.7
77062	77	Seine-et-Marne	Brie Humide	Barley	970.77	63	6115.85
77064	77	Seine-et-Marne	Pays de Biere et Foret de Fontaine	Barley	2048.2	63	12903.7
77320	77	Seine-et-Marne	Bassee et Basse-Yonne	Barley	1928.29	63	12148.2
77329	77	Seine-et-Marne	Goele et Multien	Barley	1219.55	63	7683.16
77335	77	Seine-et-Marne	Brie Champennoise	Barley	2038.1	63	12840
77336	77	Seine-et-Marne	Tardenois	Barley	1134.2	63	7145.46
77337	77	Seine-et-Marne	Brie Francaise	Barley	1737.39	63	10945.6
77338	77	Seine-et-Marne	Gatinais Pauvre	Barley	2707.13	63	17054.9
77339	77	Seine-et-Marne	Gatinais Riche	Barley	6447.04	63	40616.4
78053	78	Yvelines	Plaine de Versailles	Barley	1601.26	66	10568.3
78054	78	Yvelines	Yvelines	Barley	638.97	66	4217.2
78055	78	Yvelines	Hurepoix	Barley	13.66	66	90.156
78330	78	Yvelines	Vexin	Barley	208.65	66	1377.09
78332	78	Yvelines	Vallee de la Seine	Barley	797.71	66	5264.89
78333	78	Yvelines	Ceinture de Paris	Barley	284.99	66	1880.93
78334	78	Yvelines	Drouais	Barley	821.14	66	5419.52
78342	78	Yvelines	Beauce	Barley	470.32	66	3104.11
89317	89	Yonne	Champagne Crayeuse	Barley	36.79	35	128.765
89320	89	Yonne	Bassee et Basse-Yonne	Barley	21.66	35	75.81
89338	89	Yonne	Gatinais Pauvre	Barley	24.91	35	87.185
91055	91	Essonne	Hurepoix	Barley	907.09	67	6077.5
91333	91	Essonne	Ceinture de Paris	Barley	251.24	67	1683.31
91337	91	Essonne	Brie Francaise	Barley	297.82	67	1995.39
91339	91	Essonne	Gatinais Riche	Barley	2866.76	67	19207.3
91342	91	Essonne	Beauce	Barley	6751.06	67	45232.1
93329	93	Seine-Saint-Denis	Vieille France	Barley	16.91	64	108.224
94333	94	Val-de-Marne	Ceinture de Paris	Barley	25.29	67	169.443
95329	95	Val-d'Oise	Vieille France	Barley	326.97	64	2092.61
95330	95	Val-d'Oise	Vexin	Barley	1621.83	64	10379.7
95332	95	Val-d'Oise	Vallee de la Seine	Barley	55.51	64	355.264
95333	95	Val-d'Oise	Ceinture de Paris	Barley	148.12	64	947.968
78342	78	Yvelines	Beauce	Sorrel	4.92	94.27	46.3808
77320	77	Seine-et-Marne	Bassee et Basse-Yonne	Parsnip	0.51	305.68	15.5897
78332	78	Yvelines	Vallee de la Seine	Parsnip	0.4	280.5	11.22
95329	95	Val-d'Oise	Vieille France	Parsnip	0.14	298.79	4.18306
77061	77	Seine-et-Marne	Vallees de la Marne et du Morin	TemporaryGrassland	1.36	77.5	10.54
78332	78	Yvelines	Vallee de la Seine	TemporaryGrassland	0.54	75.4	4.0716
78334	78	Yvelines	Drouais	TemporaryGrassland	0.54	75.4	4.0716
77056	77	Seine-et-Marne	Orxois	ChickPea	0.53	13.7	0.7261
77058	77	Seine-et-Marne	Brie Centrale	ChickPea	2.04	13.7	2.7948
77060	77	Seine-et-Marne	Brie Est	ChickPea	4.76	13.7	6.5212
77061	77	Seine-et-Marne	Vallees de la Marne et du Morin	ChickPea	1.01	13.7	1.3837
77337	77	Seine-et-Marne	Brie Francaise	ChickPea	2.19	13.7	3.0003
77338	77	Seine-et-Marne	Gatinais Pauvre	ChickPea	3.19	13.7	4.3703
77339	77	Seine-et-Marne	Gatinais Riche	ChickPea	22.03	13.7	30.1811
78053	78	Yvelines	Plaine de Versailles	ChickPea	1.43	14.1	2.0163
78054	78	Yvelines	Yvelines	ChickPea	1.05	14.1	1.4805
78334	78	Yvelines	Drouais	ChickPea	1.9	14.1	2.679
91055	91	Essonne	Hurepoix	ChickPea	5.27	14.5	7.6415
91337	91	Essonne	Brie Francaise	ChickPea	4.52	14.5	6.554
91339	91	Essonne	Gatinais Riche	ChickPea	17.05	14.5	24.7225
91342	91	Essonne	Beauce	ChickPea	15.87	14.5	23.0115
95330	95	Val-d'Oise	Vexin	ChickPea	7.43	14.2	10.5506
77062	77	Seine-et-Marne	Brie Humide	FodderPea	5.26	87	45.762
77064	77	Seine-et-Marne	Pays de Biere et Foret de Fontaine	FodderPea	5.18	87	45.066
77320	77	Seine-et-Marne	Bassee et Basse-Yonne	FodderPea	0.21	87	1.827
77329	77	Seine-et-Marne	Goele et Multien	FodderPea	2.91	87	25.317
77337	77	Seine-et-Marne	Brie Francaise	FodderPea	25.72	87	223.764
77338	77	Seine-et-Marne	Gatinais Pauvre	FodderPea	32.76	87	285.012
78053	78	Yvelines	Plaine de Versailles	FodderPea	14.11	84	118.524
78334	78	Yvelines	Drouais	FodderPea	27.03	84	227.052
78342	78	Yvelines	Beauce	FodderPea	11.1	84	93.24
91055	91	Essonne	Hurepoix	FodderPea	11.41	82	93.562
91339	91	Essonne	Gatinais Riche	FodderPea	28.12	82	230.584
91342	91	Essonne	Beauce	FodderPea	36.91	82	302.662
77061	77	Seine-et-Marne	Vallees de la Marne et du Morin	FodderPea	3.72	87	32.364
77064	77	Seine-et-Marne	Pays de Biere et Foret de Fontaine	FodderPea	3.95	87	34.365
77335	77	Seine-et-Marne	Brie Champennoise	FodderPea	12.21	87	106.227
77338	77	Seine-et-Marne	Gatinais Pauvre	FodderPea	1.4	87	12.18
77339	77	Seine-et-Marne	Gatinais Riche	FodderPea	16.83	87	146.421
78054	78	Yvelines	Yvelines	FodderPea	18.17	84	152.628
78334	78	Yvelines	Drouais	FodderPea	9.29	84	78.036
91339	91	Essonne	Gatinais Riche	FodderPea	14.8	82	121.36
91342	91	Essonne	Beauce	FodderPea	18.79	82	154.078
95330	95	Val-d'Oise	Vexin	FodderPea	10.51	87	91.437
60330	60	Oise	Vexin	RedBerry	54.62	40	218.48
77057	77	Seine-et-Marne	Brie Boisee	RedBerry	0.1	99.5	0.995
77058	77	Seine-et-Marne	Brie Centrale	RedBerry	4.87	99.5	48.4565
77061	77	Seine-et-Marne	Vallees de la Marne et du Morin	RedBerry	0.36	99.5	3.582
77064	77	Seine-et-Marne	Pays de Biere et Foret de Fontaine	RedBerry	0.62	99.5	6.169
77336	77	Seine-et-Marne	Tardenois	RedBerry	0.65	99.5	6.4675
77337	77	Seine-et-Marne	Brie Francaise	RedBerry	2.44	99.5	24.278
77338	77	Seine-et-Marne	Gatinais Pauvre	RedBerry	0.5	99.5	4.975
78053	78	Yvelines	Plaine de Versailles	RedBerry	7.74	99.67	77.1446
78054	78	Yvelines	Yvelines	RedBerry	0.62	99.67	6.17954
78332	78	Yvelines	Vallee de la Seine	RedBerry	0.12	99.67	1.19604
78333	78	Yvelines	Ceinture de Paris	RedBerry	3.53	99.67	35.1835
91339	91	Essonne	Gatinais Riche	RedBerry	0.33	85.9917	2.83773
91342	91	Essonne	Beauce	RedBerry	1.28	85.9917	11.0069
95330	95	Val-d'Oise	Vexin	RedBerry	13.56	110	149.16
27080	27	Eure	Plateau de Madrie	Pea	7.3	34	24.82
28342	28	Eure-et-Loir	Beauce	Pea	47.7	40	190.8
45342	45	Loiret	Beauce	Pea	22.23	35	77.805
60041	60	Oise	Pays de Thelle	Pea	13.38	41	54.858
60330	60	Oise	Vexin	Pea	48.59	41	199.219
77056	77	Seine-et-Marne	Orxois	Pea	81.88	40	327.52
77057	77	Seine-et-Marne	Brie Boisee	Pea	74.56	40	298.24
77058	77	Seine-et-Marne	Brie Centrale	Pea	150.07	40	600.28
77059	77	Seine-et-Marne	Montois	Pea	104.6	40	418.4
77060	77	Seine-et-Marne	Brie Est	Pea	205.77	40	823.08
77061	77	Seine-et-Marne	Vallees de la Marne et du Morin	Pea	227.75	40	911
77062	77	Seine-et-Marne	Brie Humide	Pea	161.81	40	647.24
77064	77	Seine-et-Marne	Pays de Biere et Foret de Fontaine	Pea	134.78	40	539.12
77320	77	Seine-et-Marne	Bassee et Basse-Yonne	Pea	370.68	40	1482.72
77329	77	Seine-et-Marne	Goele et Multien	Pea	135.85	40	543.4
77335	77	Seine-et-Marne	Brie Champennoise	Pea	149.16	40	596.64
77336	77	Seine-et-Marne	Tardenois	Pea	487.85	40	1951.4
77337	77	Seine-et-Marne	Brie Francaise	Pea	175.07	40	700.28
77338	77	Seine-et-Marne	Gatinais Pauvre	Pea	243.44	40	973.76
77339	77	Seine-et-Marne	Gatinais Riche	Pea	190.73	40	762.92
78053	78	Yvelines	Plaine de Versailles	Pea	80.41	41	329.681
78054	78	Yvelines	Yvelines	Pea	129.44	41	530.704
78330	78	Yvelines	Vexin	Pea	58.17	41	238.497
78332	78	Yvelines	Vallee de la Seine	Pea	80.6	41	330.46
78333	78	Yvelines	Ceinture de Paris	Pea	13.92	41	57.072
78334	78	Yvelines	Drouais	Pea	82.1	41	336.61
78342	78	Yvelines	Beauce	Pea	74.98	41	307.418
89317	89	Yonne	Champagne Crayeuse	Pea	23.87	18	42.966
91055	91	Essonne	Hurepoix	Pea	59.82	43	257.226
91337	91	Essonne	Brie Francaise	Pea	10.53	43	45.279
91339	91	Essonne	Gatinais Riche	Pea	184.69	43	794.167
91342	91	Essonne	Beauce	Pea	675.23	43	2903.49
95329	95	Val-d'Oise	Vieille France	Pea	84.87	43	364.941
95330	95	Val-d'Oise	Vexin	Pea	275.61	43	1185.12
95333	95	Val-d'Oise	Ceinture de Paris	Pea	18.03	43	77.529
77061	77	Seine-et-Marne	Vallees de la Marne et du Morin	Leek	1.8	240.28	43.2504
77329	77	Seine-et-Marne	Goele et Multien	Leek	0.33	240.28	7.92924
77338	77	Seine-et-Marne	Gatinais Pauvre	Leek	1.04	240.28	24.9891
78332	78	Yvelines	Vallee de la Seine	Leek	1.68	221.17	37.1566
91333	91	Essonne	Ceinture de Paris	Leek	0.27	176.79	4.77333
95333	95	Val-d'Oise	Ceinture de Paris	Leek	0.81	248.8	20.1528
77057	77	Seine-et-Marne	Brie Boisee	Pumpkin	1.65	162.05	26.7383
77058	77	Seine-et-Marne	Brie Centrale	Pumpkin	2.18	162.05	35.3269
77061	77	Seine-et-Marne	Vallees de la Marne et du Morin	Pumpkin	2.75	162.05	44.5638
77335	77	Seine-et-Marne	Brie Champennoise	Pumpkin	0.42	162.05	6.8061
77337	77	Seine-et-Marne	Brie Francaise	Pumpkin	9.16	162.05	148.438
78334	78	Yvelines	Drouais	Pumpkin	2.8	265.47	74.3316
91333	91	Essonne	Ceinture de Paris	Pumpkin	5.39	219.49	118.305
91339	91	Essonne	Gatinais Riche	Pumpkin	4.64	219.49	101.843
91342	91	Essonne	Beauce	Pumpkin	0.85	219.49	18.6566
95329	95	Val-d'Oise	Vieille France	Pumpkin	0.29	222.66	6.45714
95333	95	Val-d'Oise	Ceinture de Paris	Pumpkin	0.09	222.66	2.00394
60329	60	Oise	Valois et Multien	Aroma	0.17	7.12	0.12104
77045	77	Seine-et-Marne	Butte de Dammartin	Aroma	1.07	5	0.535
77057	77	Seine-et-Marne	Brie Boisee	Aroma	17.91	5	8.955
77058	77	Seine-et-Marne	Brie Centrale	Aroma	0.55	5	0.275
77061	77	Seine-et-Marne	Vallees de la Marne et du Morin	Aroma	10.43	5	5.215
77062	77	Seine-et-Marne	Brie Humide	Aroma	0.57	5	0.285
77329	77	Seine-et-Marne	Goele et Multien	Aroma	32.37	5	16.185
77336	77	Seine-et-Marne	Tardenois	Aroma	0.4	5	0.2
78054	78	Yvelines	Yvelines	Aroma	3.19	0	0
78330	78	Yvelines	Vexin	Aroma	0.52	0	0
91333	91	Essonne	Ceinture de Paris	Aroma	9.41	3.54	3.33114
91339	91	Essonne	Gatinais Riche	Aroma	1.45	3.54	0.5133
91342	91	Essonne	Beauce	Aroma	44.96	3.54	15.9158
94333	94	Val-de-Marne	Ceinture de Paris	Aroma	0.18	0	0
95329	95	Val-d'Oise	Vieille France	Aroma	6.58	0	0
95333	95	Val-d'Oise	Ceinture de Paris	Aroma	9.49	0	0
2336	02	Aisne	Tardenois	NaturalGrassland	90.56	47.1	426.538
10019	10	Aube	Vallee du Nogentais	NaturalGrassland	12.16	50	60.8
10335	10	Aube	Brie Champennoise	NaturalGrassland	4.41	50	22.05
27080	27	Eure	Plateau de Madrie	NaturalGrassland	12.44	49	60.956
27330	27	Eure	Vexin	NaturalGrassland	142.41	49	697.809
27332	27	Eure	Vallee de la Seine	NaturalGrassland	7.05	49	34.545
28334	28	Eure-et-Loir	Drouais	NaturalGrassland	66.49	75	498.675
28342	28	Eure-et-Loir	Beauce	NaturalGrassland	5.82	75	43.65
45338	45	Loiret	Gatinais Pauvre	NaturalGrassland	12.49	59.8	74.6902
45339	45	Loiret	Gatinais Riche	NaturalGrassland	0.91	59.8	5.4418
51335	51	Marne	Brie Champennoise	NaturalGrassland	20.27	47	95.269
60041	60	Oise	Pays de Thelle	NaturalGrassland	0.98	43.8	4.2924
60329	60	Oise	Valois et Multien	NaturalGrassland	60.83	43.8	266.435
60330	60	Oise	Vexin	NaturalGrassland	50.11	43.8	219.482
77045	77	Seine-et-Marne	Butte de Dammartin	NaturalGrassland	61	50	305
77056	77	Seine-et-Marne	Orxois	NaturalGrassland	166.89	50	834.45
77057	77	Seine-et-Marne	Brie Boisee	NaturalGrassland	808.89	50	4044.45
77058	77	Seine-et-Marne	Brie Centrale	NaturalGrassland	241.09	50	1205.45
77059	77	Seine-et-Marne	Montois	NaturalGrassland	171.23	50	856.15
77060	77	Seine-et-Marne	Brie Est	NaturalGrassland	450.18	50	2250.9
77061	77	Seine-et-Marne	Vallees de la Marne et du Morin	NaturalGrassland	1616.16	50	8080.8
77062	77	Seine-et-Marne	Brie Humide	NaturalGrassland	707.77	50	3538.85
77064	77	Seine-et-Marne	Pays de Biere et Foret de Fontaine	NaturalGrassland	485.79	50	2428.95
77320	77	Seine-et-Marne	Bassee et Basse-Yonne	NaturalGrassland	274.45	50	1372.25
77329	77	Seine-et-Marne	Goele et Multien	NaturalGrassland	374.68	50	1873.4
77335	77	Seine-et-Marne	Brie Champennoise	NaturalGrassland	72.88	50	364.4
77336	77	Seine-et-Marne	Tardenois	NaturalGrassland	1603.09	50	8015.45
77337	77	Seine-et-Marne	Brie Francaise	NaturalGrassland	574.04	50	2870.2
77338	77	Seine-et-Marne	Gatinais Pauvre	NaturalGrassland	282.13	50	1410.65
77339	77	Seine-et-Marne	Gatinais Riche	NaturalGrassland	65.79	50	328.95
78053	78	Yvelines	Plaine de Versailles	NaturalGrassland	1089.29	48	5228.59
78054	78	Yvelines	Yvelines	NaturalGrassland	2295.51	48	11018.4
78055	78	Yvelines	Hurepoix	NaturalGrassland	129.62	48	622.176
78330	78	Yvelines	Vexin	NaturalGrassland	172.3	48	827.04
78332	78	Yvelines	Vallee de la Seine	NaturalGrassland	798.7	48	3833.76
78333	78	Yvelines	Ceinture de Paris	NaturalGrassland	231.04	48	1108.99
78334	78	Yvelines	Drouais	NaturalGrassland	696.34	48	3342.43
78342	78	Yvelines	Beauce	NaturalGrassland	14.89	48	71.472
89338	89	Yonne	Gatinais Pauvre	NaturalGrassland	4.17	41	17.097
91055	91	Essonne	Hurepoix	NaturalGrassland	779.79	48	3742.99
91333	91	Essonne	Ceinture de Paris	NaturalGrassland	174.08	48	835.584
91337	91	Essonne	Brie Francaise	NaturalGrassland	79.37	48	380.976
91339	91	Essonne	Gatinais Riche	NaturalGrassland	80.94	48	388.512
91342	91	Essonne	Beauce	NaturalGrassland	89.36	48	428.928
92333	92	Hauts-de-Seine	Ceinture de Paris	NaturalGrassland	4.95	43.1606	21.3645
93329	93	Seine-Saint-Denis	Vieille France	NaturalGrassland	5.25	51	26.775
93333	93	Seine-Saint-Denis	Ceinture de Paris	NaturalGrassland	30.35	51	154.785
94333	94	Val-de-Marne	Ceinture de Paris	NaturalGrassland	52.11	48	250.128
95329	95	Val-d'Oise	Vieille France	NaturalGrassland	414.78	51	2115.38
95330	95	Val-d'Oise	Vexin	NaturalGrassland	2269.77	51	11575.8
95332	95	Val-d'Oise	Vallee de la Seine	NaturalGrassland	18.32	51	93.432
95333	95	Val-d'Oise	Ceinture de Paris	NaturalGrassland	167.34	51	853.434
28342	28	Eure-et-Loir	Beauce	GardenPea	11.08	73.53	81.4712
77045	77	Seine-et-Marne	Butte de Dammartin	GardenPea	18.25	104.75	191.169
77057	77	Seine-et-Marne	Brie Boisee	GardenPea	0.25	104.75	2.61875
77059	77	Seine-et-Marne	Montois	GardenPea	9.24	104.75	96.789
77060	77	Seine-et-Marne	Brie Est	GardenPea	55.8	104.75	584.505
77061	77	Seine-et-Marne	Vallees de la Marne et du Morin	GardenPea	91.88	104.75	962.443
77329	77	Seine-et-Marne	Goele et Multien	GardenPea	135.56	104.75	1419.99
77338	77	Seine-et-Marne	Gatinais Pauvre	GardenPea	10.06	104.75	105.379
77339	77	Seine-et-Marne	Gatinais Riche	GardenPea	10.11	104.75	105.902
78053	78	Yvelines	Plaine de Versailles	GardenPea	3.81	55.38	21.0998
78332	78	Yvelines	Vallee de la Seine	GardenPea	0.3	55.38	1.6614
78334	78	Yvelines	Drouais	GardenPea	11.62	55.38	64.3516
78342	78	Yvelines	Beauce	GardenPea	22.36	55.38	123.83
91339	91	Essonne	Gatinais Riche	GardenPea	23.15	34	78.71
91342	91	Essonne	Beauce	GardenPea	19.76	34	67.184
77057	77	Seine-et-Marne	Brie Boisee	Aroma	10.29	5	5.145
77058	77	Seine-et-Marne	Brie Centrale	Aroma	3.02	5	1.51
77060	77	Seine-et-Marne	Brie Est	Aroma	0.38	5	0.19
77061	77	Seine-et-Marne	Vallees de la Marne et du Morin	Aroma	7.53	5	3.765
77064	77	Seine-et-Marne	Pays de Biere et Foret de Fontaine	Aroma	5.2	5	2.6
77329	77	Seine-et-Marne	Goele et Multien	Aroma	15.84	5	7.92
77335	77	Seine-et-Marne	Brie Champennoise	Aroma	4.95	5	2.475
77336	77	Seine-et-Marne	Tardenois	Aroma	0.91	5	0.455
77338	77	Seine-et-Marne	Gatinais Pauvre	Aroma	1.59	5	0.795
77339	77	Seine-et-Marne	Gatinais Riche	Aroma	0.75	5	0.375
78053	78	Yvelines	Plaine de Versailles	Aroma	2.21	0	0
78054	78	Yvelines	Yvelines	Aroma	1.51	0	0
91055	91	Essonne	Hurepoix	Aroma	0.17	3.54	0.06018
91333	91	Essonne	Ceinture de Paris	Aroma	0.12	3.54	0.04248
91339	91	Essonne	Gatinais Riche	Aroma	8.89	3.54	3.14706
91342	91	Essonne	Beauce	Aroma	2.86	3.54	1.01244
95329	95	Val-d'Oise	Vieille France	Aroma	5.78	0	0
95330	95	Val-d'Oise	Vexin	Aroma	0.46	0	0
95333	95	Val-d'Oise	Ceinture de Paris	Aroma	2.23	0	0
2336	02	Aisne	Tardenois	Pea	9.16	40	36.64
10335	10	Aube	Brie Champennoise	Pea	12	27	32.4
27080	27	Eure	Plateau de Madrie	Pea	11.4	34	38.76
28334	28	Eure-et-Loir	Drouais	Pea	5.64	40	22.56
28342	28	Eure-et-Loir	Beauce	Pea	15.24	40	60.96
45339	45	Loiret	Gatinais Riche	Pea	11.5	35	40.25
45342	45	Loiret	Beauce	Pea	11.24	35	39.34
51335	51	Marne	Brie Champennoise	Pea	50.87	39	198.393
60330	60	Oise	Vexin	Pea	29.35	41	120.335
77045	77	Seine-et-Marne	Butte de Dammartin	Pea	17.21	40	68.84
77056	77	Seine-et-Marne	Orxois	Pea	16.96	40	67.84
77057	77	Seine-et-Marne	Brie Boisee	Pea	14.99	40	59.96
77058	77	Seine-et-Marne	Brie Centrale	Pea	94.53	40	378.12
77059	77	Seine-et-Marne	Montois	Pea	93.4	40	373.6
77060	77	Seine-et-Marne	Brie Est	Pea	63.17	40	252.68
77061	77	Seine-et-Marne	Vallees de la Marne et du Morin	Pea	57.93	40	231.72
77062	77	Seine-et-Marne	Brie Humide	Pea	38.25	40	153
77064	77	Seine-et-Marne	Pays de Biere et Foret de Fontaine	Pea	117.82	40	471.28
77320	77	Seine-et-Marne	Bassee et Basse-Yonne	Pea	261.45	40	1045.8
77329	77	Seine-et-Marne	Goele et Multien	Pea	94.22	40	376.88
77335	77	Seine-et-Marne	Brie Champennoise	Pea	318.21	40	1272.84
77336	77	Seine-et-Marne	Tardenois	Pea	229.71	40	918.84
77337	77	Seine-et-Marne	Brie Francaise	Pea	114.29	40	457.16
77338	77	Seine-et-Marne	Gatinais Pauvre	Pea	183.6	40	734.4
77339	77	Seine-et-Marne	Gatinais Riche	Pea	361.88	40	1447.52
78053	78	Yvelines	Plaine de Versailles	Pea	185.9	41	762.19
78054	78	Yvelines	Yvelines	Pea	139.55	41	572.155
78055	78	Yvelines	Hurepoix	Pea	11.01	41	45.141
78330	78	Yvelines	Vexin	Pea	35.6	41	145.96
78332	78	Yvelines	Vallee de la Seine	Pea	89.82	41	368.262
78334	78	Yvelines	Drouais	Pea	393.94	41	1615.15
78342	78	Yvelines	Beauce	Pea	77.72	41	318.652
89317	89	Yonne	Champagne Crayeuse	Pea	1.37	18	2.466
89320	89	Yonne	Bassee et Basse-Yonne	Pea	10.67	18	19.206
91055	91	Essonne	Hurepoix	Pea	67.83	43	291.669
91337	91	Essonne	Brie Francaise	Pea	41.23	43	177.289
91339	91	Essonne	Gatinais Riche	Pea	402.72	43	1731.7
91342	91	Essonne	Beauce	Pea	864.17	43	3715.93
95329	95	Val-d'Oise	Vieille France	Pea	9.03	43	38.829
95330	95	Val-d'Oise	Vexin	Pea	553.16	43	2378.59
95333	95	Val-d'Oise	Ceinture de Paris	Pea	36.5	43	156.95
10019	10	Aube	Vallee du Nogentais	Grassland	14.5	50	72.5
28342	28	Eure-et-Loir	Beauce	Grassland	0.62	75	4.65
77045	77	Seine-et-Marne	Butte de Dammartin	Grassland	22.7	50	113.5
77056	77	Seine-et-Marne	Orxois	Grassland	11.13	50	55.65
77057	77	Seine-et-Marne	Brie Boisee	Grassland	13.41	50	67.05
77058	77	Seine-et-Marne	Brie Centrale	Grassland	12.24	50	61.2
77059	77	Seine-et-Marne	Montois	Grassland	2.91	50	14.55
77060	77	Seine-et-Marne	Brie Est	Grassland	26.43	50	132.15
77061	77	Seine-et-Marne	Vallees de la Marne et du Morin	Grassland	76.73	50	383.65
77062	77	Seine-et-Marne	Brie Humide	Grassland	58.19	50	290.95
77064	77	Seine-et-Marne	Pays de Biere et Foret de Fontaine	Grassland	44.91	50	224.55
77320	77	Seine-et-Marne	Bassee et Basse-Yonne	Grassland	19.13	50	95.65
77329	77	Seine-et-Marne	Goele et Multien	Grassland	37.28	50	186.4
77335	77	Seine-et-Marne	Brie Champennoise	Grassland	1.58	50	7.9
77336	77	Seine-et-Marne	Tardenois	Grassland	99.26	50	496.3
77337	77	Seine-et-Marne	Brie Francaise	Grassland	19.67	50	98.35
77338	77	Seine-et-Marne	Gatinais Pauvre	Grassland	58.54	50	292.7
77339	77	Seine-et-Marne	Gatinais Riche	Grassland	6.97	50	34.85
78053	78	Yvelines	Plaine de Versailles	Grassland	21.56	48	103.488
78054	78	Yvelines	Yvelines	Grassland	133.21	48	639.408
78330	78	Yvelines	Vexin	Grassland	1.05	48	5.04
78332	78	Yvelines	Vallee de la Seine	Grassland	52.77	48	253.296
78334	78	Yvelines	Drouais	Grassland	27.05	48	129.84
89338	89	Yonne	Gatinais Pauvre	Grassland	11.9	41	48.79
91055	91	Essonne	Hurepoix	Grassland	201.61	48	967.728
91333	91	Essonne	Ceinture de Paris	Grassland	10.99	48	52.752
91337	91	Essonne	Brie Francaise	Grassland	2.45	48	11.76
91339	91	Essonne	Gatinais Riche	Grassland	25.54	48	122.592
91342	91	Essonne	Beauce	Grassland	40.86	48	196.128
94333	94	Val-de-Marne	Ceinture de Paris	Grassland	17.92	48	86.016
95330	95	Val-d'Oise	Vexin	Grassland	86.84	51	442.884
95333	95	Val-d'Oise	Ceinture de Paris	Grassland	2.13	51	10.863
28342	28	Eure-et-Loir	Beauce	Condiment	11.02	80	88.16
77057	77	Seine-et-Marne	Brie Boisee	Condiment	4.86	61	29.646
77064	77	Seine-et-Marne	Pays de Biere et Foret de Fontaine	Condiment	8.72	61	53.192
77339	77	Seine-et-Marne	Gatinais Riche	Condiment	45.2	61	275.72
78054	78	Yvelines	Yvelines	Condiment	10.71	490	524.79
78333	78	Yvelines	Ceinture de Paris	Condiment	1.42	490	69.58
78342	78	Yvelines	Beauce	Condiment	69.21	490	3391.29
91339	91	Essonne	Gatinais Riche	Condiment	2.1	644	135.24
91342	91	Essonne	Beauce	Condiment	15.25	644	982.1
95329	95	Val-d'Oise	Vieille France	Condiment	1.04	771	80.184
28334	28	Eure-et-Loir	Drouais	PotatoConsumption	4.54	464.7	210.974
28342	28	Eure-et-Loir	Beauce	PotatoConsumption	42.43	464.7	1971.72
45339	45	Loiret	Gatinais Riche	PotatoConsumption	22.92	426.6	977.767
60329	60	Oise	Valois et Multien	PotatoConsumption	26.68	368.7	983.692
77045	77	Seine-et-Marne	Butte de Dammartin	PotatoConsumption	6.9	400.7	276.483
77057	77	Seine-et-Marne	Brie Boisee	PotatoConsumption	20	400.7	801.4
77058	77	Seine-et-Marne	Brie Centrale	PotatoConsumption	418.53	400.7	16770.5
77059	77	Seine-et-Marne	Montois	PotatoConsumption	1.16	400.7	46.4812
77060	77	Seine-et-Marne	Brie Est	PotatoConsumption	237.24	400.7	9506.21
77061	77	Seine-et-Marne	Vallees de la Marne et du Morin	PotatoConsumption	82.97	400.7	3324.61
77062	77	Seine-et-Marne	Brie Humide	PotatoConsumption	20.49	400.7	821.034
77064	77	Seine-et-Marne	Pays de Biere et Foret de Fontaine	PotatoConsumption	30.76	400.7	1232.55
77320	77	Seine-et-Marne	Bassee et Basse-Yonne	PotatoConsumption	277.73	400.7	11128.6
77329	77	Seine-et-Marne	Goele et Multien	PotatoConsumption	308.53	400.7	12362.8
77335	77	Seine-et-Marne	Brie Champennoise	PotatoConsumption	277.6	400.7	11123.4
77336	77	Seine-et-Marne	Tardenois	PotatoConsumption	53.12	400.7	2128.52
77337	77	Seine-et-Marne	Brie Francaise	PotatoConsumption	166.55	400.7	6673.66
77338	77	Seine-et-Marne	Gatinais Pauvre	PotatoConsumption	1.21	400.7	48.4847
77339	77	Seine-et-Marne	Gatinais Riche	PotatoConsumption	280.53	400.7	11240.8
78053	78	Yvelines	Plaine de Versailles	PotatoConsumption	231.35	411.2	9513.11
78054	78	Yvelines	Yvelines	PotatoConsumption	3.08	411.2	126.65
78055	78	Yvelines	Hurepoix	PotatoConsumption	12.49	411.2	513.589
78332	78	Yvelines	Vallee de la Seine	PotatoConsumption	5.51	411.2	226.571
78333	78	Yvelines	Ceinture de Paris	PotatoConsumption	3.89	411.2	159.957
78334	78	Yvelines	Drouais	PotatoConsumption	10.39	411.2	427.237
78342	78	Yvelines	Beauce	PotatoConsumption	248.1	411.2	10201.9
89317	89	Yonne	Champagne Crayeuse	PotatoConsumption	4.9	190	93.1
91055	91	Essonne	Hurepoix	PotatoConsumption	38.44	402.7	1547.98
91333	91	Essonne	Ceinture de Paris	PotatoConsumption	0.85	402.7	34.2295
91337	91	Essonne	Brie Francaise	PotatoConsumption	15.48	402.7	623.38
91339	91	Essonne	Gatinais Riche	PotatoConsumption	285.19	402.7	11484.6
91342	91	Essonne	Beauce	PotatoConsumption	494.07	402.7	19896.2
93329	93	Seine-Saint-Denis	Vieille France	PotatoConsumption	3.08	417	128.436
94333	94	Val-de-Marne	Ceinture de Paris	PotatoConsumption	0.67	329.2	22.0564
95329	95	Val-d'Oise	Vieille France	PotatoConsumption	125.31	389.4	4879.57
95330	95	Val-d'Oise	Vexin	PotatoConsumption	81.4	389.4	3169.72
95333	95	Val-d'Oise	Ceinture de Paris	PotatoConsumption	12.35	389.4	480.909
51335	51	Marne	Brie Champennoise	PotatoStarch	9.67	384	371.328
77057	77	Seine-et-Marne	Brie Boisee	PotatoStarch	25.7	421	1081.97
77058	77	Seine-et-Marne	Brie Centrale	PotatoStarch	34.7	421	1460.87
77060	77	Seine-et-Marne	Brie Est	PotatoStarch	98.75	421	4157.38
77061	77	Seine-et-Marne	Vallees de la Marne et du Morin	PotatoStarch	53.23	421	2240.98
77329	77	Seine-et-Marne	Goele et Multien	PotatoStarch	173.21	421	7292.14
77335	77	Seine-et-Marne	Brie Champennoise	PotatoStarch	8.68	421	365.428
77336	77	Seine-et-Marne	Tardenois	PotatoStarch	198.06	421	8338.33
77337	77	Seine-et-Marne	Brie Francaise	PotatoStarch	14.2	421	597.82
91337	91	Essonne	Brie Francaise	PotatoStarch	5	400	200
91339	91	Essonne	Gatinais Riche	PotatoStarch	5.3	400	212
95329	95	Val-d'Oise	Vieille France	PotatoStarch	41.25	410	1691.25
95333	95	Val-d'Oise	Ceinture de Paris	PotatoStarch	20.54	410	842.14
2336	02	Aisne	Tardenois	TemporaryGrassland	5.13	77.4	39.7062
10019	10	Aube	Vallee du Nogentais	TemporaryGrassland	27.42	93.7	256.925
28342	28	Eure-et-Loir	Beauce	TemporaryGrassland	11.93	83.7	99.8541
51335	51	Marne	Brie Champennoise	TemporaryGrassland	0.1	104.2	1.042
60041	60	Oise	Pays de Thelle	TemporaryGrassland	2.93	67.9	19.8947
60329	60	Oise	Valois et Multien	TemporaryGrassland	34.45	67.9	233.916
60330	60	Oise	Vexin	TemporaryGrassland	10.13	67.9	68.7827
77045	77	Seine-et-Marne	Butte de Dammartin	TemporaryGrassland	13.75	77.5	106.562
77056	77	Seine-et-Marne	Orxois	TemporaryGrassland	12.27	77.5	95.0925
77057	77	Seine-et-Marne	Brie Boisee	TemporaryGrassland	274.91	77.5	2130.55
77058	77	Seine-et-Marne	Brie Centrale	TemporaryGrassland	280.35	77.5	2172.71
77059	77	Seine-et-Marne	Montois	TemporaryGrassland	155.58	77.5	1205.75
77060	77	Seine-et-Marne	Brie Est	TemporaryGrassland	125.37	77.5	971.618
77061	77	Seine-et-Marne	Vallees de la Marne et du Morin	TemporaryGrassland	543.73	77.5	4213.91
77062	77	Seine-et-Marne	Brie Humide	TemporaryGrassland	196.5	77.5	1522.88
77064	77	Seine-et-Marne	Pays de Biere et Foret de Fontaine	TemporaryGrassland	207.87	77.5	1610.99
77320	77	Seine-et-Marne	Bassee et Basse-Yonne	TemporaryGrassland	101.2	77.5	784.3
77329	77	Seine-et-Marne	Goele et Multien	TemporaryGrassland	165.64	77.5	1283.71
77335	77	Seine-et-Marne	Brie Champennoise	TemporaryGrassland	70.85	77.5	549.088
77336	77	Seine-et-Marne	Tardenois	TemporaryGrassland	282.52	77.5	2189.53
77337	77	Seine-et-Marne	Brie Francaise	TemporaryGrassland	337.14	77.5	2612.84
77338	77	Seine-et-Marne	Gatinais Pauvre	TemporaryGrassland	162.76	77.5	1261.39
77339	77	Seine-et-Marne	Gatinais Riche	TemporaryGrassland	108.01	77.5	837.077
78053	78	Yvelines	Plaine de Versailles	TemporaryGrassland	399.25	75.4	3010.35
78054	78	Yvelines	Yvelines	TemporaryGrassland	852.23	75.4	6425.81
78055	78	Yvelines	Hurepoix	TemporaryGrassland	54.74	75.4	412.74
78330	78	Yvelines	Vexin	TemporaryGrassland	86.63	75.4	653.19
78332	78	Yvelines	Vallee de la Seine	TemporaryGrassland	588.55	75.4	4437.67
78333	78	Yvelines	Ceinture de Paris	TemporaryGrassland	40.4	75.4	304.616
78334	78	Yvelines	Drouais	TemporaryGrassland	117.89	75.4	888.891
78342	78	Yvelines	Beauce	TemporaryGrassland	33.01	75.4	248.895
89338	89	Yonne	Gatinais Pauvre	TemporaryGrassland	1.83	61.7	11.2911
91055	91	Essonne	Hurepoix	TemporaryGrassland	600.94	78	4687.33
91333	91	Essonne	Ceinture de Paris	TemporaryGrassland	26.35	78	205.53
91337	91	Essonne	Brie Francaise	TemporaryGrassland	55.61	78	433.758
91339	91	Essonne	Gatinais Riche	TemporaryGrassland	243.36	78	1898.21
91342	91	Essonne	Beauce	TemporaryGrassland	337.89	78	2635.54
93333	93	Seine-Saint-Denis	Ceinture de Paris	TemporaryGrassland	30.38	69	209.622
94333	94	Val-de-Marne	Ceinture de Paris	TemporaryGrassland	2.13	69	14.697
95329	95	Val-d'Oise	Vieille France	TemporaryGrassland	162.95	73.2	1192.79
95330	95	Val-d'Oise	Vexin	TemporaryGrassland	1268.59	73.2	9286.08
95332	95	Val-d'Oise	Vallee de la Seine	TemporaryGrassland	19.05	73.2	139.446
95333	95	Val-d'Oise	Ceinture de Paris	TemporaryGrassland	30.54	73.2	223.553
77057	77	Seine-et-Marne	Brie Boisee	Pepper	0.29	248.55	7.20795
77058	77	Seine-et-Marne	Brie Centrale	Pepper	0.07	248.55	1.73985
77058	77	Seine-et-Marne	Brie Centrale	Radish	0.24	142	3.408
77064	77	Seine-et-Marne	Pays de Biere et Foret de Fontaine	Radish	4.64	142	65.888
78332	78	Yvelines	Vallee de la Seine	Radish	1.4	140	19.6
78333	78	Yvelines	Ceinture de Paris	Radish	9.39	140	131.46
91337	91	Essonne	Brie Francaise	Radish	7.23	142	102.666
2336	02	Aisne	Tardenois	Raygrass	13.65	64.8	88.452
27080	27	Eure	Plateau de Madrie	Raygrass	1.63	64	10.432
51335	51	Marne	Brie Champennoise	Raygrass	0.15	57	0.855
77056	77	Seine-et-Marne	Orxois	Raygrass	4.21	70	29.47
77057	77	Seine-et-Marne	Brie Boisee	Raygrass	0.17	70	1.19
77058	77	Seine-et-Marne	Brie Centrale	Raygrass	0.51	70	3.57
77059	77	Seine-et-Marne	Montois	Raygrass	0.08	70	0.56
77060	77	Seine-et-Marne	Brie Est	Raygrass	23.71	70	165.97
77061	77	Seine-et-Marne	Vallees de la Marne et du Morin	Raygrass	11.88	70	83.16
77062	77	Seine-et-Marne	Brie Humide	Raygrass	17.69	70	123.83
77064	77	Seine-et-Marne	Pays de Biere et Foret de Fontaine	Raygrass	3.87	70	27.09
77320	77	Seine-et-Marne	Bassee et Basse-Yonne	Raygrass	3.48	70	24.36
77329	77	Seine-et-Marne	Goele et Multien	Raygrass	0.14	70	0.98
77335	77	Seine-et-Marne	Brie Champennoise	Raygrass	20.06	70	140.42
77336	77	Seine-et-Marne	Tardenois	Raygrass	44.41	70	310.87
77337	77	Seine-et-Marne	Brie Francaise	Raygrass	25.26	70	176.82
77338	77	Seine-et-Marne	Gatinais Pauvre	Raygrass	18.2	70	127.4
77339	77	Seine-et-Marne	Gatinais Riche	Raygrass	15.4	70	107.8
78053	78	Yvelines	Plaine de Versailles	Raygrass	2.12	69	14.628
78054	78	Yvelines	Yvelines	Raygrass	38.23	69	263.787
78055	78	Yvelines	Hurepoix	Raygrass	27.53	69	189.957
78332	78	Yvelines	Vallee de la Seine	Raygrass	0.19	69	1.311
78333	78	Yvelines	Ceinture de Paris	Raygrass	3.39	69	23.391
78334	78	Yvelines	Drouais	Raygrass	24.72	69	170.568
91055	91	Essonne	Hurepoix	Raygrass	34.7	69	239.43
91337	91	Essonne	Brie Francaise	Raygrass	3.43	69	23.667
91339	91	Essonne	Gatinais Riche	Raygrass	8.95	69	61.755
91342	91	Essonne	Beauce	Raygrass	23.96	69	165.324
95329	95	Val-d'Oise	Vieille France	Raygrass	6.52	69	44.988
95330	95	Val-d'Oise	Vexin	Raygrass	2.86	69	19.734
95333	95	Val-d'Oise	Ceinture de Paris	Raygrass	0.35	69	2.415
77058	77	Seine-et-Marne	Brie Centrale	TemporaryGrassland	1.3	87	11.31
77060	77	Seine-et-Marne	Brie Est	TemporaryGrassland	0.27	87	2.349
77061	77	Seine-et-Marne	Vallees de la Marne et du Morin	TemporaryGrassland	0.28	87	2.436
77320	77	Seine-et-Marne	Bassee et Basse-Yonne	TemporaryGrassland	6.07	87	52.809
77329	77	Seine-et-Marne	Goele et Multien	TemporaryGrassland	6.08	87	52.896
77335	77	Seine-et-Marne	Brie Champennoise	TemporaryGrassland	1.6	87	13.92
77336	77	Seine-et-Marne	Tardenois	TemporaryGrassland	2.16	87	18.792
77338	77	Seine-et-Marne	Gatinais Pauvre	TemporaryGrassland	5.17	87	44.979
77339	77	Seine-et-Marne	Gatinais Riche	TemporaryGrassland	0.78	87	6.786
78332	78	Yvelines	Vallee de la Seine	TemporaryGrassland	5.21	84	43.764
91339	91	Essonne	Gatinais Riche	TemporaryGrassland	2.8	82	22.96
91342	91	Essonne	Beauce	TemporaryGrassland	6.87	82	56.334
60330	60	Oise	Vexin	PoorPastures	2.42	25	6.05
77056	77	Seine-et-Marne	Orxois	PoorPastures	2.5	7	1.75
77058	77	Seine-et-Marne	Brie Centrale	PoorPastures	0.22	7	0.154
77059	77	Seine-et-Marne	Montois	PoorPastures	0.77	7	0.539
77060	77	Seine-et-Marne	Brie Est	PoorPastures	0.4	7	0.28
77061	77	Seine-et-Marne	Vallees de la Marne et du Morin	PoorPastures	2.6	7	1.82
77062	77	Seine-et-Marne	Brie Humide	PoorPastures	0.35	7	0.245
77064	77	Seine-et-Marne	Pays de Biere et Foret de Fontaine	PoorPastures	2.62	7	1.834
77320	77	Seine-et-Marne	Bassee et Basse-Yonne	PoorPastures	0.52	7	0.364
77329	77	Seine-et-Marne	Goele et Multien	PoorPastures	0.52	7	0.364
77335	77	Seine-et-Marne	Brie Champennoise	PoorPastures	0.41	7	0.287
77336	77	Seine-et-Marne	Tardenois	PoorPastures	1.04	7	0.728
77337	77	Seine-et-Marne	Brie Francaise	PoorPastures	0.63	7	0.441
77338	77	Seine-et-Marne	Gatinais Pauvre	PoorPastures	7.76	7	5.432
77339	77	Seine-et-Marne	Gatinais Riche	PoorPastures	1.23	7	0.861
78053	78	Yvelines	Plaine de Versailles	PoorPastures	0.96	7	0.672
78054	78	Yvelines	Yvelines	PoorPastures	15.51	7	10.857
78055	78	Yvelines	Hurepoix	PoorPastures	1.94	7	1.358
78330	78	Yvelines	Vexin	PoorPastures	0.46	7	0.322
78332	78	Yvelines	Vallee de la Seine	PoorPastures	0.6	7	0.42
78333	78	Yvelines	Ceinture de Paris	PoorPastures	3.8	7	2.66
78334	78	Yvelines	Drouais	PoorPastures	0.03	7	0.021
91055	91	Essonne	Hurepoix	PoorPastures	1.14	8	0.912
91333	91	Essonne	Ceinture de Paris	PoorPastures	0.03	8	0.024
91339	91	Essonne	Gatinais Riche	PoorPastures	1.18	8	0.944
91342	91	Essonne	Beauce	PoorPastures	0.48	8	0.384
95329	95	Val-d'Oise	Vieille France	PoorPastures	1.17	7	0.819
95330	95	Val-d'Oise	Vexin	PoorPastures	3.24	7	2.268
95333	95	Val-d'Oise	Ceinture de Paris	PoorPastures	1.36	7	0.952
77058	77	Seine-et-Marne	Brie Centrale	Aromatic	0.26	30.9123	0.80372
77338	77	Seine-et-Marne	Gatinais Pauvre	Aromatic	1	30.9123	3.09123
77339	77	Seine-et-Marne	Gatinais Riche	Aromatic	6.26	30.9123	19.3511
78342	78	Yvelines	Beauce	Aromatic	5.77	30.9123	17.8364
91339	91	Essonne	Gatinais Riche	Aromatic	3.81	30.9123	11.7776
91342	91	Essonne	Beauce	Aromatic	0.54	30.9123	1.66926
2336	02	Aisne	Tardenois	Rye	5.38	64.1	34.4858
77045	77	Seine-et-Marne	Butte de Dammartin	Rye	5.06	60	30.36
77057	77	Seine-et-Marne	Brie Boisee	Rye	1.08	60	6.48
77058	77	Seine-et-Marne	Brie Centrale	Rye	26.44	60	158.64
77059	77	Seine-et-Marne	Montois	Rye	9.13	60	54.78
77060	77	Seine-et-Marne	Brie Est	Rye	47.86	60	287.16
77061	77	Seine-et-Marne	Vallees de la Marne et du Morin	Rye	198.27	60	1189.62
77062	77	Seine-et-Marne	Brie Humide	Rye	2.26	60	13.56
77064	77	Seine-et-Marne	Pays de Biere et Foret de Fontaine	Rye	102.66	60	615.96
77320	77	Seine-et-Marne	Bassee et Basse-Yonne	Rye	23.95	60	143.7
77329	77	Seine-et-Marne	Goele et Multien	Rye	19.63	60	117.78
77335	77	Seine-et-Marne	Brie Champennoise	Rye	5	60	30
77336	77	Seine-et-Marne	Tardenois	Rye	26.76	60	160.56
77337	77	Seine-et-Marne	Brie Francaise	Rye	14.43	60	86.58
77338	77	Seine-et-Marne	Gatinais Pauvre	Rye	5.64	60	33.84
77339	77	Seine-et-Marne	Gatinais Riche	Rye	4.29	60	25.74
78053	78	Yvelines	Plaine de Versailles	Rye	27	60	162
78054	78	Yvelines	Yvelines	Rye	77.26	60	463.56
78333	78	Yvelines	Ceinture de Paris	Rye	6.52	60	39.12
78334	78	Yvelines	Drouais	Rye	11.95	60	71.7
91055	91	Essonne	Hurepoix	Rye	163.94	58	950.852
91337	91	Essonne	Brie Francaise	Rye	10.02	58	58.116
91339	91	Essonne	Gatinais Riche	Rye	65.23	58	378.334
91342	91	Essonne	Beauce	Rye	28.12	58	163.096
77061	77	Seine-et-Marne	Vallees de la Marne et du Morin	Rye	4.97	60	29.82
77064	77	Seine-et-Marne	Pays de Biere et Foret de Fontaine	Rye	2.43	60	14.58
77320	77	Seine-et-Marne	Bassee et Basse-Yonne	Rye	6.89	60	41.34
77336	77	Seine-et-Marne	Tardenois	Rye	3.58	60	21.48
77337	77	Seine-et-Marne	Brie Francaise	Rye	0.75	60	4.5
2336	02	Aisne	Tardenois	Sorghum	4.63	53	24.539
27080	27	Eure	Plateau de Madrie	Sorghum	10.43	40	41.72
28342	28	Eure-et-Loir	Beauce	Sorghum	10.17	58	58.986
60329	60	Oise	Valois et Multien	Sorghum	2.11	55	11.605
60330	60	Oise	Vexin	Sorghum	0.62	55	3.41
77057	77	Seine-et-Marne	Brie Boisee	Sorghum	37.27	73	272.071
77058	77	Seine-et-Marne	Brie Centrale	Sorghum	28.2	73	205.86
77059	77	Seine-et-Marne	Montois	Sorghum	66.3	73	483.99
77060	77	Seine-et-Marne	Brie Est	Sorghum	28.71	73	209.583
77061	77	Seine-et-Marne	Vallees de la Marne et du Morin	Sorghum	83.61	73	610.353
77062	77	Seine-et-Marne	Brie Humide	Sorghum	35.43	73	258.639
77064	77	Seine-et-Marne	Pays de Biere et Foret de Fontaine	Sorghum	96.25	73	702.625
77320	77	Seine-et-Marne	Bassee et Basse-Yonne	Sorghum	108.92	73	795.116
77329	77	Seine-et-Marne	Goele et Multien	Sorghum	54.2	73	395.66
77335	77	Seine-et-Marne	Brie Champennoise	Sorghum	9.64	73	70.372
77336	77	Seine-et-Marne	Tardenois	Sorghum	21.38	73	156.074
77337	77	Seine-et-Marne	Brie Francaise	Sorghum	22.47	73	164.031
77338	77	Seine-et-Marne	Gatinais Pauvre	Sorghum	80.17	73	585.241
77339	77	Seine-et-Marne	Gatinais Riche	Sorghum	171.36	73	1250.93
78053	78	Yvelines	Plaine de Versailles	Sorghum	124.73	73	910.529
78054	78	Yvelines	Yvelines	Sorghum	121.27	73	885.271
78055	78	Yvelines	Hurepoix	Sorghum	0.75	73	5.475
78330	78	Yvelines	Vexin	Sorghum	3.64	73	26.572
78332	78	Yvelines	Vallee de la Seine	Sorghum	31.07	73	226.811
78333	78	Yvelines	Ceinture de Paris	Sorghum	18.86	73	137.678
78334	78	Yvelines	Drouais	Sorghum	103.16	73	753.068
89317	89	Yonne	Champagne Crayeuse	Sorghum	0.31	34	1.054
91055	91	Essonne	Hurepoix	Sorghum	15.24	73	111.252
91337	91	Essonne	Brie Francaise	Sorghum	26.42	73	192.866
91339	91	Essonne	Gatinais Riche	Sorghum	6.54	73	47.742
91342	91	Essonne	Beauce	Sorghum	5.77	73	42.121
95329	95	Val-d'Oise	Vieille France	Sorghum	3.43	73	25.039
95330	95	Val-d'Oise	Vexin	Sorghum	102.91	73	751.243
95333	95	Val-d'Oise	Ceinture de Paris	Sorghum	5.71	73	41.683
10019	10	Aube	Vallee du Nogentais	Soja	3.79	17	6.443
28334	28	Eure-et-Loir	Drouais	Soja	10.59	29	30.711
28342	28	Eure-et-Loir	Beauce	Soja	21.74	29	63.046
45339	45	Loiret	Gatinais Riche	Soja	20.68	26	53.768
45342	45	Loiret	Beauce	Soja	13.65	26	35.49
51335	51	Marne	Brie Champennoise	Soja	7.32	21	15.372
77057	77	Seine-et-Marne	Brie Boisee	Soja	42.31	28	118.468
77058	77	Seine-et-Marne	Brie Centrale	Soja	109.27	28	305.956
77059	77	Seine-et-Marne	Montois	Soja	79.24	28	221.872
77060	77	Seine-et-Marne	Brie Est	Soja	120.84	28	338.352
77061	77	Seine-et-Marne	Vallees de la Marne et du Morin	Soja	277.12	28	775.936
77062	77	Seine-et-Marne	Brie Humide	Soja	28.09	28	78.652
77064	77	Seine-et-Marne	Pays de Biere et Foret de Fontaine	Soja	42.29	28	118.412
77320	77	Seine-et-Marne	Bassee et Basse-Yonne	Soja	83.04	28	232.512
77329	77	Seine-et-Marne	Goele et Multien	Soja	6.43	28	18.004
77335	77	Seine-et-Marne	Brie Champennoise	Soja	46.1	28	129.08
77336	77	Seine-et-Marne	Tardenois	Soja	344.11	28	963.508
77337	77	Seine-et-Marne	Brie Francaise	Soja	41.43	28	116.004
77338	77	Seine-et-Marne	Gatinais Pauvre	Soja	47.9	28	134.12
77339	77	Seine-et-Marne	Gatinais Riche	Soja	61.56	28	172.368
78053	78	Yvelines	Plaine de Versailles	Soja	59.16	28	165.648
78054	78	Yvelines	Yvelines	Soja	174.12	28	487.536
78055	78	Yvelines	Hurepoix	Soja	18.28	28	51.184
78334	78	Yvelines	Drouais	Soja	37.1	28	103.88
78342	78	Yvelines	Beauce	Soja	15.43	28	43.204
91055	91	Essonne	Hurepoix	Soja	167.79	28	469.812
91337	91	Essonne	Brie Francaise	Soja	2.94	28	8.232
91339	91	Essonne	Gatinais Riche	Soja	57.13	28	159.964
91342	91	Essonne	Beauce	Soja	176.92	28	495.376
95330	95	Val-d'Oise	Vexin	Soja	6.03	28	16.884
77064	77	Seine-et-Marne	Pays de Biere et Foret de Fontaine	OtherGrassland	0.91	45.2	4.1132
77320	77	Seine-et-Marne	Bassee et Basse-Yonne	OtherGrassland	68.57	45.2	309.936
77339	77	Seine-et-Marne	Gatinais Riche	OtherGrassland	0.87	45.2	3.9324
78054	78	Yvelines	Yvelines	OtherGrassland	1.72	43	7.396
91337	91	Essonne	Brie Francaise	OtherGrassland	54.98	42.2	232.016
95330	95	Val-d'Oise	Vexin	OtherGrassland	0.98	49.3	4.8314
95330	95	Val-d'Oise	Vexin	PoorPastures	1.35	7	0.945
28342	28	Eure-et-Loir	Beauce	Aromatic	4.76	127.22	60.5567
78342	78	Yvelines	Beauce	Aromatic	4.76	30.9123	14.7143
91339	91	Essonne	Gatinais Riche	Aromatic	0.35	30.9123	1.08193
91342	91	Essonne	Beauce	Aromatic	4.76	30.9123	14.7143
77056	77	Seine-et-Marne	Orxois	Buckwheat	25.75	80.7	207.803
77057	77	Seine-et-Marne	Brie Boisee	Buckwheat	12.9	80.7	104.103
77058	77	Seine-et-Marne	Brie Centrale	Buckwheat	60.82	80.7	490.817
77059	77	Seine-et-Marne	Montois	Buckwheat	35.42	80.7	285.839
77060	77	Seine-et-Marne	Brie Est	Buckwheat	15.73	80.7	126.941
77061	77	Seine-et-Marne	Vallees de la Marne et du Morin	Buckwheat	46.58	80.7	375.901
77062	77	Seine-et-Marne	Brie Humide	Buckwheat	15.4	80.7	124.278
77064	77	Seine-et-Marne	Pays de Biere et Foret de Fontaine	Buckwheat	8.47	80.7	68.3529
77320	77	Seine-et-Marne	Bassee et Basse-Yonne	Buckwheat	19.13	80.7	154.379
77329	77	Seine-et-Marne	Goele et Multien	Buckwheat	1	80.7	8.07
77335	77	Seine-et-Marne	Brie Champennoise	Buckwheat	15.12	80.7	122.018
77336	77	Seine-et-Marne	Tardenois	Buckwheat	28.27	80.7	228.139
77337	77	Seine-et-Marne	Brie Francaise	Buckwheat	22.05	80.7	177.944
77338	77	Seine-et-Marne	Gatinais Pauvre	Buckwheat	12.92	80.7	104.264
77339	77	Seine-et-Marne	Gatinais Riche	Buckwheat	28.95	80.7	233.626
78053	78	Yvelines	Plaine de Versailles	Buckwheat	0.8	78.3	6.264
78054	78	Yvelines	Yvelines	Buckwheat	80.76	78.3	632.351
78332	78	Yvelines	Vallee de la Seine	Buckwheat	22	78.3	172.26
78334	78	Yvelines	Drouais	Buckwheat	8.99	78.3	70.3917
78342	78	Yvelines	Beauce	Buckwheat	5.35	78.3	41.8905
89338	89	Yonne	Gatinais Pauvre	Buckwheat	15.39	54.8	84.3372
91055	91	Essonne	Hurepoix	Buckwheat	42.72	79	337.488
91333	91	Essonne	Ceinture de Paris	Buckwheat	22.85	79	180.515
91337	91	Essonne	Brie Francaise	Buckwheat	18.38	79	145.202
91339	91	Essonne	Gatinais Riche	Buckwheat	22.34	79	176.486
91342	91	Essonne	Beauce	Buckwheat	59.49	79	469.971
95329	95	Val-d'Oise	Vieille France	Buckwheat	0.77	81.4	6.2678
95330	95	Val-d'Oise	Vexin	Buckwheat	4.27	81.4	34.7578
95333	95	Val-d'Oise	Ceinture de Paris	Buckwheat	3.38	81.4	27.5132
77057	77	Seine-et-Marne	Brie Boisee	Aromatic	1.56	30.9123	4.82232
77058	77	Seine-et-Marne	Brie Centrale	Aromatic	0.25	30.9123	0.772808
77064	77	Seine-et-Marne	Pays de Biere et Foret de Fontaine	Aromatic	1.1	30.9123	3.40035
77320	77	Seine-et-Marne	Bassee et Basse-Yonne	Aromatic	1.14	30.9123	3.524
77339	77	Seine-et-Marne	Gatinais Riche	Aromatic	44.04	30.9123	136.138
91339	91	Essonne	Gatinais Riche	Aromatic	10.81	30.9123	33.4162
91342	91	Essonne	Beauce	Aromatic	7.62	30.9123	23.5552
77058	77	Seine-et-Marne	Brie Centrale	Tomato	4.76	788.95	375.54
77060	77	Seine-et-Marne	Brie Est	Tomato	0.03	788.95	2.36685
77064	77	Seine-et-Marne	Pays de Biere et Foret de Fontaine	Tomato	4.82	788.95	380.274
77329	77	Seine-et-Marne	Goele et Multien	Tomato	0.2	788.95	15.779
77335	77	Seine-et-Marne	Brie Champennoise	Tomato	0.18	788.95	14.2011
78053	78	Yvelines	Plaine de Versailles	Tomato	0.16	83.27	1.33232
78332	78	Yvelines	Vallee de la Seine	Tomato	0.98	83.27	8.16046
91055	91	Essonne	Hurepoix	Tomato	0.15	472.92	7.0938
91333	91	Essonne	Ceinture de Paris	Tomato	2.26	472.92	106.88
95329	95	Val-d'Oise	Vieille France	Tomato	0.43	222.25	9.55675
77060	77	Seine-et-Marne	Brie Est	Sunchoke	0.15	400.7	6.0105
77061	77	Seine-et-Marne	Vallees de la Marne et du Morin	Sunchoke	1.43	400.7	57.3001
77329	77	Seine-et-Marne	Goele et Multien	Sunchoke	0.02	400.7	0.8014
78054	78	Yvelines	Yvelines	Sunchoke	0.05	411.2	2.056
78332	78	Yvelines	Vallee de la Seine	Sunchoke	0.28	411.2	11.5136
91342	91	Essonne	Beauce	Sunchoke	0.02	402.7	0.8054
45342	45	Loiret	Beauce	Clover	10.7	66.8	71.476
51335	51	Marne	Brie Champennoise	Clover	12.6	107.7	135.702
77056	77	Seine-et-Marne	Orxois	Clover	20.69	87	180.003
77057	77	Seine-et-Marne	Brie Boisee	Clover	32.02	87	278.574
77058	77	Seine-et-Marne	Brie Centrale	Clover	24.07	87	209.409
77059	77	Seine-et-Marne	Montois	Clover	7.46	87	64.902
77060	77	Seine-et-Marne	Brie Est	Clover	61.09	87	531.483
77061	77	Seine-et-Marne	Vallees de la Marne et du Morin	Clover	72.12	87	627.444
77062	77	Seine-et-Marne	Brie Humide	Clover	55.21	87	480.327
77064	77	Seine-et-Marne	Pays de Biere et Foret de Fontaine	Clover	23.45	87	204.015
77320	77	Seine-et-Marne	Bassee et Basse-Yonne	Clover	71.97	87	626.139
77329	77	Seine-et-Marne	Goele et Multien	Clover	42.89	87	373.143
77335	77	Seine-et-Marne	Brie Champennoise	Clover	17.59	87	153.033
77336	77	Seine-et-Marne	Tardenois	Clover	47.86	87	416.382
77337	77	Seine-et-Marne	Brie Francaise	Clover	13.72	87	119.364
77338	77	Seine-et-Marne	Gatinais Pauvre	Clover	24.53	87	213.411
77339	77	Seine-et-Marne	Gatinais Riche	Clover	4.3	87	37.41
78053	78	Yvelines	Plaine de Versailles	Clover	20.56	84	172.704
78054	78	Yvelines	Yvelines	Clover	73.22	84	615.048
78055	78	Yvelines	Hurepoix	Clover	21.23	84	178.332
78332	78	Yvelines	Vallee de la Seine	Clover	26.62	84	223.608
78334	78	Yvelines	Drouais	Clover	4.63	84	38.892
78342	78	Yvelines	Beauce	Clover	16.56	84	139.104
89317	89	Yonne	Champagne Crayeuse	Clover	12.04	62	74.648
91055	91	Essonne	Hurepoix	Clover	62.34	82	511.188
91333	91	Essonne	Ceinture de Paris	Clover	44.63	82	365.966
91339	91	Essonne	Gatinais Riche	Clover	35.14	82	288.148
91342	91	Essonne	Beauce	Clover	21.49	82	176.218
95329	95	Val-d'Oise	Vieille France	Clover	8.5	87	73.95
10335	10	Aube	Brie Champennoise	Sunflower	12.43	25	31.075
27080	27	Eure	Plateau de Madrie	Sunflower	5.32	30	15.96
27330	27	Eure	Vexin	Sunflower	4.32	30	12.96
28342	28	Eure-et-Loir	Beauce	Sunflower	28.89	26	75.114
45339	45	Loiret	Gatinais Riche	Sunflower	57.56	26	149.656
45342	45	Loiret	Beauce	Sunflower	19.04	26	49.504
60041	60	Oise	Pays de Thelle	Sunflower	7.55	33	24.915
60329	60	Oise	Valois et Multien	Sunflower	32.1	33	105.93
60330	60	Oise	Vexin	Sunflower	7.78	33	25.674
77045	77	Seine-et-Marne	Butte de Dammartin	Sunflower	27.46	29	79.634
77056	77	Seine-et-Marne	Orxois	Sunflower	482.08	29	1398.03
77057	77	Seine-et-Marne	Brie Boisee	Sunflower	176.48	29	511.792
77058	77	Seine-et-Marne	Brie Centrale	Sunflower	373.88	29	1084.25
77059	77	Seine-et-Marne	Montois	Sunflower	91.05	29	264.045
77060	77	Seine-et-Marne	Brie Est	Sunflower	281.79	29	817.191
77061	77	Seine-et-Marne	Vallees de la Marne et du Morin	Sunflower	684.27	29	1984.38
77062	77	Seine-et-Marne	Brie Humide	Sunflower	1020.12	29	2958.35
77064	77	Seine-et-Marne	Pays de Biere et Foret de Fontaine	Sunflower	579.5	29	1680.55
77320	77	Seine-et-Marne	Bassee et Basse-Yonne	Sunflower	1151.39	29	3339.03
77329	77	Seine-et-Marne	Goele et Multien	Sunflower	392.58	29	1138.48
77335	77	Seine-et-Marne	Brie Champennoise	Sunflower	305.11	29	884.819
77336	77	Seine-et-Marne	Tardenois	Sunflower	125.48	29	363.892
77337	77	Seine-et-Marne	Brie Francaise	Sunflower	86.88	29	251.952
77338	77	Seine-et-Marne	Gatinais Pauvre	Sunflower	1051.47	29	3049.26
77339	77	Seine-et-Marne	Gatinais Riche	Sunflower	1145.02	29	3320.56
78053	78	Yvelines	Plaine de Versailles	Sunflower	68.08	26	177.008
78054	78	Yvelines	Yvelines	Sunflower	354.99	26	922.974
78055	78	Yvelines	Hurepoix	Sunflower	57.85	26	150.41
78330	78	Yvelines	Vexin	Sunflower	26.51	26	68.926
78332	78	Yvelines	Vallee de la Seine	Sunflower	126.86	26	329.836
78333	78	Yvelines	Ceinture de Paris	Sunflower	0.38	26	0.988
78334	78	Yvelines	Drouais	Sunflower	172.97	26	449.722
78342	78	Yvelines	Beauce	Sunflower	68.78	26	178.828
89317	89	Yonne	Champagne Crayeuse	Sunflower	108.16	22	237.952
89320	89	Yonne	Bassee et Basse-Yonne	Sunflower	27.32	22	60.104
89338	89	Yonne	Gatinais Pauvre	Sunflower	35.56	22	78.232
91055	91	Essonne	Hurepoix	Sunflower	218.54	28	611.912
91337	91	Essonne	Brie Francaise	Sunflower	71.7	28	200.76
91339	91	Essonne	Gatinais Riche	Sunflower	554.26	28	1551.93
91342	91	Essonne	Beauce	Sunflower	745.98	28	2088.74
95329	95	Val-d'Oise	Vieille France	Sunflower	78.26	25	195.65
95330	95	Val-d'Oise	Vexin	Sunflower	803.13	25	2007.83
95332	95	Val-d'Oise	Vallee de la Seine	Sunflower	28.21	25	70.525
95333	95	Val-d'Oise	Ceinture de Paris	Sunflower	58.98	25	147.45
77056	77	Seine-et-Marne	Orxois	Truffle	0.53	0	0
77058	77	Seine-et-Marne	Brie Centrale	Truffle	0.49	0	0
77059	77	Seine-et-Marne	Montois	Truffle	1.26	0	0
77062	77	Seine-et-Marne	Brie Humide	Truffle	1.26	0	0
77064	77	Seine-et-Marne	Pays de Biere et Foret de Fontaine	Truffle	4.35	0	0
77320	77	Seine-et-Marne	Bassee et Basse-Yonne	Truffle	5.63	0	0
77335	77	Seine-et-Marne	Brie Champennoise	Truffle	0.88	0	0
78334	78	Yvelines	Drouais	Truffle	0.54	0	0
91339	91	Essonne	Gatinais Riche	Truffle	1.32	0	0
2336	02	Aisne	Tardenois	Triticale	34.3	63	216.09
27080	27	Eure	Plateau de Madrie	Triticale	6.2	59	36.58
27330	27	Eure	Vexin	Triticale	4.09	59	24.131
28334	28	Eure-et-Loir	Drouais	Triticale	14.6	55	80.3
45338	45	Loiret	Gatinais Pauvre	Triticale	4.89	48	23.472
60329	60	Oise	Valois et Multien	Triticale	13.74	64	87.936
77057	77	Seine-et-Marne	Brie Boisee	Triticale	20.7	67	138.69
77058	77	Seine-et-Marne	Brie Centrale	Triticale	34.35	67	230.145
77059	77	Seine-et-Marne	Montois	Triticale	4.81	67	32.227
77060	77	Seine-et-Marne	Brie Est	Triticale	165.3	67	1107.51
77061	77	Seine-et-Marne	Vallees de la Marne et du Morin	Triticale	242.92	67	1627.56
77062	77	Seine-et-Marne	Brie Humide	Triticale	71.57	67	479.519
77064	77	Seine-et-Marne	Pays de Biere et Foret de Fontaine	Triticale	274.02	67	1835.93
77320	77	Seine-et-Marne	Bassee et Basse-Yonne	Triticale	14.39	67	96.413
77329	77	Seine-et-Marne	Goele et Multien	Triticale	21.08	67	141.236
77335	77	Seine-et-Marne	Brie Champennoise	Triticale	31.11	67	208.437
77336	77	Seine-et-Marne	Tardenois	Triticale	220.46	67	1477.08
77337	77	Seine-et-Marne	Brie Francaise	Triticale	85.3	67	571.51
77338	77	Seine-et-Marne	Gatinais Pauvre	Triticale	21.91	67	146.797
77339	77	Seine-et-Marne	Gatinais Riche	Triticale	54.09	67	362.403
78053	78	Yvelines	Plaine de Versailles	Triticale	149.22	61	910.242
78054	78	Yvelines	Yvelines	Triticale	311.69	61	1901.31
78055	78	Yvelines	Hurepoix	Triticale	83.66	61	510.326
78332	78	Yvelines	Vallee de la Seine	Triticale	26.35	61	160.735
78333	78	Yvelines	Ceinture de Paris	Triticale	29.94	61	182.634
78334	78	Yvelines	Drouais	Triticale	143.11	61	872.971
78342	78	Yvelines	Beauce	Triticale	46.16	61	281.576
89317	89	Yonne	Champagne Crayeuse	Triticale	18.79	45	84.555
91055	91	Essonne	Hurepoix	Triticale	129.57	61	790.377
91333	91	Essonne	Ceinture de Paris	Triticale	7.97	61	48.617
91337	91	Essonne	Brie Francaise	Triticale	6	61	36.6
91339	91	Essonne	Gatinais Riche	Triticale	193.21	61	1178.58
91342	91	Essonne	Beauce	Triticale	361.88	61	2207.47
95330	95	Val-d'Oise	Vexin	Triticale	49.84	60	299.04
95333	95	Val-d'Oise	Ceinture de Paris	Triticale	5.09	60	30.54
77058	77	Seine-et-Marne	Brie Centrale	Triticale	1.95	67	13.065
77060	77	Seine-et-Marne	Brie Est	Triticale	9.8	67	65.66
77061	77	Seine-et-Marne	Vallees de la Marne et du Morin	Triticale	51.72	67	346.524
77064	77	Seine-et-Marne	Pays de Biere et Foret de Fontaine	Triticale	12.16	67	81.472
77336	77	Seine-et-Marne	Tardenois	Triticale	21.73	67	145.591
77337	77	Seine-et-Marne	Brie Francaise	Triticale	10.03	67	67.201
77339	77	Seine-et-Marne	Gatinais Riche	Triticale	5.54	67	37.118
78342	78	Yvelines	Beauce	Triticale	0.58	61	3.538
91055	91	Essonne	Hurepoix	Triticale	7.09	61	43.249
91339	91	Essonne	Gatinais Riche	Triticale	117.09	61	714.249
91342	91	Essonne	Beauce	Triticale	109.18	61	665.998
77059	77	Seine-et-Marne	Montois	TemporaryGrassland	2.81	87	24.447
77062	77	Seine-et-Marne	Brie Humide	TemporaryGrassland	3.68	87	32.016
77329	77	Seine-et-Marne	Goele et Multien	TemporaryGrassland	1.58	87	13.746
77336	77	Seine-et-Marne	Tardenois	TemporaryGrassland	10.76	87	93.612
[truncated: 51,531 more rows]

## Sheet: Data Reg Agri
DEP_ID	01
Somme de Production	Étiquettes de colonnes
Étiquettes de lignes	Bresse	Bugey Quatre Cantons	Coteaux en Bordure des Dombes	Dombes	Montagne du Jura	Vallee de la Saone	Zone d Elevage du Pays de Gex 2e Z	Zone Forestiere du Pays de Gex 1re	Total général
Alfalfa	4489.19	4893.22	1757.26	2295.75	886.77	1166.19	327.45	910.252	16726.1
Aroma	0	0	0	0	0	0			0
Artichoke			1.677			11.911			13.588
Barley	25172.8	7610.5	7729.45	16767.7	1123.1	5067.1	780.401	1091.31	65342.3
Buckwheat	467.567	56.781	158.776	562.482		88.2559	7.7811		1341.64
Butternot	112.955	79.745	14.555	26.855	2.05	34.85	3.075	9.02	283.105
Cabbage	105.343	33.5924	371.637	722.726		627.493			1860.79
Carrot	1878.49			398.12		3129.46			5406.07
Celery	108.052					528.122			636.174
CerealMix	2583.82	2125.78	147.21	1439.99	354.075	221.025		132.138	7004.04
ChickPea	9.6485	0.874				8.51			19.0325
Clover	1207.32	244.437	186.971	1273.1	101.244	106.141	18.467	16.992	3154.67
Condiment			36.8032	41.552					78.3552
DurumWheat	177.366	96.3707	23.124	88.765		59.04			444.666
Faba	737.872	28.896	157.2	1193.25		162.064	22.304		2301.58
Flax	163.995	61.05	22.215	65.4					312.66
FodderBeet	66.8537								66.8537
FodderCabbage	1202.69	1140.92	216.85	978.371					3538.83
FodderFaba	8.201								8.201
FodderLegumes	30.68								30.68
FodderLentil					25.842				25.842
FodderPea		38.409							38.409
FodderRadish	19913.6	3265.65	2647.68	7314.2		2763.74	2126.42	344.11	38375.4
FodderRoots		51.9219							51.9219
GardenPea						2.88816			2.88816
Garlic			5.32						5.32
Grassland	19089.9	5838.99	1421.01	7891.09	1698.57	1378.9	363.471	1238.68	38920.6
GreenBean	12.621		1054.11	133.152					1199.88
Hemp	0.73521	16.3147	16.7464	23.375					57.1713
Hop	14.118								14.118
IndustrialTomato						124.2			124.2
Leek	1396.08		307.8	119.88		3022.92			4846.68
Lentil	13.8718	12.2937	8.0625	1.7587		5.031	15.2607	3.5862	59.8646
Lettuce	216.522		335.05	2141.82		1899.31			4592.7
Lupine	4.29			38.61					42.9
Maize	109444	30124.8	61369.2	86029.7	336.418	42740.6	1828.03	1710.2	333583
MaizeFodder	58777.2	6467.91	833.184	15463.5	2879.43	5146.91	3696.62	4722.43	97987.2
MaizeIrrigated	172298	47425.8	96614	135437	529.625	67286.9	2877.88	2692.38	525162
Melon	30.912		96.264						127.176
Millet	42.6208			6.3791		27.8297			76.8296
NaturalGrassland	124060	116392	9656.91	27110	89253.7	17418.9	5328.23	26716.6	415936
Oat	709.432	349.875	50.679	944.555	24.709	142.449		11.137	2232.84
OleoMix				4.675					4.675
Onion	49.4733			179.903			3.21255		232.589
OtherCereals	17.2446	35.6809		54.2574	18.2961	2.3133		7.01	134.802
OtherFodder	76.9606		57.3836			76.8813		21.4	232.625
OtherGrassland	650.808	9170.65		8.418	4094.18		1032.19	10723.9	25680.2
OtherPea	1.22757	2.17413	1.0353	1.25715					5.69415
Parsnip	170.94					63.64			234.58
Pea	500.016	213.994	62.304	268.862		94.248	30.558	46.222	1216.2
PeaMix	142.002	48.762	28.314	115.29		1.332			335.7
PoliphytedGrassland	6317.23	3681.46	761.461	2397.66	1347.41	971.249	53.658	507.167	16037.3
PoorPastures	56.5914	130.633	10.6912	32.4077	79.3359	19.1465		197.248	526.053
PotatoConsumption	2202.47	126.905	1171.11	3391.2	34.6376	3315.36	78.5318	29.2628	10349.5
Pumpkin			21.935	73.595		36.285			131.815
Radish	137.62					265.3			402.92
Rapeseed	6590.36	1558.87	3602.61	12680.7	96.458	3789.54	319.906	244.188	28882.6
Raygrass	14561.8	727.689	346.88	4082.4	187.098	1287.68	762.973	891.807	22848.3
RedBerry	273.12	61.8		1.32	2.28				338.52
Rye	2276.99	683.97	357.84	1748.88	77.322	312.438	21	43.05	5521.49
SoftWheat	82264.4	15621	26352.2	68409.4	733.492	30040.4	5551.66	5433.52	234406
Soja	6508.84	3714.52	3714.22	4158.15	45.379	1069.89	71.898	110.607	19393.5
Sorghum	978.075	461.835	542.97	854.685	182.52	1072.71	27.99	102.78	4223.56
Spelt	634.392	217.8	150.546	113.52		43.56			1159.82
Spinach	3.978		118.269	724.302					846.549
Strawberry	10.494	2.385						2.544	15.423
SugarBeet	4.9656	37.7386		3339.53		375.73			3757.97
Sunchoke	2.6874				0.2986				2.986
Sunflower	3120.91	2109.12	2438.33	6935.29		1580.2	98.28	90.142	16372.3
SweetCorn				38.8814		111.228			150.109
TemperateFruits	11.7192	59.166	2.6904	10.4652	0.0684	51.0264	4.0584	4.6056	143.8
TemporaryGrassland	29437.9	12901.9	3576.87	22483.6	3840.42	4637.83	1132.29	2221.56	80232.3
Tomato		4.5				34.2			38.7
Triticale	7963.29	4779.47	962.88	4090.18	1475.18	800.984	52.156	358.897	20483
Truffle		0			0				0
Turnip	36.8					37.26			74.06
Walnut		4.824							4.824
Watermelon			67.818						67.818
Zucchini	6.765	27.675		29.725					64.165
Total général	709557	282740	229588	444738	109430	203261	26635.7	60634.7	2.06658e+06

## Sheet: Data DEP
		100% GoToFeedForage	100% GoToFeedGrass	100% Industrial no food crop	No production data or error
	Somme de Production	Étiquettes de colonnes
	Étiquettes de lignes	01	02	03	04	05	06	07	08	09	10	11	12	13	14	15	16	17	18	19	21	22	23	24	25	26	27	28	29	2A	2B	30	31	32	33	34	35	36	37	38	39	40	41	42	43	44	45	46	47
	Alfalfa	16726.1	34669.7	44474	21894.8	18549.8	351.395	17367.4	101412	19820.5	139416	30873.5	123441	17898.3	15162.5	5106.82	50193.6	36788.7	61091.9	4037.83	136874	6852.17	7182.67	61967.3	10598.3	59417.6	26092.4	25278.7	6099.37	363.815	7035.42	32828.7	55291.6	91236.7	5250.1	12574.8	38391.8	47251	44548	37898.8	14202.6	1774.17	14616.3	11154.1	16023.2	12019.4	20036.1	38859.4	37483.9
	Aroma	0	59.9892	0	0	0	0	0	174.684	0	1879.06	0	0	0	0	0	285.724	503.38	10.74	0	0	0	0	0	0	0	0	278.616	0	0	0	0	0	0	0	0	0	57.78	27.11	0	0	0	43.51	0	0	0	136.841	0	0
	Aromatic			16.038	8562.71	168.098	1.45	60.951	5.19327		17.6509	88.64	30.82	94.4137			65.8741	183.885	1.66926		62.2574	5.31692	30.0468	1.04		1883.41	43.6791	493.105				160.89	3.58	42.92	0.297	100.6	0.309123	42.288	0.432772	73.392		0.772808			2.838	9.504	188.163	9.86	4.29371
	Artichoke	13.588	0.384	0.473	0.11664			0.774		0.612		123.626	0.0684	246.862	3.1255		18.404	22.2344			0.326163	6021.32		0.585		13.502		8.132	6569.13	9.603	137.259	21.1688	18.3522	10.982	18.3918	28.3737	8.98807		2.7041	0.903		0.0825				0.33363		1.8975	74.5513
	Avocado																													11.58	351.48											2.28705
	Barley	65342.3	378369	63285.4	14205.2	12510.2	82.6445	6078.23	240295	9416.83	631993	23496.9	81560.6	6083.94	177361	5951.78	99320.4	165491	312387	5905.04	357486	186290	25647.3	44843	35044.8	32338.7	309824	665529	204677	156.674	1769.03	10679.3	58691.9	61877	6755.09	5736.54	129673	267649	170576	45322.3	54778.9	2737.2	203726	21102.2	20442.1	93246.6	483313	30944.5	40228.9
	Buckwheat	1341.64	1829.05	5978.83	24.8452	20.3831		85.5472	1469.94	990.51	2712.39	685.85	1543.08	7.9056	2060.01	145.598	5737.11	1974.82	8436.4	2066.6	8751.02	15422.3	7766.45	2735.87	44.3744	375.404	1674.27	7164.37	15325.8			7.2732	5897.77	11830.7	885.892	166.4	12592.6	8210.12	3681.81	2203.99	107.916	1297.64	5512.27	384.08	1083.71	11746.7	4531.01	820.197	1659.9
	Butternot	283.105	331.163	602.74	14115.4	157.224	7.164	156.415	16.3586	52.53	744.863	492.815	27.032	8531.22	278.642		413.808	161.557	304.26	20.7886	449.001	886.26	10.848	979.695	29.889	3957.93	27.8272	69.9163	1282.7	21.006	228.875	4533.28	259.889	1538.64	107.01	616.688	230.248	403.48	5399.71	602.29		463.71	1687.26	182.655	236.682	297.342	293.216	423.141	9584.98
	Cabbage	1860.79	51.623	0.244	10.285		3.6	50.6859	288.005		2263.62	201.446	9.41535	1437.86	837.54	16.47	43.7462	605.963	0.877267	301.086	415.734	66704.3	12.936	43.07	0.3675	489.204	109.199	4267.52	82980.6			34.7306	607.732	136.452	73.5	53	26459.7	2.506	33.464	44.3578	3.172	885.162	276.945	342.486	22.295	1251.21	67.3457	6.60825	1751.04
	Carob																					0.975														3.70152
	Carrot	5406.07	31793.3	378.162	347.1	1.3	16.215	172.42	969	31.3089	21989.4	2454.74	37.929	2627.7	5601.56	28.14	657.562	902.144	6964.26	45.9	952.758	3565.2	96.2752	48.608	49.2443	2464.94	1680.71	22611.2	25475.5	103.822		1540.76	1403.36	3072.04	67820.4	5564.27	11483.9	3260.56	652.837	5.18	1.572	83027.6	12450	158.73	51.0278	6107.27	13018.7	90.686	2567.98
	Celery	636.174			15.81				248.708		3083.35	861.865		1119.72	1993.94		6.325	613.172	1.043		808.346	334.2		1			355.241	481.848	2300.4			77.1579	434.829	284.886			5981.39	246.096	1.84332	55.692	4.30997		67.9408	10.71	4.628	1156.73	280.592		151.75
	CerealMix	7004.04	4350.61	23205.6	1009.85	1383.77	12.0474	1350.19	8070.67	1966.8	1616.91	1010.02	45466.8	218.29	10556.5	5452.49	6986.3	3799.01	5085.58	5377.73	7339.36	11262.9	18341.5	5913.06	5108.66	1906.65	2959.08	2924.65	5455.77			189.187	3475.07	6462.74	2049.2	545.184	16960.6	11330.7	5042.38	6543.89	9711.62	334.437	3905.69	7524.64	9527.61	38210.4	4834.74	8058.11	4030.3
	Cherry		0.03417					46.0435				41.8946		227.664							1.05678					15.198	0.864				2.988	397.212				66.1762				276.818		0.966							3.20716
	Chestnut				38.5388	0.661892	21.2288	3466.58		0.15		11.38	94.9			24.8448	212.304	21.168	1.28833	1221.26		11.4195	22.5556	1628.58		217.042		0.588	8.69162	112.796	120.189	237.46	10.01	3.12	40.068	68.46	2.1625	1.368	9.657	23.94	0.0118195		12.6655	0.918	1.07558	1.464	0.228	373.82	186.606
	ChickPea	19.0325	85.728	11.4243	378.756	52.176	1.548	72.0048	7.315	54.99	58.5	739.706	14.02	1074.62	26.8128	1.989	2691.51	2042.12	192.678		141.218	1.414	0.579204	108.54		267.534	90.8792	199.258				831.42	673.47	2612.29	25.001	1169.8	1.53	265.651	183.553	51.04	5.33998	3.75776	77.9904	5.607	5.355	3.713	146.596	92.32	523.32
	Citrus						59.0711	13.6236		20.4354		89.32		147.112			0.439471	3.0763				3.95524		0.659207		129.205			64.3825	529.92	62573	56.0326	0.659207			185.741		52.7366				17.5788	1.75788				27.2472		13.8433
	Clover	3154.67	3669.8	19893.5	786.285	2208.3	19.14	2002.44	13038.6	3282.23	13260.4	1937.06	9277.7	834.117	10028.1	1416.45	8761.6	3668.98	30991.1	954.432	39138.1	2895.62	5342.4	14109.2	2617.12	4192.48	3108.47	7362.36	1418.39	56.8842	328.785	1850.68	14379.2	29761.5	1709.48	616.924	13986.7	33018.6	21018.9	3650.03	3859.28	4553.58	10495.3	1842.19	3547.79	11011.8	5919.55	2379.02	6488.55
	Condiment	78.3552	494.736	7.0159	1515.59	31.8905	1.9833	548.835	1045.69	564.142	808.902	6320.21	0.637809	788.48	42.368		735.872	219.401	4526.78	34.4417	346.968	2466.1	73.667	992.75		6248.11	347.766	5024.48	4319.98	83.3936	31.6635	501.9	6353.12	24343.7	1.0667	207.607	26.88	9732.16	1383.09	329.441	62.8242	2441.06	824.475	71.818	30.7743	155.889	2849.84	988.378	1812.58
	Cucumber			579.392	2.147		0.6768	45.3999				0.87875		6183.85			7.61868	21.586	164.524	146.228	1.972	642.865		13.057		439.11		703.57	1750.53	3.0852	63.7004	438.383	104.362	671.736		12.129	394.084		1189.67	29.6173		12.66	2998.26	4.0515		130.185	1042.52		431.707
	DurumWheat	444.666	1503.46	925.445	21557.4	766.473	4.84884	3161.82	370.27	9412.45	777.205	75848	523.064	39943.1	1077.22	202.6	14967.9	109573	14042.6	182.32	444.174	651.287	376.533	1379.7	195.706	47861.1	3550.62	312060	482.741		209.04	36480.5	131426	53849	3212.59	19087	286.174	9006.01	9969.35	2431.2	187.57	25.11	88595.2	374.066	345.535	669.821	163414	544.698	1136.26
	Eggplant				7.826	1.2	4.16	16.3775	1.77275					1209.11			12.078	54.0463	2.282	62.3052	1.77331			9.2		91.7496		25.102	26.1057	20.67	25.6906	117.947		103.007		35.2779	10.971			2.75303		12	6.2744	6.606		302.101			416.8
	Endive		13903.9	26.1696	414.319	7.79095		8.59002	18.1789		942.021	571.336		60.9292	1633.98		50.3415	159.814			0.399536	99.308	19.5773	2.99652		172.2	183.75	3417.43	5408.92			499.619		259.698			50.041	96.8874	1.19861	270.885			1897.79				467.057	4.9942	165.807
	Faba	2301.58	12538.7	642.422	124.362	6.3	0.0434864	49.5	2780.28	1882.57	4829.88	1106.95	322.07	117.315	17928.1		4910.72	6764.23	6850.42	30.34	3746.01	10950.7	312.892	3499.38	62.356	701.4	16798.3	12186	4491.9	0.173945	2.15	219.408	3524.1	9256.59	1770.91	388.726	7975.98	7997.92	12878.2	276.048	880.243	2232.18	7560.27	111.168	13.29	8199	9310.87	324.335	5614.08
	Fennel				2830.76		0.39666	0.159452		6.05919	402.298	296.003	2.07288	74.14			15.9452	40.1462	0.225		77.9722	210.56				211.244	2545.34	823.76	610.4	12.2778	0.303	73.92	115.653	120.436		1.59452			205.853	25.5128						235.859			163.444
	Flax	312.66	961.531	433.77	4.24	8.833			1567.46	44.24	1024.91	532.896	29.764		605.79		1881.9	2893.98	3963.56		2093.43	164.257	313.973	229.914	67.13	62.186	1602.03	4738.99	621.72			10.85	1205.83	1150.01	84.286	27.6	371.984	4120.6	4110.56	242.318	232.106	14.144	2875.78	7.53	105.042	566.918	1692.75	18.967	579.598
	FodderBeet	66.8537	3038.32	1888.21	95.6992		2.03615	260.82	6905.95	342.413	1003.48	762.879	1127.01	562.318	21926.7	1012.65	900.3	2431.08	2079.28	221.262	2114.54	50404.1	303.047	563.38	12486.7	23.8336	28105	4198.73	59826.2			209.724	511.753	3003.66	59.0484	1.01808	34814	1478.2	3091.39	166.965	7875.5	195.81	3057.1	133.403	433.81	15434.1	415.34	877.582	1084.8
	FodderCabbage	3538.83	1450.02	133.399		47.1709		262.591					1806.07		2836.2	234.158	162	986.4	1025.35	75.3377	218.547	6512.7	12.2169	1419.84	141.852	365.926	2060.59	3469.45	11854.7					281.668			9170.12	19	2100.07	2108.78			301.34	3482.69	989.882	1219.92	4848.8	133.368	11.1
	FodderCarrot							41.216							4.2																								75.76						5.254
	FodderFaba	8.201	144.171	19.1786				3.8125	159.58	46.989	132.131	27.0745	110.246	77.004	982.872		613.312	308.772	330.51	30.096	115.374	32.8768	39	236.592		55.969	120.714	187.378	247.543		133.669	47.844	59.5928	285.608	135.918	11.781	11.7576	799.402	940.619	24.514	0.624	277.68	300.07	33.4224		311.599	236.338	85.2432	192.825
	FodderLegumes	30.68																			53.792					17.7139						28.9722		15.939			262.476	34.5712	180.441							61.4449		1.888	263.43
	FodderLentil	25.842			212.94			4.625			252.675	24.9148							3.588	2.736	174.332												0.2742					353.584		0.952			13.96	17.688	20.7313
	FodderLupine			23.8336				1.625				83.9466	38.3418		35.36	38.9464	261.76	12.798	49.68		15.006	40.6208	21.9	17.856	30.96		6.93	28.9744	58.473				1.3253			31.416	68.8896	193.914	124.173	22.7885	19.032			6.2832	32.9841	86.8843	90.1132	10.9504
	FodderPea	38.409	1144.49	158.642	76.05			83.5625	1083.63	29.2698	1642.12	87.3896	124.369		624.648	32.1112	693.952	782.082	963.93	15.48	1054.68	192.192	110.7	75.206	121.52	190.122	564.234	1501.49	44.603	4.9494		29.8139	87.9725	288.38	13.77	67.144	138.69	3151.75	730.929	65.6285	4.992	85.085	344.533	42.6624	45.5651	534.766	266.799	38.7512	62.19
	FodderRadish	38375.4	254115	6920.61	307.459				96268.3	5966.27	260901	1918.73	2591.34	1432.09	27660.9	124.545	48635.4	67272.1	43545.7	4684.17	32086.4	781600	3349.47	22780.3	7583.31	11181.9	154100	232290	824986			405.194	4692.99	5098.87	1585.82		423099	32180.7	40994.1	15964.5	8043.82	4904.75	56882.2	3212.9	1358.23	70924.3	170222	1156.2	12285
	FodderRoots	51.9219	1.275	5439.32	169.679			408.779		924.413	8.48397	2346.67	748.286	611.864	730.5	2.03615	121.5	344.52	265.456	117.079	341.056	12904.7	313.228	492.32		249.088			12347.5			887.084	5323.86	1430.74		631.207	7311.15	633.46	226.144		282.686			18.0559	453.264	1928.77	107.92	10204.9	653.7
	FodderTurnip							3.542				92.3056											36.9901	13.94				11.295										18.62					96.9	8.4144	7.1			1.35744
	GardenPea	2.88816	20206.5		1.5655	0.3465			933.333		755.69	2.948		10.4152	659.378		84.3074	662.01	576.226	6.776	26.1144	8158.11		128.444	15.05	195.333	1.01	12760.3	8721.75	0.858		174.937	125.687	846.837	2820.53	2.11497	1767.69	257.226	8.823	37.1959		3528.36	991.249	0.3456		1608.47	1231.55		1471.57
	Garlic	5.32			397.033	1.21	0.275	53.0856	1.665	0.721101	5.863	39.8		500.08	2.325		29.2776	42.2034		11.5933	0.495	16.7328		24.3771	0.315	7427.81	7.20747	159.005	77.9646	0.103	0.416	10.28	418.347	3878.77	27.0639	2.30752	52.7236			7.44	0.54396		99.11	0.056	2.808	0.04343	148.767	72.67	557.044
	Grassland	38920.6	3979.1	328830	7313.86	16592.6	191.268	6147.78	2684.81	7587.12	3603.7	11357.4	281111	2596.32	20506	172917	74086	22026.9	50254.7	356432	6099.94	226203	215038	98316.6	108883	15997.5	9623.75	7099.43	245538	4871.67	1278.86	2620.54	22086	51170	8491.56	9065.45	244618	391754	79611.1	17380.2	121288	21543	21154.8	53797.1	41243.1	235408	25651.6	101275	17298
	GreenBean	1199.88	12346.3	711.063	59.3113	11.046	0.52066	36.5037	257.227	520.48	104.225	814.429	0.24028	210.79	132.4		1380.82	2064.85	2170.73	9.196	275.125	20664	9.83892	170.023	1.0767	191.485	2677.66	49404.7	12716.2	4.949		74.1898	1285.22	5934.45	9878.24	6.16715	2946.77	51.532	1008.12	424.806		37587.3	8639.05	6.09462	17.1865	6702.01	13129.6	38.4288	3183.04
	Hazelnut		54.9849	43.848	1.323	2.331	0.272	5.60986	2.107	17.0815	0.33	22.6702	13.0488	1.00298	21.0647		113.176	92.246	8.26031	4.70988	0.372	33.913	1.29231	523.283		140.004	11.8664	239.988	6.1204	0.477029	114.864	0.0611575	165.117	549.53	887.607	0.83567		132.711	158.64	36.6981	6.5142	329.117	11.1016	0.54036		5.6408	300.848	208.049	6120.98
	Hemp	57.1713	830.095	19.1982	47.916		2.02744		2120.09	4.545	50764.5		37.791	10.4429	809.092		75.9153	600.749	228.124	191.916	2379.77	344.152	865.204		349.612	28.5283	654.588	667.732	120.667		12.7776	3.4416	6.55381	20.475	72.975	4.016	392.616	139.267	126.289	113.195	1323.05	69.8705	120.793	12.8363	7.51222	502.023	252.028	29.169	72.15
	Hop	14.118	9.94311		15.7953	0.51136	0.113636	2.2443	1.78976		28.4657	0.653404	2.27271	0.624996	7.81244		10.6817				16.3635	16.7044		6.78972		10.26	29.6305	10.7102	17.4999		6.96018	0.0284089	8.38062	4.03406	0.568178			1.50567		8.66	0.284089	7.13063	1.78976		0.198862	5.6192	7.07381	0.624996	39.4599
	IndustrialTomato	124.2						62.1				2349.51		110100								110.941		44890.6		59098.5						48414.9		24.9615	22740.2	2152.22				7360									154189
	LambLettuce							8.19	2.09485					79.346				1.612		1.6065								2342.34	847.772										42.016	0.168			1341	1.974		6896.95	131.648		62.15
	Lavanda		0.247298	33.858	47386.2	931.731	0.95	2592.18	0.370948	0.309123		124.98	53.98	844.881		11.0666		7.475	52.9219		109.151		0.0309123	8.8075	1.2674	28750		20977.4	1.33014			1985.04	157.58	84.14		136.98		603.841	15.0543	188.331			758.372	43.725	17.292		126.277	387.2	20.511
	Leek	4846.68	151.413		17.5178	1.735	0.44689	11.52	228.501		375.067	244.048	3.393	78.3072	21.97		267.393	341.024	7.584	22.5036	32.314	1373.76		62.016	52.0704	615.96	125.172	157.892	2304.68	67.392		214.675	344.281	354.368	4494.32		4292.1	569.383	340.099	68.04	5.96926	1538.36	20085.2	1169.64	19.9024	9134.05	922.164	19.1822	445.536
	Lentil	59.8646	395.836	43.3096	187.401	142.418	1.42	12.7237	439.28	44.795	7233.86	90.747	57.625	203.308	24.0825	35.7244	461.022	745.476	1111.66		540.927	9.272	10.125	42.606	7.077	41.4477	488.338	7735.55	6.48		1.89698	81.192	236.35	932.805	9.405	17.4488	66.56	3783.11	792.242	60.114	15.0108	21.78	1320.44	10.5522	1093.16	128.65	2980.69	15.7	260.442
	Lettuce	4592.7	1385.47		1218.25	15.3	5.73189	2.39327	468.04			137.232		11787.5	2731.59		60.0745	303.264	679.988		8.75679	1329.28		76.585	17.1348	389.1	172.68	323.641	8818.98	14.52	236.434	3824.57	2924.17	55.65	57.77	2007.12	4398.51		486.301	278.905	2.041	343.97	2.6915	471.011	3.36	2551.33	3696.58	40.61	2898.04
	Linen		26915.3						1914.78		938.789				65438.4							235.095	32.3202				139111	3408.36	497.918				37.6252						217.979				687.477		32.2502		592.721		3.01403
	Lupine	42.9	23.31	62.348				2.016	28.1917	2.46599		4.172	62.832		97.557	2.198	618.822	34.416	296.34	0.292575	61.292	122.915	99.126	89.49		3.598	287.67	112.23	105.84			1.716	29.946	53.4577		3.80348	815.277	206.184	177.215	8.658	7.024	73.098	64.714	8.06	6.227	907.35		1.83905	2.23611
	Maize	333583	142603	207483	6521.2	1706.06		4174.48	124821	34108.9	50534.4	9673.7	6716.13	7048.14	62245.5	530.46	198051	373974	172135	12342	56748.7	310915	6596.82	145168	25738	118383	47052.8	352699	399980	299.6	4324.1	2327.93	152102	313011	214683	1981.19	234134	62555.5	97488.6	195710	71617	795644	144880	16119.5	878.62	75838.8	330479	18844.5	265505
	MaizeFodder	97987.2	196035	83736.3	74.844	3098.63		6253.28	203043	11591.6	35834.9	2076.46	54677.4		472227	45772.3	61864.4	60657.8	21300.7	32762.9	57458.3	819423	95787.2	63884.2	35980.5	8141.75	145163	37052.6	700221				20629	5863.52	16608.7	118.104	966036	35749.8	62635.2	73322.6	15423.4	13193.5	47145.1	91753.7	69636.8	427159	20736.3	19694.7	33669.5
	MaizeIrrigated	525162	199724	237494	7391.32	2270.96		5971.66	146415	69432.9	67479.2	21634.5	10024.1	8074.19	95615.2	948.159	275071	483196	226436	18149.9	79716.6	326658	10445	201343	37565.5	163782	70019	406179	384597	299.6	4324.1	3023.28	241431	437939	271914	3761.76	244547	86691.1	164745	277196	93862.4	1.1334e+06	181308	19046.6	1166.31	113962	372954	30448.9	342146
	Melon	127.176		17.336	6559.05	15.03		128.898	0.92668			9420.64		54859			767.55	5605.07	1.07593	9.2485	0.281	1.008		99.9536		1651.78	8.991	9.88	14.5424	59.4639	1760.33	41513.6	211.125	17151.2	48.9879	22733.4	2.7327	17	7478.77	47.6174		19.38	1649.06	1.08		31.0639		6397.93	8242.52
	Millet	76.8296	67.8807	318.189	41.5638	7.7982		30.0594		24.3723	514.257	11.9642	17.01	54.432	84.1788	13.6484	3290.74	2861.68	10056		649.512		56.7798	318.474	12.169	130.13		6006.68	39.1855			5.7266	74.948	418.951		11.456	31.5923	14691.9	16676.2	383.152	160.82	74.2352	20129.6	26.16	12.7264	347.108	6769.67	32.8671	163.526
	Mint			37.4713	78.7694	17.0614	2.77662	27.2663	32.6877		14.6696	113.315		53.9			162.004		0.525	0.637809	7.0159	1.12	0.956714	0.637809		969.527	347.447	329.68	3.5	5.89974		123.06		15.641	1.81339	15.9452				243.261		43.371			5.74028	50.7	110.4	31.1017	3.67443
	NaturalGrassland	415936	304100	1.08706e+06	45482	72927	4600.66	193226	594317	201637	126756	29864.3	637753	92738.1	595742	1.46113e+06	234839	189575	548886	624937	660567	82749.4	1.04503e+06	437855	718091	84445.4	239631	95277.8	102675	50350	42581.3	20024.2	202781	106398	152610	17195.5	136783	385137	136128	457089	406482	76683.9	124434	533505	561225	358438	93589.8	169807	103720
	Oat	2232.84	13892.3	4031.15	1027.16	1086.78		270.424	12974.1	480.766	8854.46	1951.24	2486.35	543.34	15992.8	209.82	6851.05	3214.96	10459.3	665.167	14992.4	22380	3324.91	5121.84	1050.35	832.543	5216.16	4313.49	4502.61	103.749	414.69	404	2072.31	6422.74	873.804	526.73	3825.43	10354.5	3124.2	1351.12	753.984	738.812	2229.59	369.33	964.248	7736.49	3174.84	1669.79	1025.7
	OleoMix	4.675		10.3032								1.8573			18.819		31.536				1.2593								5.8188					9.9648				92.3853					4.958						51.6442
	OliveTree				1467.07	6.132	681.122	243.65				888.242		5344.55				4.57776		0.40171				1.488		1108.77	1.84536	6.67843		63.6182	721.162	1600.46	5.02665	31.3882	7.908	1313.1			0.1343	1.38088								17.2955	6.73127
	Onion	232.589	141340	450.865	305.885	8.68	10.5472	250.03	4052.8	26.27	20926.4	2680.99	3.552	101.626	2220.2		924.352	659.835	1583.6	46.02	9561.69	3086.73	1.705	20.96	21.8	5447.43	175.748	64697.1	53305.2	34	20.2439	373.407	674.986	1591.84	20.829	142.853	1806.12	351.6	170.06	100.017	1799.2	118.8	6913.2	99.1978	37.878	954.294	37717.1	70.6901	3787.63
	OtherCereals	134.802	226.026	345.321	1695.88	894.194	4.4232	96.5353	652.456	64.4859	67.694	88.0066	337.738	111.154	257.843	111.752	395.752	721.382	4513.77	103.698	3586.9	737.597	77.9856	472.212		1404.15	859.838	2401.01	529.759	21.5265	347.262	163.981	538.712	845.15	165.133	283.68	413.119	422.565	622.121	224.655	8.636	302.032	833.443	170.64	158.588	686.03	1395.74	165.774	620.597
	OtherFodder	232.625	99	6807.17	1178.82	835.708		384.882	693.264	1919.18	548.803	391.381	8329.58	468.263	193.936	3853.18	1186.82	1152.79	732.3	545.54	2841.09	920.716	1566.24	3358.35	249.111	827.94	438.504	604.05	444.326	24.8874	50.5673	700.888	1269.49	2415.74	61.02	1657.07	538.633	1101.83	529.125	291.356	137.515	64.22	134.64	815.576	2587.57	2757.31	207.762	2060.66	486.18
	OtherGrassland	25680.2	217.776	2190.05	112305	269381	32096.9	94842.9	237.607	215458	2.2795	26047.7	175075	52655.7	60.3816	48705.8	332.606	102.296	2717.92	6745.63	3285.28	1159.9	6117.08	1995.61	338.808	108303	169.944	32.8755	8501.69	17089.5	26983.2	15422.5	63216.8	2697.16	841.058	34324.8	629.126	526.315	115.947	266392	4946.14	206.24	583.898	10081.9	13493.9	3722.57	2712.82	58913.4	532.48
	OtherOleo		340.62		0.522	0.584			581.661		4295.46	16.157	4.0128		32.841		285.984	398.749	338.356		40.4518					4.674		1450.96	12.309		27.249	11.5217	42.9632	41.5892		0.2112	2.646	874.03	46.151				956.861	0.9635	1.169	2.58	305.457	4.1292	61.4106
	OtherPea	5.69415	60.8555	39.1819	10.6449	6.65252			176.974			29.722	56.3235		176.586	1.289	131.127	8.28634	114.033		17.9929	225.843	10.7251	55.4911	0.41582	19.8952	46.4216	148.897	22.6358			0.95038	68.5468	44.1511	38.5917	7.51026	170.536	59.9398	60.1204	21.2771	27.9675		34.3684	17.9832	1.00716	140.524	12.7305	4.5384	2.124
	Parsnip	234.58		38.7746					12.6		881.4						482.386	6.5637			1.2903	506.507			1.04775	31.82	9.88874		4626.25				212.404		28.9102							33.2535	502.674	12.21		1566.82	738.56
	Pea	1216.2	26230.6	594.36	171.824	31.72		43.005	18651.1	353.144	24115.9	1903.89	301.635	74.688	10341.7	46.431	7524.66	21843	7793.43	68	16159.9	1438.24	248.768	408.765	434.376	1747.56	13169.3	24613.6	850.065		5.4	129.696	3134.91	2806.73	91.238	379.476	1636.59	11990.4	4806.91	923.85	383.812	751.906	9162.08	197.67	267.24	1375.01	10526	118.638	699.993
	PeachTree							26.7291				479.357																				1887.24				19.699				75.0484									5.20722
	PeaMix	335.7	1189.85	1907.87	59.31	9.16	12.744	32.835	482.43	1022.01	1981.98	2267.91	369.778	38.255	4443.37	132.48	3519.24	1468.13	1919.21	166.71	1323.98	5772.19	776.127	2092.18	319.696	123.788	851.904	1585.12	2219.92			12.24	7561.28	24385.4	644.336	84.18	5211.45	1881.31	2325.83	311.808	466.44	173.942	597.176	225.744	67.18	6647.61	984.515	1500.51	5695.71
	Peanut						0.199063											1.824						0.1278				0.1179							47.5608							44.03							8.2404
	Pear				3.02115	1097.52		597.42						1706.48										158.25		336.96						5859.13			1.5	345.644			61.0407	154.8									46
	Pepper			0.7155	3.534	0.48	4.14	12.8828	4.63841					529.875			2.99677	4.7892		23.016	1.12875	31.144		6.67		53.2888	2.29	53.2585	6.186	0.61374		40.9292		70.875	6.67	5.83856	5.88978		23.8777		0.792	11.02		0.7158		14.8162	364.889	29.559	972.95
	Pistachio				48.3419	1.78698		0.774				27.246		15.84			0.2256									4.248						10.4558				0.3816											1.04317	1	23.465
	Plum											11.3857												4342.93							134.201	120.753	46.2317	1205.7	1791.13	71.664				12.0942								796.546	36089.5
	PoliphytedGrassland	16037.3	9590.77	44188	15106.9	33838.4	132.835	6476.16	14837.8	9580.05	26087.3	6529.88	176028	4961.21	21584.5	19258.4	27680.5	12359.2	32422.5	13626.5	54858.3	26818.8	40040.1	19595.8	17632.6	11446.1	6034.66	21825.4	18610.4	940.715	8128.3	7082.23	27258	32169	2127.83	4877.18	47898.9	54562.8	36985.8	21314.3	11997.9	4822.07	19180.6	23860.8	36608	81880	15583.3	16615.8	10343
	PoorPastures	526.053	75.23	331.755	13112.8	1799.06	6553.92	13395.6	58.4425	8585.11	225.192	9653.75	11636	5656.78	216.359	5718.94	875.904	414.48	1512.77	780.4	155.553	400.575	534.474	776.135	45.18	9530.7	318.78	221.65	432.74	46381.9	73784.8	22661.4	1731.11	1106.8	558.348	16807.7	300.73	1567.25	929.7	13326	186.816	148.109	407.44	895.765	387.021	618.57	1108.21	16953.9	1064.6
	PotatoConsumption	10349.5	456020	1115.7	2016.31	850.643	283.005	3909.04	67363.1	877.915	367264	2166.91	3805.86	9473.51	36205.3	1247.56	2853.69	4853.01	7459.72	1280.2	19668.6	64346.5	1256.11	944.327	418.03	21343.1	130907	539068	205974	251.2	46	6136.85	1295.86	442.639	43729.9	938.79	18215.1	1083.4	2825.96	6073.59	279.9	36475.7	54786.3	7058.84	5379.12	2836.05	162893	767.812	14552.7
	PotatoStarch		124792					9.9	3123.51		20736				113.648		232.978			4.92474							14425											43.1862		81.0688						3.78826
	Pumpkin	131.815	935.207	30.8378	1170.59	109.072	5.174	19.885	78.7727		260.478	233.694	44.888	623.706	146.198	11.907	86.5854	101.443	2.904	134.075	534.057	10589.6	29.493	27.47	17.496	1117.86	30.7059	241.836	21370.7			620.169	266.122	1215.26	64.985	55.9123	977.593	9.2484	783.133	470.27	1.458	131.2	544.761		12.393	194.062	301.664	452.534	373.715
	Radish	402.92							68.88		0.36075	185.647			5.00464		3.10532	26.2013	785.856		0.249229	308.516		36.7846	0.36099	198.52	62.2317	9.97696	2018.11			84.9555	42.5083	21.009	400.715		45.4021		1.0515			145.695	153.314	7.56		3473.58	599.4		119.943
	Rapeseed	28882.6	215596	30167.1	1226.14	100.094		648.982	69288.1	3185.25	103845	8918.27	4943.84	1531.02	105887	56.088	48200.8	67832.4	143189	879.393	82830.4	79430.6	7197.43	13596.9	6706.42	9073.03	243218	408748	39492.7			2219.7	36251.5	24210.8	2303.57	801.403	68449.3	145190	122426	32637.2	13107.7	5252.93	181568	2846.76	2726.03	48016.5	116455	1349.07	17655.1
	Raygrass	22848.3	13345.6	16597.4	561.171	140.13		3879.9	4171.09	4714.07	10526	2732.38	71864.6	430.406	37469.5	2573.8	14552.4	11595.9	13628.5	4411.76	11298	208167	3538.99	14475.7	4139.22	3703.58	24445.3	12420.3	169053	32.8265	639.296	2161.71	11296	7722.75	2925.27	4249.97	213406	17899.3	16269.3	11065.9	3642.8	5909.55	14866.4	14268.6	7091.31	73726.4	8344.63	9398.46	10344.3
	RedBerry	338.52	164.2	42.12	53.5344	28.0977	23.765	500.76	20.74	104.783	8.51318	11.765	64.8885	0.724	98.1049	58.56	54.864	188.53	615.44	1646.54	858.88	70.304	228.65	295.308	34.4	679.44	197.19	925.61	49.4505	16.4244	0.945909	42.173	28.779	17.017	362.7	25.4783	131.451	33.222	503.426	1275.72	400.119	131.898	2170.8	197.64	447.96	71.757	68.208	53.4855	123.24
	Rice											792.44		53793.1								0.299367										12284.8		3.50687						7.698
	Rocket				44.5016						391.352		0.0295	781.765												1.484	38.272	1370.13	66.6067			212.108														842.856
	Rye	5521.49	9899.99	4902.91	455.371	323.064	14.768	3479.39	3664.87	188.526	3571.18	586.08	3654.73	51.562	7150.16	2347.08	1178.24	1370.63	5110.61	1447.33	5357.5	5679.37	1025.88	1097.25	2172.3	2315.71	4322.88	10522	10156.5			33.129	539.786	965.838	3869.86	115.25	10918.4	2690.86	4684.34	5507.74	981.868	2556.89	9077.47	5049.07	11020.6	4905.3	6082.25	394.432	1220.77
	Salsify		2292.63																										51.6498													8462.77	1229.65				763.75
	SoftWheat	234406	1.62045e+06	206201	8136.81	8155.86	18.081	9058.17	563208	29985.9	911013	30600.5	60816.8	6480.07	680881	23234.4	285921	467373	550497	14575.2	586402	697571	58448.5	108257	41061.5	84838.1	1.26127e+06	1.46701e+06	351765	12.5291	354.286	9761.16	198733	361760	24518	11532.6	727001	563854	648323	149537	113174	9958.61	568477	46792.7	44466.9	378642	653700	39073	306248
	Soja	19393.5	412.244	1638.25	851.235	96.325		237.204	137.472	2294.94	1530.7	2282.85	181.26	79.375	236.37		2727.5	1305.45	1552.58	34.788	19123.3	34.0582	52.308	4637.02	2785.64	6989.07	366.54	1805.86	56.756			11.552	17370.2	58763	8616.85	25.146	309.757	1140	1270.37	11364	13145.2	19050.3	1970.81	54.296	20.1	384.692	3371.97	1465.94	43168.5
	Sorghum	4223.56	1932.11	2161.07	2715.91	498.373		993.52	626.648	1467.61	6125.62	4184.84	899.01	1371.33	204.56	114.78	1271.62	3640.47	5818.59	369.943	1542.38	445.101	432.967	5692	335.754	10785.7	2113.36	4649.63	205.525		392.289	1532.17	18733.3	14256.8	1845.11	1235.23	1148.71	4346.03	12436.8	4796.14	693.312	3871.73	4617.86	1546.77	880.192	4877.79	4887.9	3395.44	25350.1
	Sorrel												0.0962													46.359			279.545			39.8794											16.5568			2.8764
	Spelt	1159.82	2451.69	5636.98	1223.28	1096.89	3.801	138.105	2906.82	915.525	2464.02	976.068	872.568	301.101	597.958	129.2	3329.13	2481.09	6780.62	369.803	7758.14	455.268	2836.45	1327.83	339.024	1842.86	1341.91	3589.5	582.857			146.37	1406.38	6954.75	103.104	6.755	618.394	4400.11	2239.78	2501.28	356.93	18.612	1298.01	358.116	1490.51	826.473	2107.32	835.59	1726.37
	Spinach	846.549	1087.7					0.459	161.33		0.15833	5.7815		1625.4	19.881		4.61175		34.7157		1.6982	2525.3				9.18	42.7409	1827.63	2679.53		0.73991	171.612		0.288		1.6688	17.8872		0.56	1.377		1.0975	201.476	11.016	15.621	6429.14	845.846		37.2402
	Strawberry	15.423	87.798	22.49	71.6	84.5184	0.96088	195.359	20.37	3.055	103.047	42.7171	4.845	555.448	138.057	4.29	20.6184	133.947	23.4784	715.53	112.218	241.369	31.553	4457.82	15.19	1962.15	178.266	38.9158	749.942	222.324	48.3982	738.674	2.93291	131.741	74.55	1419.82	186.544	15.8118	111.162	3074.01	27.776	104.235	3318.4	40.669	107.458	276.465	36.9885	145.599	5876.67
	SugarBeet	3757.97	2.06416e+06		3579.12	430.545	0.526	1461.6	457261	244.605	1.07825e+06	1834.98	25.134	1527.6	2451.56		4499.66	6287.27	11103.1		35.91	1800.09		3910.46	14.696	849.439	491206	414345	4926.92		1.926	1008.82	967.88	4285.51	328.856	34.5245	5203.42	2858.06	1667.95	1141.49	3.34	13.3532	49278.5	1.1984	14.3808	120.266	610893	1202.17	79912.1
	Sunchoke	2.986	18.8916		0.9264			0.8832	10.6184						1.1696		22.1278	8.785		45.1142		93.5374	2.8548	32.357		28.2765	0.9057		3000.58					0.2569		2.196	6.741	1.614	50.3685	13.6009	6.9	15.4641	62.04	5.04		75.222	477.365	9.975	0.7275
	Sunflower	16372.3	8669.49	32299.4	1683.27	278.967		1026	3089.12	8894.81	43748.1	24474.3	1338.57	3052.42	6015.51	15.552	74522.1	86848	76322.8	845.756	45027.1	43.082	5418.16	32439.3	706.775	10329	4346.04	9173.71	1313.57		76.76	2959.17	100041	117878	11182.4	746.88	1895.7	63088.4	68248.9	16647.8	5762.49	21070.9	25584.6	1051.92	954.216	11400.3	34247.5	6518.7	74393.3
	Swede																	3.83538				77.4747							838.67									92.8162								160.888	2.82
	SweetCorn	150.109			128.175		8.096	590.733							76.83		1138.96	39.3983	625.522		2.941	230.064		3173.04		5125.02		655.571	30.9264		1.57866	185.504	126.9	15606.8	62930.8		7.575		30.067	49.3247	58.647	257295	763.303			24.367	463.919	47.895	37547.8
	TemperateFruits	143.8	7174.33	314.408	121645	59071	163.929	5925.35	996.669	930.93	1340.8	7289.96	1632.8	110773	20284.9	84.3343	428.88	2763.49	5086.3	6506.94	220.702	3476.99	989.299	7284.3	29.809	16714.6	41632	1506.82	1609.06	663.491	6612.83	31595.8	2460.21	1111.5	1488.89	7538.99	5066.41	0	6975.43	2826.84	17.55	6090.01	468.256	1535.96	17.639	2721.54	1752.15	1313.16	14813.5
	TemporaryGrassland	80232.3	36790.3	281547	43008.3	25144.2	1102.81	19951.9	35530.7	18306.2	64261.1	22456	274372	15024.2	61427.3	130377	168444	40389.8	117308	115691	67649.6	253636	248961	98975.8	96361	32652	20196.3	82867.2	206905	180470	110357	83915.9	59657.6	68371.4	26862.4	30166	333742	233379	92682.6	59829.4	105209	41026.9	62313.8	95007.8	92003.2	443867	72158.8	75855.7	33302.5
	Tobacco		0.15	3.75									31.2758				59.3886	77.0721		5.786				177.062		43.42		100.246						56.8404	40.7548					86.94	3.42181	42.9436						63.7416	358.777
	Tomato	38.7	5.61136	7.149	100.573	55.2503	6.043	153.45	8.891	44.436		487.133	22.92	3590.84	184.728	23.85	42.441	172.388	0.334	96.397	52.5504	555.61		36.2	4.984	469.35	30.816	19.86	796.827	132	307.56	1306.52	80.3693	142.697	136.474	289.517	66.9794	2.58986	118.702	606.6	1.424	47.784	1.72657	36.258	9.0535	476.636	66.0414	23.6336	1596.78
	Triticale	20483	6677.94	80689.4	3938.88	5096.56	9	5691.82	14331	2887.3	4122.76	1869.02	28405	423.33	10078.7	18925.3	23110	3732.1	30697.4	19988.2	32119.4	58944.3	72002.4	40092	5804.64	4462.6	2885.87	7915.88	24030.4	11	927.795	426.175	7191.45	15693.6	3208.58	715.484	49307.1	41287.8	15777.8	21340.6	8042.89	5787.56	13658.6	15250.5	32499.7	44177.3	10927.1	5982.91	10841.9
	Truffle	0	0	0	0	0	0	0	0	0	0	0	0	0			0	0	0	0	0			0		0	0	0				0	0	0	0	0		0	0	0			0				0	0	0
	Turnip	74.06	35.552	23.22				28.06	5.04594		1.122	12.9536		320.04				18.4727		9.72873	7.28	123.192		2.16	1.834	556.6	13.239	303.811	2554.66				89.6114	51.948	6.12	154.444	943.776		4.89132	1.84	0.786	212.58	141.3		4.635	926.788	144.45		35.28
	Walnut	4.824	61.0523	3.33835	24.3041	230.705	0.114	19.008		43.62	48.1724	77.672	68.92	20.52	2.9202		1330.38	173.58	104.001	2172.4	4.968	8.90625	18.249	15529.9		6087.19	7.2	10.146	13.8534		2.889	21.4078	24.98	860.517	493.259	16.8286	3.496	80.897	12.4209	16032	8.51082	1.872	352.639	0.227783	0.186368	6.412	28.3799	7022.32	2286.55
	Watermelon	67.818	2.2055					9.5125			0.315071	118.472		2461.66								8.151		0.891		62.9722		8.085	25.311	49.2	412	996.73	2.7812	73.224	6.24393	323.73			94.2662	110.49		2.97				78.4338		32.436	104.959
	Zucchini	64.165	0.33689	342.487	1162.24	85.7257	32.238	341.12	18.3719		74.793	250.264		4978.09	117.926		301.071	303.285	9.174	26.8617	120.929	406.276	28.137	47.56		1418.19	34.5442	171.413	2103.62	12.837	332.378	4186.01	86.449	847.284	117.875	1353.74	260.645	488.183	713.877	177.53		44.28	3716.84	134.685	54.189	269.373	28.512	327.919	3410.38
	(vide)
	Total général	2.06658e+06	6.41966e+06	2.84562e+06	551797	544537	46565.2	429516	2.83342e+06	692406	4.14438e+06	406672	2.08714e+06	672339	2.6417e+06	1.95839e+06	1.78516e+06	2.29552e+06	2.57835e+06	1.26444e+06	2.44756e+06	4.41824e+06	1.89891e+06	1.55207e+06	1.18194e+06	1.03086e+06	3.48197e+06	5.41155e+06	4.29282e+06	304000	358787	437101	1.50414e+06	2.03102e+06	999868	229813	4.08102e+06	2.58972e+06	1.94557e+06	1.80044e+06	1.09609e+06	2.62053e+06	2.03563e+06	994217	983947	2.65342e+06	3.52805e+06	698450	1.81662e+06
[truncated: 49 more columns]

## Sheet: Regions data
num region	region
1	Idf	75 77 78 91 92 93 94 95
2	normandie	14 27 50 61 76
3	centre	18 28 36 37 41 45
4	loire	44 49 53 72 85
5	bretagne	22 29 35 56
6	hauts	02 59 60 62 80
7	est	08 10 51 52 54 55 57 67 68 88
8	bourgogne	21 25 39 58 70 71 89 90
9	auvergne	01 03 07 15 26 38 42 43 63 69 73 74
10	paca	04 05 06 13 83 84
11	occitanie	09 11 12 30 31 32 34 46 48 65 66 81 82
12	aquitaine	16 17 19 23 24 33 40 47 64 79 86 87
CORSE	2A 2B
OUTREMER	971 972 973 974 976

## Sheet: Coefficients&Calculations&Resul
		100% GoToFeedForage or Cereal	100% GoToFeedGrass	100% Industrial no food crop
		Coefficients FOR CROP PRODUCTS													Crops	Production			Reference2	Coefficients of Nutrients																										Nutrients
Crop	Reference1	Feed Forage	Feed Grass	Feed Cereal and Co-products	Feed OilProtein and oil-coproduct	Industrial NoFood (Include Biofuel and Alcool)	Loss	Seeds							Human Food	PROD BRUT	PROD NET			nrj_kcal	eau_g	proteines_g	glucides (Carb)_g	sucres_g	amidon_g	fibres_g	FAT (lipide)_g	ags_g	agmi_g	agpi_g	retinol_mcg	beta_carotene_mcg	vitamine_e_mg	sodium_mg	magnesium_mg	phosphore_mg	potassium_mg	calcium_mg	manganese_mg	Iron_mg	cuivre_mg	zinc_mg	selenium_mcg	iode_mcg	folate	nrj_kcal	eau_g	proteines_g	glucides (Carb)_g
Alfalfa		1													0	3.23918e+06	0
Aroma	EFESE					1									0	7306.54	0
Aromatic	EFESE					1									0	14326.5	0
Artichoke	FAOSTAT	0.0005					0.199								0.8005	16305.1	13052.2	1.30522e+10		35.775	87.975	2.1075	3.8575	1.07	0.24	4.825	0.2275	0.0275	0.00875	0.071	0	58.925	0.3275	183.375	31.15	53.3	293	40.025	0.15	0.6675	0.11275	0.3	6.3075	5.75	59.45	4.66943e+09	1.14827e+10	2.75076e+08	5.0349e+08
Avocado	FAOSTAT						0.267								0.733	394.562	289.214	2.89214e+08		552.5	35.15	0.78	0.415	0.2	0.09	1.8	60.3	11.205	38.75	6.665	0	13.75	23.765	3	10.5	19	215	4.7	0.1	0.17	0.09	0.215	8.75	7.7	35.2	1.59791e+09	1.01659e+08	2.25587e+06	1.20024e+06
Barley	EFESE			0.869		0.054	0.021	0.052							0.004	1.19967e+07	47986.7	4.79867e+10		118	68.8	2.26	24.4	0.28	24.1	3.8	0.44	0.093	0.057	0.21	0	5	0.01	3	22	54	93	11	0.26	1.33	0.11	0.82	10	0.5	16	5.66243e+10	3.30148e+10	1.0845e+09	1.17087e+10
Buckwheat	FAOSTAT			0.87			0.0513	0.023							0.0557	274011	15262.4	1.52624e+10		195.222	52.5111	5.66	36.0222	0.771111	32.7222	2.95333	2.5	0.662111	0.760667	0.683333	1.16667	25.5	1.20222	121.756	36.3889	101.867	116.444	21	0.517778	0.867778	0.157778	0.808889	10.2956	8.02667	30.3889	2.97956e+10	8.01446e+09	8.63852e+08	5.49786e+09
Butternot	FAOSTAT						0.267								0.733	109224	80061.4	8.00614e+10		98.075	80.8662	4.835	3.99875	2.12	0.55	2.01875	6.5325	1.2865	2.06281	2.74063	0	1620	0.61125	37.1875	85.2687	183.688	329.25	23.875	0.674875	1.41875	0.225	1.17125	6.01875	4.66125	30.2225	7.85203e+10	6.47427e+10	3.87097e+09	3.20146e+09
Cabbage	FAOSTAT	0.0005					0.199								0.8005	256179	205071	2.05071e+11		33.5846	90.1154	2.09231	3.14385	2.23462	0.264615	2.97154	0.738462	0.185231	0.254538	0.165462	0.807692	570.423	0.357692	72.3692	13.8231	40.2231	258.538	47.1769	0.153846	0.558462	0.0587692	0.207692	6.63308	6.4	43.8808	6.88723e+10	1.848e+11	4.29071e+09	6.44711e+09
Carob	EFESE					1									0	6.94572	0	0
Carrot	FAOSTAT	0.0005					0.199								0.8005	589215	471667	4.71667e+11		31.5286	90.5571	0.674286	5.40857	4.67714	0.3	2.22571	0.178571	0.0271429	0.0132143	0.0487143	1.5	5416.07	0.605714	66.7857	8.63571	24.8714	213.714	27.3714	0.148714	0.337143	0.0605714	0.182286	6.17143	6.35714	20.3714	1.4871e+11	4.27128e+11	3.18038e+09	2.55104e+10
Celery	FAOSTAT	0.0005					0.199								0.8005	38534.7	30847	3.0847e+10		20	89.8	1	3.95	2.63	0.215	2.735	0.225	0.0385	0.005	0.125	0	547	0.62	10.15	13.725	30.15	179.5	38.15	0.2075	0.92	0.1035	0.155	2.78	3.05	47.1	6.1694e+09	2.77006e+10	3.0847e+08	1.21846e+09
CerealMix	FAOSTAT			0.87			0.052	0.023							0.055	678670	37326.8	3.73268e+10		195.222	52.5111	5.66	36.0222	0.771111	32.7222	2.95333	2.5	0.662111	0.760667	0.683333	1.16667	25.5	1.20222	121.756	36.3889	101.867	116.444	21	0.517778	0.867778	0.157778	0.808889	10.2956	8.02667	30.3889	7.28703e+10	1.96007e+10	2.1127e+09	1.3446e+10
Cherry	FAOSTAT						0.267								0.733	5162.25	3783.93	3.78393e+09		82.06	80.09	0.71	18.79	17.42		1.4	0.14	0.026	0.031	0.035	0	88	0.21	1	8	14	121	10	0.06	0.34	0.07	0.07	0	10	4	3.10509e+09	3.03055e+09	2.68659e+07	7.11001e+08
Chestnut	FAOSTAT						0.054								0.946	10015.6	9474.75	9.47475e+09		166.333	57.1333	2.37667	33.2333	4.9	24.0667	4.53333	1.66	0.356667	0.63	0.59	0	10.82	0.516667	27.0333	37.0333	85.6667	555.333	32.0333	1.32667	1.04667	0.693333	1.25667	7.4	0.906667	55.3333	1.57597e+10	5.41324e+09	2.25183e+08	3.14877e+09
ChickPea	TERRES INOVIA				0.792		0.049	0.042							0.166	21125.4	3506.81	3.50681e+09		122	72.1	6.74	15	0.5	11.4	5.45	2.68	0.3	0.47	0.92	0	11.5	0.29	216	27.5	82.5	135	41.2	0.67	1.15	0.21	0.93	23.3	5	36.5	4.27831e+09	2.52841e+09	2.36359e+08	5.26021e+08
Citrus	FAOSTAT						0.267								0.733	65113.7	47728.3	4.77283e+10		44.26	88.64	0.596	9.084	8.798	0.036	0.722	0.154	0.0242	0.01756	0.02036	0	15.46	0.17	3.564	11.012	19.22	156.36	18.37	0.021	0.1874	0.0266	0.077	4.83	2.64	25.34	2.11246e+10	4.23064e+10	2.84461e+08	4.33564e+09
Clover	EFESE	1													0	726882	0	0
Condiment	FAOSTAT														1	128373	128373	1.28373e+11		250	10.9667	10	64	1.46	9.9	25.7333	3.3	1.64	1.19667	1.26333	0	333	1.76333	13.0667	150.333	168	1001	396	10.7	13.67	1.08	1.10333	5.35	6.91667	16.2667	3.20933e+11	1.40783e+10	1.28373e+10	8.21589e+10
Cucumber	FAOSTAT	0.0005					0.199								0.8005	33850	27096.9	2.70969e+10		16.5667	95.3333	0.753333	1.85	1.35667	0.396667	0.966667	0.22	0.015	0.00466667	0.016	0	146.1	0.203333	232.1	15.1667	25.2333	139	33.4	0.085	0.173333	0.032	0.118333	8.33333	6.76667	10.3333	4.48905e+09	2.58324e+10	2.0413e+08	5.01293e+08
DurumWheat	FAOSTAT			0.176		0.063	0.01	0.02							0.731	1.49485e+06	1.09274e+06	1.09274e+12		195.222	52.5111	5.66	36.0222	0.771111	32.7222	2.95333	2.5	0.662111	0.760667	0.683333	1.16667	25.5	1.20222	121.756	36.3889	101.867	116.444	21	0.517778	0.867778	0.157778	0.808889	10.2956	8.02667	30.3889	2.13327e+12	5.73809e+11	6.1849e+10	3.93629e+11
Eggplant	FAOSTAT	0.0005					0.199								0.8005	3613.52	2892.62	2.89262e+09		26.95	90.75	1.225	3.28	2.9	0.09	3.5	0.21	0.043	0.043	0.098	0	18	0.29	4.225	13.5	21.1	179	14.4	0.18	0.285	0.0695	0.129	0.94	0.575	19.25	7.79562e+08	2.62506e+09	3.54346e+07	9.4878e+07
Endive	FAOSTAT	0.0005					0.199								0.8005	332588	266236	2.66236e+11		20.2	90	1.19	2.83	2.4	0.3	1	0.2	0.043	0.043	0.098	0.83	16.5	0.1	5	8.3	23	183	27	0.1	0.14	0.04	0.19	20	20	25.6	5.37798e+10	2.39613e+11	3.16821e+09	7.53449e+09
Fababean	FAOSTAT				0.792		0.049	0.042							0.166	433041	71884.8	7.18848e+10		82.9	77.9	8.06	9.35	0.4	7.6	3.1	0.8	0.16	0.08	0.49	0	206	0.28	10	37	160	200	37	0.31	1.5	0.31	1	10	10	65.3	5.95925e+10	5.59983e+10	5.79391e+09	6.72123e+09
Fennel	FAOSTAT	0.0005					0.199								0.8005	13132	10512.1	1.05121e+10		280.325	29.4875	12.0075	15.0175	4.6425	5.15	23.75	13.88	0.751	9.4475	1.6925	0	1213.5	2.7175	84.25	276.75	360.75	1317.75	726.75	3.0475	25.7425	0.7875	3.425	2.725	8.475	18	2.94681e+10	3.09977e+09	1.26224e+09	1.57866e+09
Flax	EFESE					1									0	72925.9	0	0
FodderBeet	EFESE	1													0	631725	0	0
FodderCabbage	EFESE	1													0	155759	0	0
FodderCarrot	EFESE	1													0	1597.58	0	0
FodderFaba	EFESE	1													0	15277.4	0	0
FodderLegumes	EFESE	1													0	1120.07	0	0
FodderLentil	EFESE	1													0	1293.58	0	0
FodderLupine	EFESE	1													0	2678.08	0	0
FodderPea	EFESE	1													0	32507.7	0	0
FodderRadish	EFESE	1													0	8.77138e+06	0	0
FodderRoots	EFESE	1													0	98785	0	0
FodderTurnip	EFESE	1													0	501.428	0	0
GardenPea	FAOSTAT	0.0005					0.199								0.8005	296828	237611	2.37611e+11		78.3	78.825	5.3625	9.145	3.21	3.13	5.2125	1.1175	0.51225	0.095	0.435	0	572.25	0.1775	88.75	19.875	70.775	147.375	27.95	0.2225	1.115	0.102	0.5075	5.67	7.725	37.725	1.86049e+11	1.87296e+11	1.27419e+10	2.17295e+10
Garlic	FAOSTAT	0.0005					0.199								0.8005	20792.1	16644.1	1.66441e+10		237	34.99	11.35	42.4	1.715	1.09	7.625	0.585	0.2	0.0535	0.195	0	2.8	0.53	22.75	44.75	283	865	45.75	0.605	2.485	0.35	1.885	7.2	12.5	33.15	3.94465e+10	5.82377e+09	1.8891e+09	7.05709e+09
Grassland	EFESE	1													0	6.15841e+06	0	0
GreenBean	FAOSTAT	0.0005					0.199								0.8005	409558	327851	3.27851e+11		28	90.8	1.75	3.39	2.5	0.18	3.2	0.15	0.005	0.005	0.005	0	407	0.1	2.5	26	38	260	51	0.19	0.54	0.07	0.22	10	10	37	9.17984e+10	2.97689e+11	5.7374e+09	1.11142e+10
Hazelnut	FAOSTAT						0.054								0.946	15141.2	14323.6	1.43236e+10		737.667	3.27333	9.6	4.12333	3.05333	0.38	7	74.3	5.86667	55.4	8.92	0	17.3	20.0667	6.66667	111	216.667	538.333	81	2.95	2.46	1.15	1.6	6.66667	4.16667	51.0667	1.0566e+11	4.68859e+08	1.37507e+09	5.9061e+08
Hemp	EFESE					1									0	126357	0	0
Hop	EFESE					1									0	1562.98	0	0
IndustrialTomato	EFESE						0.18								0.82	497841	408229	4.08229e+11		74.45	79.15	3.086	10.177	7.989	0.07625	3.178	1.697	0.2112	0.6658	0.5565	0	620.1	1.199	178.282	42.86	79.15	826.6	30.234	0.3119	1.641	0.2474	0.3697	4.041	2.995	32.95	3.03927e+11	3.23113e+11	1.2598e+10	4.15455e+10
LambLettuce	FAOSTAT	0.0005					0.199								0.8005	14199	11366.3	1.13663e+10		14.7	95.3	1.3	1.33	0.73	0	1.2	0.2	0.021	0.0067	0.085	0	3640	0.18	8.47	14.9	29.5	200	64.6	0.4	0.98	0.036	0.2	2.33	1.22	38	1.67085e+09	1.08321e+10	1.47762e+08	1.51172e+08
Lavanda	EFESE					1									0	128476	0	0
Leek	FAOSTAT	0.0005					0.199								0.8005	112635	90164.1	9.01641e+10		28.25	89.8	1.295	3.95	2.63	0.215	2.735	0.225	0.0385	0.005	0.125	0	547	0.62	10.15	13.725	30.15	179.5	38.15	0.2075	0.92	0.1035	0.155	2.78	3.05	47.1	2.54714e+10	8.09674e+10	1.16763e+09	3.56148e+09
Lentil	FAOSTAT				0.792		0.049	0.042							0.166	48472.3	8046.4	8.0464e+09		104.764	69.3	8.44	13.4	0.34	12.45	6.1	0.57	0.1	0.14	0.27	0	18.75	0.15	116	20.4	96.35	184	21	0.395	1.935	0.205	0.925	3.9	3	17	8.42973e+09	5.57615e+09	6.79116e+08	1.07822e+09
Lettuce	FAOSTAT	0.0005					0.199								0.8005	89477.5	71626.8	7.16268e+10		14.7	95.3	1.3	1.33	0.73	0	1.2	0.2	0.021	0.0067	0.085	0	3640	0.18	8.47	14.9	29.5	200	64.6	0.4	0.98	0.036	0.2	2.33	1.22	38	1.05291e+10	6.82603e+10	9.31148e+08	9.52636e+08
Linen	EFESE			1											0	680386	0	0
Lupine	FAOSTAT				0.792		0.049	0.042							0.166	11717.5	1945.11	1.94511e+09		371	10.4	36.2	40.4	0	0	18.9	9.74	1.2	3.94	2.44	0	0	0.2	15	198	440	1010	176	2.38	4.36	1.02	4.75	0	0	355	7.21635e+09	2.02291e+08	7.04129e+08	7.85823e+08
Maize	EFESE	1													0	1.18931e+07	0	0																											75
MaizeFodder	EFESE	1													0	1.33354e+07	0	0
MaizeConsumption	FAOSTAT			0.739		0.171	0.017	0.013							0.06	1.56009e+07	936054	9.36054e+11		106	75.4	2.82	18.4	5.16	13.1	3.1	1.68	0.26	0.27	0.47	0	22	0.29	236	26.9	53.8	224	3.51	0.11	0.35	0.036	0.39	5	0.5	75	9.92217e+11	7.05785e+11	2.63967e+10	1.72234e+11
Melon	FAOSTAT	0.0005					0.199								0.8005	263090	210604	2.10604e+11		45.25	88.05	0.855	9.55	7.45	0.09	1.025	0.21	0.0245	0.01	0.0335	0	1265	0.0375	24.05	12.54	16.4	308.5	8.5	0.037	0.275	0.0465	0.133	5	5	37.95	9.52983e+10	1.85437e+11	1.80066e+09	2.01127e+10
Millet	EFESE			0.962			0.004	0.018							0.016	109266	1748.26	1.74826e+09		118	68.8	2.26	24.4	0.28	24.1	3.8	0.44	0.093	0.057	0.21	0	5	0.01	3	22	54	93	11	0.26	1.33	0.11	0.82	10	0.5	16	2.06294e+09	1.2028e+09	3.95106e+07	4.26574e+08
Mint	EFESE														1	7075.34	7075.34	7.07534e+09		57.6	82.1	3.52	5.3	5.3	0	7.4	0.84	0.22	0.029	0.45	0	740	5	30.5	71.5	66.5	514	221	1.15	8.48	0.28	1.1	0.5	3.9	105	4.07539e+09	5.80885e+09	2.49052e+08	3.74993e+08
NaturalGrassland	EFESE		1												0	3.07915e+07	0	0
Oat	FAOSTAT			0.63			0.005	0.04							0.325	395593	128568	1.28568e+11		363	9.54333	13.3667	55.6333	1.68	53.9667	12.5	6.89667	1.21667	2.23667	2.40333	0	0	1.03333	5.39333	162.333	478.667	422.667	65.6333	4.34333	4.42	0.35	3.01333	16.6433	0.966667	49.2	4.667e+11	1.22696e+10	1.71852e+10	7.15264e+10
OleoMix	FAOSTAT				0.128	0.357	0.142	0.014							0.359	1410.94	506.526	5.06526e+08		900	0	0	0	0	0	0	100	10	59.7	26.9	0	0	27.7	0.56	0.29	0	0.41	1.29	0.00075	0.023	0.0052	0.026	5	0	0	4.55873e+09	0	0	0
Olives	FAOSTAT						0.136								0.864	17523.3	15140.1	1.51401e+10		203.6	68.34	1.552	6	0.0122	0.072	6.55	20.44	2.626	13.42	2.346	0.0104	121.22	4.952	1529.2	21.78	19.784	93.98	79.3	0.1052	3.936	0.176	0.228	19.58	10.18	3.402	3.08252e+10	1.03467e+10	2.34974e+08	9.08406e+08
Onion	FAOSTAT						0.171								0.829	460934	382114	3.82114e+11		101.895	72.4083	2.70167	19.8517	8.75167	0.144	3.58333	0.666667	0.148667	0.179833	0.180167	1.83333	4.54833	0.12	51.92	22.2	77	438	60.0833	0.32	0.431667	0.1205	0.46	6.37167	6.90833	39.3583	3.89355e+11	2.76682e+11	1.03234e+10	7.5856e+10
OtherCereals	FAOSTAT			0.87			0.052	0.023							0.055	55198.9	3035.94	3.03594e+09		195.222	52.5111	5.66	36.0222	0.771111	32.7222	2.95333	2.5	0.662111	0.760667	0.683333	1.16667	25.5	1.20222	121.756	36.3889	101.867	116.444	21	0.517778	0.867778	0.157778	0.808889	10.2956	8.02667	30.3889	5.92683e+09	1.59421e+09	1.71834e+08	1.09361e+09
OtherFodder	EFESE	1													0	106370	0	0
OtherGrassland	EFESE		1												0	3.08572e+06	0	0
OtherOleoCROP	FAOSTAT				0.128	0.357	0.142	0.014							0.359	14184.1	5092.1	5.0921e+09		900	0	0	0	0	0	0	100	7.26	59.7	26.9	0	0	27.7	0.56	0.29	0	0.41	1.29	0.00075	0.023	0.0052	0.026	5	0	0	4.58289e+10	0	0	0
OtherPea	FAOSTAT				0.792		0.049	0.042							0.166	4147.87	688.547	6.88547e+08		78.3	78.825	5.3625	9.145	3.21	3.13	5.2125	1.1175	0.51225	0.095	0.435	0	572.25	0.1775	88.75	19.875	70.775	147.375	27.95	0.2225	1.115	0.102	0.5075	5.67	7.725	37.725	5.39132e+08	5.42747e+08	3.69233e+07	6.29676e+07
Parsnip	FAOSTAT	0.0005					0.199								0.8005	18725.3	14989.6	1.49896e+10		67.8	80.2	1.32	13.4	4.8	0.18	3.6	0.3	0.05	0.11	0.047	0	0	1	10	29	69	367	37	0.29	0.58	0.14	0.26	10	10	67	1.0163e+10	1.20217e+10	1.97863e+08	2.00861e+09
Pea	FAOSTAT				0.452		0.032	0.075							0.473	544367	257485	2.57485e+11		78.3	78.825	5.3625	9.145	3.21	3.13	5.2125	1.1175	0.51225	0.095	0.435	0	572.25	0.1775	88.75	19.875	70.775	147.375	27.95	0.2225	1.115	0.102	0.5075	5.67	7.725	37.725	2.01611e+11	2.02963e+11	1.38077e+10	2.3547e+10
PeachTree	FAOSTAT						0.267								0.733	3081.34	2258.62	2258620021		117.875	67.125	1.65	25.07	19.35	0.175	4.4325	0.3875	0.026	0.0845	0.11025	0	68.85	0.36	22.0925	24.45	40.25	338.75	9.575	0.19475	1.8025	0.20475	0.2125	6.9075	7.0875	8.73	2.66235e+09	1.5161e+09	3.72672e+07	5.66236e+08
PeaMix	FAOSTAT				0.792		0.049	0.042							0.166	177401	29448.6	2.94486e+10		78.3	78.825	5.3625	9.145	3.21	3.13	5.2125	1.1175	0.51225	0.095	0.435	0	572.25	0.1775	88.75	19.875	70.775	147.375	27.95	0.2225	1.115	0.102	0.5075	5.67	7.725	37.725	2.30582e+10	2.32128e+10	1.57918e+09	2.69307e+09
Peanut	FAOSTAT				0.12		0.014	0.014							0.852	106.363	90.6212	9.06212e+07		619.667	1.41667	23.0667	13.7667	3.66	8.82	8.25	50.6333	8.40333	25.2	11.5233	0	0	3.31	356.667	172	283.667	565.333	50.9333	1.39	1.32667	0.596667	2.87	6.53333	4.63333	76.7333	5.6155e+08	1.2838e+06	2.09033e+07	1.24755e+07
Pear	FAOSTAT						0.267								0.733	15198.5	11140.5	1.11405e+10		56.9333	84.2	0.326667	12.0333	10.27	0	1.94	0.137667	0.0237667	0.0213333	0.049	0	17.3333	0.25	2.03333	6.07667	10.4667	98.3333	7.48667	0.02	0.177333	0.066	0.089	2.36667	0.7	4.83333	6.34268e+09	9.38033e+09	3.63924e+07	1.34058e+09
Pepper	FAOSTAT	0.0005					0.199								0.8005	4775.57	3822.84	3.82284e+09		307.667	10.9667	12.2667	42.1667	1.46	9.9	25.7333	4.29	1.64	1.19667	1.26333	0	333	1.76333	13.0667	150.333	168	1001	396	10.7	13.67	1.08	1.10333	5.35	6.91667	16.2667	1.17616e+10	4.19238e+08	4.68935e+08	1.61197e+09
Pistachio	FAOSTAT						0.054								0.946	243.013	229.89	2.2989e+08		595	2.43	18.4	18.6	7.74	1.38	10.1	47.4	5.52	23.8	13.5	0	156	2.42	6	115	478	1020	108	1.24	4.1	1.3	2.3	4.7	2.5	50.8	1.36785e+09	5.58634e+06	4.22998e+07	4.27596e+07
Plum	FAOSTAT						0.267								0.733	48559.3	35594	3.5594e+10		66.8333	82.7667	0.656667	15.0067	11.2733	0.06	1.21667	0.193	0.0153333	0.034	0.0373333	0	207.333	0.55	5.16667	9.83333	20.9333	225	10.7633	0.102	0.5	0.076	0.142	4.38667	3.8	11.6667	2.37886e+10	2.946e+10	2.33734e+08	5.34147e+09
PoliphytedGrassland	EFESE		1												0	2.17113e+06	0	0
PoorPastures	EFESE		1												0	425164	0	0
PotatoConsumption	FAOSTAT			0.112		0.005	0.145	0.055							0.683	7.34875e+06	5.0192e+06	5.0192e+12		151.408	64.1167	2.28917	26.5917	1.08833	21.95	2.34917	3.445	0.751667	1.61349	0.897	3.86667	5.72333	0.890833	93.5067	21.5417	57.6	465.375	16.4275	0.135833	0.605833	0.105333	0.296667	6.09833	6.10917	27.6892	7.59948e+12	3.21814e+12	1.14898e+11	1.33469e+12
PotatoStarch	EFESE			0.045		0.164	0.219	0.059							0.677	853630	577908	5.77908e+11		151.408	64.1167	2.28917	26.5917	1.08833	21.95	2.34917	3.445	0.751667	1.61349	0.897	3.86667	5.72333	0.890833	93.5067	21.5417	57.6	465.375	16.4275	0.135833	0.605833	0.105333	0.296667	6.09833	6.10917	27.6892	8.75001e+11	3.70535e+11	1.32293e+10	1.53675e+11
Pumpkin	FAOSTAT	0.0005					0.199								0.8005	64337.8	51502.4	5.15024e+10		98.075	80.8662	4.835	3.99875	2.12	0.55	2.01875	6.5325	1.2865	2.06281	2.74063	0	1620	0.61125	37.1875	85.2687	183.688	329.25	23.875	0.674875	1.41875	0.225	1.17125	6.01875	4.66125	30.2225	5.0511e+10	4.1648e+10	2.49014e+09	2.05945e+09
Radish	FAOSTAT	0.0005					0.199								0.8005	13194.7	10562.4	1.05624e+10		16	90.5571	0.674286	5.40857	4.67714	0.3	2.22571	0.178571	0.0271429	0.0132143	0.0487143	1.5	4	0.605714	66.7857	8.63571	24.8714	213.714	27.3714	0.148714	0.337143	0.0605714	0.28	6.17143	6.35714	20.3714	1.68998e+09	9.565e+09	7.12207e+07	5.71275e+08
Rapeseed	EFESE					1									0	5.11218e+06	0	0
Raygrass	EFESE	1													0	2.34728e+06	0	0
RedBerry	FAOSTAT						0.267								0.733	25086.3	18388.3	1.83883e+10		49.25	86.35	1.175	6.13	5.715	0.175	5.175	0.8	0.096	0.1105	0.475	0	68.5	1.14	2.335	18.5	33.5	199	22.95	0.82	0.59	0.075	0.29	5.095	5.2	41.05	9.05623e+09	1.58783e+10	2.16062e+08	1.1272e+09
Rice	FAOSTAT					0.25	0.015	0.031							0.75	66887.5	50165.7	5.01657e+10		201.85	49.4833	4.29333	43.2167	0.376667	36.6	1.59167	0.953333	0.1645	0.298167	0.381167	0	6.41667	0.516667	16.6833	64.25	175.833	140.867	13.8667	1.08667	1.10167	0.176667	1.24167	10.4667	8.33333	38.195	1.01259e+11	2.48236e+10	2.15378e+09	2.16799e+10
Rocket	FAOSTAT	0.0005					0.199								0.8005	9228.38	7387.32	7.38732e+09		27.8	91.7	2.58	2.1	2.05	0.021	1.6	0.66	0.086	0.049	0.32	0	1420	0.43	27	47	52	369	160	0.32	1.46	0.076	0.47	2.33	1.45	164	2.05367e+09	6.77417e+09	1.90593e+08	1.55134e+08
Rye	FAOSTAT			0.588			0.012	0.032							0.368	401328	147689	1.47689e+11		147	61.9	5.54	27.4	0	25	3.8	0.9	0.23	0.25	0.33	0	2.5	0.04	2.5	28	96	99	21	0.8	0.78	0.17	0.71	10	10	110	2.17102e+11	9.14193e+10	8.18196e+09	4.04667e+10
Salsify	FAOSTAT	0.0005					0.199								0.8005	21354.4	17094.2	1.70942e+10		28	91.5	1.25	4.25	1	2.5	2.5	0.15	0.07	0.011	0.056	0	19	0.43	235	8.9	33	173	21	0.15	0.45	0.079	0.22	0.6	0.2	26	4.78638e+09	1.56412e+10	2.13678e+08	7.26504e+08
SoftWheat	FranceAgriMer			0.41		0.16	0.019	0.04							0.371	3.52231e+07	1.30678e+07	1.30678e+13		195.222	52.5111	5.66	36.0222	0.771111	32.7222	2.95333	2.5	0.662111	0.760667	0.683333	1.16667	25.5	1.20222	121.756	36.3889	101.867	116.444	21	0.517778	0.867778	0.157778	0.808889	10.2956	8.02667	30.3889	2.55112e+13	6.86204e+12	7.39636e+11	4.70731e+12
Soja	EFESE				0.8	0.2									0	392184	0
Sorghum	EFESE			0.982			0.007	0.011							0	276635	0
Sorrel	FAOSTAT	0.0005					0.199								0.8005	559.531	447.905	4.47905e+08		23.2	93	1.84	1.6	1.54	0.055	1.8	0.65	0.1	0.04	0.26	0	299	0.16	4	103	63	390	44	0.35	2.4	0.13	0.2	0.9	0.4	116.54	1.03914e+08	4.16552e+08	8.24145e+06	7.16648e+06
Spelt	FAOSTAT			0.176		0.06	0.01	0.02							0.734	175352	128708	1.28708e+11		195.222	52.5111	5.66	36.0222	0.771111	32.7222	2.95333	2.5	0.662111	0.760667	0.683333	1.16667	25.5	1.20222	121.756	36.3889	101.867	116.444	21	0.517778	0.867778	0.157778	0.808889	10.2956	8.02667	45	2.51267e+11	6.7586e+10	7.28488e+09	4.63635e+10
Spinach	FAOSTAT	0.0005					0.199								0.8005	38867.2	31113.2	3.11132e+10		34.72	90.04	3.304	1.864	0.486	0.494	2.834	0.954	0.327	0.0528	0.42	0	5127.8	2.334	157.34	50.54	40.44	306	132.64	0.716	1.924	0.1318	0.556	6.29	7.238	116.54	1.08025e+10	2.80143e+10	1.02798e+09	5.79949e+08
Strawberry	FAOSTAT						0.267								0.733	37826.1	27726.5	2.77265e+10		38.6	90.3	0.63	6.03	5.6	0.18	3.8	0.25	0.005	0.005	0.005	0	2.5	0.3	2.5	12	23	140	18	0.26	0.19	0.02	0.11	10	10	98.9	1.07024e+10	2.50371e+10	1.74677e+08	1.67191e+09
SugarBeet to Sugar	FAOSTAT														0.21	1.87347e+07	3.93429e+06	3.93429e+12		395.25	0.5275	0.2575	98.7	97.8	0	0.0925	0.0825	0.01325	0.00125	0.00125	0	0	0	12.3325	10.7375	2	78.2	44.4225	0.049575	0.56675	0.021125	0.05225	2	0.275	0.25	1.55503e+13	2.07534e+10	1.01308e+10	3.88315e+12
Sunchoke	FAOSTAT	0.0005					0.199								0.8005	8314.79	6655.99	6.65599e+09		35.775	87.975	2.1075	3.8575	1.07	0.24	4.825	0.2275	0.0275	0.00875	0.071	0	58.925	0.3275	183.375	31.15	53.3	293	40.025	0.15	0.6675	0.11275	0.3	6.3075	5.75	59.45	2.38118e+09	5.85561e+09	1.40275e+08	2.56755e+08
Sunflower	EFESE					1									0	1.85719e+06	0
Swede	FAOSTAT	0.0005					0.199								0.8005	1457.94	1167.08	1.16708e+09		26	91.5	0.93	4.26	3.95	0.31	1.8	0.18	0.029	0.027	0.095	0	1	0.24	5	10	41	216	18	0.097	0.18	0.029	0.12	10	10	37	3.03441e+08	1.06788e+09	1.08538e+07	4.97176e+07
SweetCorn	FAOSTAT	0.0005					0.199								0.8005	440699	352779	3.52779e+11		106	75.4	2.82	18.4	5.16	13.1	3.1	1.68	0.26	0.27	0.47	0	22	0.29	236	26.9	53.8	224	3.51	0.11	0.35	0.036	0.39	5	0.5	75	3.73946e+11	2.65995e+11	9.94837e+09	6.49114e+10
TemperateFruits	FAOSTAT						0.267								0.733	863103	632654	6.32654e+11		78.507	79.211	0.286	17.423	15.629	0.162	2.156	0.1868	0.03283	0.01144	0.0663	0	11.913	0.207	11.997	5.565	11.76	147.9	6.884	0.0774	0.2754	0.0433	0.0586	4.0795	2.49629	3.325	4.96678e+11	5.01132e+11	1.80939e+09	1.10227e+11
TemporaryGrassland	EFESE														0	8.43592e+06	0
Tobacco	EFESE					1									0	3262.23	0
Tomato	FAOSTAT						0.18								0.82	18742	15368.4	1.53684e+10		74.45	79.15	3.086	10.177	7.989	0.07625	3.178	1.697	0.2112	0.6658	0.5565	0	620.1	1.199	178.282	42.86	79.15	826.6	30.234	0.3119	1.641	0.2474	0.3697	4.041	2.995	32.95	1.14418e+10	1.21641e+10	4.74269e+08	1.56404e+09
Triticale	EFESE			0.969			0.004	0.027							0	1.67007e+06	0
Truffle	FAOSTAT	0.0005					0.199								0.8005	0	0	0		30.29	89.8	2.57	3.085	1.2944	0.102	2.398	0.431	0.1287	0.03396	0.1763	0	93.85	0.037	74.25	12.27	89.85	311.31	14.213	0.1752	1.187	0.3663	0.821	4.139	4.36	22.99	0	0	0	0
Turnip	FAOSTAT	0.0005					0.199								0.8005	14718.4	11782.1	1.17821e+10		31.5286	90.5571	0.674286	5.40857	4.67714	0.3	2.22571	0.178571	0.0271429	0.0132143	0.0487143	1.5	5416.07	0.605714	66.7857	8.63571	24.8714	213.714	27.3714	0.148714	0.337143	0.0605714	0.182286	6.17143	6.35714	20.3714	3.71473e+09	1.06695e+10	7.9445e+07	6.37243e+08
Walnut	FAOSTAT						0.054								0.946	57953	54823.5	5.48235e+10		659.333	15.3	8.1	5.60667	1.43333	0.12	3.53333	66.3667	6.46	11.6667	45.5	0	24.2347	1.69333	1.66667	86.6667	206.667	273.333	56.3333	1.86667	1.23333	0.676667	1.63333	7.5	6.66667	76	3.6147e+11	8.388e+09	4.44071e+09	3.07377e+09
Watermelon	FAOSTAT	0.0005					0.199								0.8005	7425.94	5944.47	5.94447e+09		38.9	91	0.69	8.33	7.9	0.18	0.5	0.25	0.005	0.005	0.005	0	1220	0.04	2.5	11	9.7	100	6	0.02	0.16	0.03	0.09	10	10	36.9	2.3124e+09	5.40947e+09	4.10168e+07	4.95174e+08
Zucchini	FAOSTAT	0.0005					0.199								0.8005	48427.6	38766.3	3.87663e+10		16.5	94.7	1.23	1.8	1.79	0	1.05	0.26	0.061	0.013	0.084	0	120	0.12	9	17.5	44.7	262	18.7	0.18	0.36	0.052	0.31	0.58	1.64	24	6.39644e+09	3.67117e+10	4.76826e+08	6.97794e+08
							Animals in growing stages not for production	Animals only for reproduction not for production	Coefficients for animal products							Animal Production
Animals	Product	Reference1							Milk LITRE/INDIVIDUS/YEAR	Eggs number/individus/year	Production Animals / Livestock (France's mean)	Target weight	% OF NET Meat wheight	% OF NET Offals and products		Number (for fish is kg)	Production		Reference2
AdultFemalePigs
AdultMalePigs	Meat	Agrest + FranceAgriMer									3	115	0.59			10896	2.21788e+06	2217880800		275.312	54.2406	20.5827	0.9375	0.544219	0.100492	0.229297	20.9484	8.07781	9.00609	2.42297	85.8036	14.9141	0.367344	870.609	20.0441	182.68	328.156	15.7597	0.0484453	1.78906	0.106641	2.02922	11.4303	10.3317	13.1722	6.1061e+09	1.20299e+09	4.56499e+08	2.07926e+07
Growing pigs	Meat	Agrest + FranceAgriMer									3	115	0.59			6862358	1.39683e+09	1.39683e+12		275.312	54.2406	20.5827	0.9375	0.544219	0.100492	0.229297	20.9484	8.07781	9.00609	2.42297	85.8036	14.9141	0.367344	870.609	20.0441	182.68	328.156	15.7597	0.0484453	1.78906	0.106641	2.02922	11.4303	10.3317	13.1722	3.84566e+12	7.57651e+11	2.87505e+11	1.30953e+10
Piglets																		0
DairyCows	Milk	IDELE							8878							3230474	28680148172	28680148172000	USDA	62	88	3.32	4.66	3.79	0	0	3.32	2.1	1.01	0.13	29	98	0.06	41	10	90	147	117	0.00799	0.03	0.02	0.4	3.7	21	5	17781691866640	25238530391360	9.52181e+11	1.33649e+12
Cow	Meat	Agrest + FranceAgriMer									0.42	700	0.37			3733154	4.06092e+08	406092492120		188.568	62.025	26.1227	0.835495	0.209182	0.1396	0.0461136	8.97045	3.61	3.55091	0.612045	41.7727	19.0614	0.474091	404.434	23.875	191.841	329.25	16.4243	0.0261136	2.13409	0.0943182	5.43	9.59795	6.55	10.8582	7.65761e+11	2.51879e+11	1.06082e+11	3.39288e+09
	Offals	Agrest + FranceAgriMer									0.42	700		0.06		3733154	6.58528e+07	6.58528e+10		173.167	65.8083	24.1583	0.943333	0.208333	0.108333	0.0833333	8.06833	2.89167	2.68917	0.866667	1543.04	25.1667	0.425833	162.292	19.0033	276.667	275.833	11.5367	0.103917	3.61667	2.15442	3.2725	9.2575	6.20833	114.333	1.14035e+11	4.33367e+10	1.59089e+10	6.21212e+08
Calves	Meat	Agrest + FranceAgriMer									0.22	250	0.41			4869125	1.09799e+08	109798768750		188.568	62.025	26.1227	0.835495	0.209182	0.1396	0.0461136	8.97045	3.61	3.55091	0.612045	41.7727	19.0614	0.474091	404.434	23.875	191.841	329.25	16.4243	0.0261136	2.13409	0.0943182	5.43	9.59795	6.55	10.8582	2.07046e+11	6.81027e+10	2.86824e+10	9.17364e+08
	Offals	Agrest + FranceAgriMer									0.22	250		0.08		4869125	21424150	21424150000		173.167	65.8083	24.1583	0.943333	0.208333	0.108333	0.0833333	8.06833	2.89167	2.68917	0.866667	1543.04	25.1667	0.425833	162.292	19.0033	276.667	275.833	11.5367	0.103917	3.61667	2.15442	3.2725	9.2575	6.20833	114.333	3.70995e+10	1.40989e+10	5.17572e+09	2.02101e+08
Males1	Meat	Agrest + FranceAgriMer									0.95	1000	0.37			714035	2.50983e+08	250983302500		188.568	62.025	26.1227	0.835495	0.209182	0.1396	0.0461136	8.97045	3.61	3.55091	0.612045	41.7727	19.0614	0.474091	404.434	23.875	191.841	329.25	16.4243	0.0261136	2.13409	0.0943182	5.43	9.59795	6.55	10.8582	4.73275e+11	1.55672e+11	6.55637e+10	2.09695e+09
	Offals	Agrest + FranceAgriMer									0.95	1000		0.06		714035	40699995	40699995000		173.167	65.8083	24.1583	0.943333	0.208333	0.108333	0.0833333	8.06833	2.89167	2.68917	0.866667	1543.04	25.1667	0.425833	162.292	19.0033	276.667	275.833	11.5367	0.103917	3.61667	2.15442	3.2725	9.2575	6.20833	114.333	7.04788e+10	2.6784e+10	9.83244e+09	3.83937e+08
Males2	Meat	Agrest + FranceAgriMer									0.95	1000	0.37			336978	118447767	118447767000		188.568	62.025	26.1227	0.835495	0.209182	0.1396	0.0461136	8.97045	3.61	3.55091	0.612045	41.7727	19.0614	0.474091	404.434	23.875	191.841	329.25	16.4243	0.0261136	2.13409	0.0943182	5.43	9.59795	6.55	10.8582	2.23355e+11	7.34672e+10	3.09418e+10	9.89626e+08
	Offals	Agrest + FranceAgriMer									0.95	1000		0.06		336978	19207746	19207746000		173.167	65.8083	24.1583	0.943333	0.208333	0.108333	0.0833333	8.06833	2.89167	2.68917	0.866667	1543.04	25.1667	0.425833	162.292	19.0033	276.667	275.833	11.5367	0.103917	3.61667	2.15442	3.2725	9.2575	6.20833	114.333	3.32614e+10	1.26403e+10	4.64027e+09	1.81193e+08
Heifers1	Meat	Agrest + FranceAgriMer									0.16	400	0.41			477474	1.25289e+07	12528917760		188.568	62.025	26.1227	0.835495	0.209182	0.1396	0.0461136	8.97045	3.61	3.55091	0.612045	41.7727	19.0614	0.474091	404.434	23.875	191.841	329.25	16.4243	0.0261136	2.13409	0.0943182	5.43	9.59795	6.55	10.8582	2.36256e+10	7.77106e+09	3.2729e+09	1.04679e+08
	Offals	Agrest + FranceAgriMer									0.16	400		0.08		477474	2.44467e+06	2444666880		173.167	65.8083	24.1583	0.943333	0.208333	0.108333	0.0833333	8.06833	2.89167	2.68917	0.866667	1543.04	25.1667	0.425833	162.292	19.0033	276.667	275.833	11.5367	0.103917	3.61667	2.15442	3.2725	9.2575	6.20833	114.333	4.23335e+09	1.60879e+09	5.90591e+08	2.30614e+07
Heifers2	Meat	Agrest + FranceAgriMer									0.16	400	0.41			428162	1.1235e+07	1.1235e+10		188.568	62.025	26.1227	0.835495	0.209182	0.1396	0.0461136	8.97045	3.61	3.55091	0.612045	41.7727	19.0614	0.474091	404.434	23.875	191.841	329.25	16.4243	0.0261136	2.13409	0.0943182	5.43	9.59795	6.55	10.8582	2.11856e+10	6.96849e+09	2.93488e+09	9.38677e+07
	Offals	Agrest + FranceAgriMer									0.16	400		0.08		428162	2.19219e+06	2192189440		173.167	65.8083	24.1583	0.943333	0.208333	0.108333	0.0833333	8.06833	2.89167	2.68917	0.866667	1543.04	25.1667	0.425833	162.292	19.0033	276.667	275.833	11.5367	0.103917	3.61667	2.15442	3.2725	9.2575	6.20833	114.333	3.79614e+09	1.44264e+09	5.29596e+08	2.06797e+07
ReHeifers1	Meat	Agrest + FranceAgriMer									0.16	600	0.41			1777581	6.99656e+07	69965588160		188.568	62.025	26.1227	0.835495	0.209182	0.1396	0.0461136	8.97045	3.61	3.55091	0.612045	41.7727	19.0614	0.474091	404.434	23.875	191.841	329.25	16.4243	0.0261136	2.13409	0.0943182	5.43	9.59795	6.55	10.8582	1.31933e+11	4.33962e+10	1.82769e+10	5.84559e+08
	Offals	Agrest + FranceAgriMer									0.16	600		0.08		1777581	1.36518e+07	13651822080		173.167	65.8083	24.1583	0.943333	0.208333	0.108333	0.0833333	8.06833	2.89167	2.68917	0.866667	1543.04	25.1667	0.425833	162.292	19.0033	276.667	275.833	11.5367	0.103917	3.61667	2.15442	3.2725	9.2575	6.20833	114.333	2.36404e+10	8.98404e+09	3.29805e+09	1.28782e+08
ReHeifers2	Meat	Agrest + FranceAgriMer									0.16	600	0.41			1283186	5.05062e+07	5.05062e+10		188.568	62.025	26.1227	0.835495	0.209182	0.1396	0.0461136	8.97045	3.61	3.55091	0.612045	41.7727	19.0614	0.474091	404.434	23.875	191.841	329.25	16.4243	0.0261136	2.13409	0.0943182	5.43	9.59795	6.55	10.8582	9.52386e+10	3.13265e+10	1.31936e+10	4.21977e+08
	Offals	Agrest + FranceAgriMer									0.16	600		0.08		1283186	9.85487e+06	9854868480		173.167	65.8083	24.1583	0.943333	0.208333	0.108333	0.0833333	8.06833	2.89167	2.68917	0.866667	1543.04	25.1667	0.425833	162.292	19.0033	276.667	275.833	11.5367	0.103917	3.61667	2.15442	3.2725	9.2575	6.20833	114.333	1.70653e+10	6.48532e+09	2.38077e+09	9.29643e+07
DairySheep	Milk	IDELE							298							1172404	349376392	349376392000	USDA	103	82.2	5.68	4.5	4.5	0	0	6.97	4.8	1.6	0.3	20.3	0	0.15	44	17.1	158	103	199	0.018	0.46	0.011	0.54	3	23.3	9.19	359857683760	287187394224	1.98446e+10	15721937640
DairyGoats	Milk	IDELE							1002							891882	893665764	893665764000	USDA	46.1	89.6	3.77	4.13	4.13	0	0	1.57	1.06	0.32	0.04	13.4	0	0.04	58.6	13	110	190	110	0.0053	0.02	0	0.33	2	15.3	1	411979917204	800724524544	3.36912e+10	3.69084e+10
Goats0	Meat	Agrest + FranceAgriMer									1.59	20	0.4			305318	3.88364e+06	3883644960		200.182	61.5545	28.2455	0.00554545	0	0	0	9.69909	3.60818	3.52091	0.863636	2.04636	0	0.176364	68.0545	24.9182	196.636	306.727	15.1273	0.0202727	1.40545	0.115455	4.59636	9.56909	5.4	15.4545	7.77435e+09	2.39056e+09	1.09695e+09	215366
	Offals	Agrest + FranceAgriMer									1.59	20		0.1		305318	970911	970911240		143	70.4	19.7667	1.32	0	0	0	6.54	1.88	1.2	0.783333	2589	0	0.39	125	18.8333	350.333	223.333	12.8333	0.253	6.06	3.01	3.28667	1.1	5.33333	181	1.3884e+09	6.83522e+08	1.91917e+08	1.2816e+07
MaleGoats	Meat	Agrest + FranceAgriMer									1.59	30	0.4			103165	1.96839e+06	1.96839e+09		200.182	61.5545	28.2455	0.00554545	0	0	0	9.69909	3.60818	3.52091	0.863636	2.04636	0	0.176364	68.0545	24.9182	196.636	306.727	15.1273	0.0202727	1.40545	0.115455	4.59636	9.56909	5.4	15.4545	3.94036e+09	1.21163e+09	5.5598e+08	109156
	Offals	Agrest + FranceAgriMer									1.59	30		0.1		103165	492097	4.92097e+08		143	70.4	19.7667	1.32	0	0	0	6.54	1.88	1.2	0.783333	2589	0	0.39	125	18.8333	350.333	223.333	12.8333	0.253	6.06	3.01	3.28667	1.1	5.33333	181	7.03699e+08	3.46436e+08	9.72712e+07	6.49568e+06
MaleSheep	Meat	Agrest + FranceAgriMer									0.44	36	0.4			1319571	8.3608e+06	8.3608e+09		200.182	61.5545	28.2455	0.00554545	0	0	0	9.69909	3.60818	3.52091	0.863636	2.04636	0	0.176364	68.0545	24.9182	196.636	306.727	15.1273	0.0202727	1.40545	0.115455	4.59636	9.56909	5.4	15.4545	1.67368e+10	5.14645e+09	2.36155e+09	463644
	Offals	Agrest + FranceAgriMer									0.44	36		0.1		1319571	2.0902e+06	2.0902e+09		143	70.4	19.7667	1.32	0	0	0	6.54	1.88	1.2	0.783333	2589	0	0.39	125	18.8333	350.333	223.333	12.8333	0.253	6.06	3.01	3.28667	1.1	5.33333	181	2.98899e+09	1.4715e+09	4.13163e+08	2.75906e+07
Sheep0	Meat	Agrest + FranceAgriMer									0.91	25	0.4			960264	8.7384e+06	8738402400		200.182	61.5545	28.2455	0.00554545	0	0	0	9.69909	3.60818	3.52091	0.863636	2.04636	0	0.176364	68.0545	24.9182	196.636	306.727	15.1273	0.0202727	1.40545	0.115455	4.59636	9.56909	5.4	15.4545	1.74927e+10	5.37888e+09	2.4682e+09	484584
	Offals	Agrest + FranceAgriMer									0.91	25		0.1		960264	2.1846e+06	2184600600		143	70.4	19.7667	1.32	0	0	0	6.54	1.88	1.2	0.783333	2589	0	0.39	125	18.8333	350.333	223.333	12.8333	0.253	6.06	3.01	3.28667	1.1	5.33333	181	3123978858	1.53796e+09	4.31823e+08	2.88367e+07
Sheep1	Meat	Agrest + FranceAgriMer									0.91	36	0.4			3095373	4.05618e+07	4.05618e+10		200.182	61.5545	28.2455	0.00554545	0	0	0	9.69909	3.60818	3.52091	0.863636	2.04636	0	0.176364	68.0545	24.9182	196.636	306.727	15.1273	0.0202727	1.40545	0.115455	4.59636	9.56909	5.4	15.4545	8.11973e+10	2.49676e+10	1.14569e+10	2.24933e+06
	Offals	Agrest + FranceAgriMer									0.91	36		0.1		3095373	1.01404e+07	1.01404e+10		143	70.4	19.7667	1.32	0	0	0	6.54	1.88	1.2	0.783333	2589	0	0.39	125	18.8333	350.333	223.333	12.8333	0.253	6.06	3.01	3.28667	1.1	5.33333	181	1.45008e+10	7.13887e+09	2.00443e+09	1.33854e+08
Broilers	Meat	IDELE										1.8	0.65			151037762	1.76714e+08	1.76714e+11	USDA	202	63.08	24.39	0.906	0.219	0.181	0.168	11.142	3.469	4.754	2.054	14.98	6.7	0.42	258.2	25.49	189.6	300.3	13.95	0.0712	0.891	0.1034	1.717	13.266	10.4	8.092	3.56963e+11	1.11471e+11	4.31006e+10	1.60103e+09
Chicks
LayersForEggs	Eggs	Agrest								290						53385333	15481746570	851496061350	USDA	75	35.775	6.65625	0.444375	0.273125	0	0	6.52688	1.925	2.71563	0.945625	96	14.1875	0.975	51.4625	4.62937	72.7938	61	25	0.0175	0.722938	0.0330625	0.494063	13.805	40.4125	33.9312	1161130992750	5.53859e+11	1.0305e+11	6.8797e+09
LayersForHatching
Fish 1 (peach and farming)	Meat	FranceAgriMer											0.4			488000000	195200000	195200000000		190.437	63.5988	9.76893	8.42919	3.60499	2.80773	2.89522	12.4094	4.99364	4.19459	2.24378	109.841	253.585	1.86875	586.064	40.8277	154.827	289.423	132.164	0.657374	2.2869	0.193884	1.17486	11.7997	31.8978		3.71733e+11	1.24145e+11	1.9069e+10	1.64538e+10
Fish 2 (Shellfish)	Meat	FranceAgriMer											0.2			142000000	28400000	28400000000		105.618	73.8295	19.02	2.99952	0.117619	0	0.00809524	1.9419	0.361333	0.387143	0.597524	43.5333	0	1.62143	398.129	51.6714	222.981	290.571	92.2476	0.396667	3.85095	0.683286	4.15286	38.6667	77.9571		2.99955e+10	2.09676e+10	5401680000	8.51865e+08
Fish 3 (Algae)	Meat	FranceAgriMer											1			500000	500000	500000000		51.61	82.2	3.51	7.94	0.58	0	0.7	0.49	0.146	0.06	0.125	0	1079	0.96	384	77	60	165	129	0.37	2.28	0.226	0.89	0.7	0		258050000	411000000	17550000	39700000
																		6.3868e+13
																																												Total production		8.43875e+13	4.45499e+13	2.92678e+12	1.28515e+13
																																														nrj_kcal	eau_g	proteines_g	glucides (Carb)_g
																																											68287487	POPULATION
																																												/CAPITA/YEAR		3376.42	1782.48	117.103	514.198
																																												Crop production		5.76673e+13	1.58495e+13	1.13007e+12	1.14129e+13
																																														nrj_kcal	eau_g	proteines_g	glucides (Carb)_g
																																										https://www.insee.fr/fr/statistiques/8290644?sommaire=8290669	68287487	POPULATION
																																												/CAPITA/YEAR		2307.32	634.151	45.2152	456.641
																																												Animal production		2.63183e+13	2.85549e+13	1.77221e+12	1.42119e+12
																																														nrj_kcal	eau_g	proteines_g	glucides (Carb)_g
																																											68287487	POPULATION
																																												/CAPITA/YEAR		1053.02	1142.5	70.9077	56.8631
[truncated: 594 more columns]

## Sheet: FdGp contribution in production
Food groups contribution (%) in nutrient production
	NB1! Cereals + F&V + Legums + Othercrops + Meat + Dairy + Eggs = 100%							NB4! Fruits include nuts
	NB2! Cereals include (but not only) wheat and maize products							NB5! Othercrops are mainly Sugarbeet and aromatic plants
	NB3! F&V include Fruits and Vegetables							NB6! Meat include Red meat and Pouletry meat
	Cereals	Blé et produits	Maïs et produits		V&T&F	Legums	Fruits	Vegetables	Tubers	Peanuts	Nuts	Sugar and product	Added oil fat	Other products	Meat	Beaf&Lamb	Pouletry meat	Pork	Dairy product	Eggs	Fish	Crop products	Animal Products
Energy	35.361	33.092	1.17579	0.119993	12.8383	0.69102	1.83115	0.964764	10.0423	0.000665441	0.57385	18.4272	0.0597098	0.385138	7.82533	2.83795	0.423004	4.56437	21.9861	1.37595	0.476358	68.3363	31.6637		100
Protein	29.6217	27.663	0.901905	0.0735888	6.57639	1.41239	1.21174	0.9869	4.37776	0.000714209	0.207848	0.346142	0	0.447126	22.6681	11.3566	1.47263	9.83888	34.3626	3.52095	0.836695	38.6116	61.3884		100
Carbs	42.6829	40.095	1.34019	0.168696	14.6812	0.531227	2.04666	1.05329	11.5813	9.70746e-05	0.0533473	30.2156	0	0.642214	0.195978	0.0814611	0.012458	0.102059	10.8091	0.0535324	0.134968	88.8065	11.1935		100
Sugar	2.92477	1.99879	0.875244	0.00342407	5.77301	0.460125	3.3366	1.33257	1.10384	6.01021e-05	0.0308998	69.7243	0	0.0407582	0.190628	0.0456449	0.00701285	0.13797	20.6507	0.0766232	0.128173	78.9539	21.0461		100
Amidon	78.8258	74.4895	1.95142	0.292191	20.4128	0.380388	0.781539	0.0798463	19.5514	0.000127197	0.0382516	0	0	0.202251	0.0533595	0.0258953	0.00509014	0.0223741	0	0	0.0872197	99.8594	0.140579		100
Fibre	60.1336	53.2534	3.65784	0.100652	28.3288	5.18775	6.14967	5.60469	16.5745	0.000942423	0.427642	0.458744	0	4.23021	0.520072	0.0782646	0.0374234	0.404384	0	0	0.713131	98.7668	1.2332		100
Fat	17.3225	16.0802	0.707111	0.0215045	10.2563	0.328765	1.22917	0.356898	8.67023	0.00206321	2.12656	0.145948	0.251744	0.19316	19.1763	5.11259	0.885345	13.1784	44.541	4.54363	1.11411	30.6249	69.3751		100
AGS	10.0464	9.56817	0.245867	0.00833678	4.83947	0.290085	0.437024	0.152194	4.25025	0.000769321	0.447376	0.0526633	0.0424644	0.214261	16.565	4.52863	0.619301	11.417	63.4964	3.01076	0.995184	15.9327	84.0673		100
Agmi	15.0753	14.2555	0.331116	0.0195966	13.308	0.0917215	1.15623	0.320092	11.8317	0.00299189	1.89259	0.00644307	0.437896	0.201532	23.3336	5.72533	1.10064	16.5077	39.0576	5.50815	1.08716	31.0134	68.9866		100
Agpi	35.0197	32.2035	1.44943	0.0629969	20.1132	0.91104	2.86457	0.707903	16.5407	0.00344038	8.66776	0.0162022	0.496171	0.544796	15.1622	2.79833	1.19583	11.1681	12.7466	4.82321	1.49908	65.7689	34.2311		100
Vit A (Ret)	1.08689	1.08383	0	0	1.52428	0	1.0226e-05	0.11873	1.40554	0	0	0	0	0	31.0094	23.0413	0.17192	7.79617	55.2543	9.65236	1.47276	2.61117	97.3888		100
BC	4.8857	4.6011	0.25976	0.00406037	51.8809	5.66363	9.92302	41.5538	0.404075	0	0.0216304	0	0	0.605266	0.581333	0.303203	0.0149347	0.263196	35.4533	0.277061	0.63119	63.0571	36.9429		100
Vit E	58.5778	56.9705	0.899274	0.0858638	22.0436	0.493786	3.28186	2.24393	16.5178	0.000993691	1.27778	0	0.513753	0.867094	3.87036	1.92194	0.245875	1.70255	5.9927	5.00055	1.36258	83.7738	16.2262		100
Sodium	32.5569	28.7901	3.6517	0.0138348	13.4753	0.824952	3.41739	1.40646	8.65144	0.000534287	0.0073457	0.802048	5.18265e-05	0.0312954	28.3463	7.45767	0.754241	20.1344	20.5576	1.31702	2.08115	47.6979	52.3021		100
Magnesium	46.1992	41.7137	2.01786	0.258296	15.7809	1.78581	3.91298	2.20566	9.6623	0.0012491	0.538415	3.38538	0.000130112	1.5871	4.9959	2.38764	0.360976	2.24728	24.3934	0.574354	0.759349	69.277	30.723		100
Phosphore	28.3684	25.8543	0.893534	0.156508	8.7237	1.11922	1.67187	1.33158	5.72024	0.000456107	0.272448	0.139613	0	0.391008	9.81463	4.68541	0.594481	4.53474	48.5222	1.9996	0.649128	39.0144	60.9856		100
Potassium	16.5281	14.0411	1.7675	0.0595695	31.6079	1.52572	5.70438	3.94642	21.9571	0.000431861	0.237649	2.59348	1.93497e-05	1.11388	7.77673	3.45928	0.447338	3.87011	37.2739	0.796085	0.546496	53.6068	46.3932		100
Calcium	7.1793	6.79657	0.0743372	0.015739	4.54319	0.785576	0.680545	1.78231	2.08034	0.000104431	0.103556	3.95429	0.000163406	1.18557	1.00934	0.454706	0.0557756	0.498861	79.7189	0.875706	0.644438	17.7516	82.2484		100
Manganese	67.2482	60.1948	0.836829	0.443043	12.5656	1.72073	3.22433	3.16237	6.17893	0.00102374	1.27961	1.58516	3.4126e-05	11.2297	1.06279	0.409693	0.102257	0.550844	1.952	0.220192	1.13594	95.6291	4.37093		100
Iron	41.2405	37.695	0.994883	0.167826	17.9173	2.72911	4.31189	3.3082	10.2972	0.000365086	0.345308	6.77114	0.000391032	5.51121	17.24	9.16103	0.478137	7.60085	3.15511	3.39879	1.69117	74.5149	25.4851		100
Cuivre	46.8574	44.4076	0.663044	0.174381	18.299	2.0312	3.96945	2.72928	11.6003	0.0010639	1.18917	1.63532	0.000572827	2.76694	13.7227	10.4276	0.359526	2.93559	11.3619	1.00715	1.12871	72.7796	27.2204		100
Zinc	32.2915	29.7391	0.938279	0.160095	6.97523	1.10717	1.42923	1.27825	4.26775	0.000668465	0.321013	0.528347	0.000374129	0.384043	24.8044	16.7278	0.779845	7.29674	30.7283	1.96593	0.893705	41.6076	58.3924		100
Selenium	39.822	37.3529	1.18706	0.133173	14.4113	1.79802	2.36661	3.38753	8.65719	0.000150164	0.146563	1.99572	0.00709992	0.17509	7.72708	3.07654	0.594584	4.05596	27.6336	5.42074	0.862798	58.3558	41.6442		100
Iode	13.0493	12.7347	0.0519103	0.0463669	5.96382	0.89805	0.651863	1.51943	3.79252	4.657e-05	0.0481736	0.12	0	0.101542	2.72316	0.916115	0.203839	1.6032	69.2205	6.93934	0.936155	20.1809	79.8191		100
Food	24.5147	22.397	1.46561	0.0785458	14.4977	1.46953	3.11857	2.61555	8.76355	0.000141888	0.12346	6.16004	0.00876592	0.212076	4.47805	2.01083	0.276686	2.19053	46.8516	1.33321	0.35088	46.9863	53.0137		100

## Sheet: Production-Nutrients Results
Nutrients supply based on agricultural production
			nrj_kcal	proteines_g	glucides (Carb)_g	sucres_g	amidon_g	fibres_g	FAT (lipide)_g	ags_g	agmi_g	agpi_g	retinol_mcg	beta_carotene_mcg	vitamine_e_mg	sodium_mg	magnesium_mg	phosphore_mg	potassium_mg	calcium_mg	manganese_mg	Iron_mg	cuivre_mg	zinc_mg	selenium_mcg	iode_mcg
68287487	Total production		3376.42	117.103	514.198	220.8	251.419	31.7406	88.9816	39.6052	30.5395	12.1445	616.077	3171.97	12.0777	2420.45	499.275	2255.02	4746.44	1768.4	4.92305	13.1757	2.03348	15.5672	157.752	360.741
/CAPITA/YEAR
	Crop production		2307.32	45.2152	456.641	174.33	251.066	31.3492	27.2505	6.31018	9.47135	7.98731	16.0868	2000.15	10.118	1154.5	345.883	879.781	2544.42	313.919	4.70787	9.81788	1.47995	6.47715	92.0576	72.8007
	Animal production		1053.02	70.9077	56.8631	46.1868	0.134156	0.165074	60.7397	32.9009	20.7361	3.97515	590.917	1151.79	1.79518	1215.57	149.601	1360.6	2176.09	1443.08	0.15926	3.13502	0.530569	8.95095	64.3336	284.563

## Sheet: Nutrients SS - Comp
	nrj_kcal	proteines_g	glucides (Carb)_g	sucres_g	amidon_g	fibres_g	FAT (lipide)_g	ags_g	agmi_g	agpi_g	retinol_mcg	beta_carotene_mcg	vitamine_e_mg	sodium_mg	magnesium_mg	phosphore_mg	potassium_mg	calcium_mg	manganese_mg	Iron_mg	cuivre_mg	zinc_mg	selenium_mcg	iode_mcg
FAO&WHO&NIH&NHS Recommended Dietary Allowances (RDAs) of nutrients (See Annex : Nutrients requirement calculations)	2413.08	63.13	331.8	28	250	25	78.6	26.2	39.3	13.09	671	8056	13.9	1920	214	738	3183	1058	1.94	11.5	0.834	8.88	51	118.16
France_2014 (See annex Nutrient consumption based on food)	1967.73	77.657	214.444	90.487	101.935	17.5834	74.5488	31.6335	27.8193	8.8649	475.216	3124.28	10.6389	2277.55	288.912	1155.46	3082.05	849.044	3.0005	9.65839	1.32769	9.46122	143.794	162.514
Total Production	3376.42	117.103	514.198	220.8	251.419	31.7406	88.9816	39.6052	30.5395	12.1445	616.077	3171.97	12.0777	2420.45	499.275	2255.02	4746.44	1768.4	4.92305	13.1757	2.03348	15.5672	157.752	360.741
Marianne	2149.6
FSS ratio (FAO&WHO)	1.39921	1.85495	1.54972	7.88571	1.00568	1.26963	1.13208	1.51165	0.777087	0.92777	0.918148	0.39374	0.8689	1.26065	2.33306	3.05558	1.49119	1.67145	2.53766	1.14572	2.43822	1.75307	3.09318	3.05299
FSS ratio (France_2014)	1.71589	1.50795	2.39782	2.44013	2.46646	1.80515	1.1936	1.252	1.09778	1.36995	1.29642	1.01526	1.13524	1.06274	1.72812	1.95163	1.54003	2.08281	1.64074	1.36417	1.53159	1.64537	1.09707	2.21976
NB1: The (FAO&WHO&NIH&NHS) Recommended Dietary Allowances (RDAs) of nutrients were calculated or defined based on the average individual (micronutrient calculations take into account the specific needs of different population groups and their respective proportions within France (or within the 12 regions of France).
NB2: France_2014 or Region_r_2014 represents the actual consumption levels of an average individual calculated for the corresponding population (France or regions), based on real food intake data of 2014. In this study, these values are considered as the actual nutrient demand fo population ofFrance or France's specific regions
