# Supplementary material
Source: Research Square preprint supplement (doi:10.21203/rs.3.rs-10301703/v1)
Supplement: Supplementary file 6 [file 77c5e20509419bc80f31b586.docx]

**Method overview on consumption database**

**Nutritional dataset:**

The nutritional composition data mainly comes from **the Ciqual&CALNUT database** (i.e., Ciqual 2020 table and the relevant complementary CALNUT table); which describe the nutritional composition of 3,185 foods consumed in France for 67 nutrients. Proxies were used for foods not included in these sources (n=22).

The nutrient values are expressed **per 100g of food**, in kcal, g, mg, or µg (mcg) (i.e., it depends on nutrient as indicated in the label).

**Consumption Data:**

***INCA3 survey***

The consumption data comes from the INCA3 survey: *“The INCA3 study (Individual National Study of Food Consumption) is the third national survey conducted by ANSES (French Agency for Food, Environmental and Occupational Health & Safety) to analyze the food consumption and dietary habits of the French population. Carried out between 2014 and 2015, it involved nearly 200 investigators and over 5,800 participants, including 3,157 adults (aged 18 to 79) and 2,698 children (aged 0 to 17). Participants answered around 150 questions about their eating habits and lifestyles. The study collected data from 13,600 consumption days, covering approximately 320,000 food items. A total of six years of work were required to carried out this valuable database, which now serves as a key reference for assessing dietary behaviors at France national level.”*

In the INCA3 survey, individual food consumption was assessed using a 24-hour dietary recall method conducted over two or three non-consecutive days. Participants were asked to report all foods and beverages consumed during the previous 24 hours, with data collected for one-two weekdays and one weekend or public holiday. This approach allows for a more accurate estimation of habitual dietary intake by accounting for day-to-day variability in eating patterns.

***How we used the INCA3 survey***

We defined the mean consumption of each food item for (n = 2121) adults (18-65 years), then estimated the consumption for the total population based on the energy needs of other sub-populations (children-adolescent “0-17 years” and the elderly “+65”), at both national and regional levels. One may ask why consumption estimates for children and older adults were derived indirectly rather than relying solely on their survey responses. The rationale lies in the limitations inherent in self-reported dietary data within these age groups. For younger children (particularly ages 6 to 12), food intake may be underreported due to unrecorded meals consumed outside the home or limited ability to recall all items. In the case of older adults, memory-related challenges may lead to incomplete dietary recall. To ensure greater accuracy and consistency, estimates were therefore derived using adult consumption data as a reference and adjusted using energy requirement ratios for each age group. This approach also allows for a more streamlined and standardized calculation framework.

**Limitation:** Certain consumption patterns specific to sub-populations are not taken into account (e.g., consumption of infant milk formula by infants).

1. **Calculation of the average daily consumption per individual participant (adult)**

**This calculation is performed individually for each adult participant in the INCA3 survey. It allows for estimating the average daily amount of a food item consumed, based on the available dietary recall data for each person.**

: quantity of food item (j) consumed on average per day by adult participant (i) (in g/day/participant)

: quantity of food item (j) consumed by adult participant (i) on recall day (k) (in g/participant)

: number of recall days for an adult participant (i) (2 or 3 days): A 24-hour dietary recall method conducted over two or three non-consecutive days for each adult participant.

1. **Calculation of average daily consumption per mean individual in a region**
   1. Calculation of average daily consumption per mean adult in a region

**In this step, we move from participant-level average identified from the survey to a regional mean adult average by assigning each individual participant weight to their respective region.**

**We weight the consumption of each food item according to each participant's “statistical” weight, in order to reflect the representativeness of their food consumption within the region’s population: the average consumption of a food item by a mean adult in region X.**

With :

: average quantity of food (j) consumed by a mean (i.e., weight) individual adult in region (r) (in g/day/capita)

: standardized weight coefficient of individual (i) belonging to region (r)

: weight of individual (i) belonging to region (r)

: number of individuals in region (r)

- 1. Calculation of average consumption per food item per region ***(entire population i.e., including Children-Adolescent; Adults and old adults)***
     1. Consumption of other sub-populations relative to adult consumption

We calculate the average energy requirements for each sub-population (children-adolescent (1-17 years), young adults (18-65 years), older adults (+65 years)) and then the ratio compared to the needs of young adults (see Energy requirements by sub-population.csv).

| Population | Report to young adults required energy |
| --- | --- |
| Children & Adolescent (1-17 ans) | 0,78 () |
| Young adults (18-65 ans) | 1,00 |
| Older adults (66 ans et +) | 0,91 () |

- - 1. Proportion of sub-populations within the total population

We use data from INSEE (see pop demog.csv):

- *The proportion of each sub-population within each region ().*

**We calculate the average consumption of a mean individual representative of the population in each** region based on the quantities consumed by adults, the consumption ratio of the sub-populations, and the proportion of each sub-population within each region **(in g/day/region for each food item)**.

**: average quantity of food j consumed by a mean individual m in region r (in g/capita/day) 🡪 variable *Region_r_moy***

: average quantity of food j consumed by an adult in region r (in g/day/individual)

: proportion of adults in region r

: proportion of children and adolescents in region r

: proportion of older adults in region r

 : ratio of energy requirements of children and adolescents relative to adults

 : ratio of energy requirements of older adults relative to adults

1. **Calculation of average consumption for the France population**

**Same steps as in section 2, using individual weights (statistical weight) and sub-population proportions of overall France population demography → variables France_moy.**
