# Supplementary material
Source: Research Square preprint supplement (doi:10.21203/rs.3.rs-10301703/v1)
Supplement: Supplementary file 7 [file 86dfde5d673f3cfa4badce4a.docx]

**Method overview on nutrients requirement calculations**

**Recommended Dietary Allowances (RDAs) of Energy/Protein and micronutrients**

Nutrient intake recommendations—including those for energy, protein, and various micronutrients—were calculated based on age reference values. In some cases, additional sub-criteria such as sex-specific, weight, physical activity level, basal metabolic rate, or specific physiological needs were also integrated. To define these recommendations, we prioritized and drew upon a range of international reports and data tables, primarily from the World Health Organization (WHO), the Food and Agriculture Organization (FAO), the National Institutes of Health (NIH), and other global health institutions. For clarity and reproducibility, detailed estimations incorporating the full range of sub-criteria (e.g., sex, activity level) were performed separately due to their computational complexity. The final nutrient values, aggregated by primary age category, are presented in the accompanying Excel document.

*Age categories criteria*

The age category proportions used to define nutrient requirements for an average individual—both at the national and regional levels in France—were determined based on 2014 statistics from the French National Institute of Statistics and Economic Studies (INSEE). However, the age categories defined by the reference recommendations are not directly compatible with the categories used in French population statistics (regarding the proportions of the France or regions population). The statistics provide three categories (children-adolescent “0-17 years”; adults “18-65” and Old adults “+65 years”), while the recommendations provide more detailed subdivisions within age groups. To reconcile this discrepancy, we applied a weighted averaging method based on the number of years included in each reference category. We therefore formulated the assumption that within each statistically defined age group (e.g., 0–17 years), the distribution of the population across individual ages is uniform. In other words, the proportion of individuals aged 1–4 years is assumed to be equivalent to that of those aged 5–8 or 9–12 years, **as long as the interval of sub-categories is the same, and they fall within the same overall category (i.e., 0-17 years)**. This assumption allows for a reasonable approximation using weighted average statistics to adapt the reference data to the statistics of France or Regions demographic structure.

*Sex-specific sub-criteria*

The nutritional recommendations presented in the references include, within each age group, a sex-specific categorization (male and female), with distinct values for each sex. Since the French population is composed of 51.6% women and 48.4% men, we used these proportions to weight the sex-specific recommendations within each age group.

*Weight-specific sub-criteria*

We used statistics from The Obesity League organization to define the average body weight of an individual in the French population, estimated at 74,1 kg, which served as the reference for calculating protein requirements. In some cases—particularly for energy requirement estimations—body weight needs to be specified by sex, in which case we used the values of 67 kg for women and 81 kg for men. When body weight data were required by age category which is not available in national datasets, we referred to average weight statistics from a demographically comparable European country (e.g., Belgium) or used global estimates as proxies.

*Other sub-criteria*

For energy requirements, other parameters integrated into the recommendations – such as basal metabolic rate (BMR) and activity level – were also setting up using the average values defined in the reports (WHO or FAO reports). These estimations were based on a set of reference values stratified by sex and age category, and were used to compute the final recommendations. For micro-nutrients, these parameters (e.g., BMR) were not required, and calculations were performed based solely on age categories.

**Recommended Dietary Allowances (RDAs) of other macronutrients (Fat and Carbs)**

In particular cases for certain macronutrients like carbohydrates and fats (and sub-categories like sugar, starch, saturated fat, mono-unsaturated fat etc.), the WHO/FAO recommendations are expressed as percentages of total energy intake. For example, the recommended intake for carbohydrates is 55% of total energy. Therefore, nutrient recommendations were computed based on the average energy requirement of a representative individual.

**Note:** All calculations are documented in the supplementary Excel file, which transparently presents the methodology and values described above. Furthermore, all reference documents used to establish the recommendations are provided as supplementary materials.
