# Supplementary material
Source: Research Square preprint supplement (doi:10.21203/rs.3.rs-10301703/v1)
Supplement: Supplementary file 8 [file a83f4636358b638a3350a9cd.xlsx]

## Sheet: Nutrients requirement limits
pyramide insee https://www.insee.fr/fr/outil-interactif/5014911/pyramide.htm?#!y=2014&a=18,66&v=2&t=2&c=75	region	prop Children&Adollescent 0-17 year	prop adults 18-65 year	prop Older adults +65 year	Men,Women (48,4 ; 51,6 %)		Recommended Dietary Allowances (RDAs) of Energy/Protein and micronutrients	Energy (Calories)	WHO&FAO	ADULT: BMR = 1.75 (a mean for men and women)	The Obesity League: Average weight of the French population in 2020 is 74,1 KG (81M , 67W)			Proteine (g)	WHO&FAO (Wu , 2016)	The Obesity League: Average weight of the French population in 2020 is 74,1 KG (81M , 67W)		total	Total per total weight		Calcium mg	WHO&FAO			total		Vit-E mg	Recommended NIH (National Institu of Health)					Sodium mg	EFSA Panel on Nutrition, Novel Foods and Food Allergens (NDA)					Selenium mcg	Recommended NIH (National Institu of Health)					Retinol mcg	Recommended NIH (National Institu of Health)
1	Idf	0.13	0.64	0.23			Child&Adol (0-17 year)	1965	255.45	1727.36	452.41	2435.22		0.93	0.1209	0.5312	0.1909	0.843	62.4663		1030	133.9	640	299	1072.9		10	1.3	9.6	3.45	14.35		1640	213.2	1280	460	1953.2		37	4.81	35.2	12.65	52.66		570	74.1	448	161	683.1
2	normandie	0.22	0.6	0.17			Adults (18-65 year)	2699	432.3	1619.4	334.39	2386.09		0.83	0.2046	0.498	0.1411	0.8437	62.5182		1000	226.6	600	221	1047.6		15	2.2	9	2.55	13.75		2000	360.8	1200	340	1900.8		55	8.14	33	9.35	50.49		700	125.4	420	119	664.4
3	centre	0.22	0.59	0.19			Older Adult (+65 year)	1967	432.3	1592.41	373.73	2398.44		0.83	0.2046	0.4897	0.1577	0.852	63.1332		1300	226.6	590	247	1063.6		15	2.2	8.85	2.85	13.9		2000	360.8	1180	380	1920.8		55	8.14	32.45	10.45	51.04		700	125.4	413	133	671.4
4	loire	0.23	0.6	0.17					451.95	1619.4	334.39	2405.74			0.2139	0.498	0.1411	0.853	63.2073			236.9	600	221	1057.9			2.3	9	2.55	13.85			377.2	1200	340	1917.2			8.51	33	9.35	50.86			131.1	420	119	670.1
5	bretagne	0.22	0.6	0.19					432.3	1619.4	373.73	2425.43			0.2046	0.498	0.1577	0.8603	63.7482			226.6	600	247	1073.6			2.2	9	2.85	14.05			360.8	1200	380	1940.8			8.14	33	10.45	51.59			125.4	420	133	678.4
6	hauts	0.24	0.61	0.15					471.6	1646.39	295.05	2413.04			0.2232	0.5063	0.1245	0.854	63.2814			247.2	610	195	1052.2			2.4	9.15	2.25	13.8			393.6	1220	300	1913.6			8.88	33.55	8.25	50.68			136.8	427	105	668.8
7	est	0.21	0.62	0.17					412.65	1673.38	334.39	2420.42			0.1953	0.5146	0.1411	0.851	63.0591			216.3	620	221	1057.3			2.1	9.3	2.55	13.95			344.4	1240	340	1924.4			7.77	34.1	9.35	51.22			119.7	434	119	672.7
8	bourgogne	0.21	0.6	0.19					412.65	1619.4	373.73	2405.78			0.1953	0.498	0.1577	0.851	63.0591			216.3	600	247	1063.3			2.1	9	2.85	13.95			344.4	1200	380	1924.4			7.77	33	10.45	51.22			119.7	420	133	672.7
9	auvergne	0.22	0.61	0.17					432.3	1646.39	334.39	2413.08			0.2046	0.5063	0.1411	0.852	63.1332			226.6	610	221	1057.6			2.2	9.15	2.55	13.9			360.8	1220	340	1920.8			8.14	33.55	9.35	51.04			125.4	427	119	671.4
10	paca	0.21	0.6	0.2					412.65	1619.4	393.4	2425.45			0.1953	0.498	0.166	0.8593	63.6741			216.3	600	260	1076.3			2.1	9	3	14.1			344.4	1200	400	1944.4			7.77	33	11	51.77			119.7	420	140	679.7
11	occitanie	0.21	0.6	0.19					412.65	1619.4	373.73	2405.78			0.1953	0.498	0.1577	0.851	63.0591			216.3	600	247	1063.3			2.1	9	2.85	13.95			344.4	1200	380	1924.4			7.77	33	10.45	51.22			119.7	420	133	672.7
12	aquitaine	0.2	0.6	0.2					393	1619.4	393.4	2405.8			0.186	0.498	0.166	0.85	62.985			206	600	260	1066			2	9	3	14			328	1200	400	1928			7.4	33	11	51.4			114	420	140	674
	France métropolitaine	0.22	0.61	0.17					432.3	1646.39	334.39	2413.08			0.2046	0.5063	0.1411	0.852	63.1332			226.6	610	221	1057.6			2.2	9.15	2.55	13.9			360.8	1220	340	1920.8			8.14	33.55	9.35	51.04			125.4	427	119	671.4
									0-17 year	18-65 year	(+65 year)	Total			0-17 year	18-65 year	(+65 year)	Total				0-17 year	18-65 year	(+65 year)	Total			0-17 year	18-65 year	(+65 year)	Total			0-17 year	18-65 year	(+65 year)	Total			0-17 year	18-65 year	(+65 year)	Total			0-17 year	18-65 year	(+65 year)	Total
							Recommended Dietary Allowances (RDAs) of macronutrients calculated or defined directly in WHO-FAO reports	Other refernce
							Carbs (g) (55% of total energy intake)	-
							331.8
							Sugar (g) (Healthy intake)	United Kingdom National Health Service
							28
							Fiber (g) (WHO recommendation based on Vegetables&Fruits recommended intake)	-
							25
							Amidon (g)	-
							250
							FAT (g) (WHO-FAO recommendation)	-
							79
							Sat Fat (g) (Healthy intake)	-
							26
							MUS Fat (g) (Healthy intake)	-
							39
							PUS Fat (g) (Healthy intake)	-
							13
