# Supplementary material
Source: Research Square preprint supplement (doi:10.21203/rs.3.rs-10301703/v1)
Supplement: Supplementary file 9 [file e0626e49af16df303e9aa75b.docx]

**Method overview-details on production database**

**Nutritional dataset:**

The nutritional composition data mainly comes from the Ciqual&CALNUT database «<https://ciqual.anses.fr/>» (i.e., Ciqual 2020 table and the relevant complementary CALNUT table); which describe the nutritional composition of crop/animal products in France. USDA Food Data Central proxies were used for foods not included in these sources (n=5).

24 macro- and micro-nutrients **(presented in the csv. database)** values are expressed per 100g of crop/animal product, in kcal, g, mg, or µg (mcg) (i.e., it depends on nutrient as indicated in the label).

**Production dataset**

1. Raw dataset of crop and animal production

Data on gross production of both crop and animal products were extracted from the “Agreste” database (<https://agreste.agriculture.gouv.fr/agreste-web/>): *“a publicly accessible platform maintained by the Statistics and Forecasting Service of the French Ministry of Agriculture and Food. For over two decades, Agreste has provided comprehensive agricultural statistics across a wide range of topics, including crop yields, milk prices, wine production, and broader economic indicators. This dataset serves as a key national reference for monitoring agricultural performance in France”.*

The raw data used in this study were extracted from the most recent available agricultural campaign (2022) and are provided at multiple spatial scales: from the smallest units—agricultural zones—up to French departments, the 12 administrative regions, and the national level. For the purposes of this study, we focus specifically on regional and national scales. The dataset covers two key components: (i) crop yields and agricultural land area for various crop types (including both food and forage crops), from which total crop production was calculated at both regional and national levels; and (ii) livestock data, expressed as the number of animals by species and production category.

All values represent raw production data and required substantial processing to estimate the fraction of production intended for human consumption. In the case of livestock, further steps were taken to determine the net animal product output from the reported herd sizes. The following section details the conversion factors and methodological assumptions applied to derive net production values used in this analysis.

1. Conversion coefficients and factors
2. Crop production

For crop production, an initial processing step was undertaken to convert raw production data into estimates relevant for human consumption. This involved the application of three main types of coefficients to account for non-food uses, specifically: Feed–Forage or Cereals, Feed–Grass, and Food–Industrial (non-food), allowing for the exclusion of crops used entirely (100%) for these purposes. For all other crops, partial allocation coefficients were defined to estimate the proportion used for: (i) animal feed (forage, cereals, oilseeds, and protein crops), (ii) non-food industrial purposes (including biofuel production), (iii) losses along the value chain (e.g., transport and handling), and (iv) seed use.

The values of these allocation coefficients for each crop were primarily derived from FAOSTAT statistics for the year 2022, and supplemented with data from “Agreste” reports specific to the 2022 French crop season. Each coefficient represents the share of gross production *(Pg)* allocated to a specific use category *(Pi)*. The net coefficient for human consumption was then calculated as the remainder, defined as 1 minus the sum of all non-food and loss-related coefficients. When applied to the gross production, this net coefficient yields the net crop production *(Pn)* available for direct human consumption.

1. Animal production

For animal production, the raw dataset provides information on livestock headcounts by species and category, which does not directly reflect net production. To estimate net animal product availability in 2022, the analysis must instead rely on the actual quantities of products made available to consumers during the year 2022. Therefore, our focus is placed on four principal categories of animal-based products: meat&offal, milk, eggs, and fish.

It is important to note that certain animal categories intended for breeding purposes are excluded from these calculations, as individuals in these groups do not contribute directly to the production of consumable animal products.

*Meat products*

;

For meat production, we used livestock census data *(Nc)* and “Agreste & FranceAgriMer” reports to estimate the net produced quantity of meat available for consumption *(Pn)*. A first coefficient was established for each animal category destined for meat production—namely, cattle, sheep, pigs, goats, and poultry. This coefficient *(Cs)* represents the ratio of animals slaughtered in 2022 *(Sa)* to the total livestock population in the same year *(Nc)*, thereby allowing us to identify the share of animals effectively contributing to net production of each category of animals.

Next, two additional factors were extracted from “Agrest” and “FranceAgriMer” reports and applied to each slaughtered animal: the average target slaughter weight *(Wt)* and the yield rate of edible meat and offal *(YM&O)*. Together, these factors enabled the estimation of net meat and offal production for each livestock category.

*Milk and eggs products*

For milk production, we first identified the animal categories responsible for dairy output, namely dairy cows, dairy sheep, and dairy goats. For each category, a coefficient representing the average annual milk yield per animal was established. This value was derived from “IDELE” (French Livestock Institute) reports by dividing the total annual milk production by the livestock population of each respective category. *Although this coefficient serves to link total production to herd size—useful for future individual-level estimations—*the final analysis focused directly on the total net milk production per category for the year 2022.

A similar approach was applied to egg production. We used official statistics from “Agreste” report of 2022 to determine the total number of eggs produced in this year and related this figure to the number of laying hens. This yielded a coefficient of average egg production per bird per year, which can also be used for individual-level studies. However, for our current purposes, the net production was taken as the total reported egg output in 2022.

*Fish (or Sea-water) products*

Exceptionally, raw production data for seafood were not extracted from the Agreste database. Instead, national and regional-level statistics (also available at the departmental level) were obtained from a report by FranceAgriMer titled Key Figures for Fisheries and Aquaculture in France – 2023 Data. Three main categories of marine products were identified: fish (from both capture fisheries and aquaculture), shellfish, and algae. Unlike livestock data, which are based on headcount, these marine product values are expressed in weight (tons).

To estimate net edible production, a single conversion coefficient was applied—representing the proportion of net meat yield from raw seafood—sourced from relevant FranceAgriMer report and other websites.

**Note:** **All calculations are documented in the supplementary Excel file, which transparently presents the methodology and values described above. Furthermore, all reference documents used to establish the recommendations are provided as supplementary materials.**
